# Supplementary material
Source: PubMed Central journal article supplement (PMC3273988)
Supplement: NIHMS304953-supplement-Supplementary_Data.pdf [file NIHMS304953-supplement-Supplementary_Data.pdf]

## Online Supplementary Material:

### Experimental Procedures

**Cells:** Fresh adult whole bone marrow (BM) was purchased from All Cells, Inc. (Emeryville, CA). Unmatched human peripheral blood was purchased from the Stanford Blood Bank according to an IRB-approved protocol. All blood and bone marrow samples were collected in heparin sulfate anticoagulant, stored at room temperature for 4-6 hours, and then separated over Ficoll-Paque Plus (Amersham Biosciences) using Accuspin tubes (Sigma-Aldrich, St. Louis, MO) to remove erythrocytes, platelets, and granulocytes. Cells were used fresh prior to 34-parameter mass cytometry experiments, or frozen in FCS with 10% DMSO. Cells were rested at 37°C, 5% CO<sub>2</sub> for 1 hour in RPMI with 10% FCS (supplemented with 2mM EDTA in the case of frozen samples), 1X L-glutamine and 1X penicillin/streptomycin (Invitrogen).

**Antibodies:** A summary of all mass cytometry antibodies, reporter isotopes and concentrations used for analysis can be found in Methods Table 2. With the exception of CD3-QDot 655 (Invitrogen, Carlsbad, CA), primary conjugates of mass cytometry antibodies were prepared 100 µg at a time using the MaxPAR antibody conjugation kit (DVS Sciences, Toronto, Canada) according to the manufacturer's recommended protocol. Following labeling, antibodies were diluted in Candor PBS Antibody Stabilization solution (Candor Bioscience GmbH, Wangen, Germany) to between 0.1 and 0.3 mg/mL and stored long-term at 4°C. Each antibody clone and lot was titrated to optimal staining concentrations using cell lines and primary human samples.

For the comparison of mass cytometry and fluorescence flow cytometry data, commercially available, fluorescently labeled antibodies were used. The pre-methanol staining panel consisted of: (1) Pacific Blue CD8 (clone RPA-T8); (2) V500 CD4 (clone RPA-T4) (BD Biosciences, San Jose, CA); (3) Qdot 605 CD45RA (clone MEM-56) (Invitrogen); (4) Alexa Fluor 700 CD56 (NCAM) (BioLegend, San Diego). The post-methanol staining panel consisted of: (1) PE CD3 (clone UCHT1); (2) PerCP-Cy5.5 CD20 (clone H1(FB1)); (3) PE-Cy7 CD33 (clone 67.6); (4) Alexa Fluor 488 phospho-STAT3; (5) Alexa Fluor 647 phospho-STAT5 (all from BD Biosciences, San Jose, CA).

**Stimulation of peripheral blood and bone marrow with phospho-signaling analysis:** Stimulation and cellular staining protocols were based on procedures previously described by (1). Briefly, after resting cells 1 hour, cytokines were

added and cells were returned to the 37°C incubator for 15 minutes. A summary of stimuli and inhibitors can be found in Methods Table 1. Where indicated, chemical inhibitors were added to cells for the final 30 minutes of the rest, prior to stimulation. To halt signal transduction, cells were fixed with formaldehyde (PFA; Electron Microscopy Sciences, Hatfield, PA) added directly to growth media at a final concentration of 1.6% for 10 minutes at room temperature. Cells were then centrifuged at 500g for 5 minutes and washed once with staining media (PBS with 0.5% BSA, 0.02% sodium azide) to remove residual PFA, and blocked with Purified Human Fc Receptor Binding Inhibitor (eBioscience Inc., San Diego, CA) following manufacturer's instructions. Surface marker antibodies were added yielding 50 or 100  $\mu$ L final reaction volumes and stained at room temperature for 30min. Following staining, cells were washed 2 more times with cell staining media then permeabilized with 4°C methanol for at 10 min at 4°C, then optionally stored at -80°C for later use. Cells were then washed twice in cell staining media to remove remaining methanol, and then stained with phospho-specific antibodies in 50 or 100  $\mu$ L for 30 min at room temperature. For fluorescence analysis, cells were then washed once in cell staining media and analyzed using a BD LSRII (BD Biosciences, San Jose, CA). For mass cytometry analysis, cells were washed once in cell staining media, stained with 1 mL of 1:4000  $^{191/193}\text{Ir}$  DNA intercalator(2) ([www.dvssciences.com](http://www.dvssciences.com); DVS Sciences, Richmond Hill, Ontario, Canada) diluted in PBS with 1.6% PFA for 20 mins at room temperature. Cells were then washed once with cell staining media and then finally with PBS alone. Care was taken to assure PBS and buffers preceding CyTOF™ analysis were not contaminated with metals in the mass range above 200 AMU analysis range. In cases where cells were not treated with methanol, the iridium intercalator was used at 1:2500. Mass cytometry samples were diluted in  $\text{dH}_2\text{O}$  to approximately  $10^6$  cells per mL and then analyzed on a CyTOF™ mass cytometer(3)(DVS Sciences, Toronto, Canada) equilibrated with  $\text{dH}_2\text{O}$ .

**Mass cytometry viability (membrane permeability) staining:** Where indicated, cells were viability stained for mass cytometry analysis during the 15 minute stimulation period. Here, the viability dye was mixed 1:20 with stimulation media. Viability dye was made fresh by creating a solution of 30 mM  $\text{RhCl}_3$  (Sigma-Aldrich, St. Louis, MO) and 60 mM DOTA-NHS ester (Macrocyclics, Dallas TX) in 50% v/v DMSO in L-Buffer (DVS Sciences, Toronto, Canada). Dasatinib-treated cells from the unmatched bone marrow were viability stained in a 3-fold higher concentration of viability dye (i.e. 4.5 mM final concentration) due to a technical error.

**Mass cytometry measurement:** A review of initial mass cytometry analysis

methods can be found by Ornatsky *et al.*(4). Here, cells were acquired on the CyTOF™ mass cytometer (www.dvsscience.com; DVS Sciences, Richmond Hill, Ontario, Canada) at an event rate of approximately 500 cells per second. The instrument was run in high-resolution mode (Mass resolution ~700) with internally calibrated dual-count detection. Noise reduction and cell extraction parameters were: cell length 10-65, lower convolution threshold 10. A cell subtraction value was set to -100. After acquisition, the effect of the cell subtraction setting was negated by subtracting a value of 100 from every channel of each FCS file using the FlowCore package for R (5). Also using FlowCore, the cadmium 110, 111, 112, and 114 values were summed to create a single representative channel for the CD3-QDot 655 used in the mass cytometry analysis. For both BM samples, data collection was carried out over multiple days, during which a systematic decay in the signal intensity was observed over a scale of hours. To help minimize this, each day standard cleaning of the instrument was performed. To account for remaining variability between samples, the intensity of each parameter was modeled over time to account for systematic signal decay, and to allow normalization of samples from different days to a consistent baseline. Biological replicates of the unstimulated condition were collected at the beginning and end of each day, and used to calculate a linear regression that estimates the dependence of signal intensity on absolute event number. The change in signal intensity over time for each channel of each unstimulated sample was estimated using the median intensity in overlapping sliding windows of 5000-10,000 cells each, sliding in increments of 1,000 from the first to the last cell in the sample, yielding 395 data points from a typical FCS file with 400,000 events. Values between 0 and 2 were common when antigen expression is at or below the threshold of detection therefore, to avoid their predominance, values < 2 were excluded from the line fitting procedure. Lines with equations  $s=m*n+b$  were fit to the unstimulated samples each day, where  $s$  is signal,  $n$  is the cell number ("event number") and  $m$  and  $b$  are fit parameters signifying the slope of the decay curve and the maximal signal intensity on that day ('y-intercept'), respectively. The individual events were multiplied by  $s_N/(m*n+b)$ , where  $s_N$  is a constant representing the signal at the last cell, thus normalizing each event to the signal level at the end of the last day.

**Data visualization:** All cell density plots shown were created in Cytobank(6) (www.cytobank.org, Cytobank, Inc., Menlo Park, CA). For mass cytometry data, all parameters except time and cell length were displayed with an arcsinh transformation and a scale augment of 5 ranging from -20 to 10000. Cell length

and time were displayed on linear scales. LSRII data was displayed using default Cytobank scales (arcsinh with a scaling argument of 150, ranging from -200 to 262,144). Justification for the use of these different transformations is provided in Fig. S2.

**Phospho-signaling and mass cytometry data analysis:** Normalized, background-subtracted FCS files were imported into Cytobank for single cell and population gating. Cytobank was also used to create the heatmaps comparing fluorescence and mass cytometry measurements using log<sub>2</sub> ratio of the stimulated population phospho-STAT mean fluorescent intensity (MFI) versus the unstimulated control. For larger heatmaps, the median intensity values from the indicated cell populations (Fig. 3A) were exported from Cytobank and imported into Spotfire (TIBCO Software, Inc., Palo Alto, CA) to create of heatmaps, drug response X-Y plots, and perform hierarchical clustering. Clustering was performed using UPGMA with Euclidean distance measurements and normalization by means. For spanning tree visualization and comparison, singlet-gated FCS files were exported from Cytobank and analyzed using SPADE in Matlab v.R2010a (The Mathworks, Inc., Natick, MA) as described below.

For all of the mass cytometry analysis, signaling induction was calculated using the average of the median scaled arcsinh values of 5 untreated replicates, minus the median scaled arcsinh value of a stimulated condition. To minimize the noise in measurements where the data is close to zero (the limit of detection on the mass cytometry scale), the median intensities in were scaled (divided by 5) prior to archsinh calculations. An example calculation and comparison of archsinh difference to fold change is shown below:



For example:

| Sample                                       | Number of cells downsampled in Node X | Number of cells upsampled in Node X | Median scaled arcsinh intensity of pSTAT5 in Node X (median(arcsinh(intensity/5))) |
|----------------------------------------------|---------------------------------------|-------------------------------------|------------------------------------------------------------------------------------|
| Unstim 1                                     | 54                                    | 3132                                | 1.4                                                                                |
| Unstim 2                                     | 62                                    | 3286                                | 1.2                                                                                |
| Unstim 3                                     | 81                                    | 4050                                | 1.3                                                                                |
| Unstim 4                                     | 71                                    | 3692                                | 1.6                                                                                |
| Unstim 5                                     | 87                                    | 4437                                | 1.5                                                                                |
| TPO                                          | 54                                    | 3240                                | 4.5                                                                                |
| <b>Unstim Average:</b>                       |                                       |                                     | <b>1.4</b>                                                                         |
| <b>Signaling Induction of pSTAT5 by TPO:</b> |                                       |                                     | <b>4.5 – 1.4 = 3.1</b>                                                             |

Arcsinh vs. fold-change:

| Unstimulated Intensity | Stimulated Intensity | Fold Change | Arcsinh difference (calculated above) |
|------------------------|----------------------|-------------|---------------------------------------|
| 5                      | 10                   | 2           | 0.6                                   |
| 5                      | 25                   | 5           | 1.4                                   |
| 5                      | 50                   | 10          | 2.1                                   |
| 5                      | 250                  | 50          | 3.7                                   |
| 5                      | 500                  | 100         | 4.4                                   |

Statistical analysis of signaling responses in manually gated bone marrow was performed as follows: For each experimental condition, the arcsinh-transformed median intensity of each of 18 intracellular antibodies was compared to the distribution of the arcsinh-transformed median intensities of unstimulated replicates ( $n=5$ ) in each of 24 manually gated cell populations (resulting in a total of 432 observations per condition). Independent one-sample  $t$ -tests were performed with 4 degrees of freedom and  $p$ -values were adjusted for 432 multiple comparisons (Bonferroni). All signaling responses with adjusted  $p$ -values below 0.05 are listed in Table S3.

**SPADE analysis and tree construction.** Given an FCS file as input, SPADE first performs a density-dependent down-sampling step based on  $n$  parameters specified by the user. This step heavily down-samples dense populations corresponding to abundant cell types while preserving rare cell types with relatively sparse distributions. The resulting dataset is density-normalized, but retains the multidimensional structure of the original FCS file. Using the density-normalized dataset, rare and abundant cell types are equally likely to form clusters in the subsequent clustering step. After down-sampling, an unsupervised agglomerative hierarchical clustering step consolidates down-sampled cells into clusters of phenotypically similar cells based on  $n$  parameters. SPADE then

connects the centroids of the cell clusters using a minimum spanning tree (MST) (7). The topology of this tree representation reveals the underlying relationship and similarity of cell nodes in  $n$  dimensional space. All stimulated BM and PBMC mass cytometry datasets were singlet-gated in Cytobank, exported as FCS files and imported into SPADE for analysis. SPADE analysis was performed with the default configuration (arcsinh cofactor = 5, normalization = OFF, down-sampling scaling factor = 5, sparsity exclusion percentile = 1, target number of cells = 20000, max number of cells = 50000, target number of clusters = 200). Fifteen (15) 'static' parameters that were not expected to change between experimental conditions were used for down-sampling and tree construction: DNA (Ir191), Cell\_length, and the 13 'core' surface antibody parameters. All conditions from a single experiment were processed simultaneously so the resulting tree structure would capture all cell surface subpopulations present in the entire dataset. To reduce the effect of counting error, the  $n$  dimensional coordinates of each node were then used to up-sample the data from the original FCS file, thereby populating each node with every cell from the original FCS file that shares the phenotype with the cells in the node. Here, for each cell in the original data file we computed the distance to every individual cell in the pooled down-sampled dataset from which the tree was constructed (L1 distance based on the 13 surface markers). Then, based on which one was its nearest neighbor (NN), the cell in the original file was assigned to the same cell cluster (tree node) as its downsampled NN. The same approach was used to overlay the results of the 'immunophenotype' staining panel on the tree constructed from the 29 conditions with the 'functional' panel. The set of 13 'core' surface markers, which were shared between the two staining panels, allowed assignment of the 'immunophenotype' cells to the tree. These cells were used to compute the median intensities of the complementary 18 surface antigens shown in Fig. 2 and S4B. For cellular signaling response calculations, the median arcsinh intensity of up-sampled cells within each node (i.e. cluster) for each original FCS file (i.e. each experimental condition) was used for signaling induction calculations and visualizations. See above example table for archsinh calculations.

**Principal component analysis (PCA) of phenotypic progression:** We identified two subsets of cells involved in B-cell development. One subset included HSC, MPP, Pro-B cells and early Pre-B cells. The other included late Pre-B cells, Immature B-cells, Naïve Mature B-cells and IL3RA+ Mature B-cells. For each subset, we ran PCA(8) over the cell surface markers, and examined the coefficients of the first principal component. For the first subset (Fig. 4), the first component explained 22.8% of the variation in the data; the three highest coefficients for this component were CD38 (-0.67), CD20 (0.5) and CD45RA

(0.38). For the second subset (Fig. 5D), the first component explained 23.9% of the variation in the data; the three highest coefficients for this component were CD19 (0.55), CD33 (-0.54) and CD34 (-0.51). For each cell, we defined the progression value as the projection of the cell markers values on to the first principal component. In each subset, we divided the cells to 17 overlapping windows according to their progression values. The windows were in equal distances across the progression trajectory, had width of 20%, and 75% overlap between consecutive windows. Notably, the plots remain smooth even if no overlapping windows are used. For each marker, the mean in each window was used to plot the progressions in Fig. 4 and 5.

**Public data distribution:** For replicate human bone marrow samples analyzed here, single-cell gated FCS files are publicly available on [www.cytobank.org](http://www.cytobank.org) for download.

**Methods Table 1.** Molecules used for stimulation and inhibition of biochemical responses in human PBMCs and bone marrow. All cytokines are the human sequence.

| Short name | Stimulation/Inhibitor                           | Final Concentration                             | Supplier                                    |
|------------|-------------------------------------------------|-------------------------------------------------|---------------------------------------------|
| BCR        | Goat anti-human IgG (BCR cross-linking)         | 10 µg/mL                                        | Southern Biotech, Birmingham AL             |
|            | Goat anti-human IgM (BCR cross-linking)         | 10 µg/mL                                        | Southern Biotech, Birmingham AL             |
|            | Goat F(ab)2 anti-human Ig κ (BCR cross-linking) | 10 µg/mL                                        | Southern Biotech, Birmingham AL             |
|            | Goat F(ab)2 anti-human Ig λ (BCR cross-linking) | 10 µg/mL                                        | Southern Biotech, Birmingham AL             |
| Flt3L      | Flt-3 Ligand                                    | 50 ng/mL                                        | PeprTech, Rocky Hill, NJ                    |
| IL-2       | IL-2                                            | 100 ng/mL                                       | PeprTech, Rocky Hill, NJ                    |
| IL-3       | IL-3                                            | 20 ng/mL                                        | PeprTech, Rocky Hill, NJ                    |
| IL-6       | IL-6                                            | 100 ng/mL                                       | BD Biosciences, San Jose, CA                |
| IL-7       | IL-7                                            | 20 ng/mL                                        | BD Biosciences, San Jose, CA                |
| IL-10      | IL-10                                           | 100 ng/mL                                       | PeprTech, Rocky Hill, NJ                    |
| LPS        | LPS (Ultrapure)                                 | 1 µg/mL                                         | Invitrogen, Carlsbad, CA                    |
| G-CSF      | G-CSF                                           | 20 ng/mL                                        | PeprTech, Rocky Hill, NJ                    |
| GM-CSF     | GM-CSF                                          | 20 ng/mL                                        | PeprTech, Rocky Hill, NJ                    |
| IFNα       | IFNα                                            | 5000 U/mL                                       | PeprTech, Rocky Hill, NJ                    |
| IFNα       | IFNα/AD (Cat. #11200-1)                         | 5000 U/mL                                       | PBL InterferonSource, Piscataway, NJ        |
| PMA/Iono.  | PMA                                             | 50 nM                                           | Sigma-Aldrich, St. Louis, MO, St. Louis, MO |
|            | Ionomycin                                       | 1 µg/mL                                         | Sigma-Aldrich, St. Louis, MO, St. Louis, MO |
| PVO4       | Pervanadate (Sodium orthovanadate)              | 125 µM in 0.53 mM H <sub>2</sub> O <sub>2</sub> | Calbiochem, San Diego, CA                   |

|              |                 |            |                            |
|--------------|-----------------|------------|----------------------------|
| SCF          | SCF             | 100 ng/mL  | PeptoTech, Rocky Hill, NJ  |
| TNF $\alpha$ | TNF $\alpha$    | 20 ng/mL   | PeptoTech, Rocky Hill, NJ  |
| TPO          | TPO             | 50 ng/mL   | PeptoTech, Rocky Hill, NJ  |
| Dasatinib    | Dasatinib       | 100 nM     | LC Laboratories, Woburn MA |
| JAKi         | JAK Inhibitor I | 5 $\mu$ M  | Calbiochem, San Diego, CA  |
| U0126        | U0126           | 20 $\mu$ M | Calbiochem, San Diego, CA  |

**Methods Table 2.** A summary of antibodies used for mass cytometry analysis. Also indicated is the staining panel the antibody was used in.

| Antigen Target (Human)         | Clone Number | Supplier                  | Elemental Isotope    | Final Concentration ( $\mu$ g/mL) | Immunophenotype Panel 1 | Functional Panel 2 |
|--------------------------------|--------------|---------------------------|----------------------|-----------------------------------|-------------------------|--------------------|
| CD10                           | HI10a        | Biolegend                 | Gd156                | 3                                 | X                       |                    |
| CD117                          | 104D2        | Biolegend                 | Yb171                | 1                                 | X                       |                    |
| CD11b                          | ICRF44       | Biolegend                 | Nd144                | 3                                 | X                       | X                  |
| CD11c                          | 3.9          | Biolegend                 | Sm154                | 5                                 | X                       |                    |
| CD123                          | 9f5          | BD Biosciences            | Eu151, Gd160         | 1                                 | X                       | X                  |
| CD13                           | L138         | BD Biosciences            | Er168                | 1                                 | X                       |                    |
| CD14                           | M5E2         | Biolegend                 | Gd160                | 2                                 | X                       |                    |
| CD15                           | W6D3         | Biolegend                 | Dy164                | 1                                 | X                       |                    |
| CD16                           | 3G8          | Biolegend                 | Ho165                | 2                                 | X                       |                    |
| CD161                          | HP-3G10      | Biolegend                 | Nd150                | 5                                 | X                       |                    |
| CD19                           | H1B19        | BD Biosciences            | Nd142                | 1.5                               | X                       | X                  |
| CD20                           | 2H7          | BD Biosciences            | Sm147                | 3                                 | X                       | X                  |
| CD235a/b                       | HIR2         | Biolegend                 | Pr141                | 2                                 | X                       |                    |
| CD3                            | UCHT1        | Biolegend                 | Pr141                | 3                                 | X                       |                    |
| CD3 Qdot 655                   | S4.1         | Invitrogen                | Cd110, 111, 112, 114 | 1:500 dilution                    |                         | X                  |
| CD33                           | WM53         | Biolegend                 | Nd148, Gd158         | 1.5                               | X                       | X                  |
| CD34                           | 8G12         | BD Biosciences            | Nd148                | 3                                 | X                       | X                  |
| CD38                           | HIT2         | Biolegend                 | Tb159, Er167         | 1                                 | X                       | X                  |
| CD4                            | RPA-T4       | Biolegend                 | Nd145                | 3                                 | X                       | X                  |
| CD41                           | HIP8         | Biolegend                 | Sm152                | 1                                 | X                       |                    |
| CD44                           | G44-26       | BD Biosciences            | Er166                | 1                                 | X                       |                    |
| CD45                           | HI30         | Biolegend                 | In115                | 2                                 | X                       | X                  |
| CD45RA                         | HI100        | Biolegend                 | La139                | 3                                 | X                       | X                  |
| CD47                           | B6H12        | BD Biosciences            | Yb172                | 2                                 | X                       |                    |
| CD56                           | B159         | BD Biosciences            | Er170                | 2                                 | X                       |                    |
| CD56                           | HCD56        | Biolegend                 | Er170                | 2                                 | Fig. 1 Comparison       |                    |
| CD61                           | VI-PL2       | BD Biosciences            | TM169                | 0.25                              | X                       |                    |
| CD7                            | M-T701       | BD Biosciences            | Er167                | 2                                 | X                       |                    |
| CD8a                           | RPA-T8       | Biolegend                 | Nd146                | 1.5                               | X                       | X                  |
| CD90                           | 5E10         | Biolegend                 | Er170, Yb176         | 5                                 | X                       | X                  |
| CXCR4                          | 12G5         | Biolegend                 | Lu175                | 3                                 | X                       |                    |
| HLADR                          | L243         | Biolegend                 | Yb174                | 2                                 | X                       |                    |
| IgM                            | G20-127      | BD Biosciences            | Eu153, Dy164         | 2                                 | X                       |                    |
| I $\kappa$ B alpha             | L35A5        | Cell Signaling Technology | Er166                | 2                                 |                         | X                  |
| Ki67                           | B56          | BD Biosciences            | Sm152                | 2                                 |                         | X                  |
| Btk/I $\kappa$ k (pY551/pY511) | 24a/BTK      | BD Biosciences            | Gd158, Yb171         | 2                                 |                         | X                  |
| Creb (pS133)                   | 87G3         | Cell Signaling Technology | Yb176                | 1.5                               |                         | X                  |
| CrkL (pY207)                   | polyclonal   | Cell Signaling Technology | Lu175                | 2                                 |                         | X                  |
| Erk1/2 (pT202/pY204)           | 20A          | BD Biosciences            | Eu151                | 1                                 |                         | X                  |
| H3 (pS28)                      | HTA28        | Biolegend                 | Er168                | 0.5                               |                         | X                  |
| MAPKAPK 2 (pT334)              | 27B7         | Cell Signaling Technology | Eu153                | 1                                 |                         | X                  |

|                         |                |                           |              |   |  |   |
|-------------------------|----------------|---------------------------|--------------|---|--|---|
| NfκB (pS536)            | K10-895.12.50  | BD Biosciences            | Ho165        | 1 |  | X |
| p38 (pT180/pY182)       | 36/p38         | BD Biosciences            | TM169        | 2 |  | X |
| PLCg2 (pY759)           | K86-689.37     | BD Biosciences            | Pr141        | 2 |  | X |
| S6 (pS235/pS236)        | N7-548         | BD Biosciences            | Yb172        | 2 |  | X |
| Shp2 (pY580)            | polyclonal     | Cell Signaling Technology | Sm154        | 2 |  | X |
| SLP-76 (BLNK) (pY128)   | J141-668.36.58 | BD Biosciences            | Gd160, Dy164 | 1 |  | X |
| Src (pY418)             | K98-37         | BD Biosciences            | Yb174        | 2 |  | X |
| STAT3 (pY705)           | 4/P-STAT3      | BD Biosciences            | Tb159        | 2 |  | X |
| STAT5 (pY694)           | 47             | BD Biosciences            | Nd150        | 2 |  | X |
| ZAP70/Syk (pY319/pY352) | 17a            | BD Biosciences            | Gd156        | 1 |  | X |

### Supplementary References:

1. P. O. Krutzik, G. P. Nolan, *Cytometry A* **55**, 61 (Oct, 2003).
2. O. I. Ornatsky *et al.*, *Anal Chem* **80**, 2539 (Apr 1, 2008).
3. D. R. Bandura *et al.*, *Anal Chem* **81**, 6813 (Aug 15, 2009).
4. O. Ornatsky *et al.*, *J Immunol Methods*, (Jul 21).
5. F. Hahne *et al.*, *BMC Bioinformatics* **10**, 106 (2009).
6. N. Kotecha, P. O. Krutzik, J. M. Irish, *Curr Protoc Cytom Chapter 10*, Unit10 17 (Jul).
7. Y. Xu, V. Olman, D. Xu, *Bioinformatics* **18**, 536 (Apr, 2002).
8. I. T. Jolliffe, *Principal component analysis*. . (Springer, New York, 2002).

## Supplemental Figure Legends:

### Figure S1 – Comparison of mass and fluorescence cytometry profiling of immune cell response patterns in two PBMC samples.

(A–B) Representative antibody surface staining results and cell population definitions (“gating”) for fluorescence (A) and mass (B) cytometry analysis of fixed PBMCs from Donor A. Identical analysis of Donor B is shown in Fig. 1B and 1C of the main text. \*Pearson correlation between frequencies measured by fluorescence or mass cytometry, including both donors ( $r = 0.99$ ,  $p < 0.000001$ , two-tailed  $t$ -test) as shown in Table S1 and (C).

(C) Linear regression of paired frequencies measured by fluorescence or mass cytometry. Data includes frequencies of 12 populations from each of 2 donors ( $r = 0.99$ ,  $p < 0.000001$ , two-tailed  $t$ -test) (Table S1).

(D) Heatmap summary of induced STAT phosphorylation in immune populations from PBMC Donor A. Immune populations are defined in (A) and (B) (*column headers refer to blue polygons in (A) and (B)*). Responses to the indicated stimuli in each row were measured by fluorescence (*top*) and mass (*bottom*) cytometry. Color scale indicates the difference in  $\log_2$  mean intensity of the stimulated condition compared to the unstimulated control. Signaling responses of Donor B are shown in Fig. 1E of the main text. \*\*Pearson correlation between signaling induction measured by fluorescence or mass cytometry, including both donors (pSTAT3:  $r = 0.92$ ;  $p < 0.000001$ , two-tailed  $t$ -test; pSTAT5:  $r = 0.89$ ,  $p < 0.000001$ , two-tailed  $t$ -test) as shown in (E) and (F).

(E) Linear regression of paired pSTAT3 signaling induction values calculated from intensities measured by fluorescence or mass cytometry. Data includes signaling intensities of 45 unique combinations of populations and stimuli (9 populations x 5 stimuli) from each of 2 donors ( $r = 0.92$ ;  $p < 0.000001$ , two-tailed  $t$ -test).

(F) Linear regression of paired pSTAT5 signaling induction values calculated from intensities measured by fluorescence or mass cytometry. Data includes signaling intensities of 45 unique combinations of populations and stimuli (9 populations x 5 stimuli) from each of 2 donors ( $r = 0.89$ ;  $p < 0.000001$ , two-tailed  $t$ -test).

### Figure S2 – Justification for Arcsinh transformation of display scale in mass cytometry analysis.

CD4 and CD8 expression as measured by mass (top) and fluorescence (bottom) cytometry for T cells as gated in Fig. 1B and C of the main text. Shown is the same data on a linear scale as well as on arcsinh scales with a scaling

argument of 150, 5, or 1 in Cytobank software. The  $\log_{10}$  scales displayed are compressed according to the arcsinh transformation. An arcsinh scaling factor of 150 works well for digital fluorescence data while an augment of 5 works well for mass cytometry data. Both of these are default on cytobank.org.

**Figure S3 – High dimensional single-cell surface analysis is difficult to display in a 2-dimensional space with dot plots.**

A summary of possible 2-parameter dot plots for a 31-parameter cell surface immunophenotype of healthy human bone marrow obtained using mass cytometry.

**Figure S4 – Expression of immunophenotype surface markers overlaid onto the SPADE plots of healthy human bone marrow.**

(A) The expression of the 13 core surface markers used to construct the SPADE MST in Fig. 2 of the main text.

(B) The expression of an additional 18 surface markers from the grafted 31 surface marker analysis of the same sample. These 18 surface markers were not used in the SPADE plot and their localized expression is based solely on the shared expression patterns of the 13 core surface markers.

**Figure S5 – Manual gating strategy for healthy human bone marrow using traditional 2D cytometry analysis methods.**

The gating hierarchy is shown for 24 manually gated cell populations in used in the heatmaps of Fig. 3 and 5 of the main text. All gates were applied with Boolean “AND” logic in Cytobank software. Therefore, each cell population is defined by the combination of gates in its respective row.

**Figure S6 – Hierarchically clustered heatmap of intracellular functional marker dynamics induced by 13 biological and chemical stimuli.**

Single-cell data from healthy human bone marrow was divided into 24 traditionally gated cell populations, and hierarchically clustered based on signaling induction and cell population. Each row in the heatmap represents the phosphorylation level of one phospho-protein in response to one stimulation condition.

**Figure S7 – Venn diagram of statistically significant signaling responses among manually gated bone marrow populations from two donors.**

Independent one-sample *t*-tests (see Experimental Procedures) were performed to identify statistically significant signaling responses for each of 22 unique experimental conditions in bone marrow samples from each of 2 healthy

donors. The effect of each experimental condition was measured using 18 intracellular markers in 24 manually gated cell populations, for a total of 432 signaling responses per condition. After correction for multiple comparisons, an average of 554 significant signaling responses were observed for each donor, of which 248 were significant for both (45% concordance). All 1,108 significant signaling responses are listed in Table S3.

**Figure S8 – A comprehensive summary of dynamics of 18 intracellular functional markers in a healthy human bone marrow sample, overlaid on SPADE plots.**

(A) Induced changes in 18 functional markers by 13 *ex vivo* stimuli were overlaid onto the SPADE MST using the 13 core surface markers as anchors.

(B) A subset of 6 conditions (Unstimulated, BCR, IL-7, Flt3L, PMA/Ionomycin., PVO<sub>4</sub>) are shown after 30 minutes pretreatment with 0.1 μM dasatinib.

(C) A subset of 2 conditions (Unstimulated, GCSF) are shown after 30 minutes pretreatment with 5 μM JAK inhibitor I. Signaling induction was calculated as the difference of arcsinh medians of the indicated *ex vivo* stimuli compared to the unstimulated control for each node.

**Figure S9 – Confirmatory analysis of a second healthy human bone marrow.**

A comprehensive summary of 18 intracellular functional markers and 13 extracellular markers in a second healthy human bone marrow sample.

(A) Induced changes in 18 functional markers by 13 *ex vivo* stimuli were overlaid onto the SPADE MST using the 13 core surface markers as anchors. Signaling induction was calculated as the difference of arcsinh medians of the indicated *ex vivo* stimuli compared to the unstimulated control for each node.

(B) A subset of 6 conditions (Unstimulated, BCR, IL-7, Flt3L, PMA/Ionomycin, PVO<sub>4</sub>) are shown after 30 minutes pretreatment with 0.1 μM dasatinib. Calculated as in (A).

(C) A subset of 2 conditions (Unstimulated, GCSF) are shown after 30 minutes pretreatment with 5 μM JAK inhibitor I. Calculated as in (A).

(D) A subset of 2 conditions (Unstimulated, PMA/Ionomycin) are shown after 30 minutes pretreatment with 20 μM U0126, an inhibitor of MEK. Calculated as in (A).

(E) The expression of the 13 core surface markers used to construct the SPADE MST in (A) through (D).

**Figure S10 – Signaling dynamics in response to the chemotherapeutic**



### **agent dasatinib.**

(A) Heatmap of the effect of dasatinib on intracellular signaling induction by five biological or chemical stimuli in 24 traditionally gated cell populations (Fig. S5). Suppression index was calculated as the signaling induction by the stimulus in the presence of dasatinib minus the induction by the stimulus alone.

(B) A complete spectrum of responses to dasatinib was observed. Induced signaling by pervanadate is shown with (Y-axis) and without (X-axis) dasatinib pre-treatment. Each data-point indicates induced phosphorylation of 18 functional markers (*colors*) in each of the 24 manually gated cell types. Suppression index is overlaid as the background of the plot. Points that fall along the white transition were unaffected by the presence of dasatinib. Points that fall to the lower right (*orange*) or to the upper left (*purple*) were suppressed or potentiated by dasatinib, respectively.

### **Figure S11 – Workflow diagram of optimization steps leading to final experimental design and published bone marrow dataset.**

The final set of antibodies and stimuli used in the bone marrow experiments were determined through an iterative process of testing and titrating individual reagents, combining panels of reagents, then revising those panels based on biological experiments. The steps to optimize different components of the final experimental design are shown (*blue* – surface antibodies; *orange* – intracellular antibodies; *red* – stimulation conditions; *green* – viability indicator).

### **Supplemental Tables:**

**Table S1** – A summary of gated cell population frequencies for comparison of fluorescence and mass cytometry in Fig. 1 of the main text.

**Table S2** – A summary of justifications for putative cell population assignments for the SPADE plot in Fig. 2 of the main text.

**Table S3** – Statistically significant signaling responses observed in bone marrow samples from either of two healthy donors.

# Figure S1

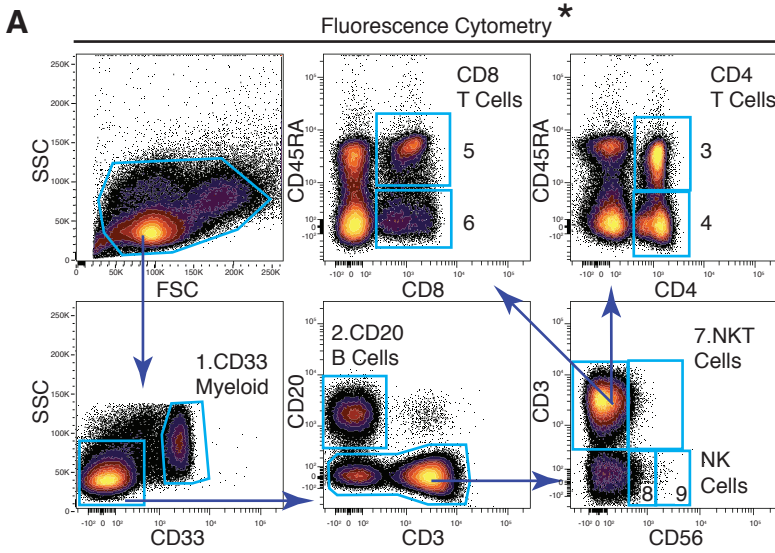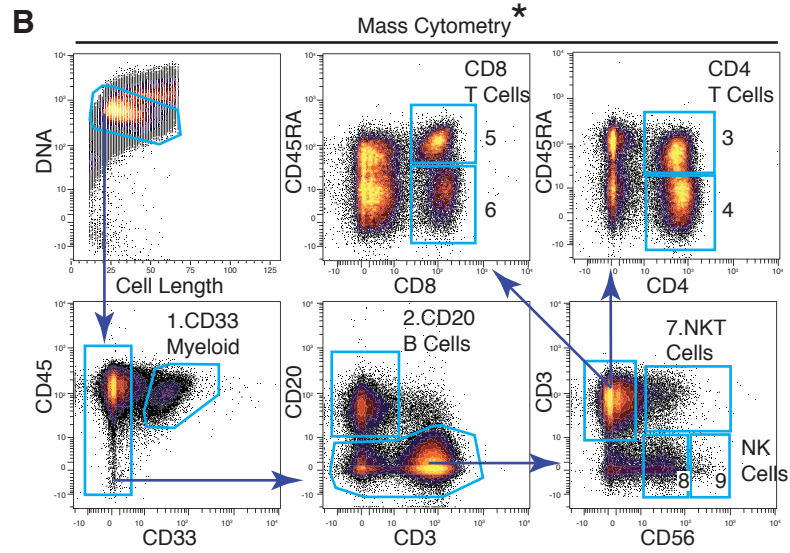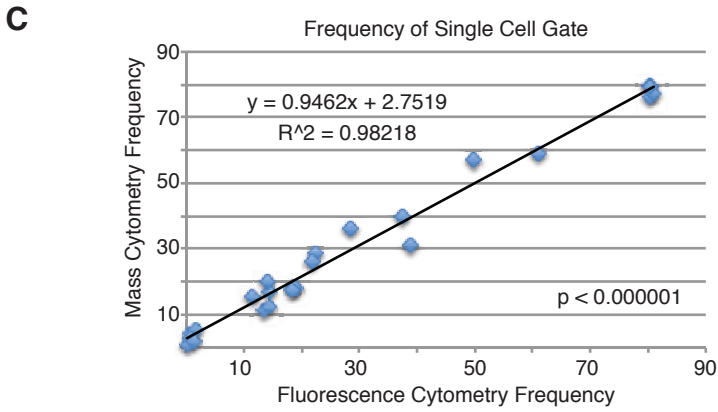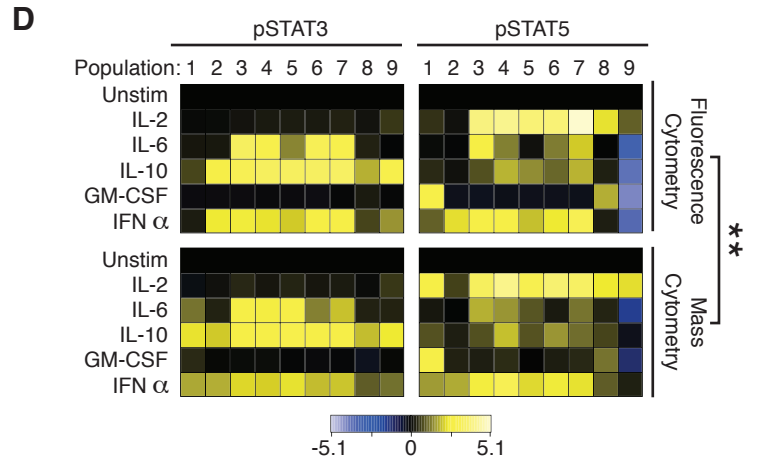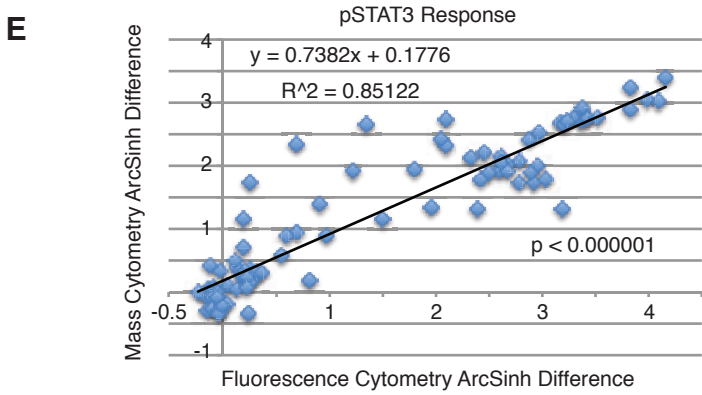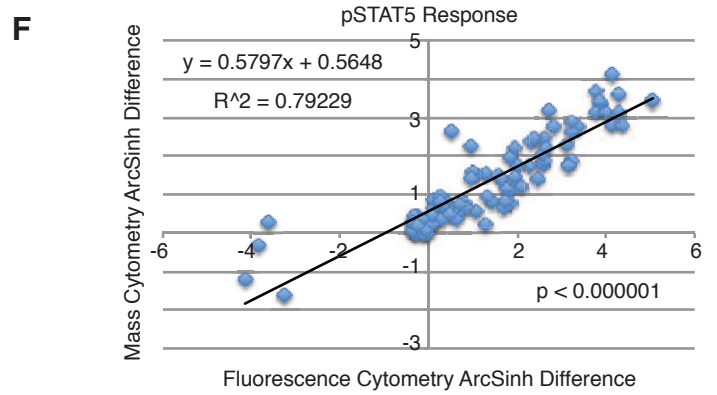

Figure S2

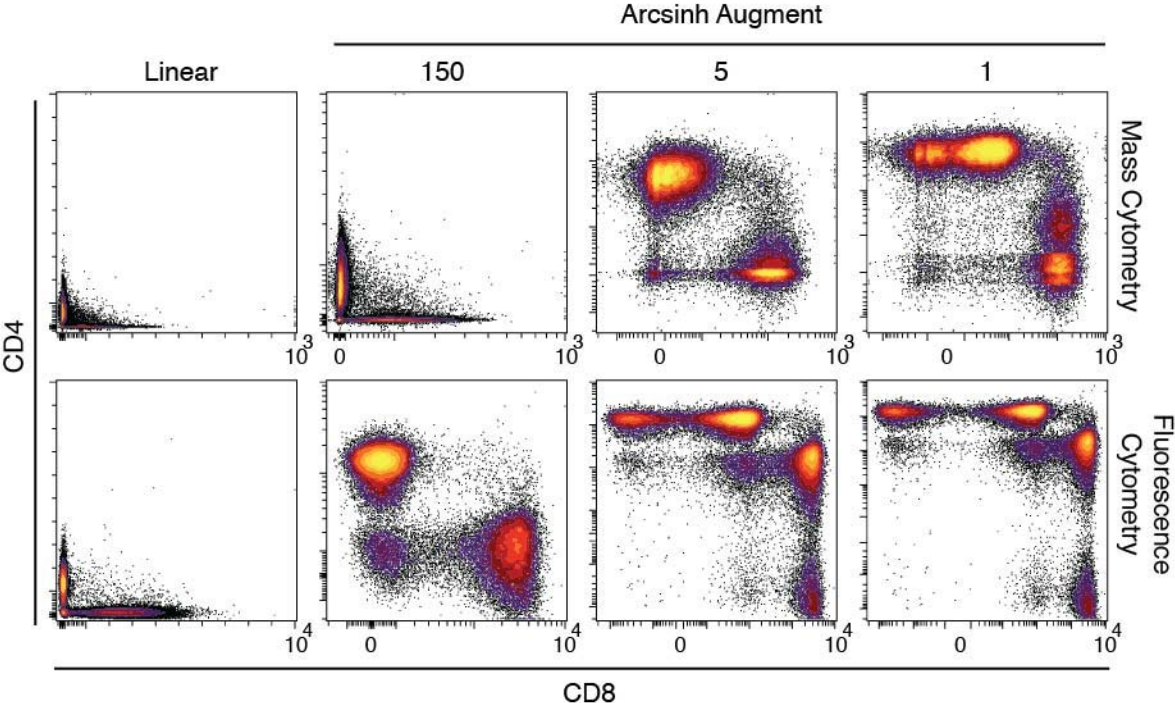

Figure S3

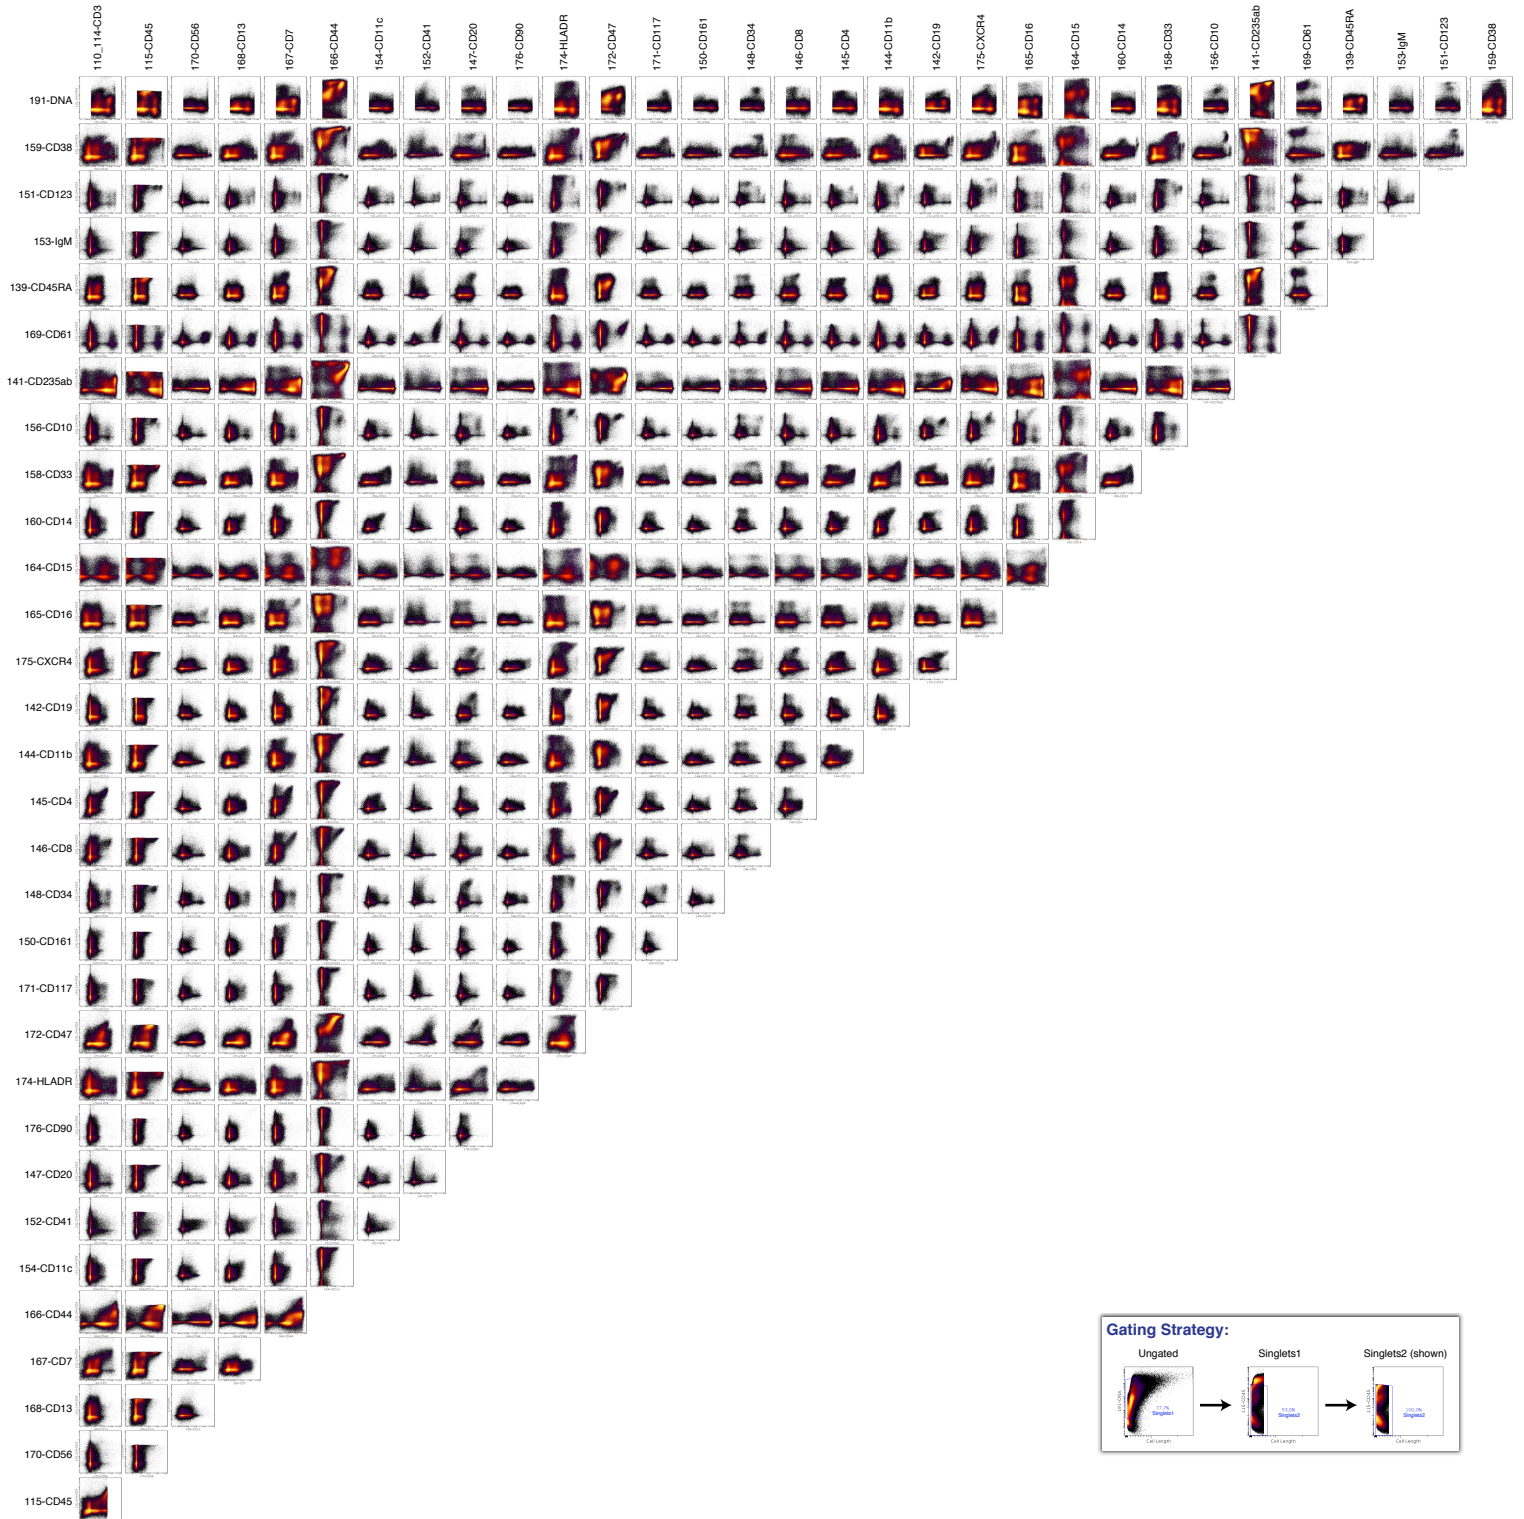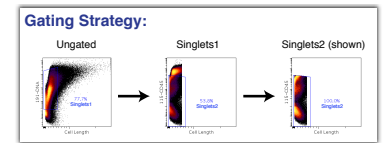

Figure S4A

110 114-CD3

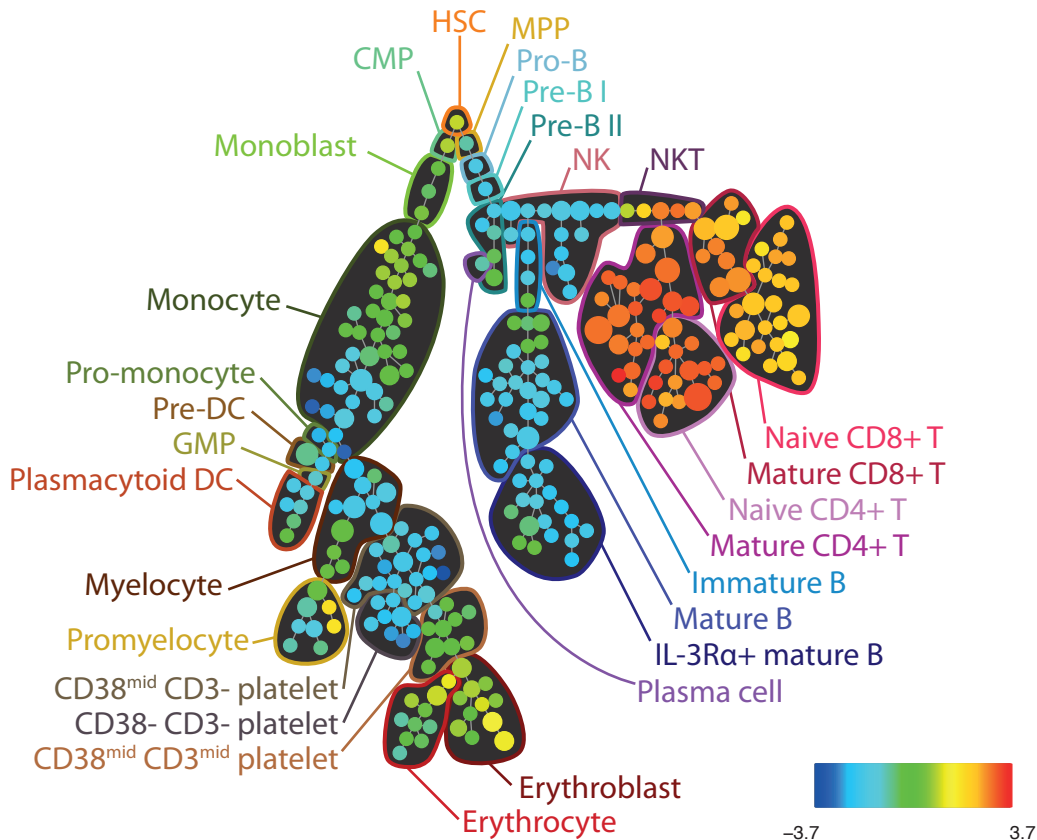

Figure S4A

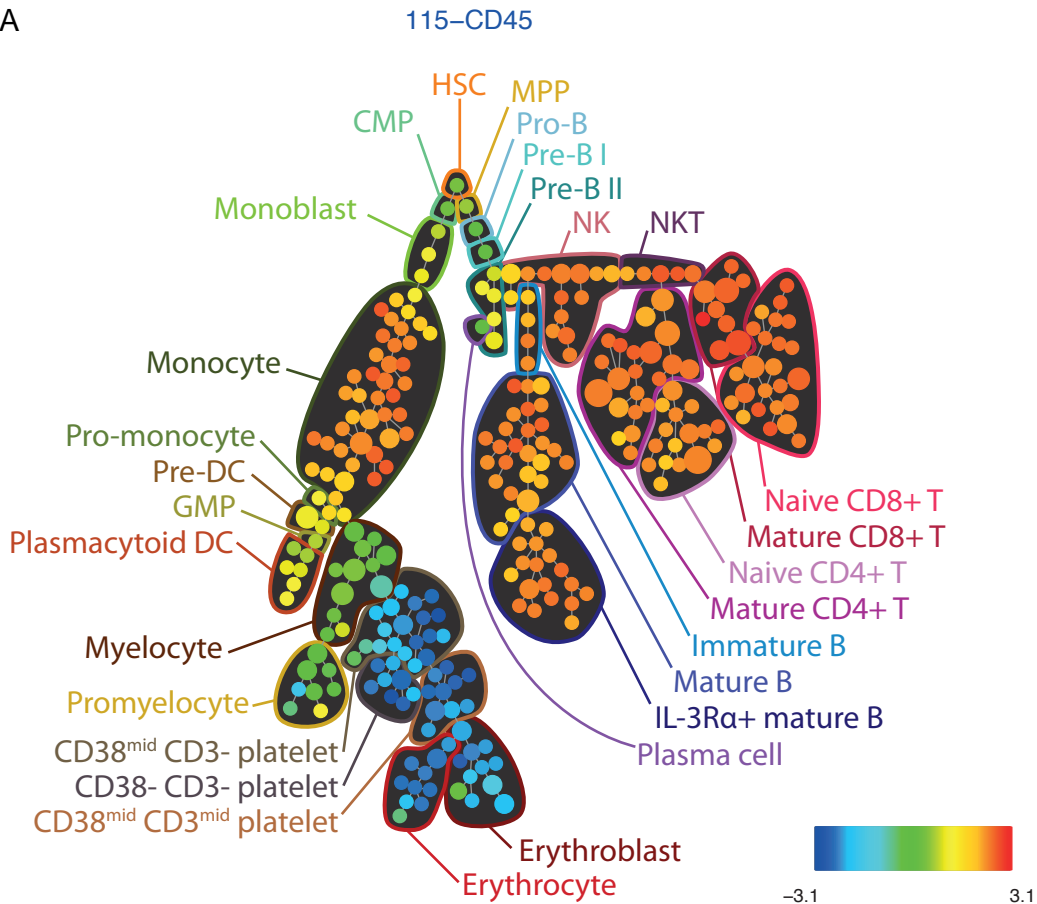



Figure S4A

139-CD45RA

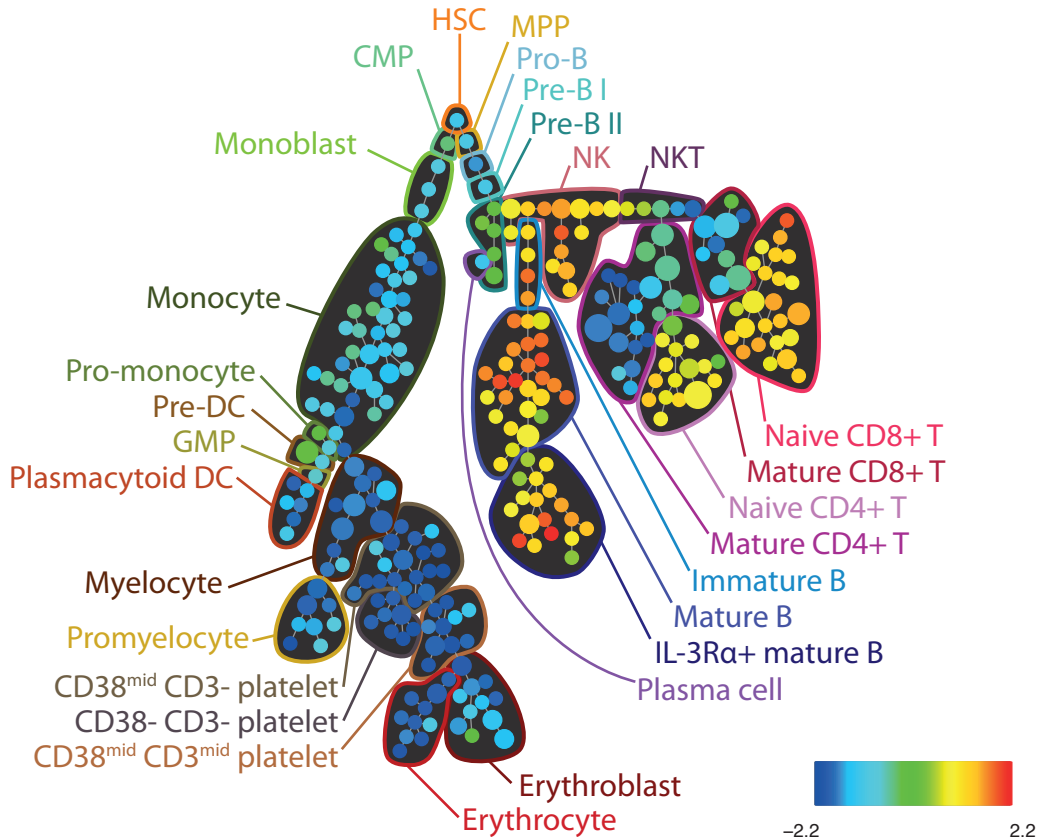

Figure S4A

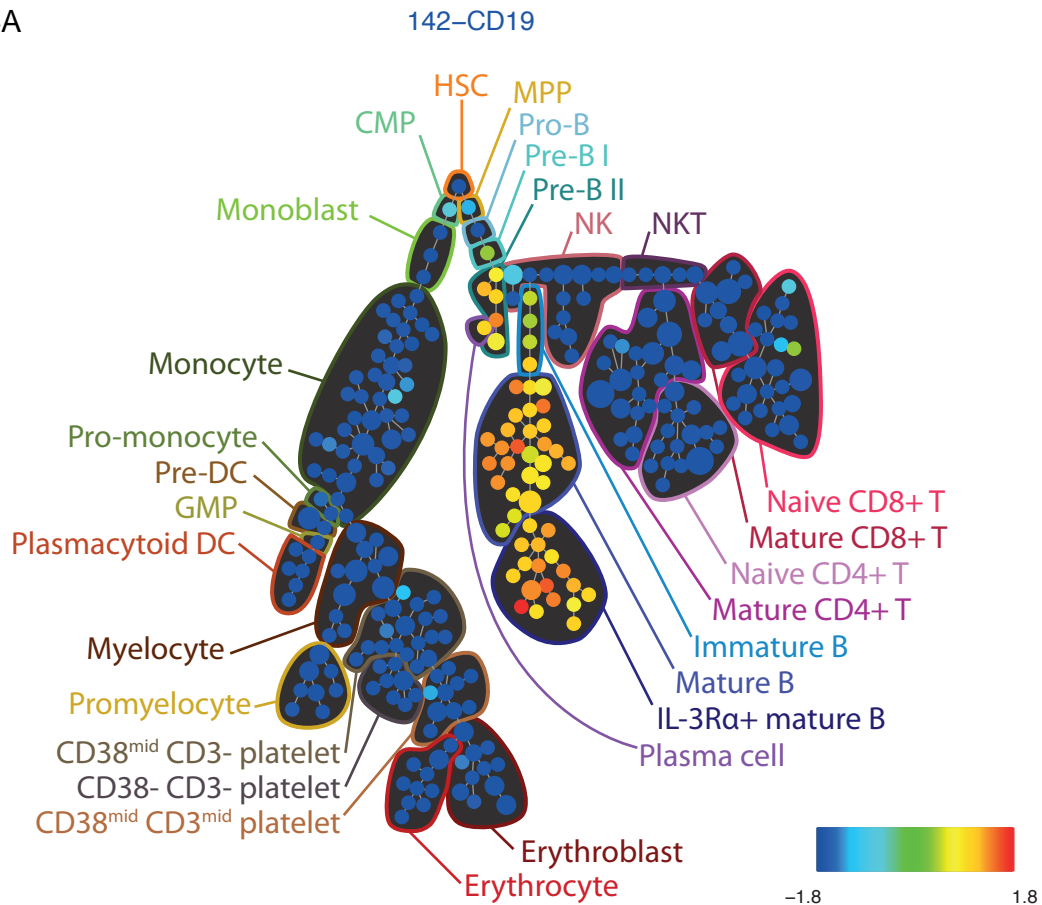



Figure S4A

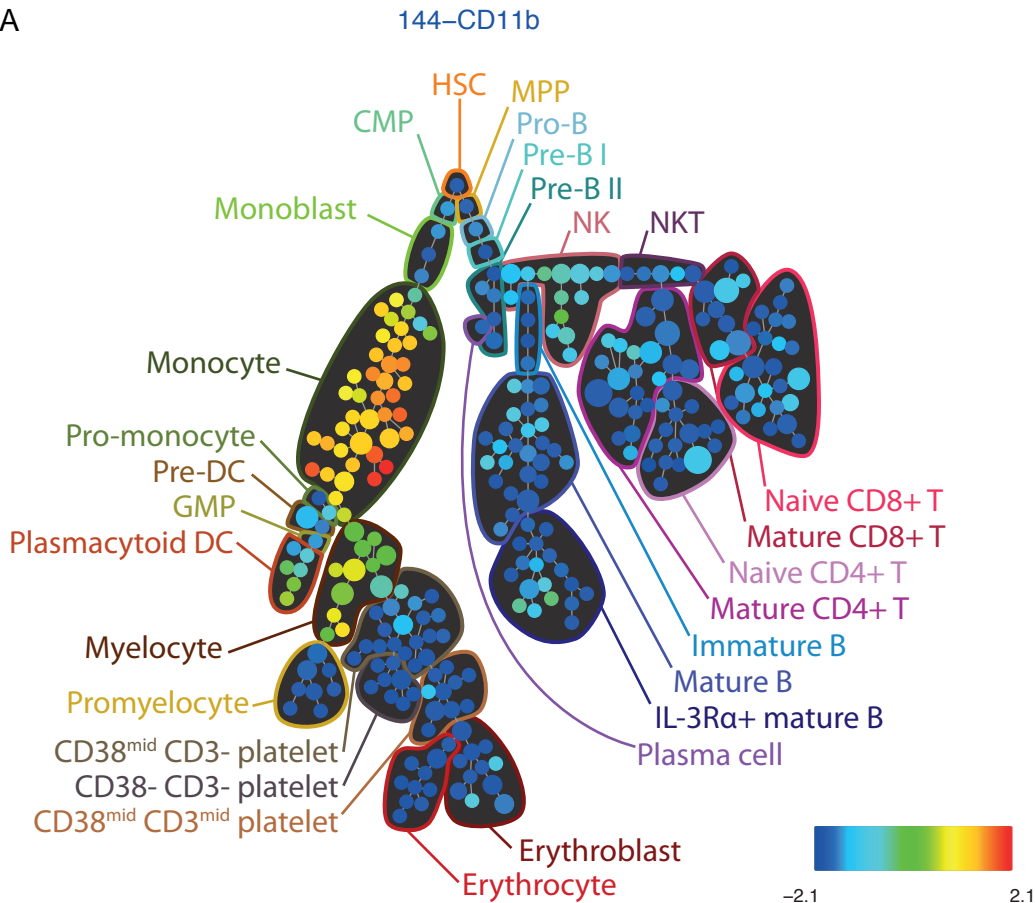

Figure S4A

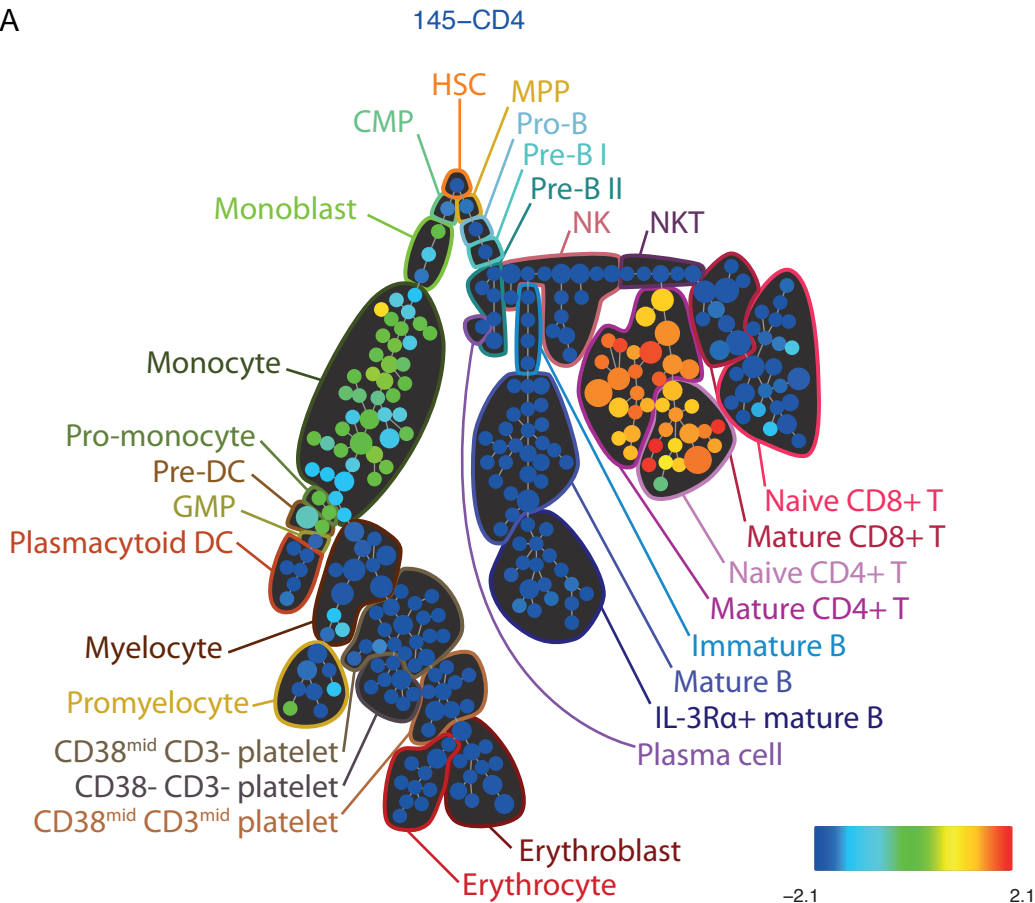

Figure S4A

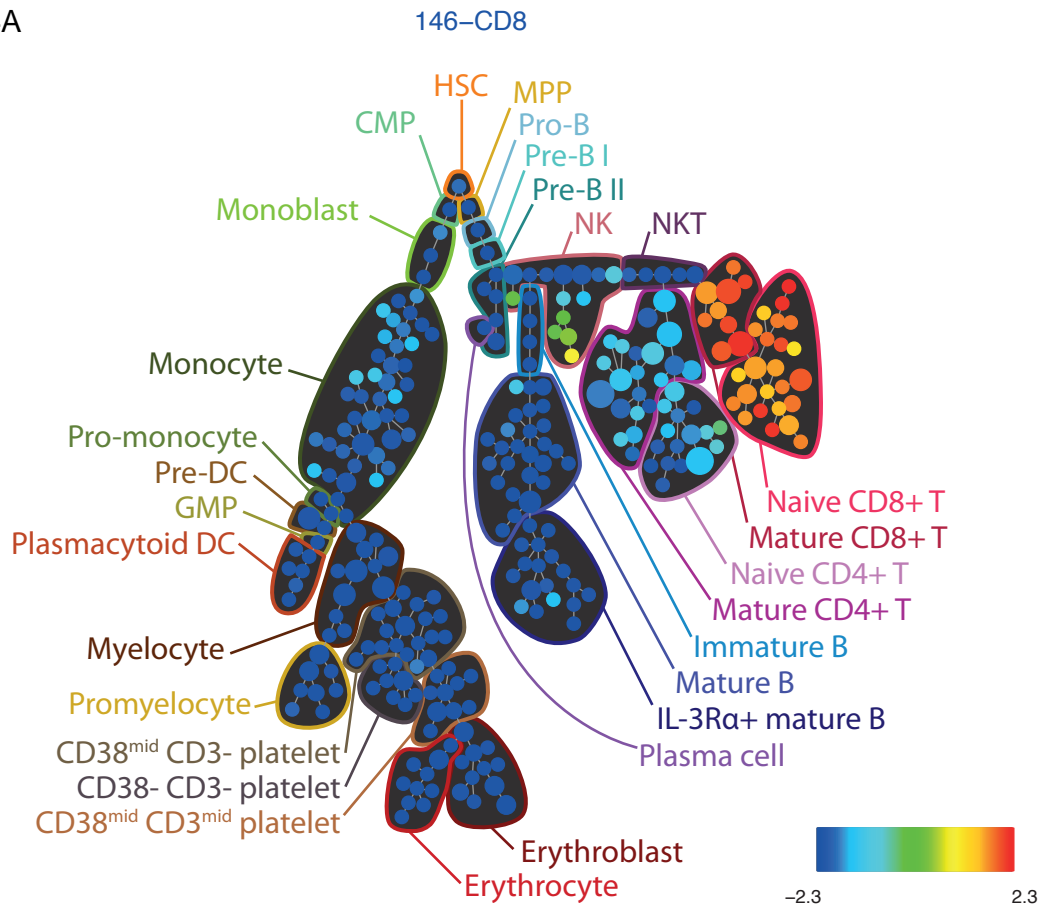

Figure S4A

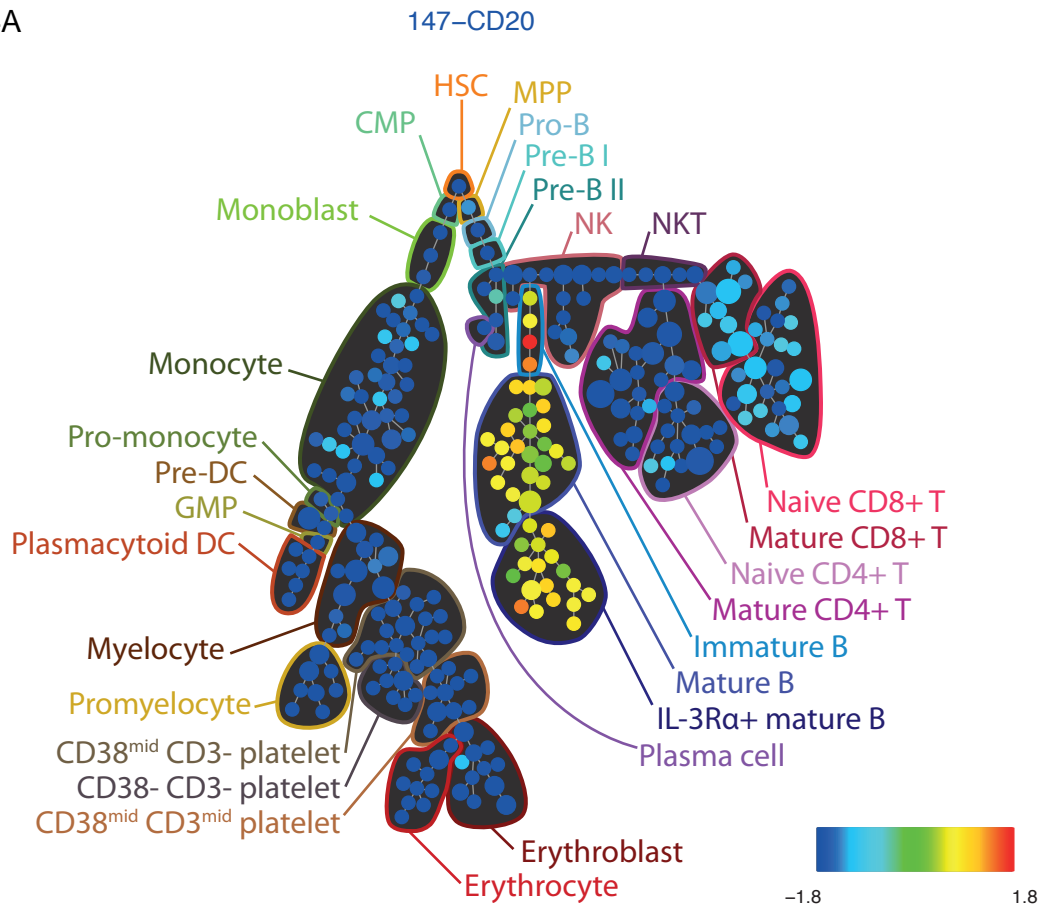

Figure S4A

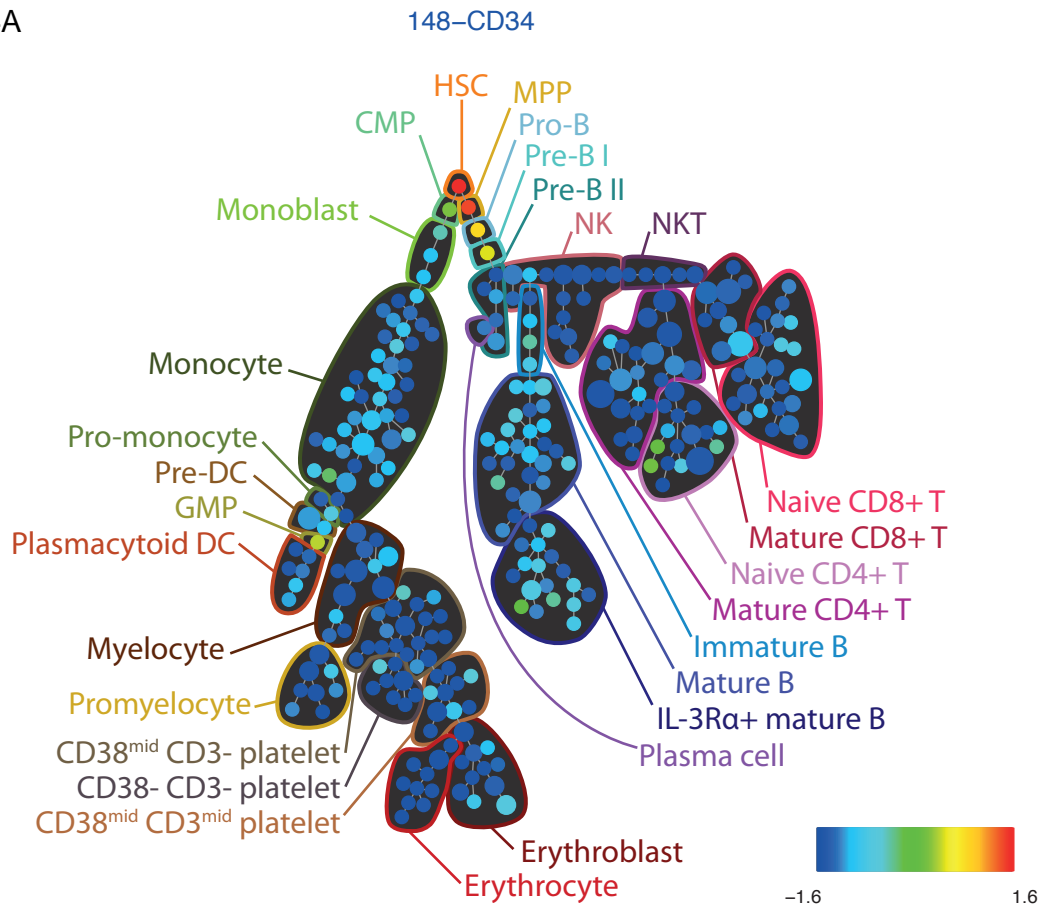

Figure S4A

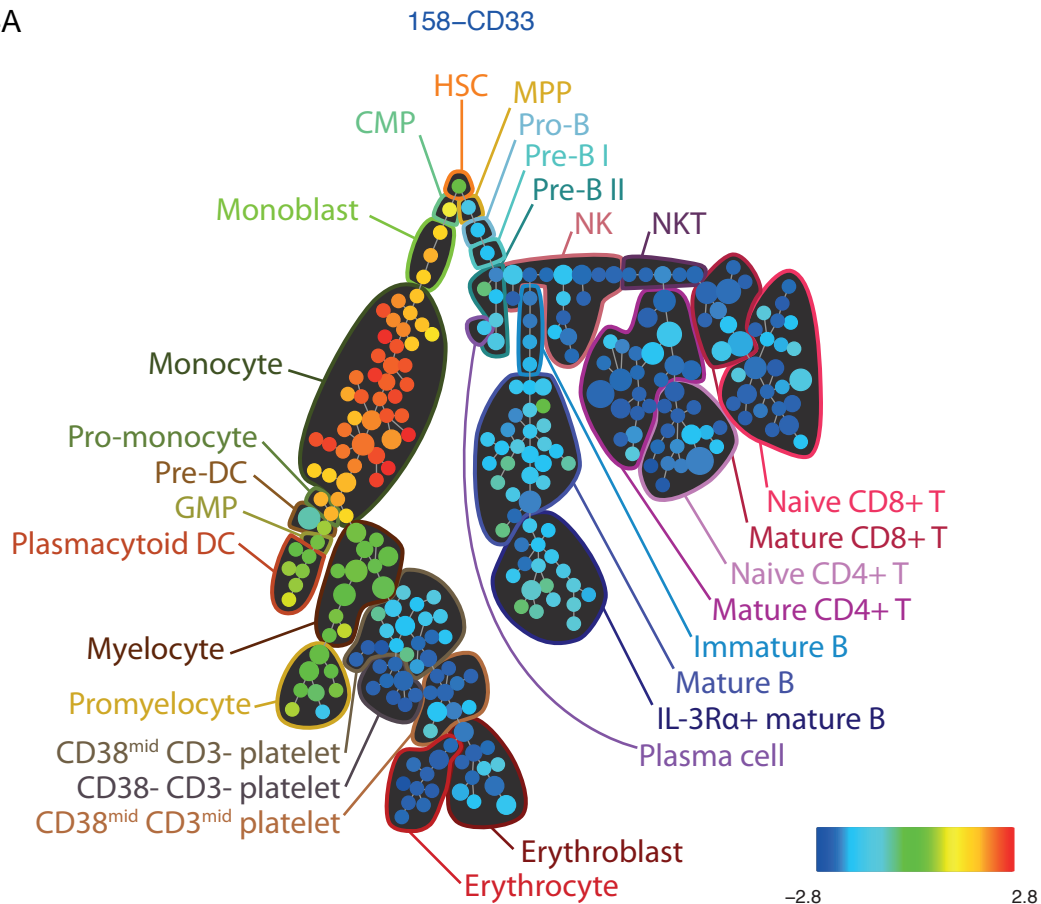

Figure S4A

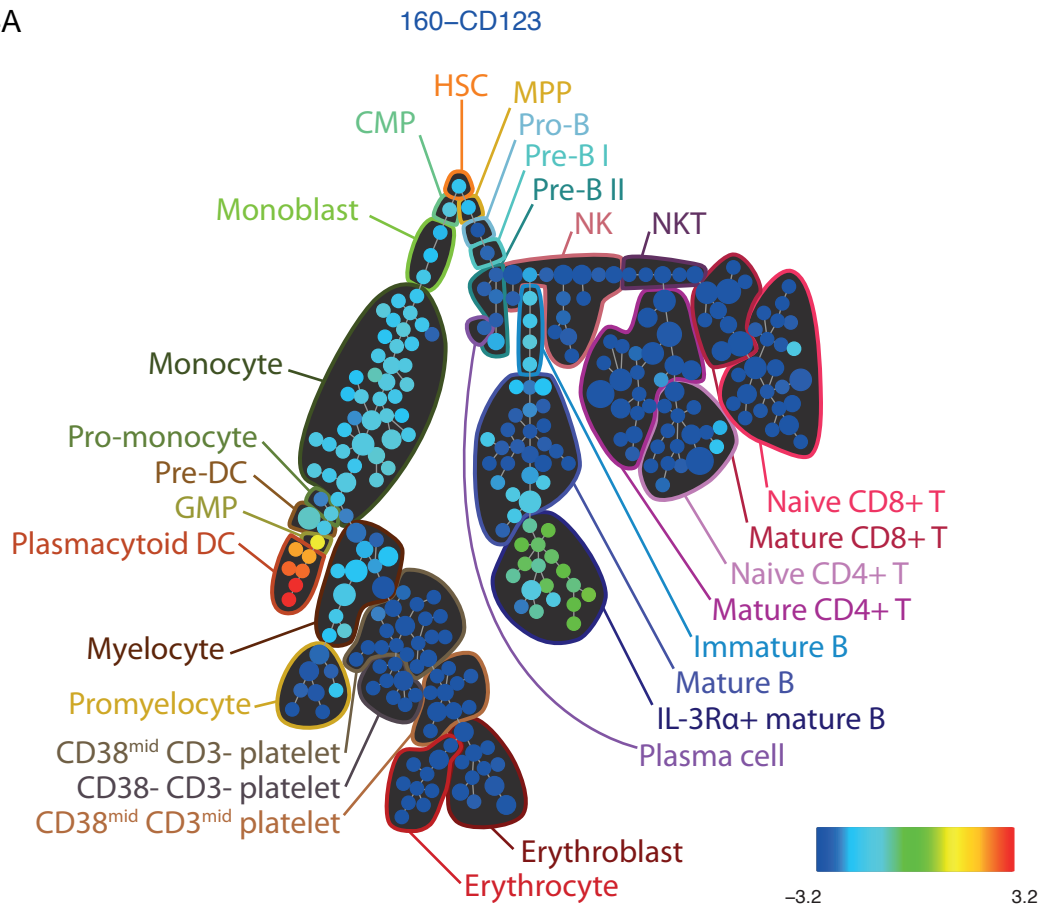

Figure S4A

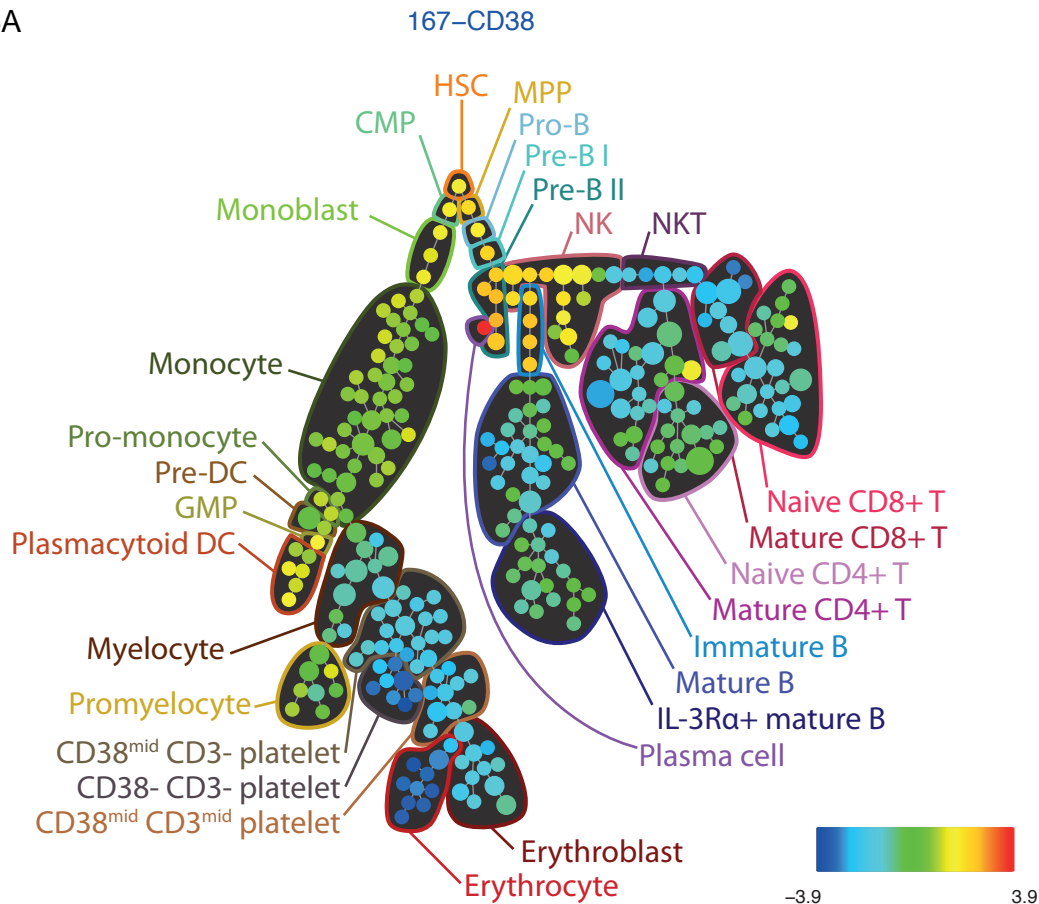



Figure S4A

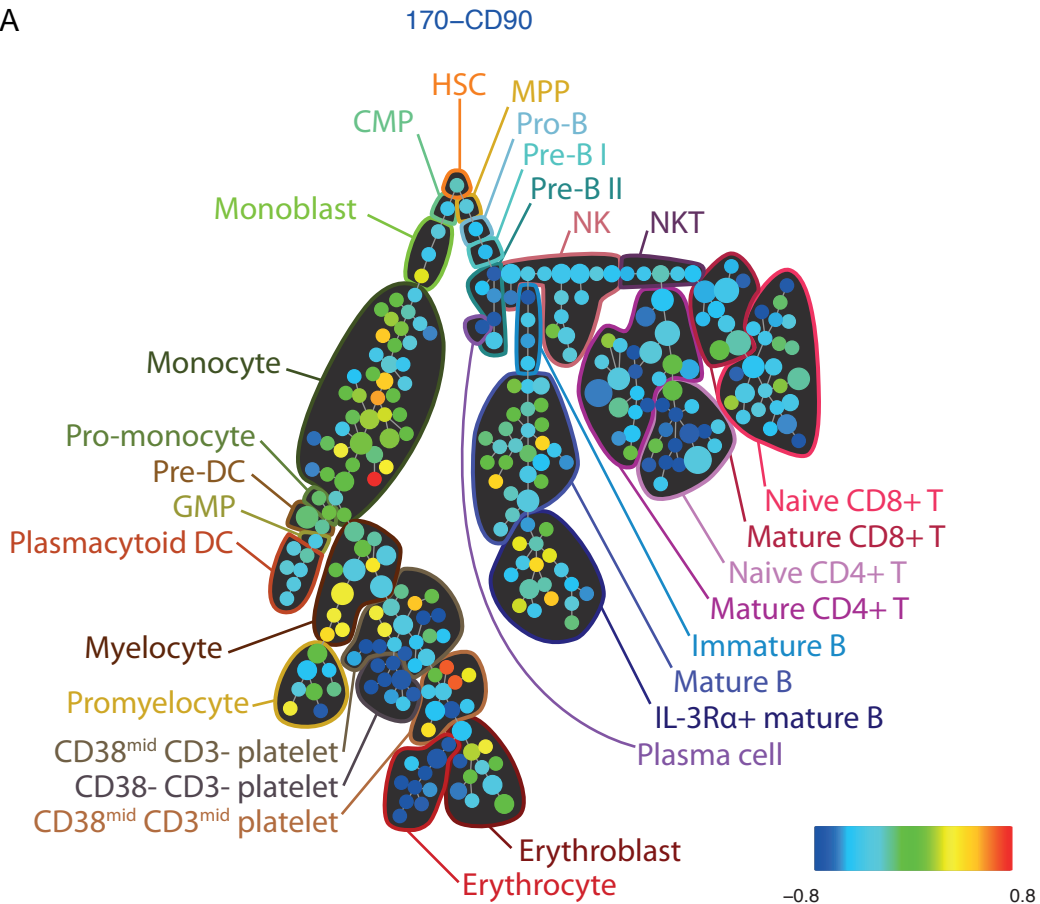

Figure S4A

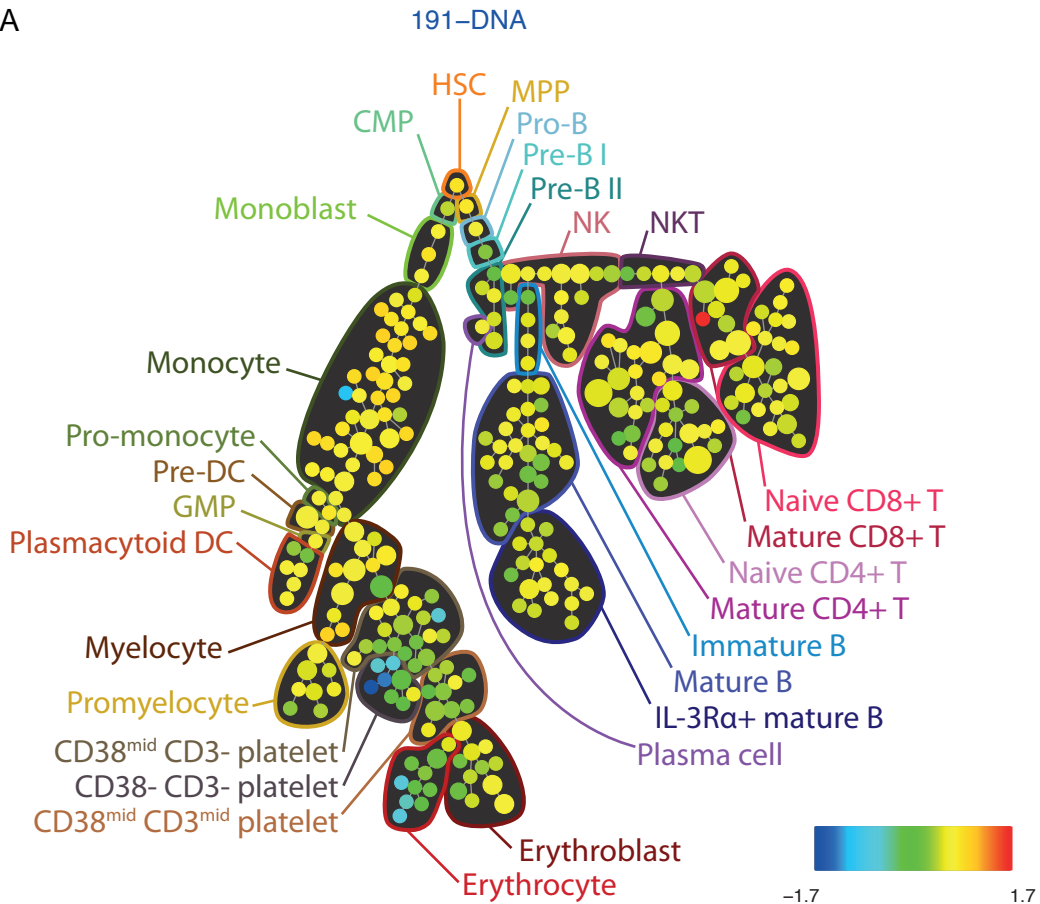

Figure S4A

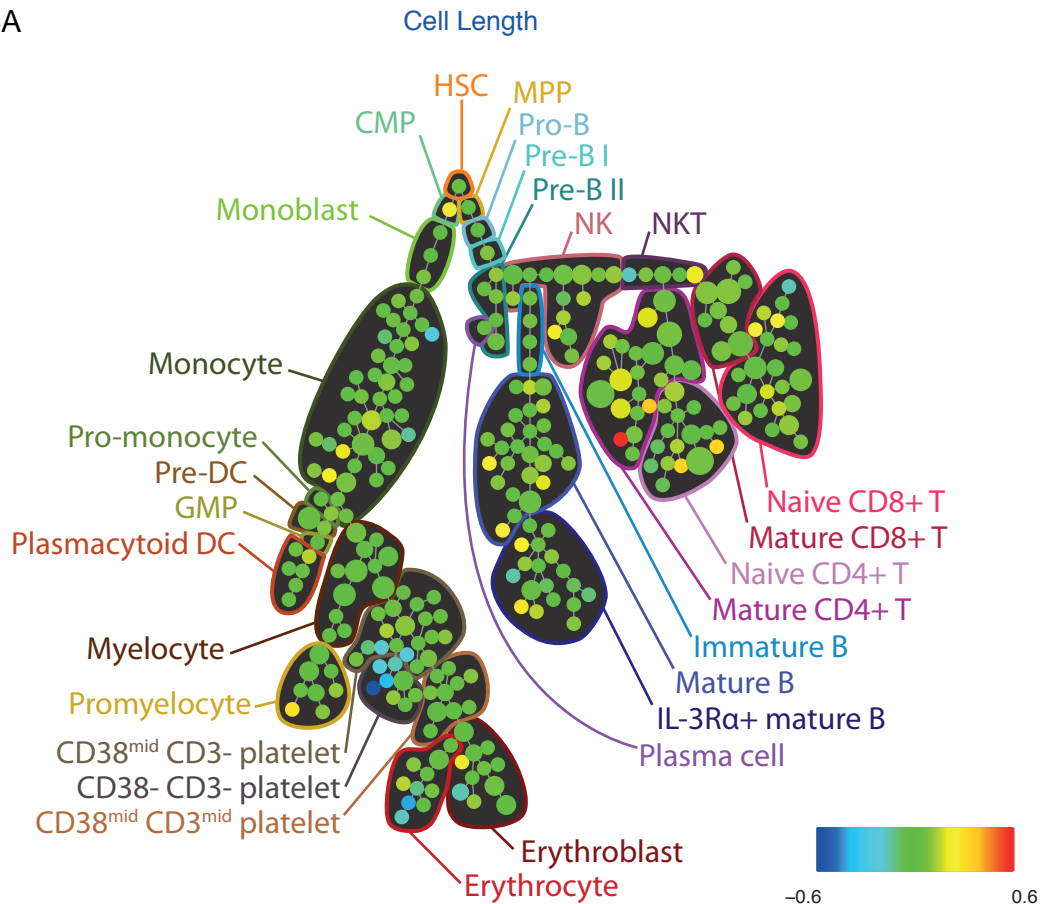

Figure S4B

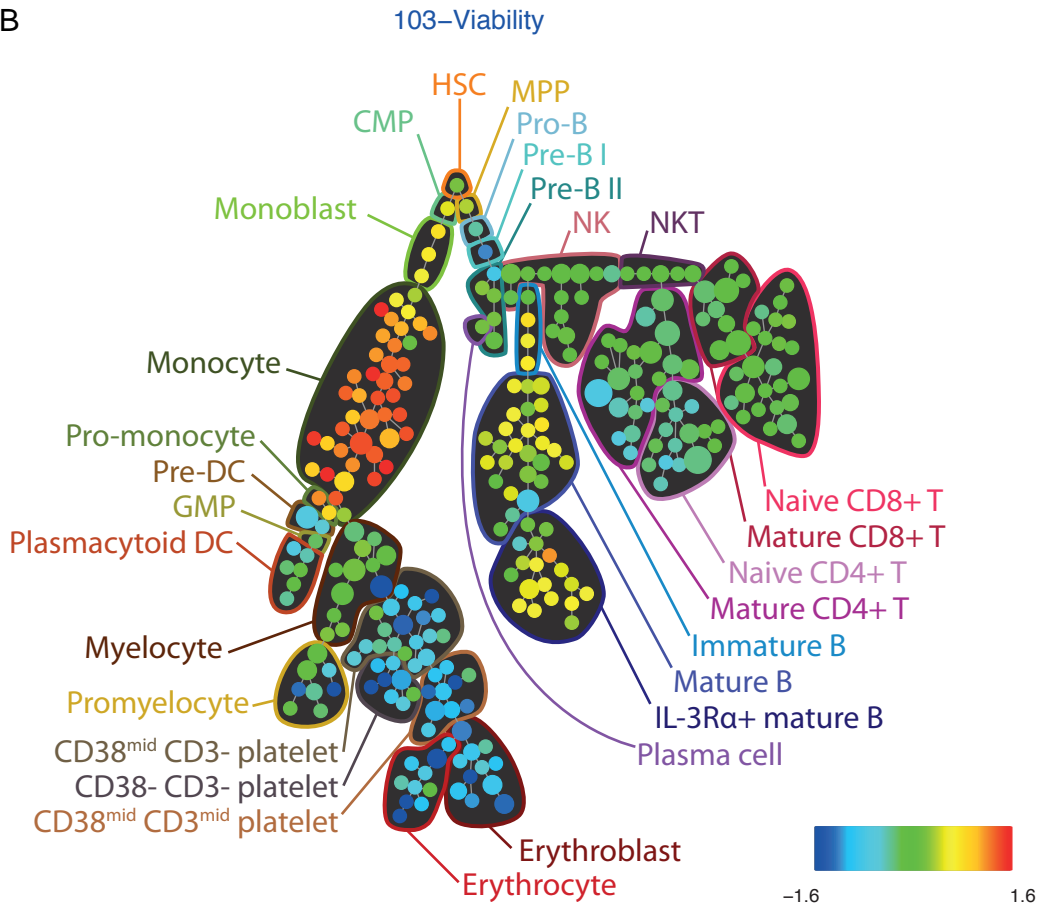

Figure S4B

110 114-CD3

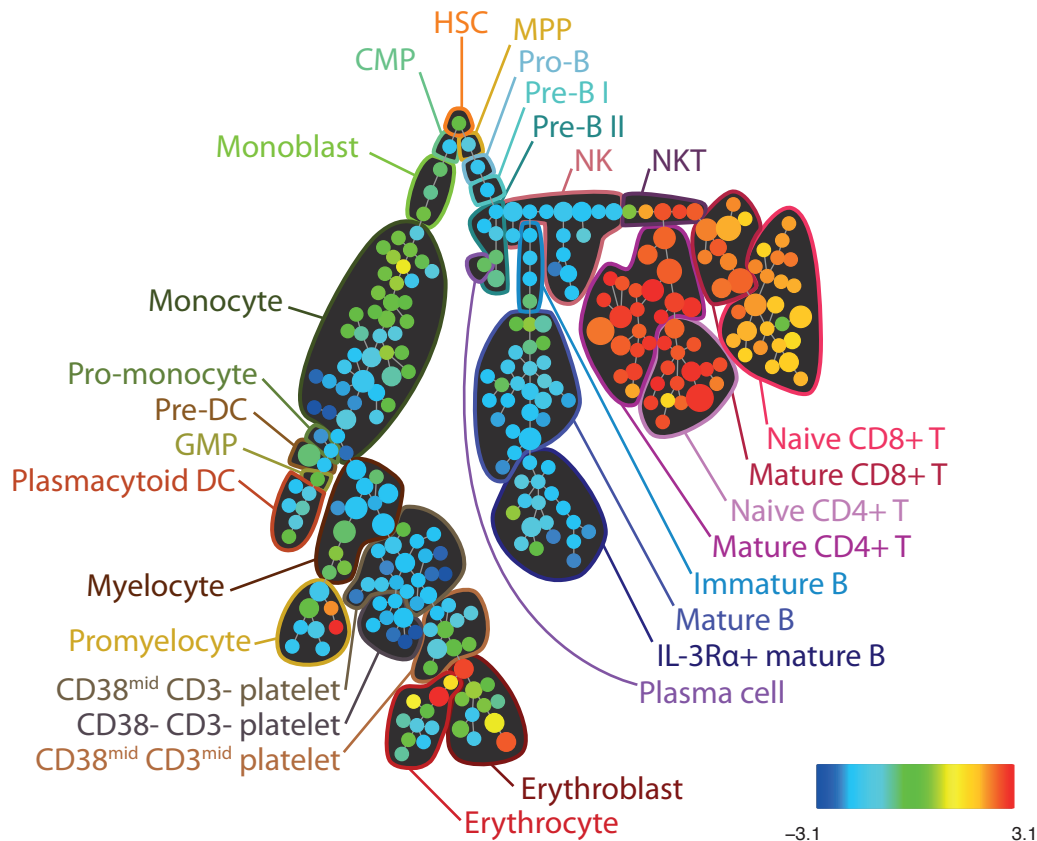

Figure S4B

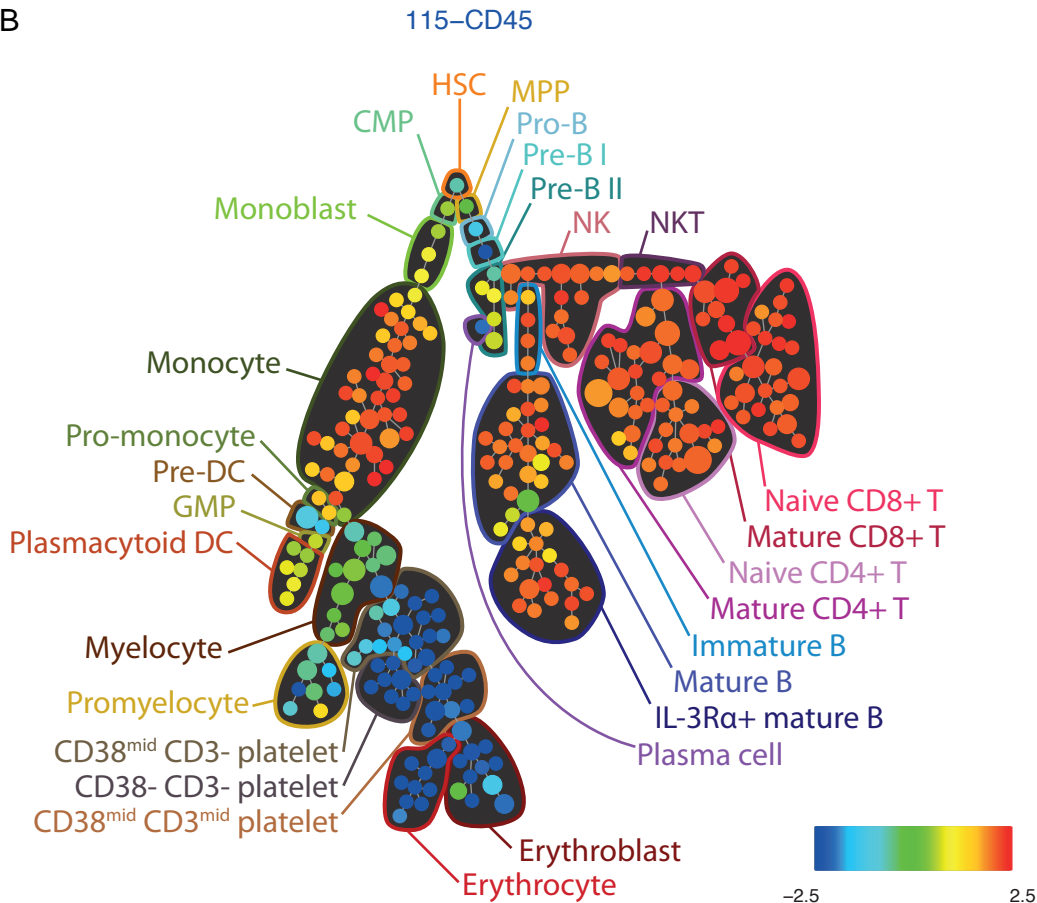

Figure S4B

139-CD45RA

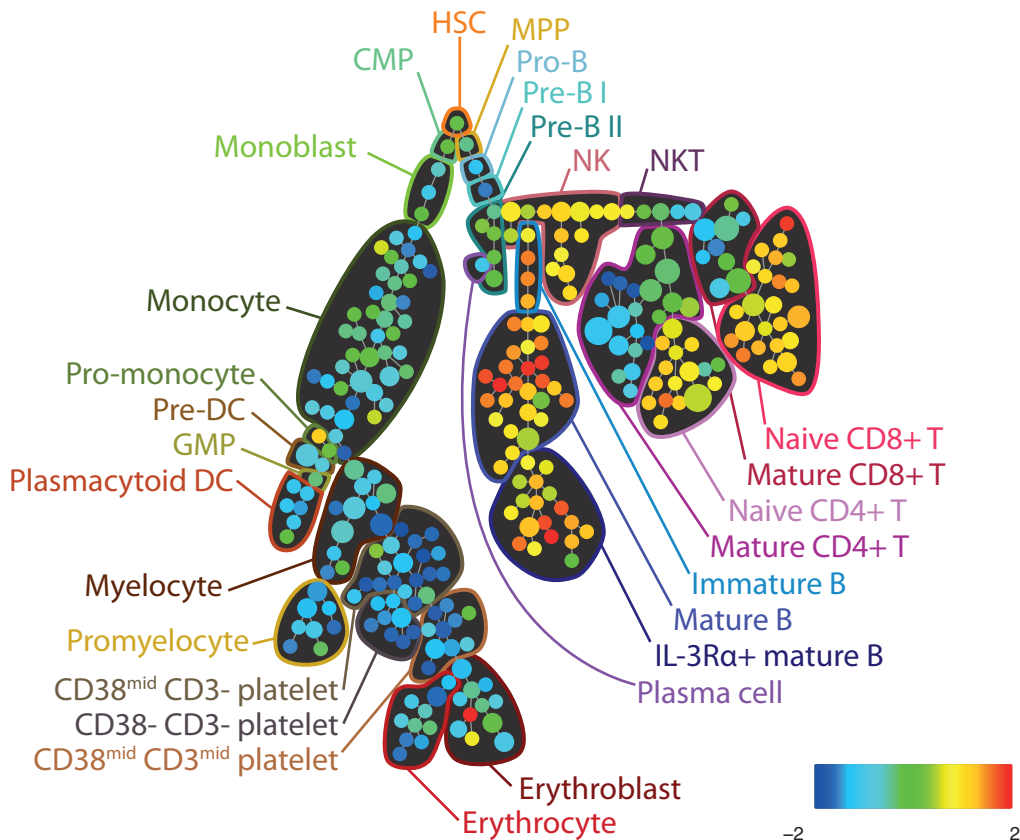

Figure S4B

141-CD235ab

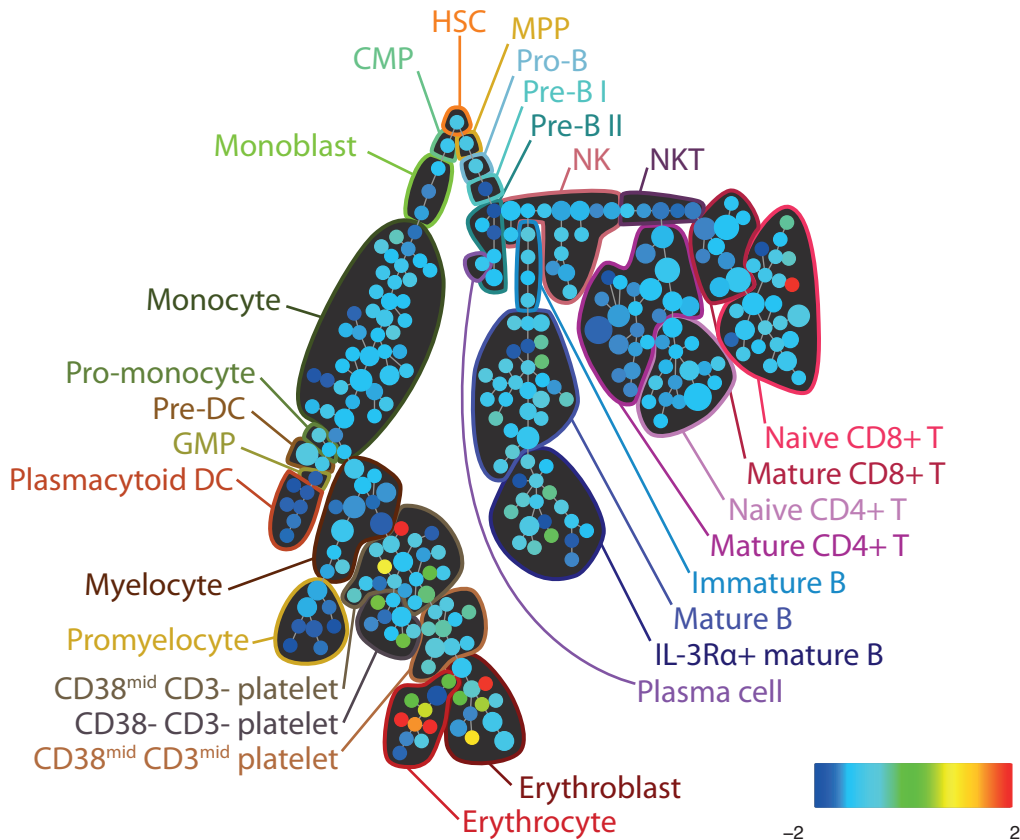



Figure S4B

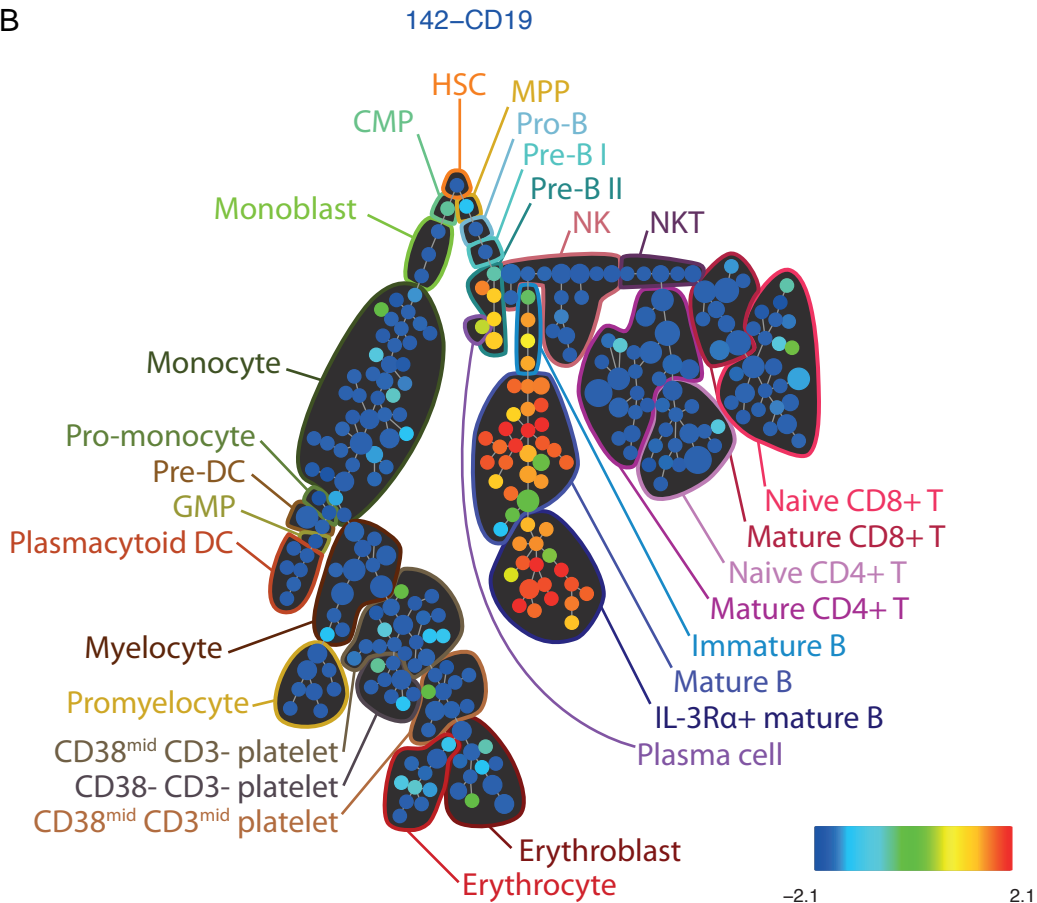

Figure S4B

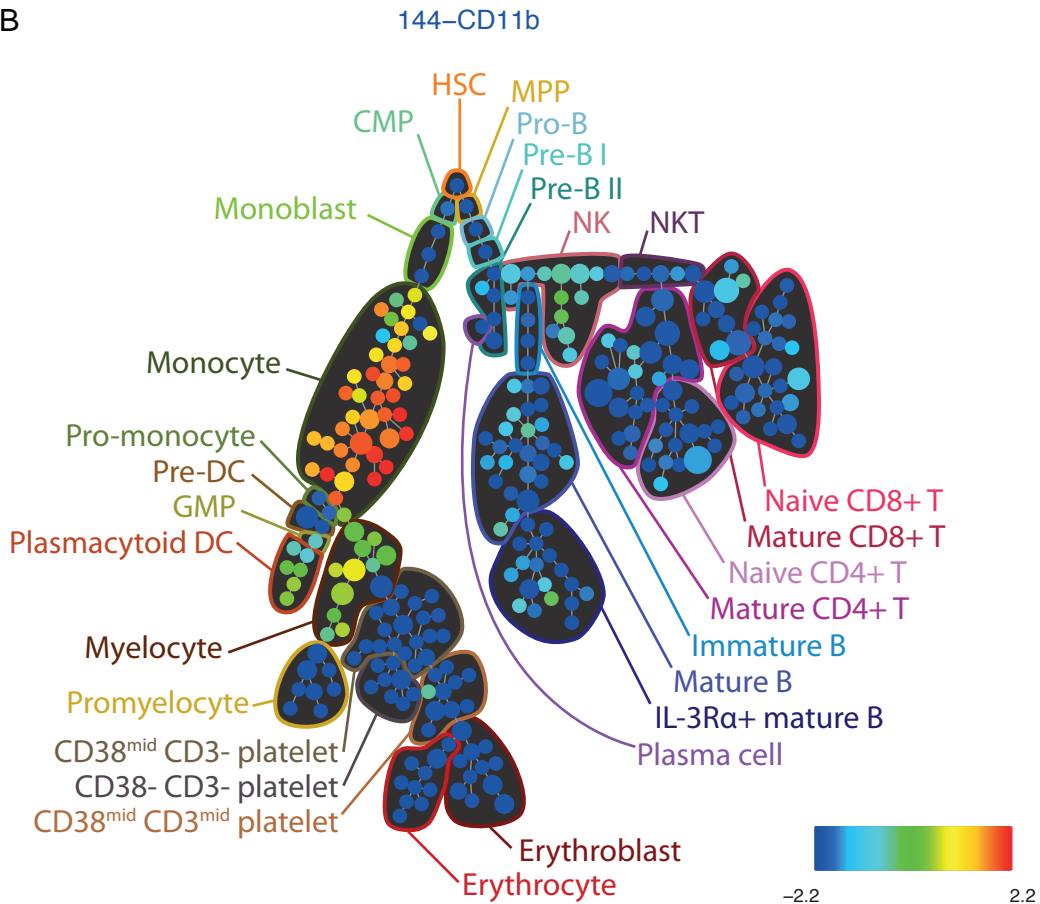

Figure S4B

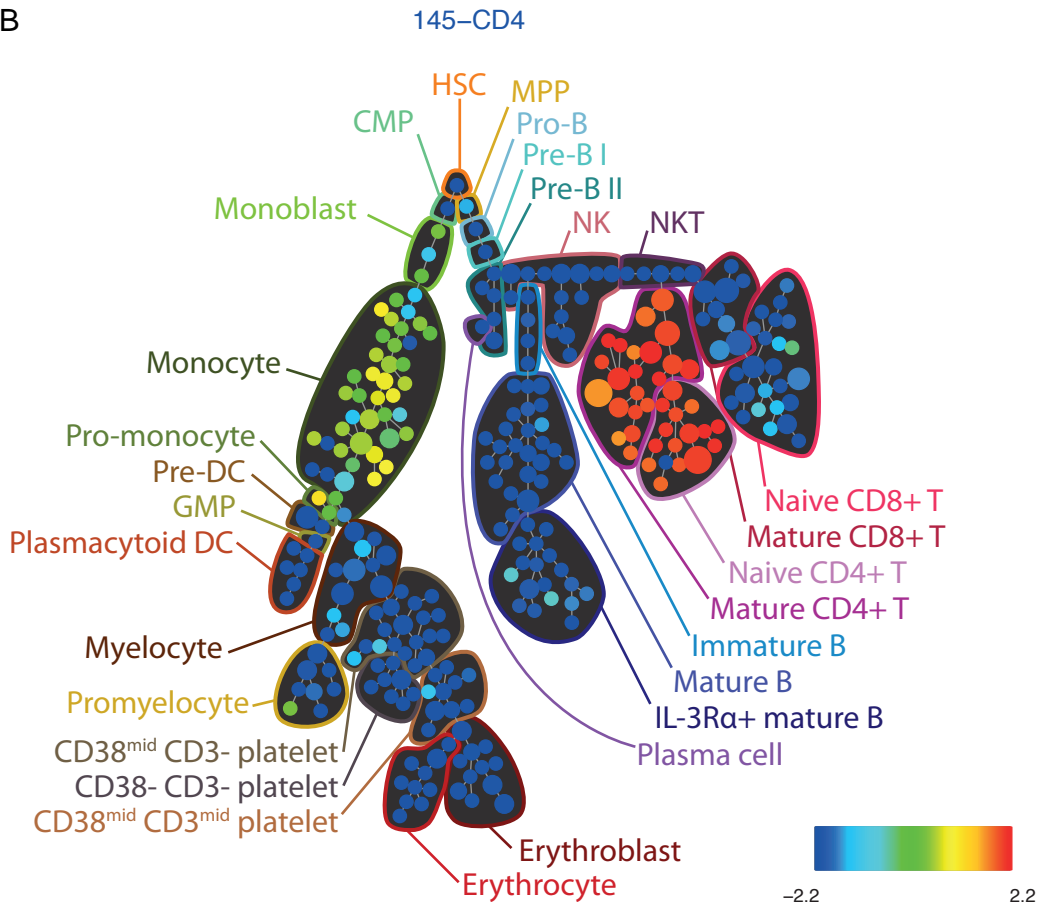

Figure S4B

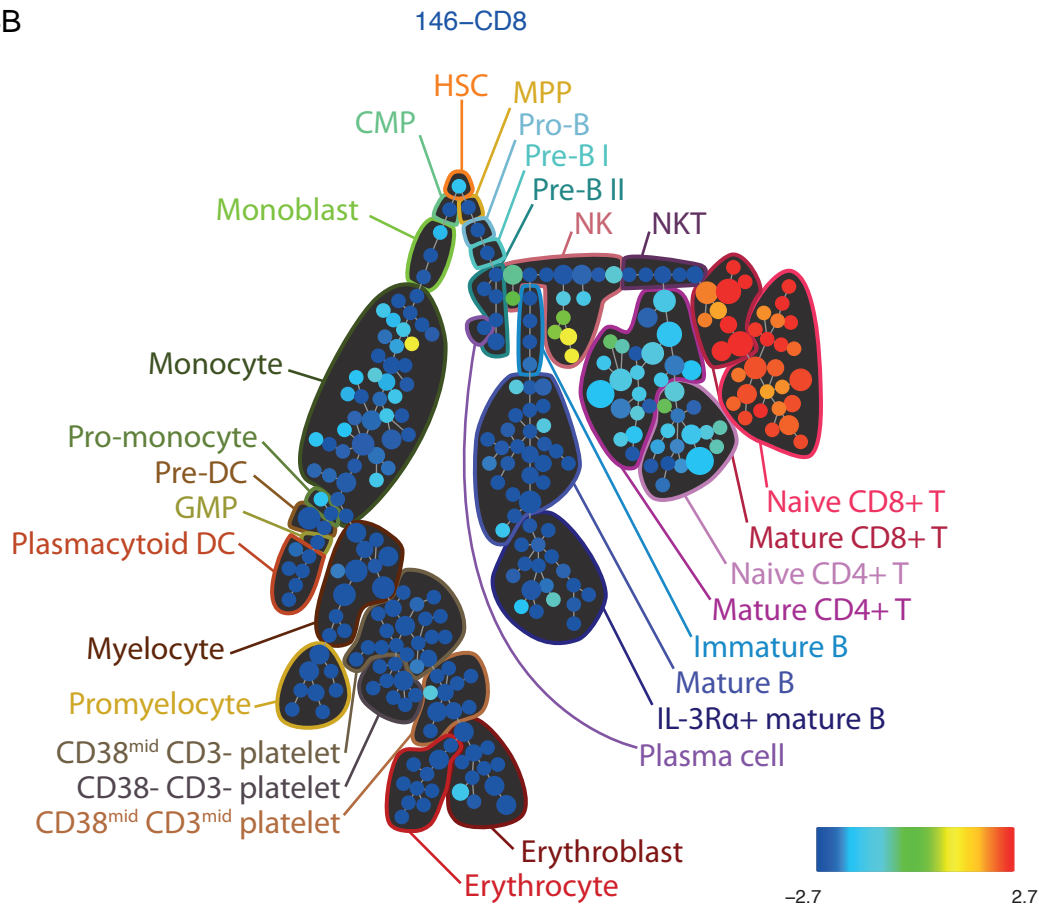

Figure S4B

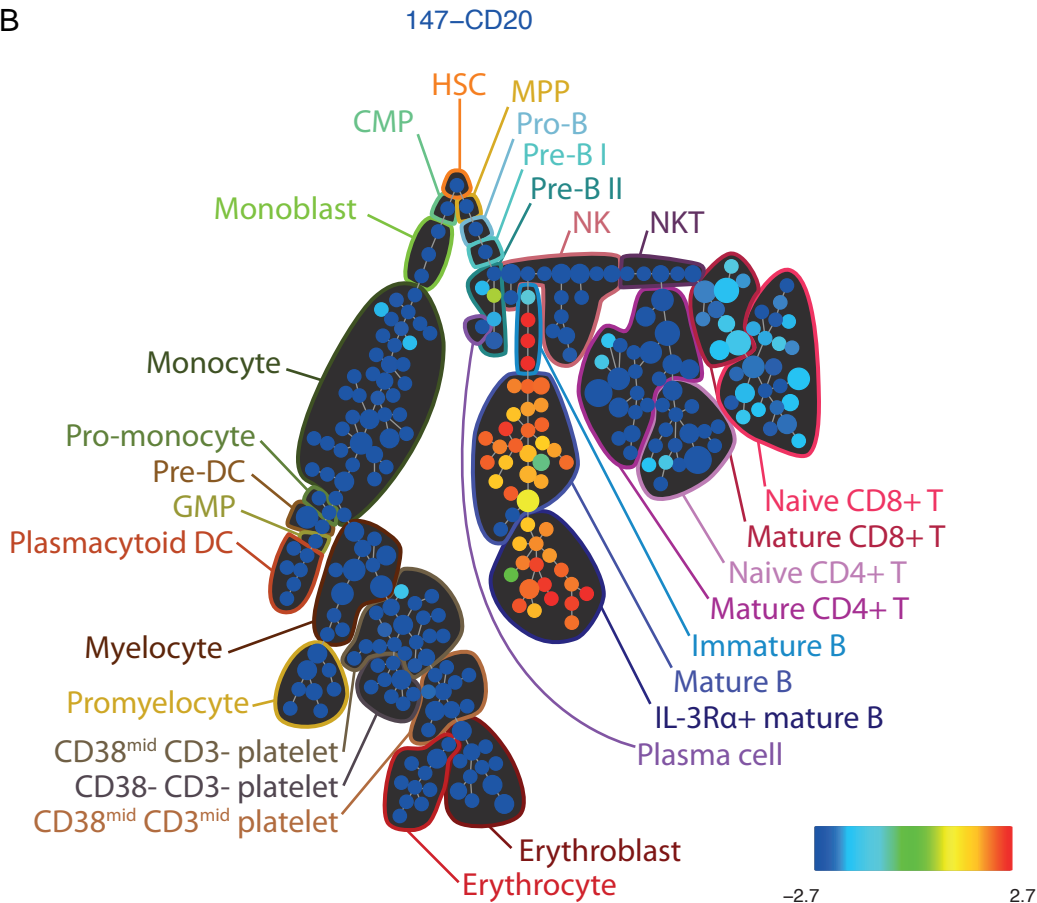

Figure S4B

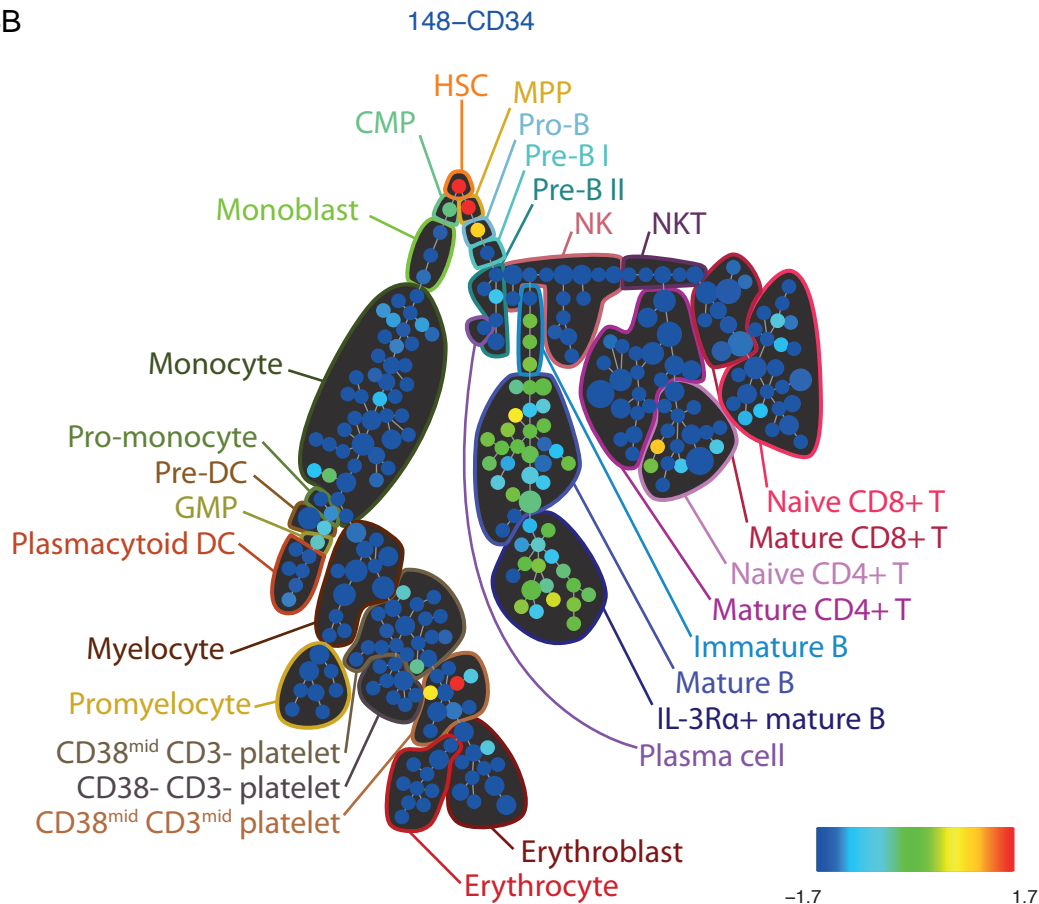

Figure S4B

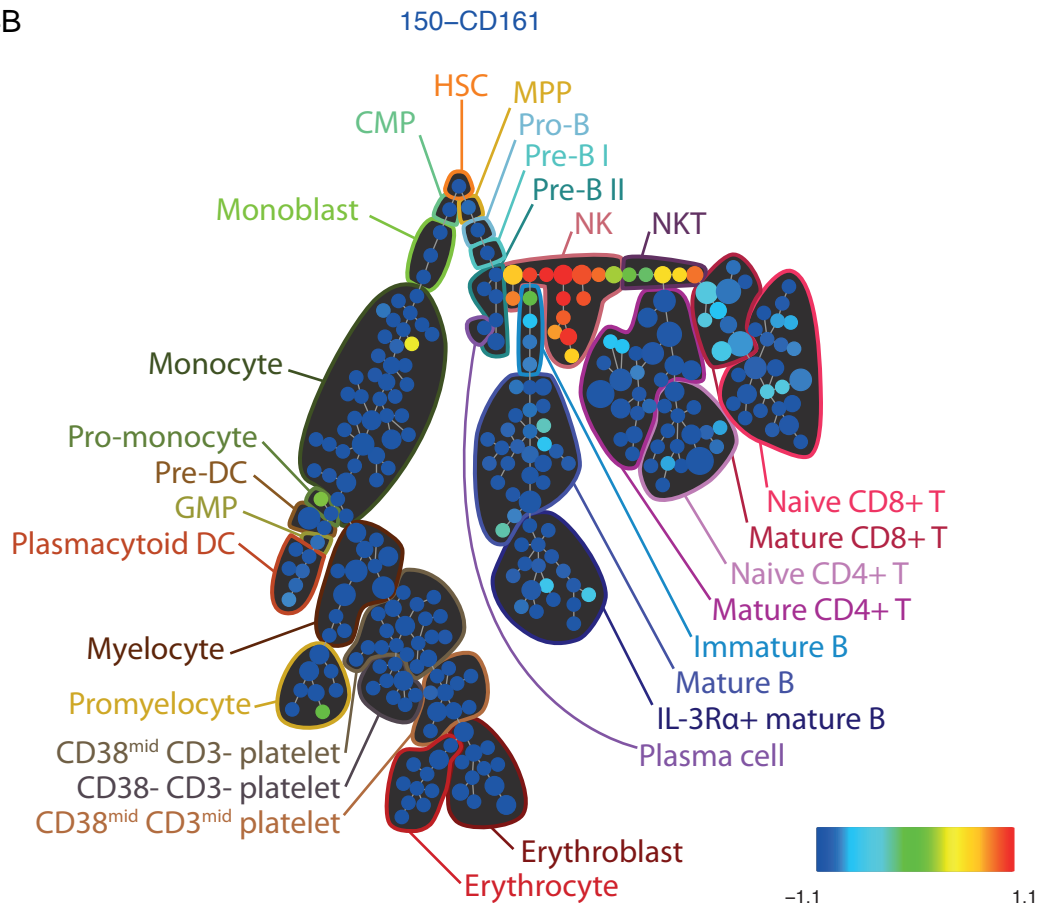

Figure S4B

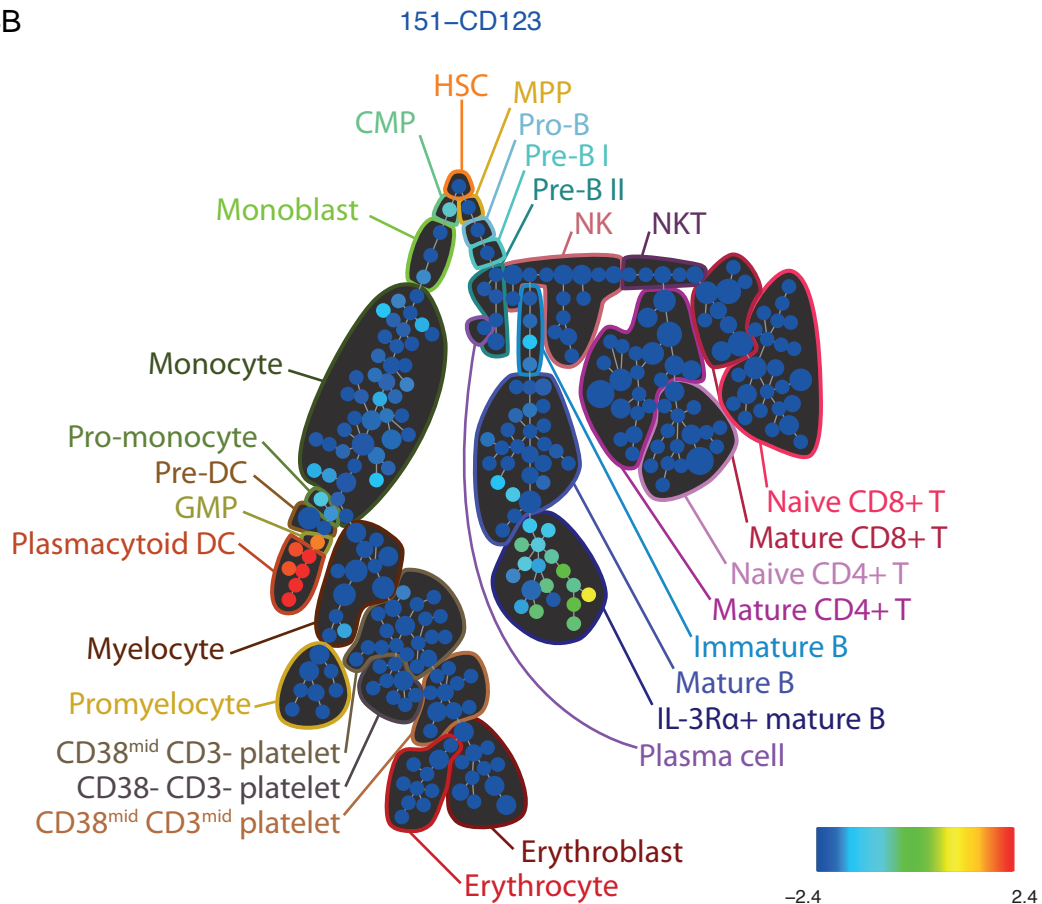



Figure S4B

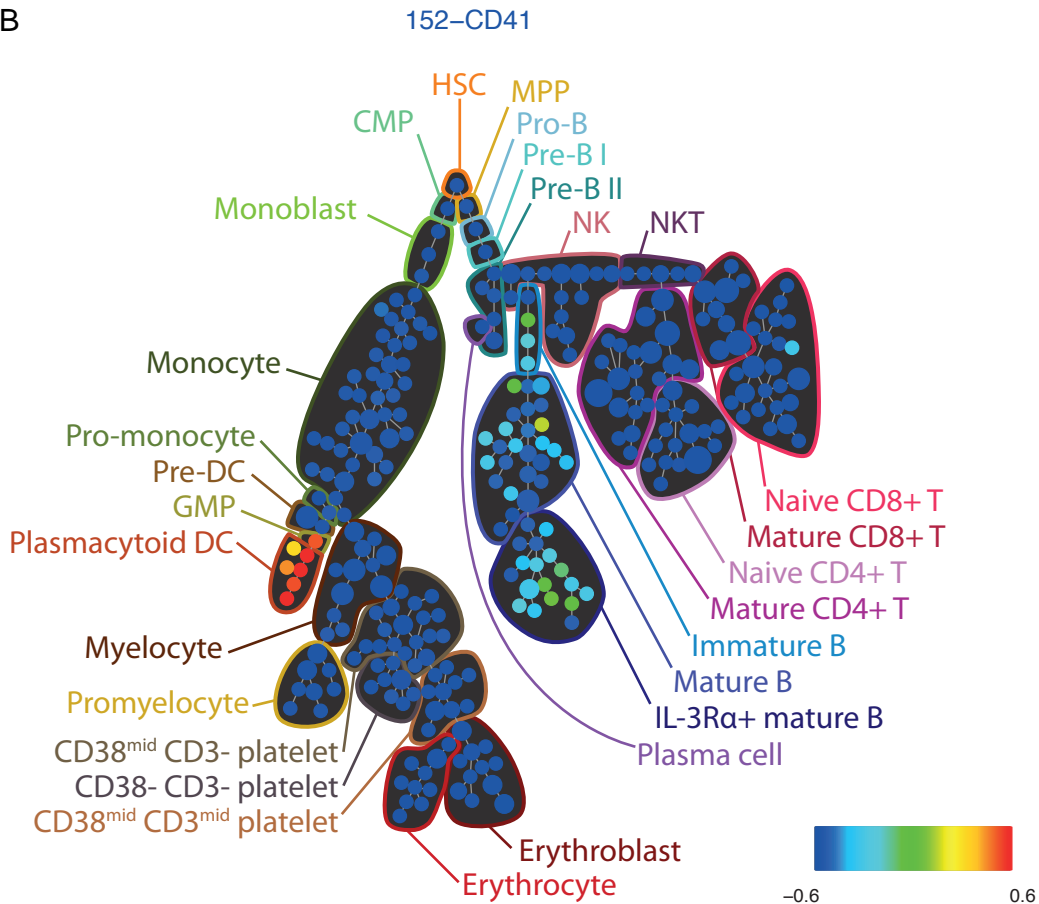

Figure S4B

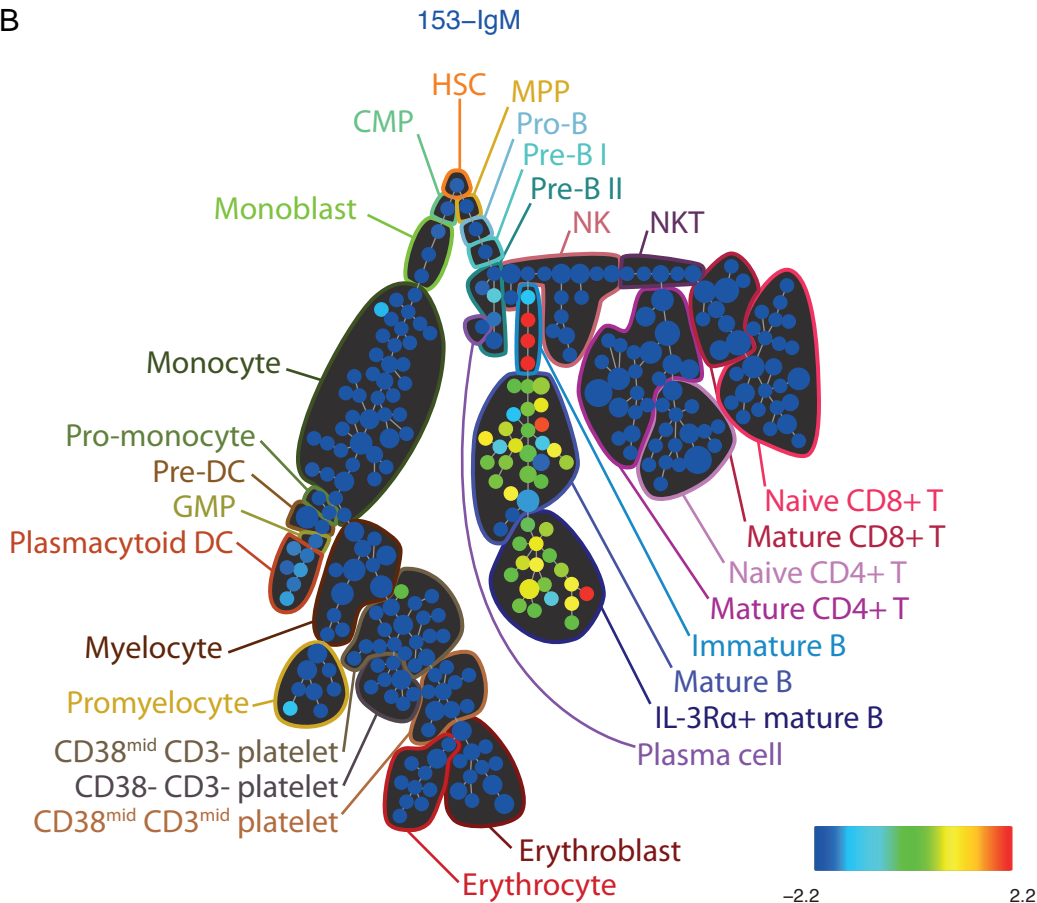

Figure S4B

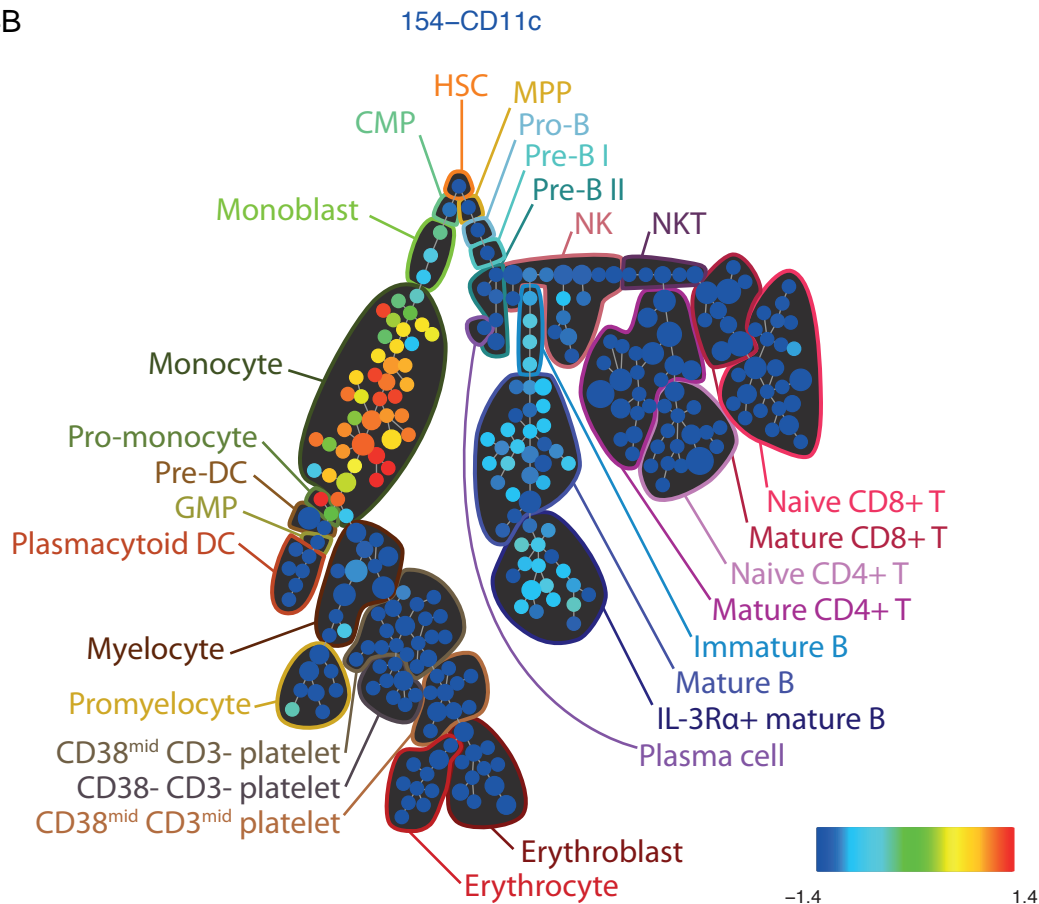

Figure S4B

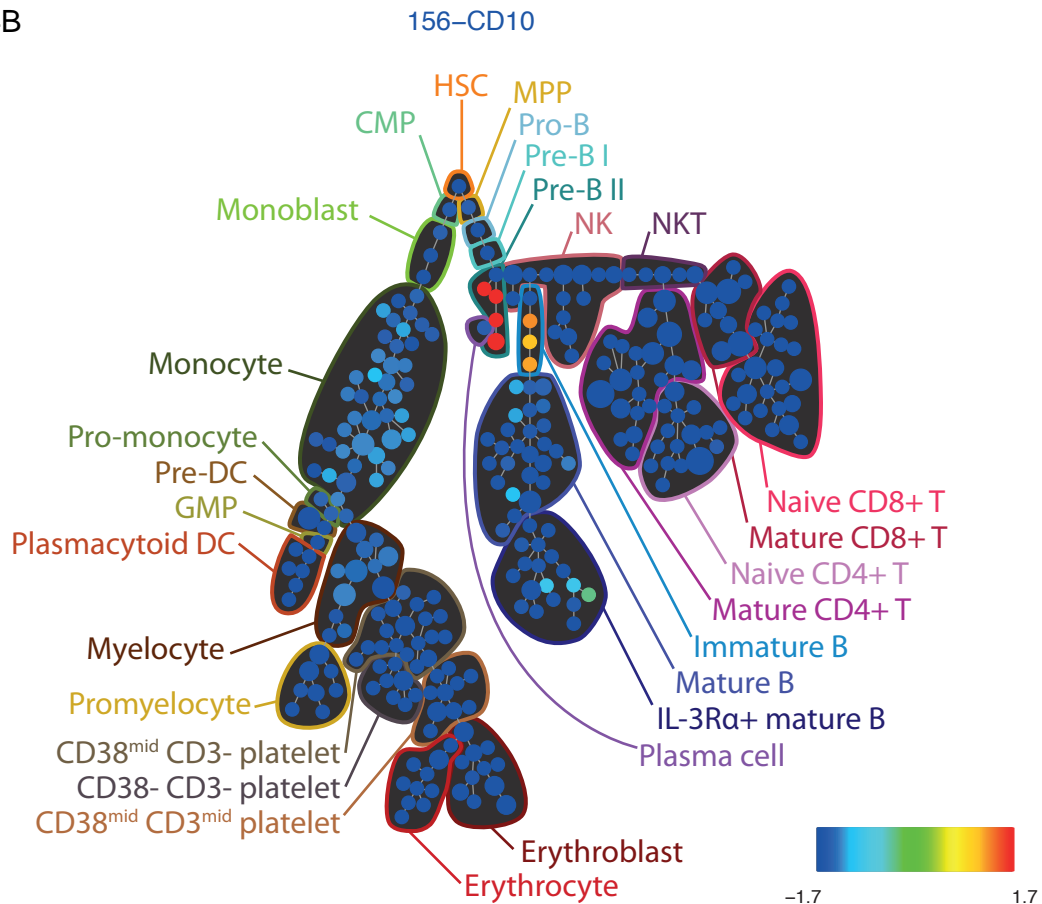

Figure S4B

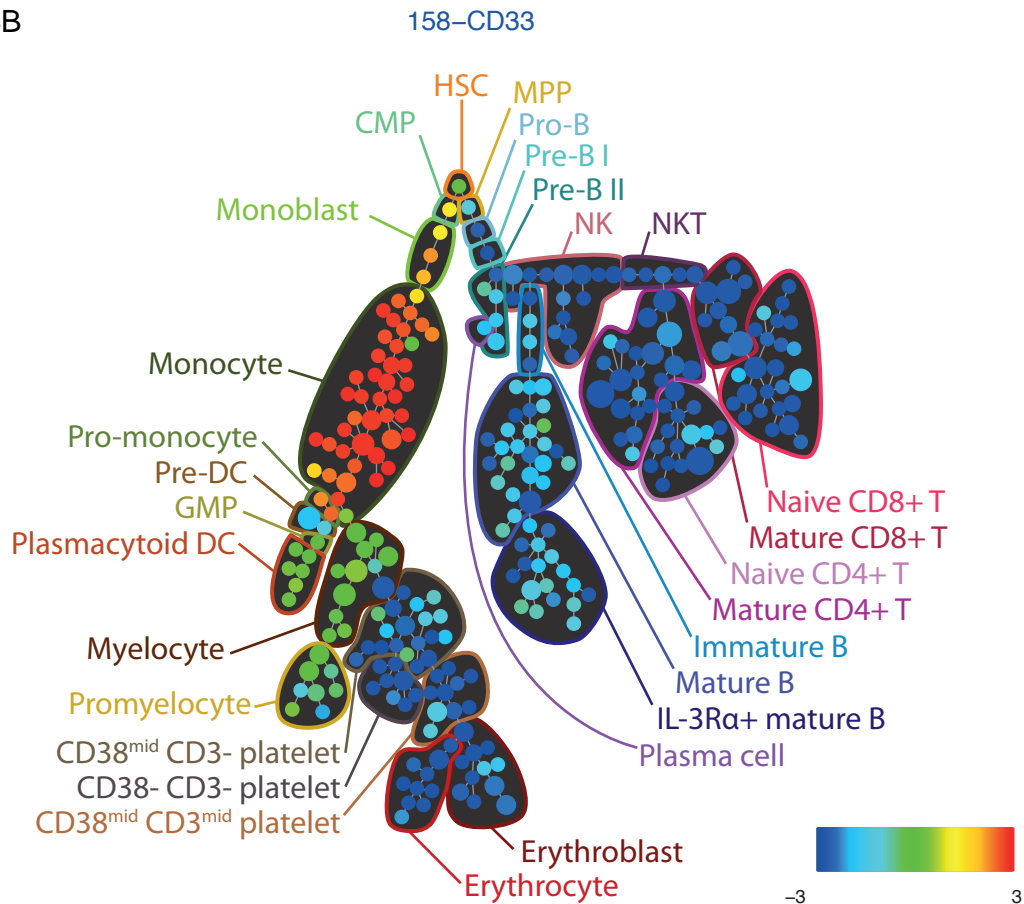

Figure S4B

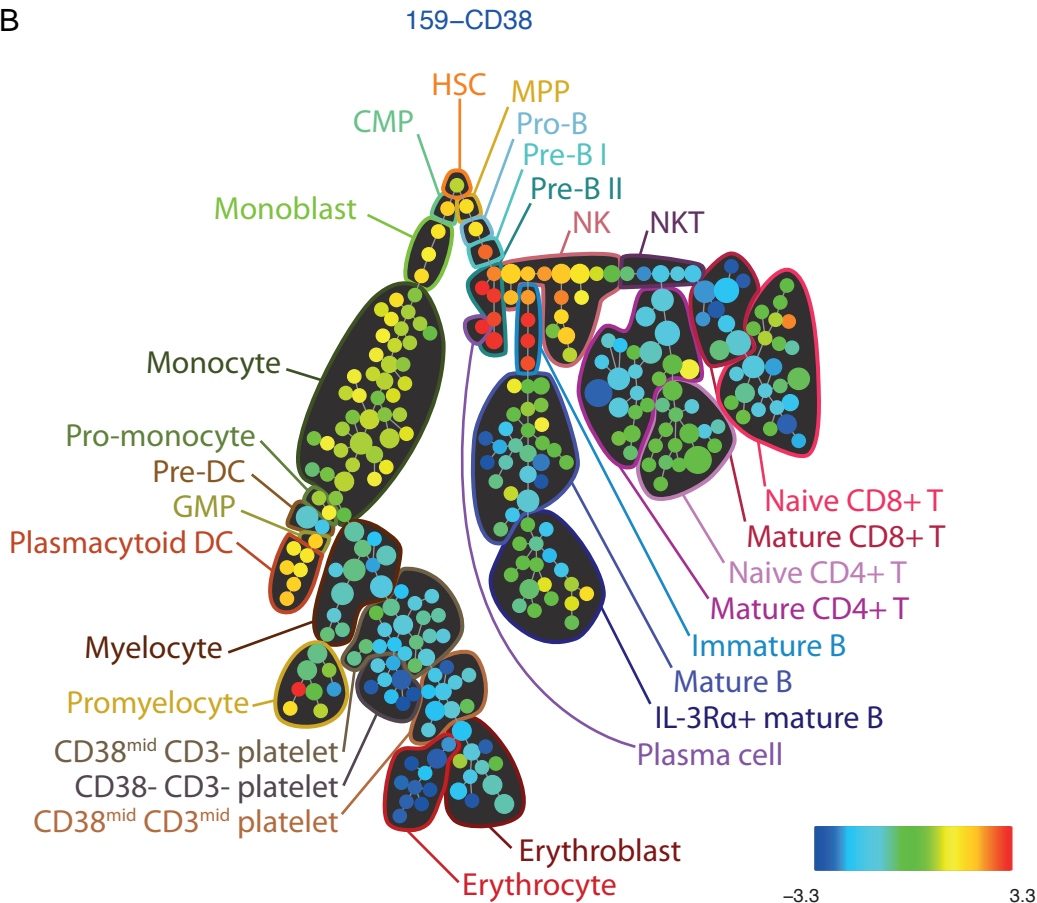

Figure S4B

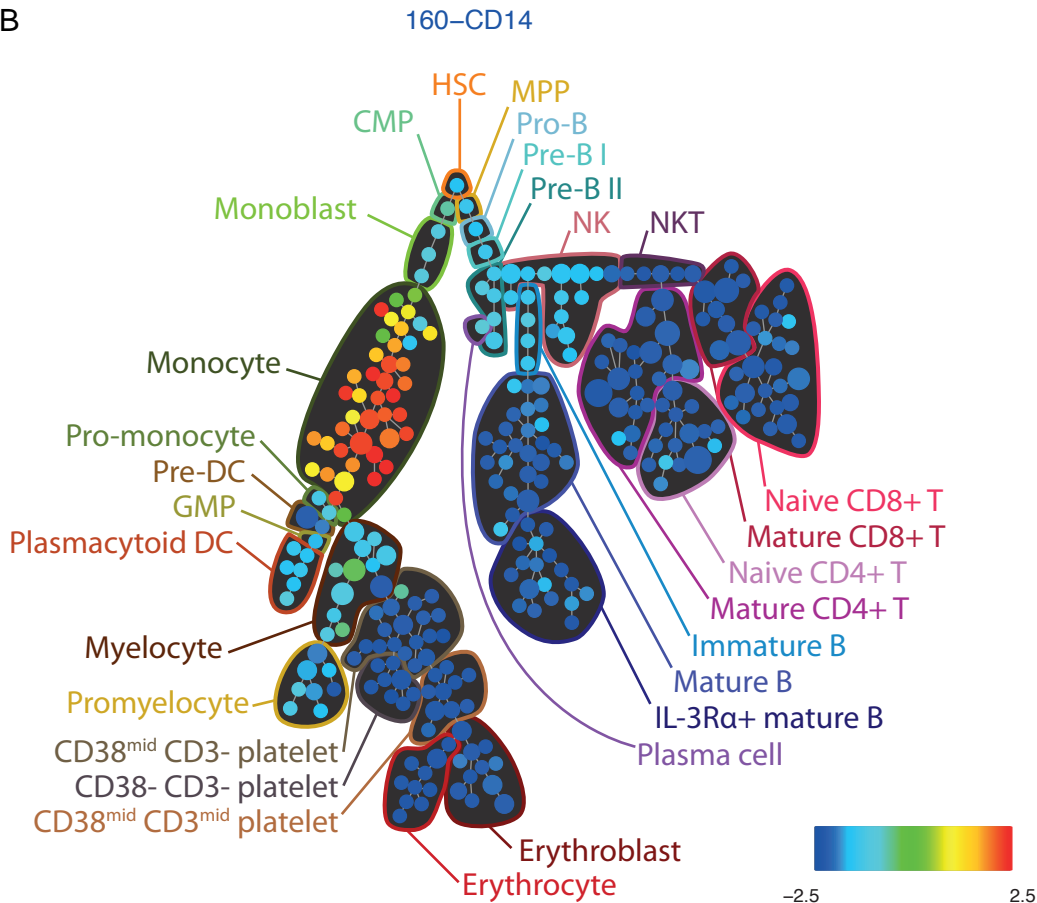

Figure S4B

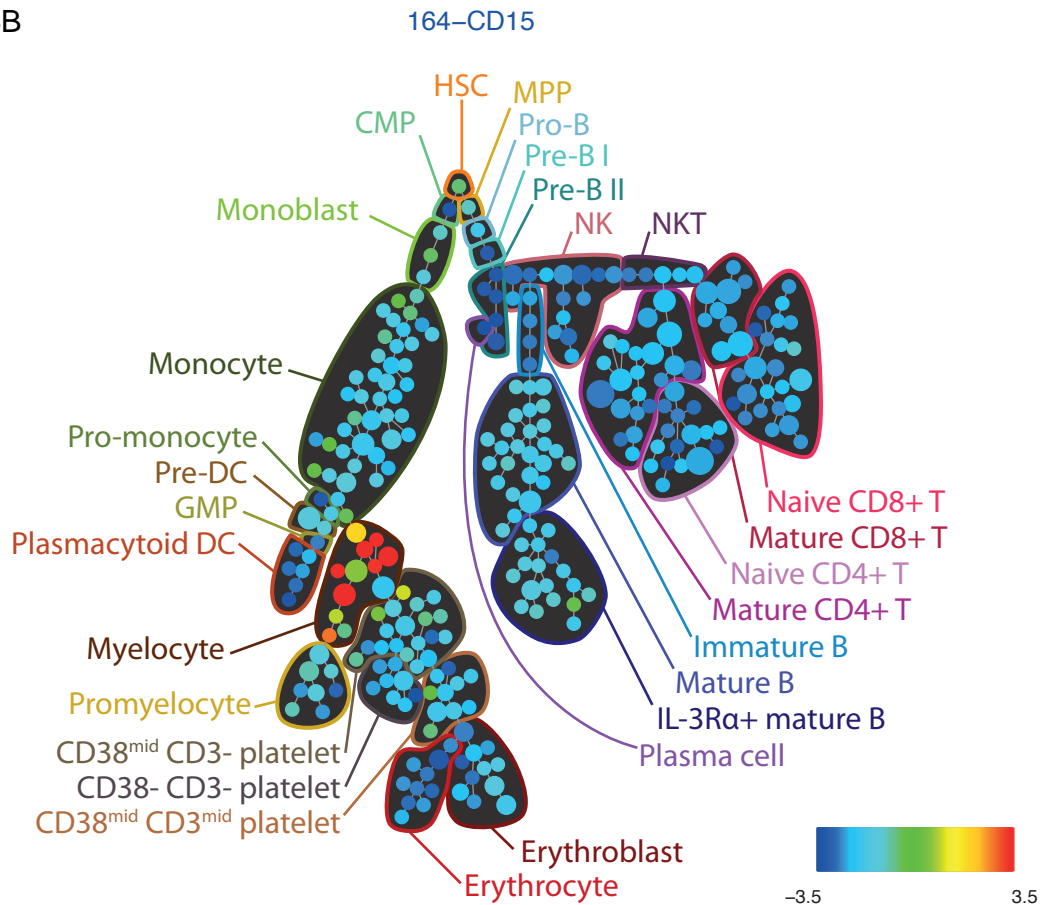



Figure S4B

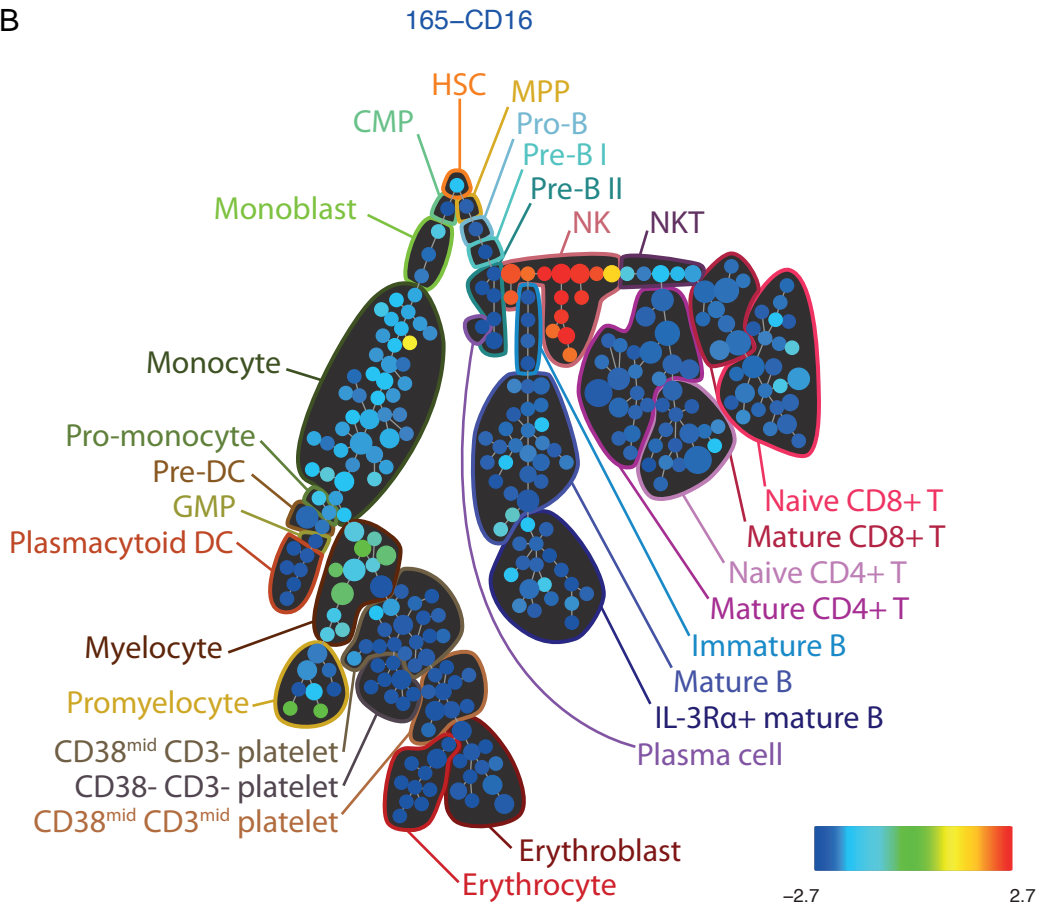

Figure S4B

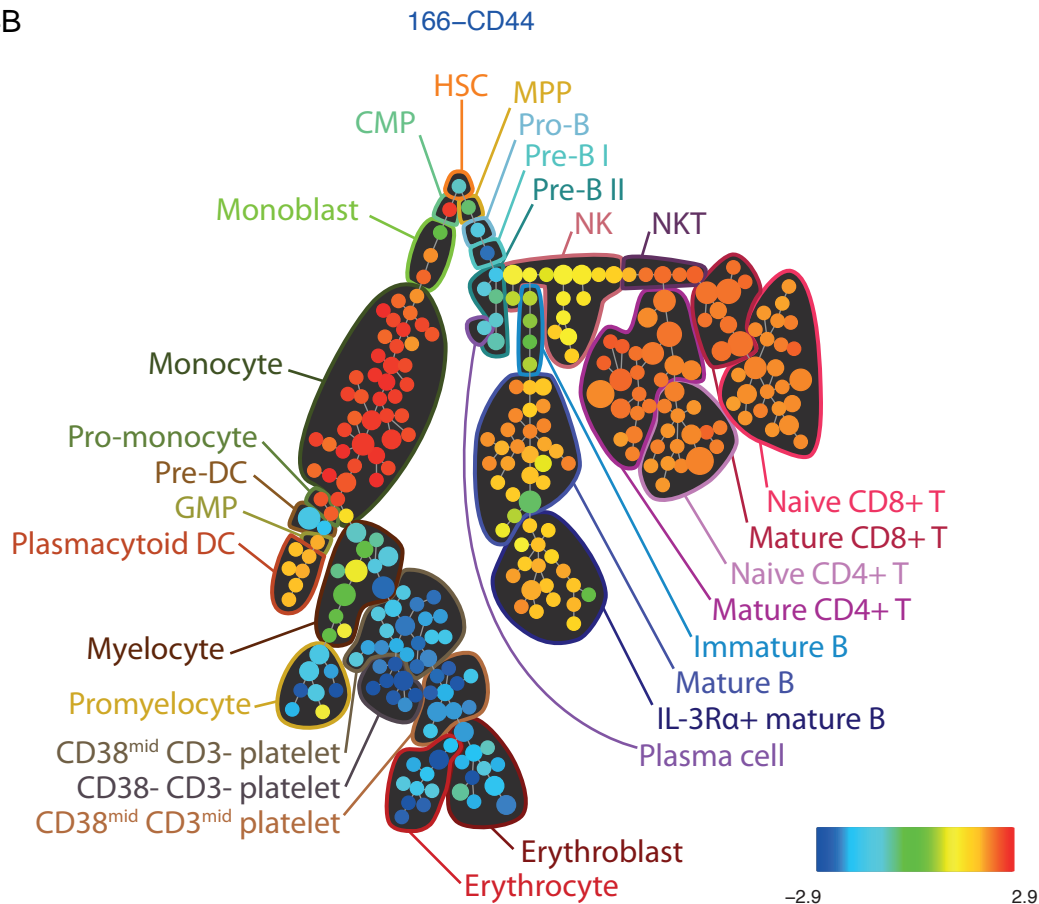

Figure S4B

167-CD7

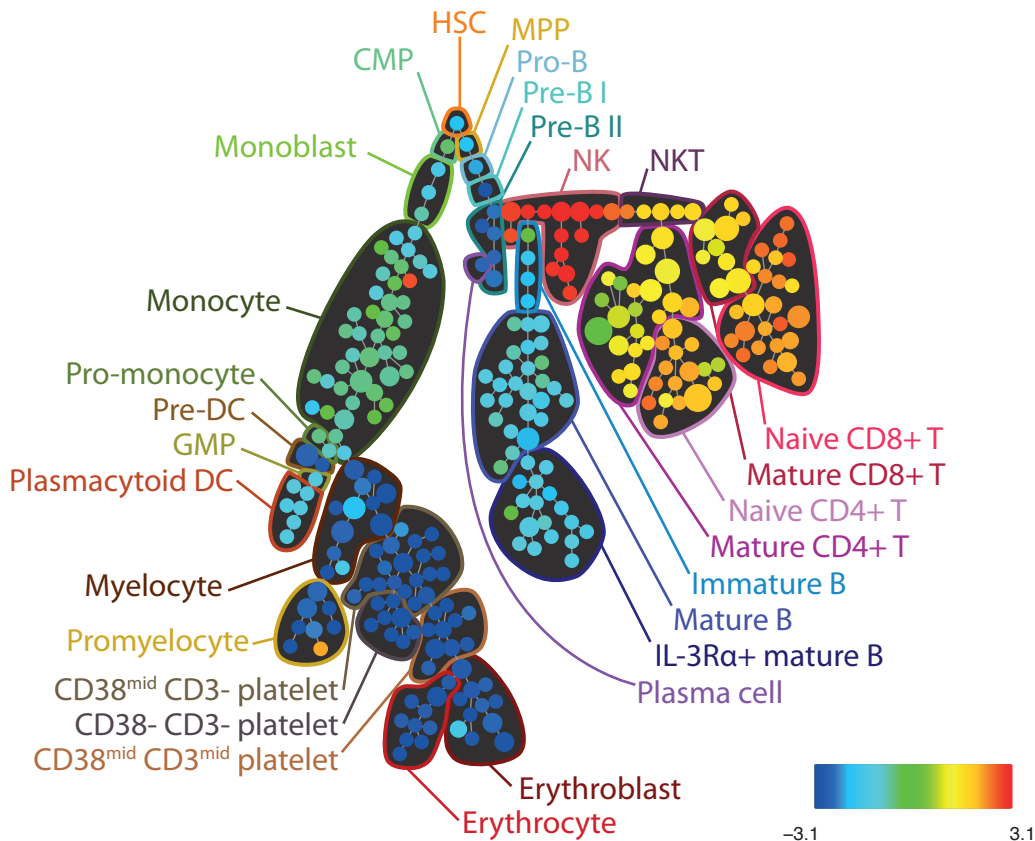

Figure S4B

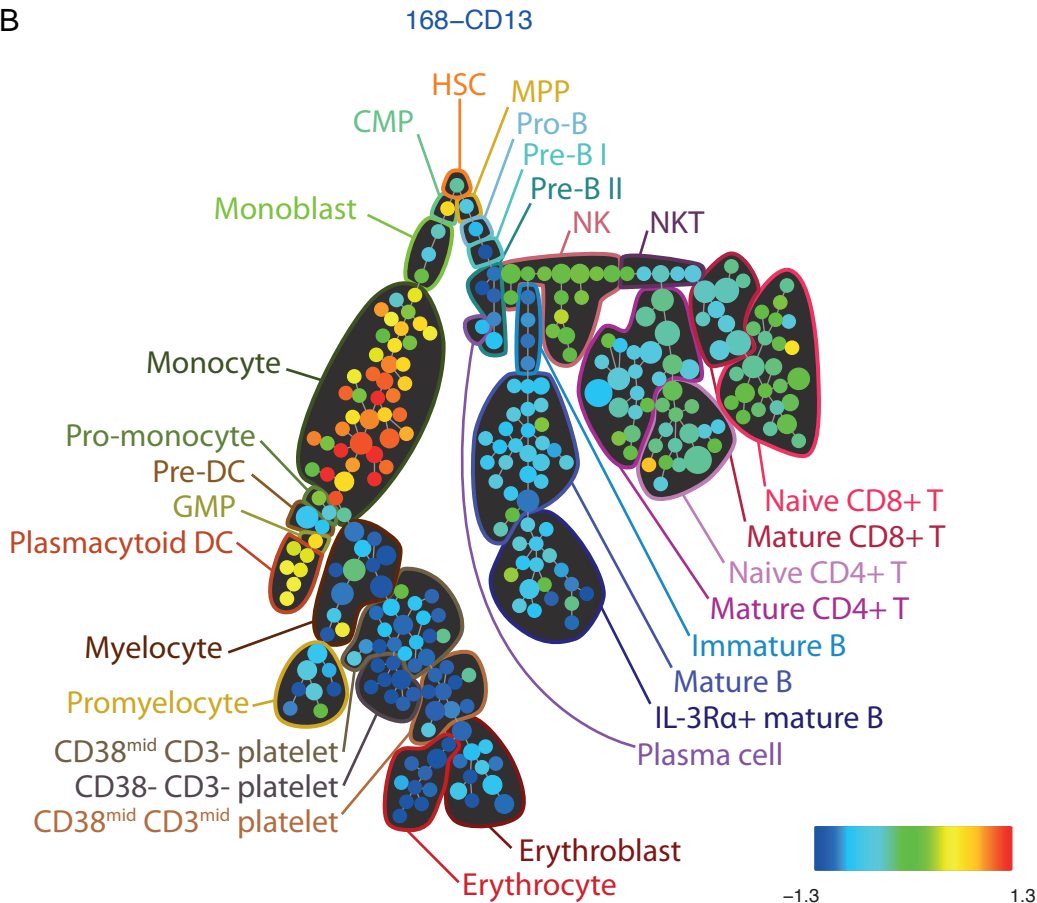

Figure S4B

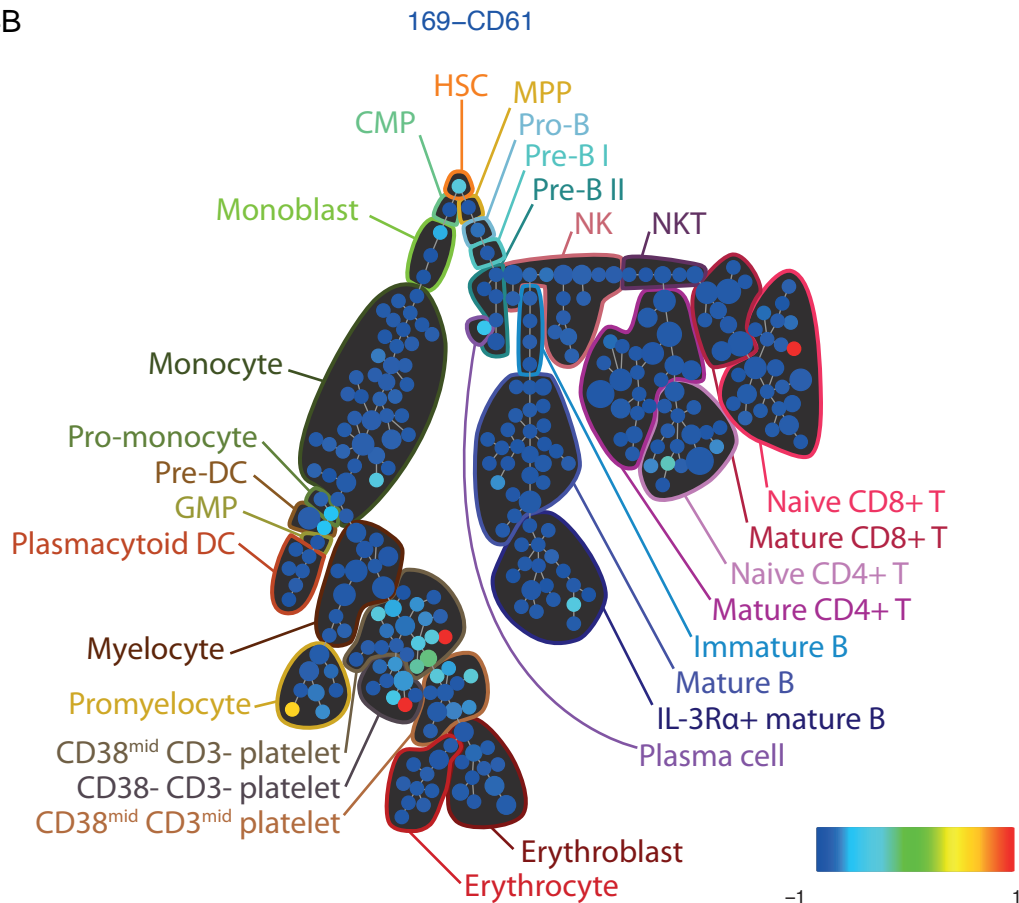

Figure S4B

170-CD56

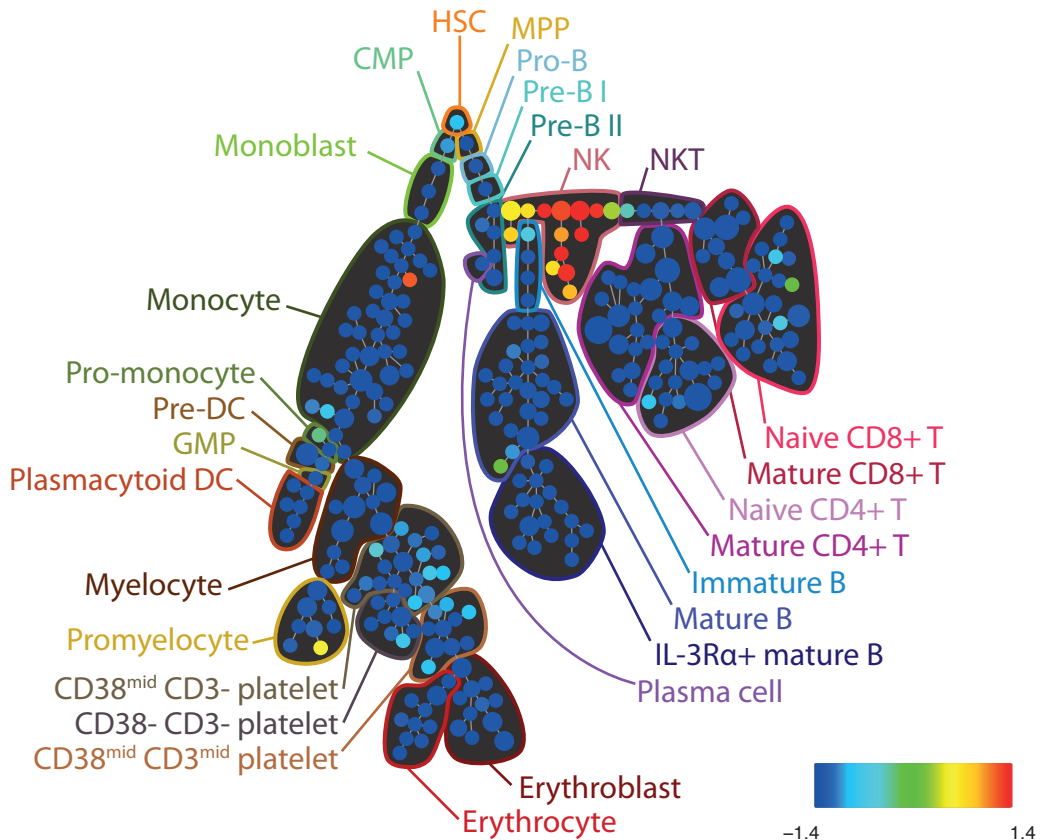

Figure S4B

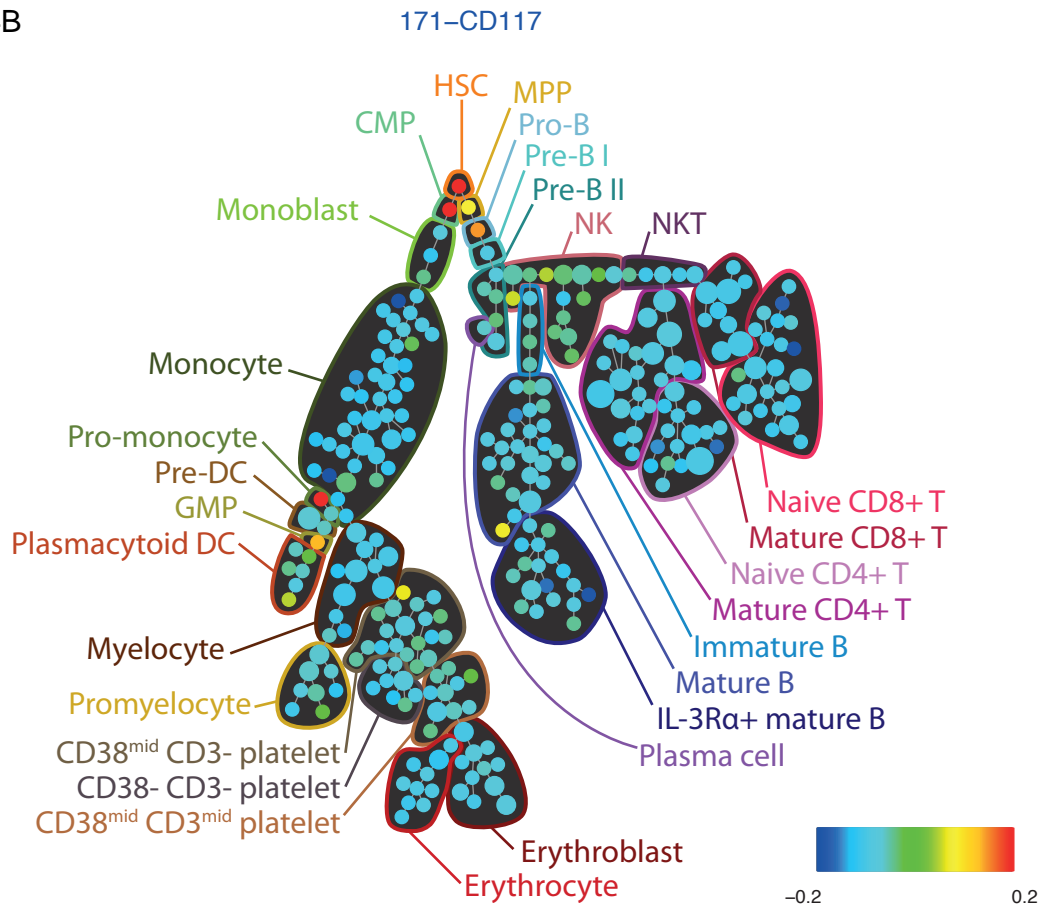

Figure S4B

172-CD47

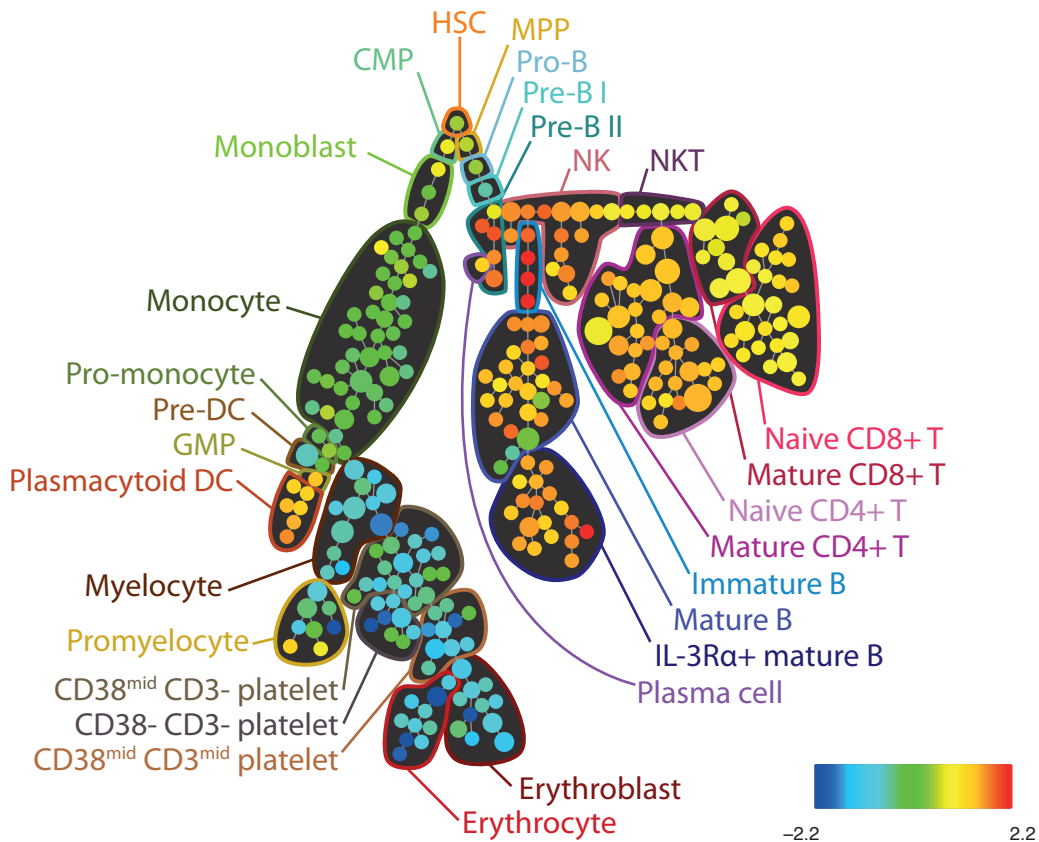



Figure S4B

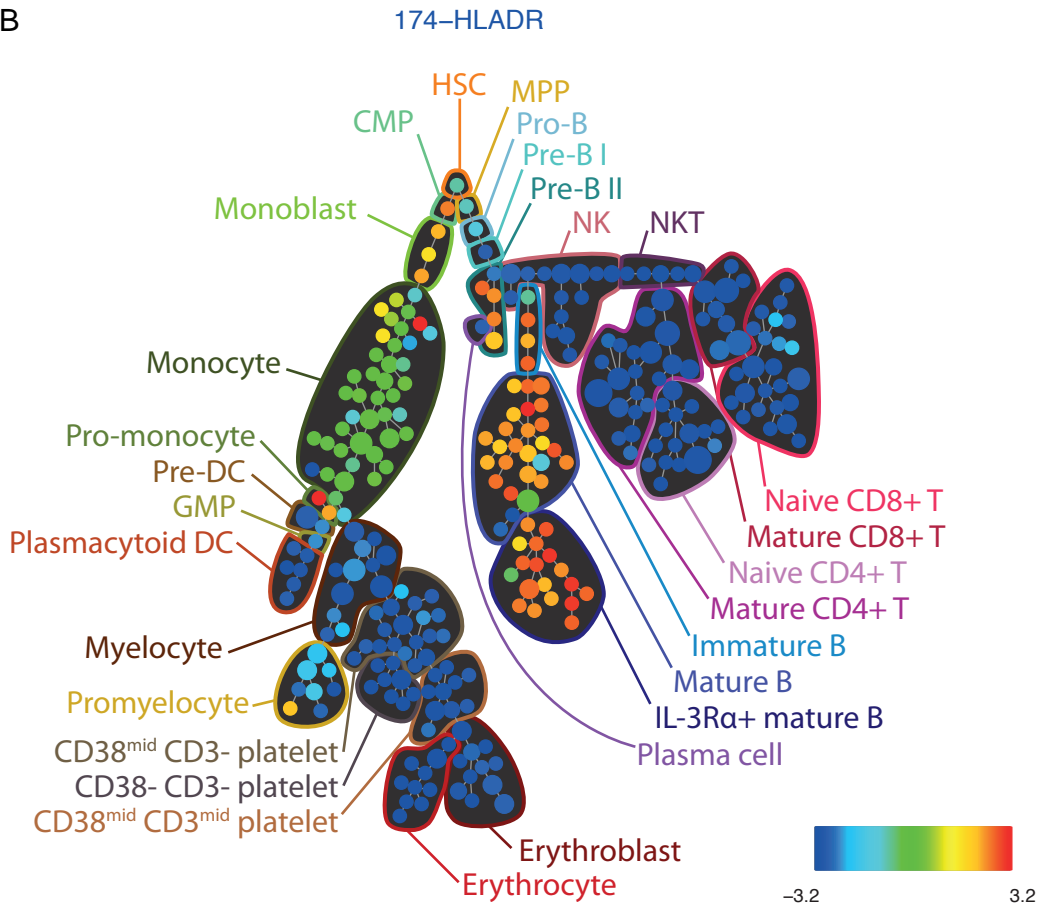

Figure S4B

175-CXCR4

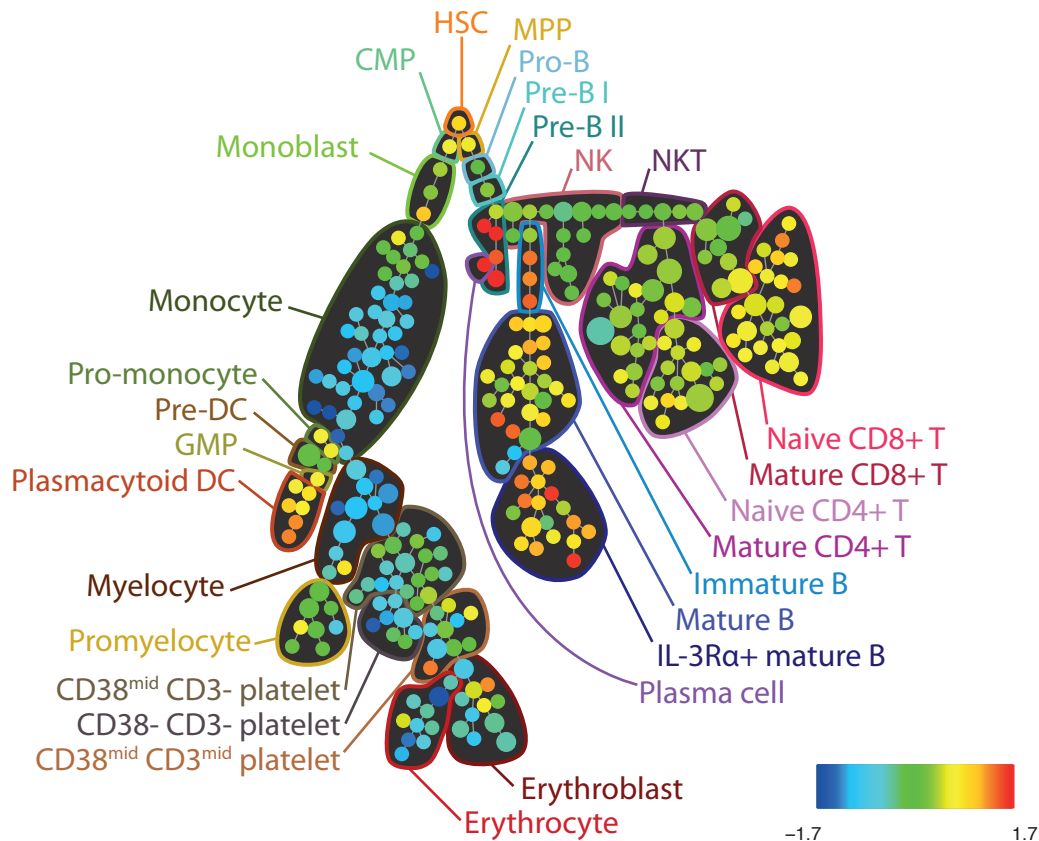

Figure S4B

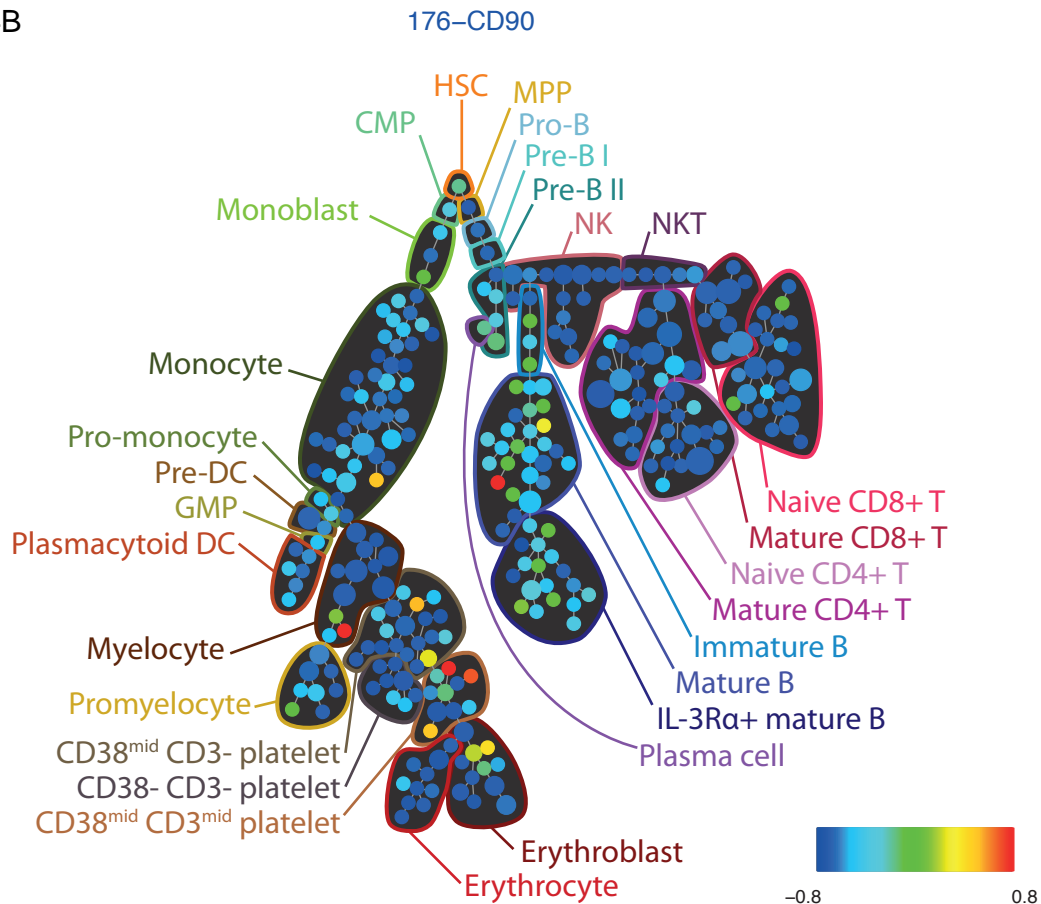

Figure S4B

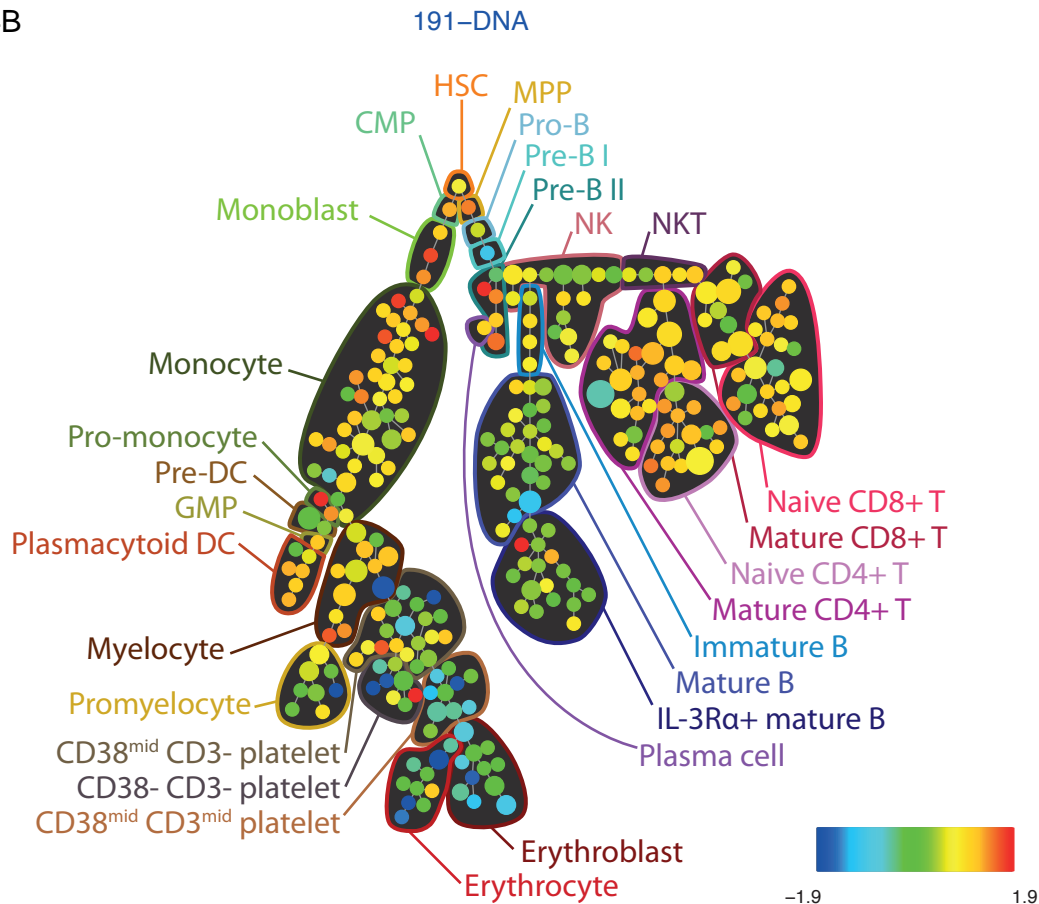

Figure S4B

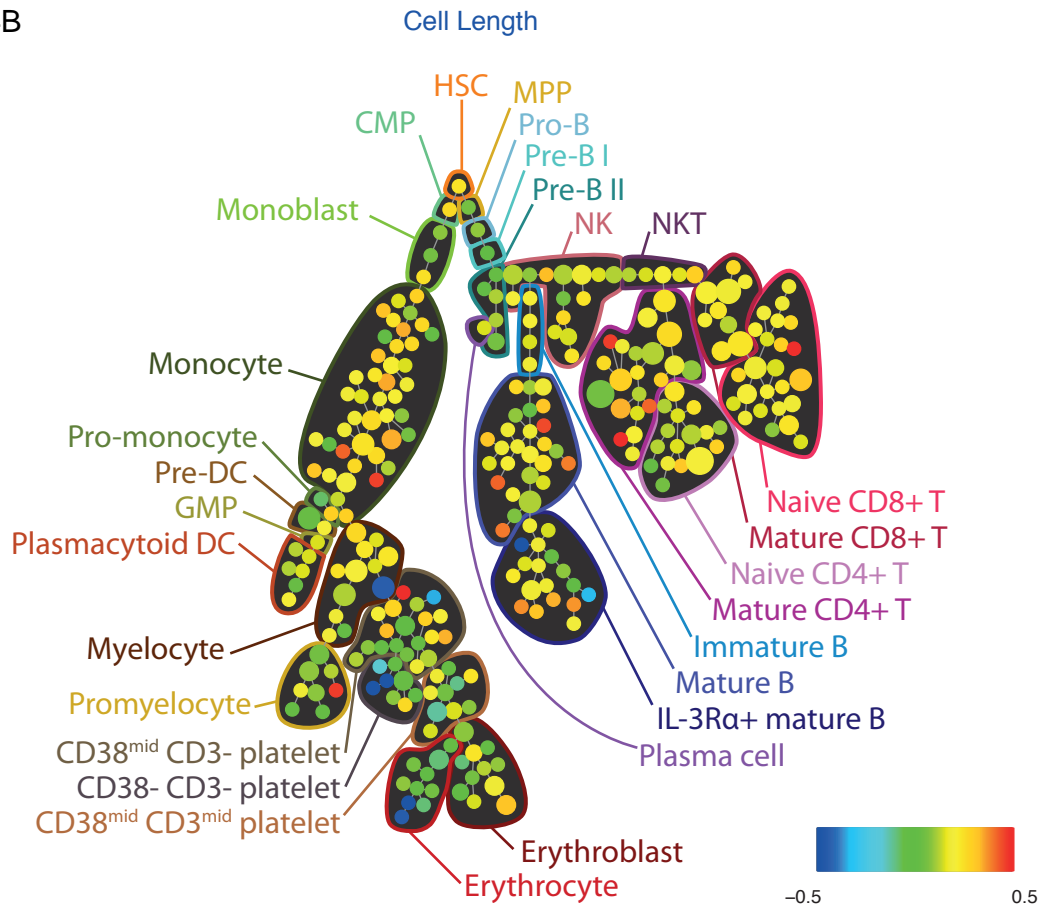

# Figure S5

Gating strategy for populations used in heatmaps  
(Figures 3, 5, S6, S7) and *t*-tests

Data shown from Marrow 1, Condition "Unstim1"

**Legend**

Population shown in plot

**Population name**  
*(from heatmap)*

Gate shown in plot

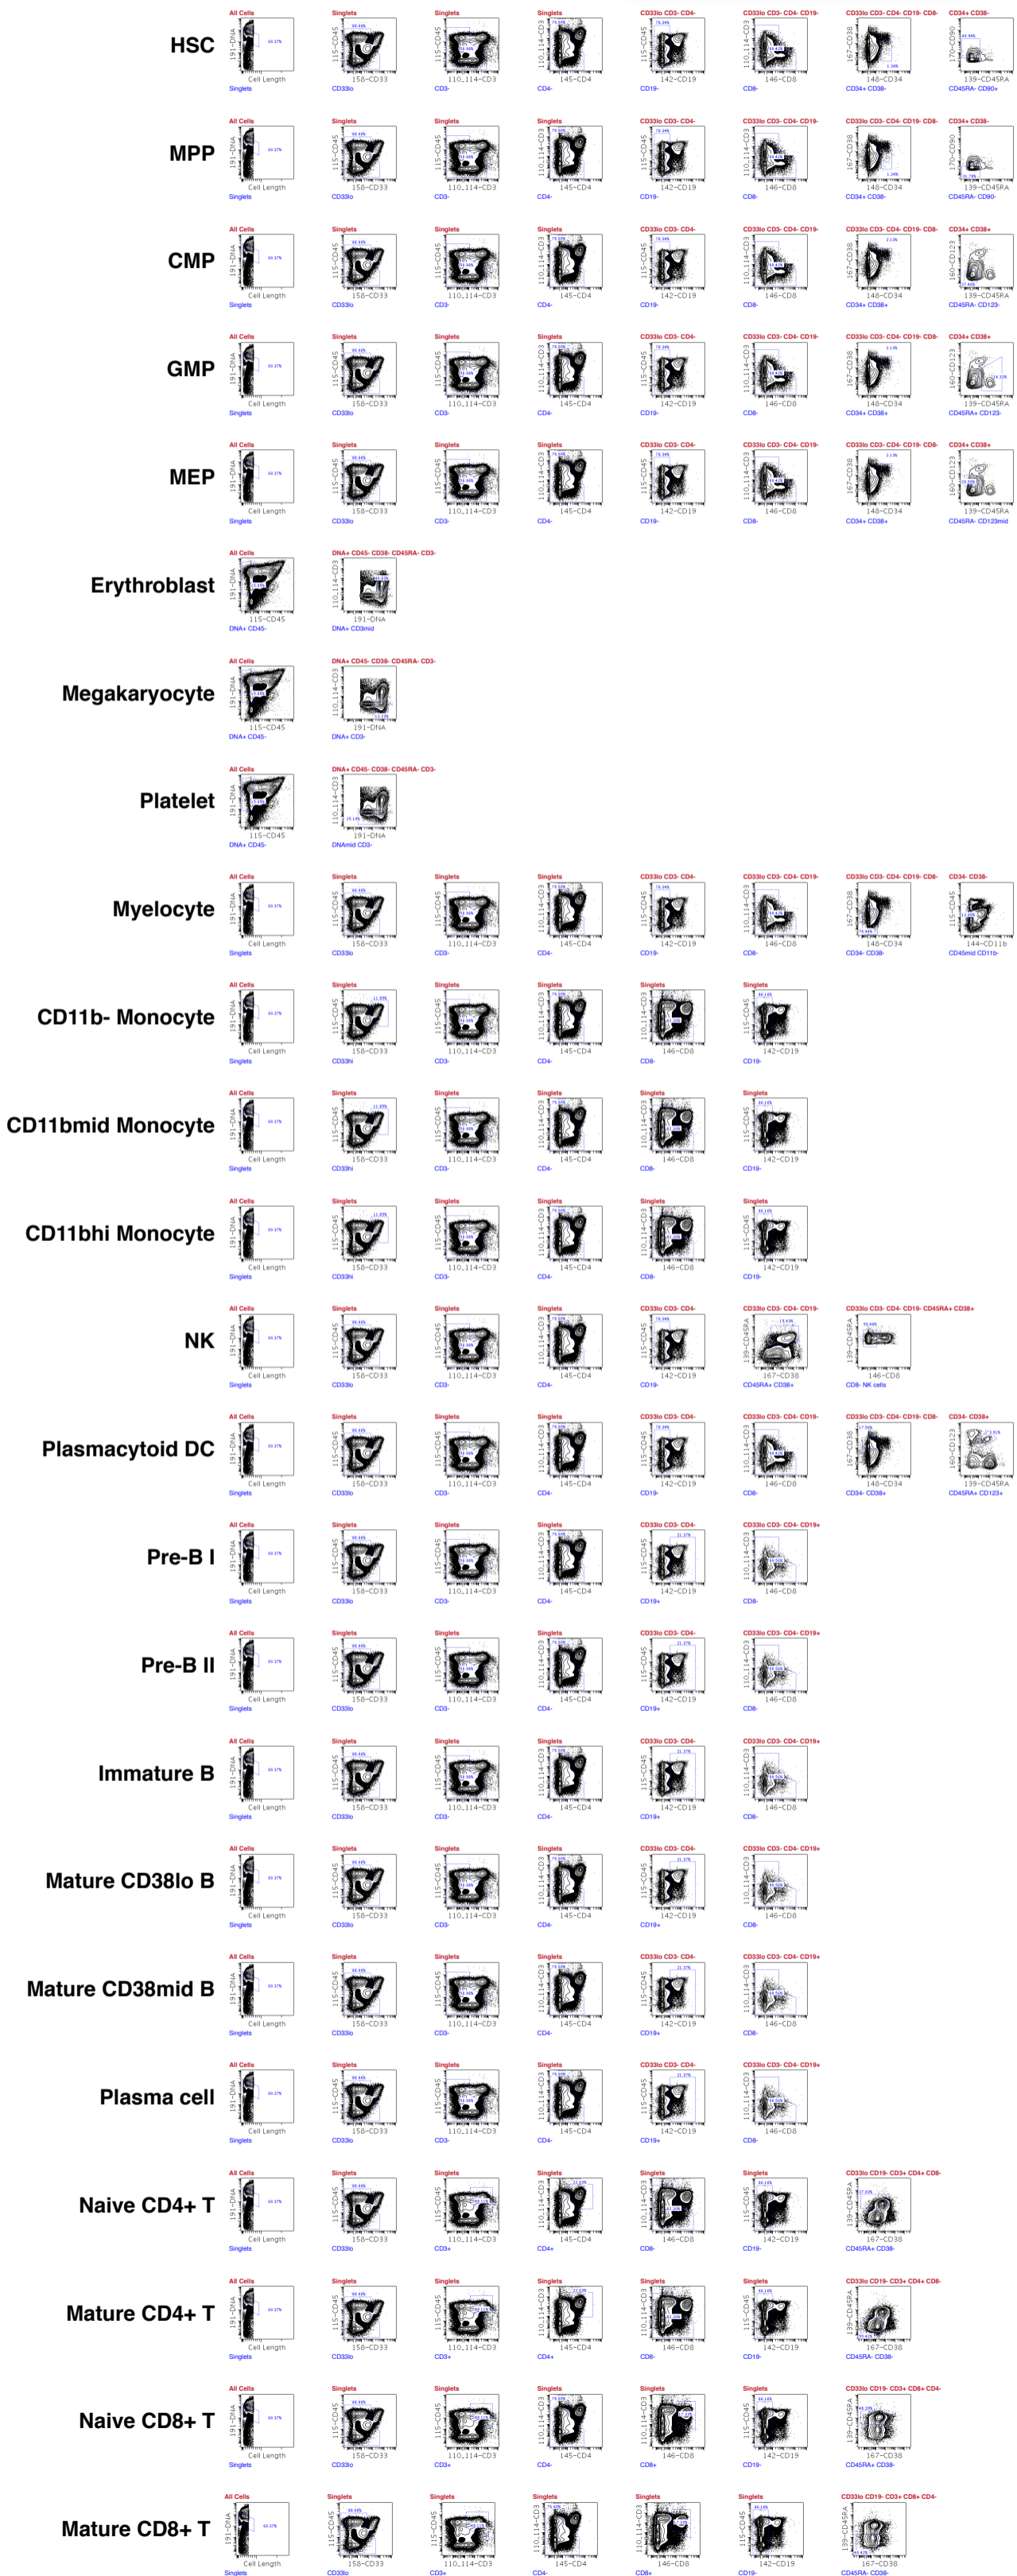

# Figure S6

A

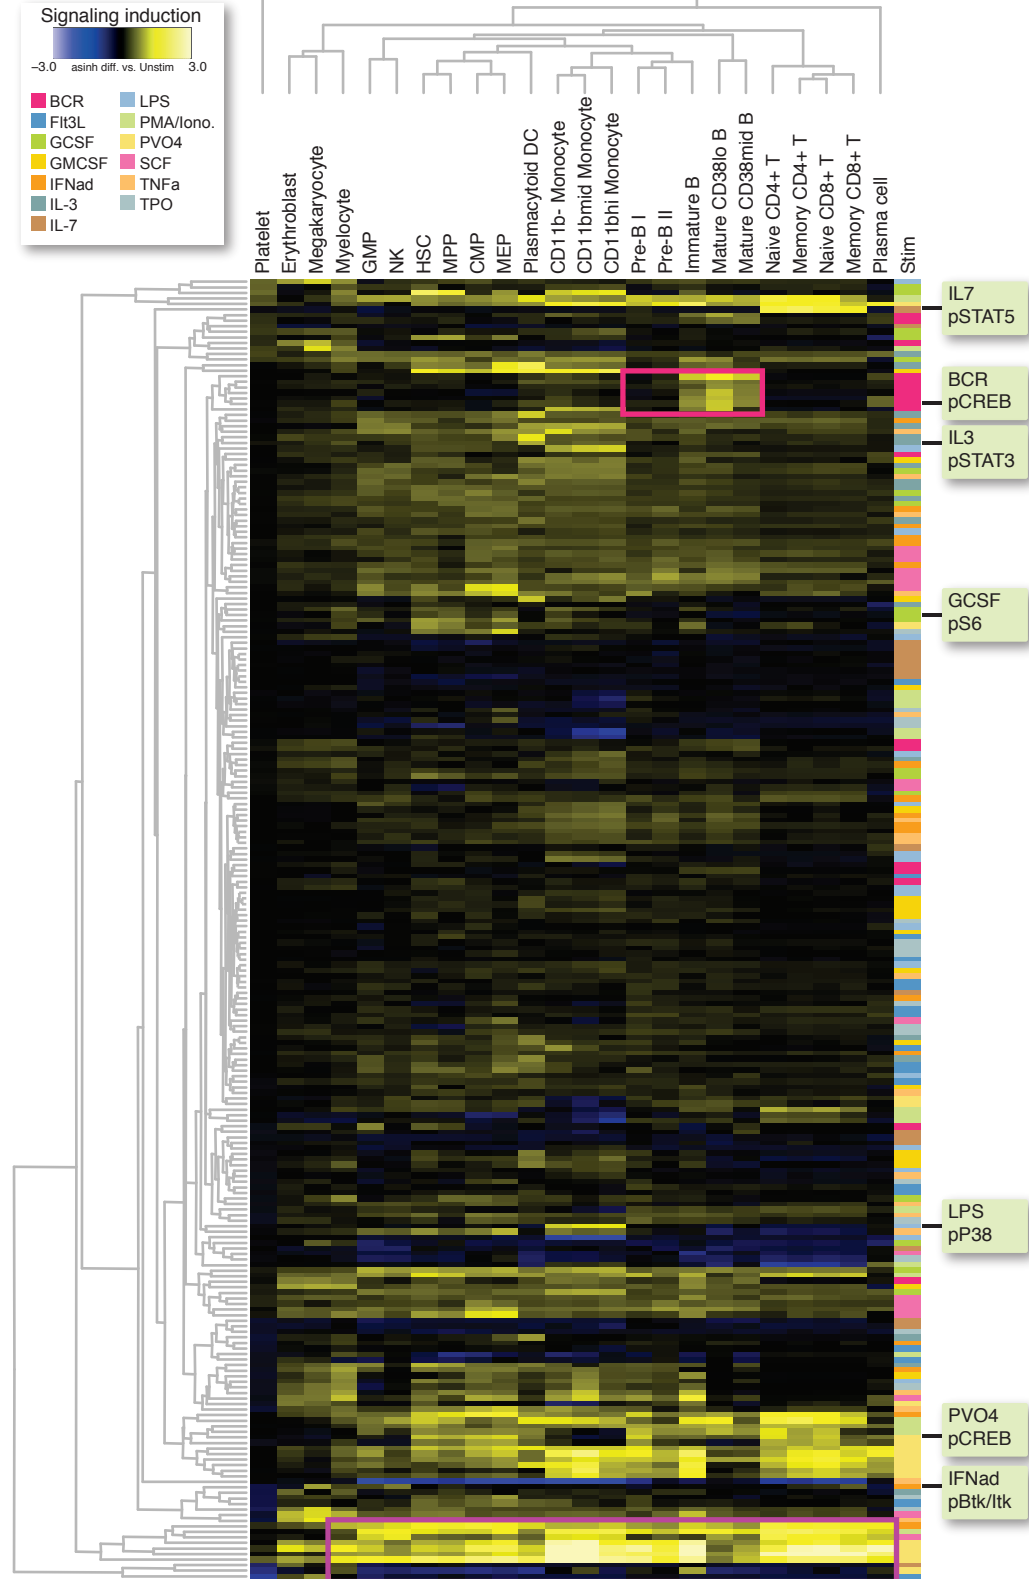

B

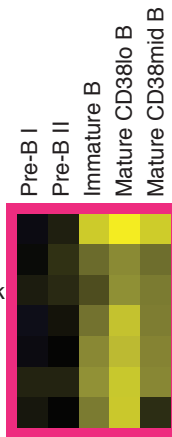

C

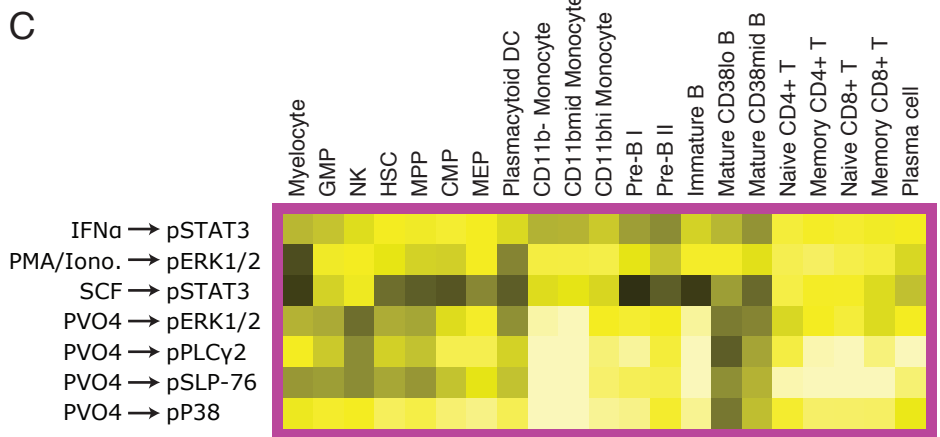

**Figure S7**

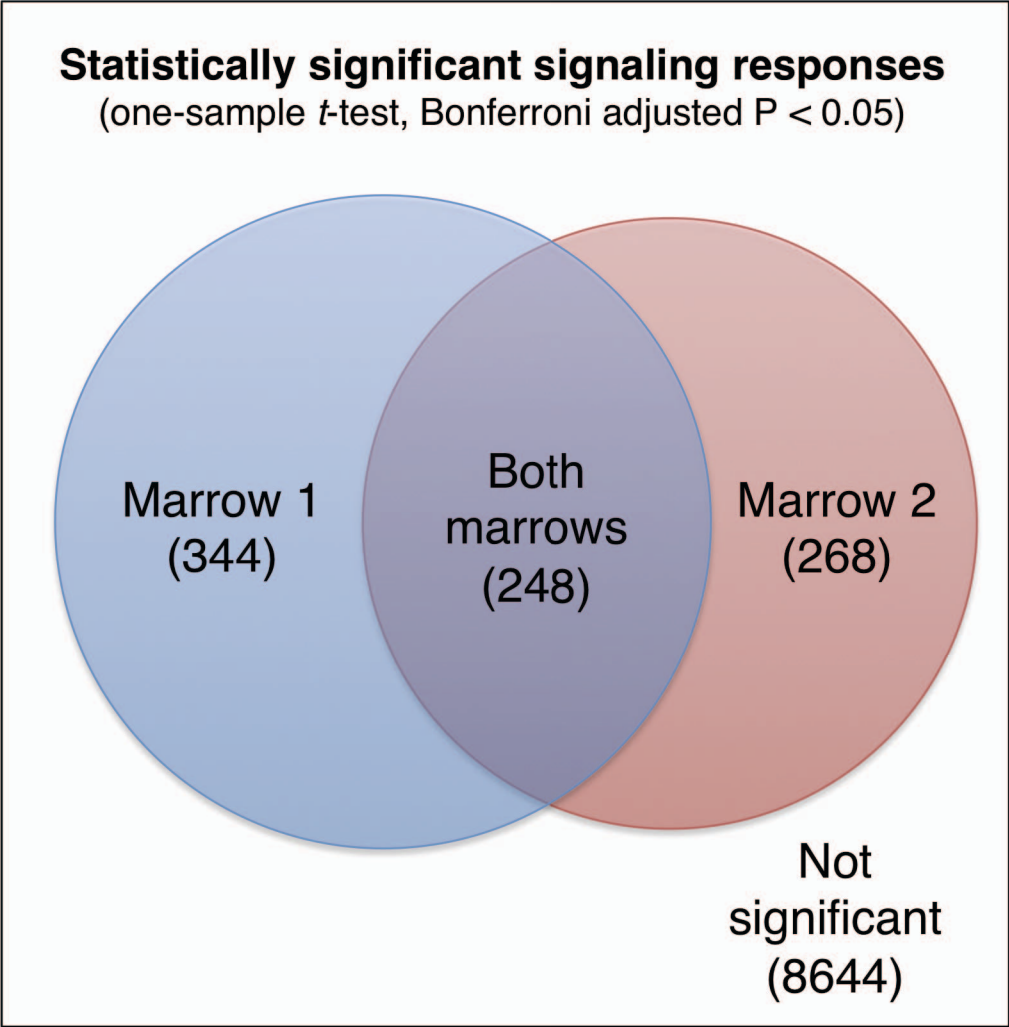



Figure S8A

141-pPLCgamma2 ---- BCR vs Ref Ratio

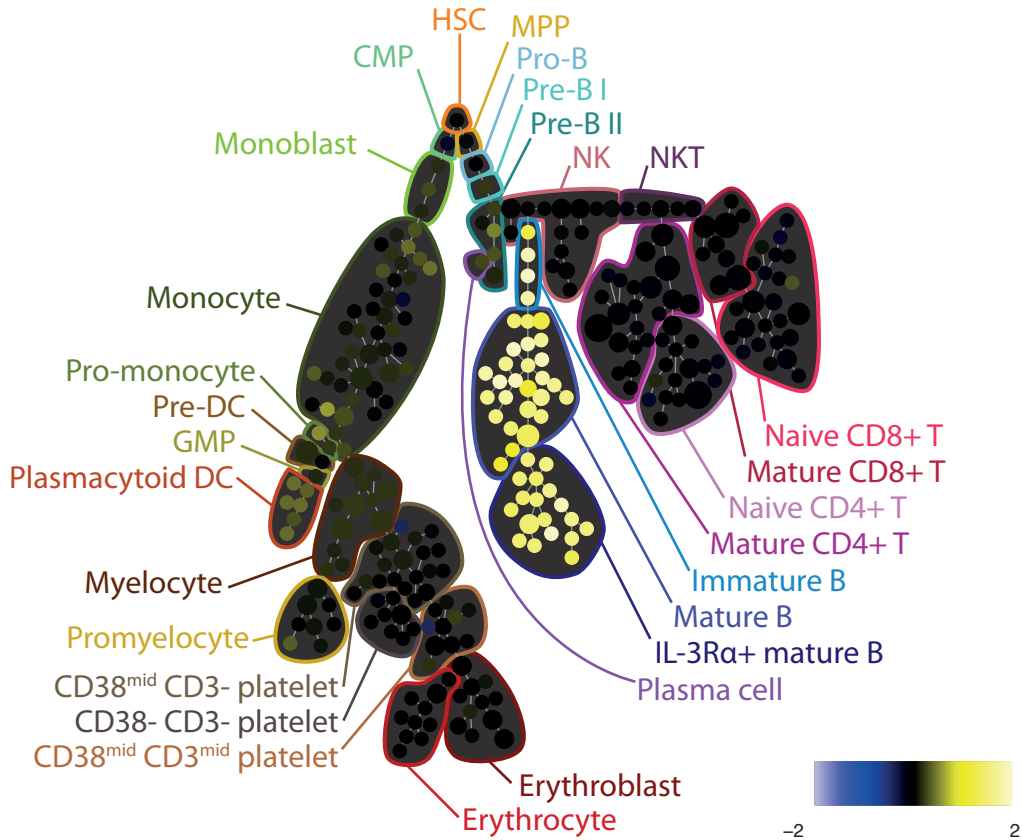

Figure S8A

141-pPLCgamma2 --- DMSO vs Ref Ratio

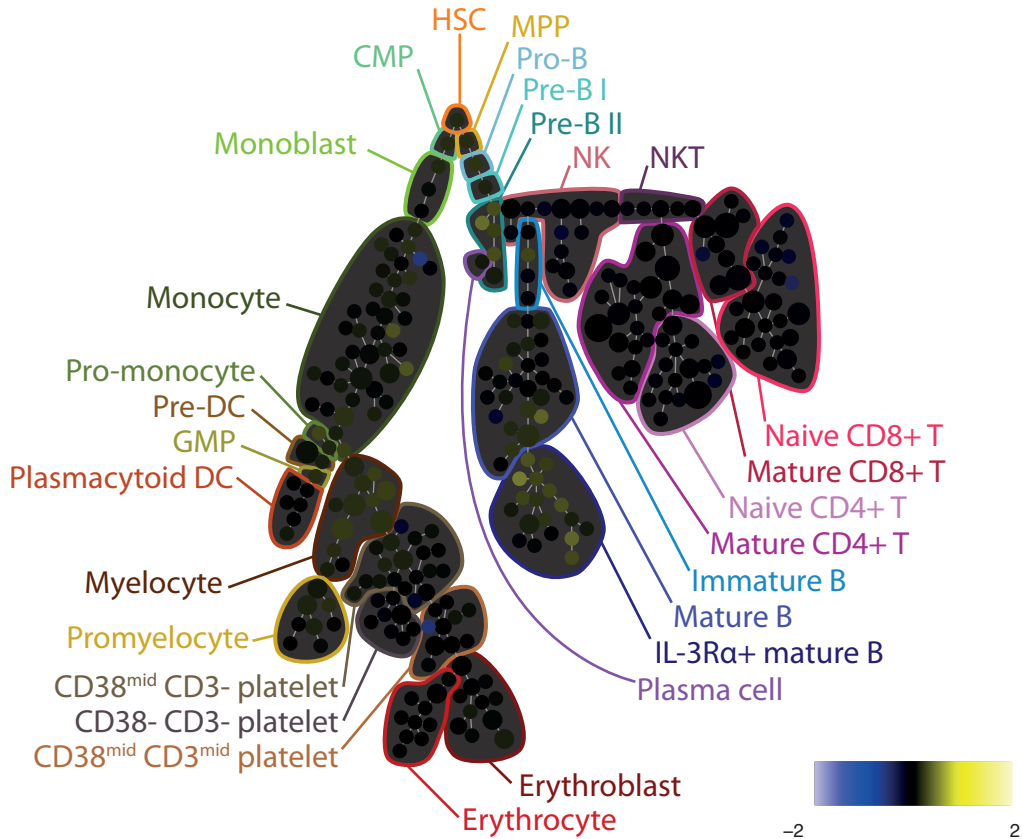

Figure S8A

141-pPLCgamma2 ---- Flt3L vs Ref Ratio

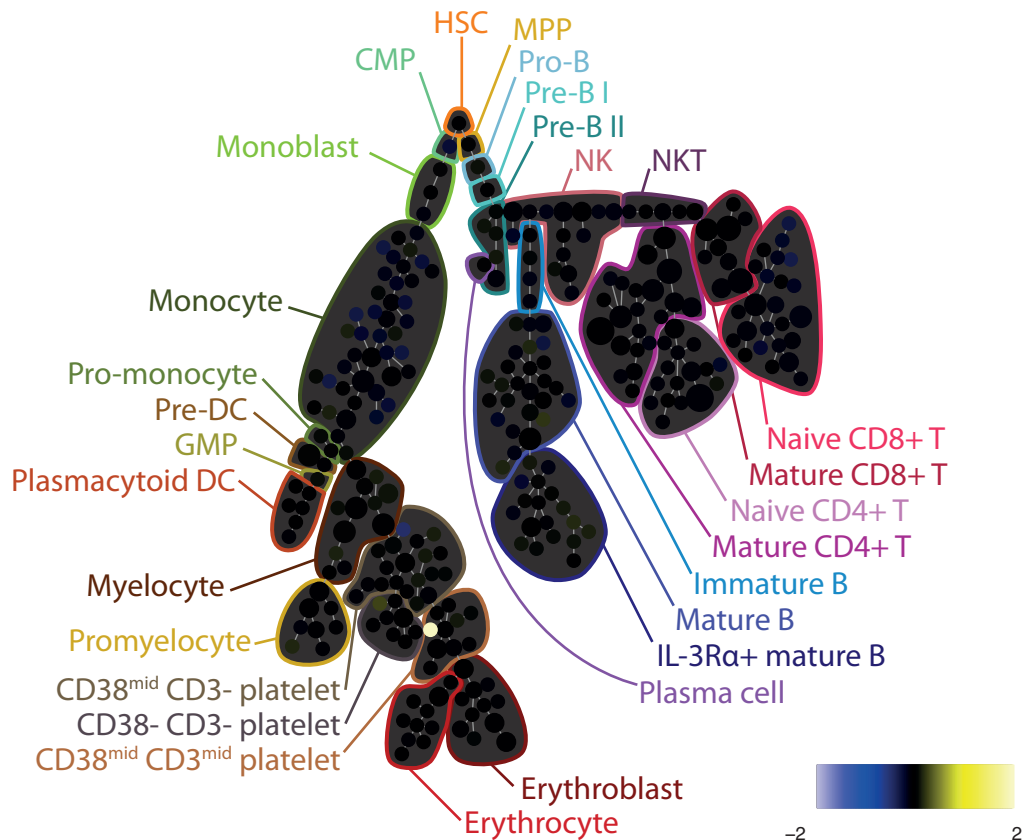

Figure S8A

141-pPLCgamma2 ---- GCSF vs Ref Ratio

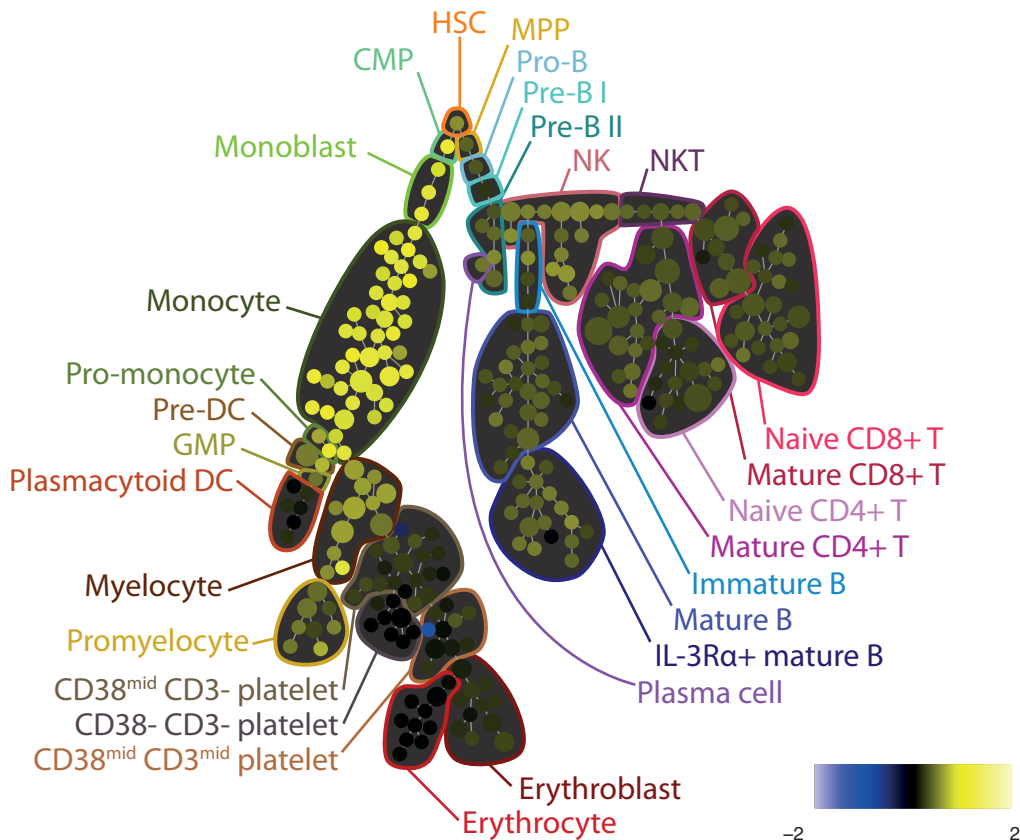

Figure S8A

141-pPLCgamma2 ---- GMCSF vs Ref Ratio

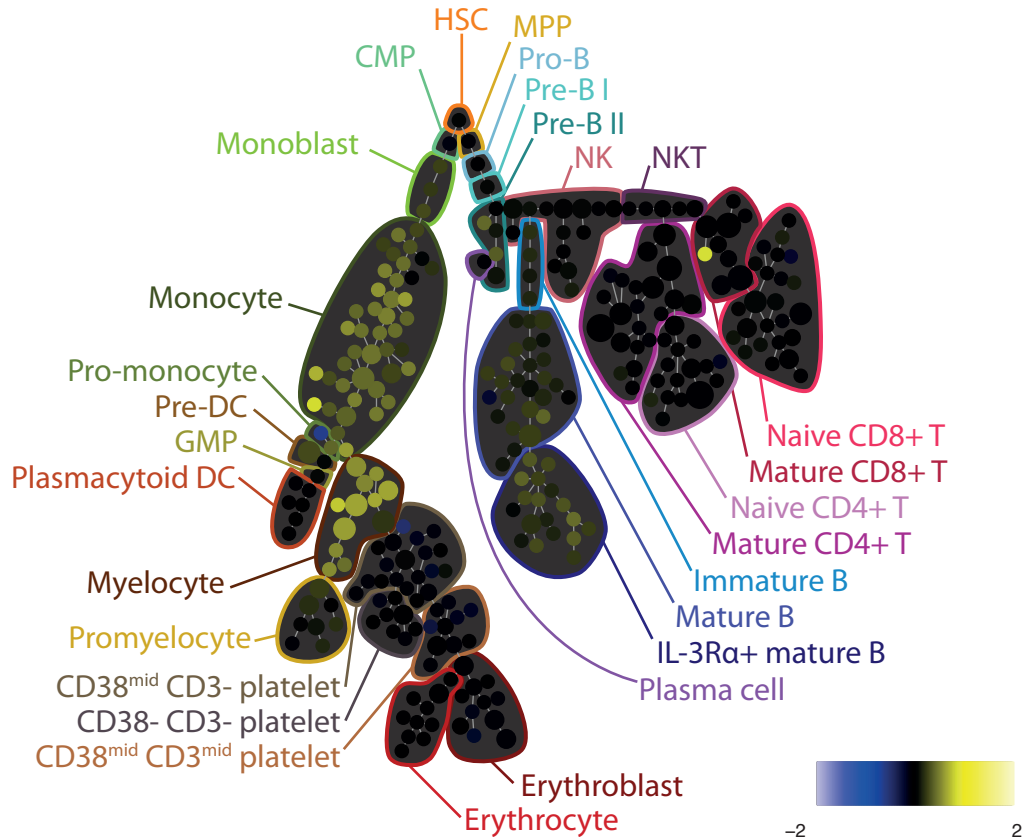

Figure S8A

141-pPLCgamma2 ---- IFNad vs Ref Ratio

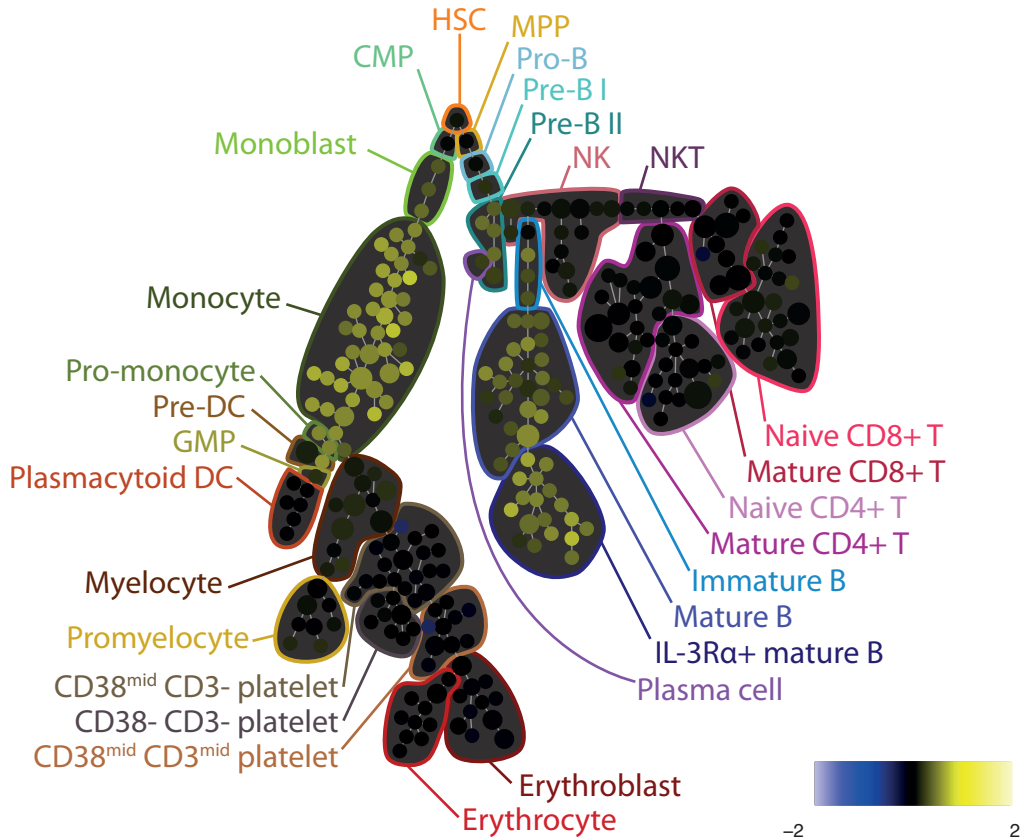

Figure S8A

141-pPLCgamma2 ---- IL3 vs Ref Ratio

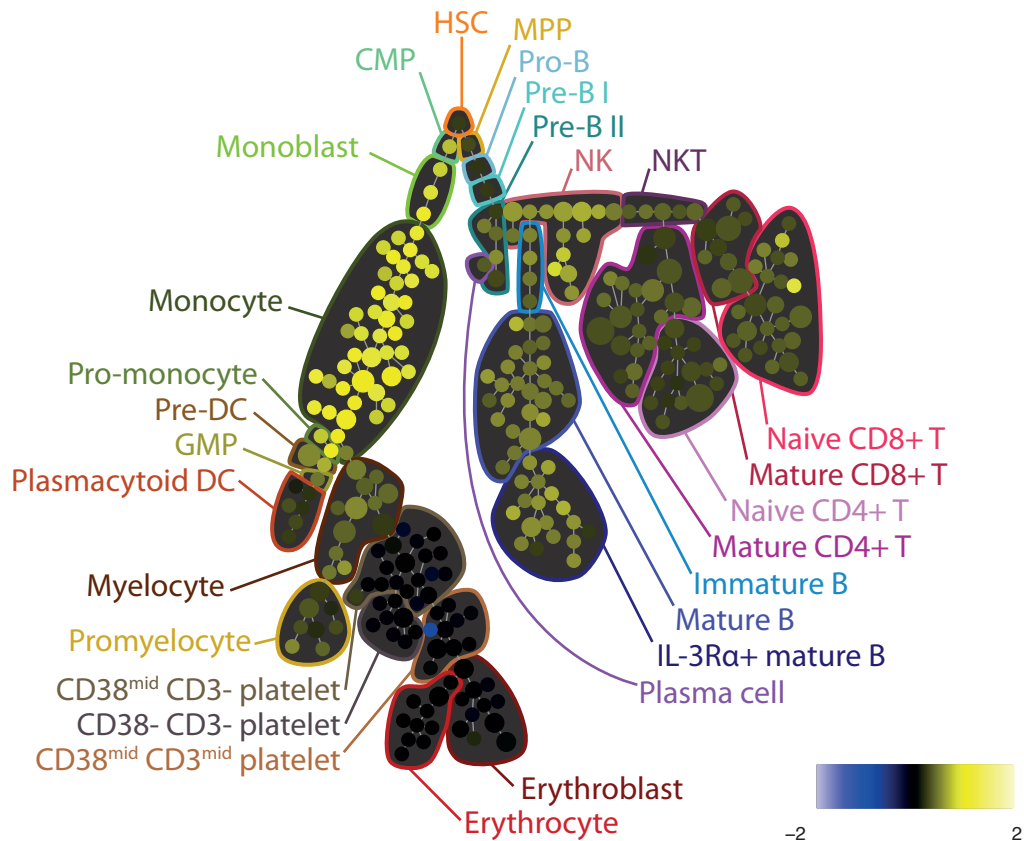

Figure S8A

141-pPLCgamma2 ---- IL7 vs Ref Ratio

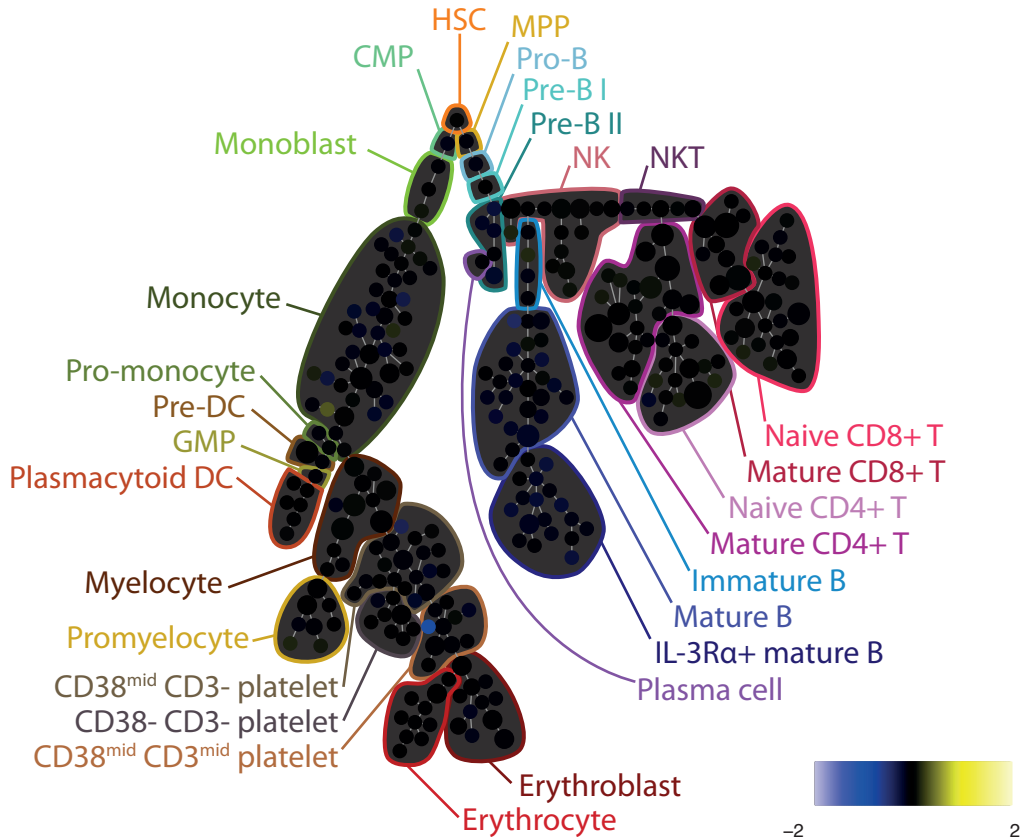



Figure S8A

141-pPLCgamma2 ---- LPS vs Ref Ratio

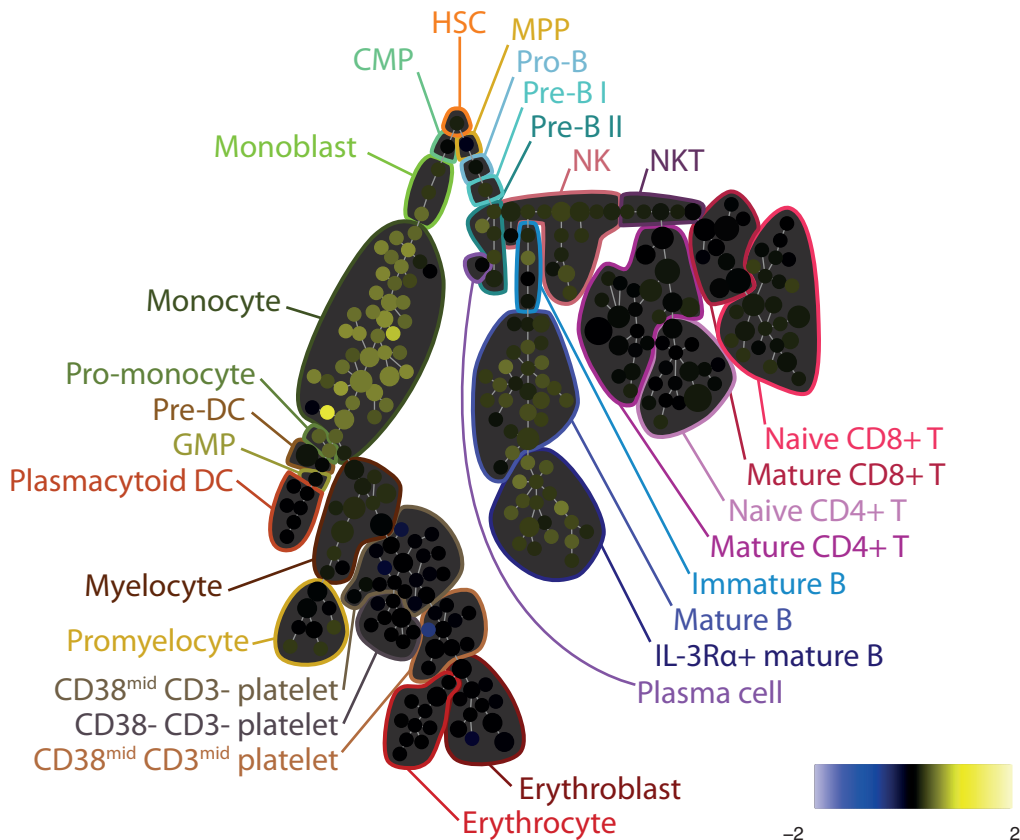

Figure S8A

141-pPLCGamma2 --- PMAiono vs Ref Ratio

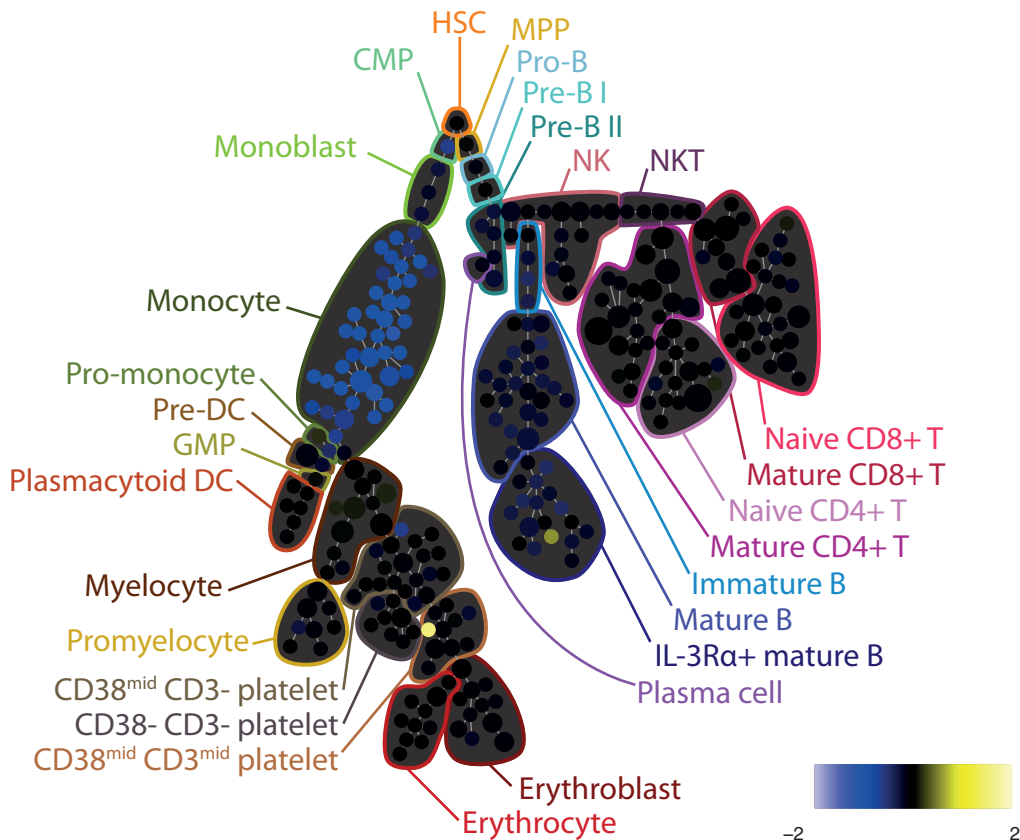

Figure S8A

141-pPLCgamma2 ---- PVO4 vs Ref Ratio

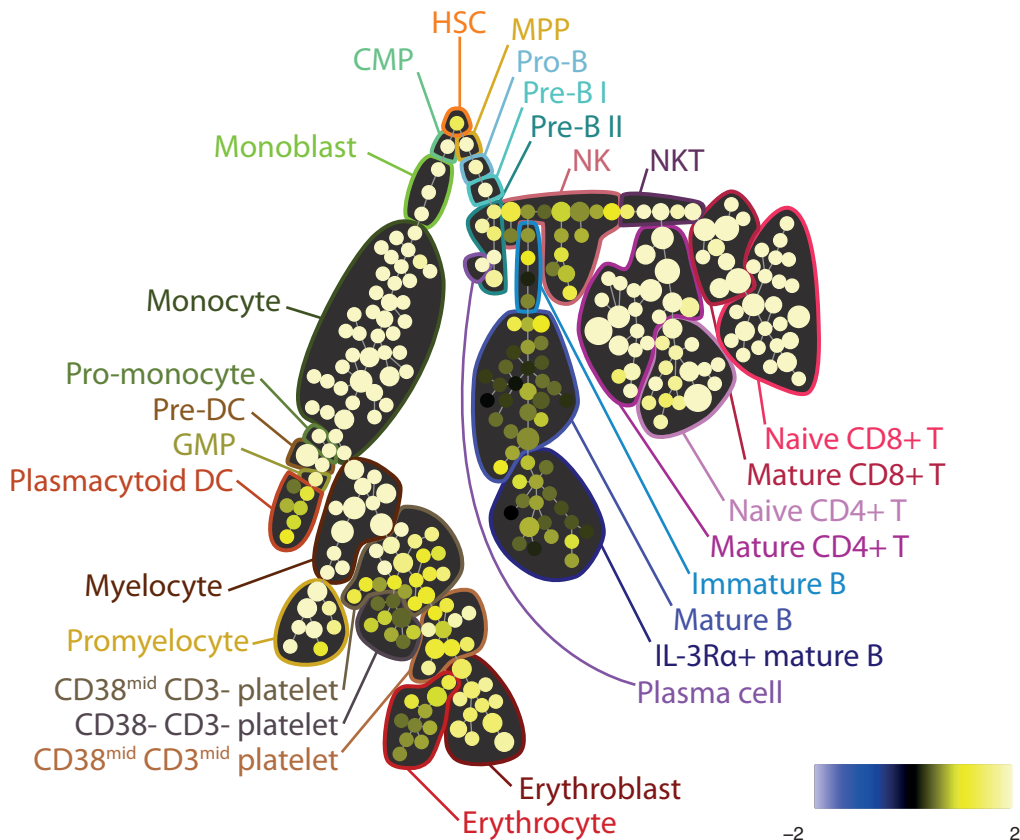

Figure S8A

141-pPLCgamma2 ---- SCF vs Ref Ratio

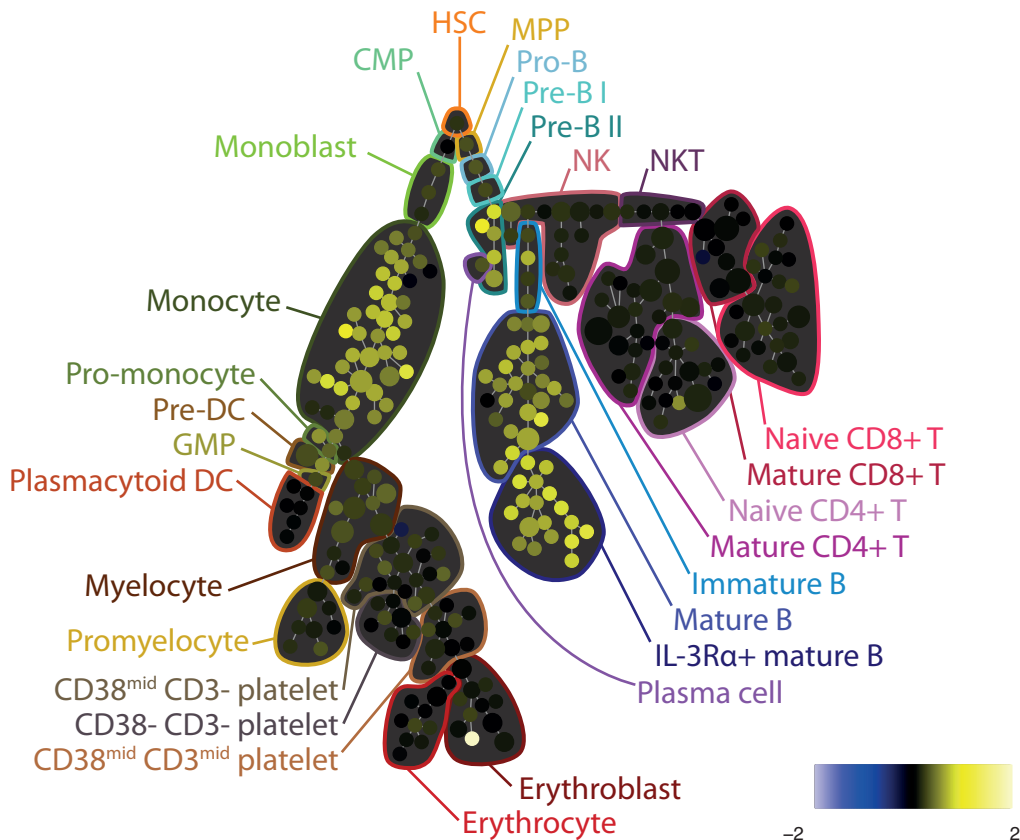

Figure S8A

141-pPLCgamma2 ---- TNFa vs Ref Ratio

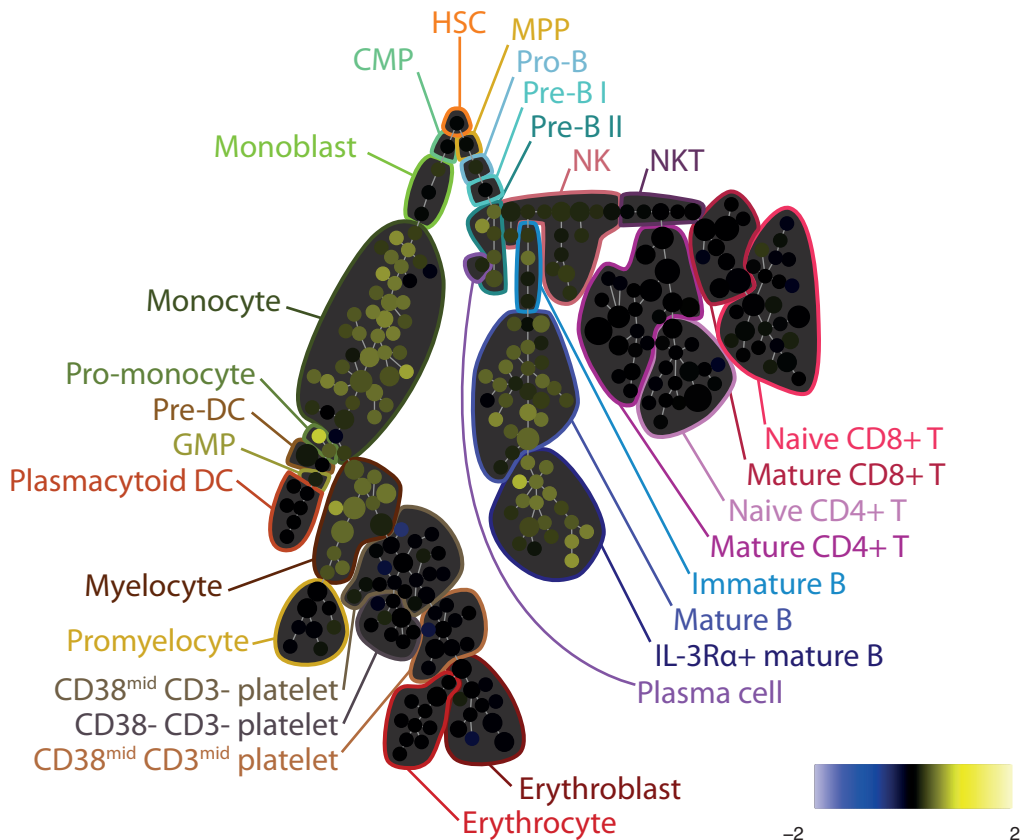

Figure S8A

141-pPLCGamma2 ---- TPO vs Ref Ratio

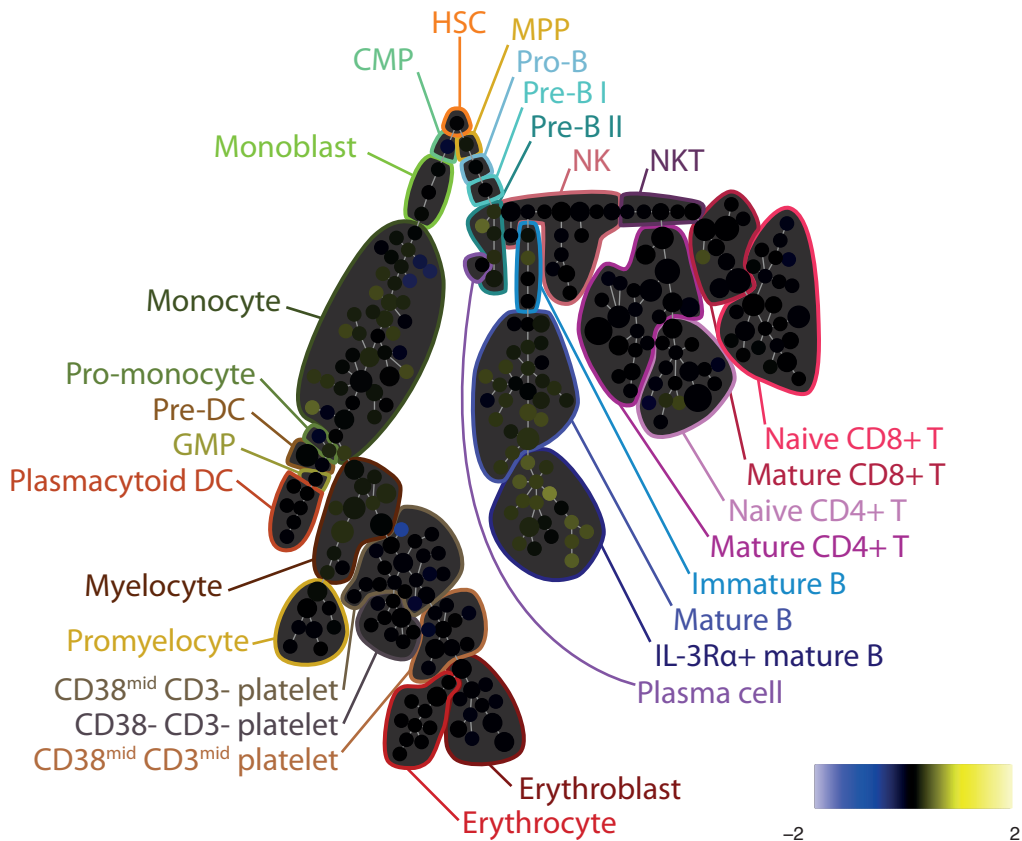

Figure S8A

150-pSTAT5 ---- BCR vs Ref Ratio

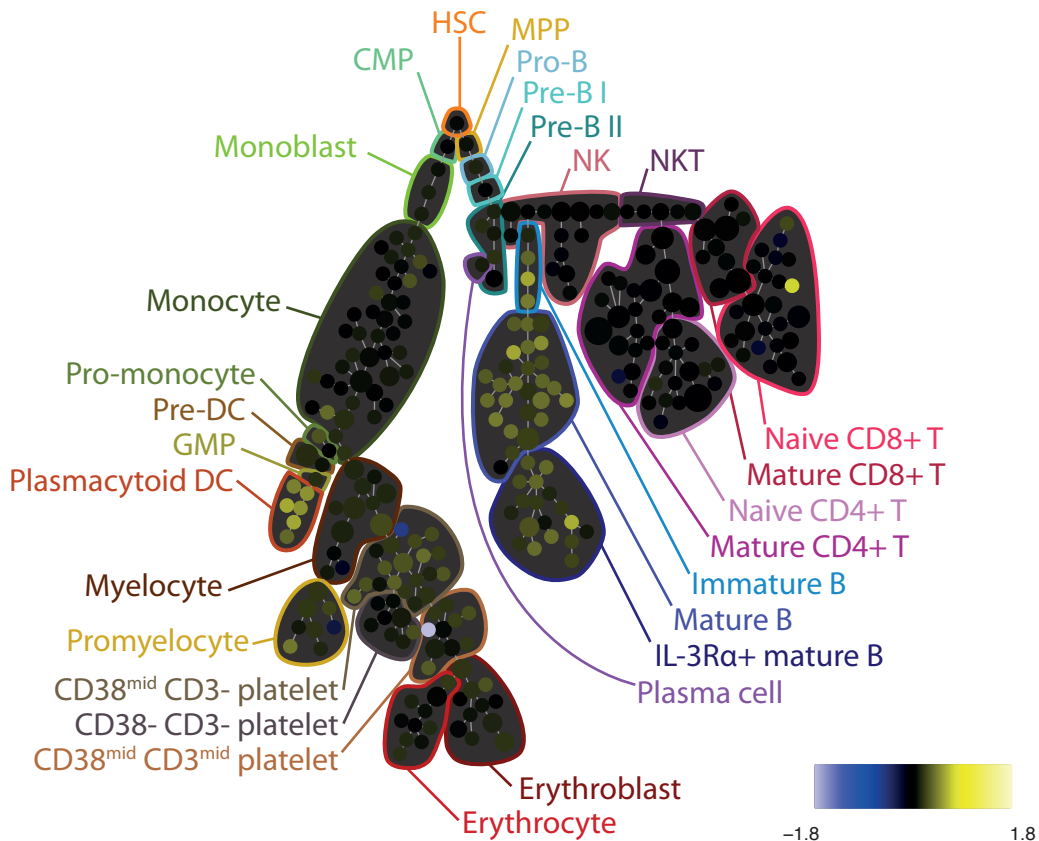

Figure S8A

150-pSTAT5 ---- DMSO vs Ref Ratio

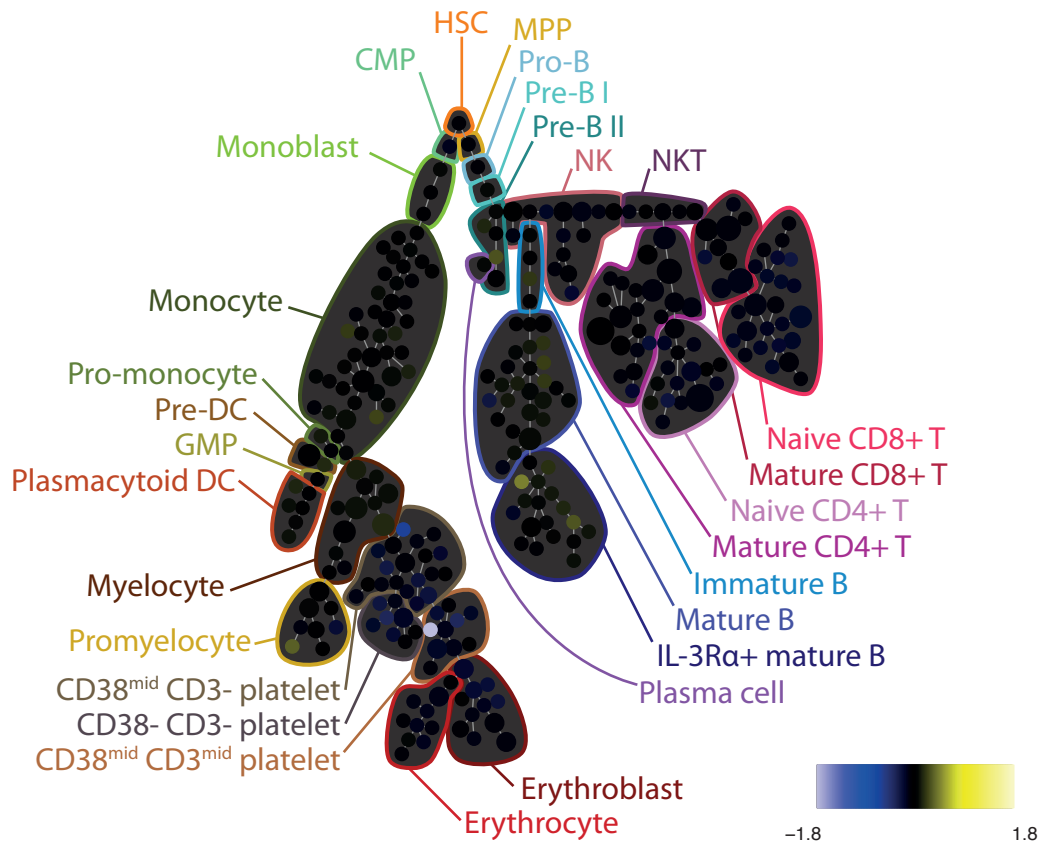



Figure S8A

150-pSTAT5 ---- Flt3L vs Ref Ratio

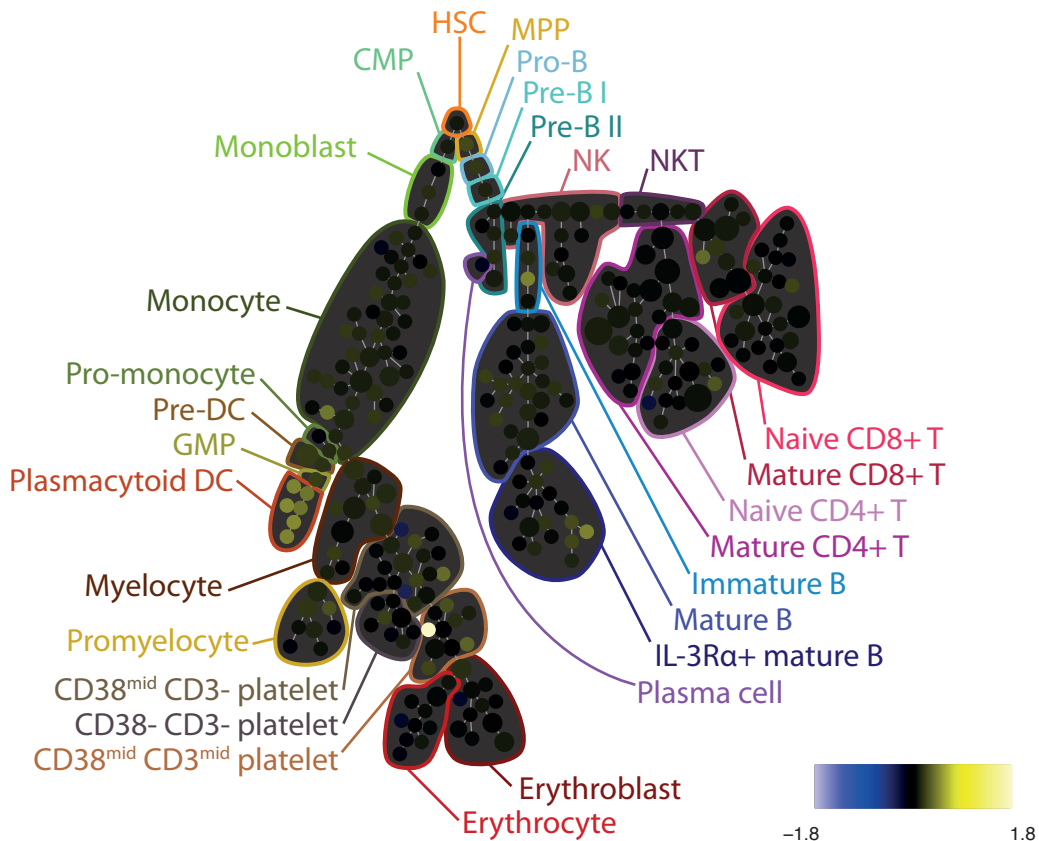

Figure S8A

150-pSTAT5 ---- GCSF vs Ref Ratio

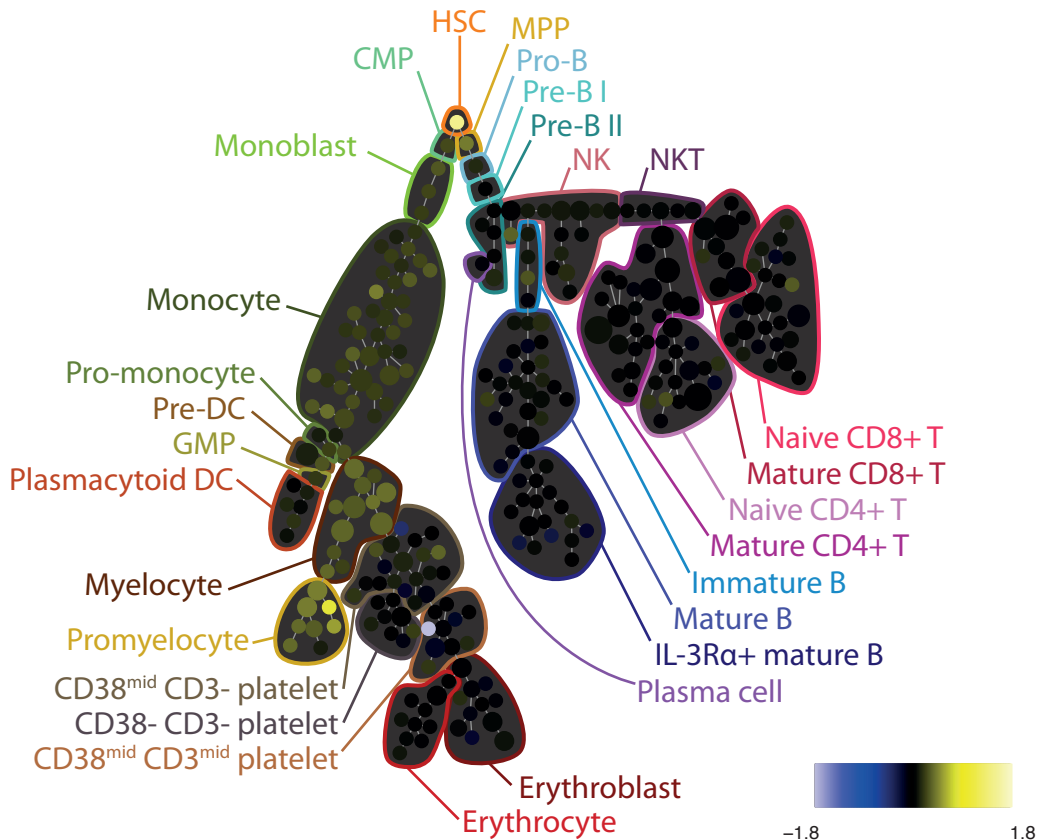

Figure S8A

150-pSTAT5 ---- GMCSF vs Ref Ratio

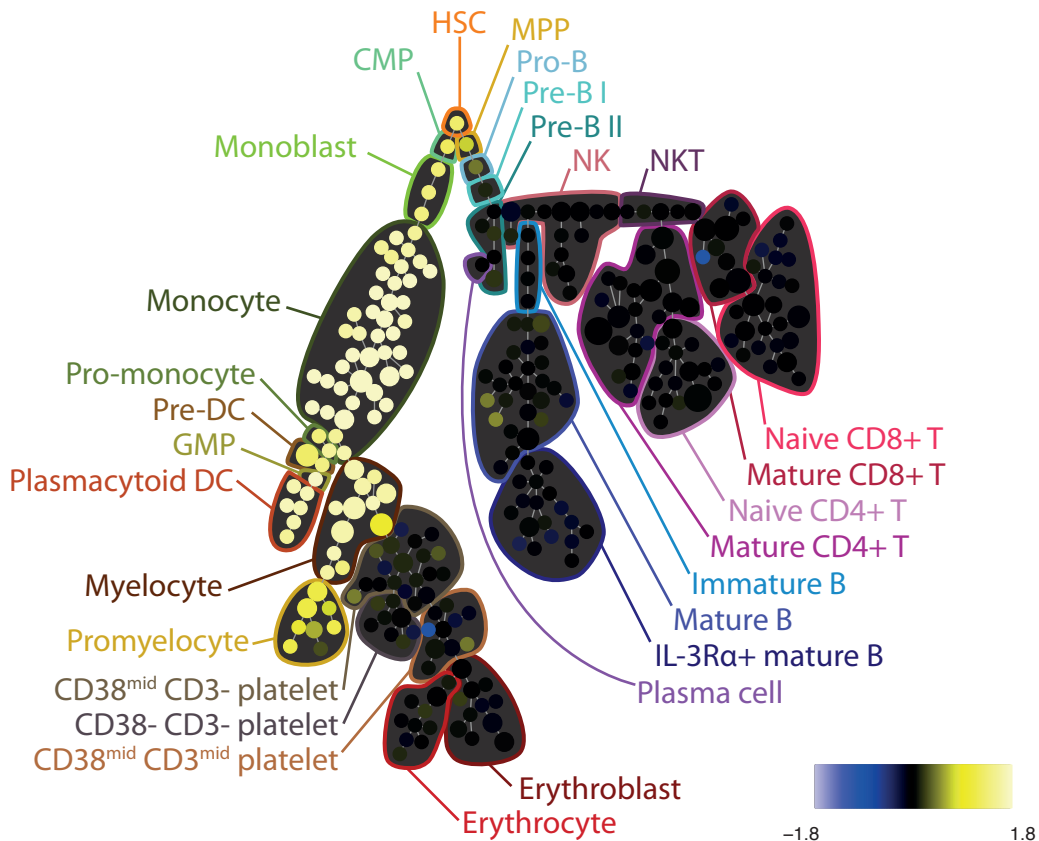

Figure S8A

150-pSTAT5 ---- IFNad vs Ref Ratio

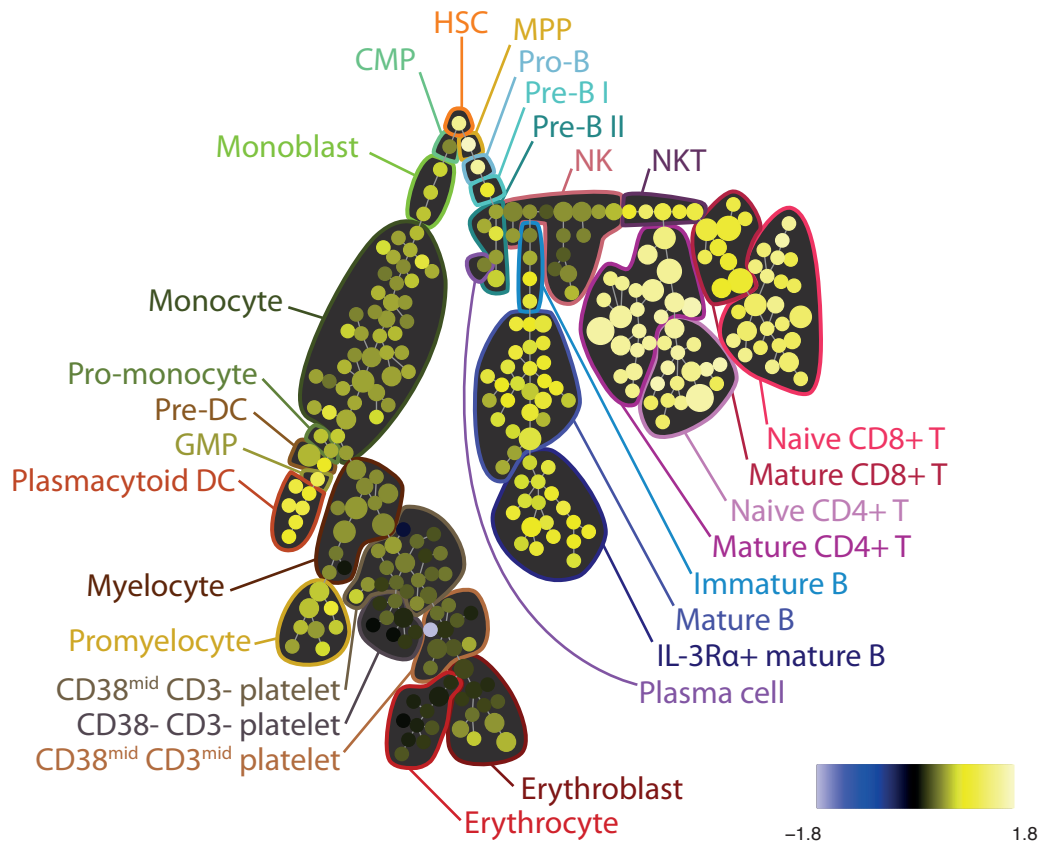

Figure S8A

150-pSTAT5 ---- IL3 vs Ref Ratio

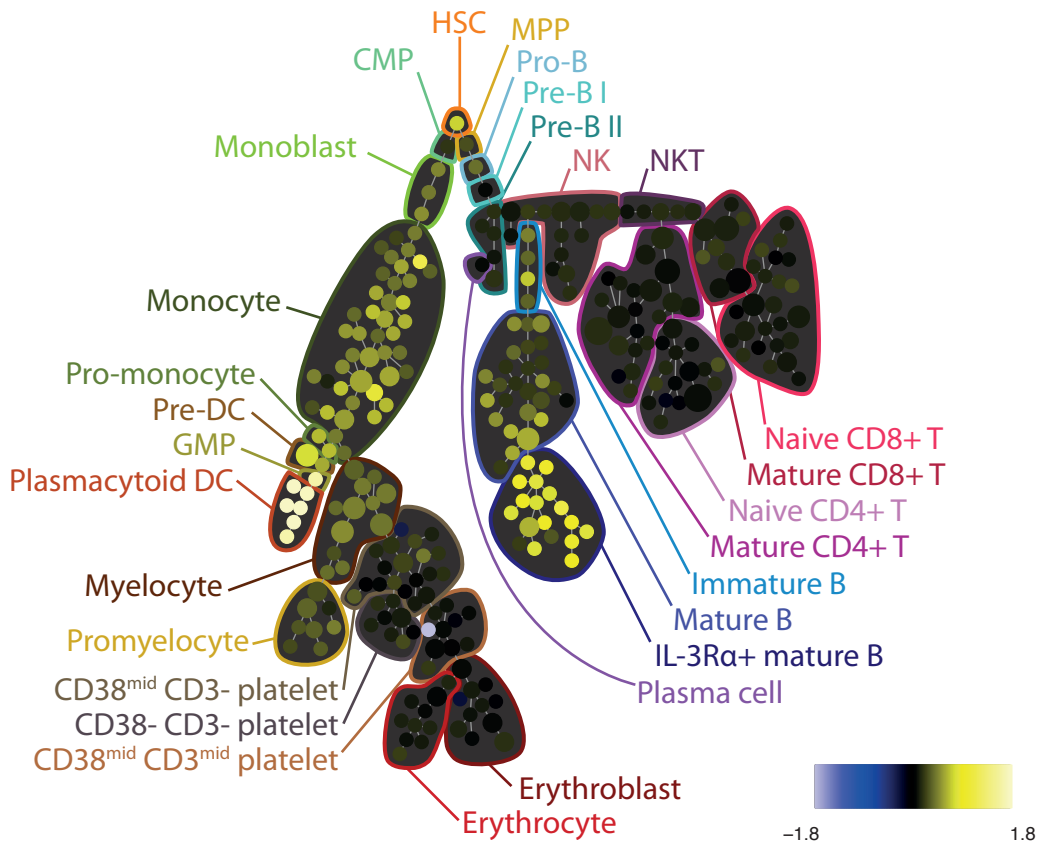

Figure S8A

150-pSTAT5 ---- IL7 vs Ref Ratio

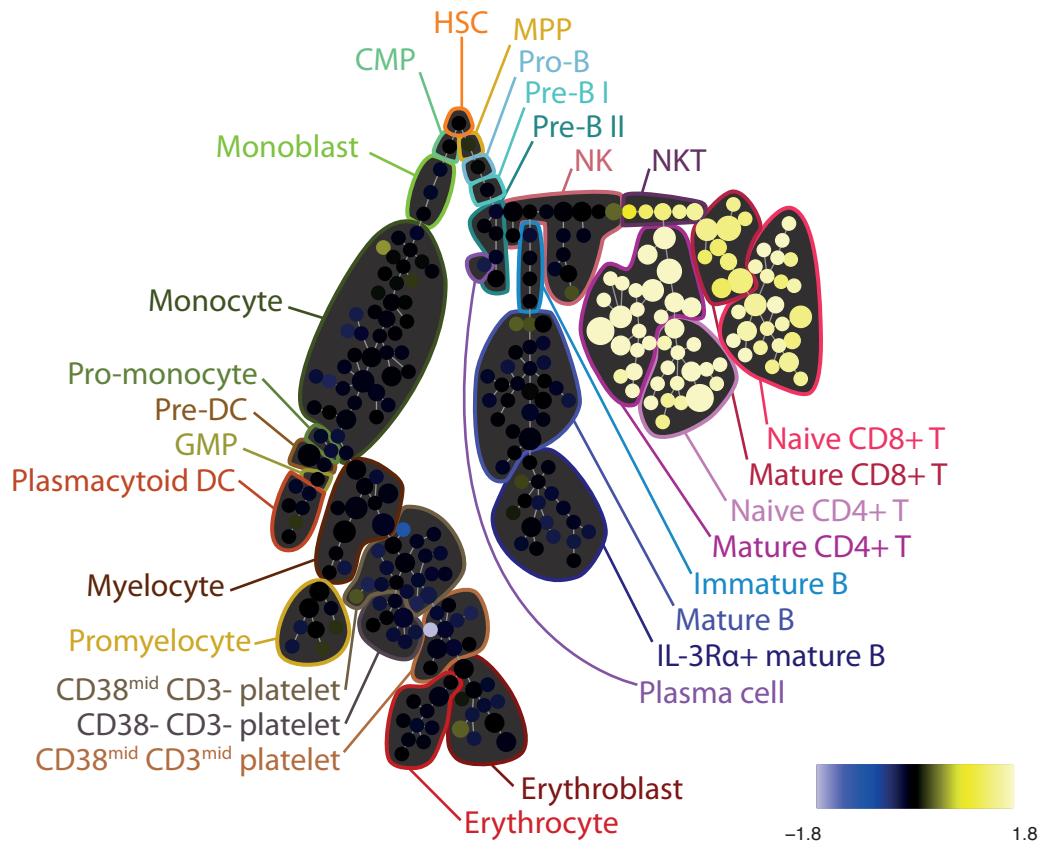

Figure S8A

150-pSTAT5 ---- LPS vs Ref Ratio

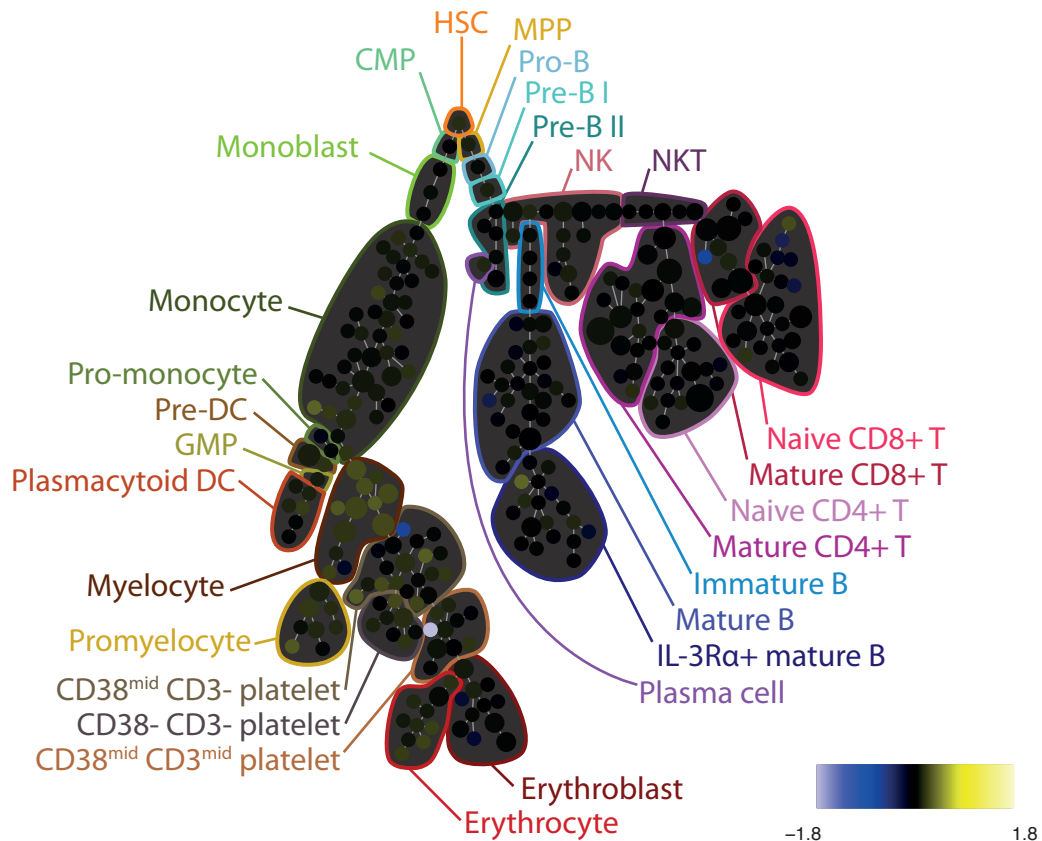

Figure S8A

150-pSTAT5 ---- PMAi on vs Ref Ratio

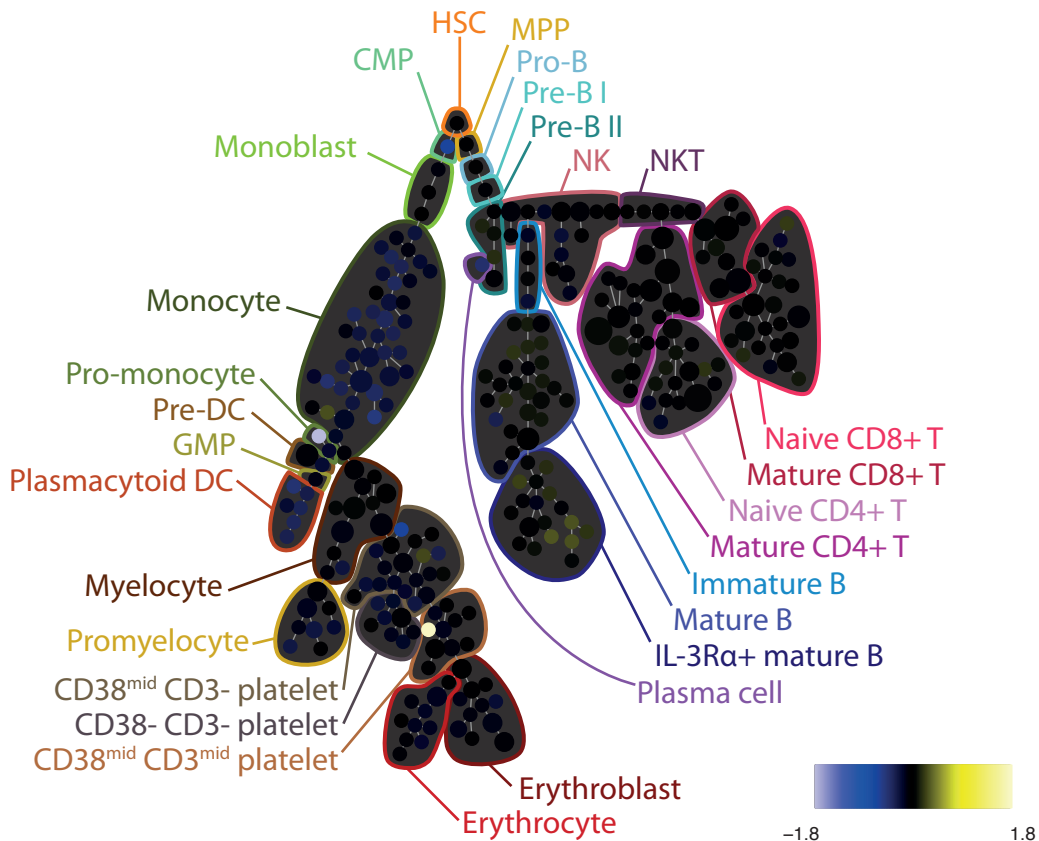



Figure S8A

150-pSTAT5 ---- PVO4 vs Ref Ratio

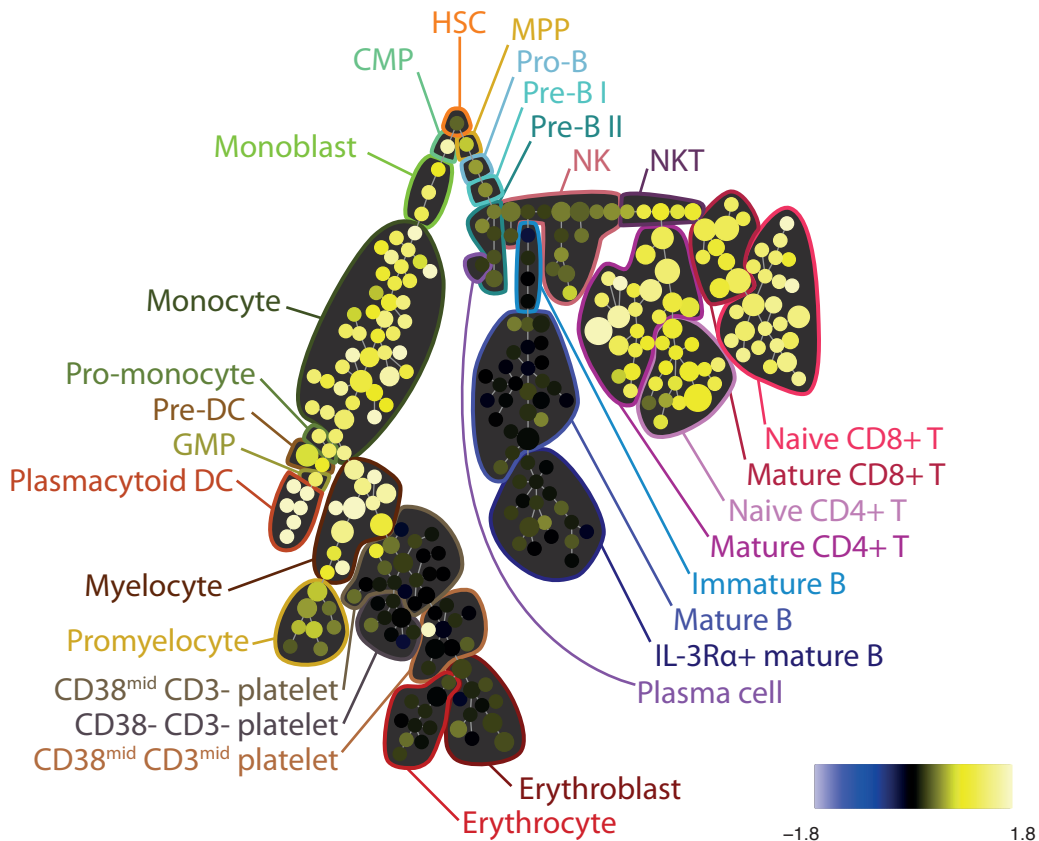

Figure S8A

150-pSTAT5 ---- SCF vs Ref Ratio

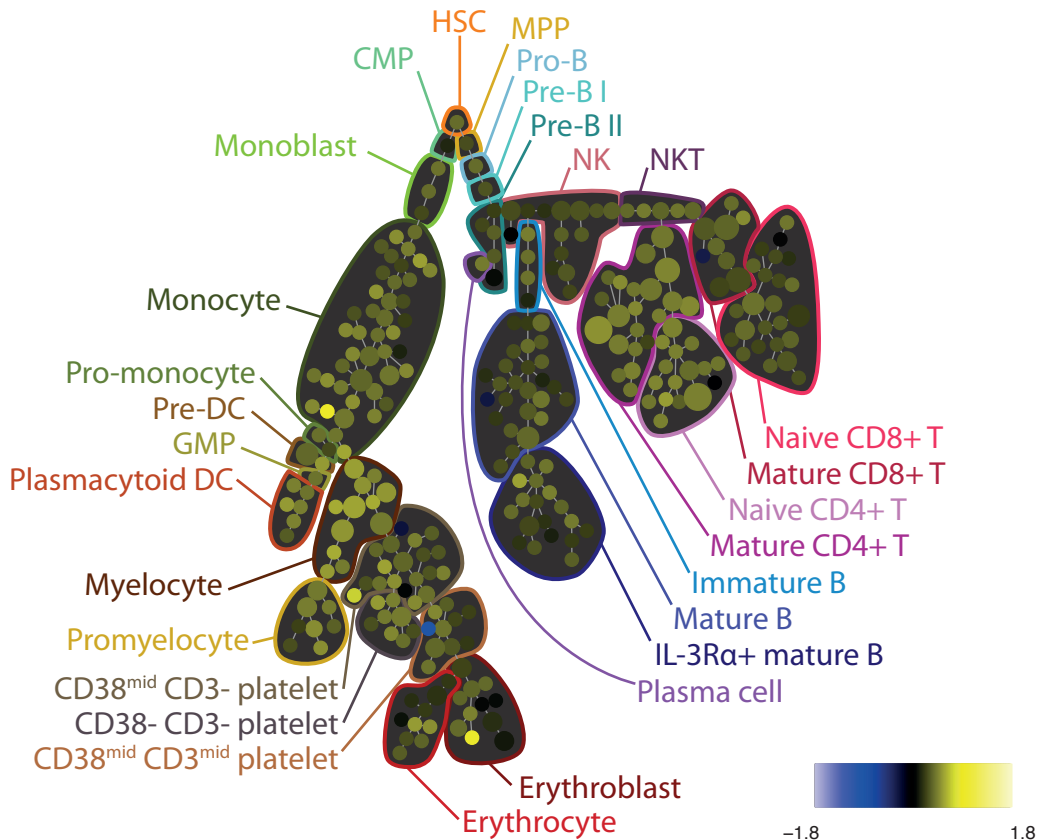

Figure S8A

150-pSTAT5 ---- TNFa vs Ref Ratio

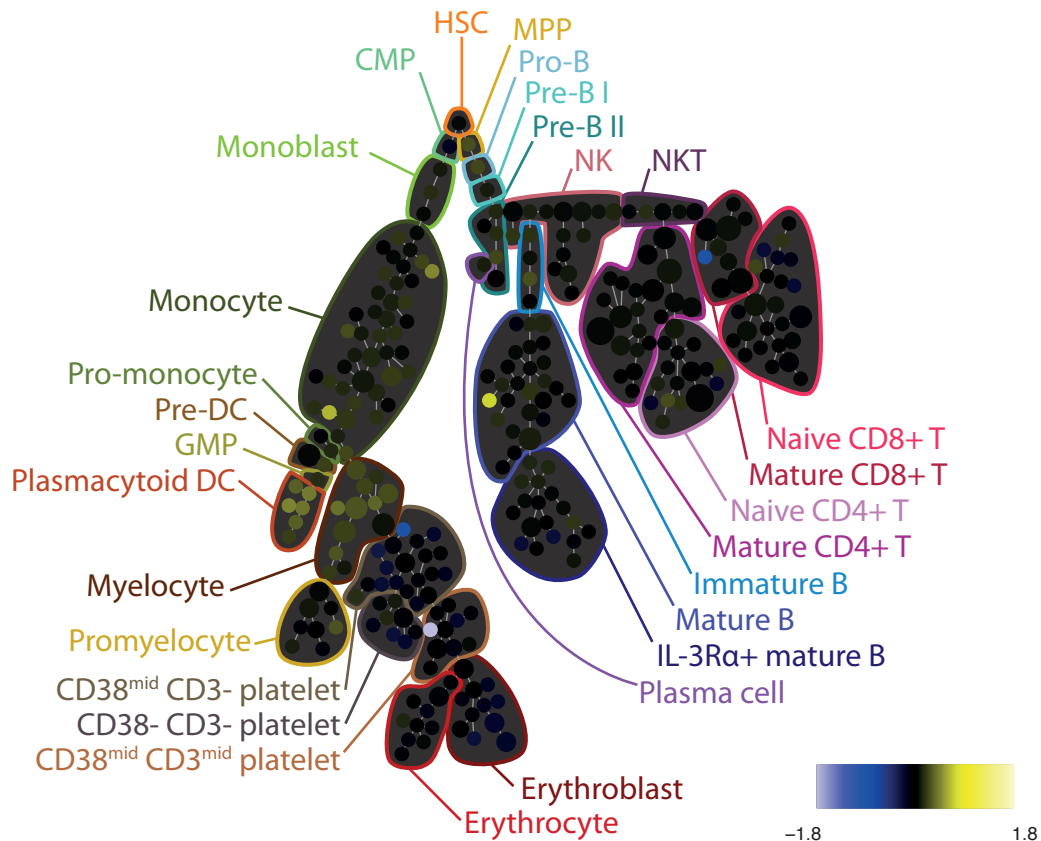

Figure S8A

150-pSTAT5 ---- TPO vs Ref Ratio

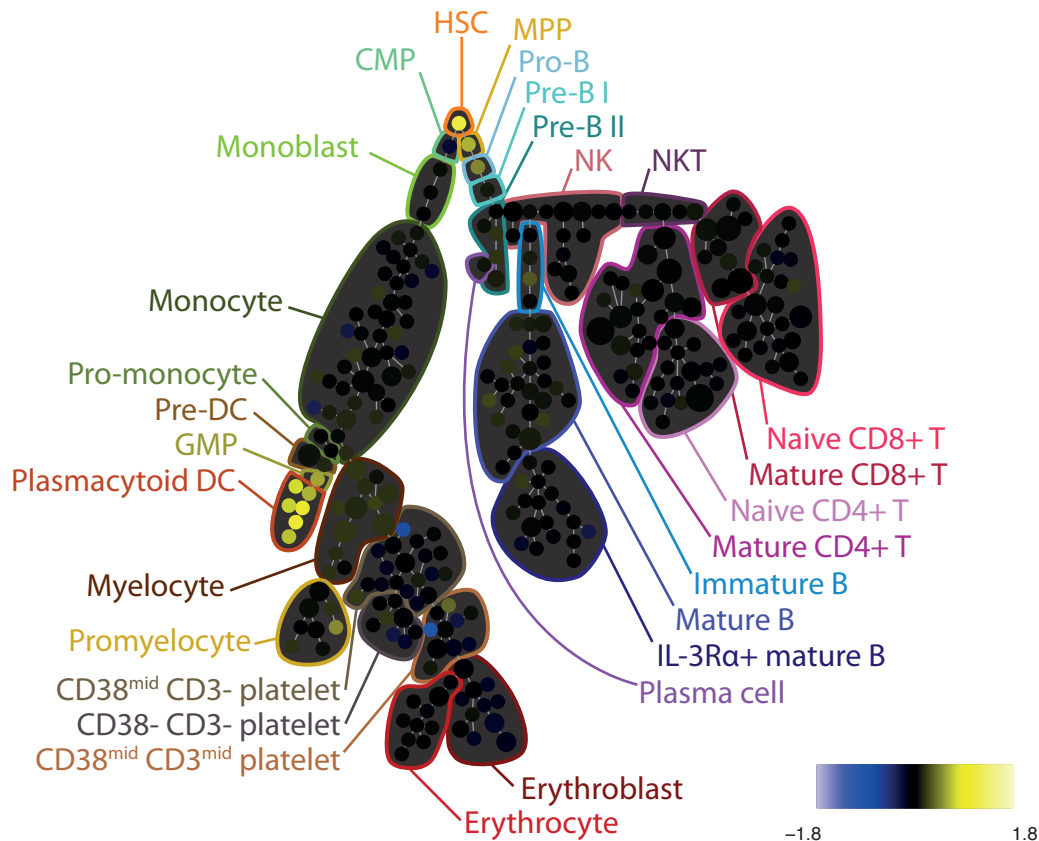

Figure S8A

151-pERK1/2 ---- BCR vs Ref Ratio

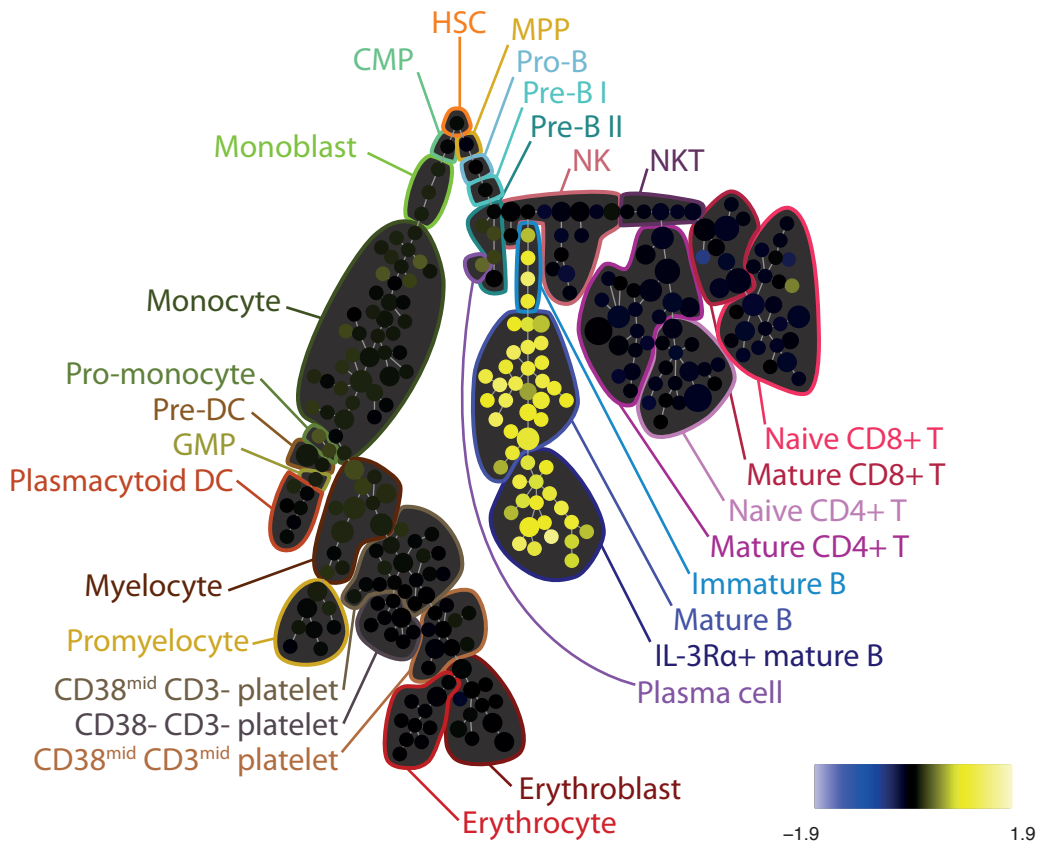

Figure S8A

151-pERK1/2 --- DMSO vs Ref Ratio

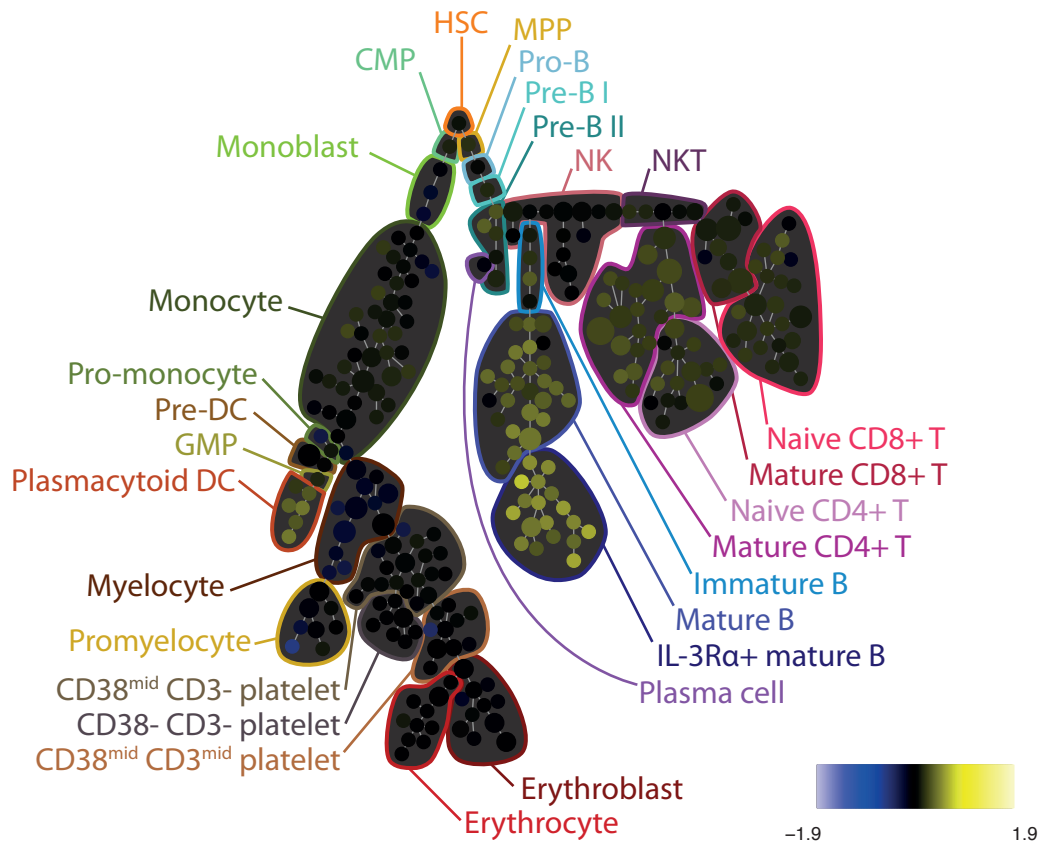

Figure S8A

151-pERK1/2 ---- Flt3L vs Ref Ratio

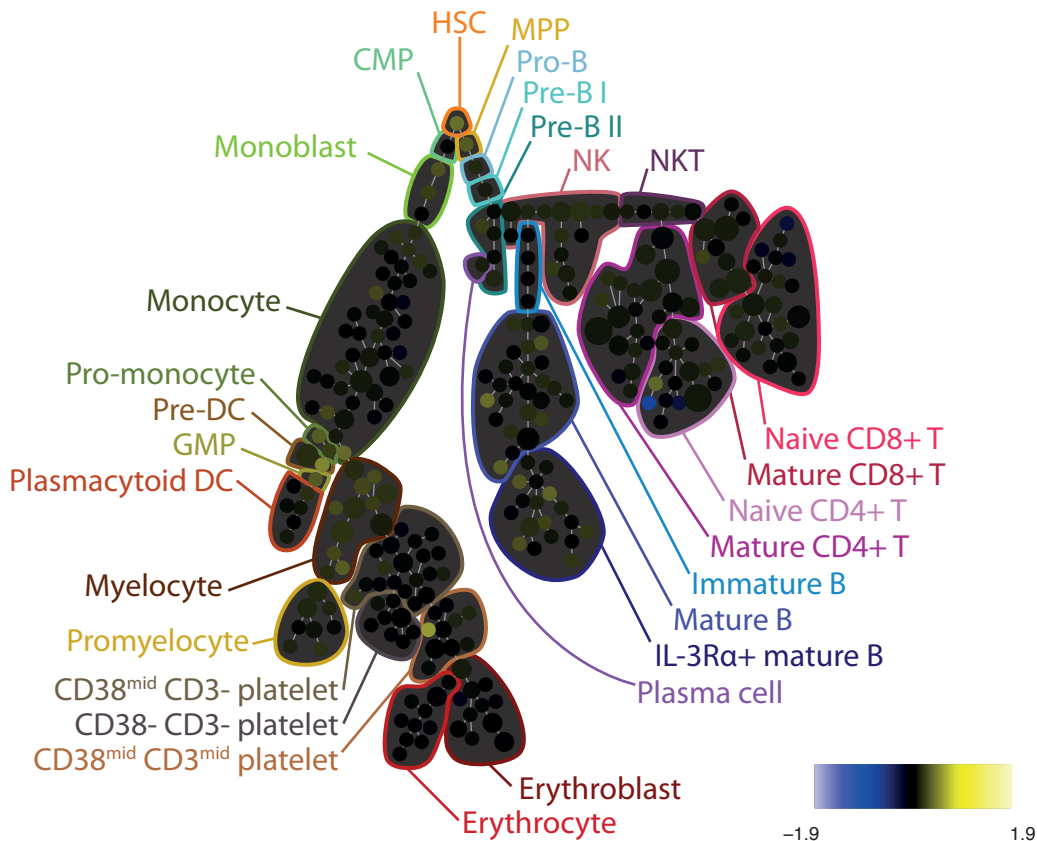

Figure S8A

151-pERK1/2 ---- GCSF vs Ref Ratio

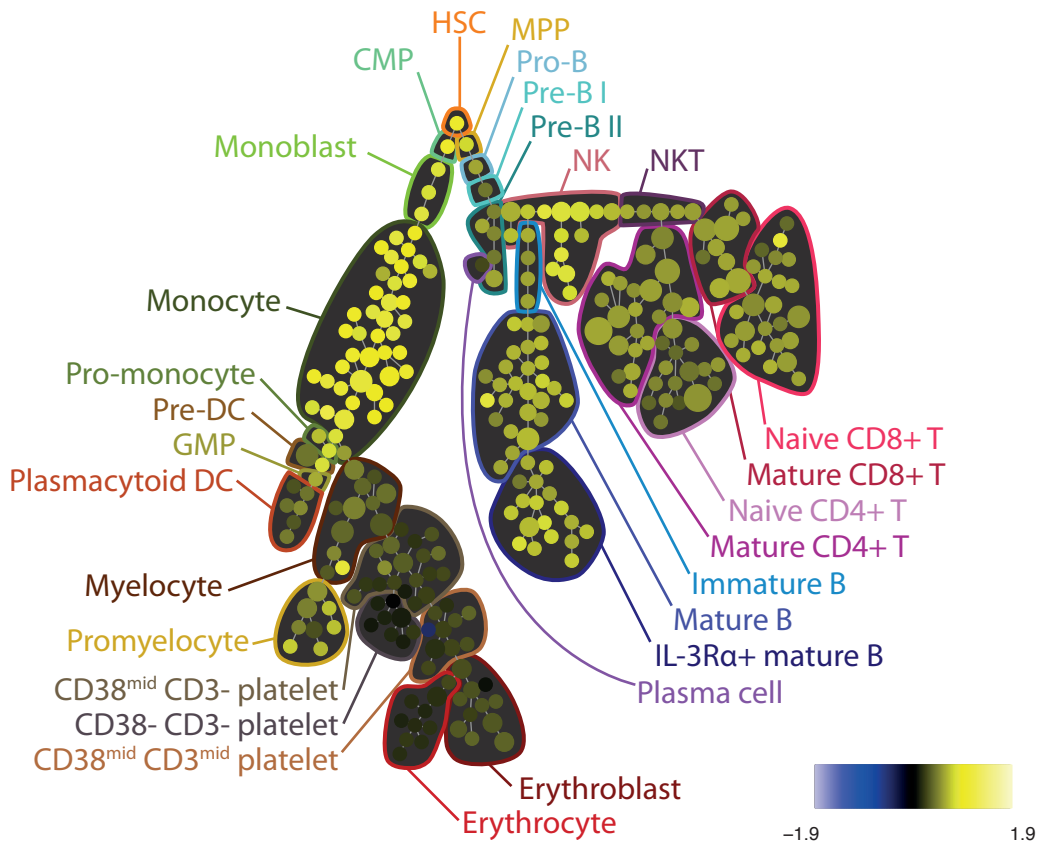



Figure S8A

151-pERK1/2 ---- GMCSF vs Ref Ratio

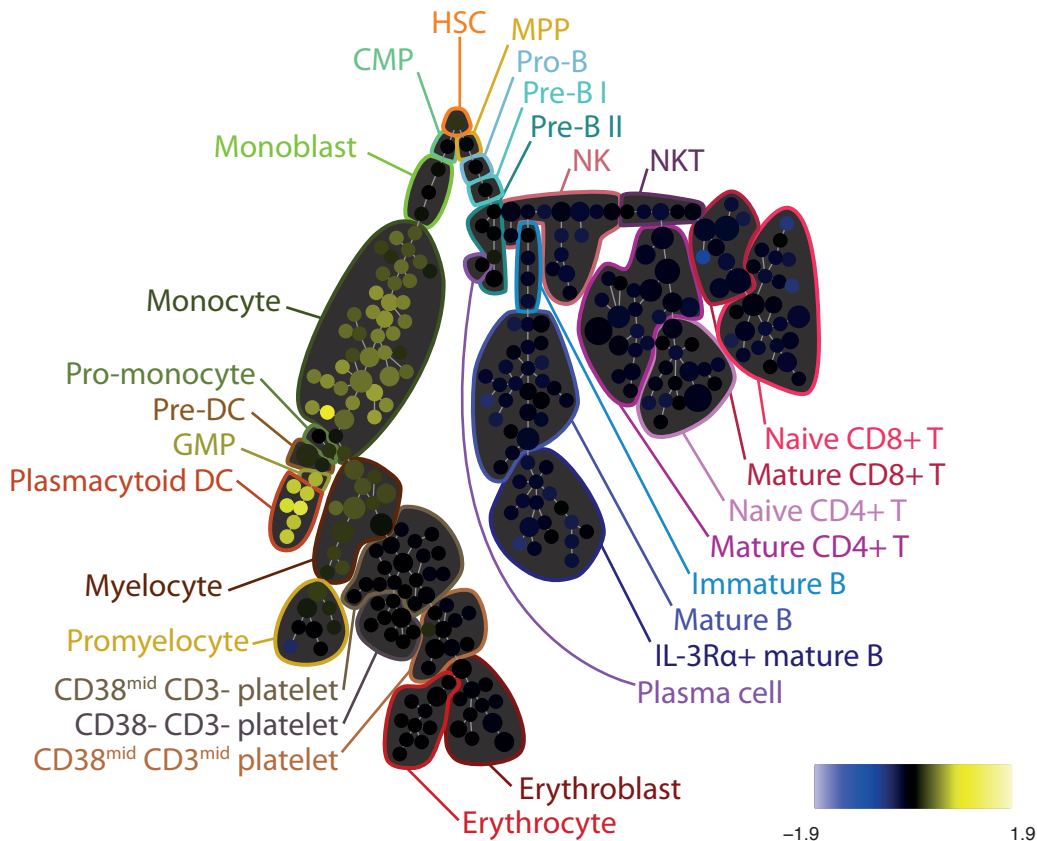

Figure S8A

151-pERK1/2 ---- IFNad vs Ref Ratio

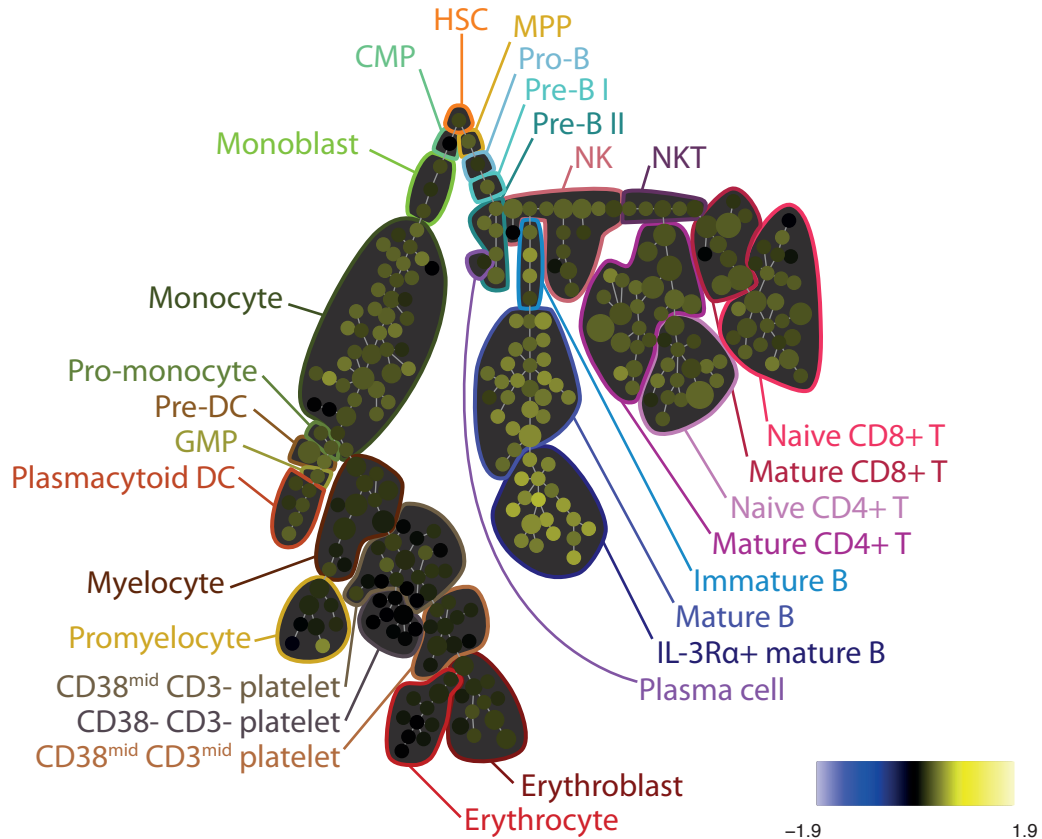

Figure S8A

151-pERK1/2 --- IL3 vs Ref Ratio

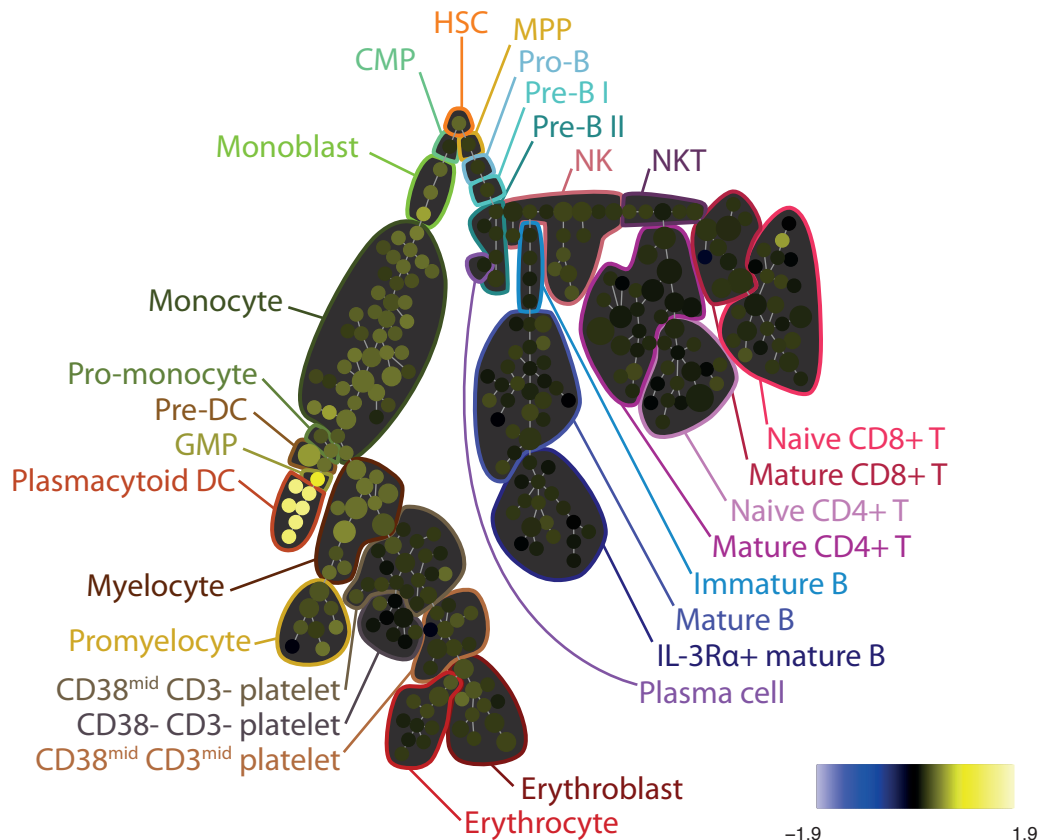

Figure S8A

151-pERK1/2 --- IL7 vs Ref Ratio

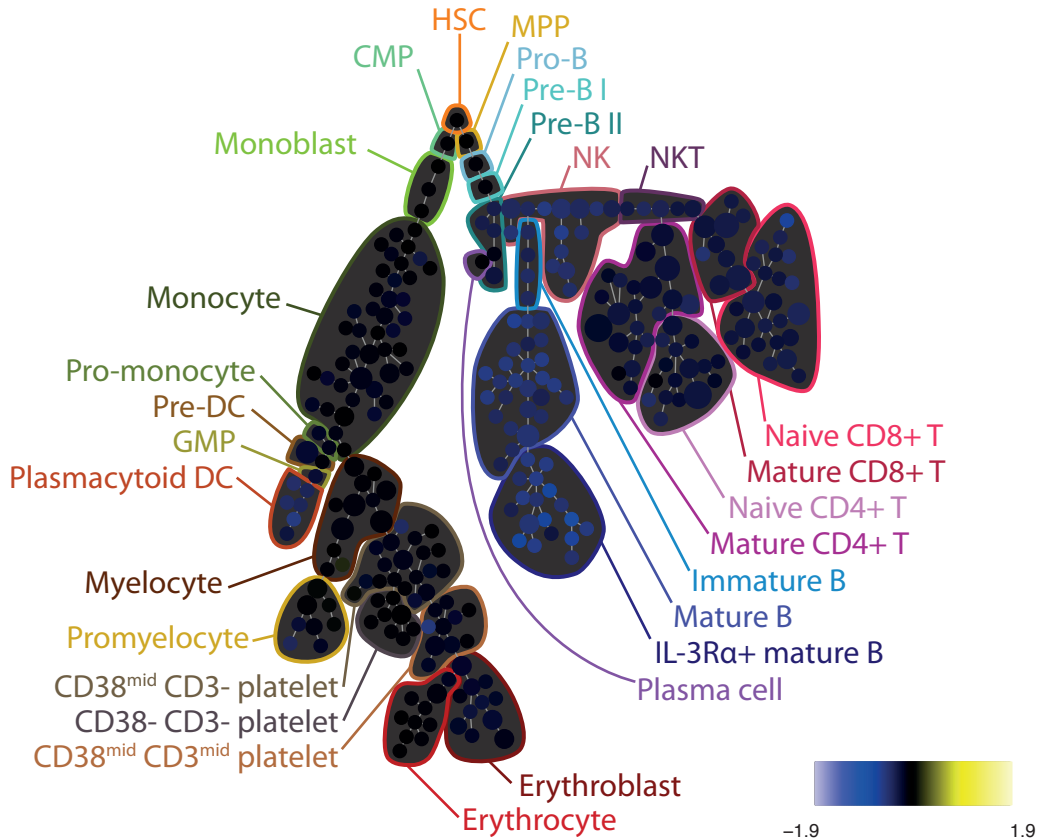

Figure S8A

151-pERK1/2 ---- LPS vs Ref Ratio

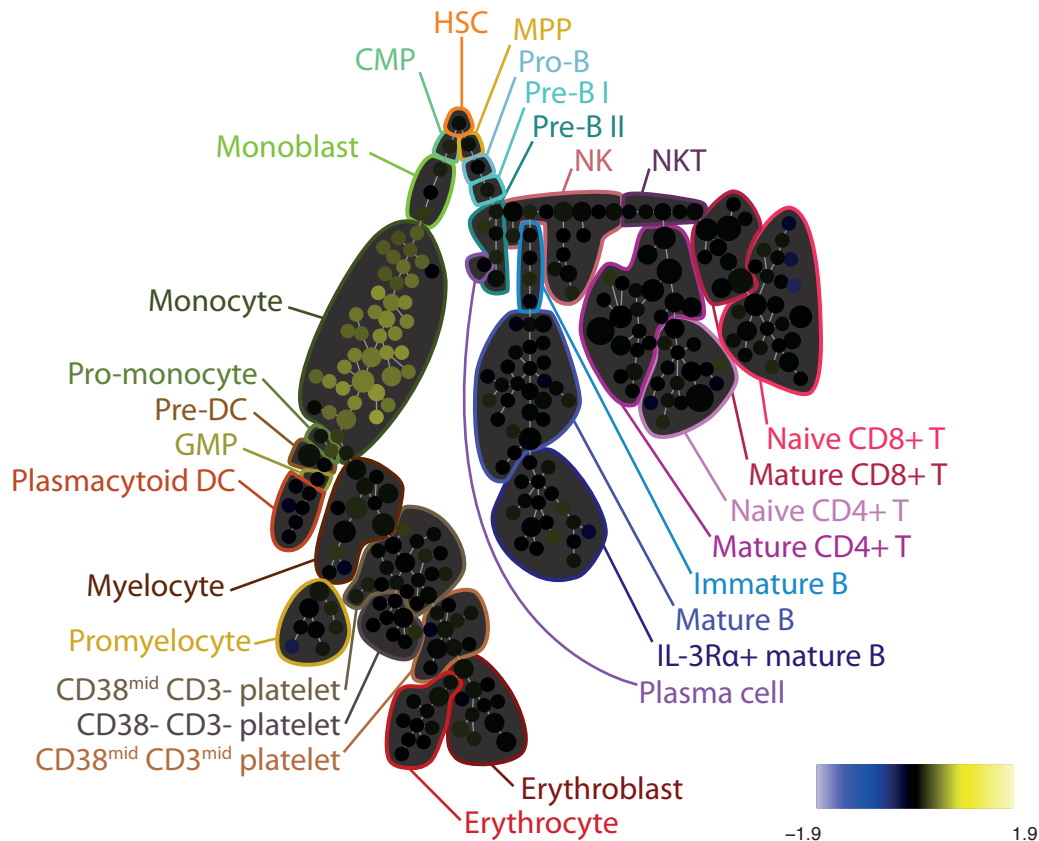

Figure S8A

151-pERK1/2 ---- PMAiono vs Ref Ratio

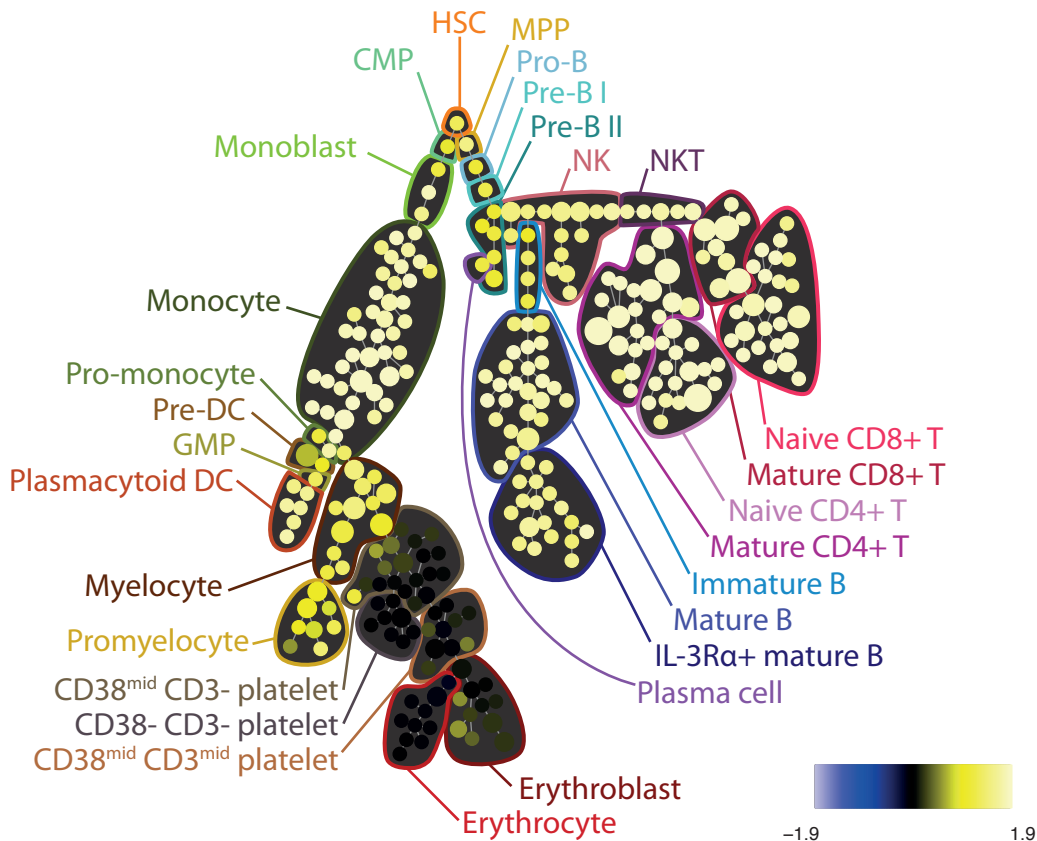

Figure S8A

151-pERK1/2 ---- PVO4 vs Ref Ratio

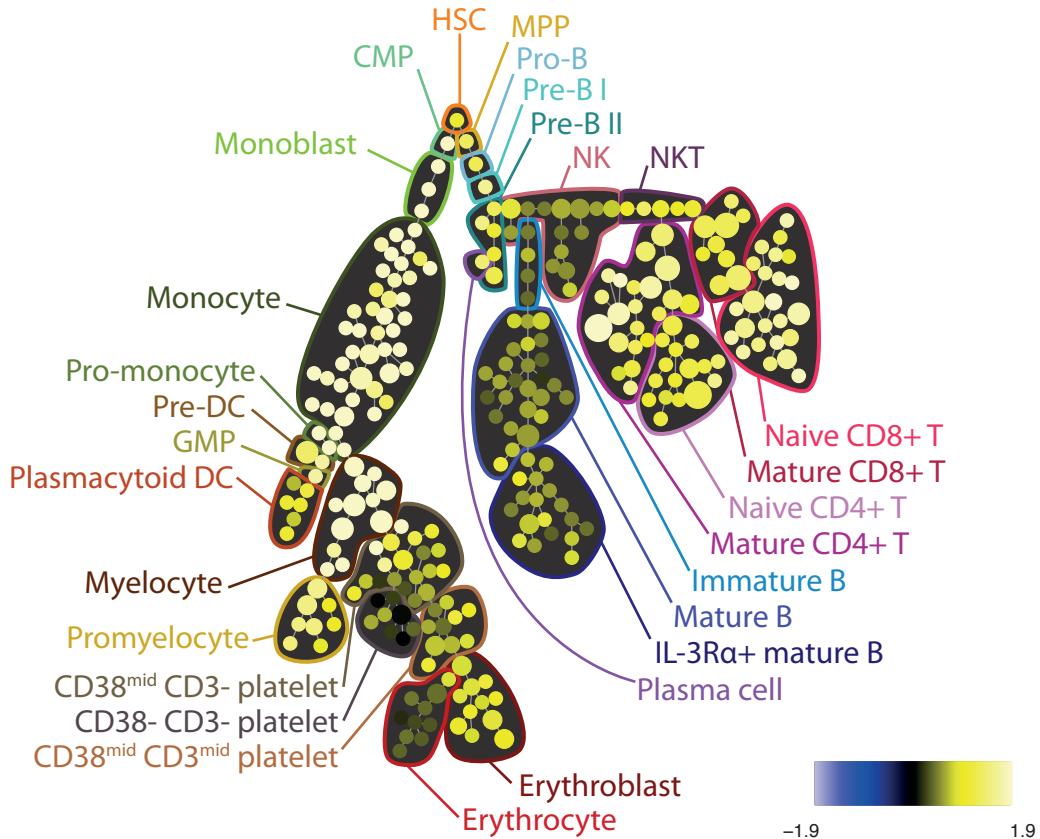

Figure S8A

151-pERK1/2 ---- SCF vs Ref Ratio

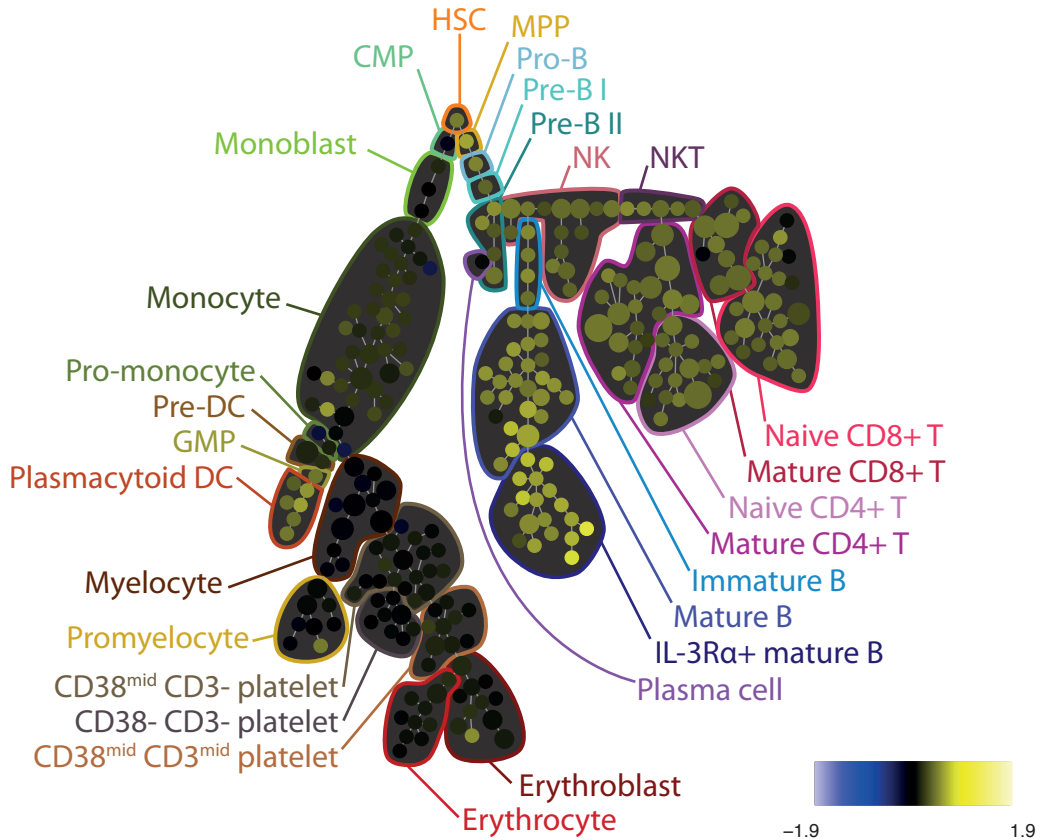



Figure S8A

151-pERK1/2 ---- TNFa vs Ref Ratio

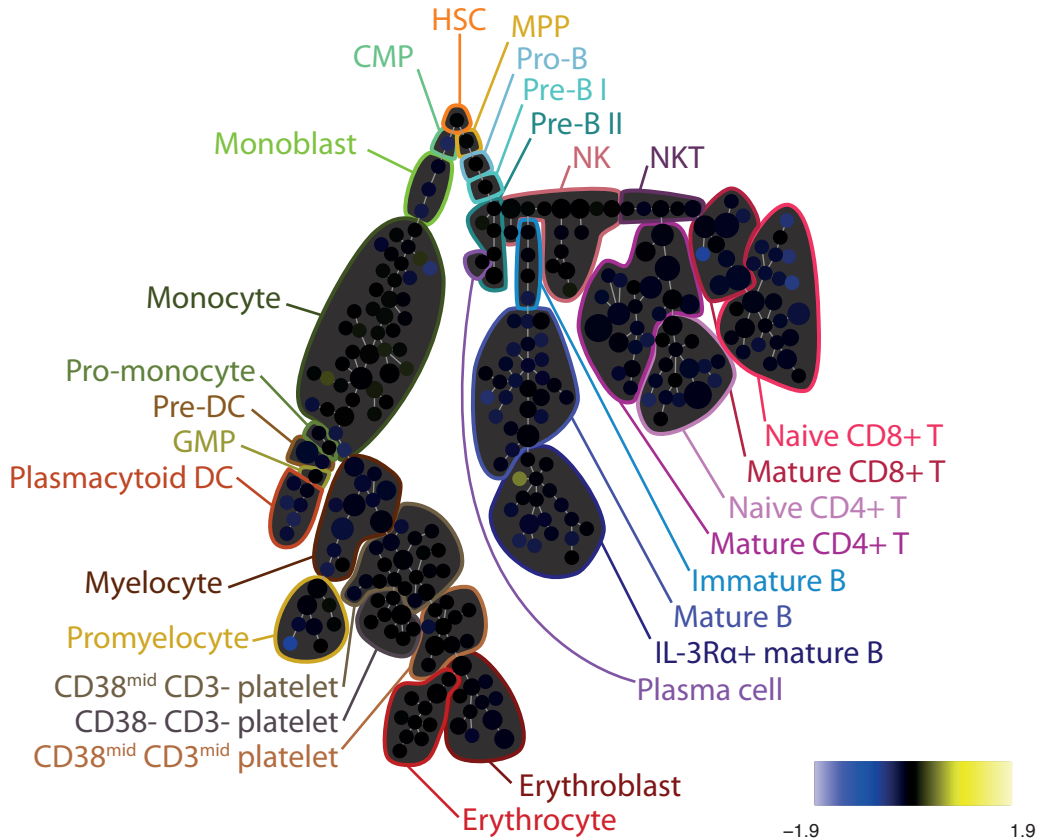

Figure S8A

151-pERK1/2 ---- TPO vs Ref Ratio

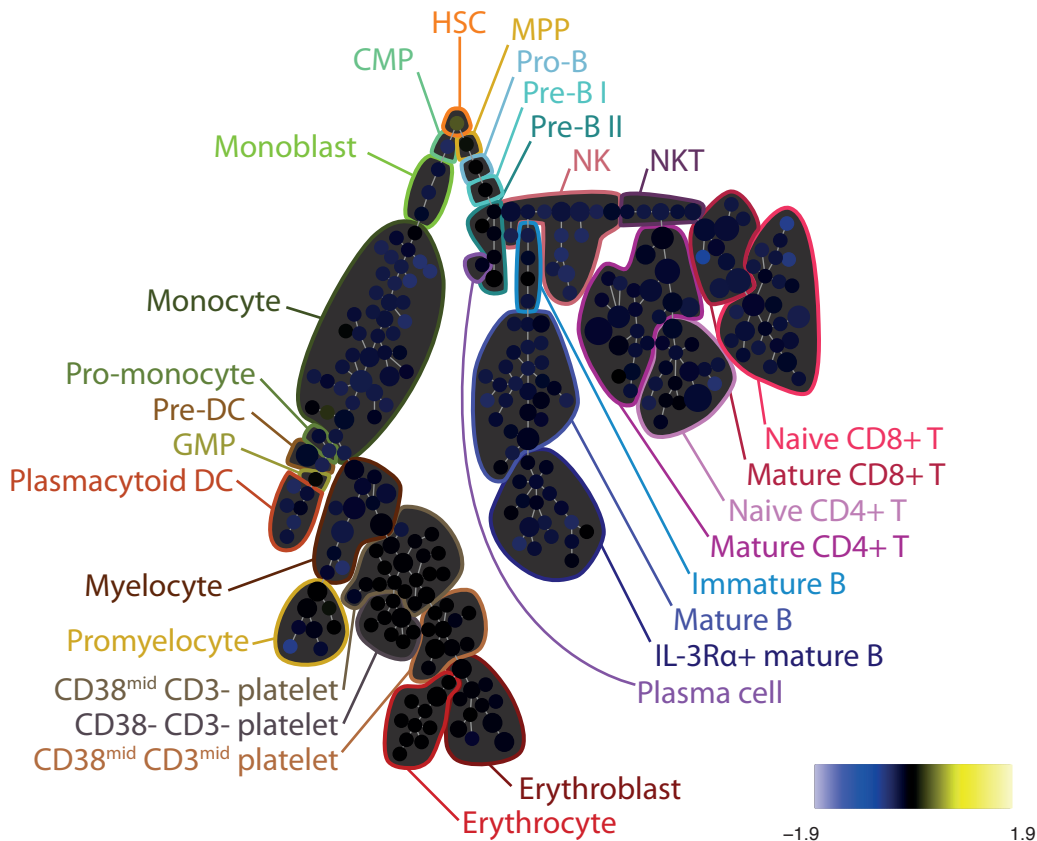

Figure S8A

152-Ki67 ---- BCR vs Ref Ratio

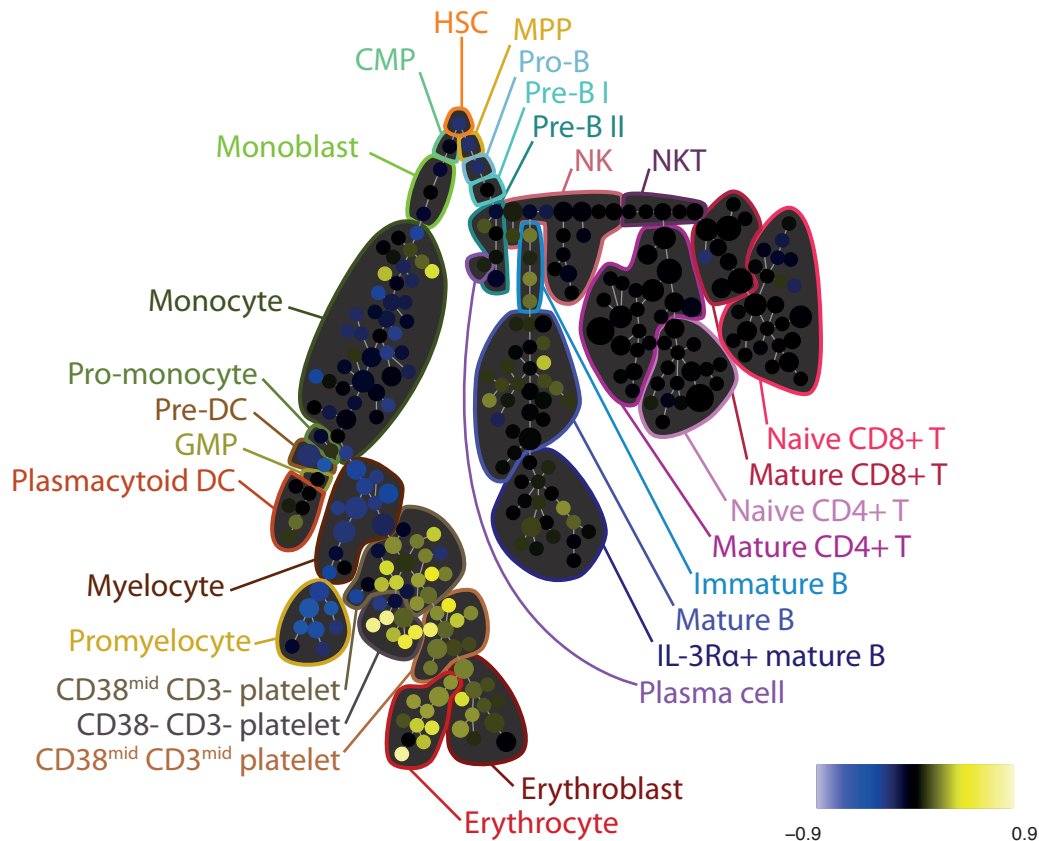

Figure S8A

152-Ki67 ---- DMSO vs Ref Ratio

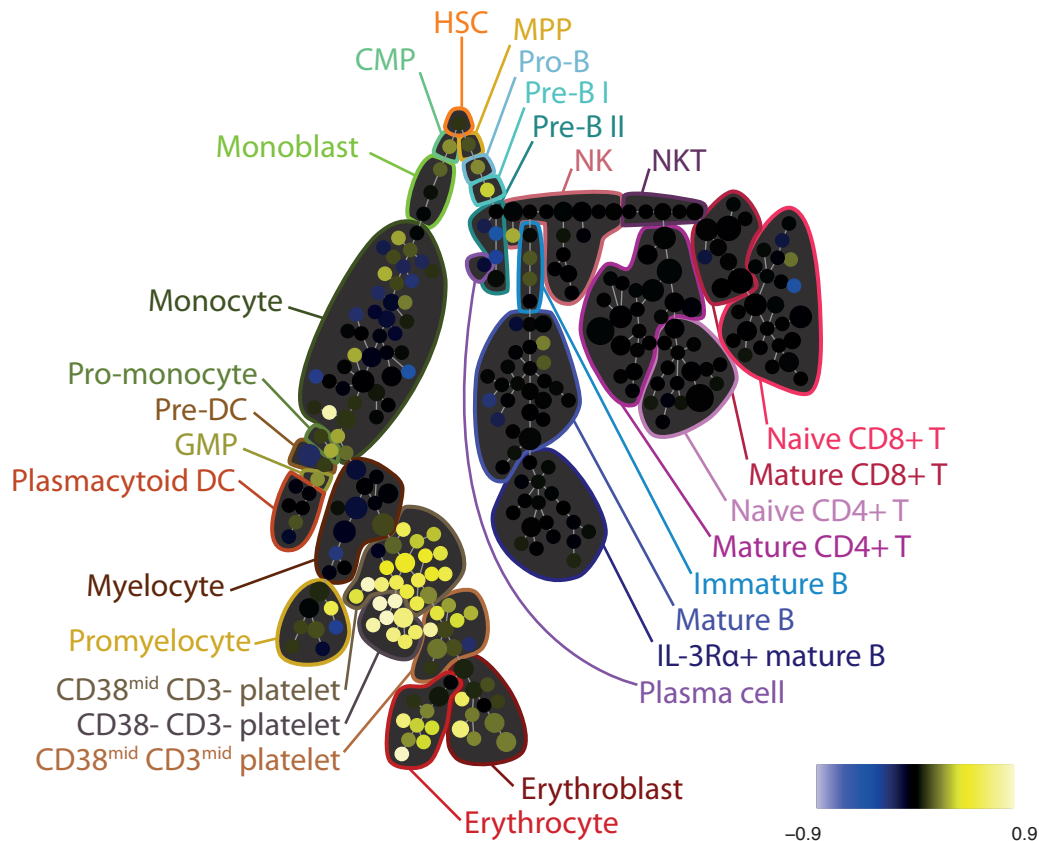

Figure S8A

152-Ki67 ---- Flt3L vs Ref Ratio

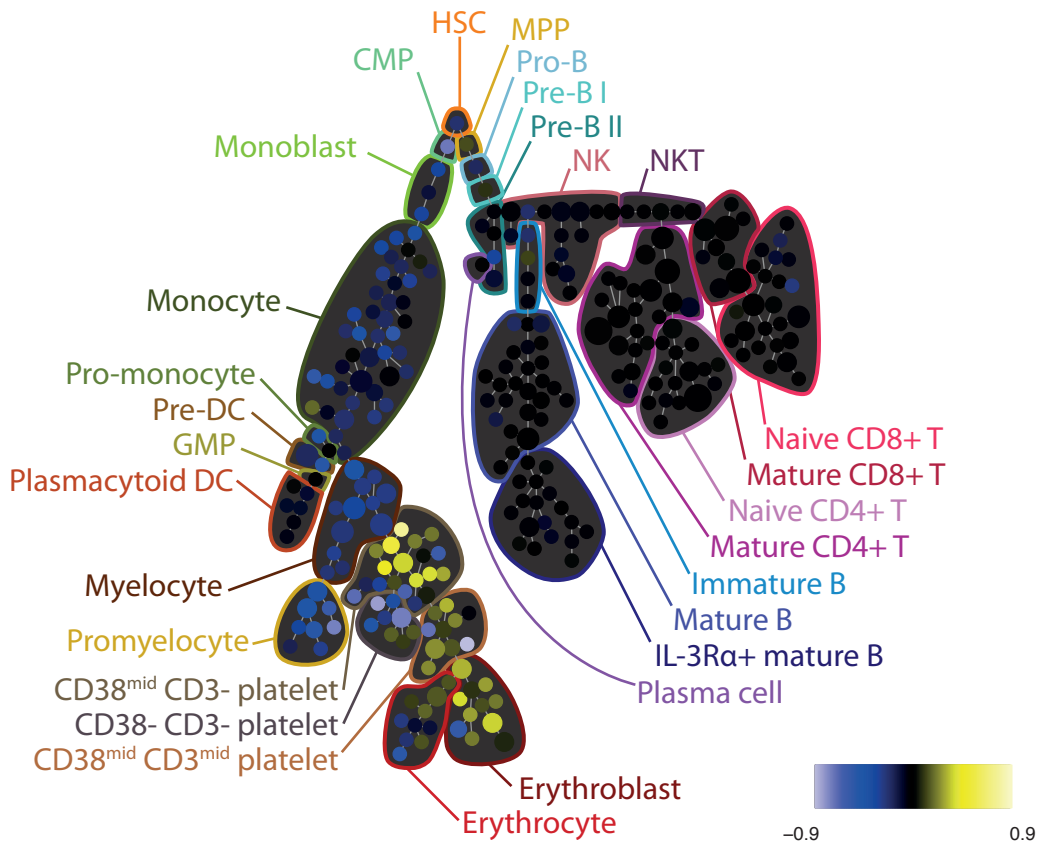

Figure S8A

152-Ki67 ---- GCSF vs Ref Ratio

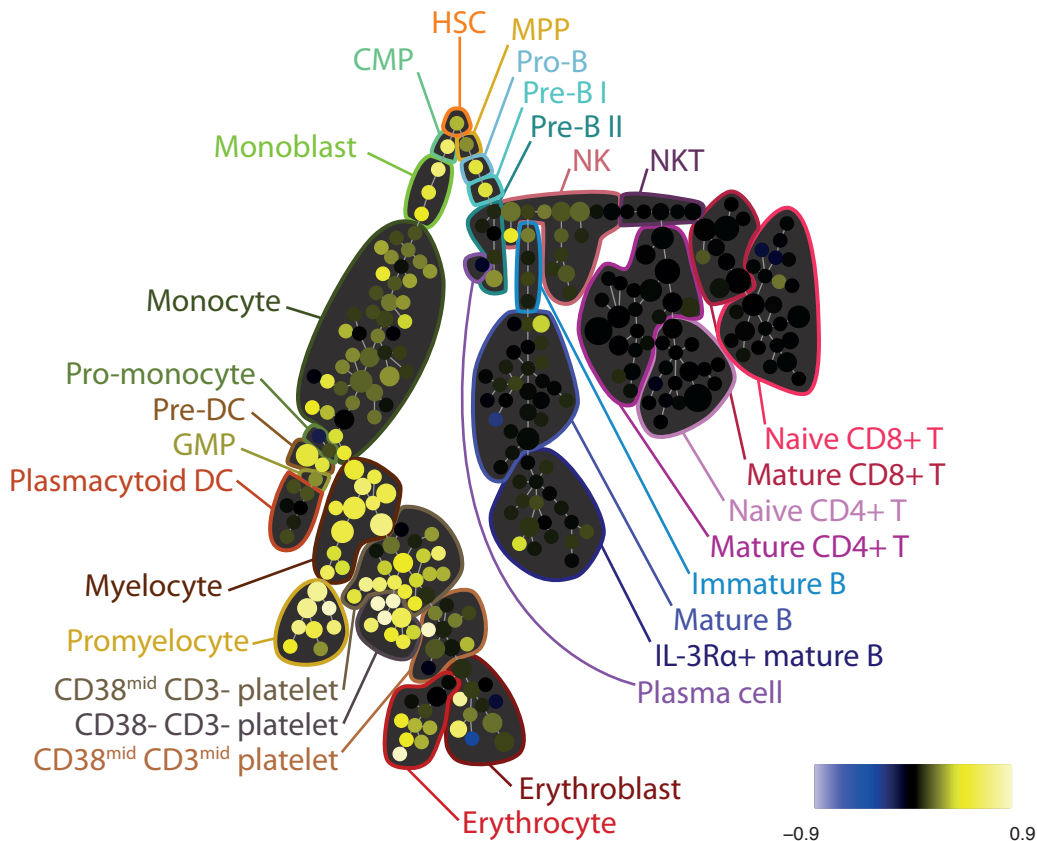

Figure S8A

152-Ki67 ---- GMCSF vs Ref Ratio

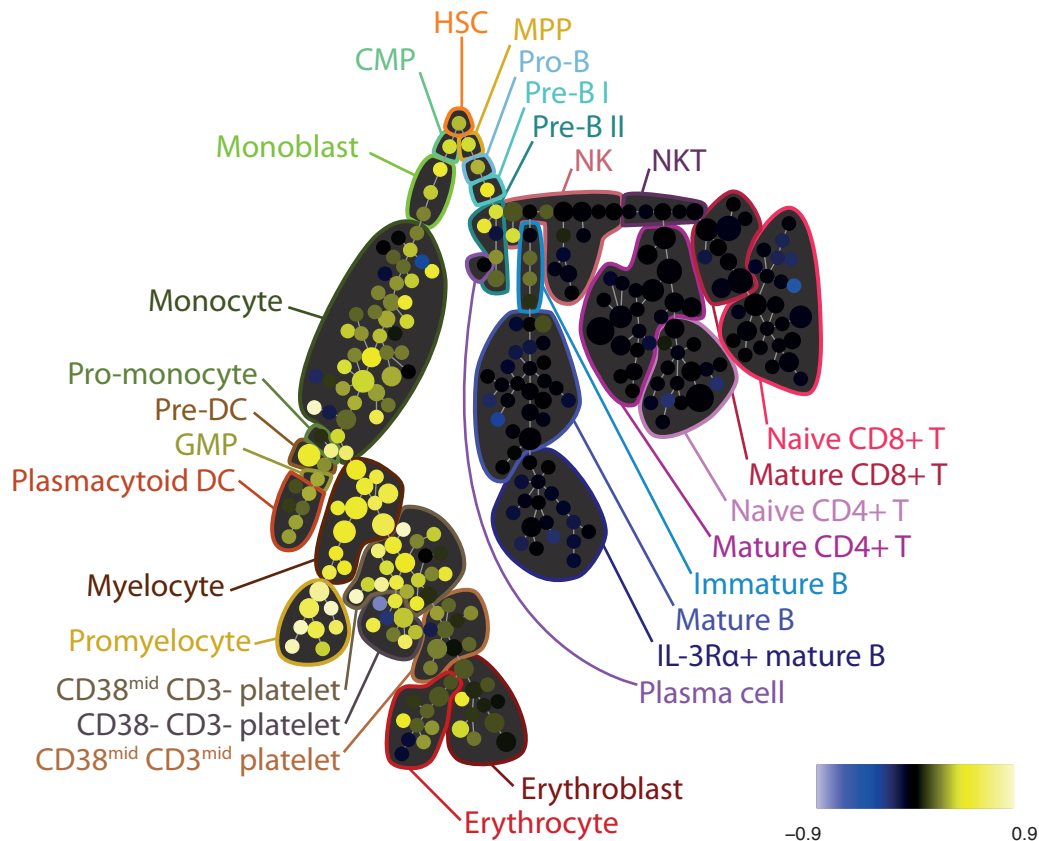

Figure S8A

152-Ki67 ---- IFNad vs Ref Ratio

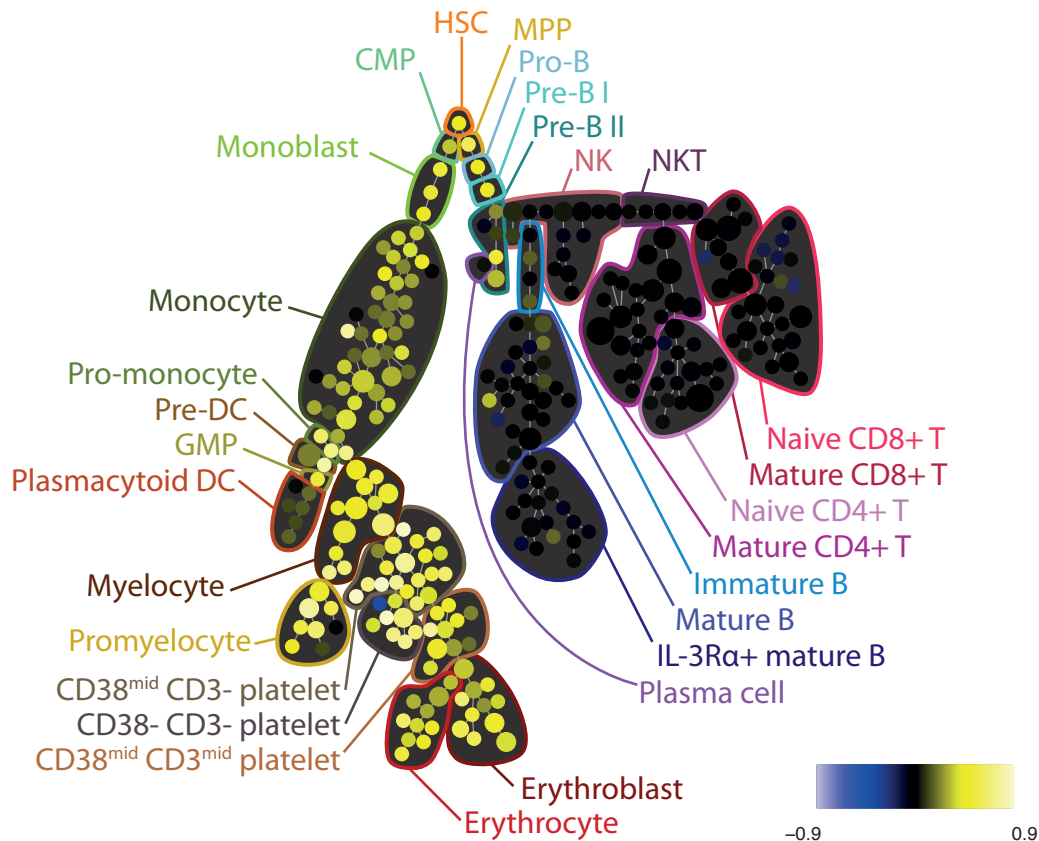



Figure S8A

152-Ki67 ---- IL3 vs Ref Ratio

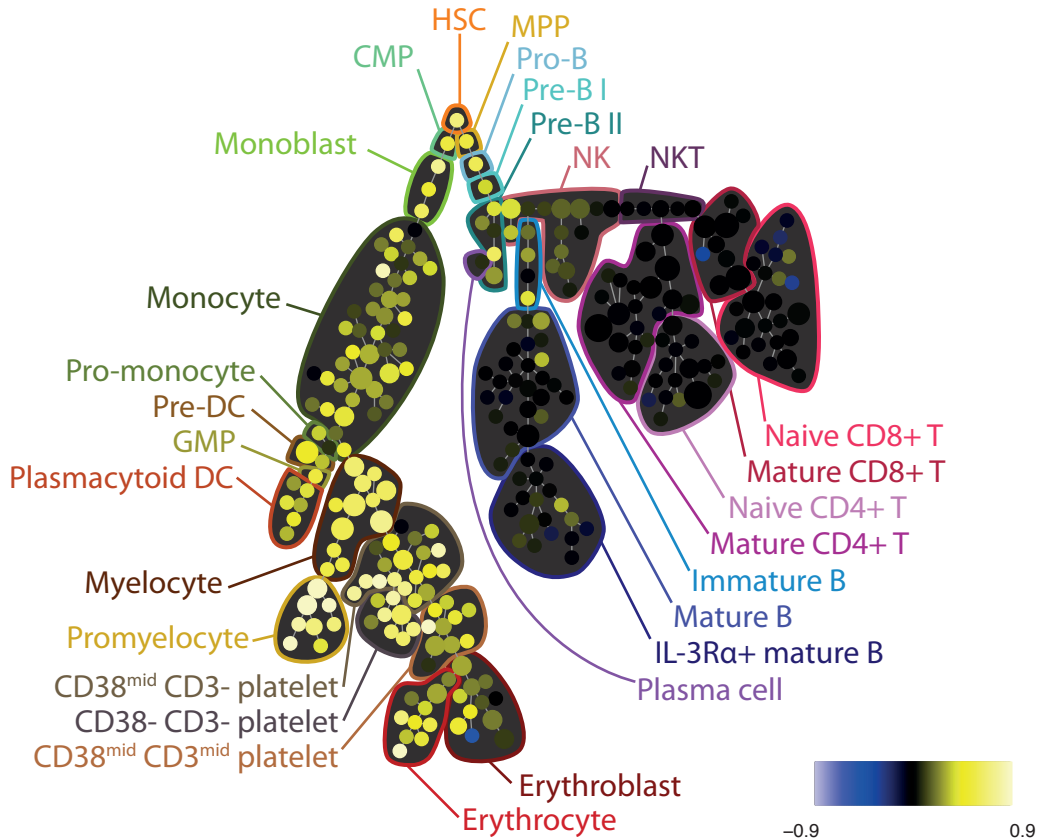

Figure S8A

152-Ki67 ---- IL7 vs Ref Ratio

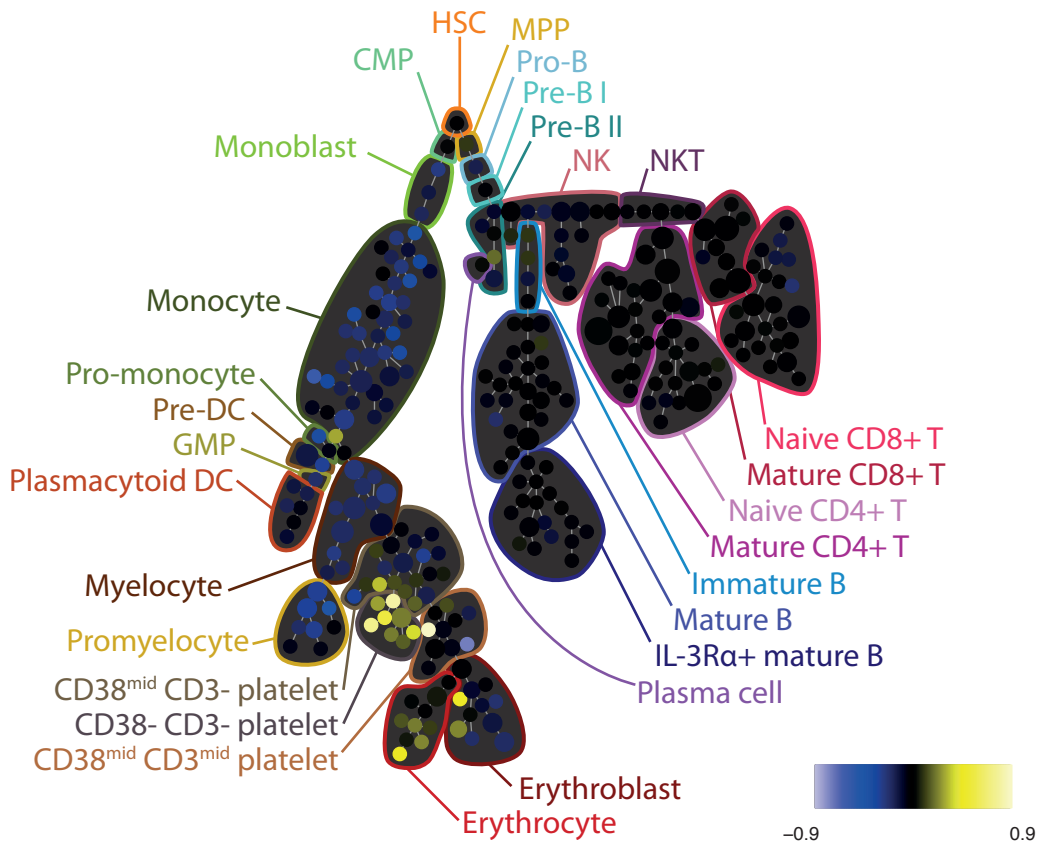

Figure S8A

152-Ki67 ---- LPS vs Ref Ratio

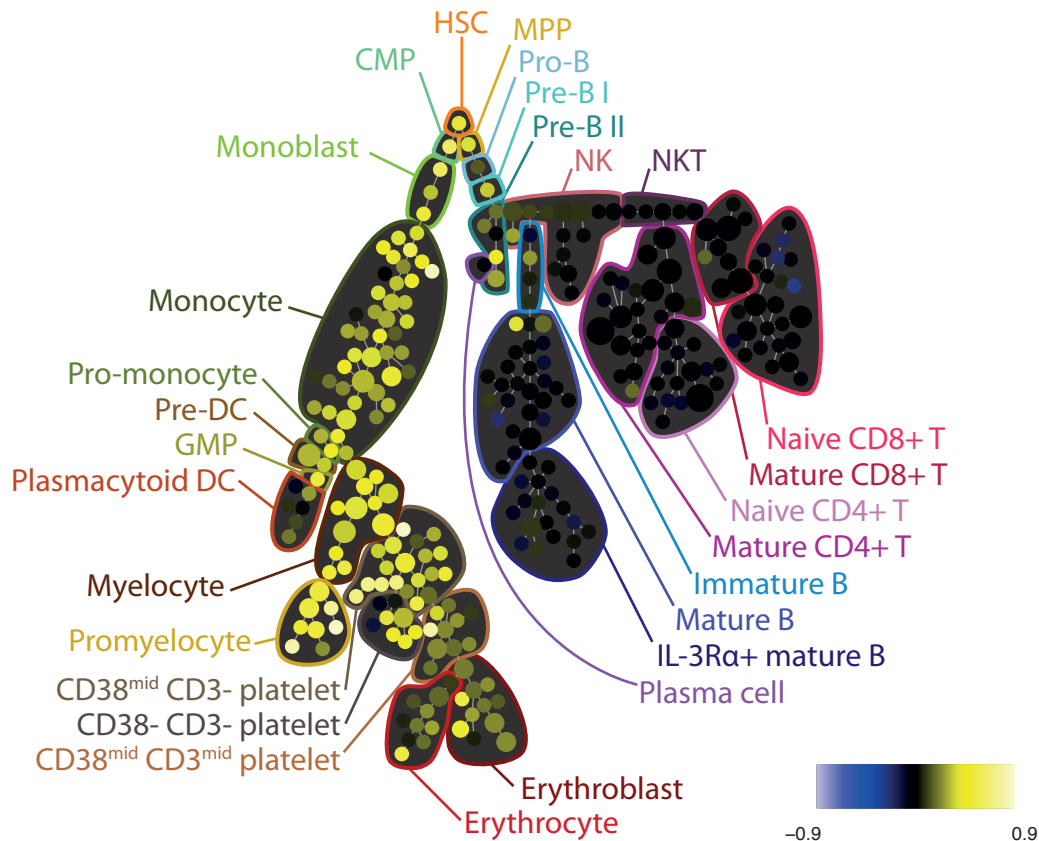

Figure S8A

152-Ki67 ---- PMAiono vs Ref Ratio

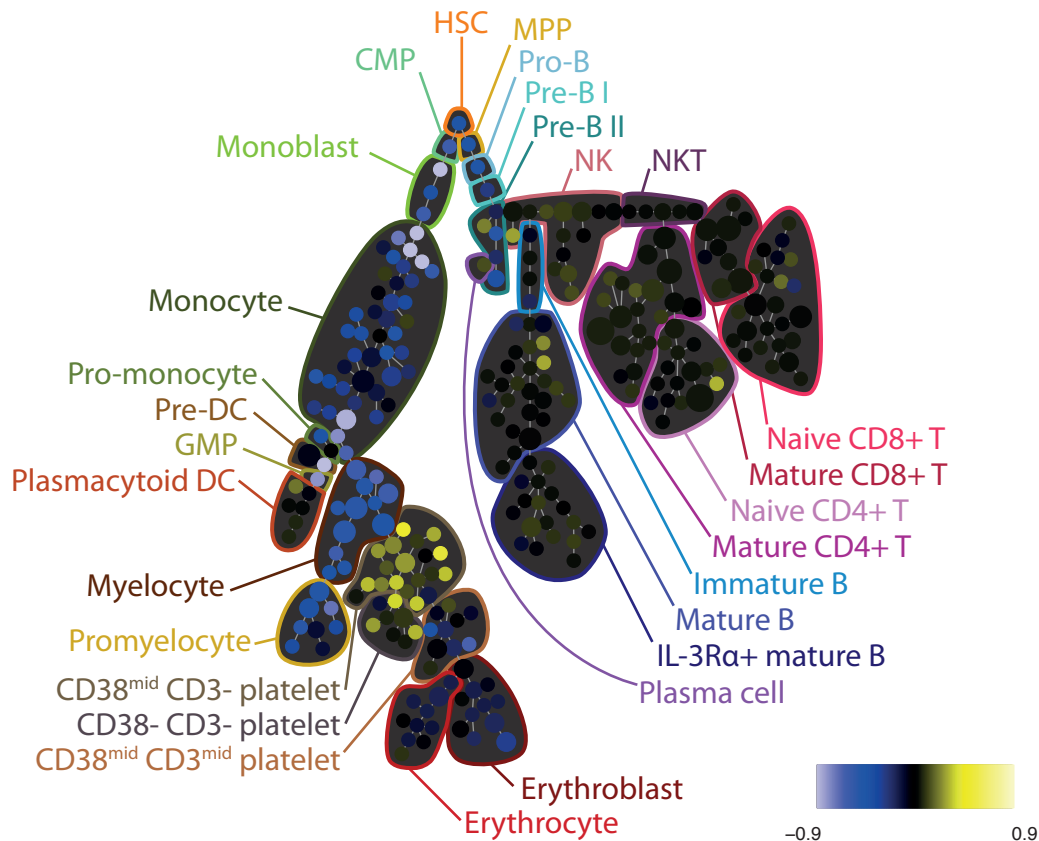

Figure S8A

152-Ki67 ---- PVO4 vs Ref Ratio

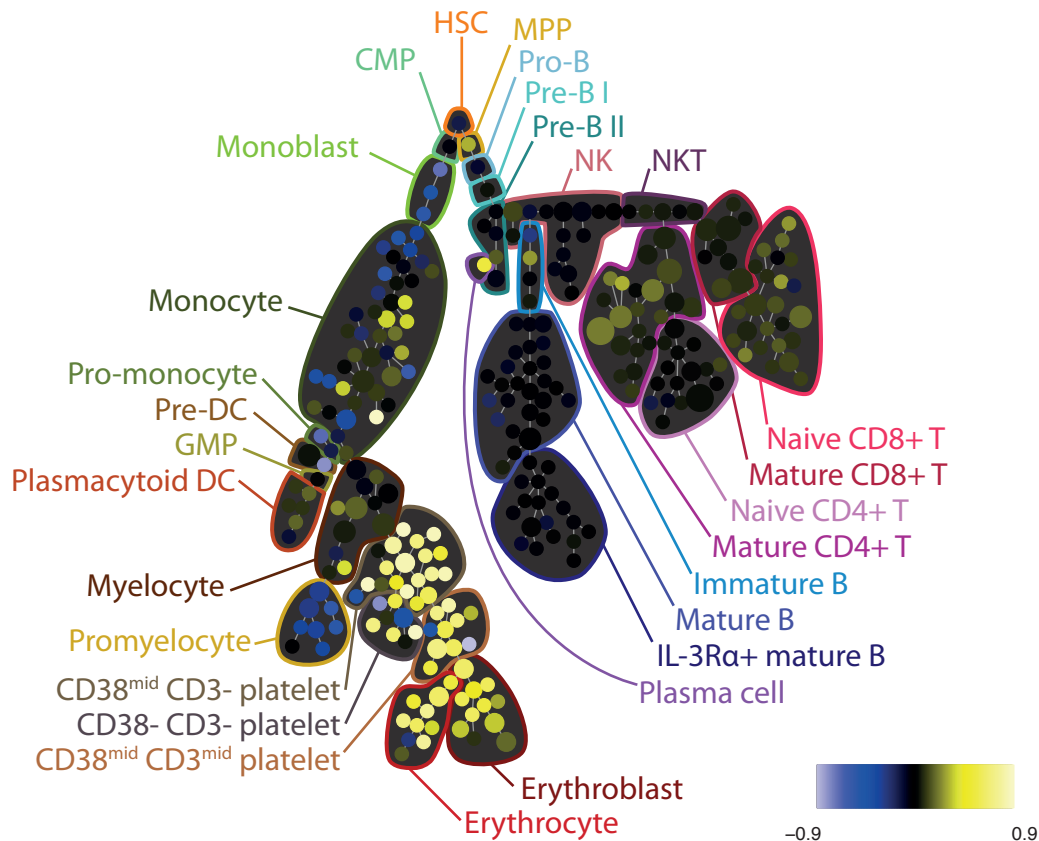

Figure S8A

152-Ki67 ---- SCF vs Ref Ratio

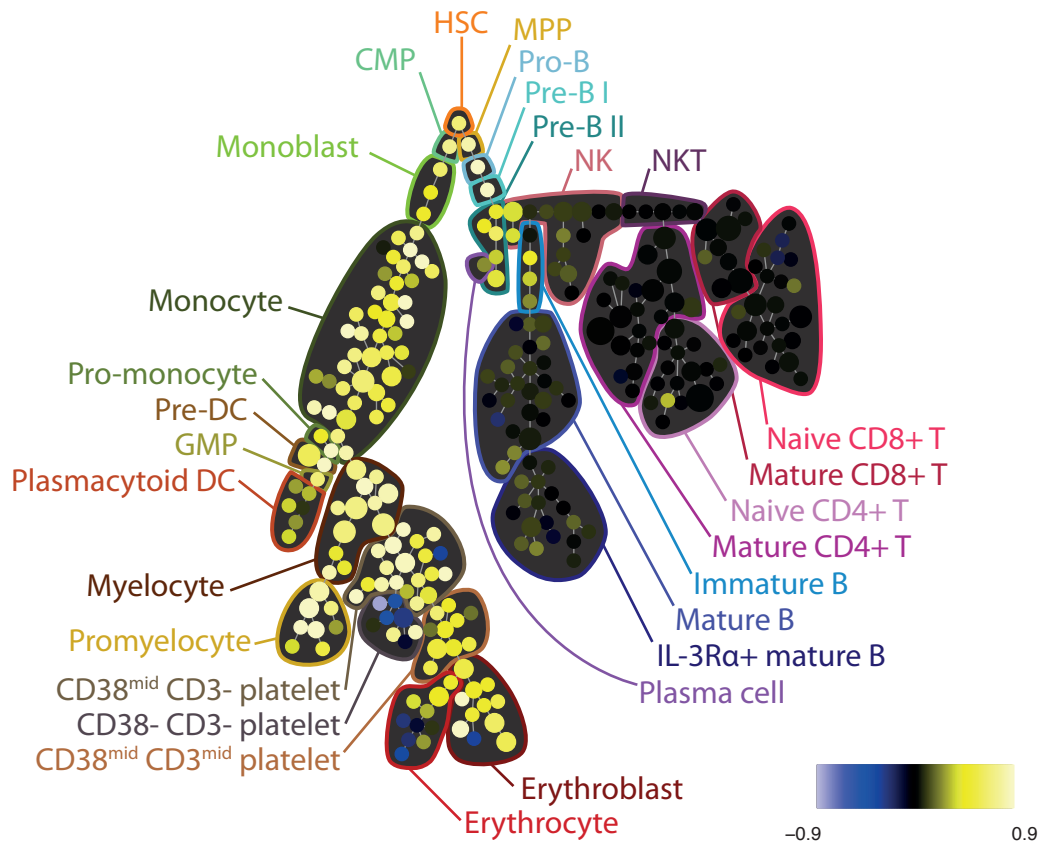

Figure S8A

152-Ki67 ---- TNFa vs Ref Ratio

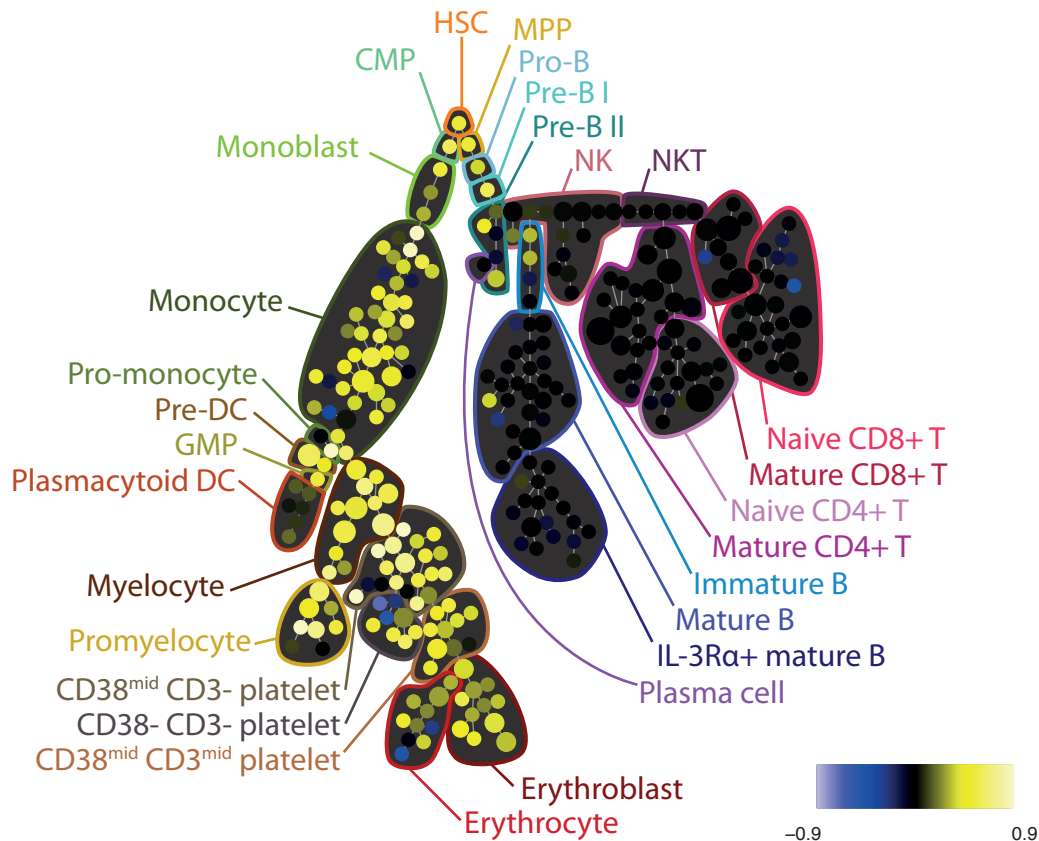

Figure S8A

152-Ki67 ---- TPO vs Ref Ratio

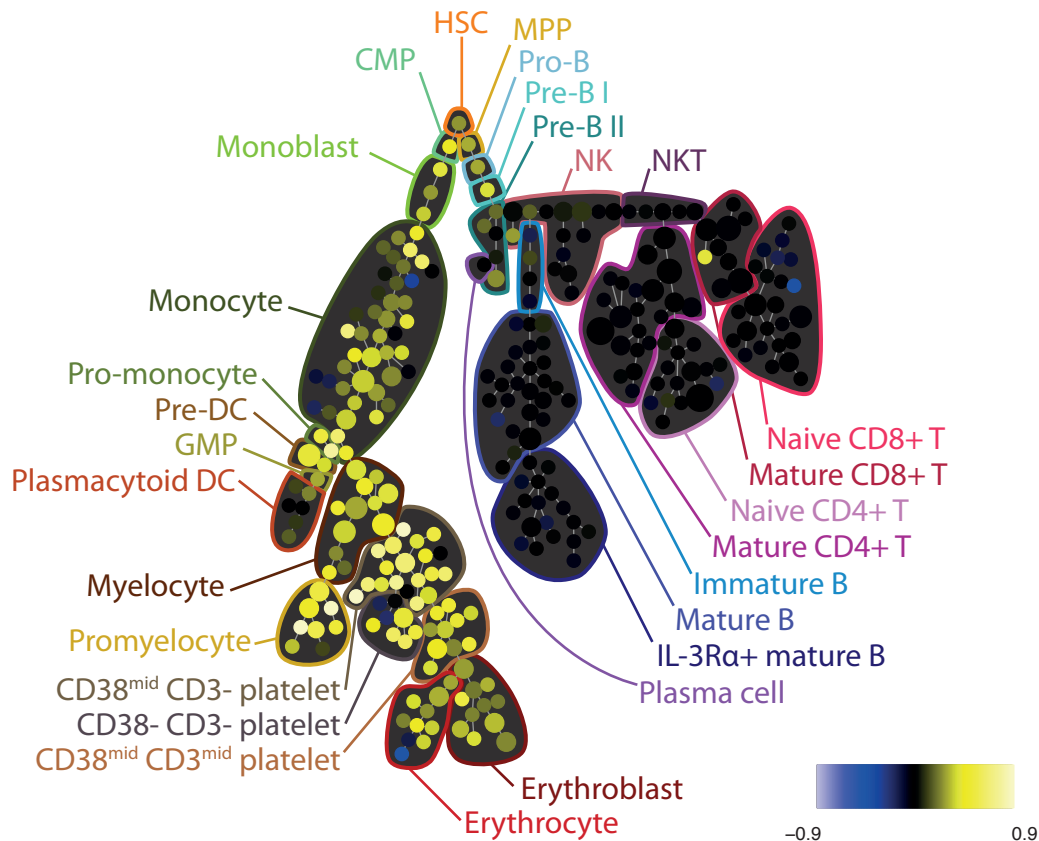



Figure S8A

153-pMAPKAPK2 ---- BCR vs Ref Ratio

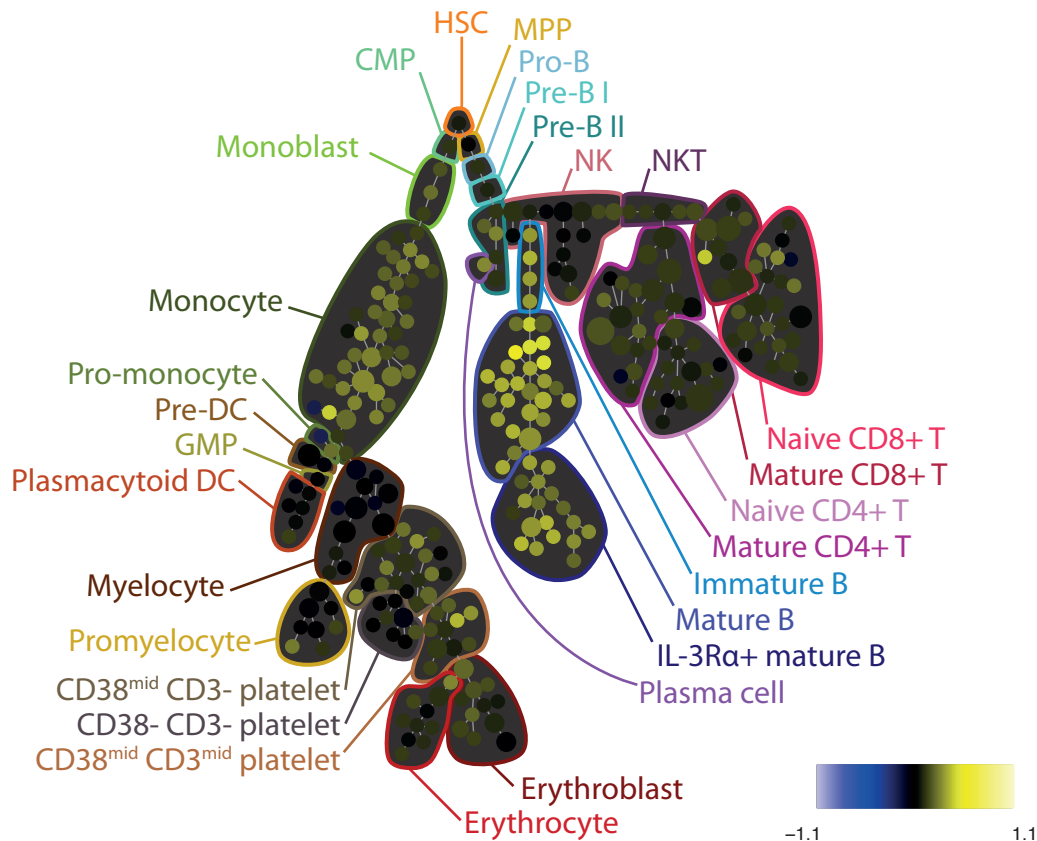

Figure S8A

153-pMAPKAPK2 ---- DMSO vs Ref Ratio

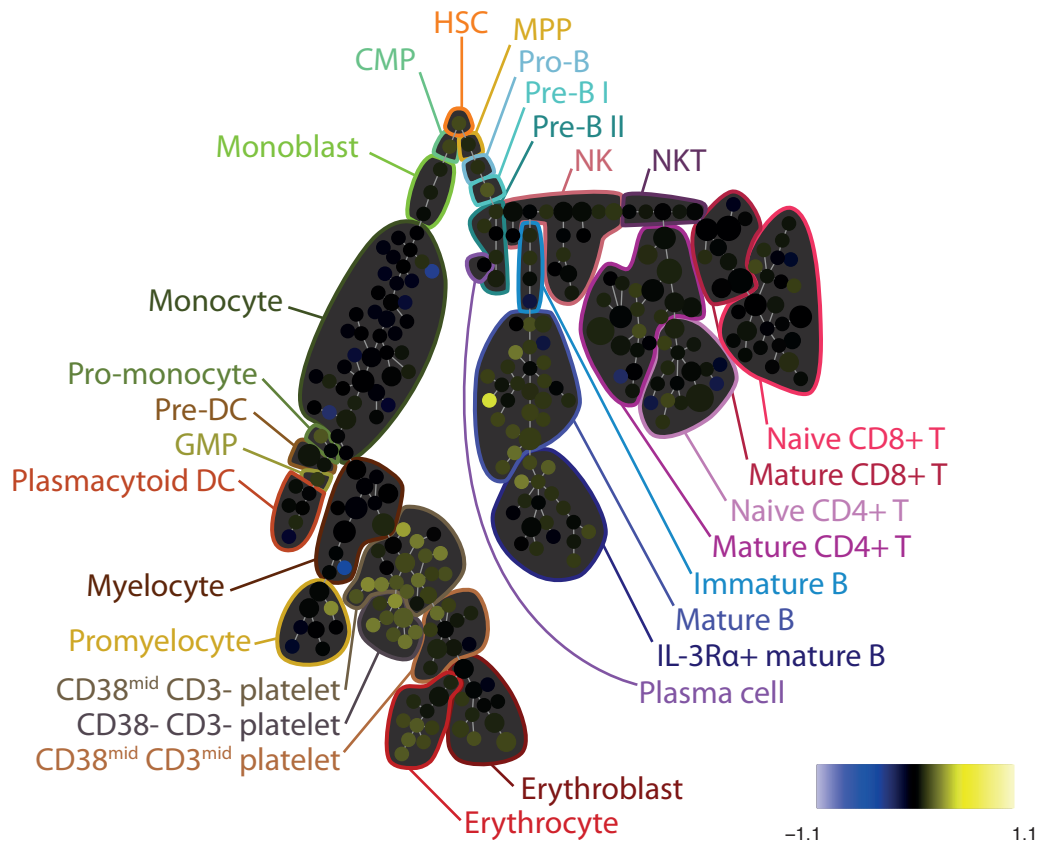

Figure S8A

153-pMAPKAPK2 ---- Flt3L vs Ref Ratio

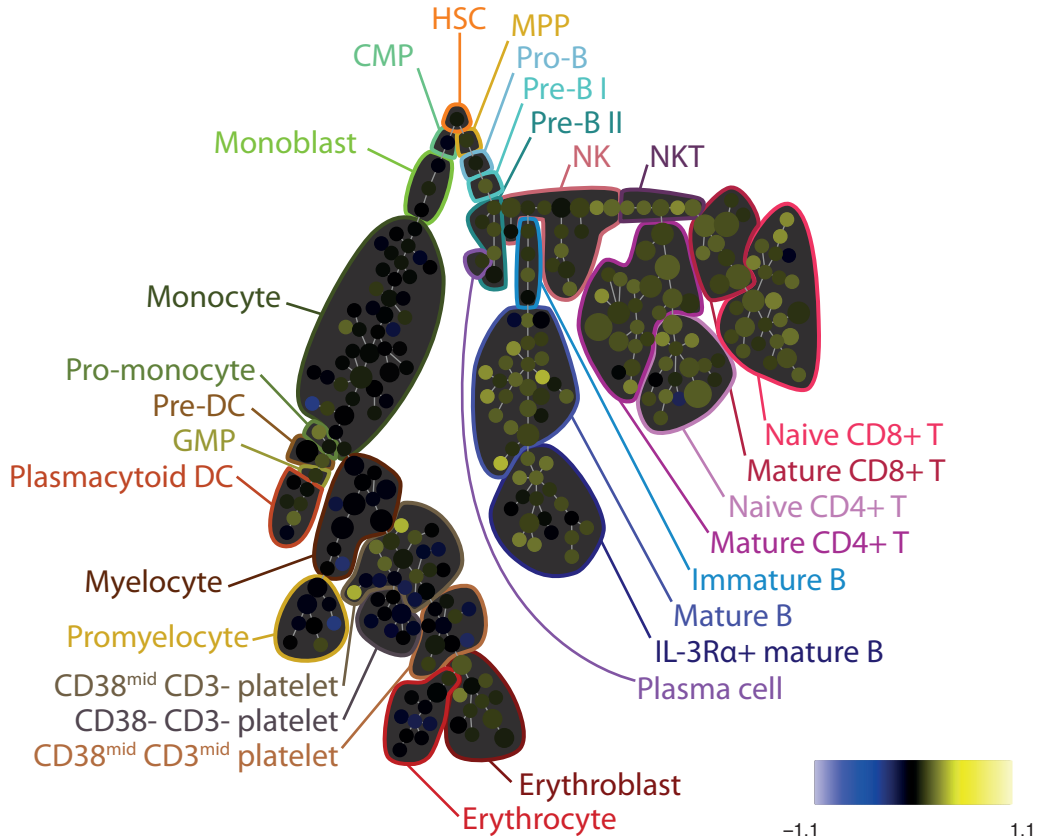

Figure S8A

153-pMAPKAPK2 — GCSF vs Ref Ratio

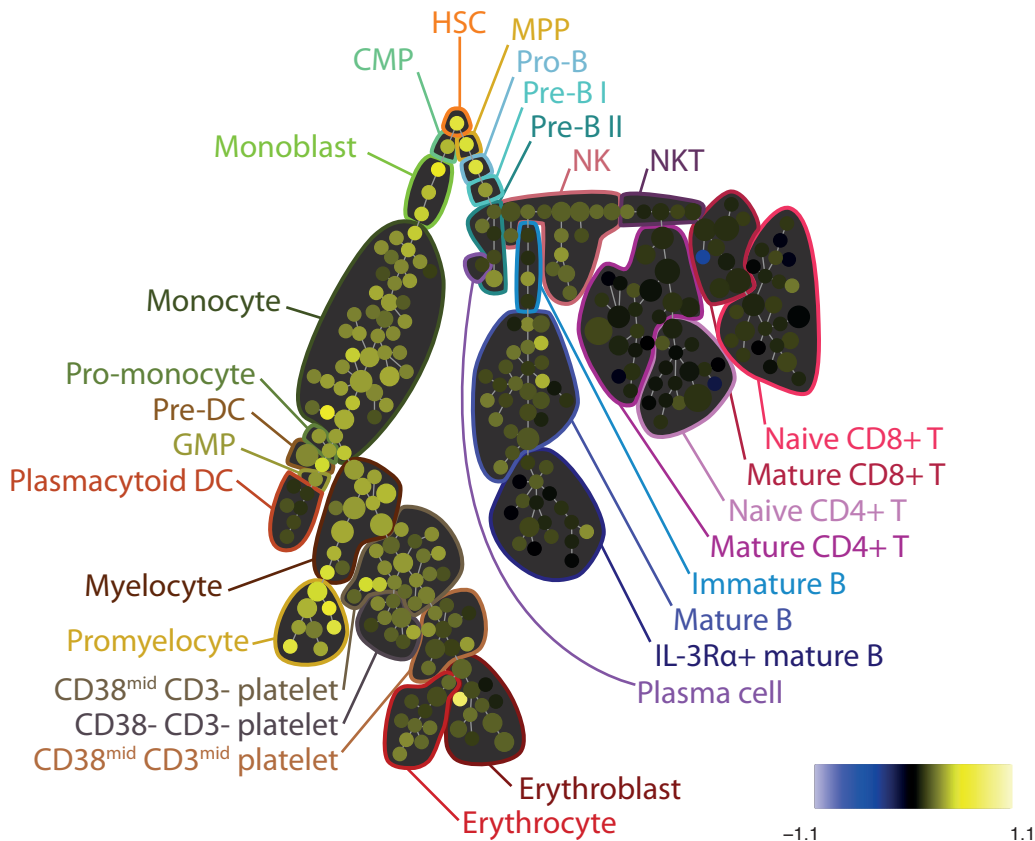

Figure S8A

153-pMAPKAPK2 --- GMCSF vs Ref Ratio

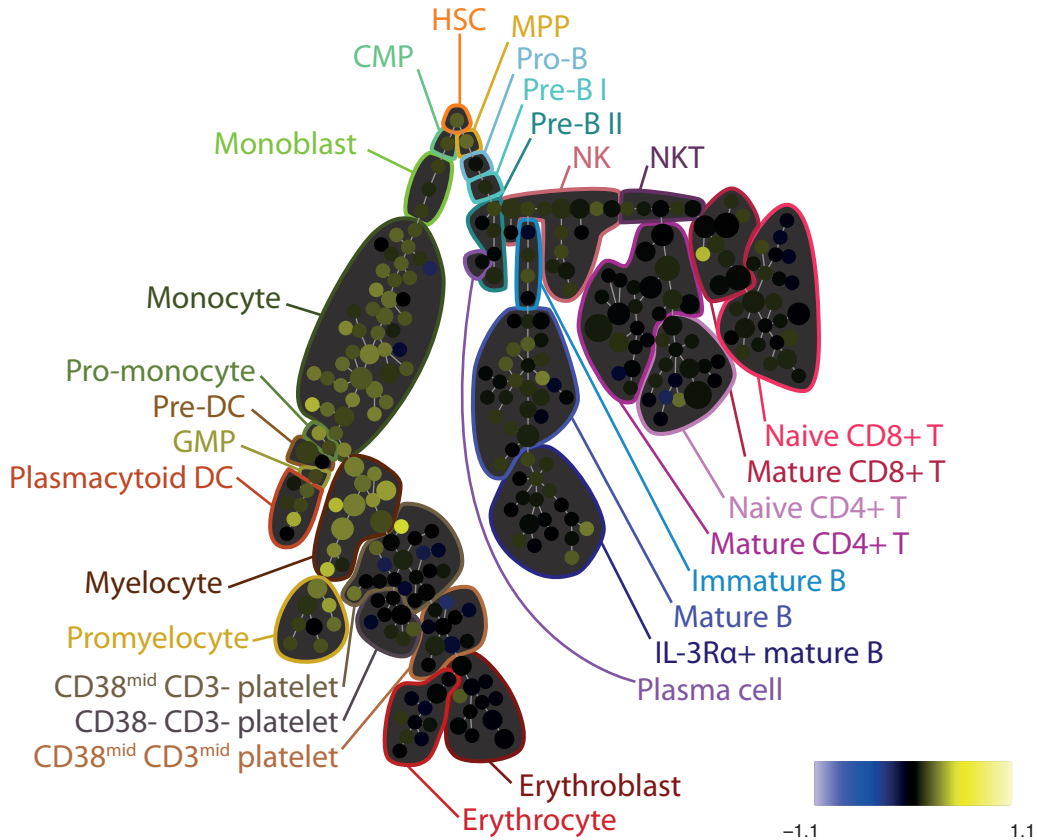

Figure S8A

153-pMAPKAPK2 ---- IFNad vs Ref Ratio

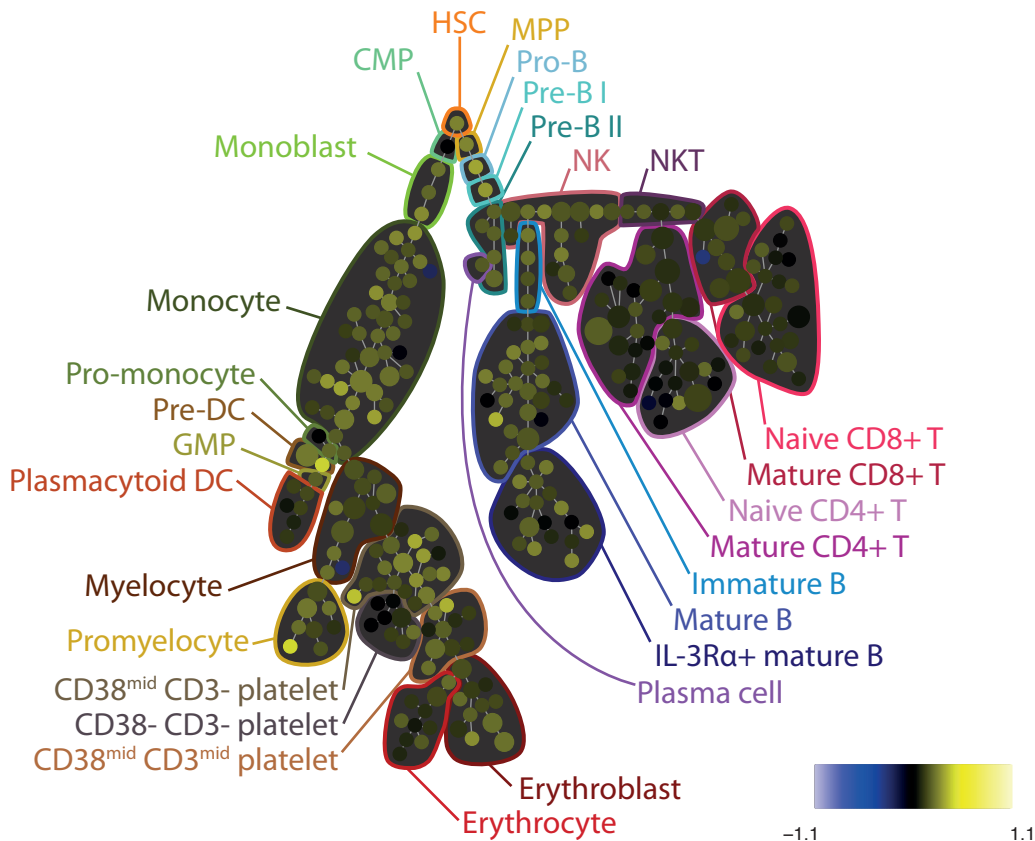

Figure S8A

153-pMAPKAPK2 ---- IL3 vs Ref Ratio

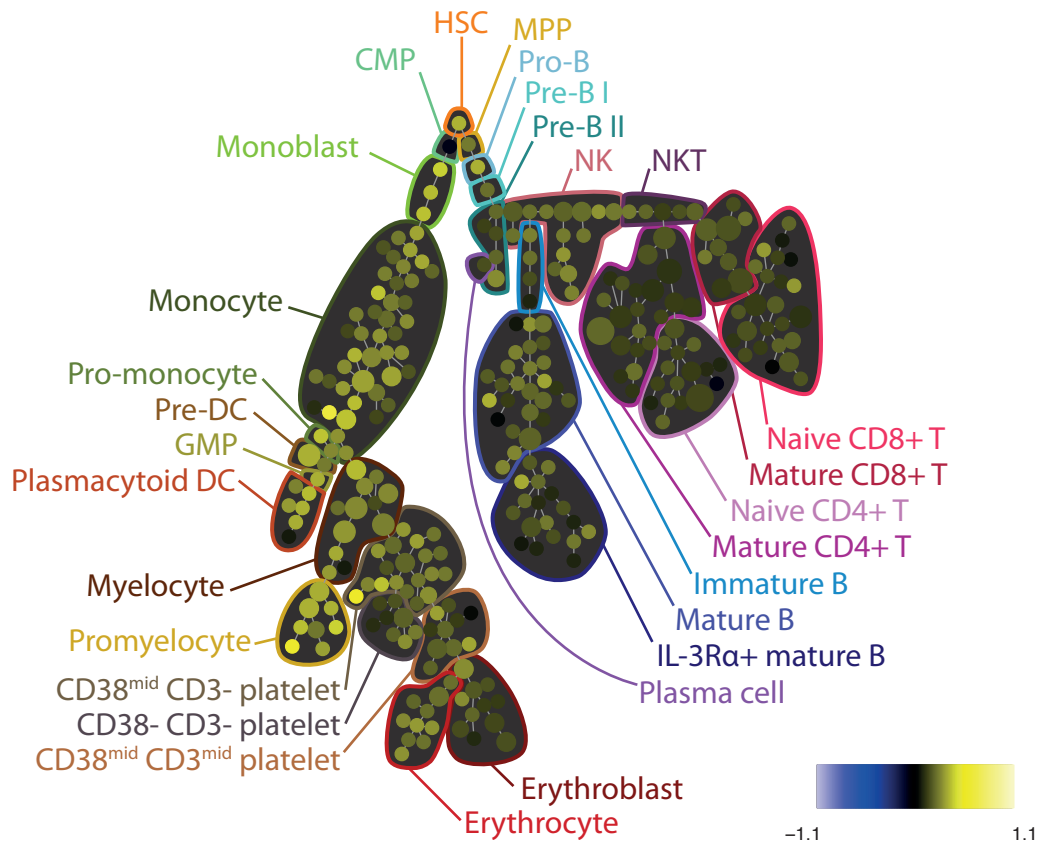

Figure S8A

153-pMAPKAPK2 ---- IL7 vs Ref Ratio

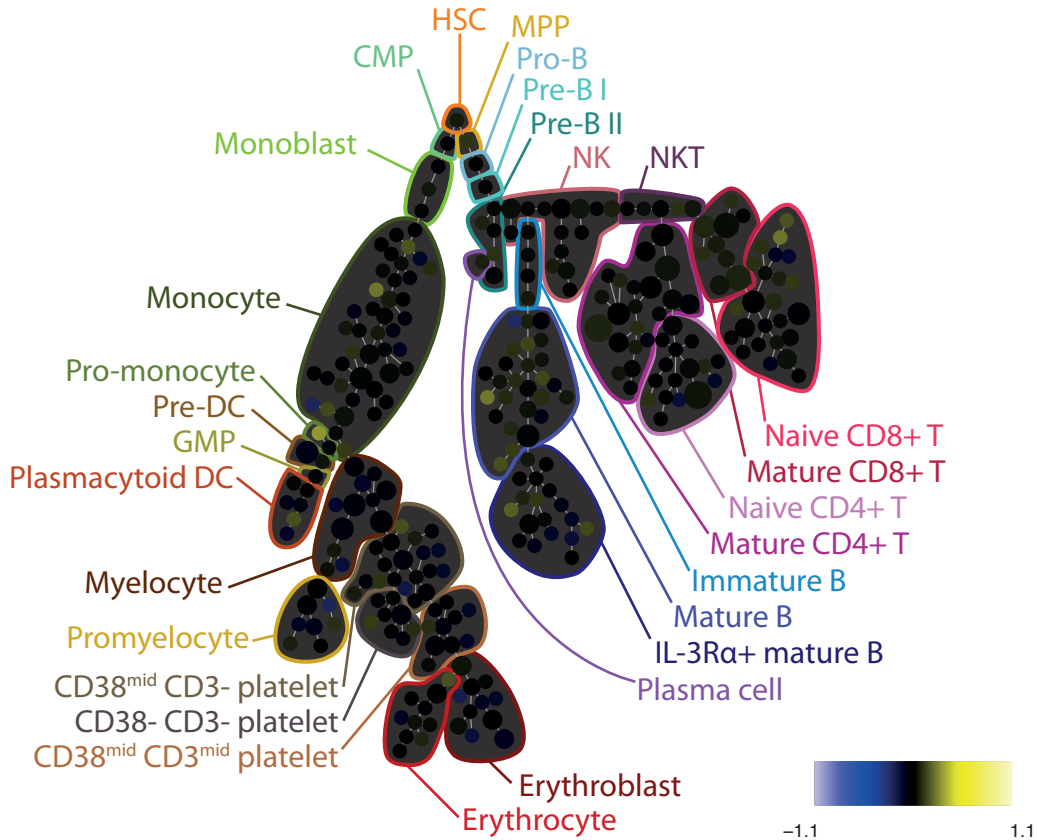



Figure S8A

153-pMAPKAPK2 ---- LPS vs Ref Ratio

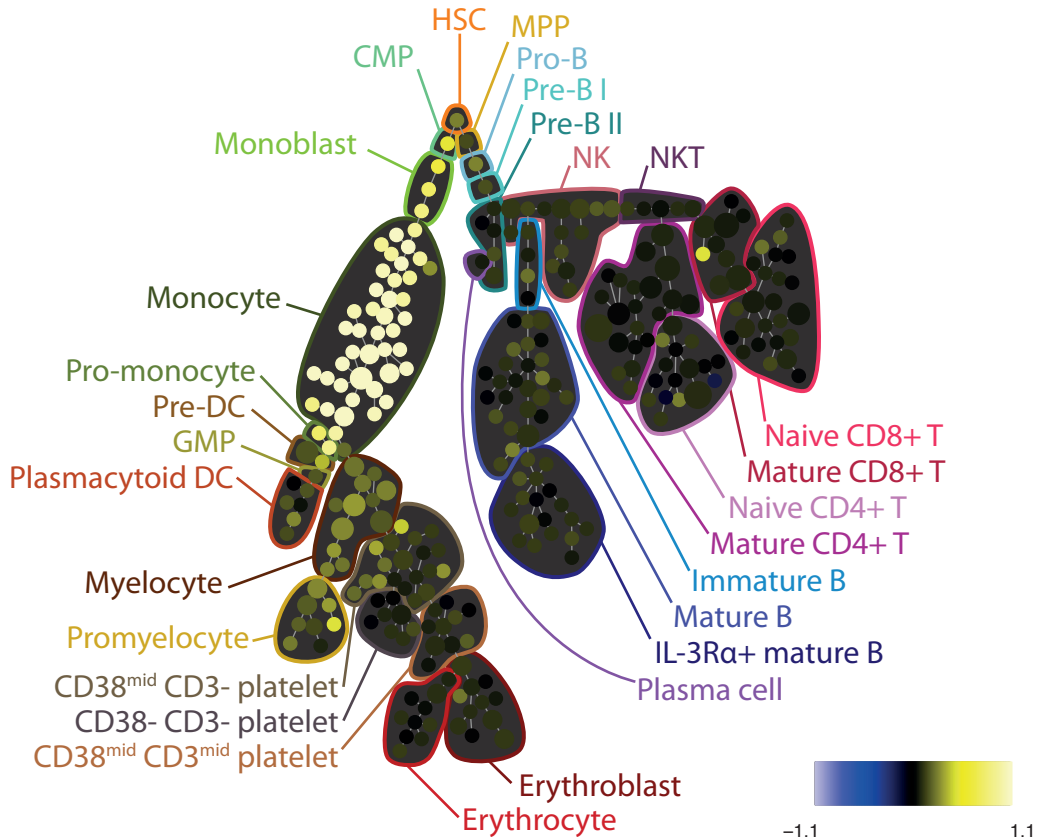

Figure S8A

153-pMAPKAPK2 ---- PMAiono vs Ref Ratio

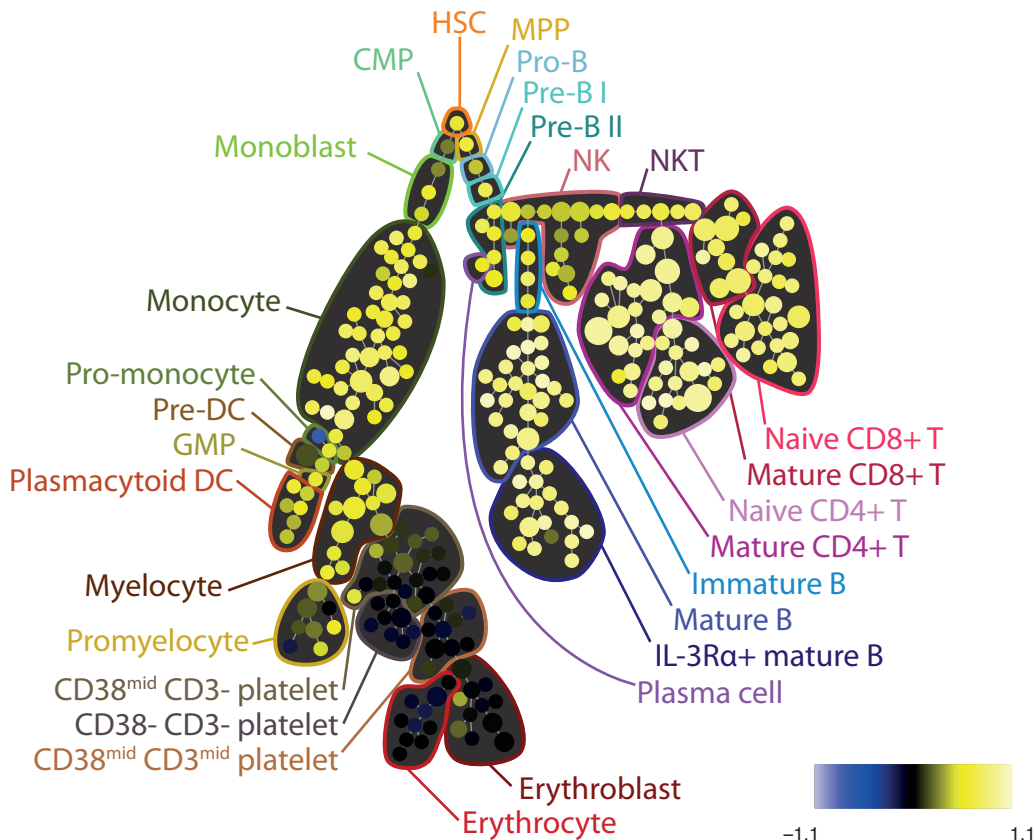

Figure S8A

153-pMAPKAPK2 ---- PVO4 vs Ref Ratio

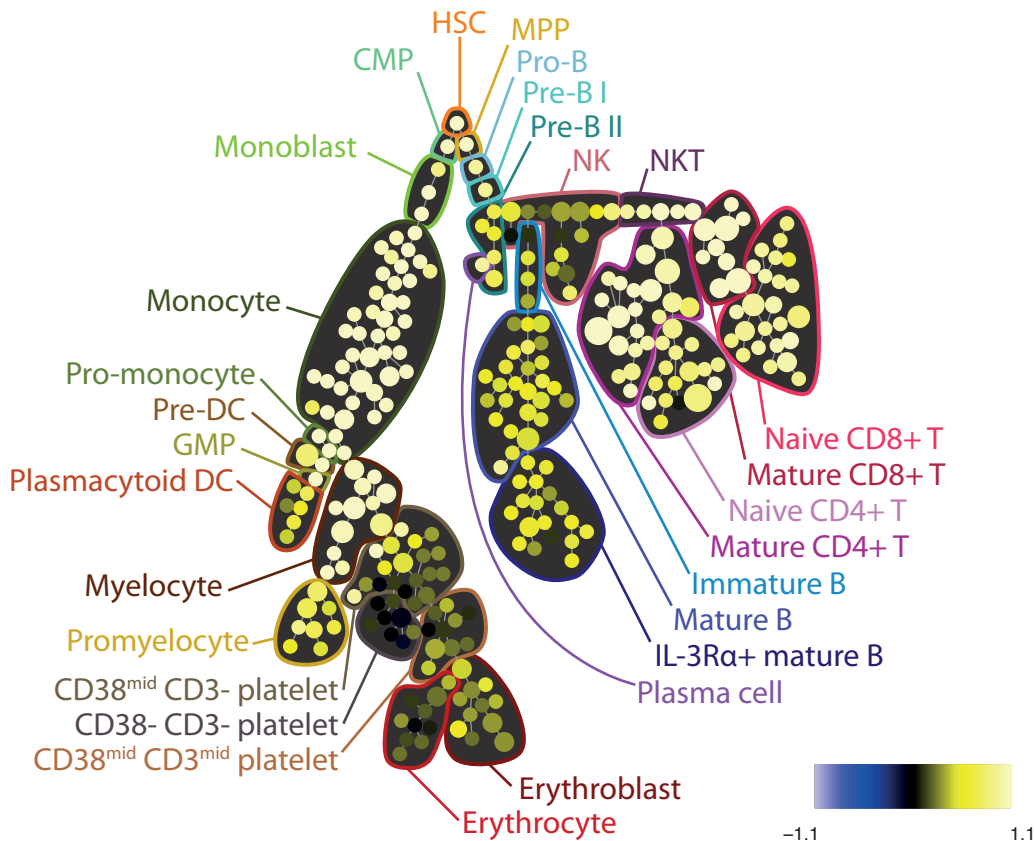

Figure S8A

153-pMAPKAPK2 ---- SCF vs Ref Ratio

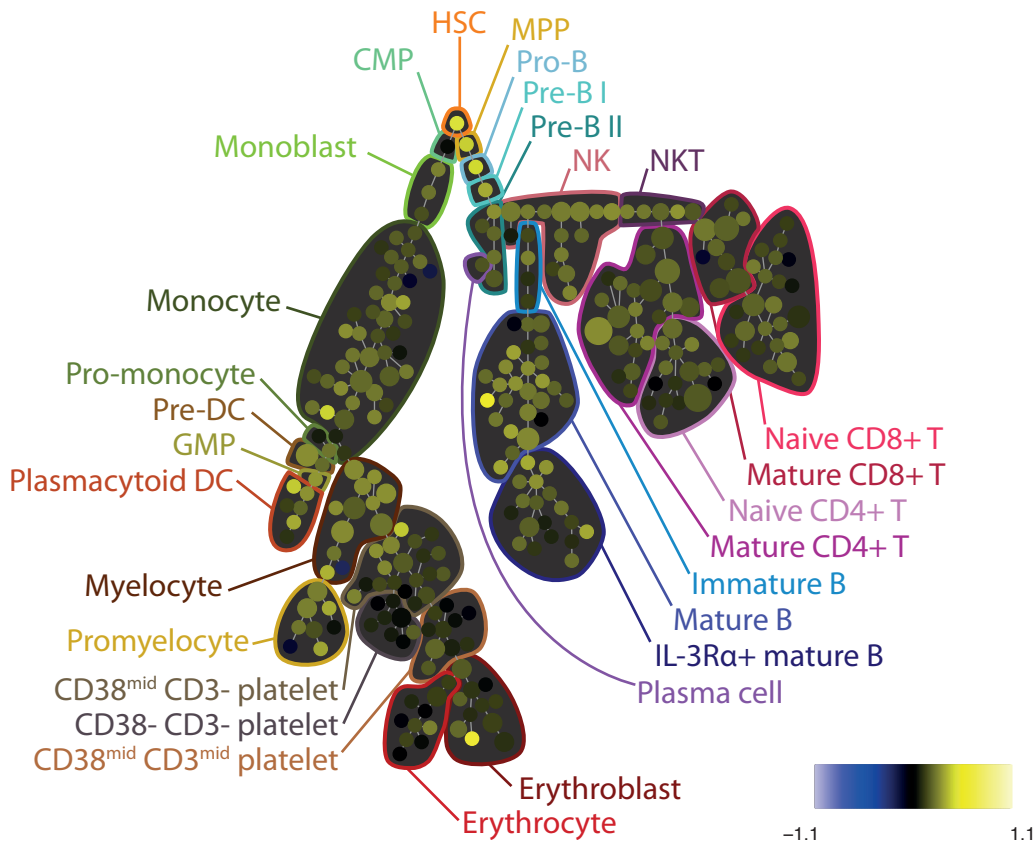

Figure S8A

153-pMAPKAPK2 ---- TNFa vs Ref Ratio

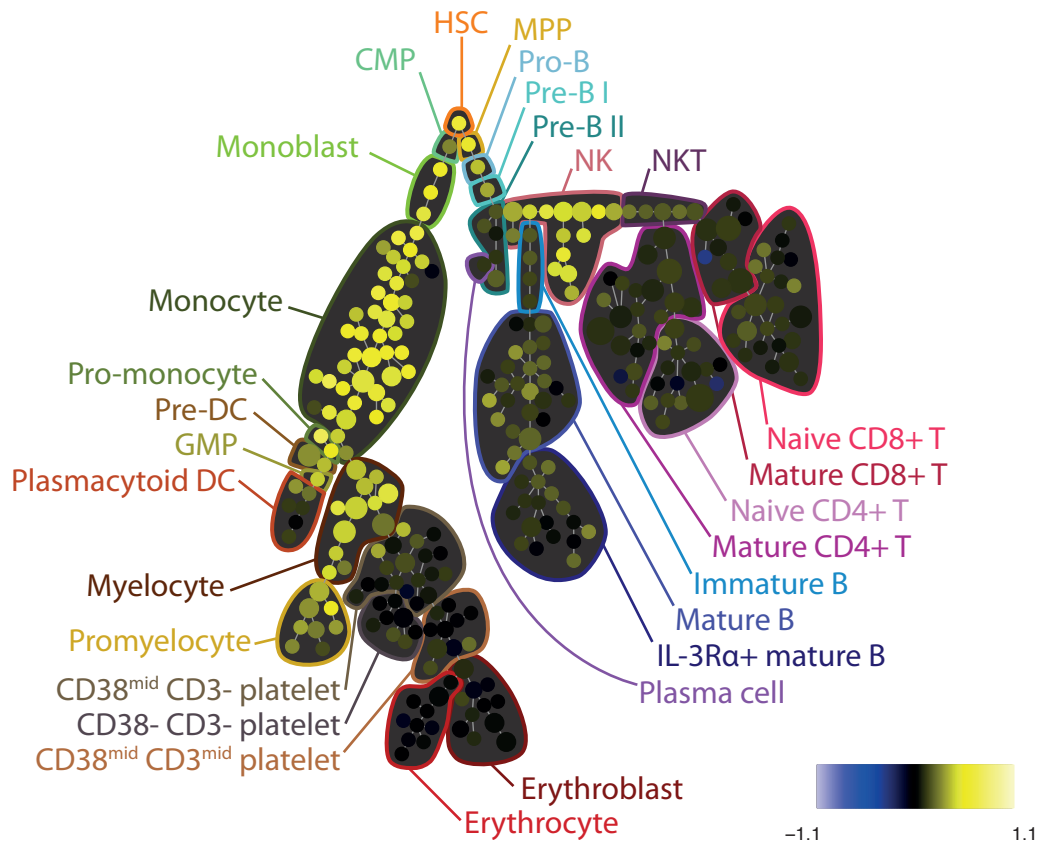

Figure S8A

153-pMAPKAPK2 ---- TPO vs Ref Ratio

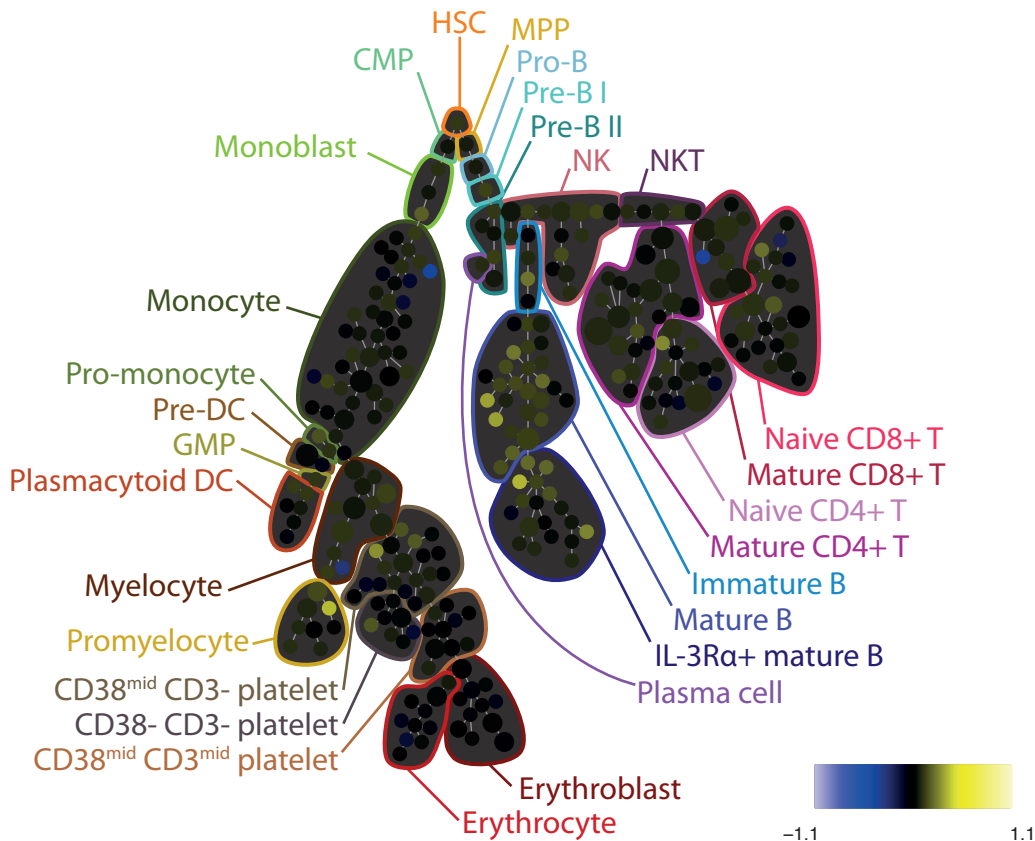

Figure S8A

154-pSHP2 ---- BCR vs Ref Ratio

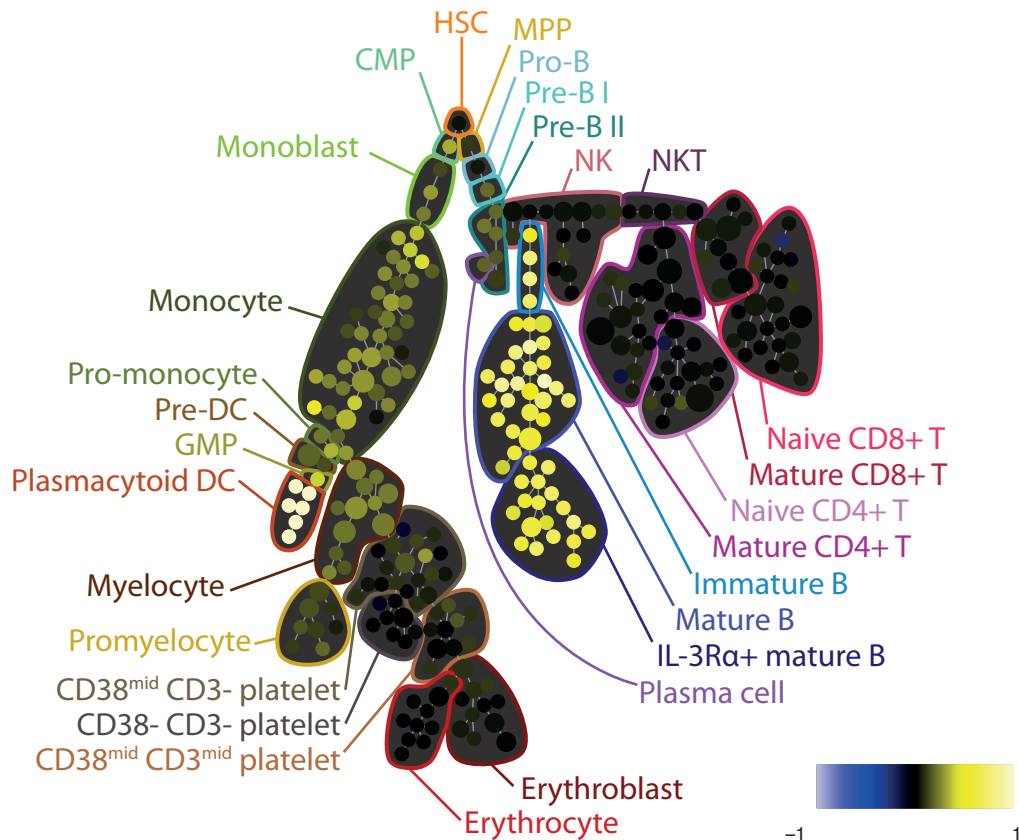

Figure S8A

154-pSHP2 ---- DMSO vs Ref Ratio

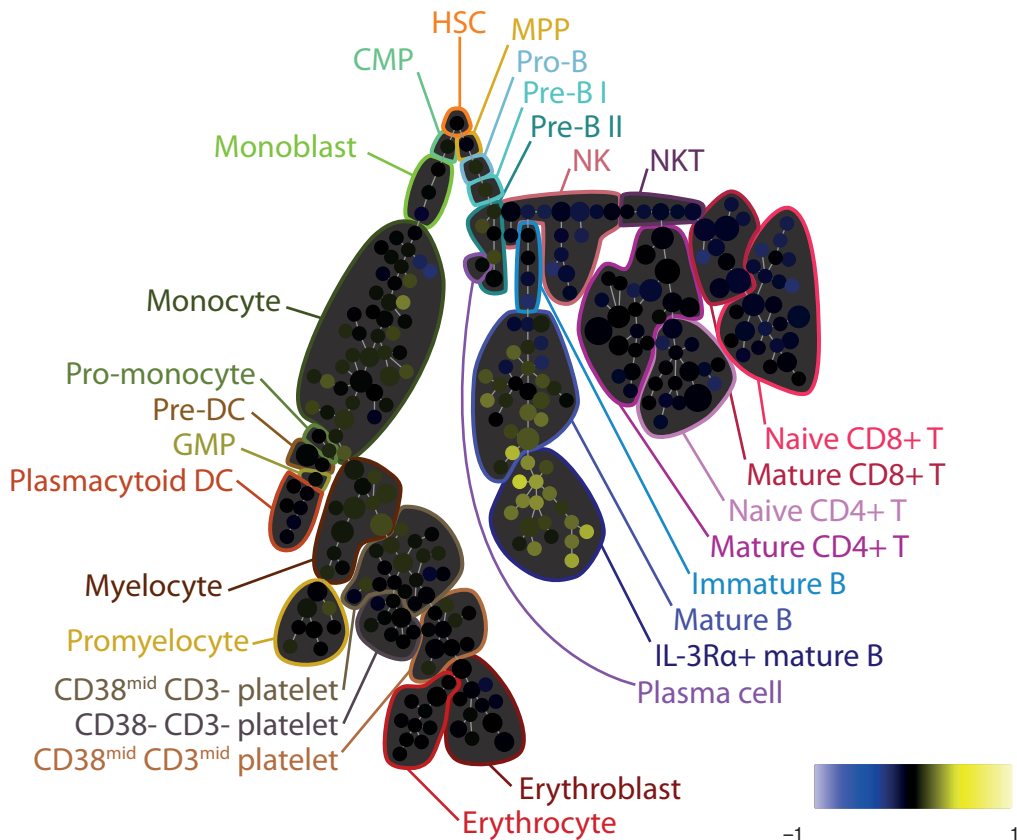



Figure S8A

154-pSHP2 ---- Flt3L vs Ref Ratio

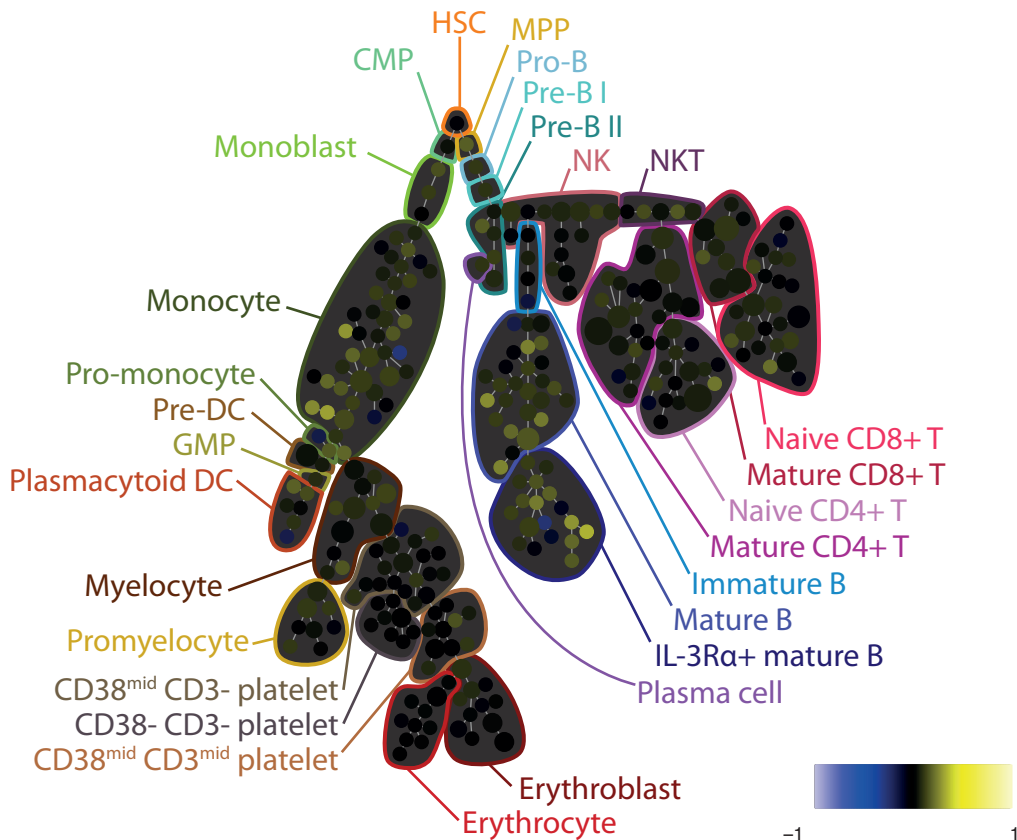

Figure S8A

154-pSHP2 ---- GCSF vs Ref Ratio

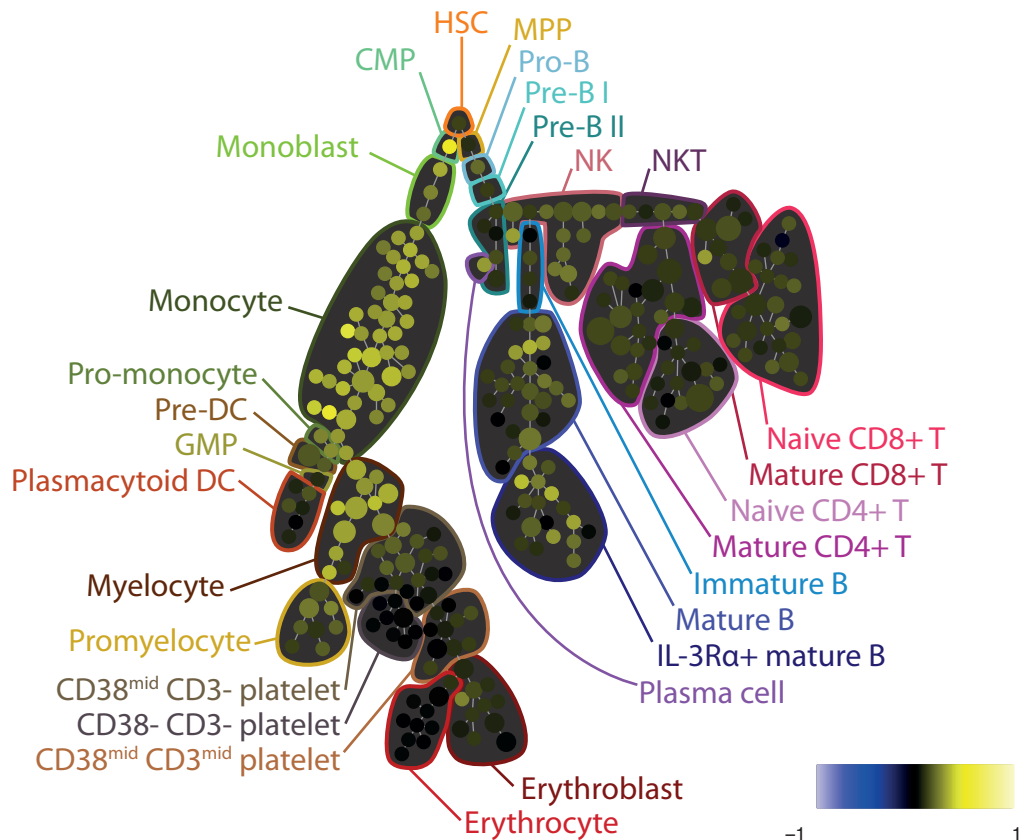

Figure S8A

154-pSHP2 ---- GMCSF vs Ref Ratio

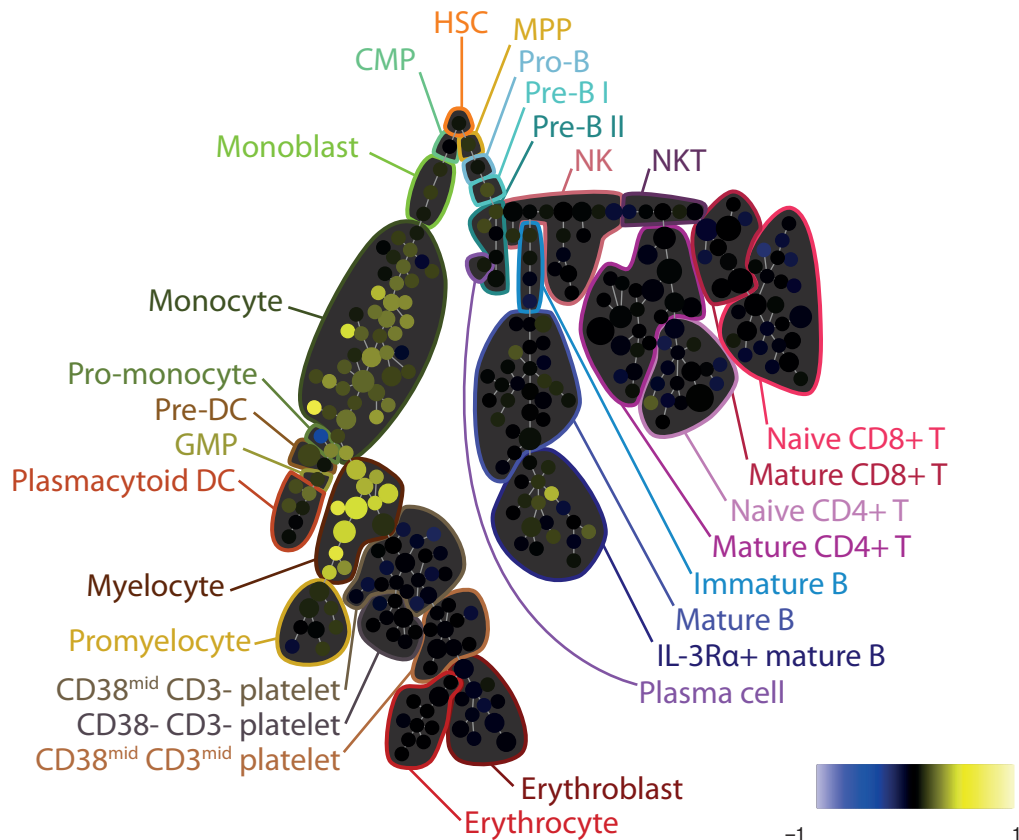

Figure S8A

154-pSHP2 ---- IFNad vs Ref Ratio

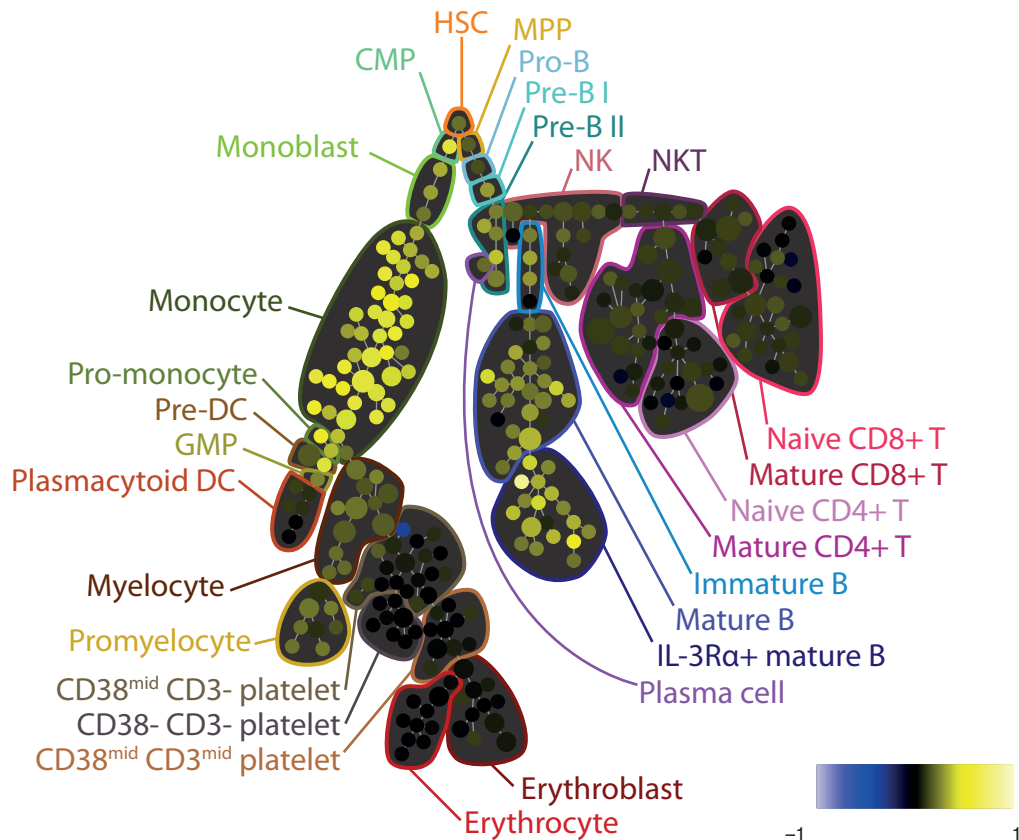

Figure S8A

154-pSHP2 ---- IL3 vs Ref Ratio

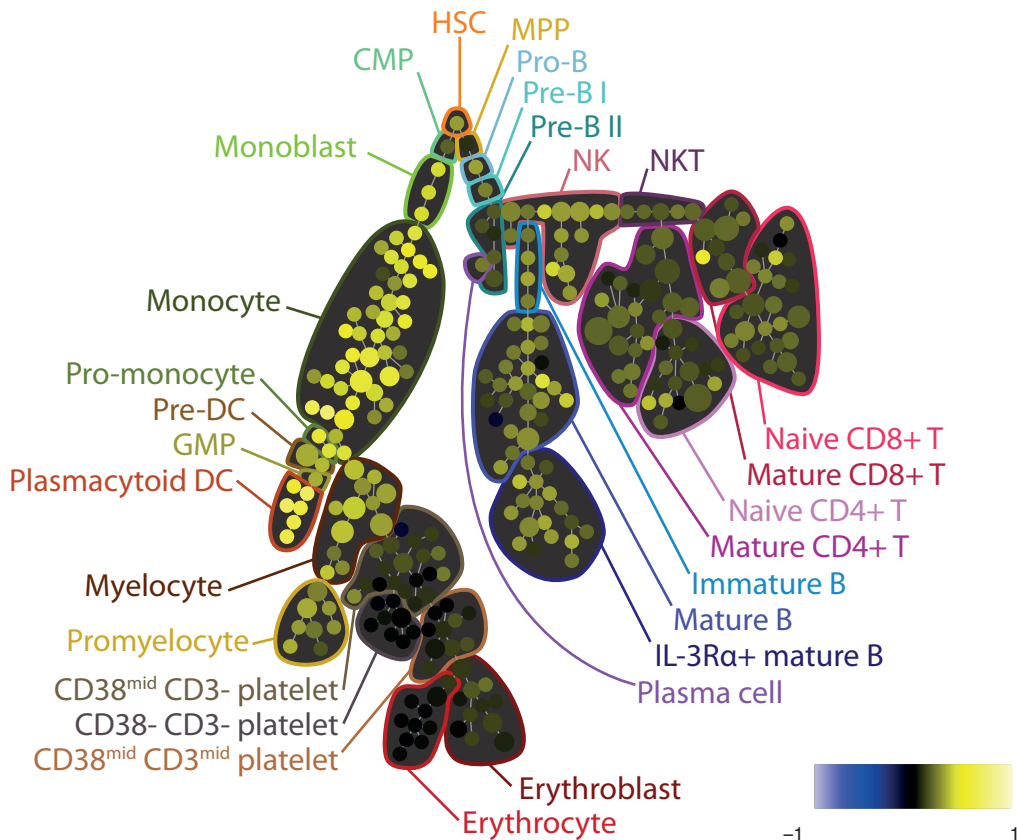

Figure S8A

154-pSHP2 ---- IL7 vs Ref Ratio

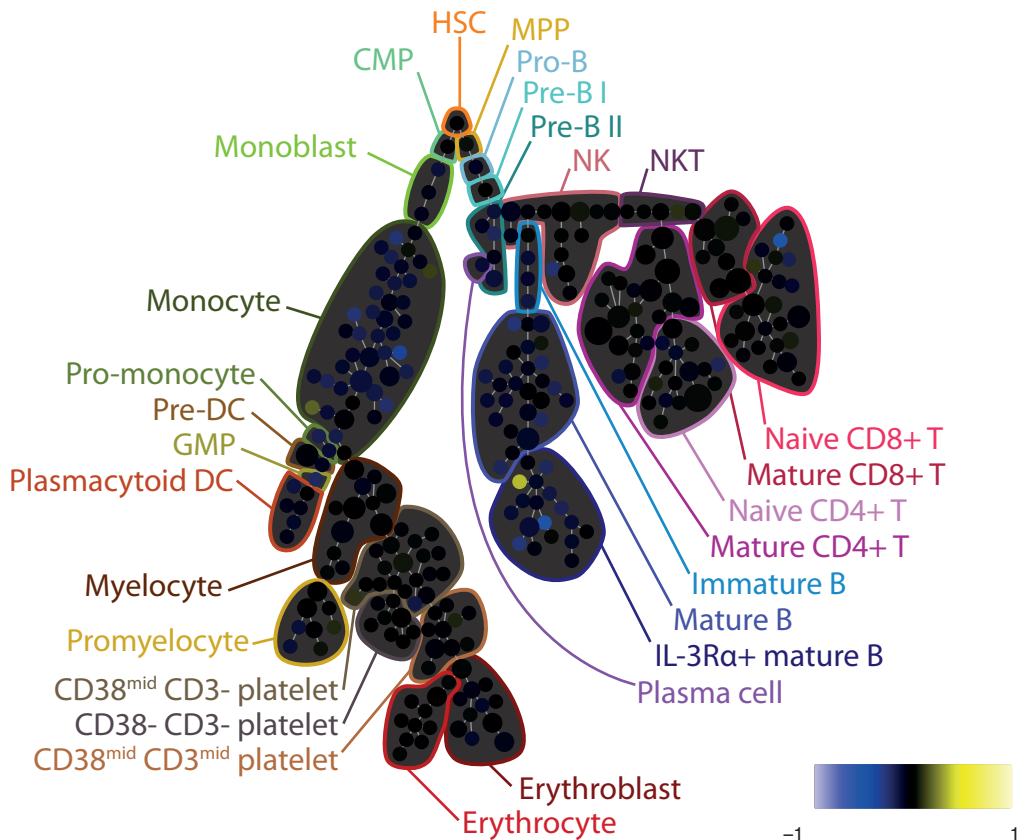

Figure S8A

154-pSHP2 ---- LPS vs Ref Ratio

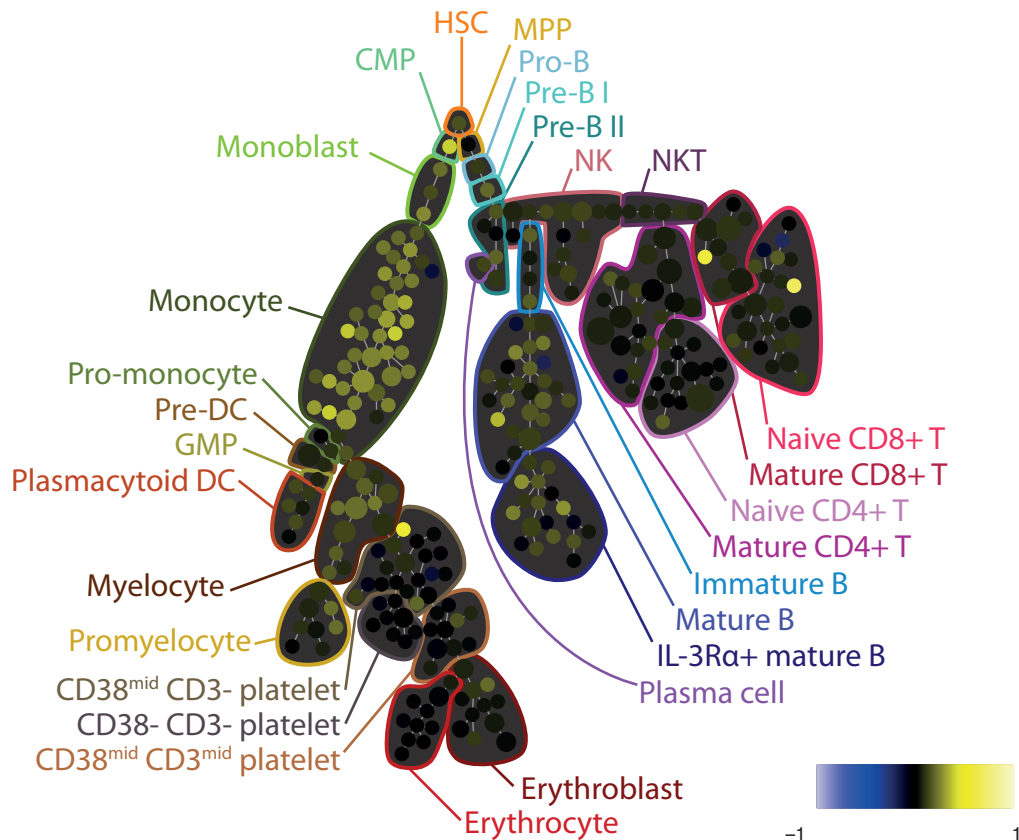

Figure S8A

154-pSHP2 ---- PMAiono vs Ref Ratio

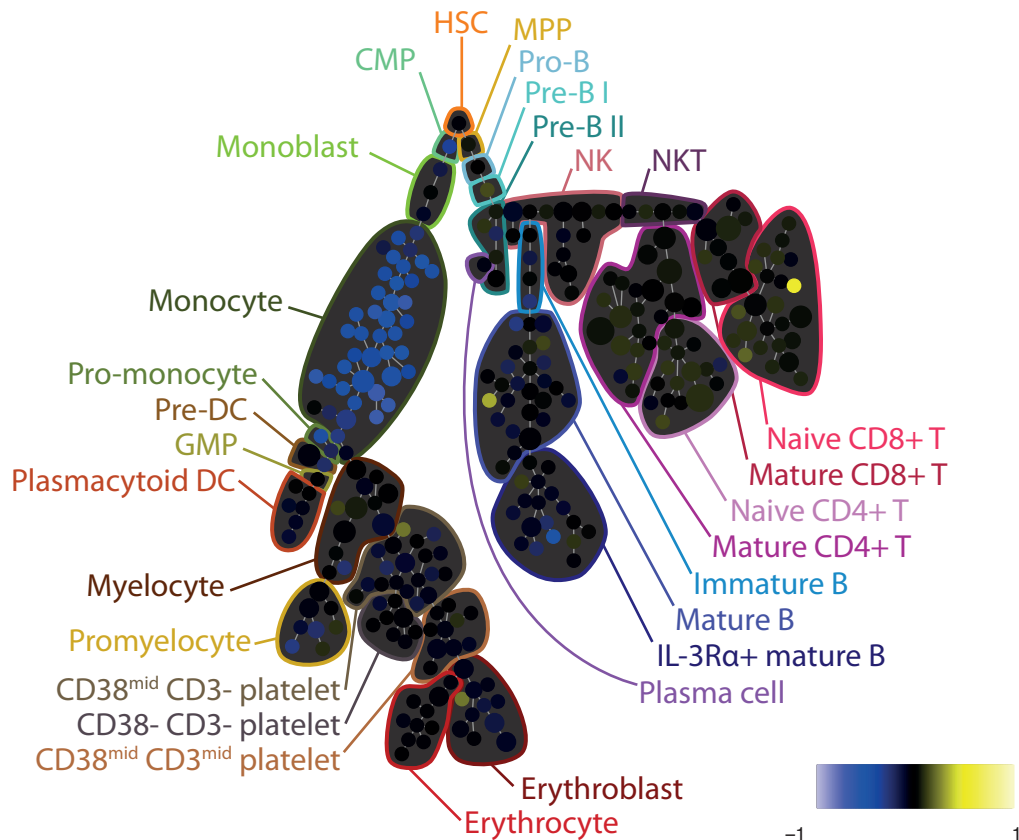



Figure S8A

154-pSHP2 ---- PVO4 vs Ref Ratio

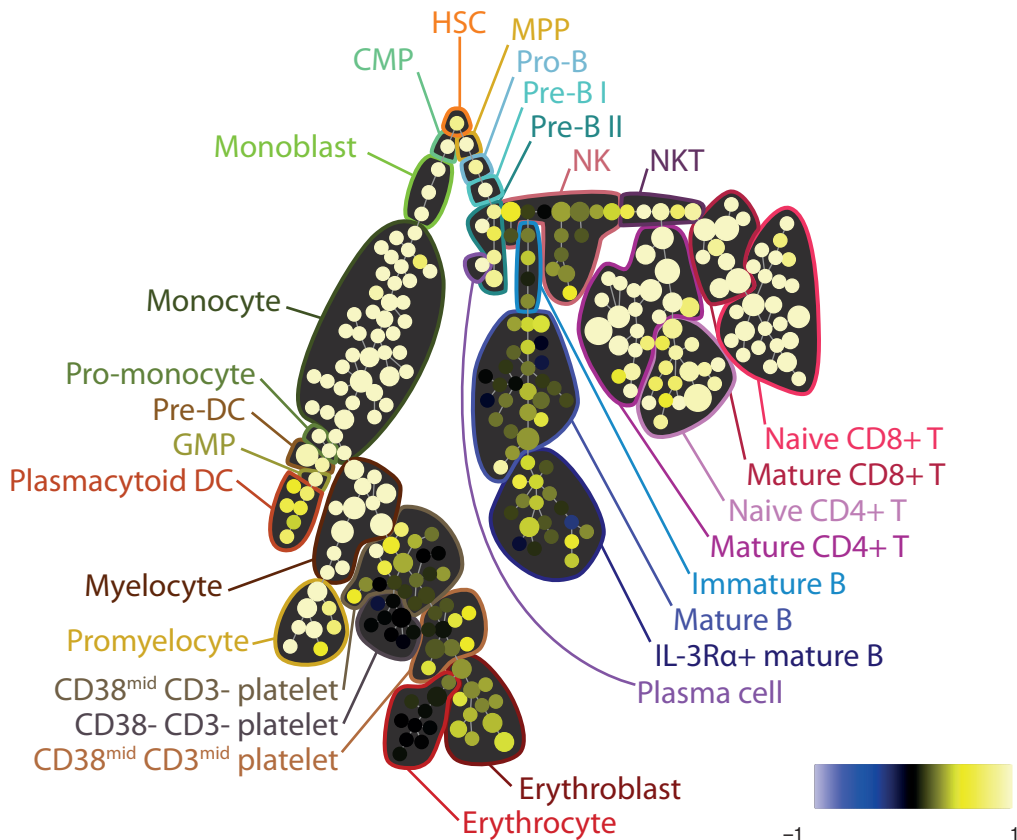

Figure S8A

154-pSHP2 ---- SCF vs Ref Ratio

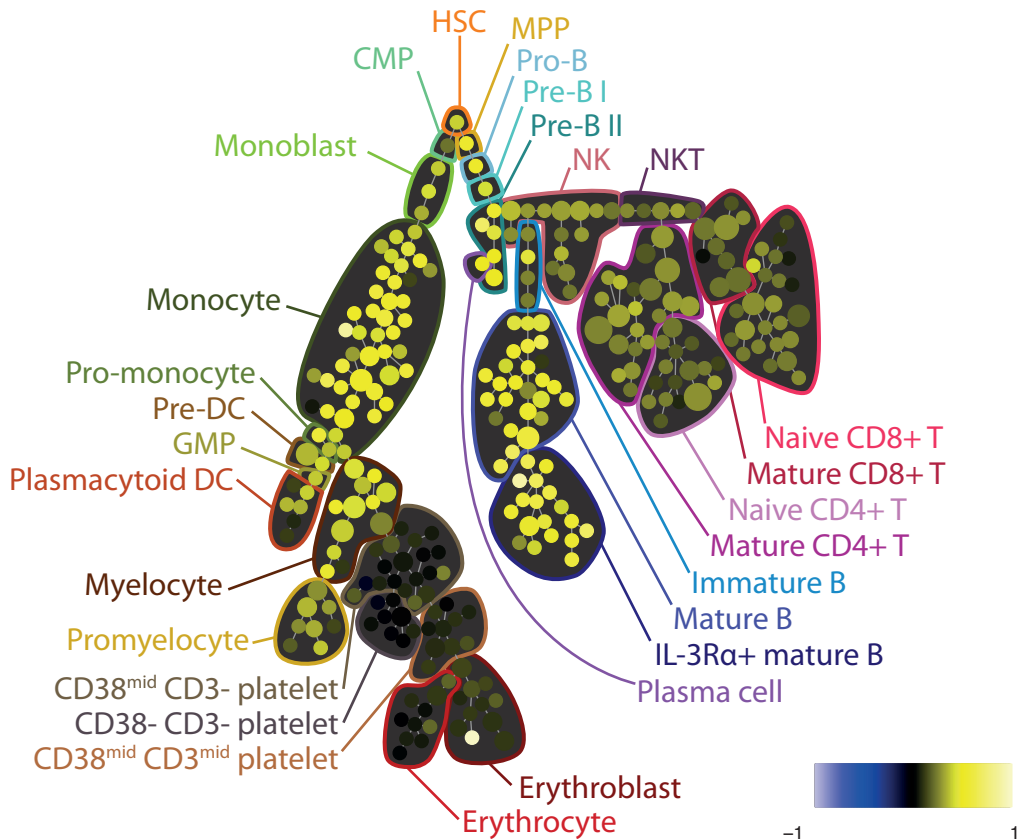

Figure S8A

154-pSHP2 ---- TNFa vs Ref Ratio

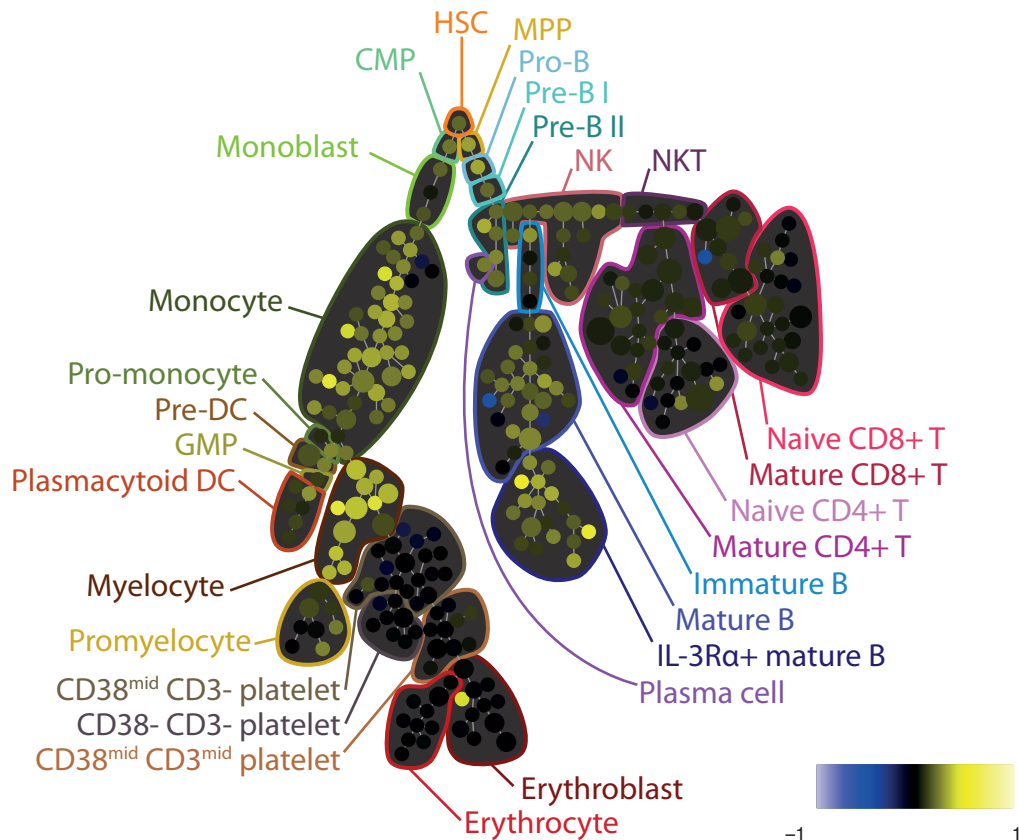

Figure S8A

154-pSHP2 ---- TPO vs Ref Ratio

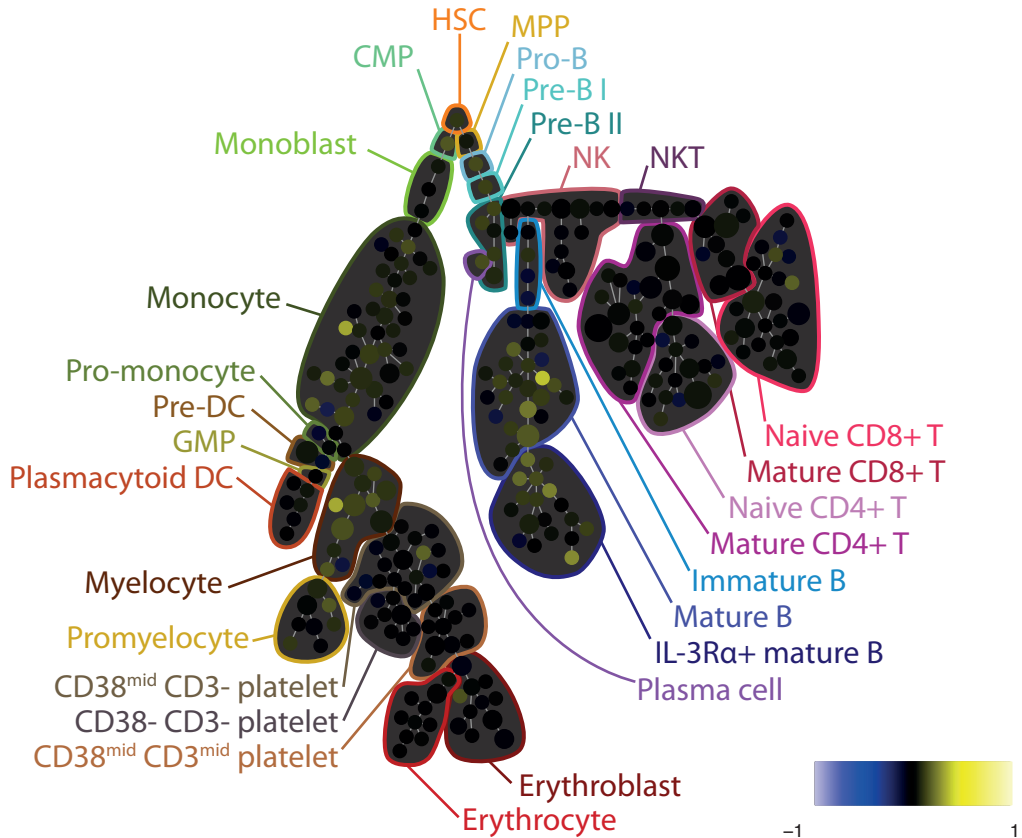

Figure S8A

156-pZAP70/Syk --- BCR vs Ref Ratio

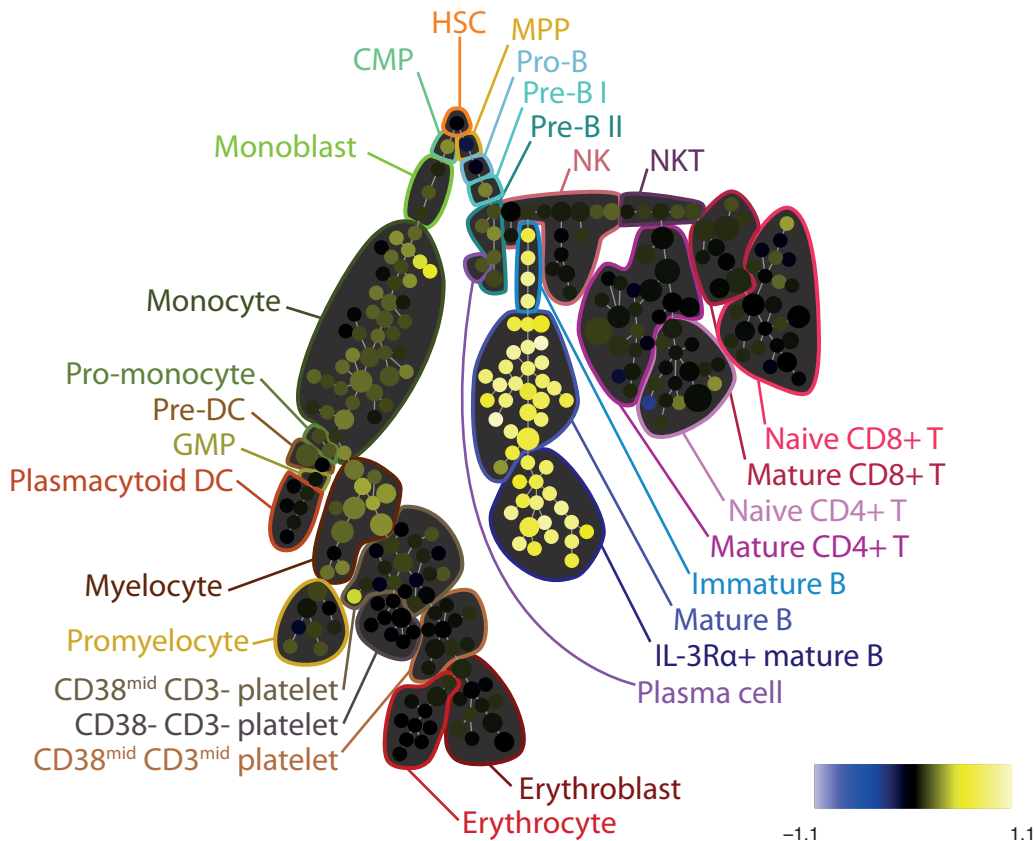

Figure S8A

156-pZAP70/Syk ---- DMSO vs Ref Ratio

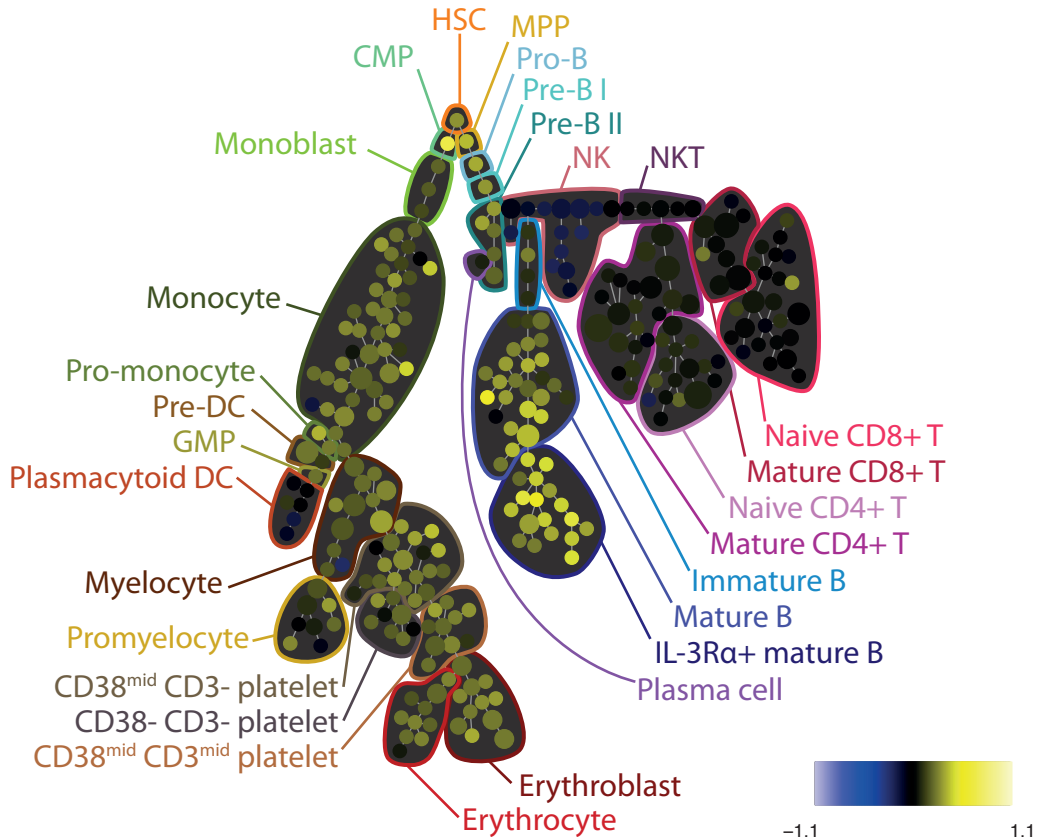

Figure S8A

156-pZAP70/Syk ---- Flt3L vs Ref Ratio

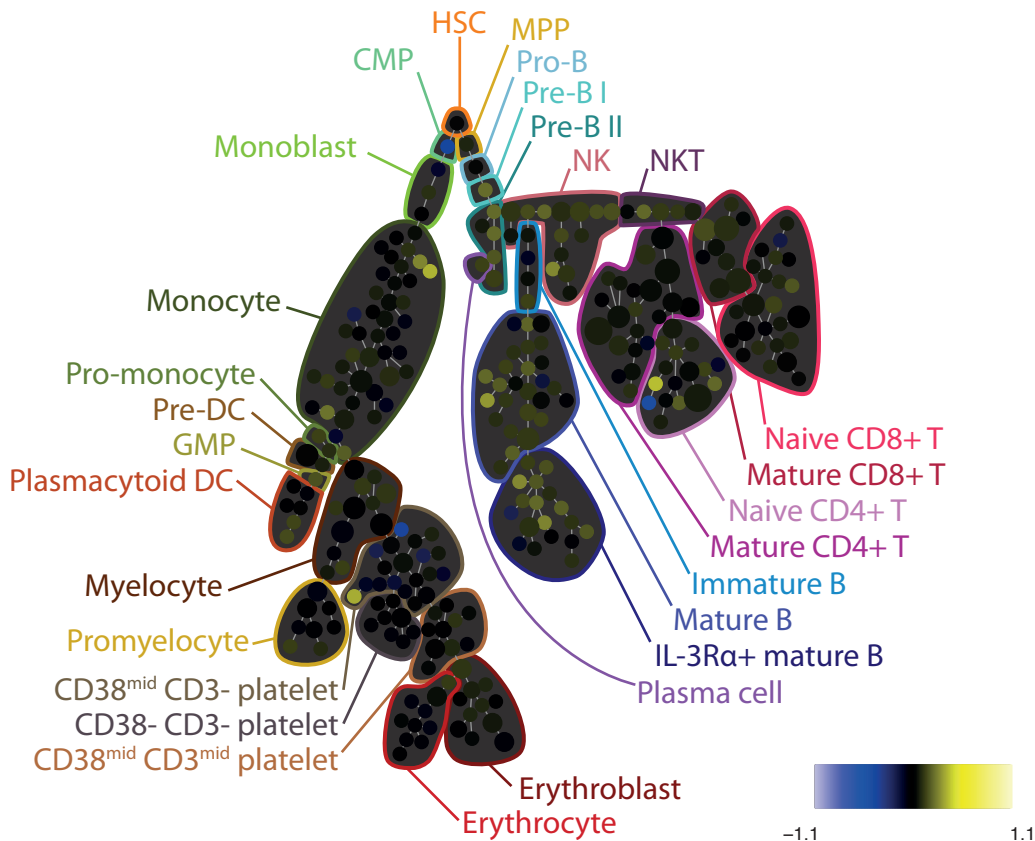

Figure S8A

156-pZAP70/Syk ---- GCSF vs Ref Ratio

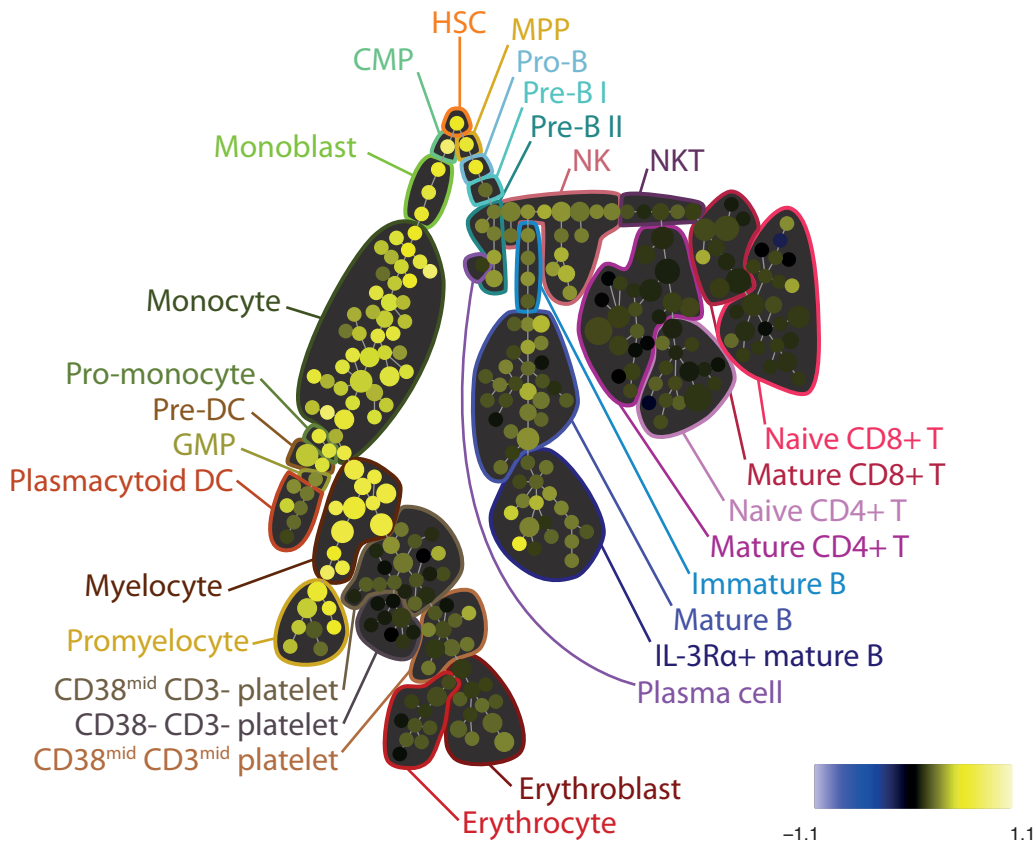



Figure S8A

156-pZAP70/Syk — GMCSF vs Ref Ratio

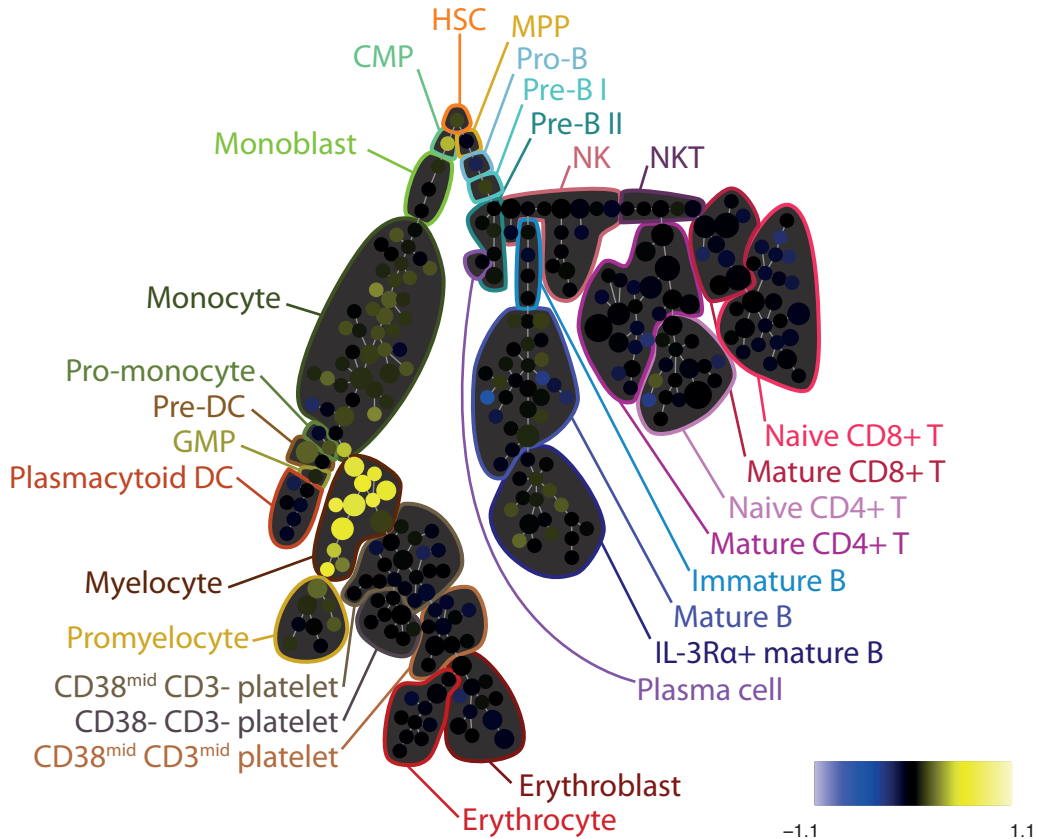

Figure S8A

156-pZAP70/Syk ---- IFN $\alpha$ d vs Ref Ratio

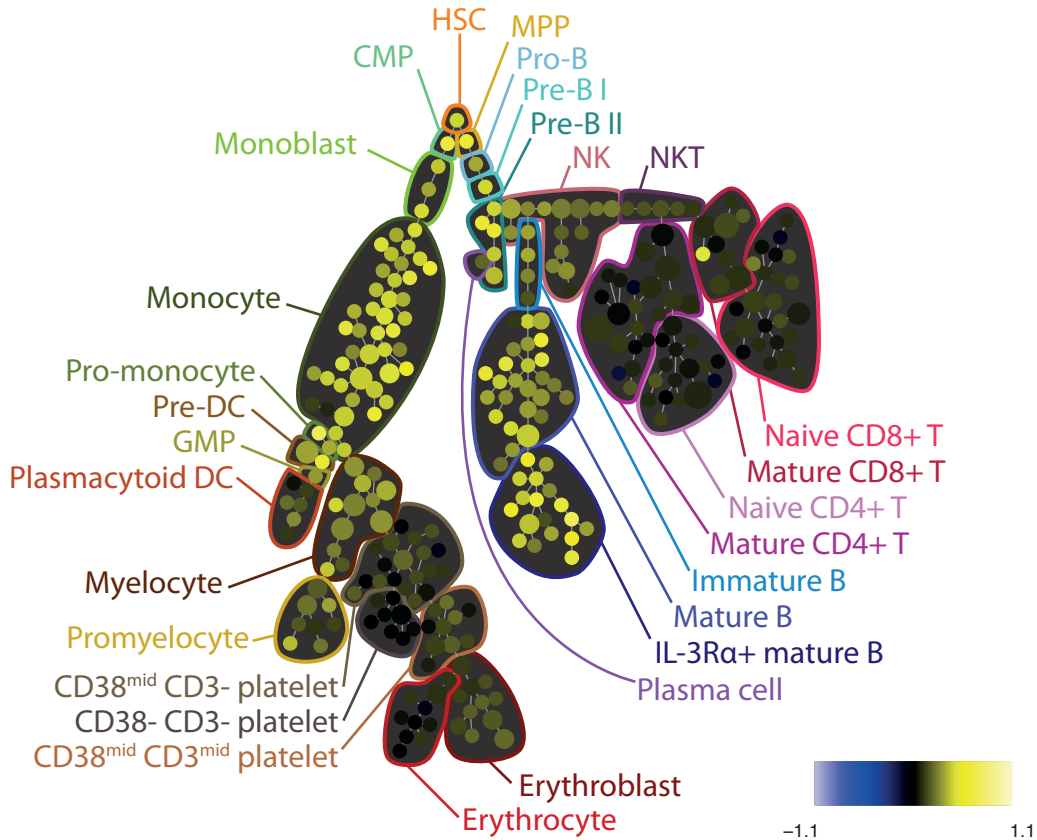

Figure S8A

156-pZAP70/Syk ---- IL3 vs Ref Ratio

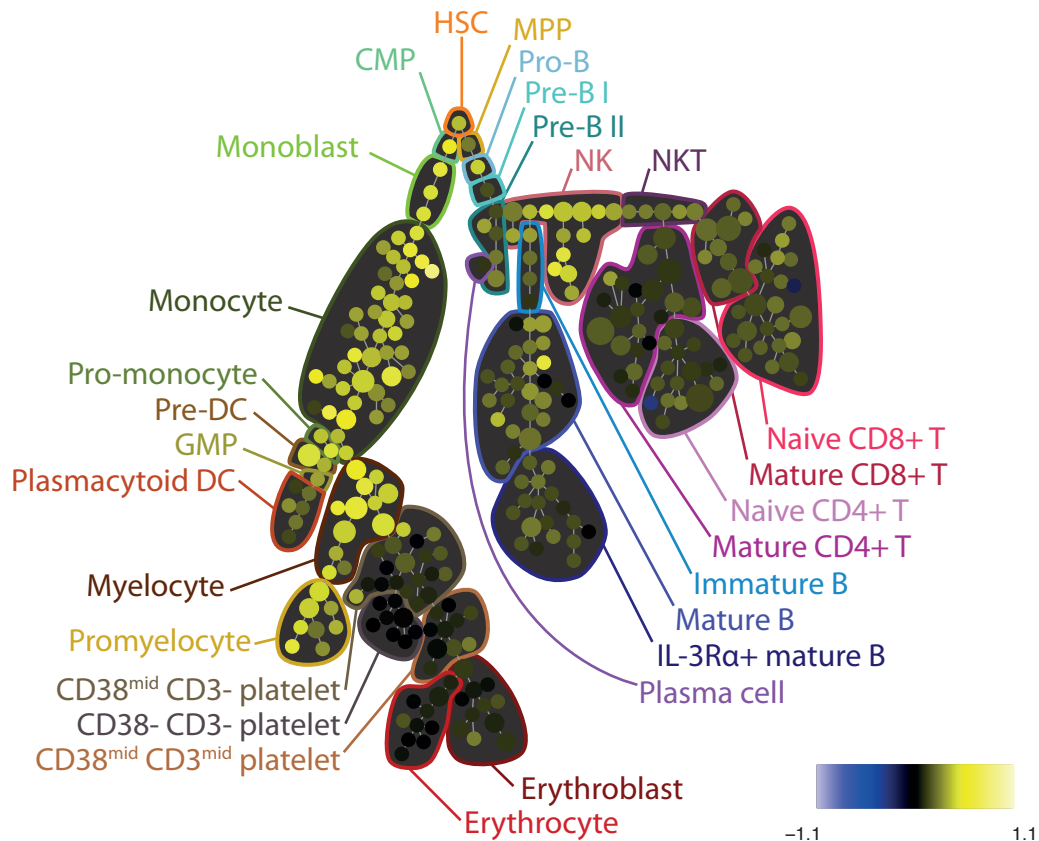

Figure S8A

156-pZAP70/Syk ---- IL7 vs Ref Ratio

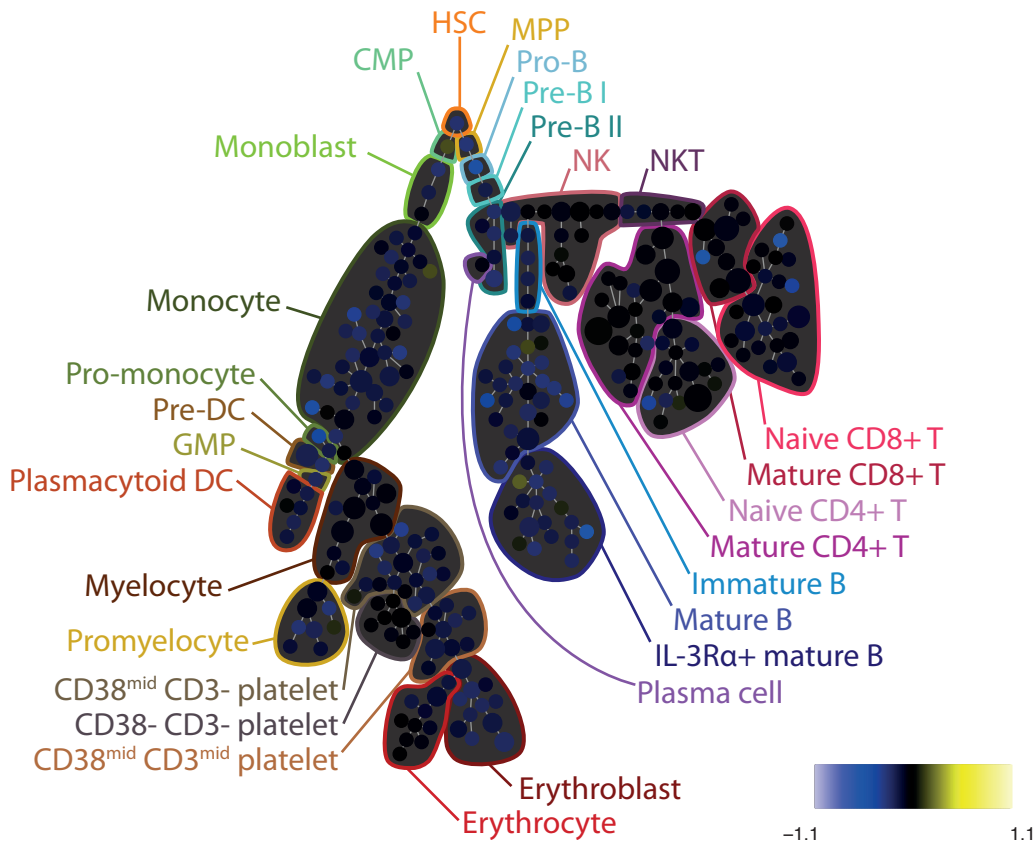

Figure S8A

156-pZAP70/Syk ---- LPS vs Ref Ratio

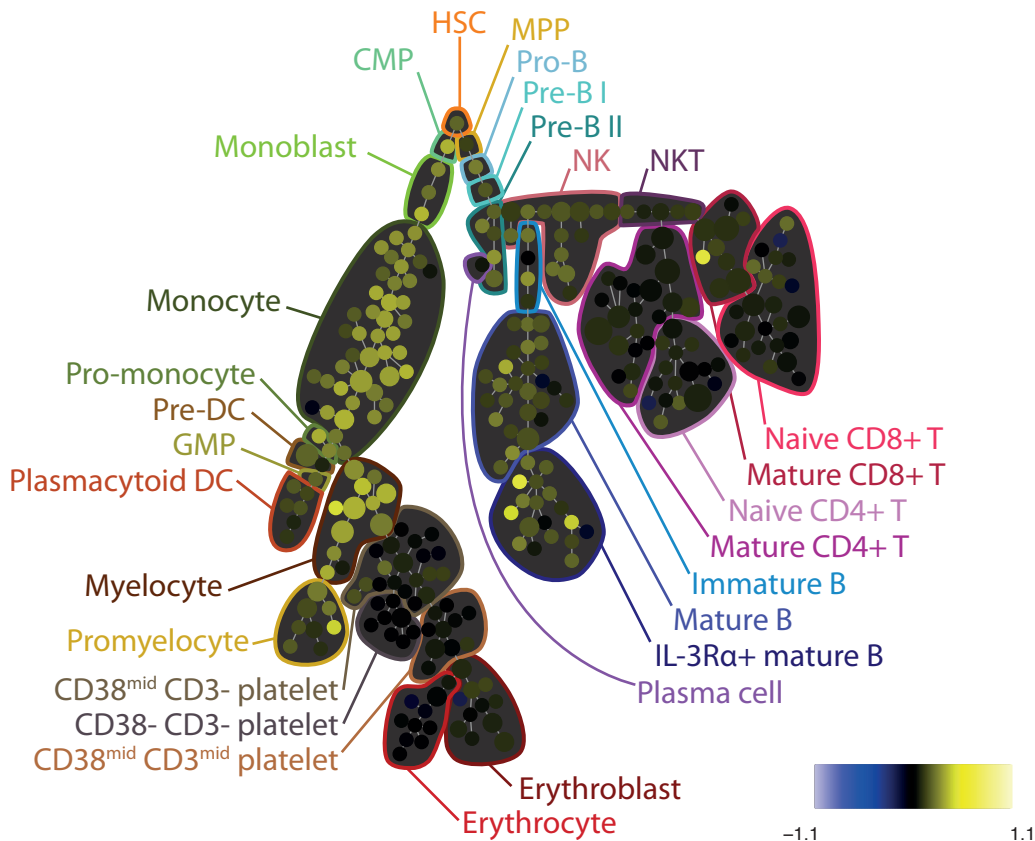

Figure S8A

156-pZAP70/Syk ---- PMAiono vs Ref Ratio

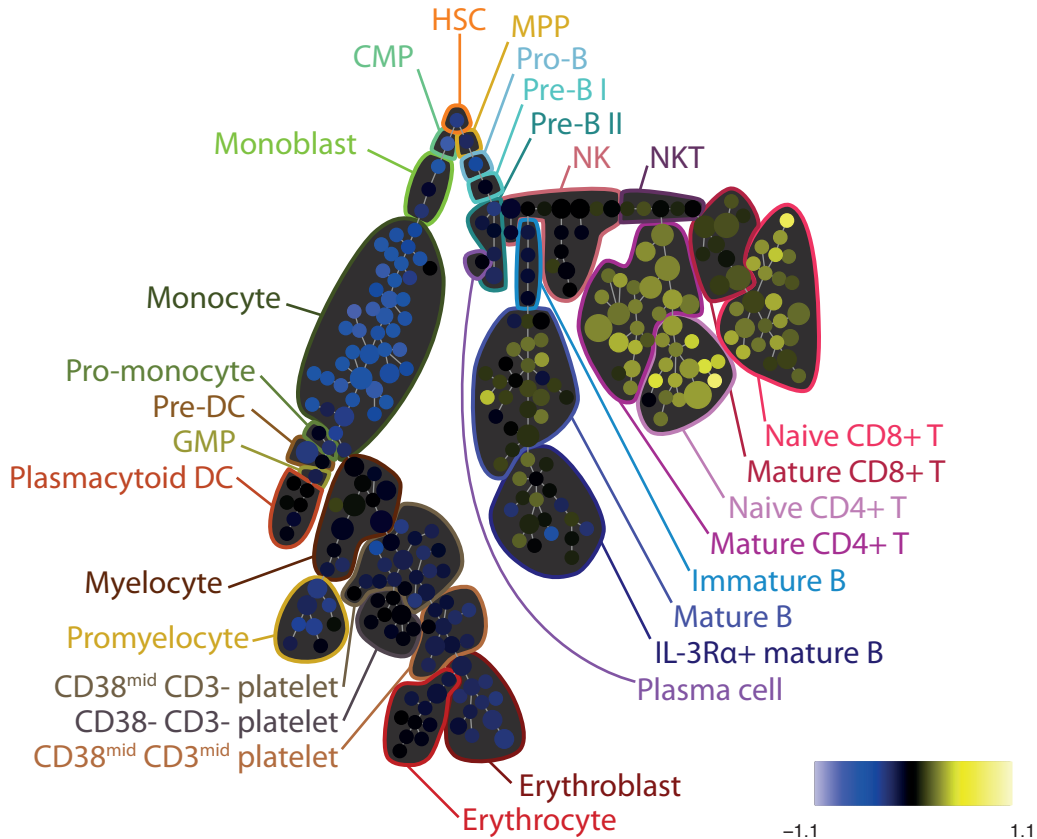

Figure S8A

156-pZAP70/Syk ---- PVO4 vs Ref Ratio

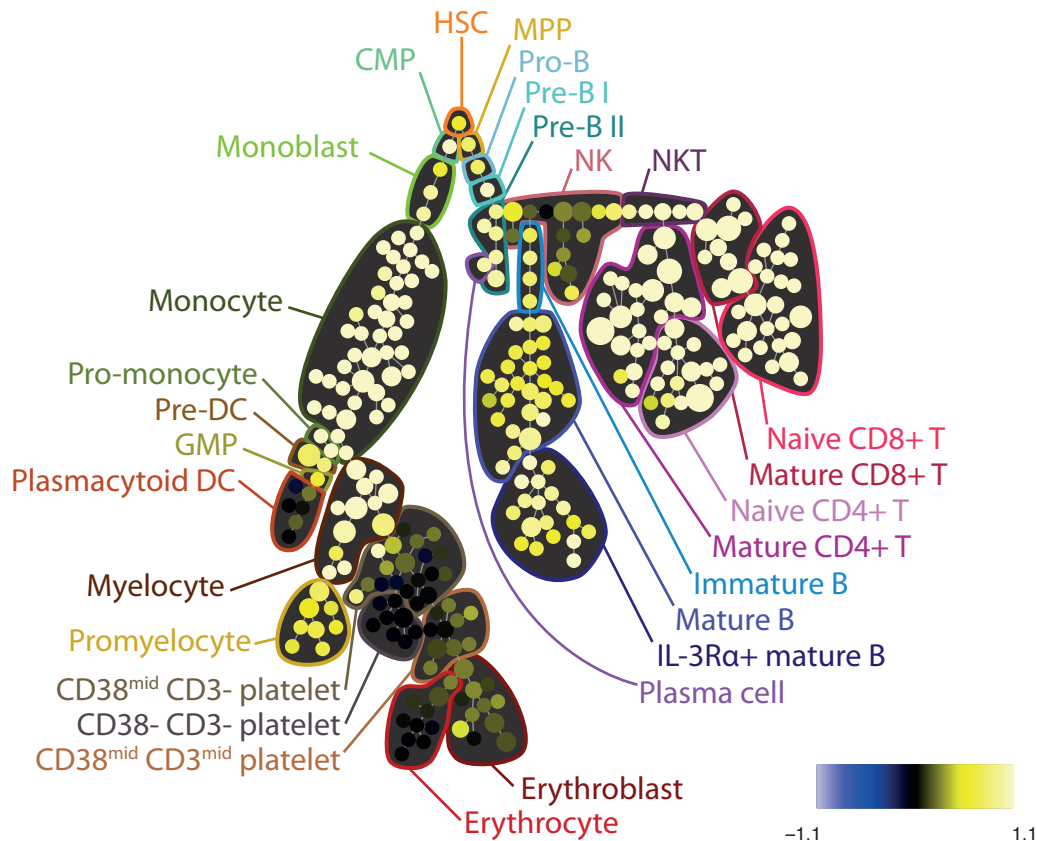

Figure S8A

156-pZAP70/Syk ---- SCF vs Ref Ratio

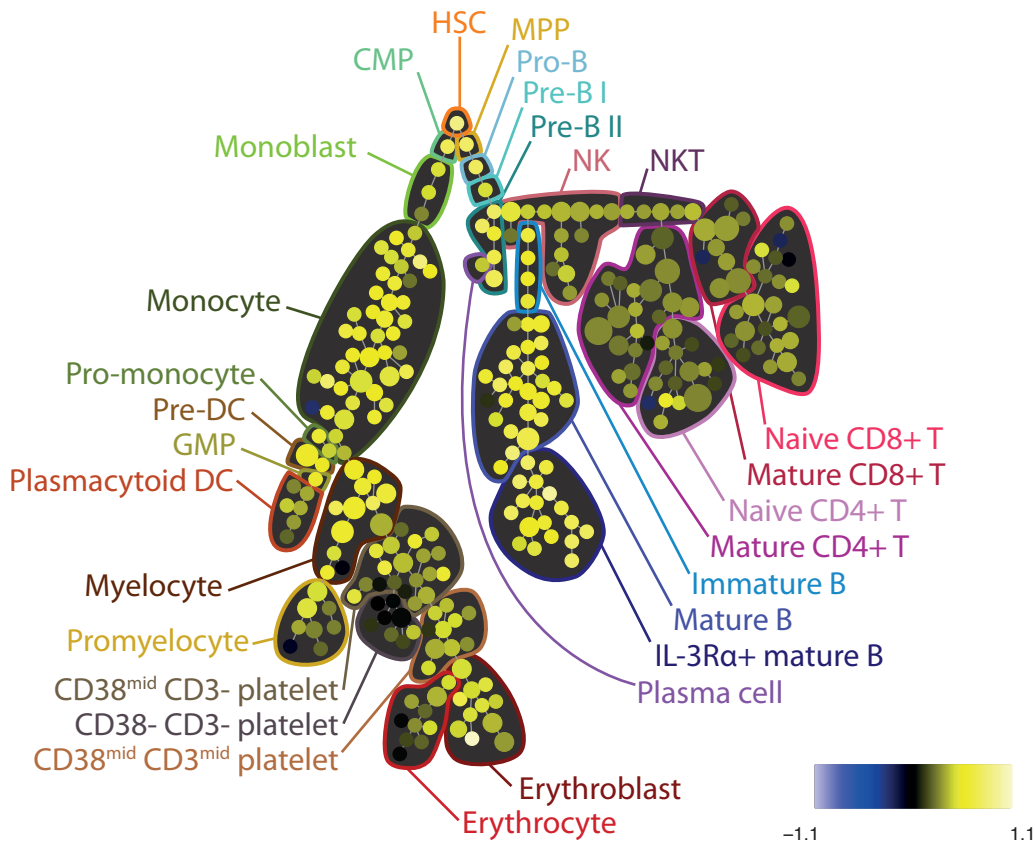



Figure S8A

156-pZAP70/Syk — TNFa vs Ref Ratio

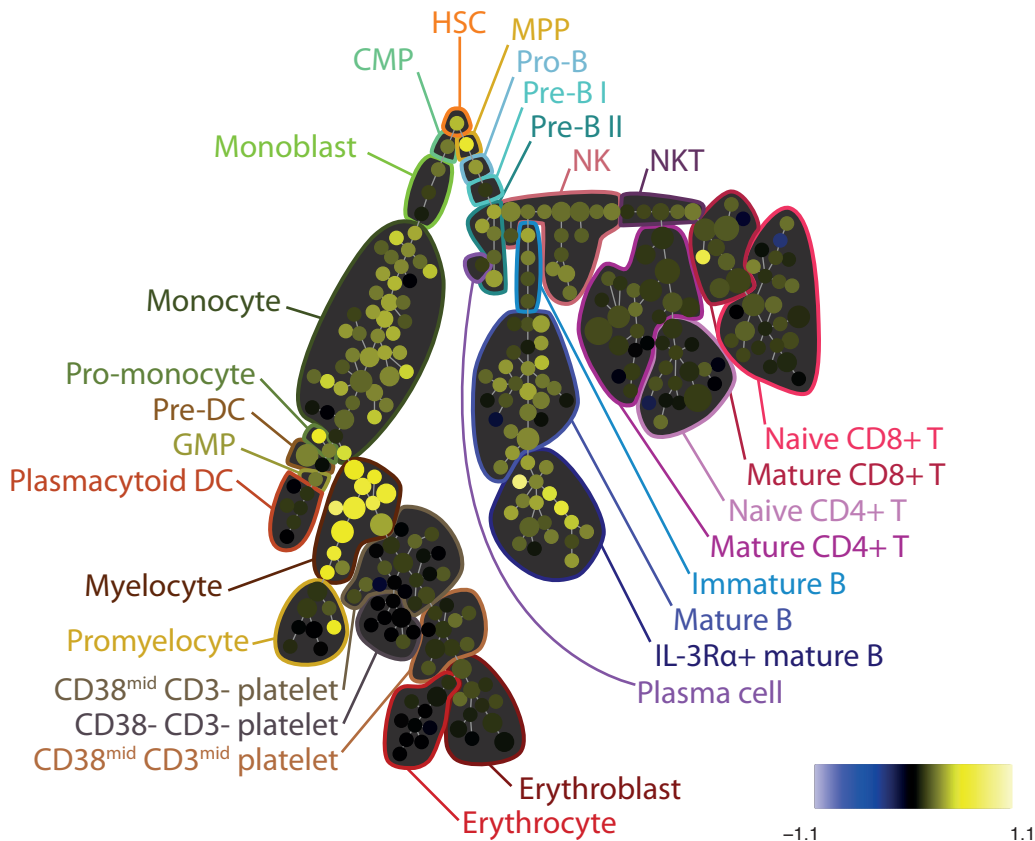

Figure S8A

156-pZAP70/Syk ---- TPO vs Ref Ratio

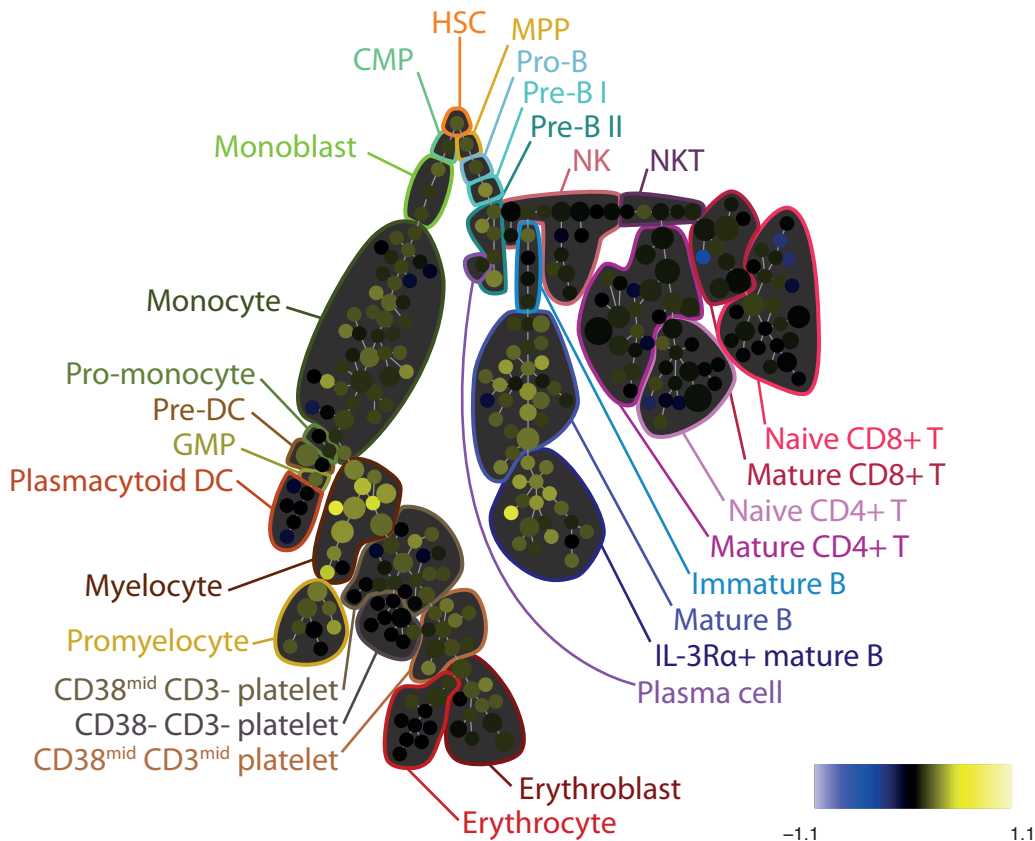

Figure S8A

159-pSTAT3 ---- BCR vs Ref Ratio

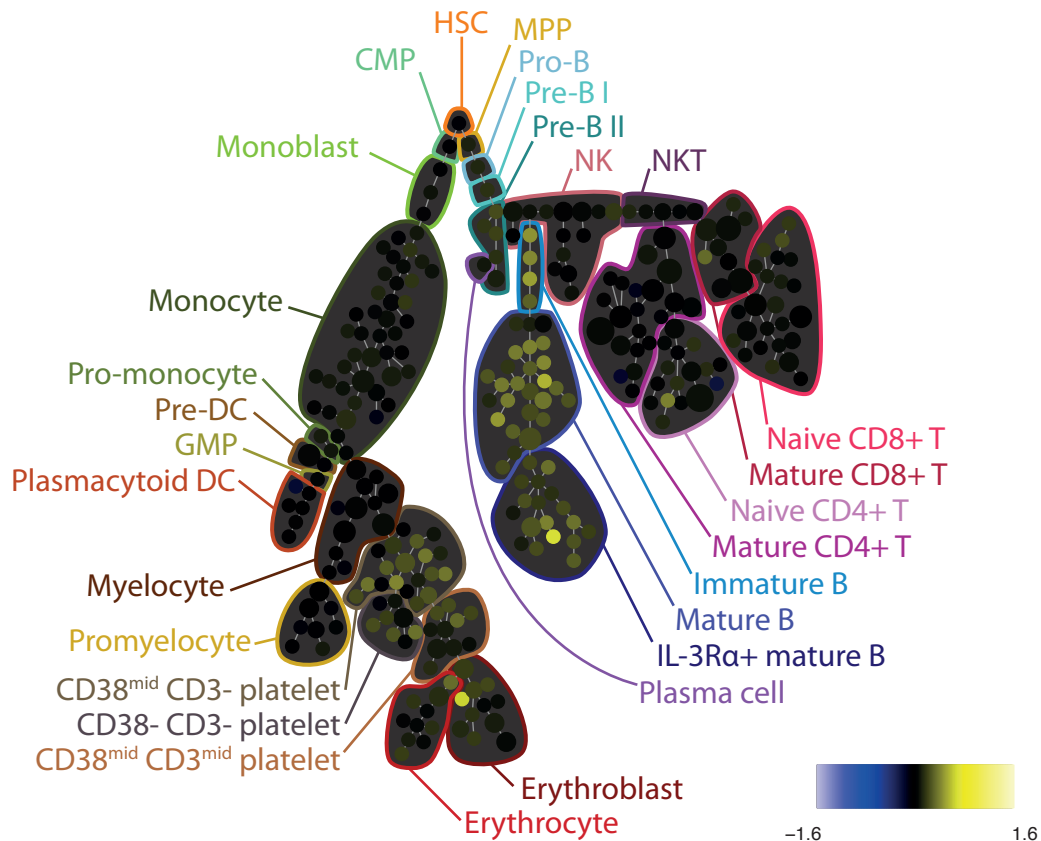

Figure S8A

159-pSTAT3 ---- DMSO vs Ref Ratio

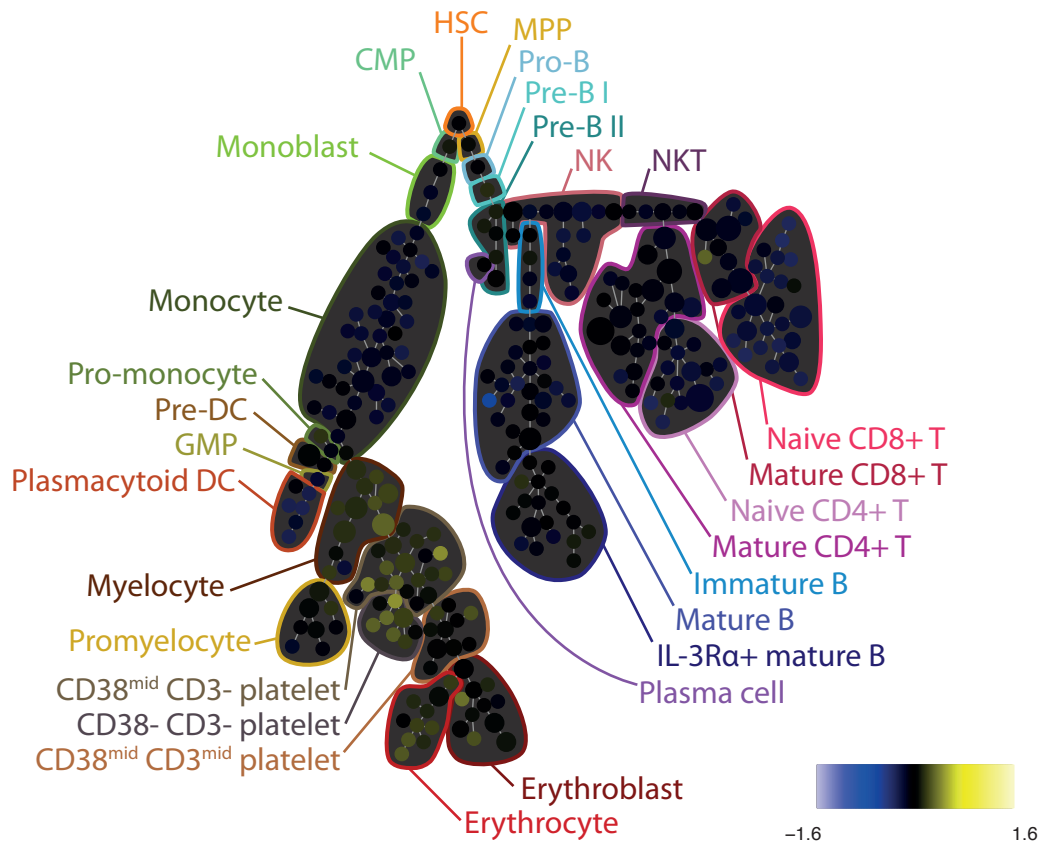

Figure S8A

159-pSTAT3 ---- Flt3L vs Ref Ratio

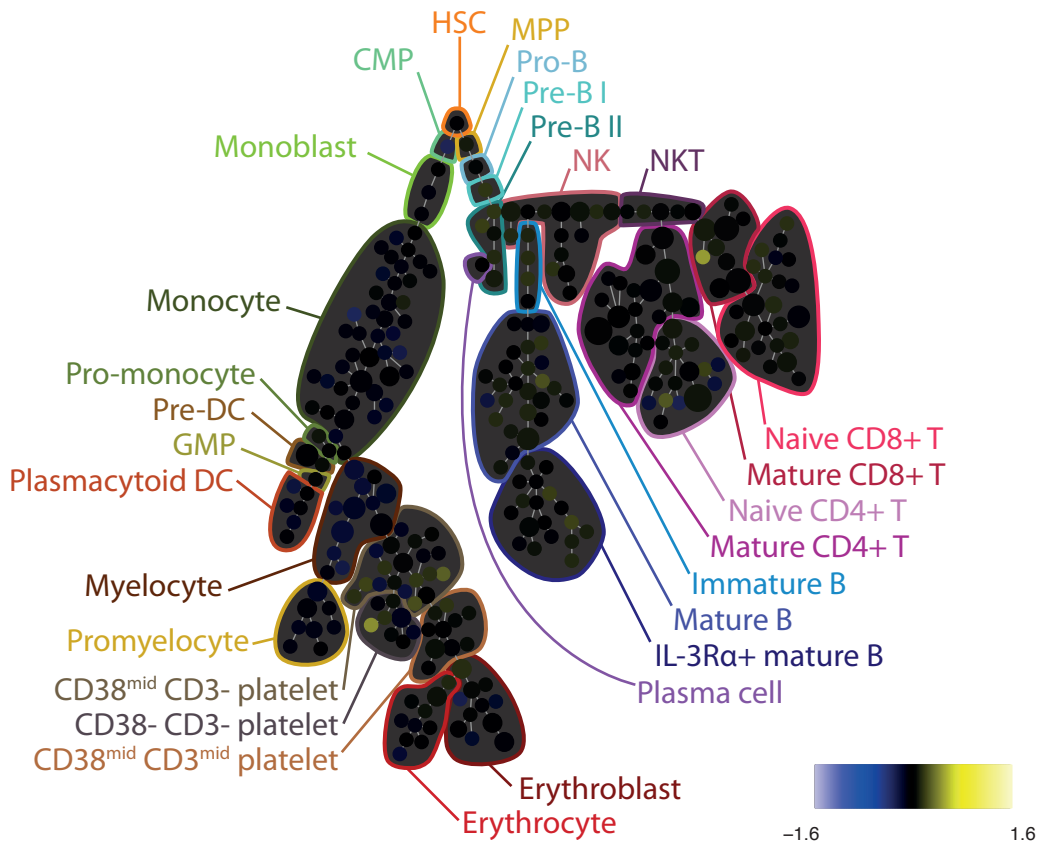

Figure S8A

159-pSTAT3 ---- GCSF vs Ref Ratio

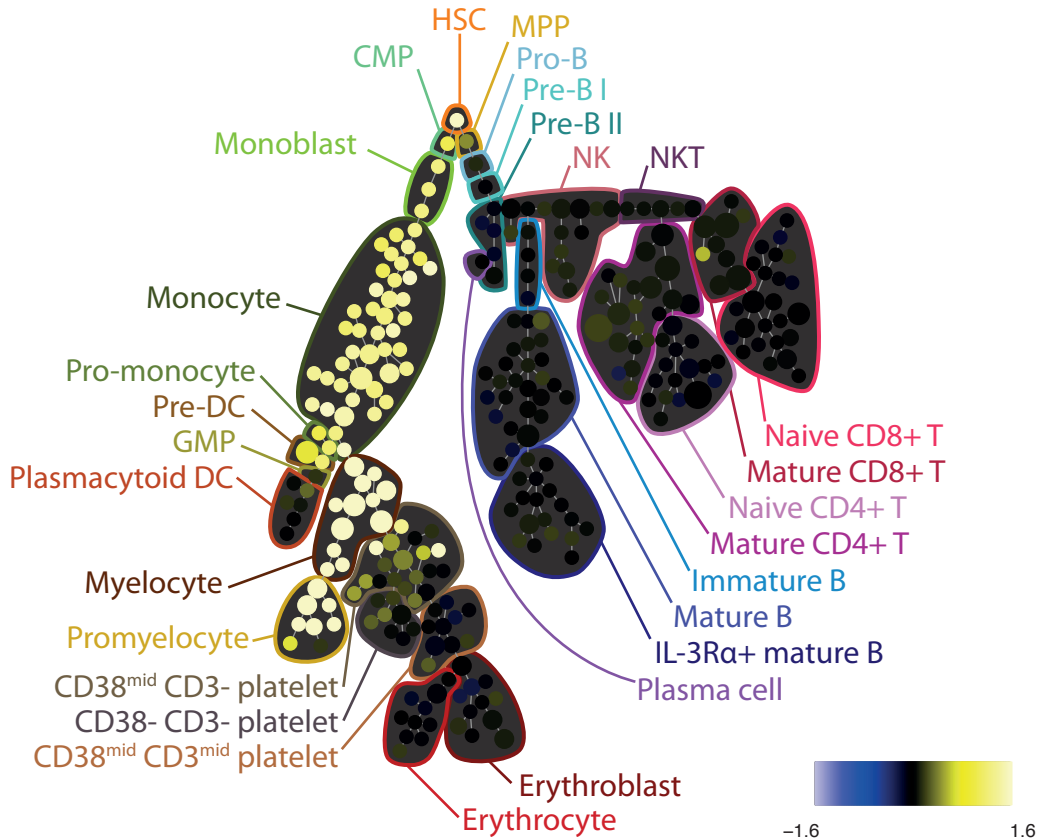

Figure S8A

159-pSTAT3 ---- GMCSF vs Ref Ratio

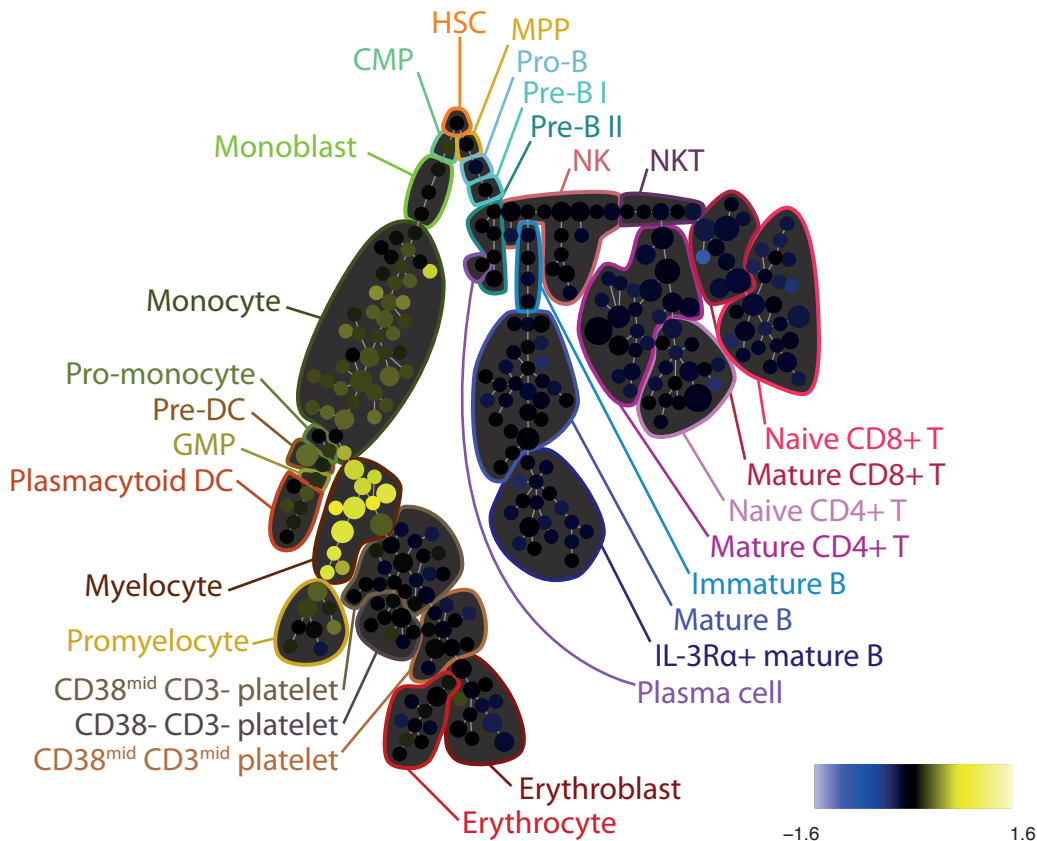

Figure S8A

159-pSTAT3 ---- IFNad vs Ref Ratio

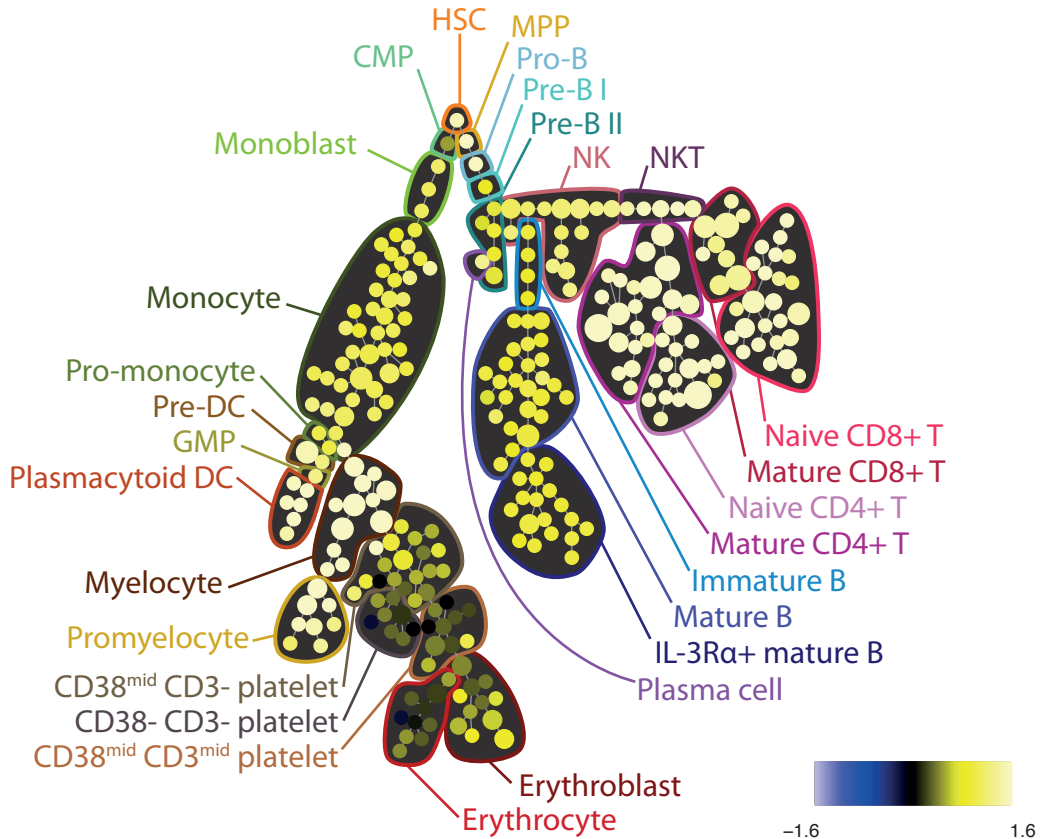



Figure S8A

159-pSTAT3 ---- IL3 vs Ref Ratio

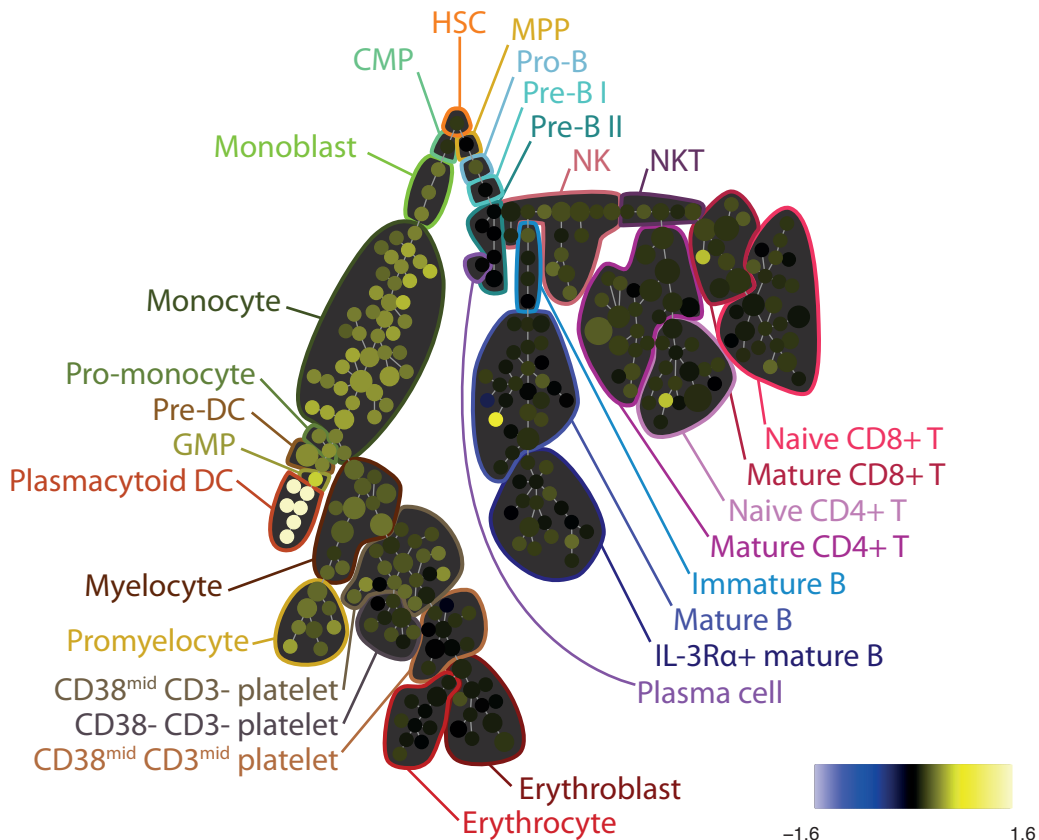

Figure S8A

159-pSTAT3 ---- IL7 vs Ref Ratio

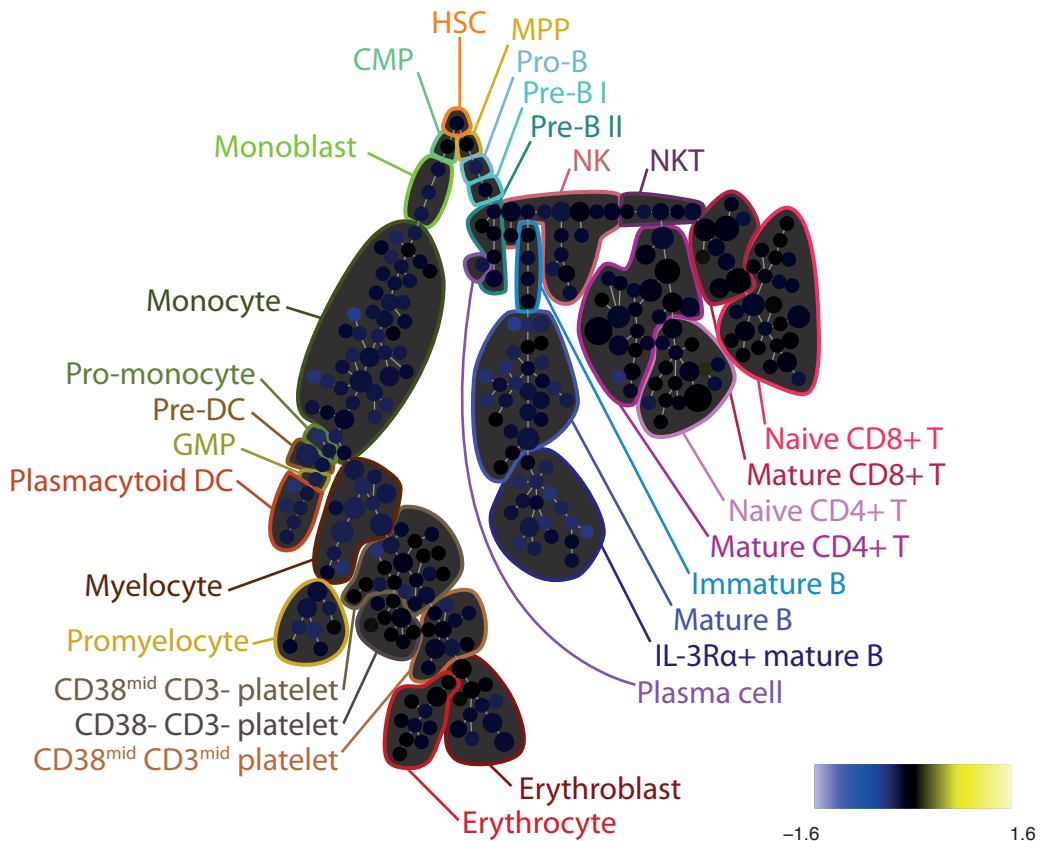

Figure S8A

159-pSTAT3 ---- LPS vs Ref Ratio

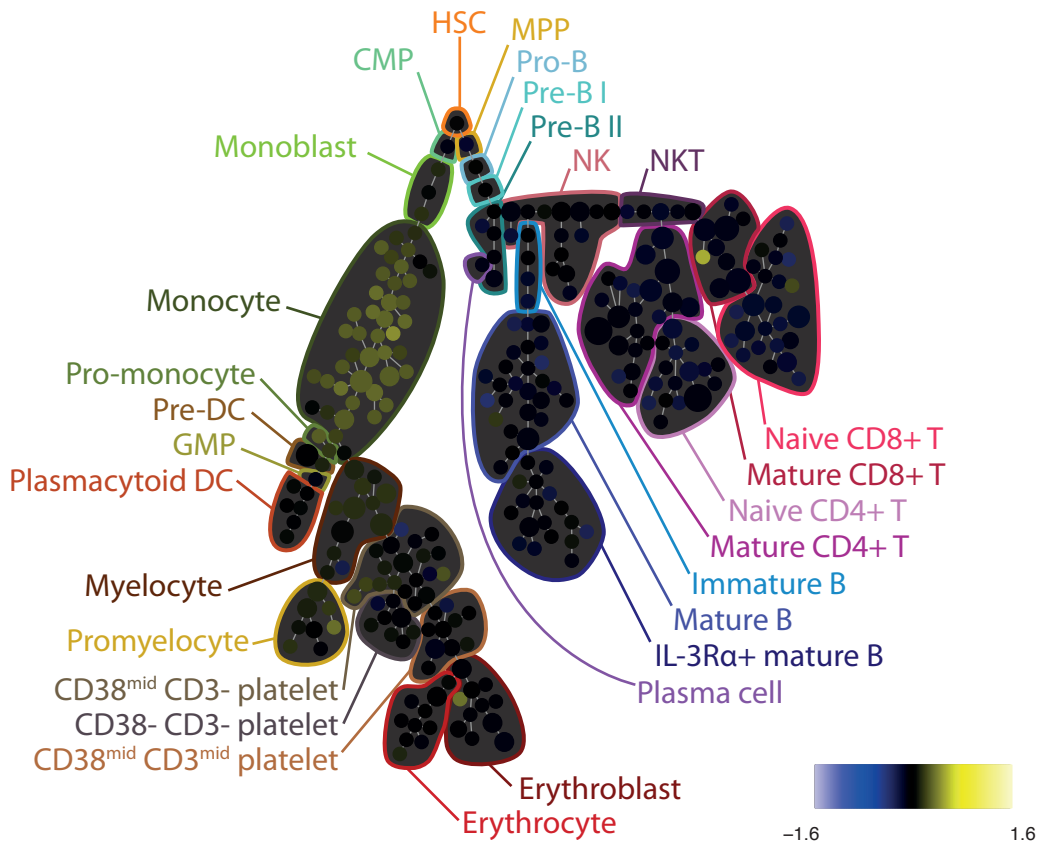

Figure S8A

159-pSTAT3 ---- PMAi on vs Ref Ratio

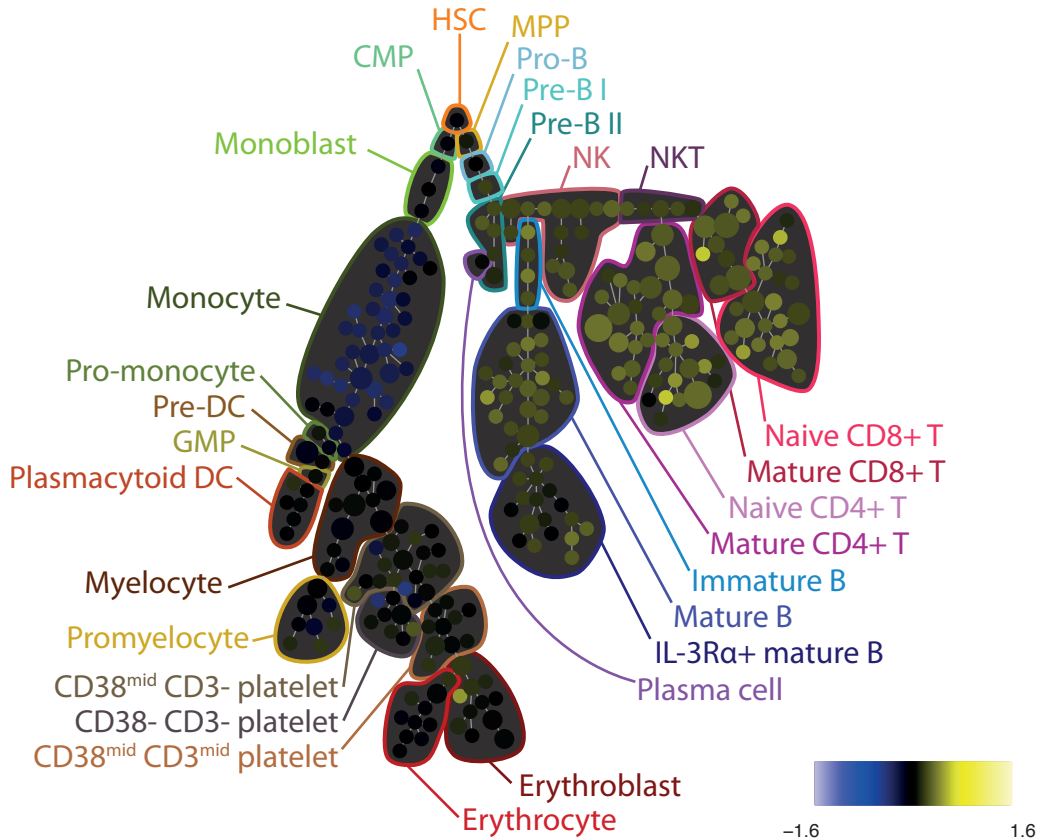

Figure S8A

159-pSTAT3 ---- PVO4 vs Ref Ratio

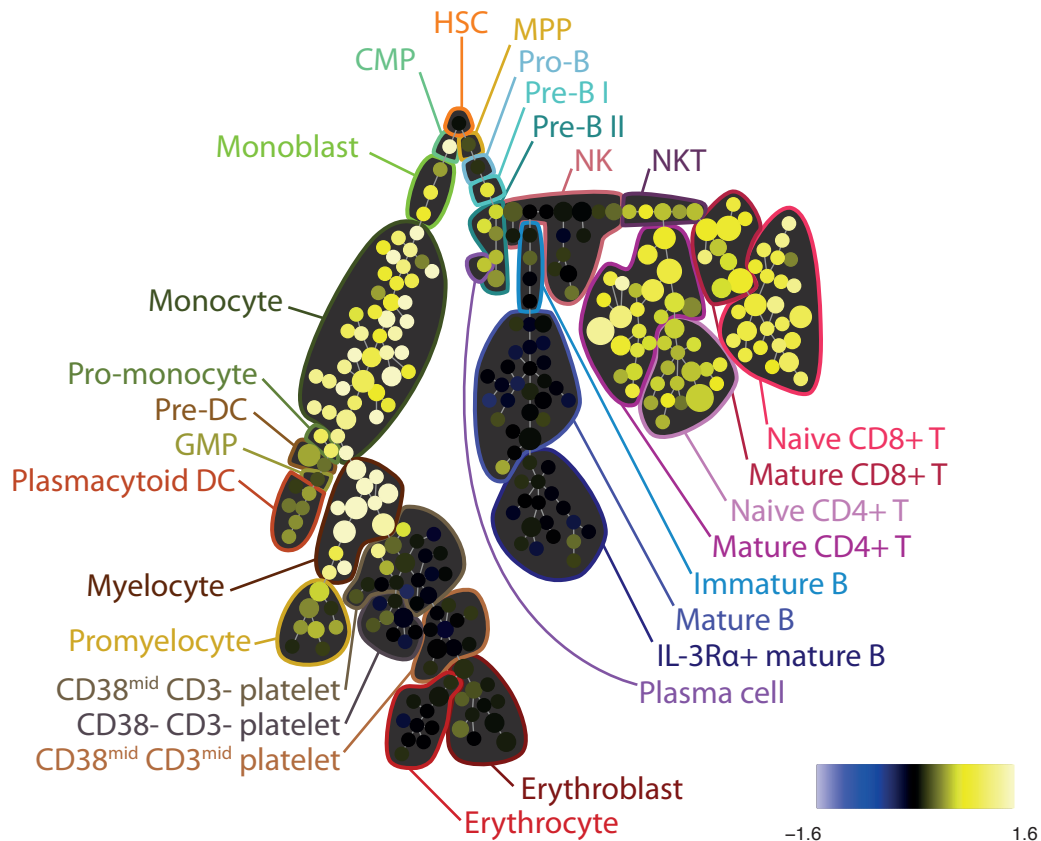

Figure S8A

159-pSTAT3 — SCF vs Ref Ratio

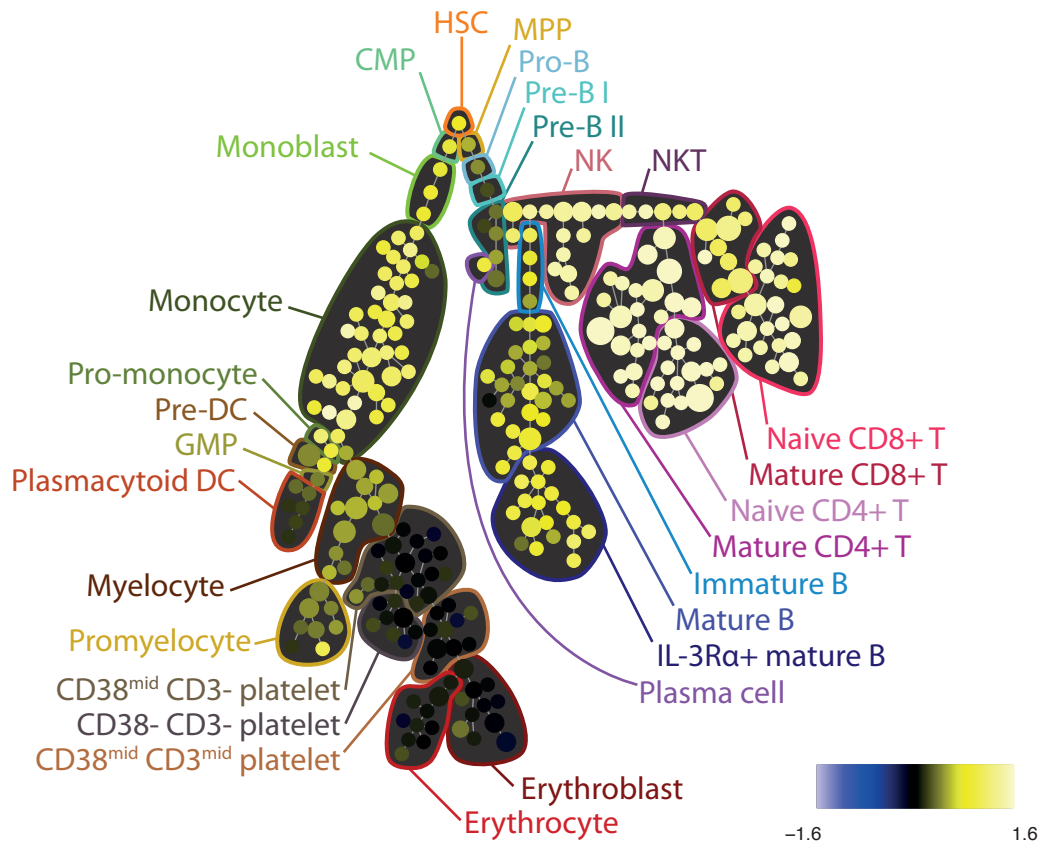

Figure S8A

159-pSTAT3 ---- TNFa vs Ref Ratio

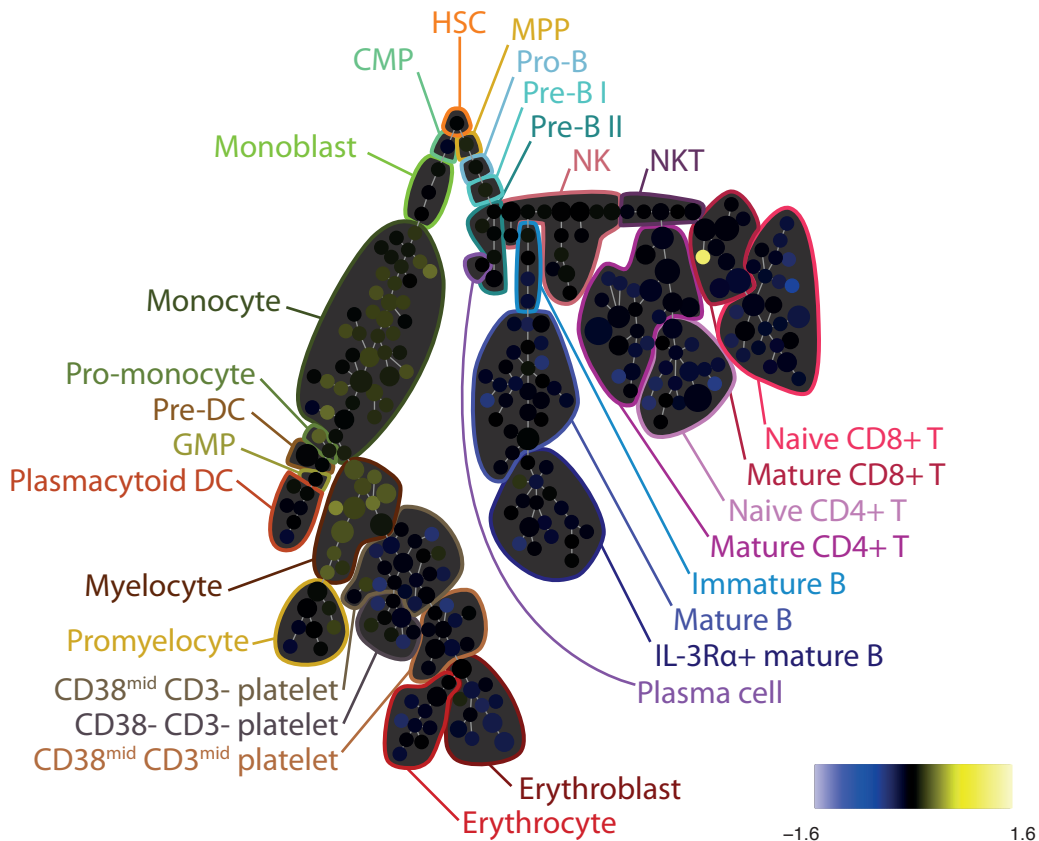

Figure S8A

159-pSTAT3 ---- TPO vs Ref Ratio

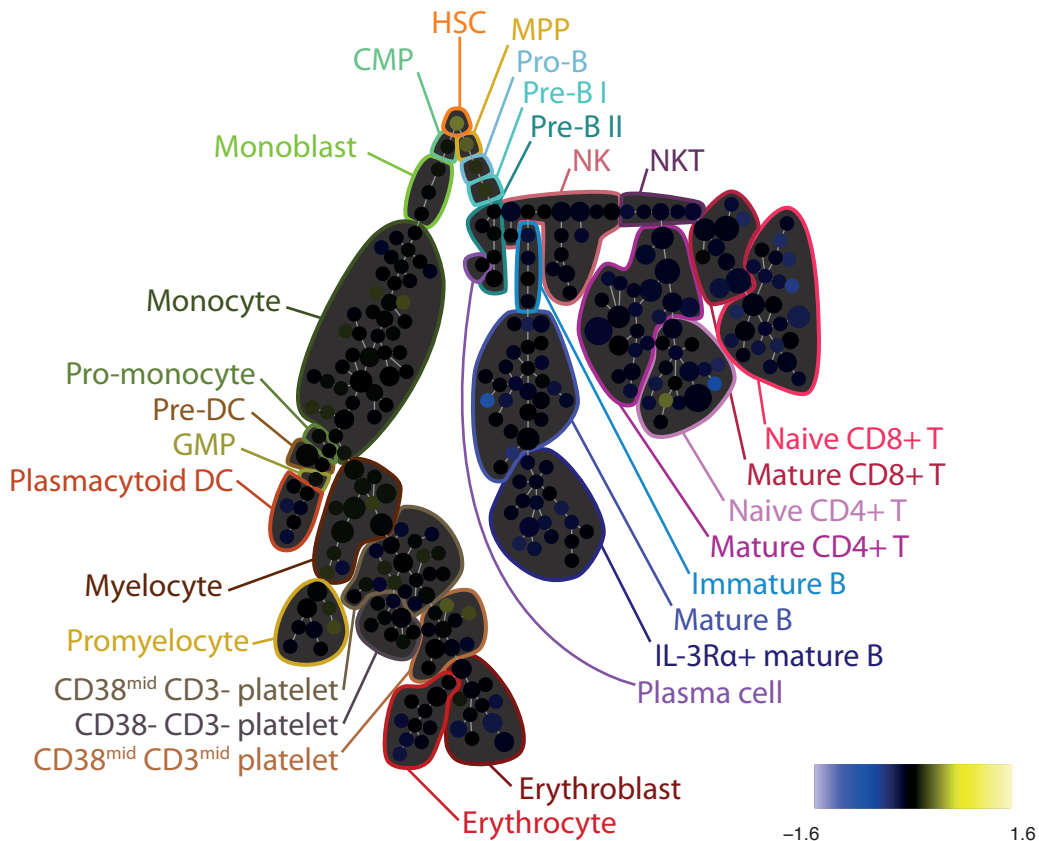



Figure S8A

164-pSLP-76 ---- BCR vs Ref Ratio

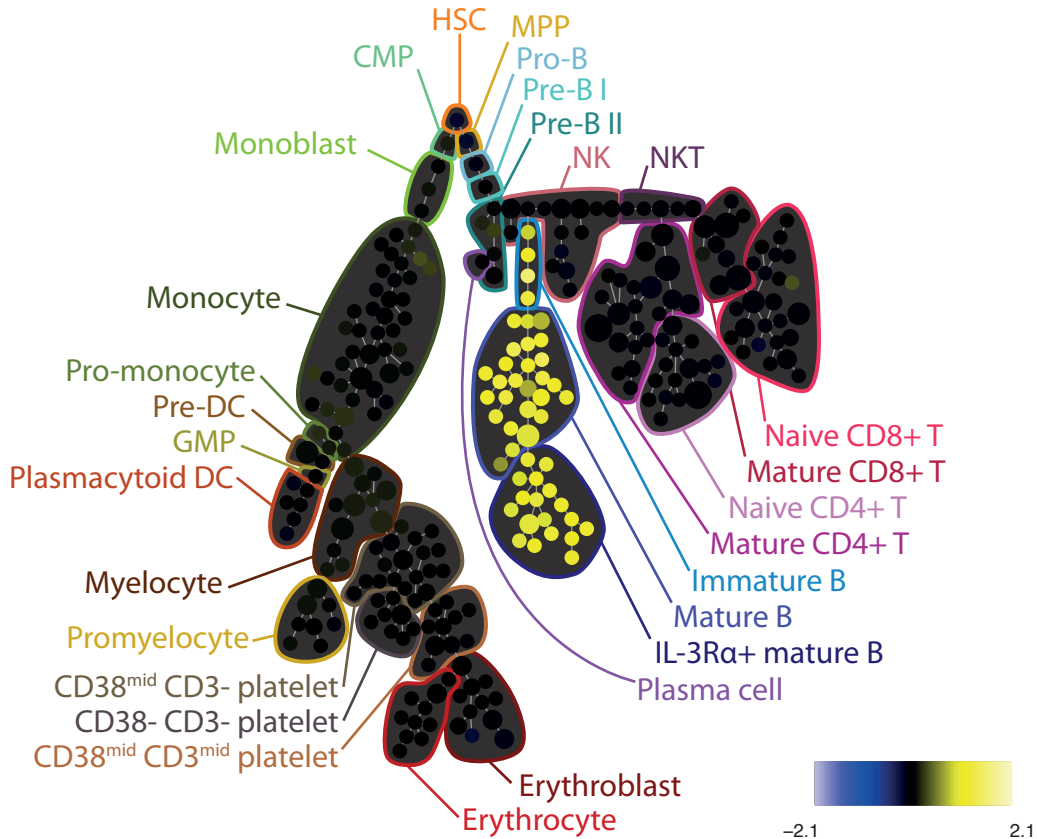

Figure S8A

164-pSLP-76 --- DMSO vs Ref Ratio

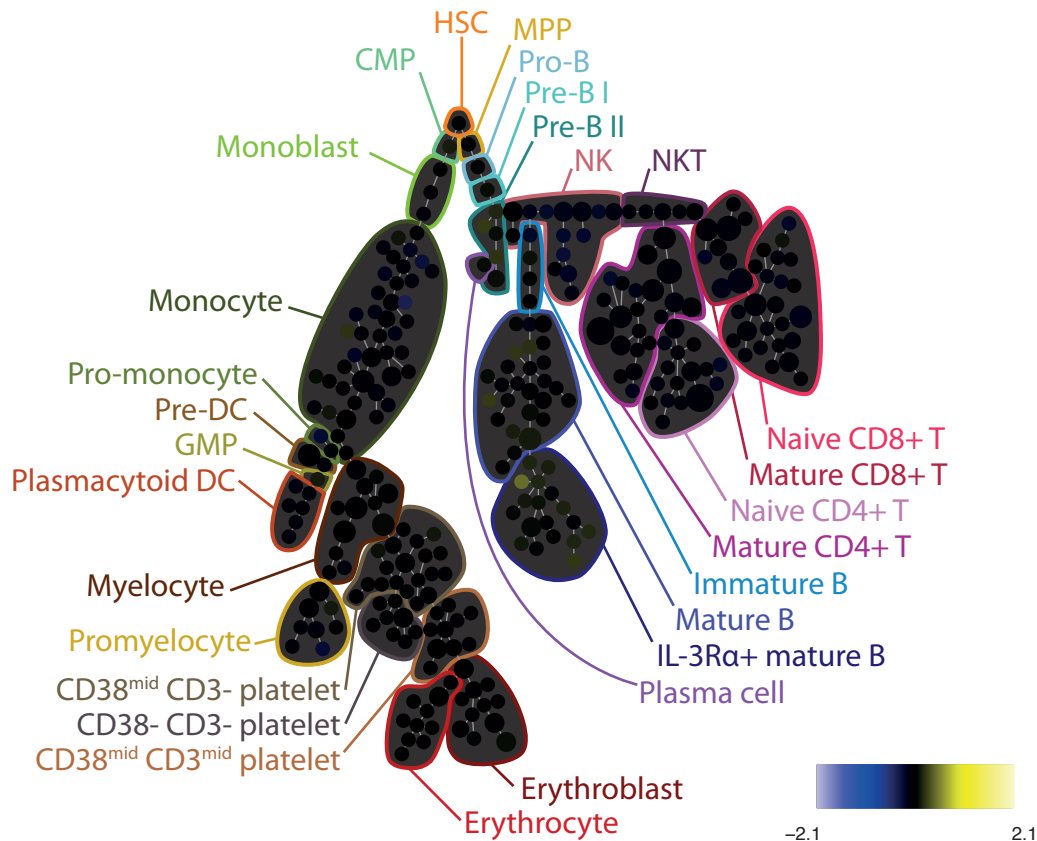

Figure S8A

164-pSLP-76 ---- Flt3L vs Ref Ratio

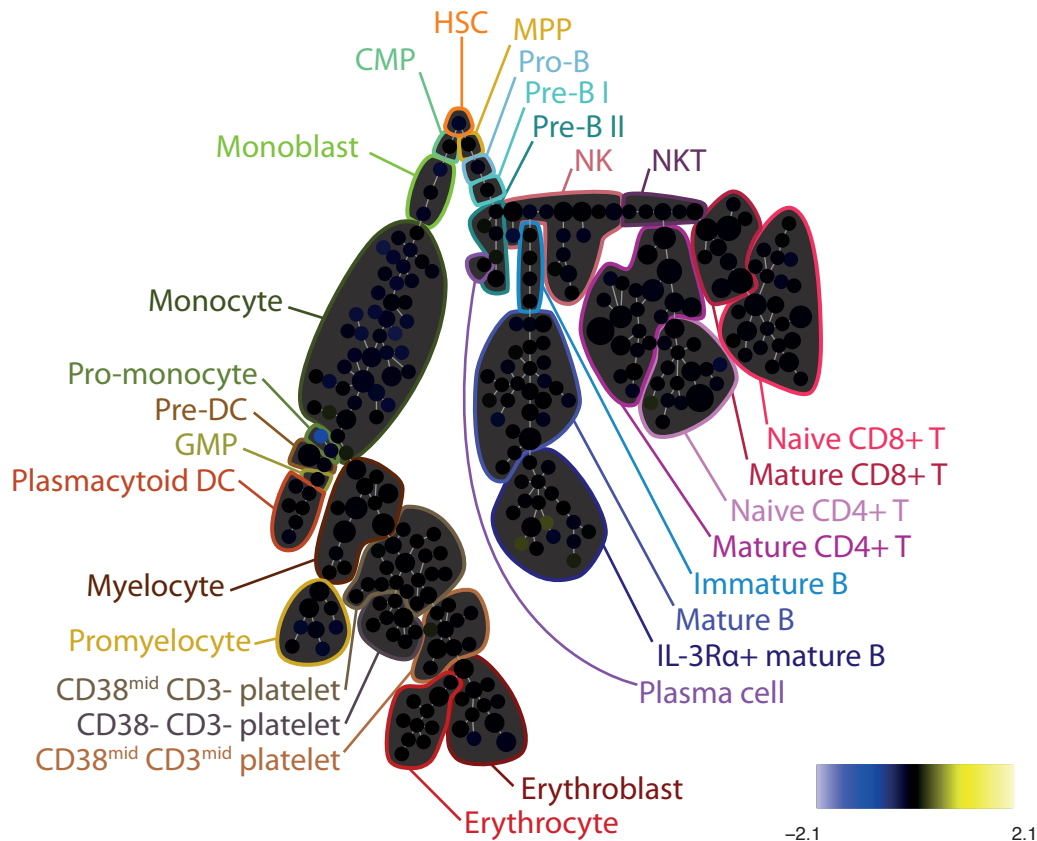

Figure S8A

164-pSLP-76 ---- GCSF vs Ref Ratio

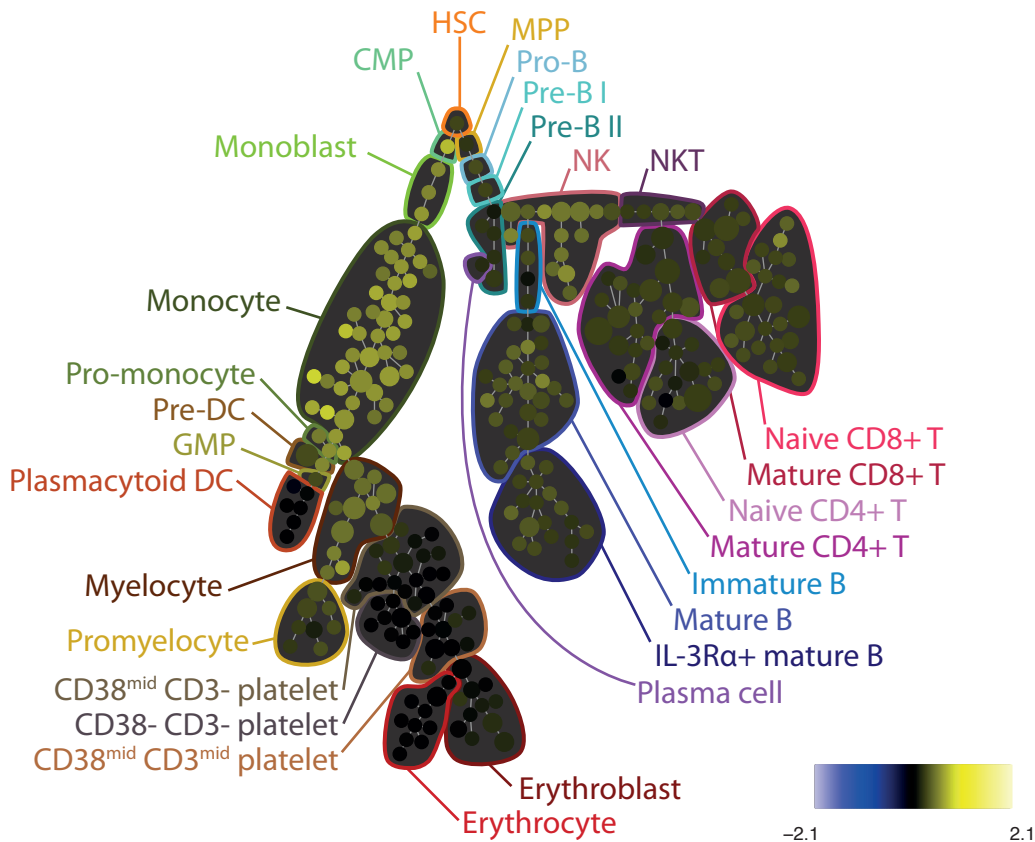

Figure S8A

164-pSLP-76 ---- GMCSF vs Ref Ratio

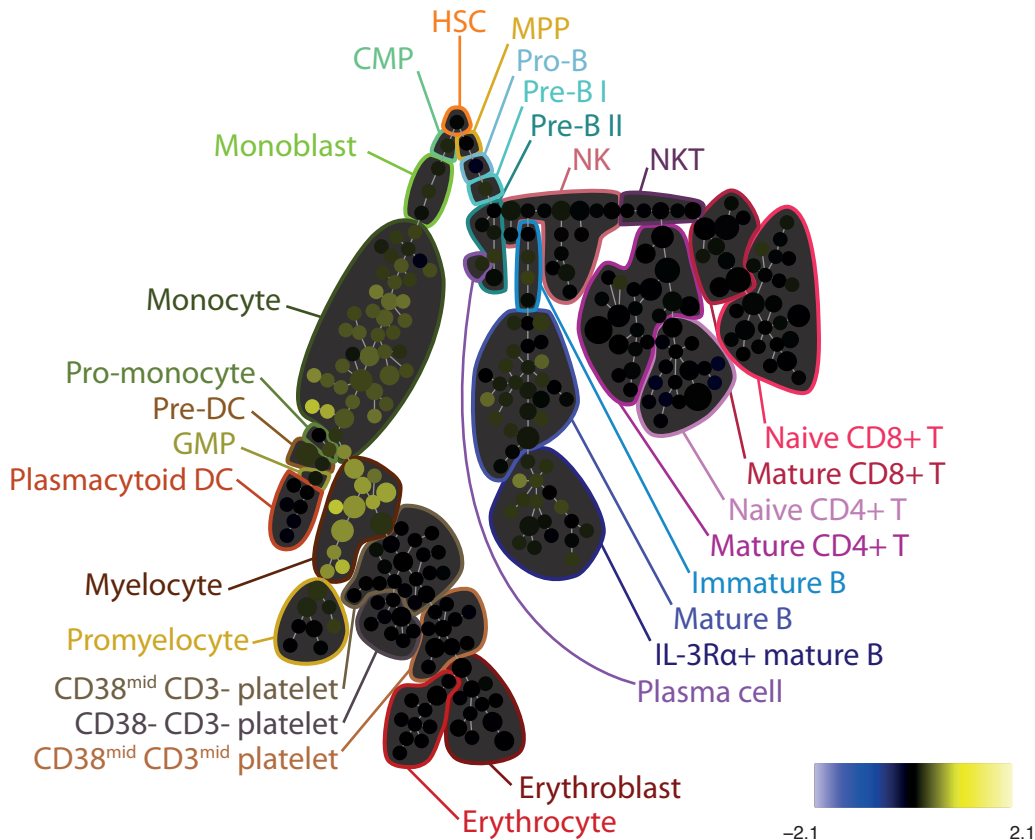

Figure S8A

164-pSLP-76 ---- IFNad vs Ref Ratio

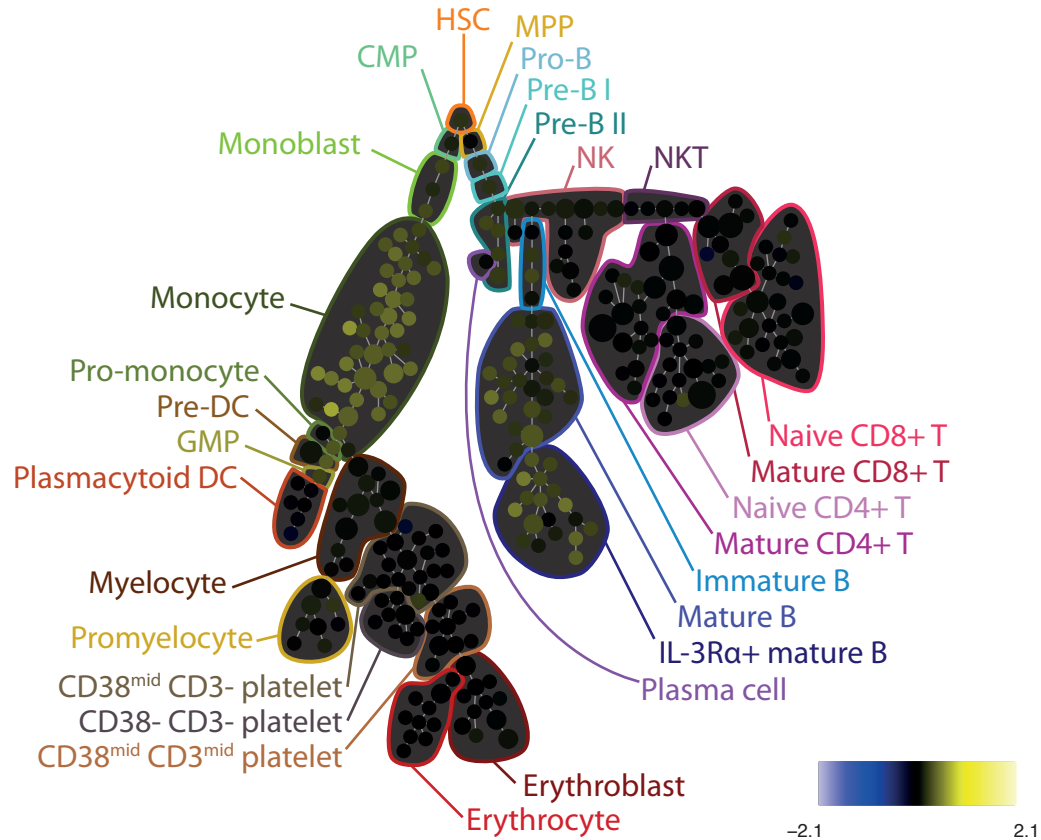

Figure S8A

164-pSLP-76 ---- IL3 vs Ref Ratio

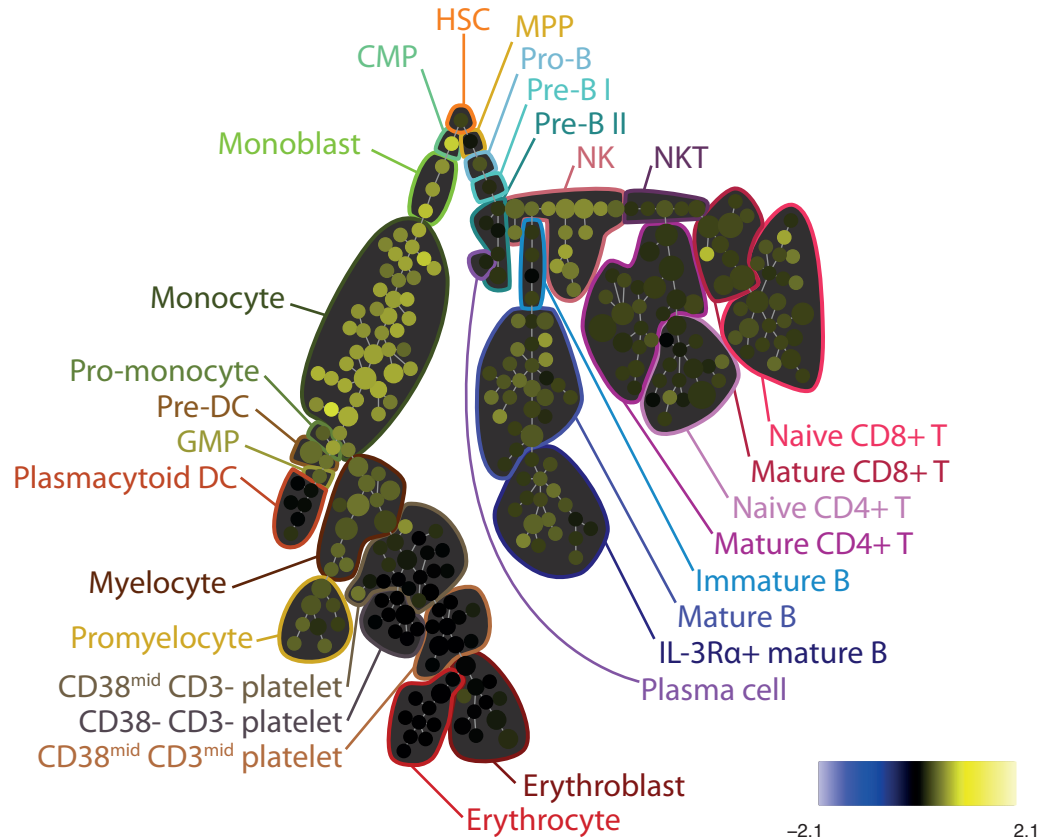

Figure S8A

164-pSLP-76 ---- IL7 vs Ref Ratio

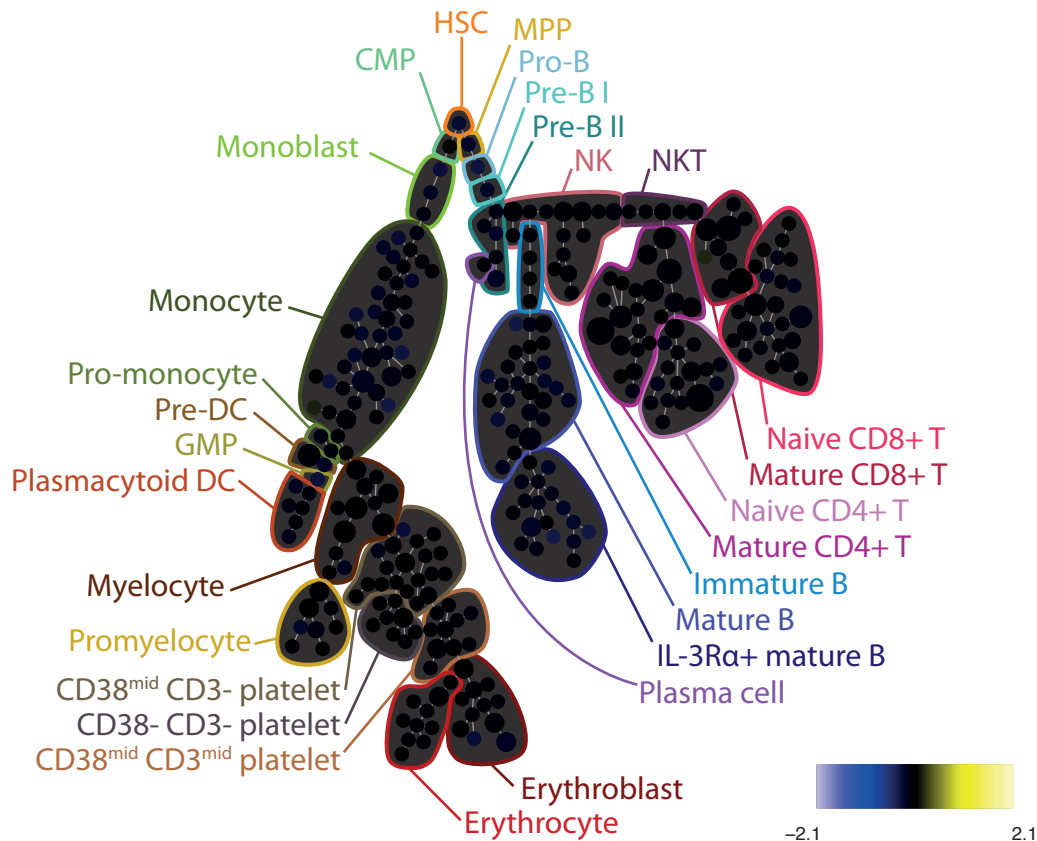



Figure S8A

164-pSLP-76 --- LPS vs Ref Ratio

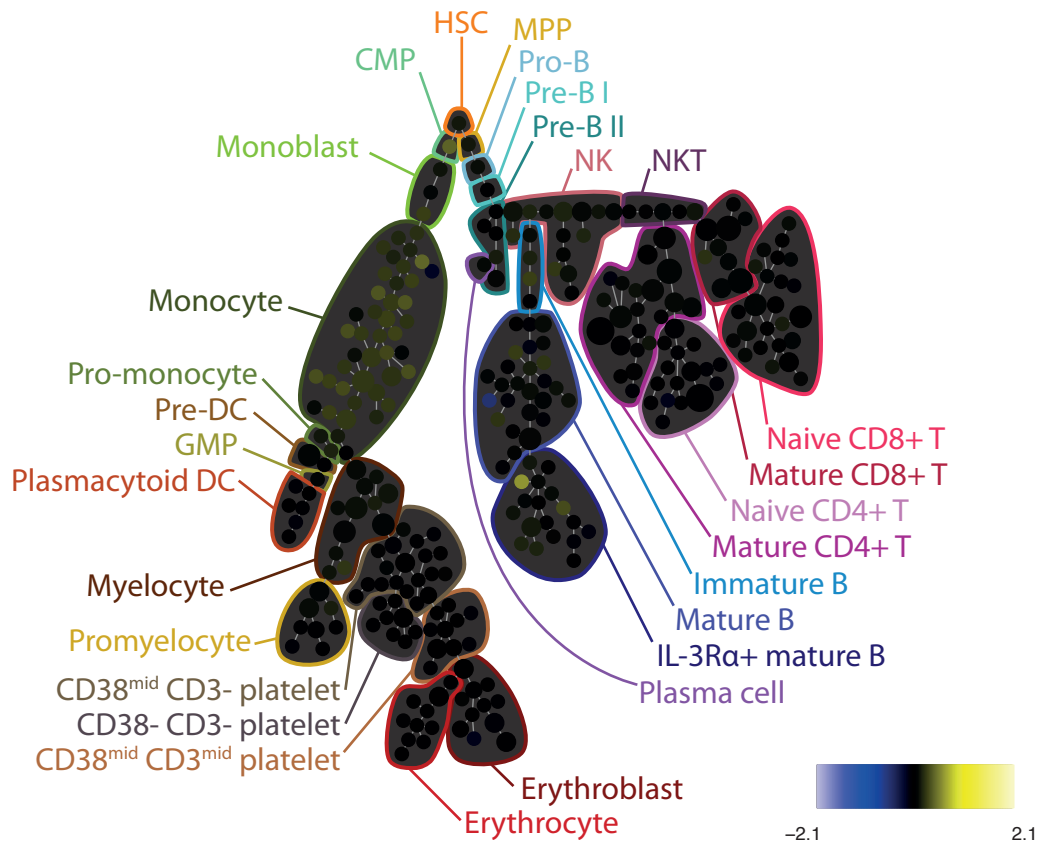

Figure S8A

164-pSLP-76 ---- PMAiono vs Ref Ratio

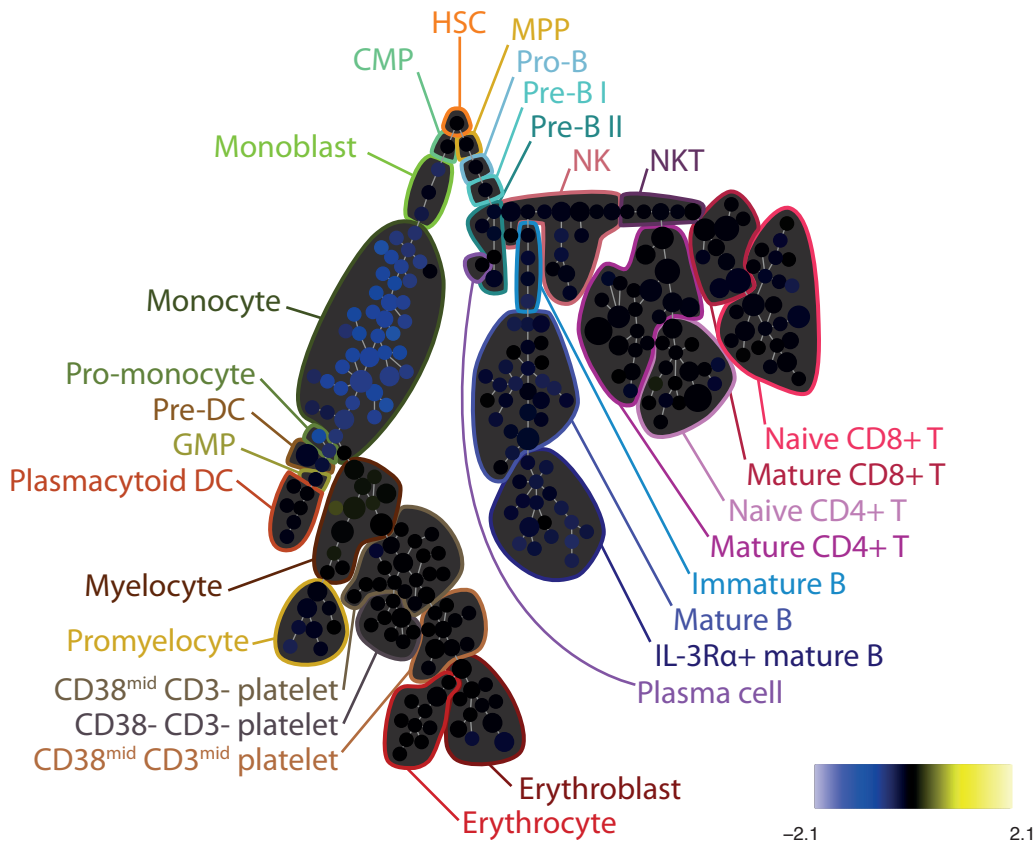

Figure S8A

164-pSLP-76 ---- PVO4 vs Ref Ratio

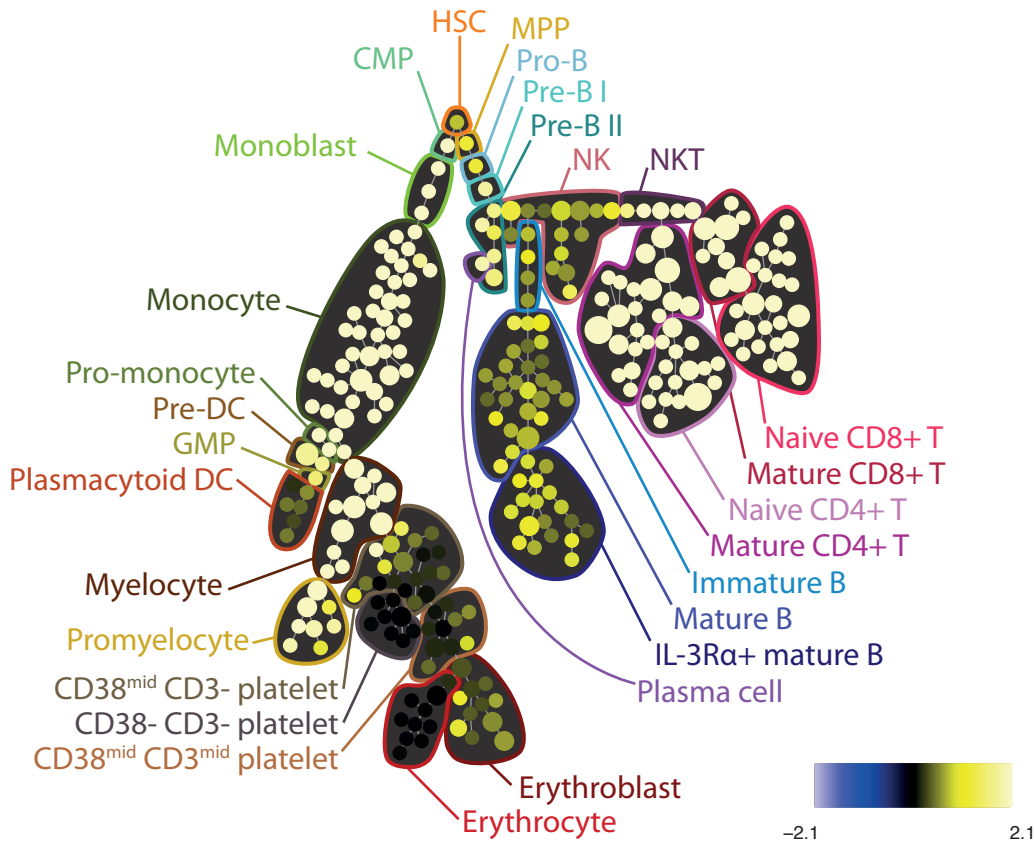

Figure S8A

164-pSLP-76 ---- SCF vs Ref Ratio

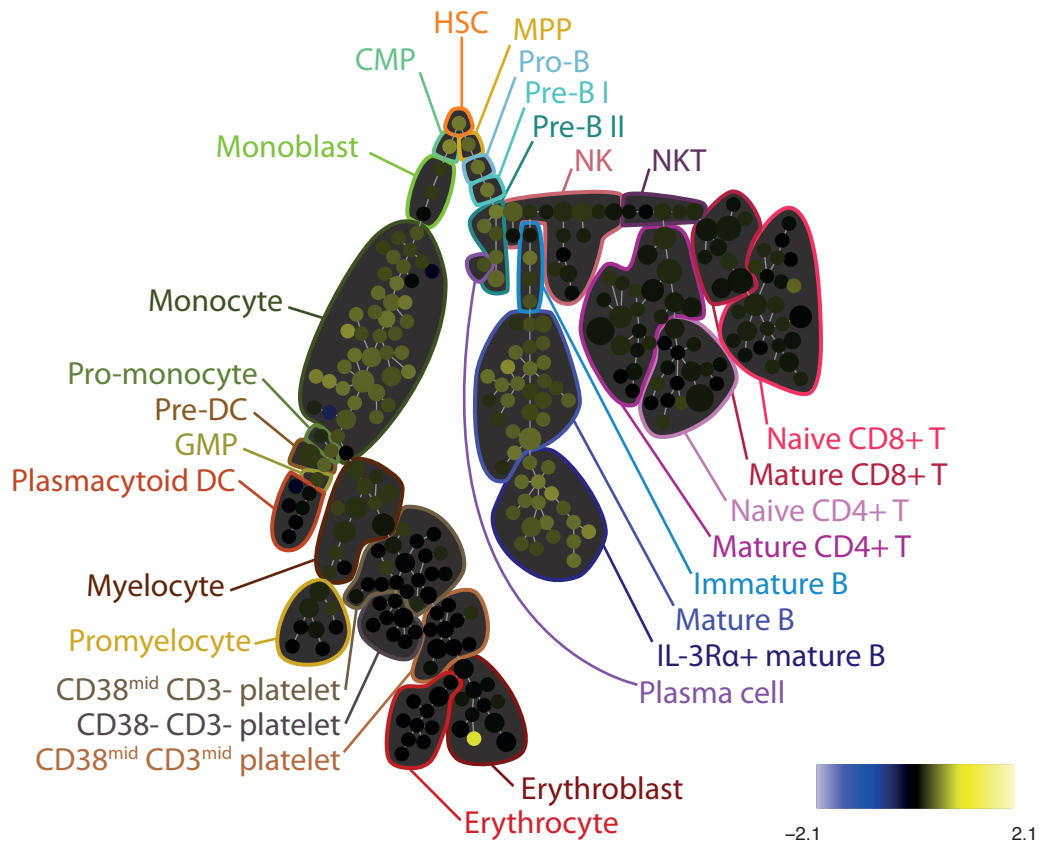

Figure S8A

164-pSLP-76 ---- TNFa vs Ref Ratio

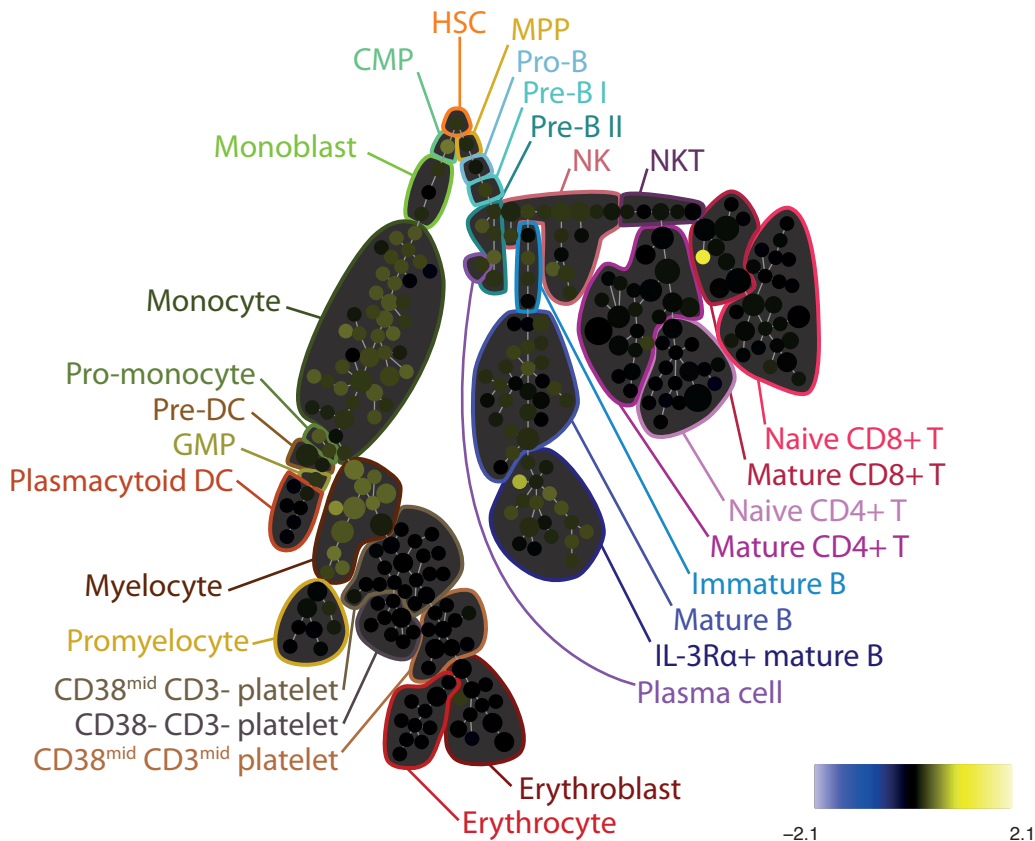

Figure S8A

164-pSLP-76 ---- TPO vs Ref Ratio

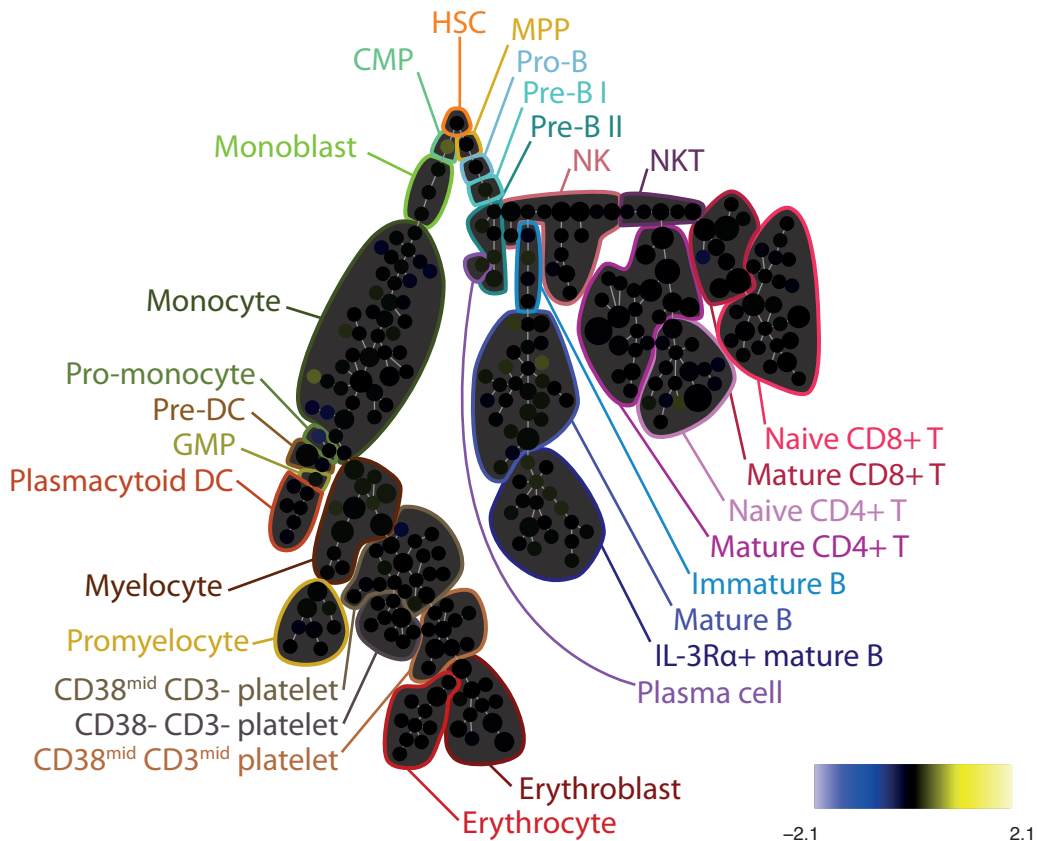

Figure S8A

165-pNFkB ---- BCR vs Ref Ratio

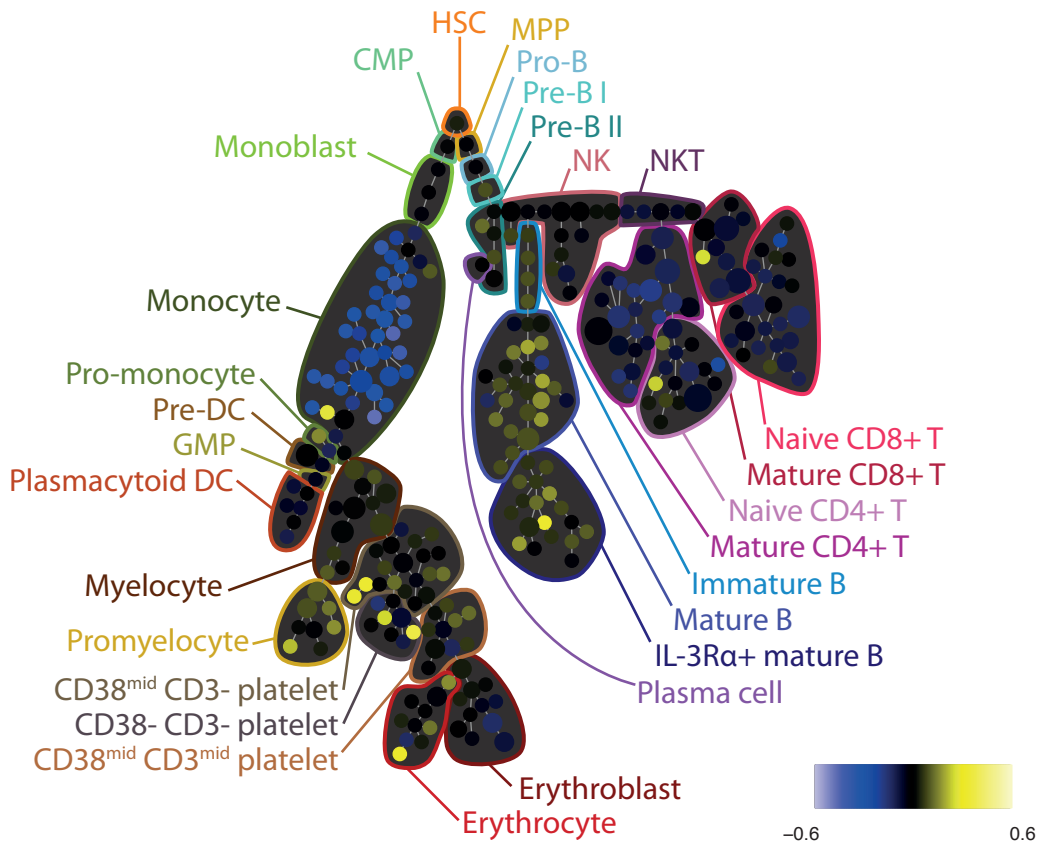

Figure S8A

165-pNFkB ---- DMSO vs Ref Ratio

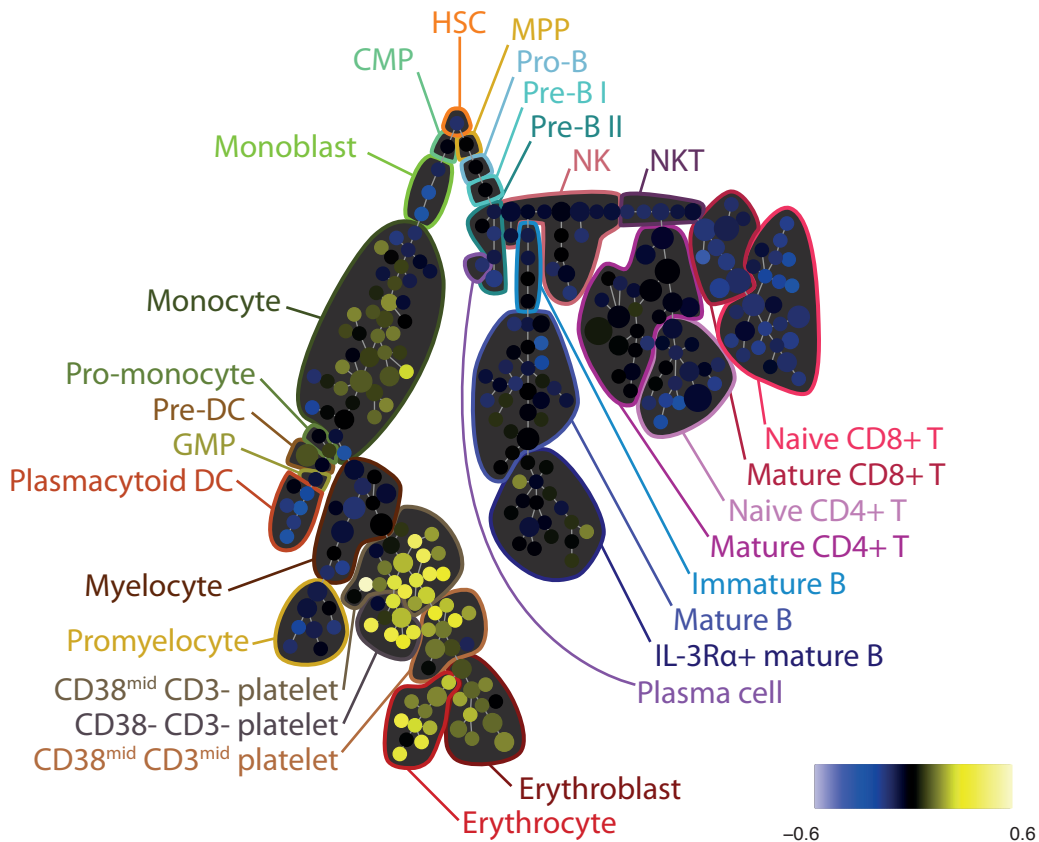



Figure S8A

165-pNFkB ---- Flt3L vs Ref Ratio

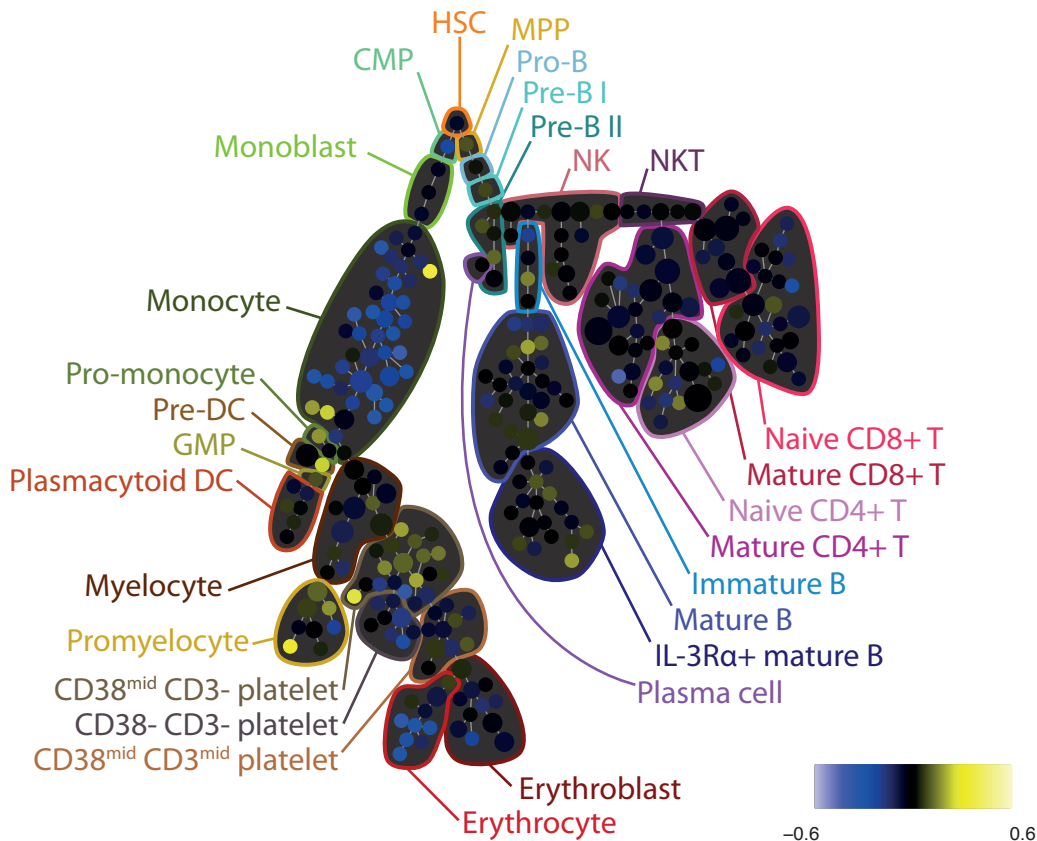

Figure S8A

165-pNFkB ---- GCSF vs Ref Ratio

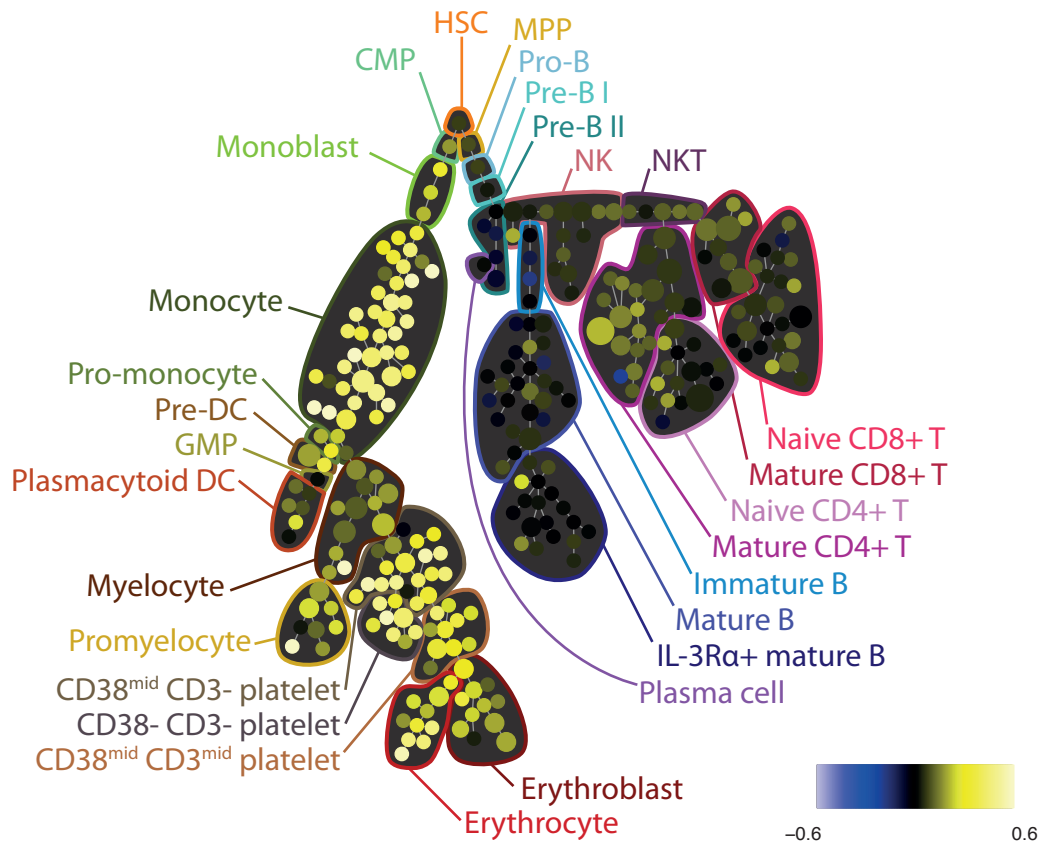

Figure S8A

165-pNFkB ---- GMCSF vs Ref Ratio

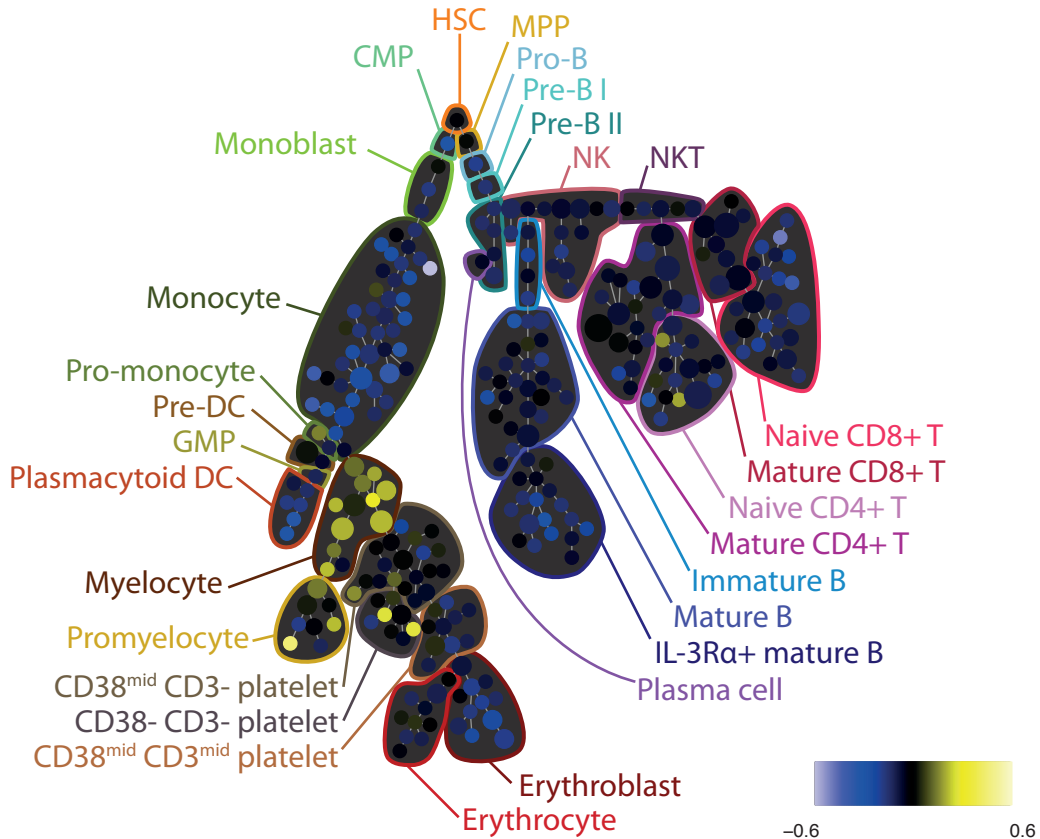

Figure S8A

165-pNFkB ---- IFNad vs Ref Ratio

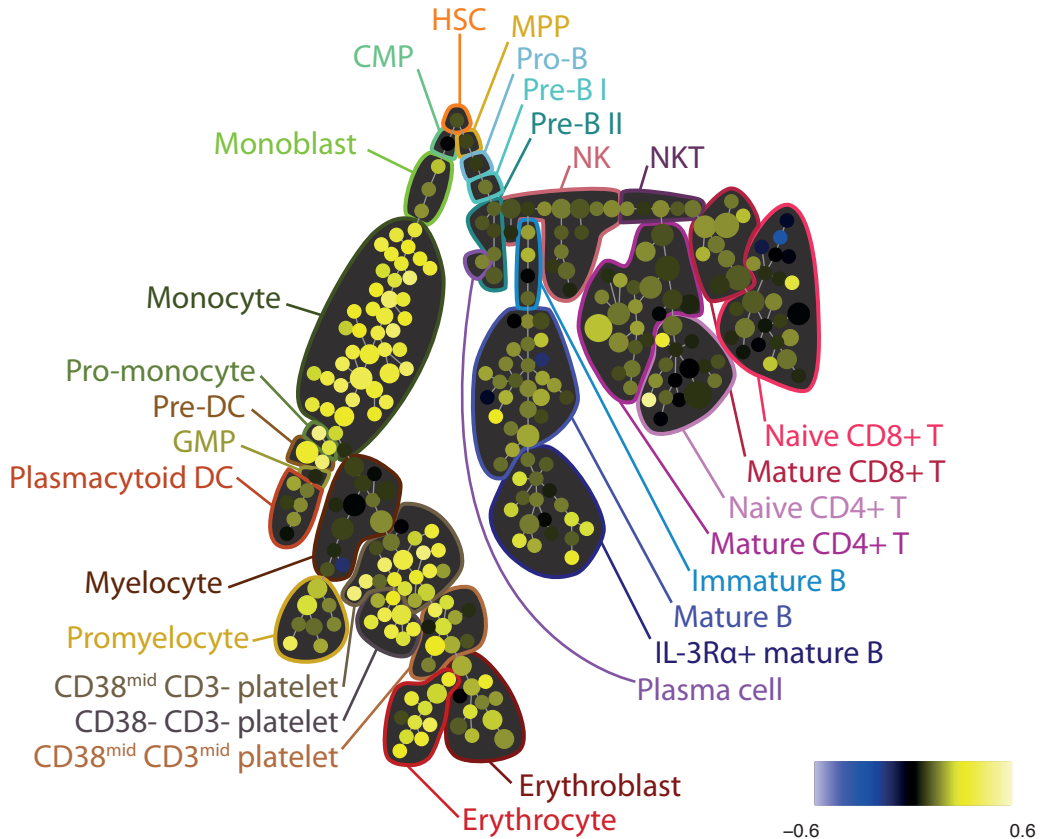

Figure S8A

165-pNFkB ---- IL3 vs Ref Ratio

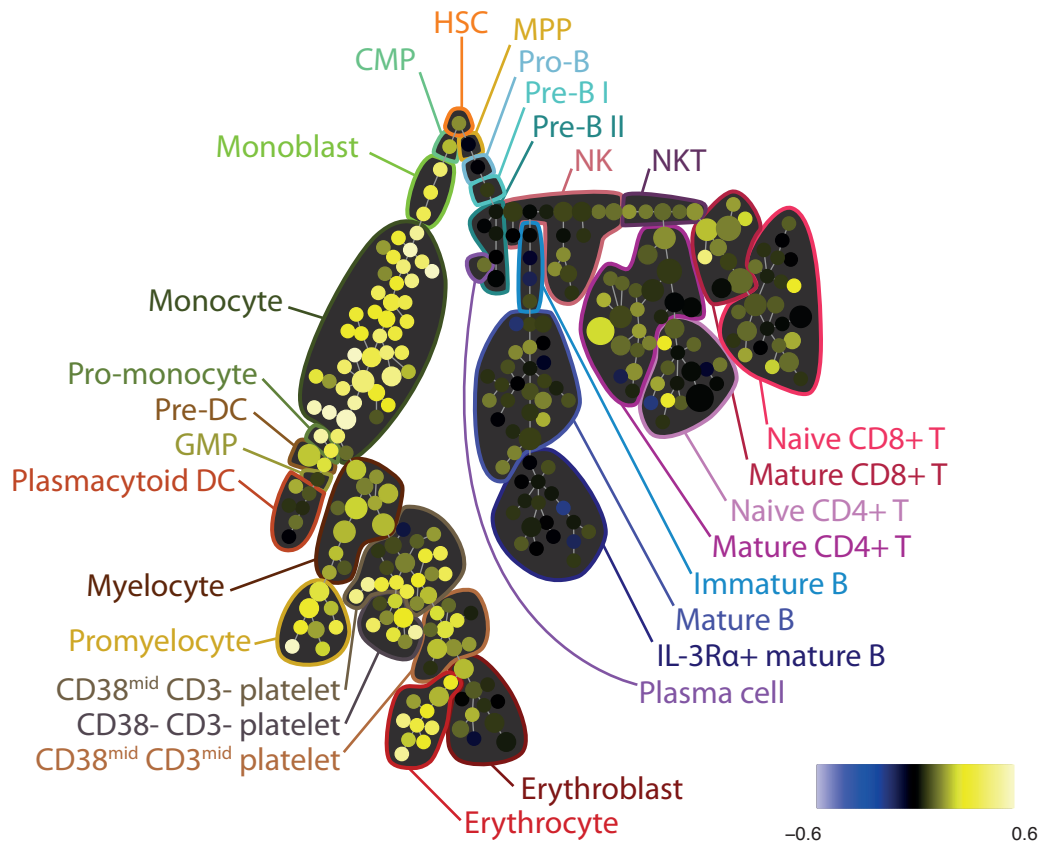

Figure S8A

165-pNFkB ---- IL7 vs Ref Ratio

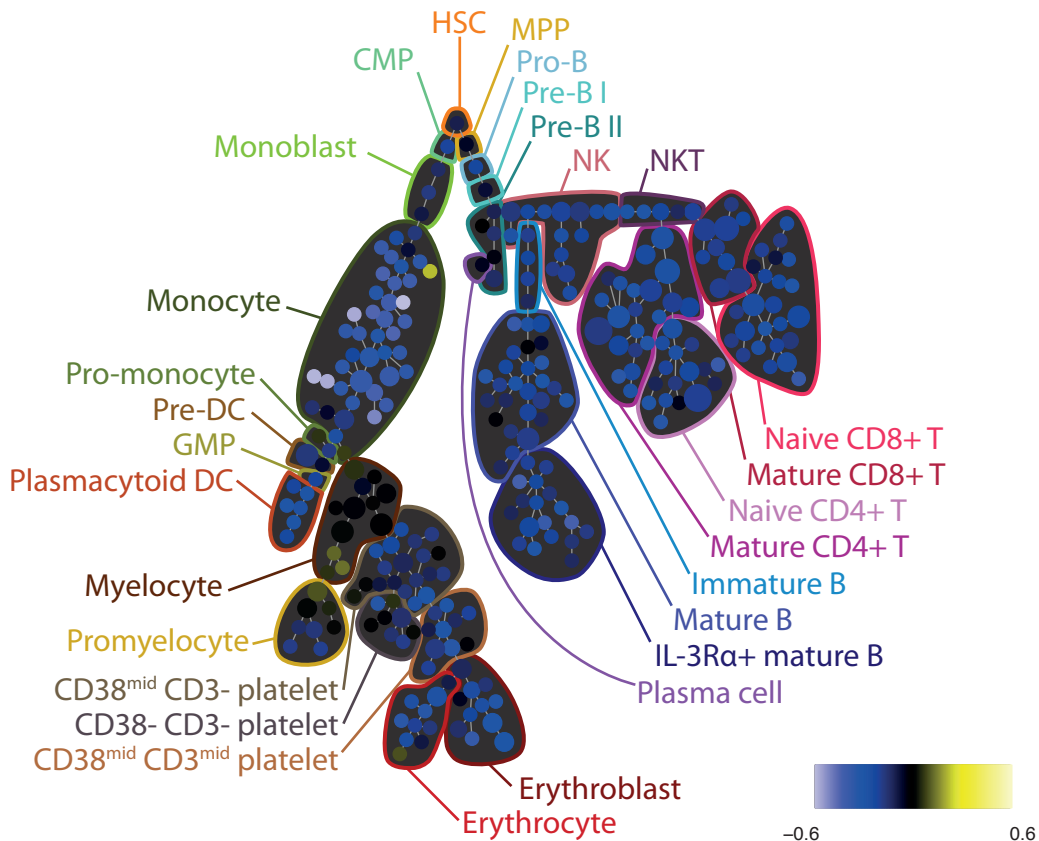

Figure S8A

165-pNFkB --- LPS vs Ref Ratio

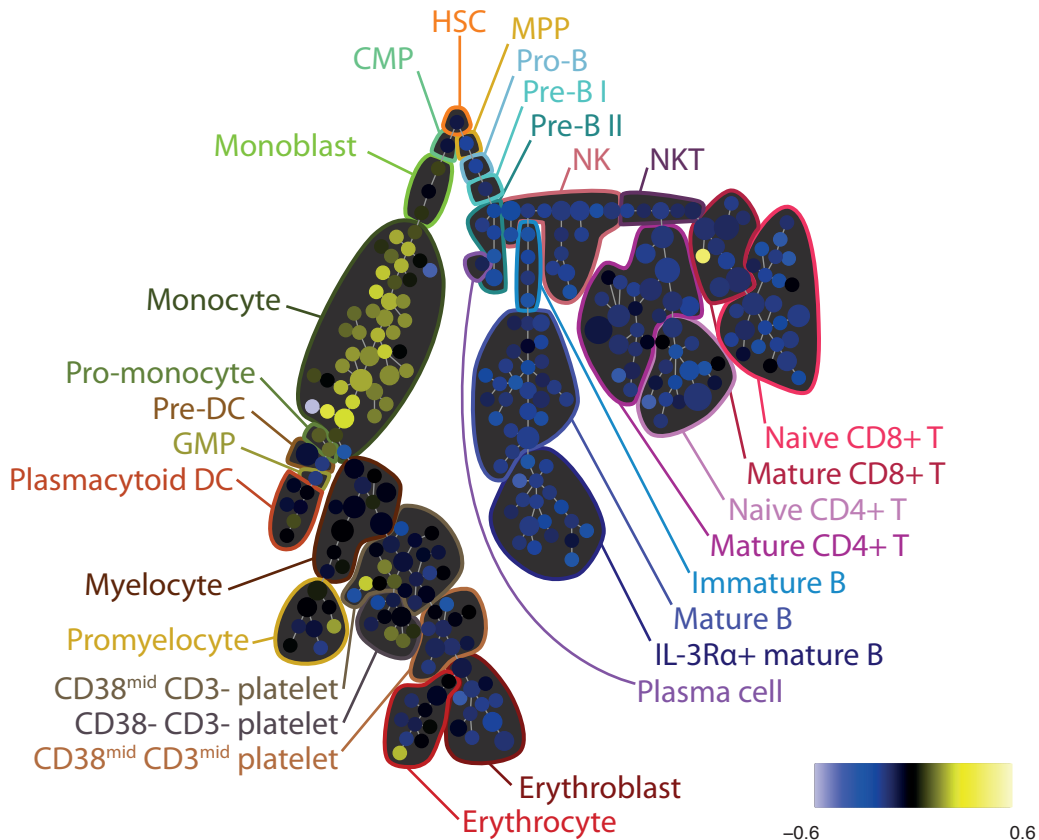

Figure S8A

165-pNFkB ---- PMAiono vs Ref Ratio

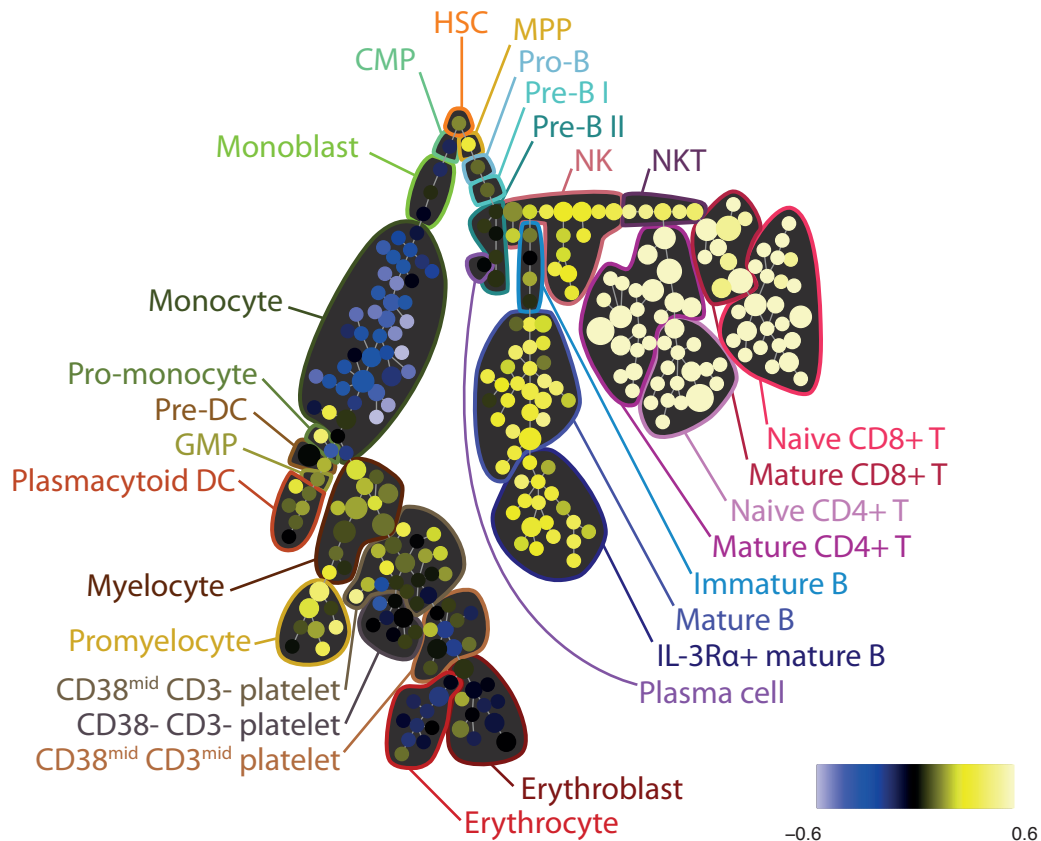



Figure S8A

165-pNFkB ---- PVO4 vs Ref Ratio

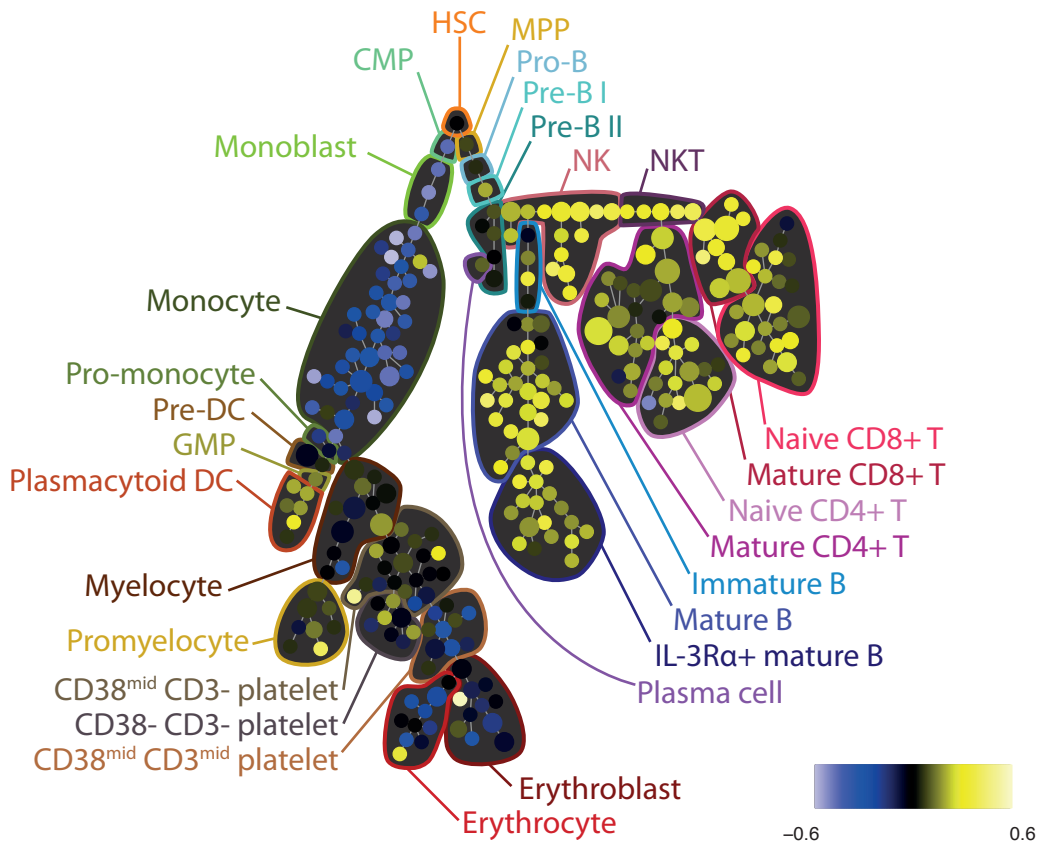

Figure S8A

165-pNFkB ---- SCF vs Ref Ratio

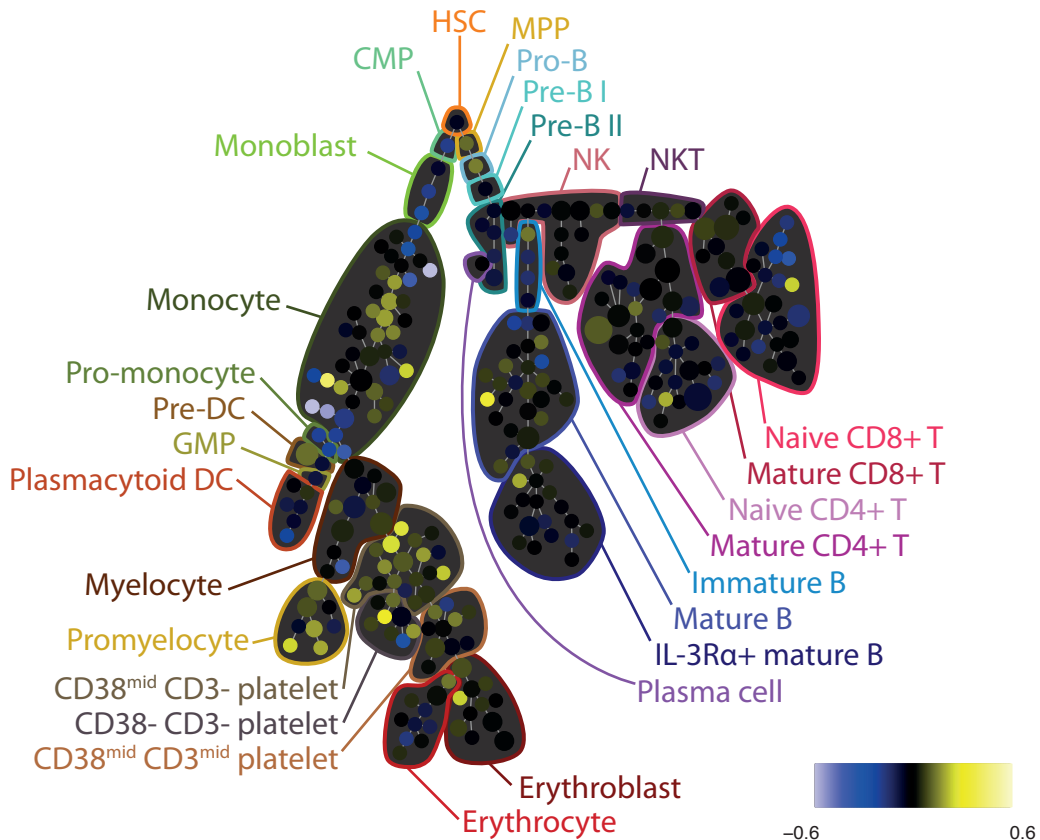

Figure S8A

165-pNFkB ---- TNFa vs Ref Ratio

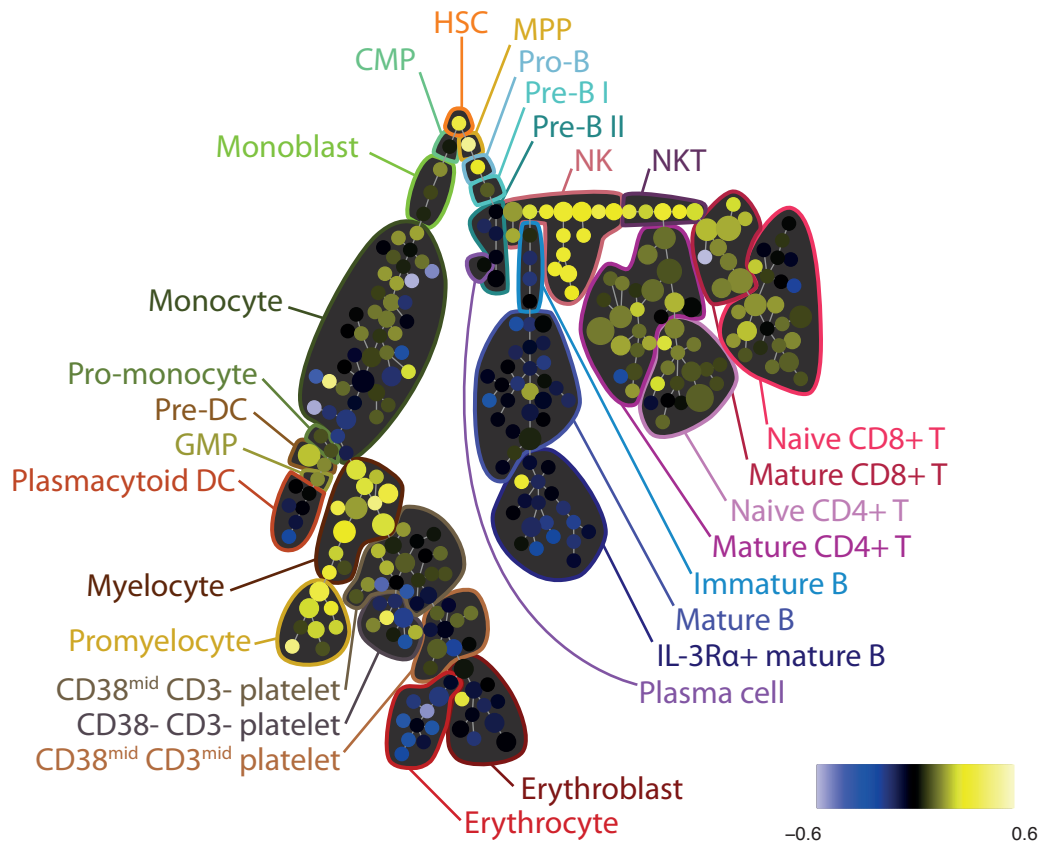

Figure S8A

165-pNFkB ---- TPO vs Ref Ratio

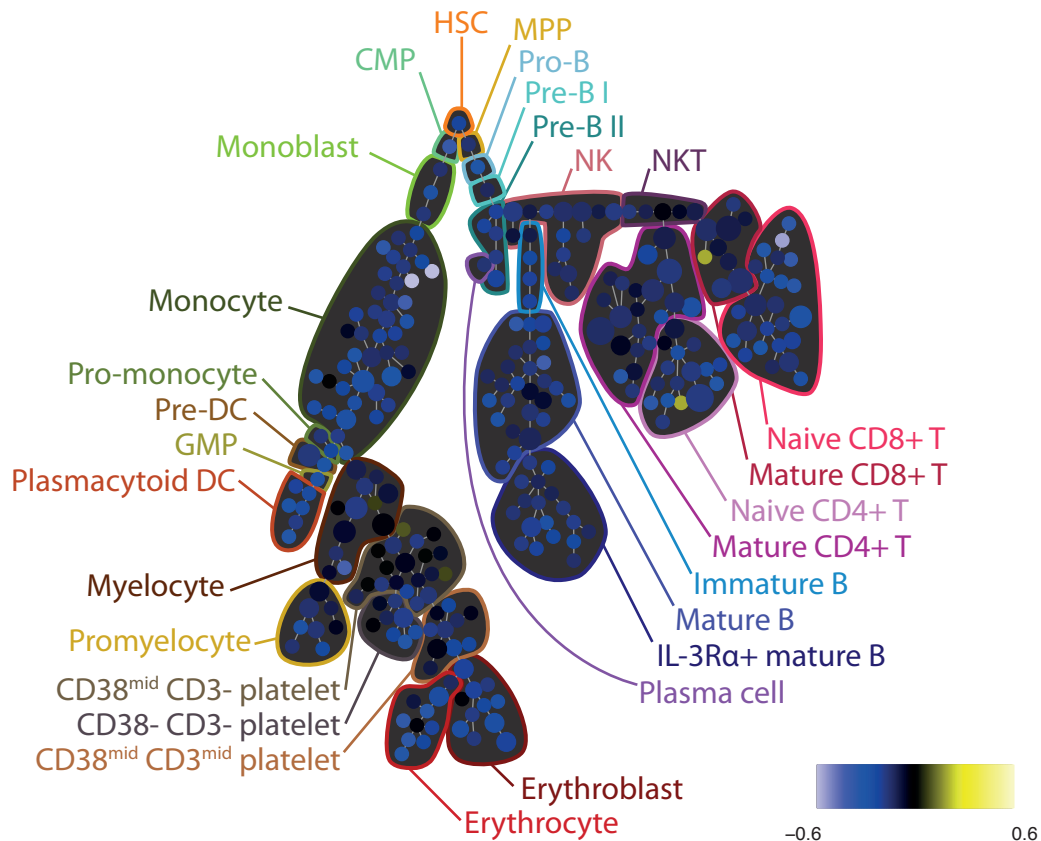

Figure S8A

166-IkBalpha ---- BCR vs Ref Ratio

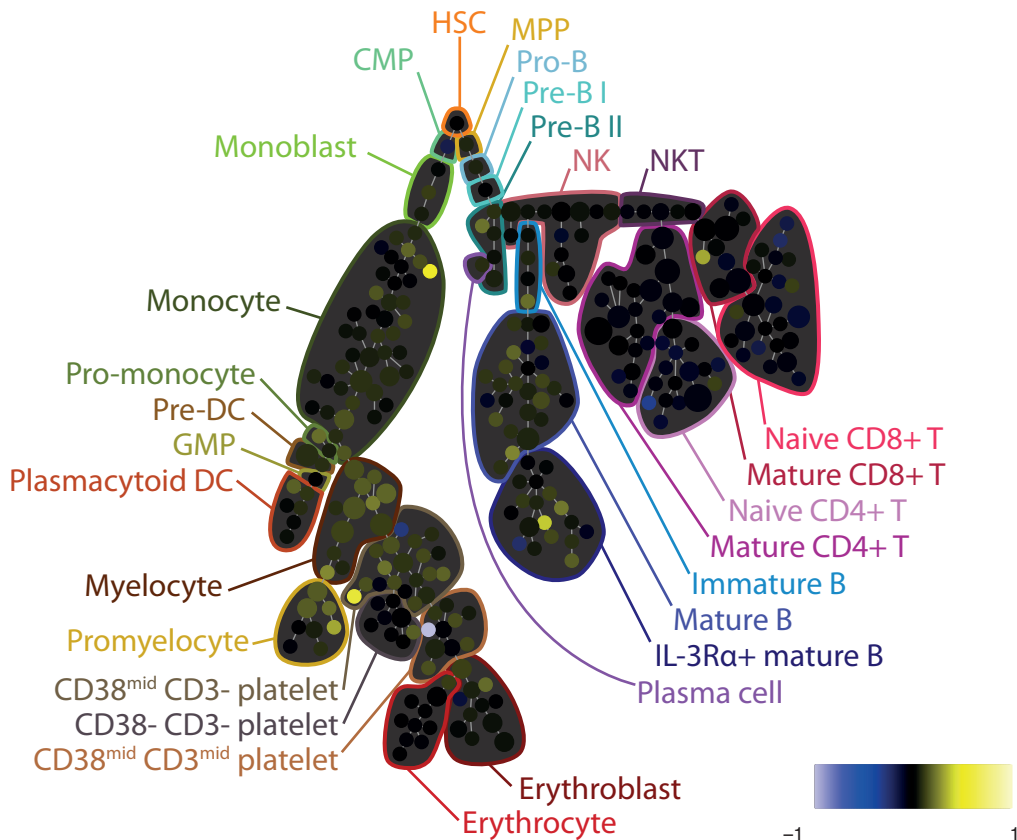

Figure S8A

166-IkBalpha ---- DMSO vs Ref Ratio

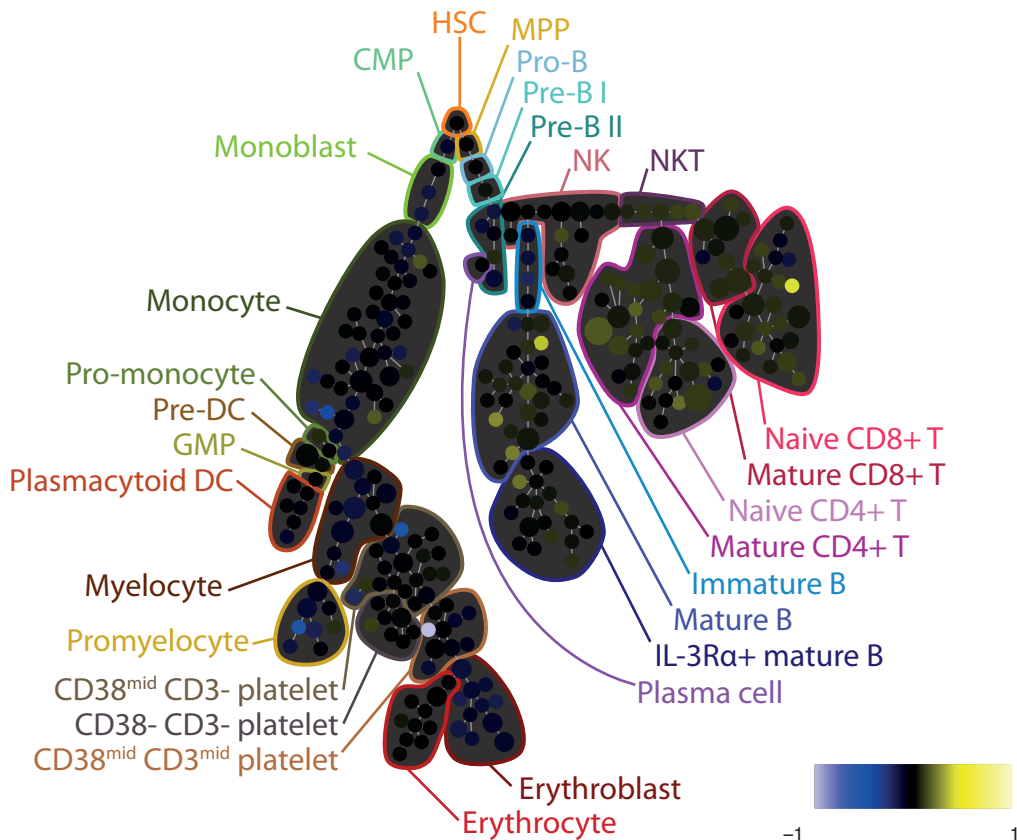

Figure S8A

166-IkBalpha ---- Flt3L vs Ref Ratio

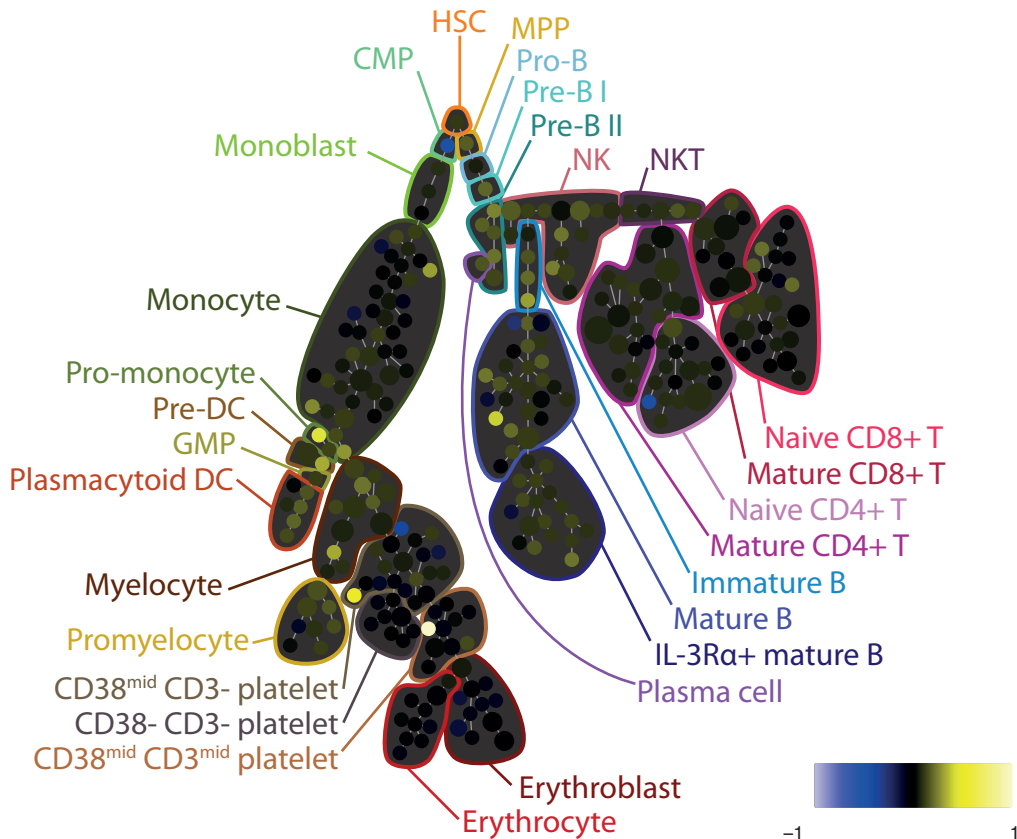

Figure S8A

166-IkBalpha ---- GCSF vs Ref Ratio

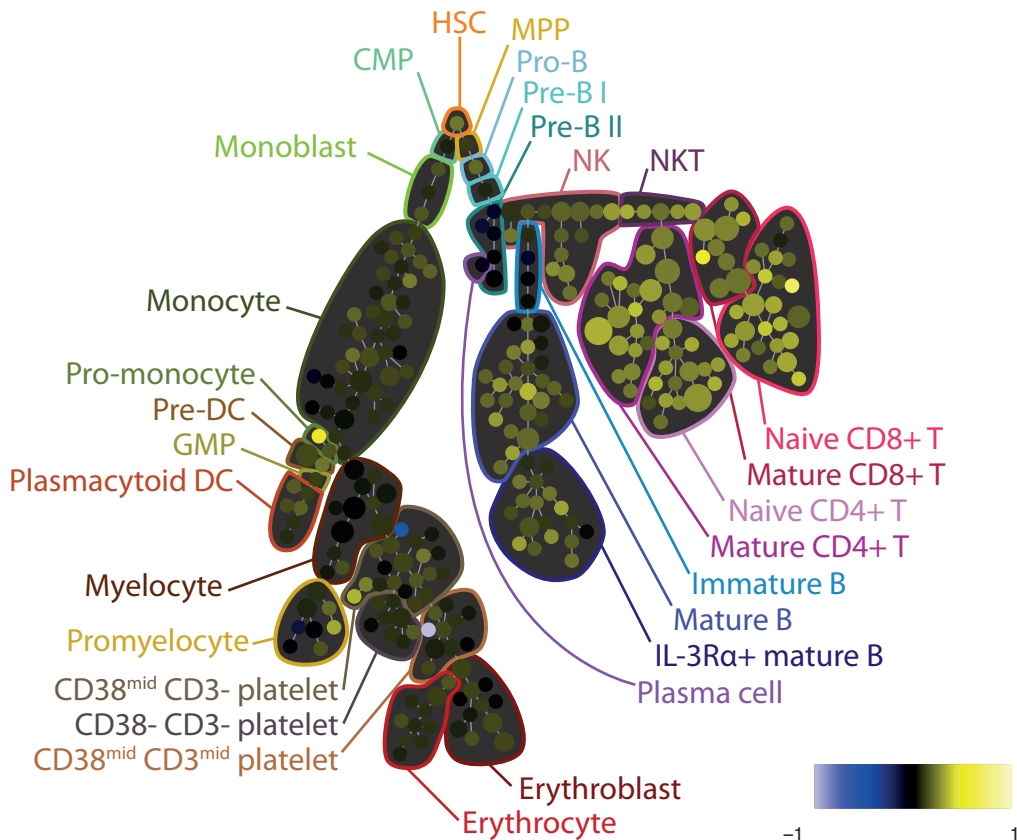



Figure S8A

166-IkBalpha ---- GMCSF vs Ref Ratio

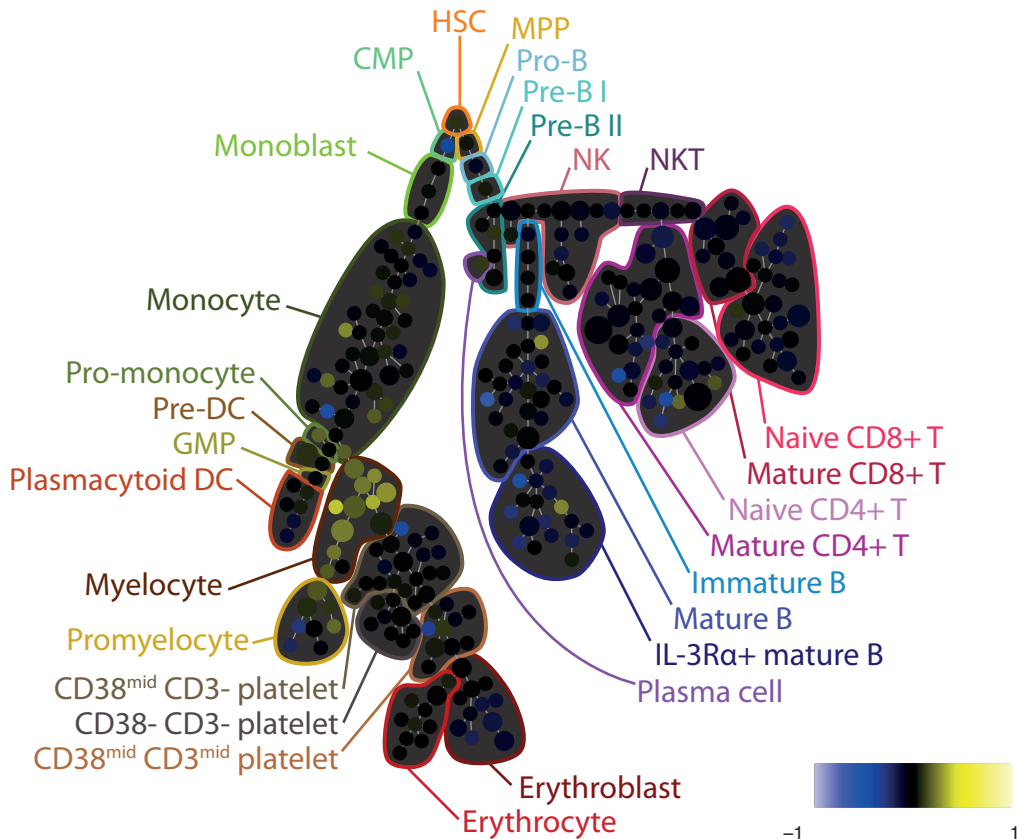

Figure S8A

166-IkBalpa ---- IFNad vs Ref Ratio

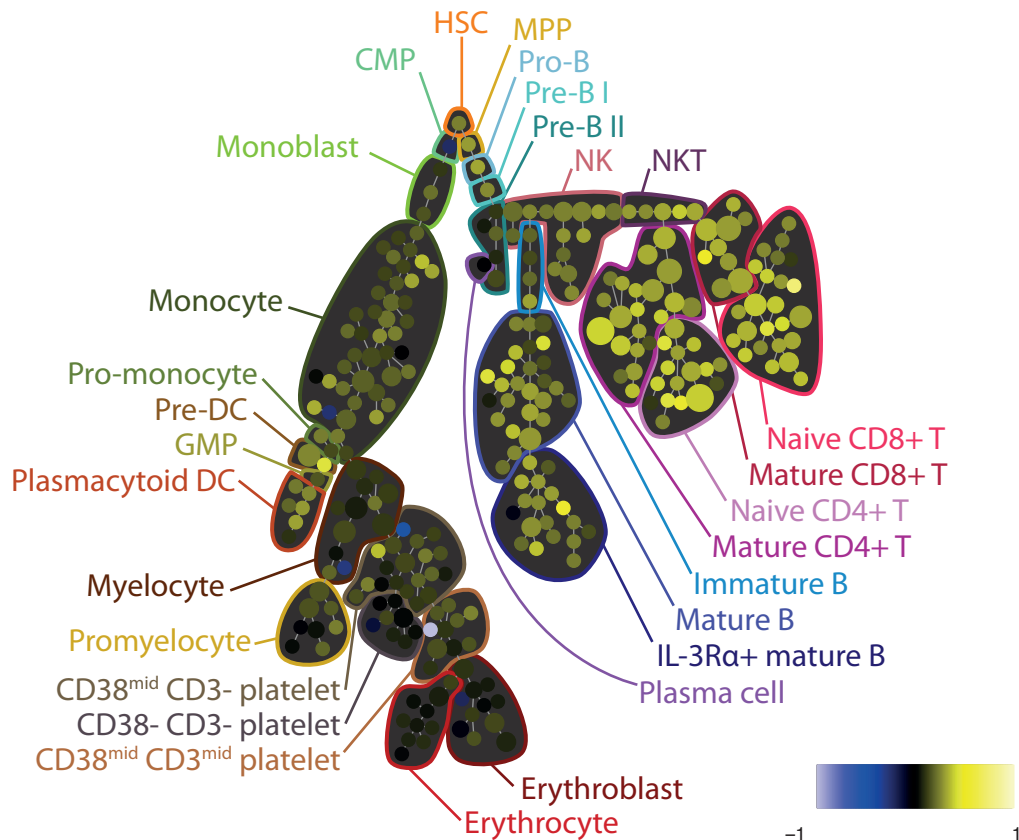

Figure S8A

166-IkBAlpha ---- IL3 vs Ref Ratio

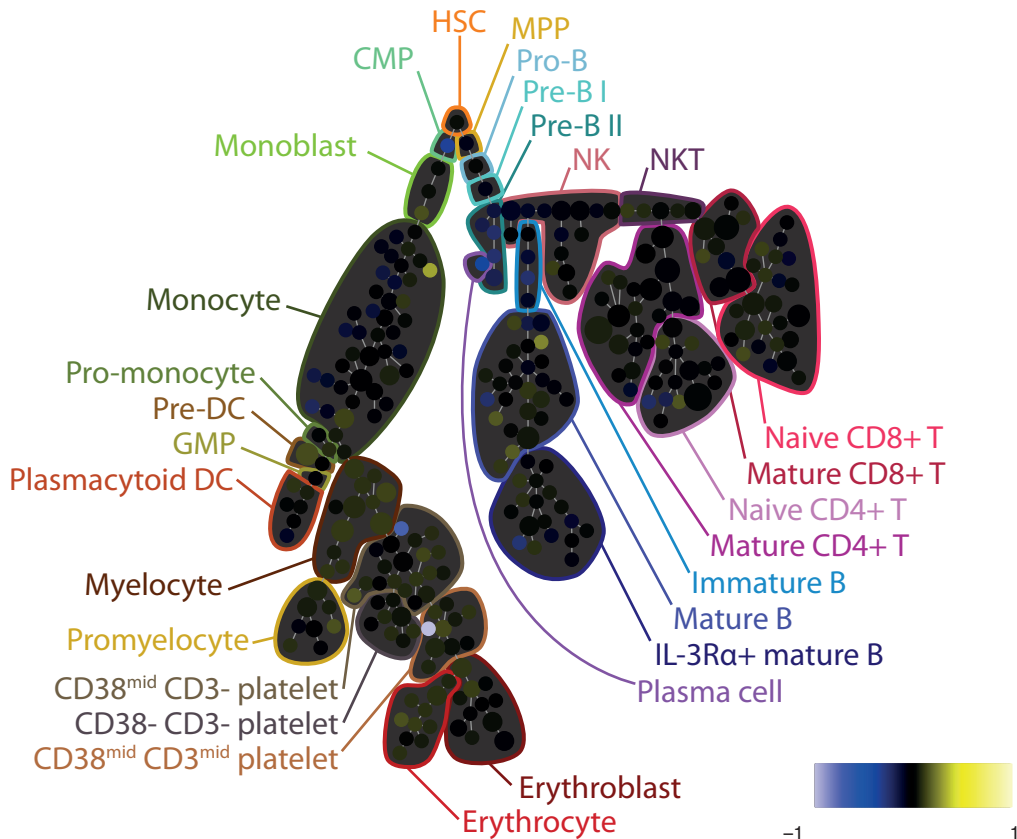

Figure S8A

166-IkBAlpha ---- IL7 vs Ref Ratio

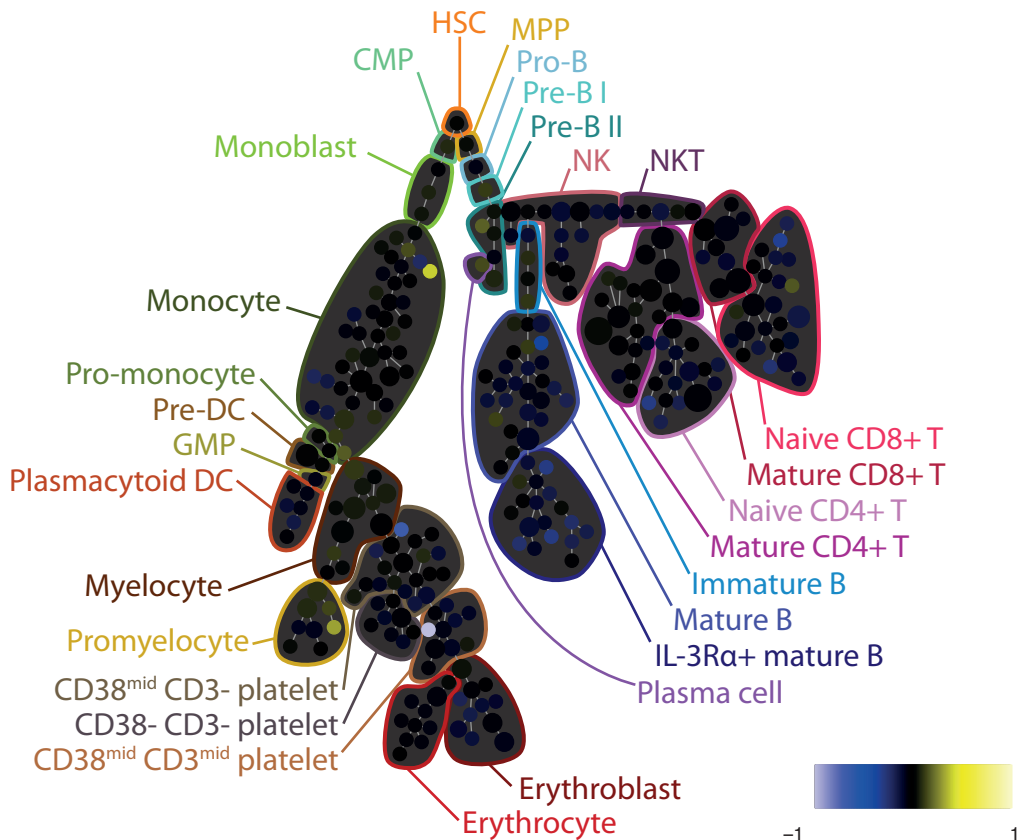

Figure S8A

166-IkBalpha ---- LPS vs Ref Ratio

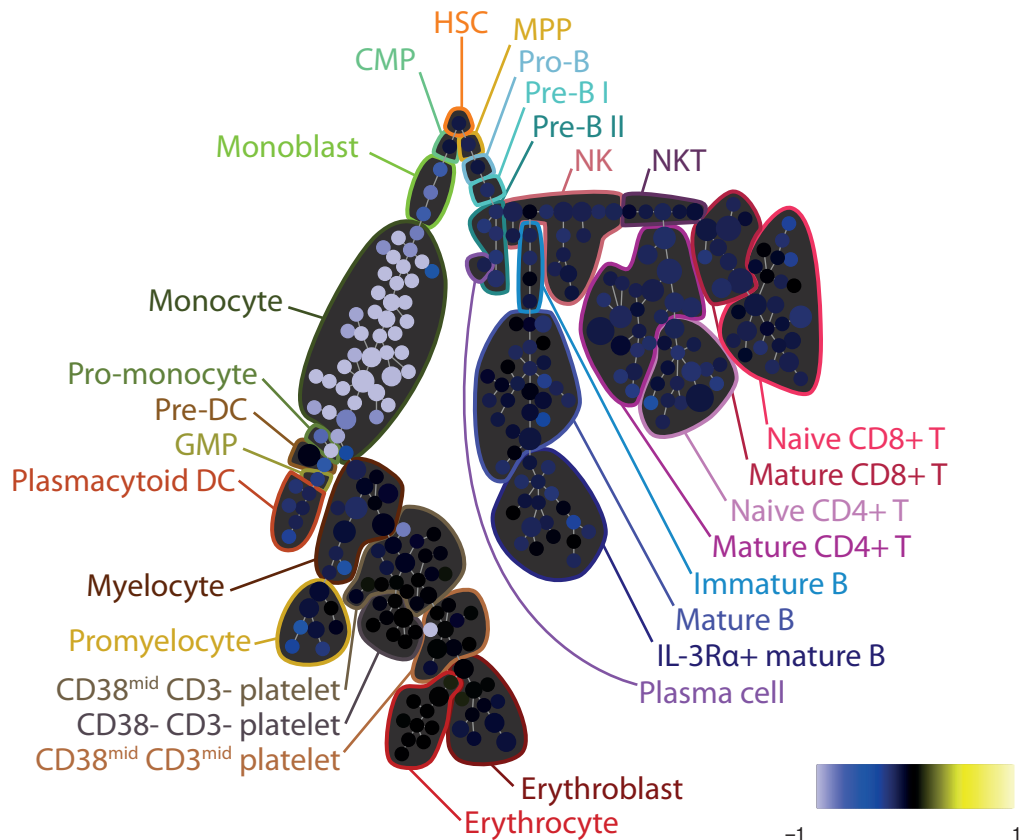

Figure S8A

166-IkBalpha ---- PMAiono vs Ref Ratio

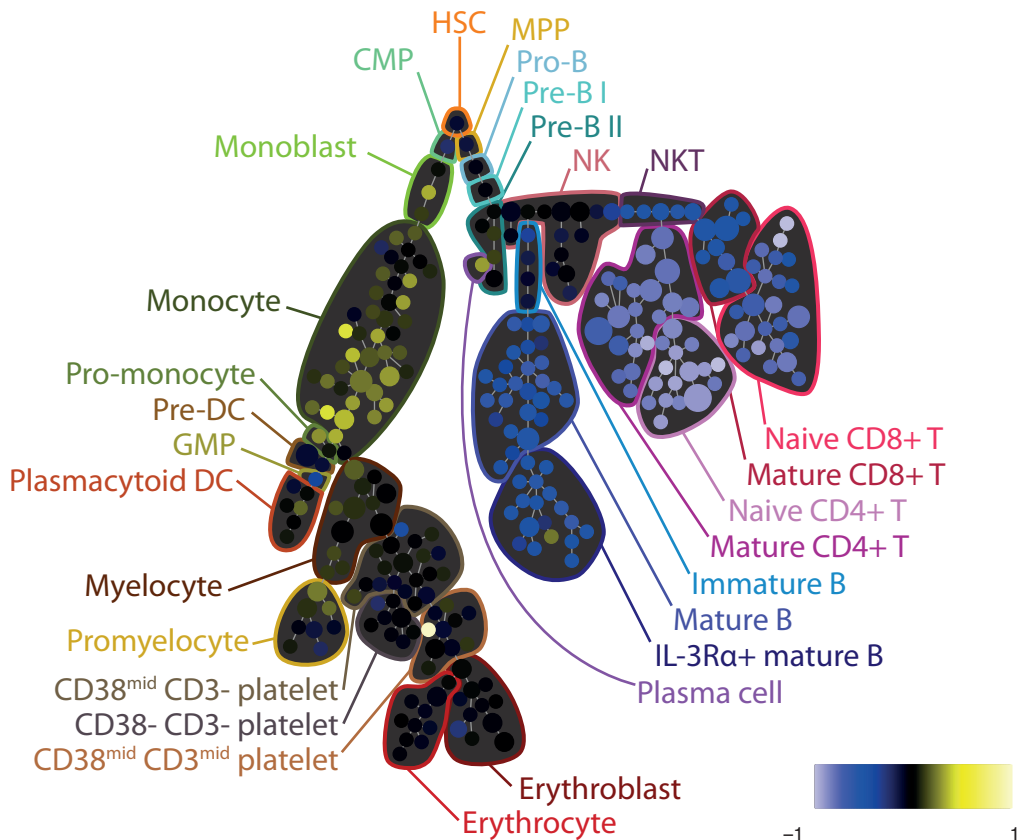

Figure S8A

166-IkBalpa ---- PVO4 vs Ref Ratio

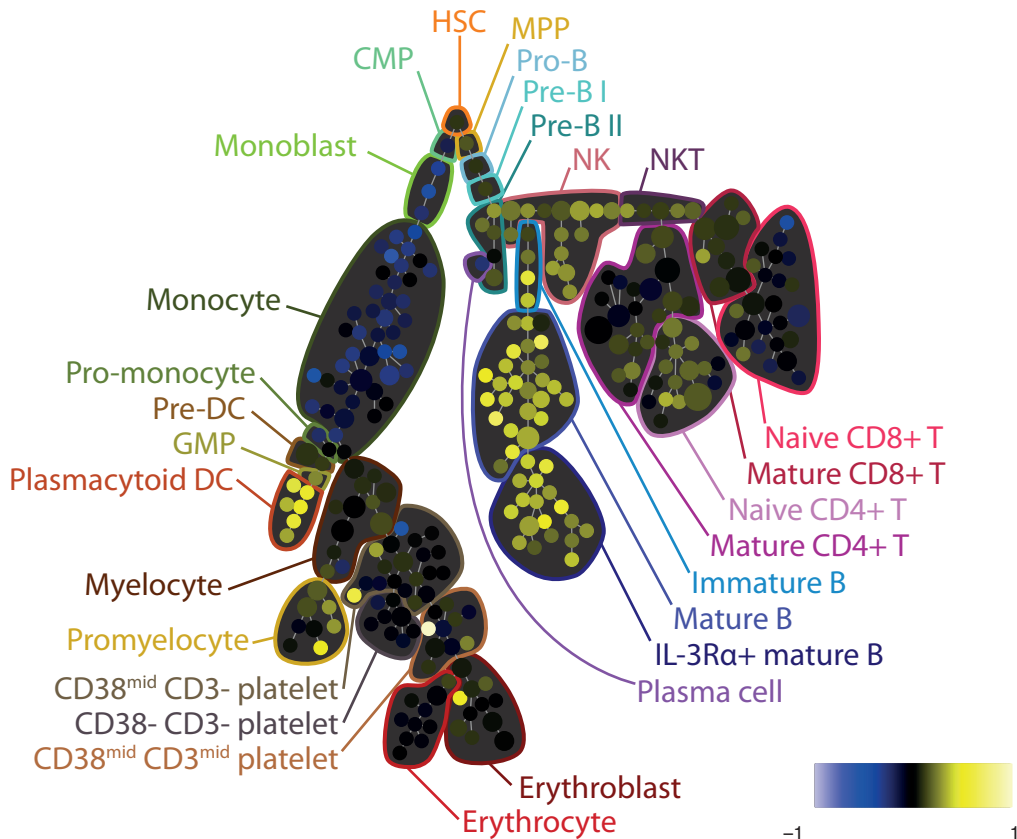

Figure S8A

166-IkBalpha ---- SCF vs Ref Ratio

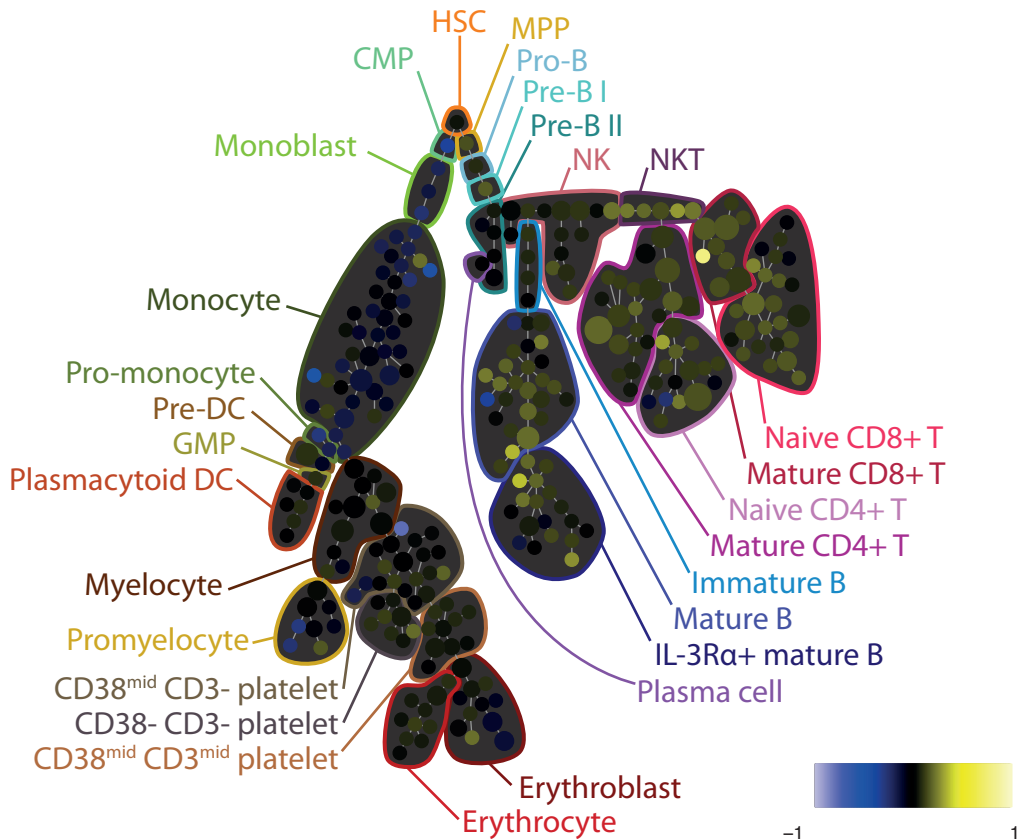



Figure S8A

166-IkBalpa ---- TNFa vs Ref Ratio

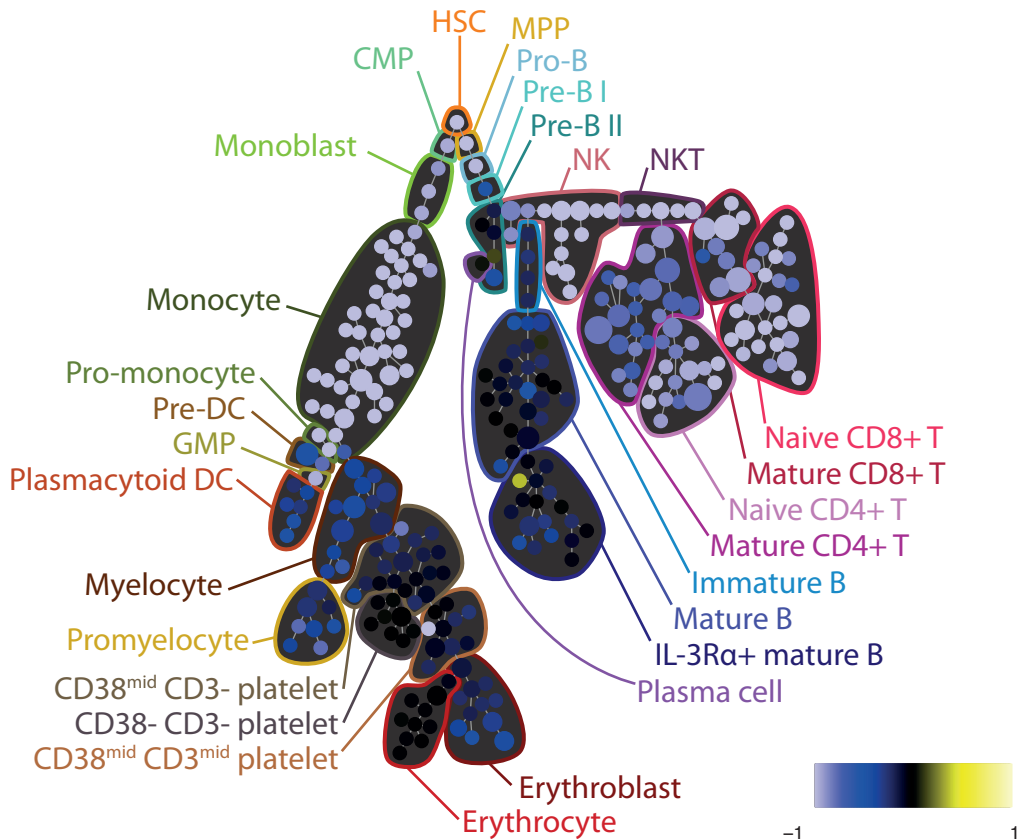

Figure S8A

166-IkBalpha ---- TPO vs Ref Ratio

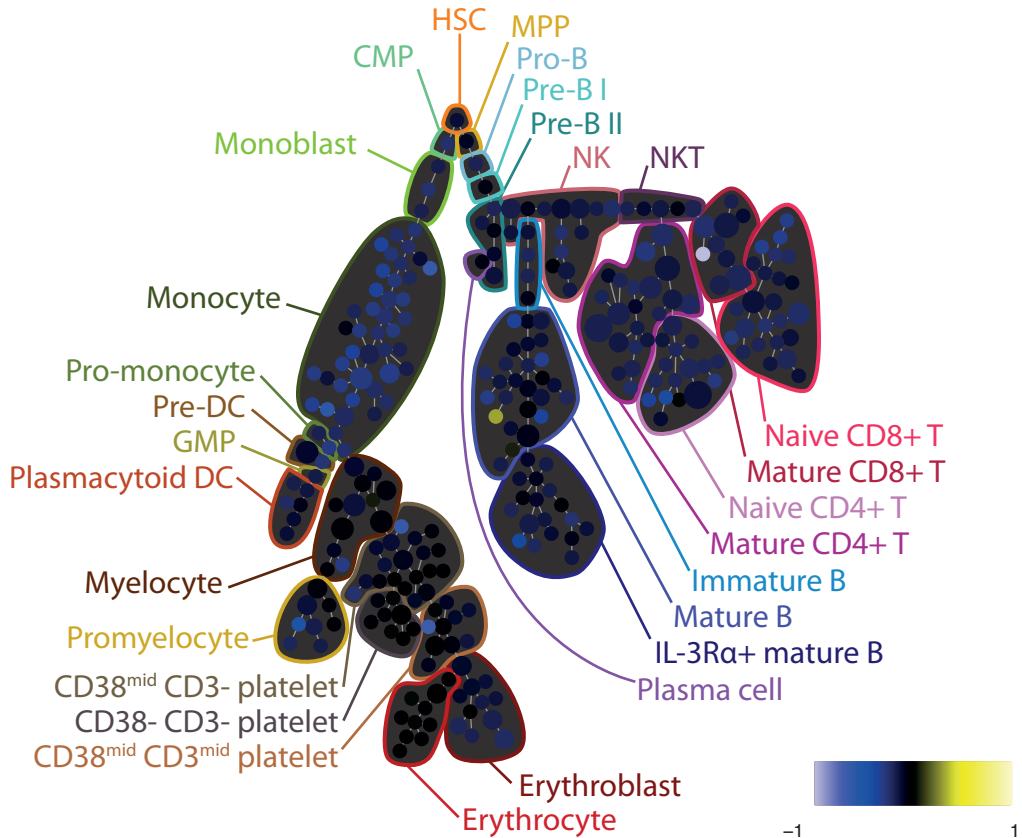

Figure S8A

168-pH3 ---- BCR vs Ref Ratio

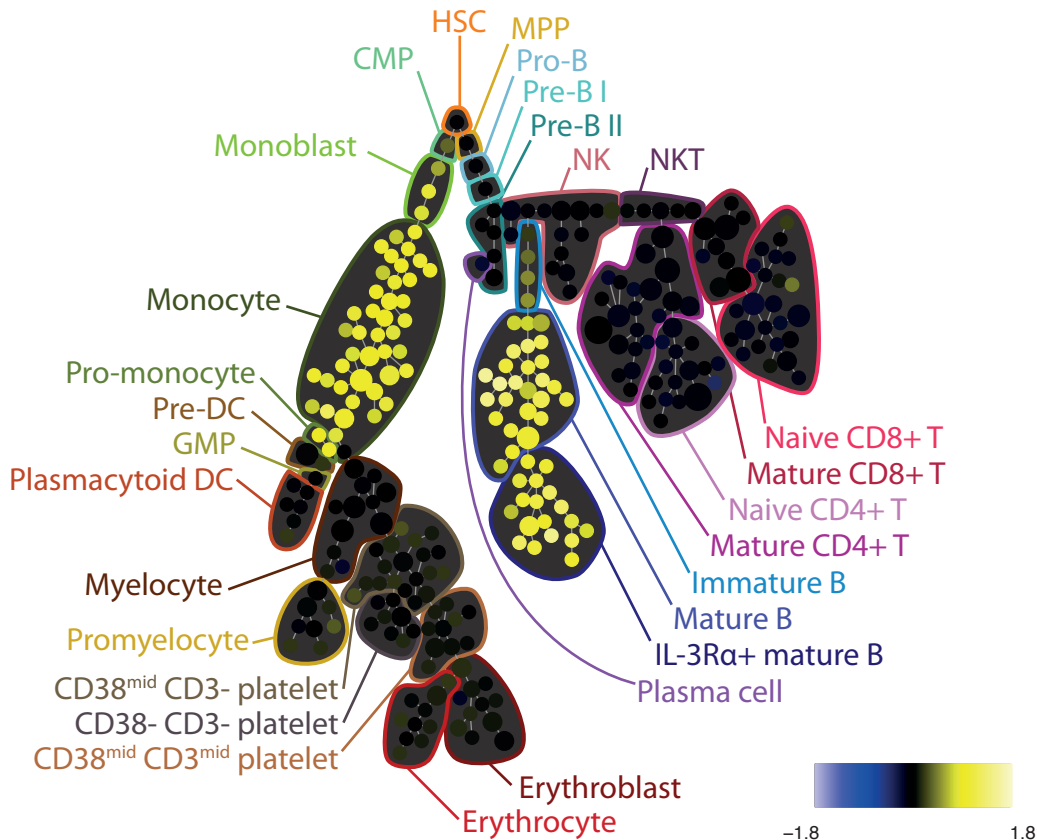

Figure S8A

168-pH3 --- DMSO vs Ref Ratio

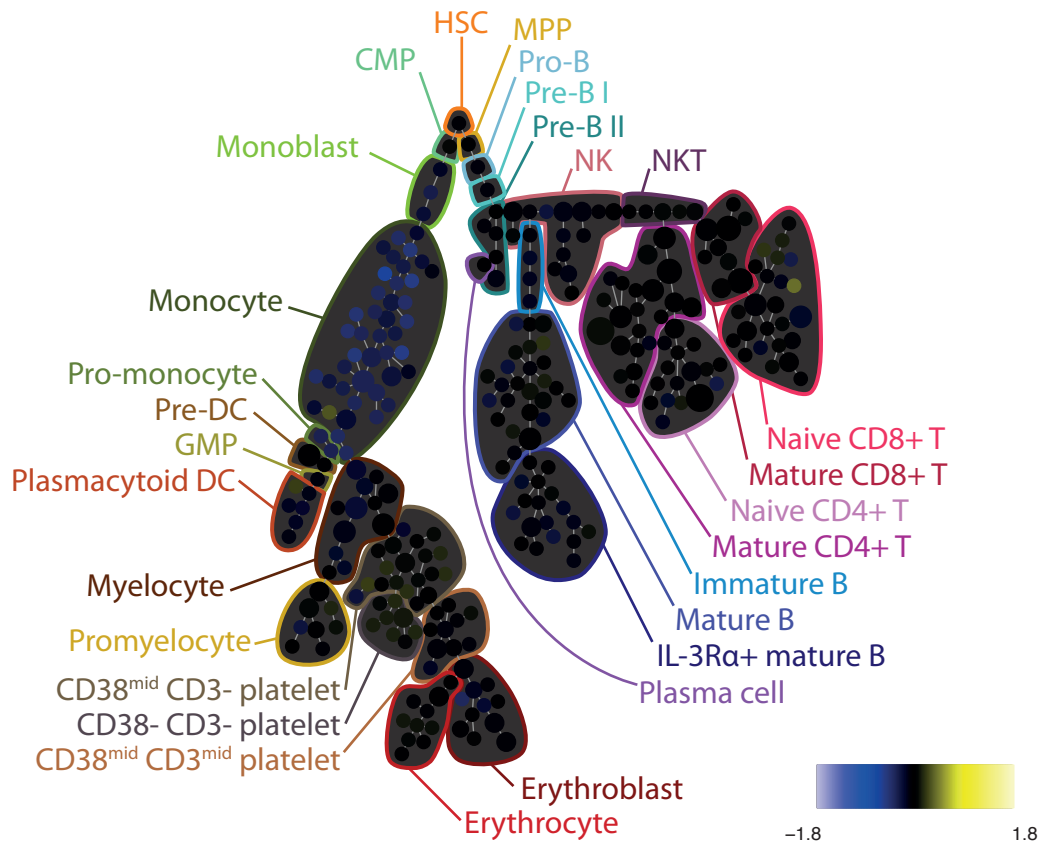

Figure S8A

168-pH3 ---- Flt3L vs Ref Ratio

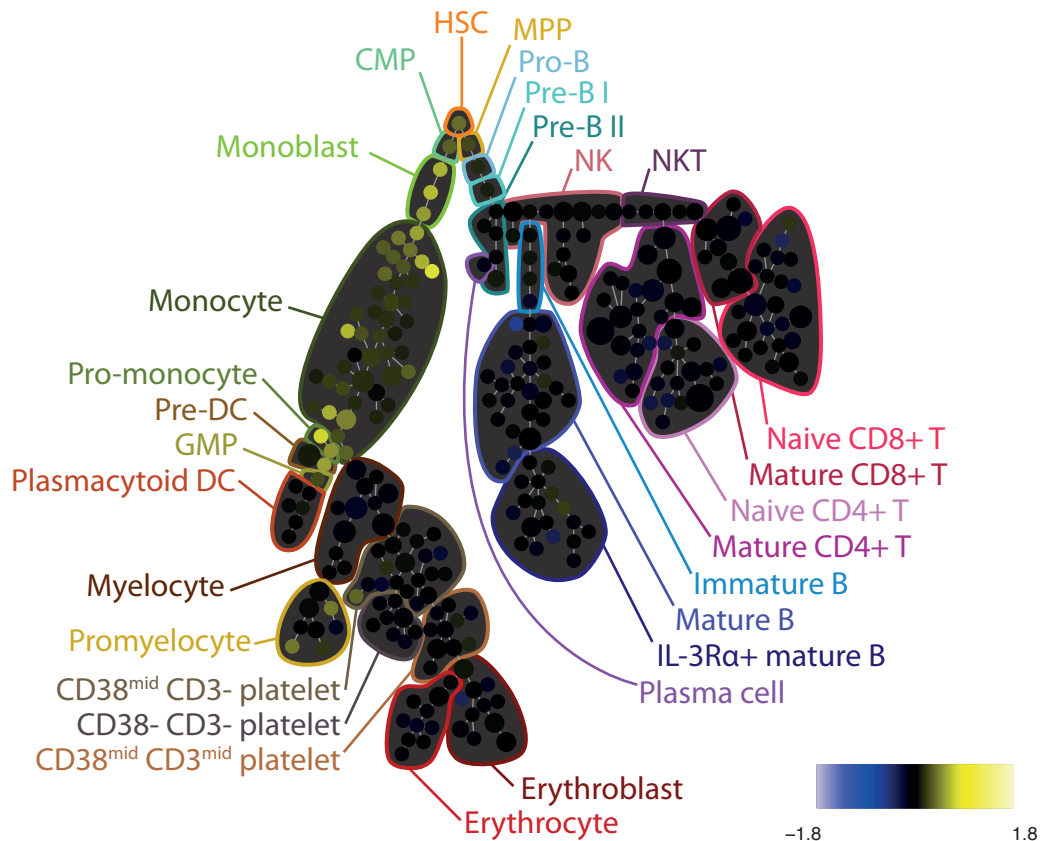

Figure S8A

168-pH3 ---- GCSF vs Ref Ratio

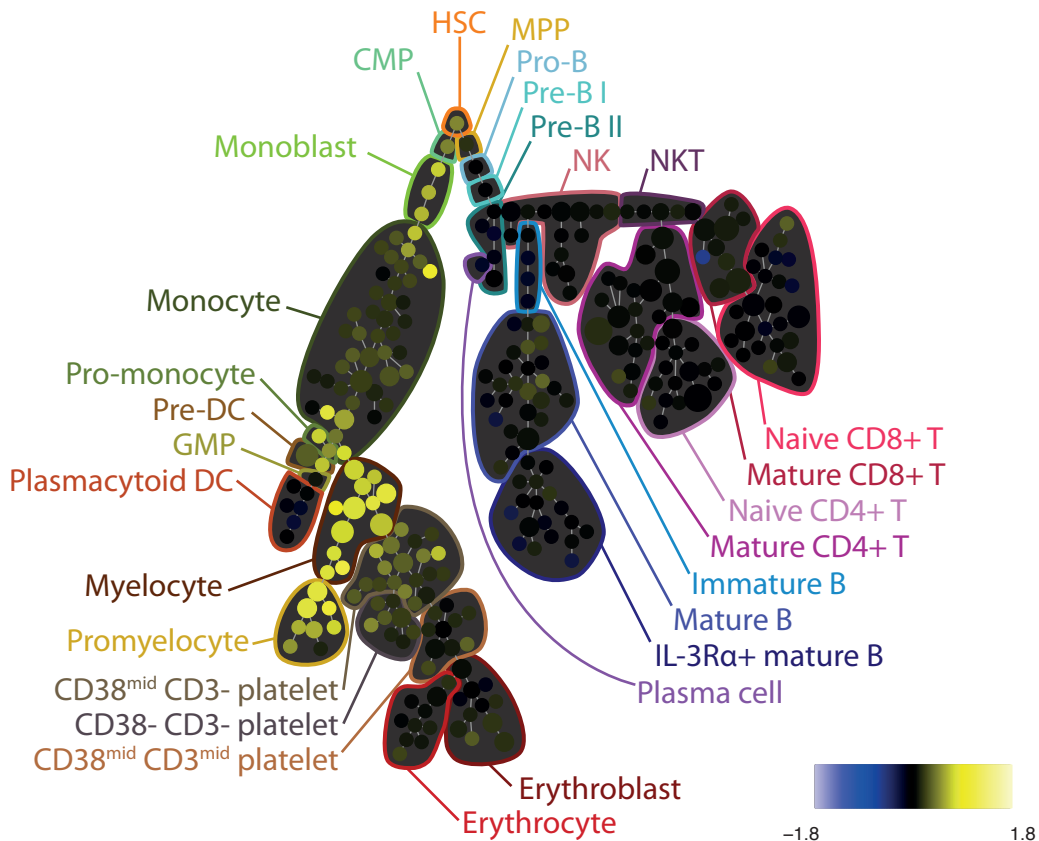

Figure S8A

168-pH3 ---- GMCSF vs Ref Ratio

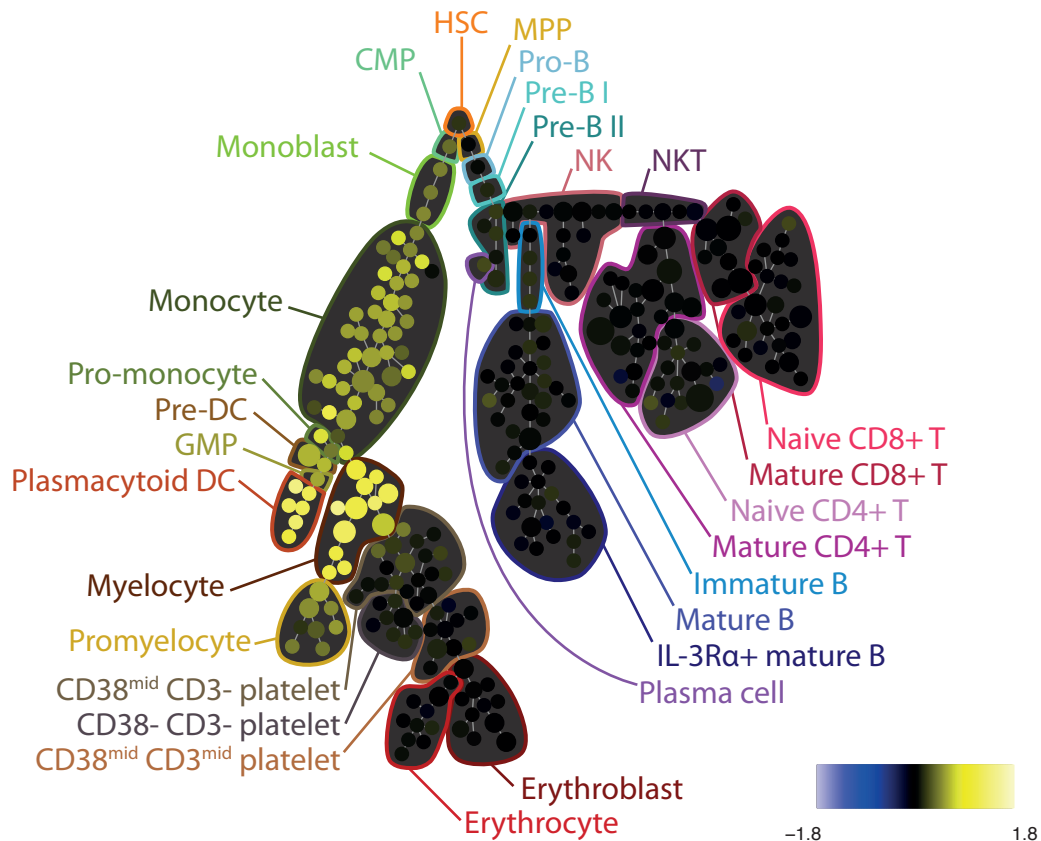

Figure S8A

168-pH3 ---- IFNad vs Ref Ratio

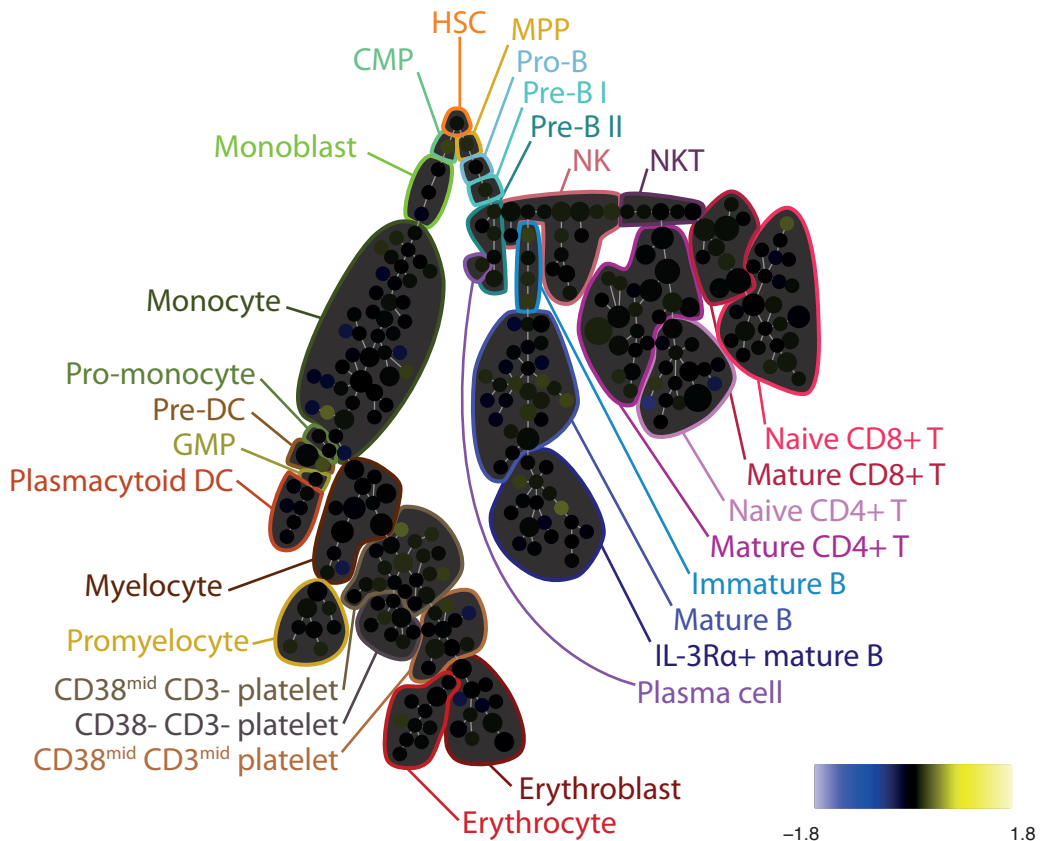



Figure S8A

168-pH3 ---- IL3 vs Ref Ratio

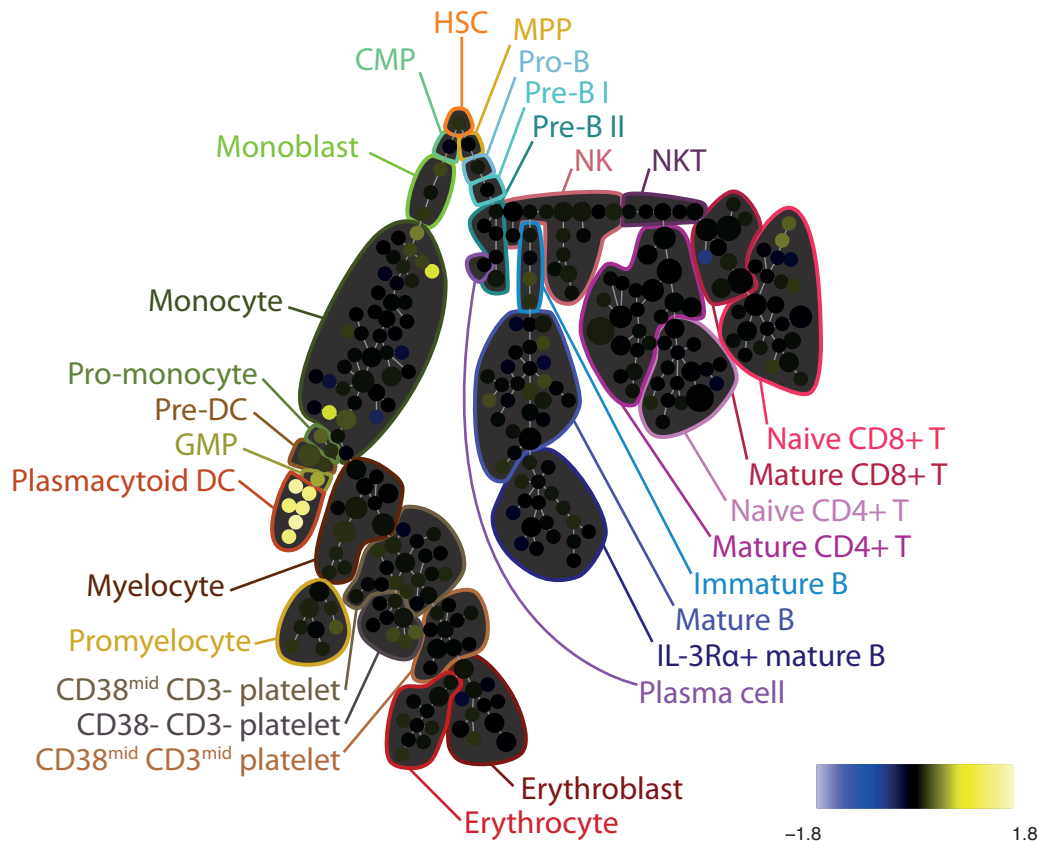

Figure S8A

168-pH3 ---- IL7 vs Ref Ratio

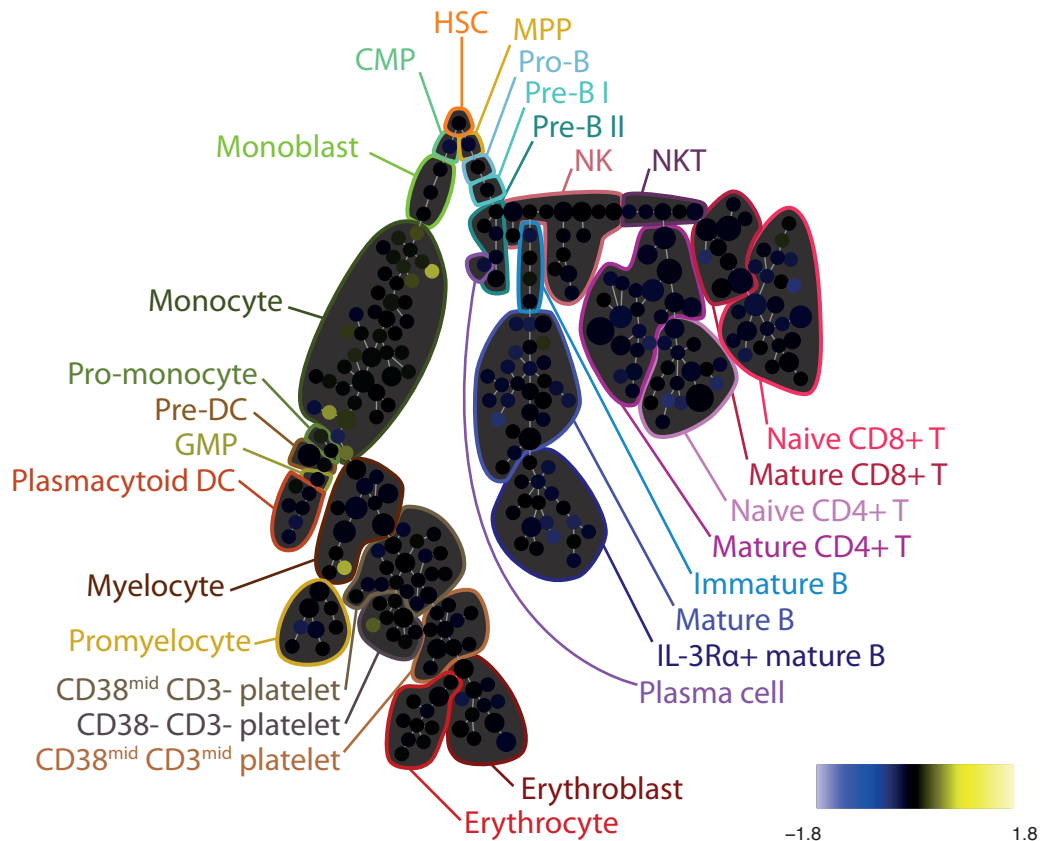

Figure S8A

168-pH3 --- LPS vs Ref Ratio

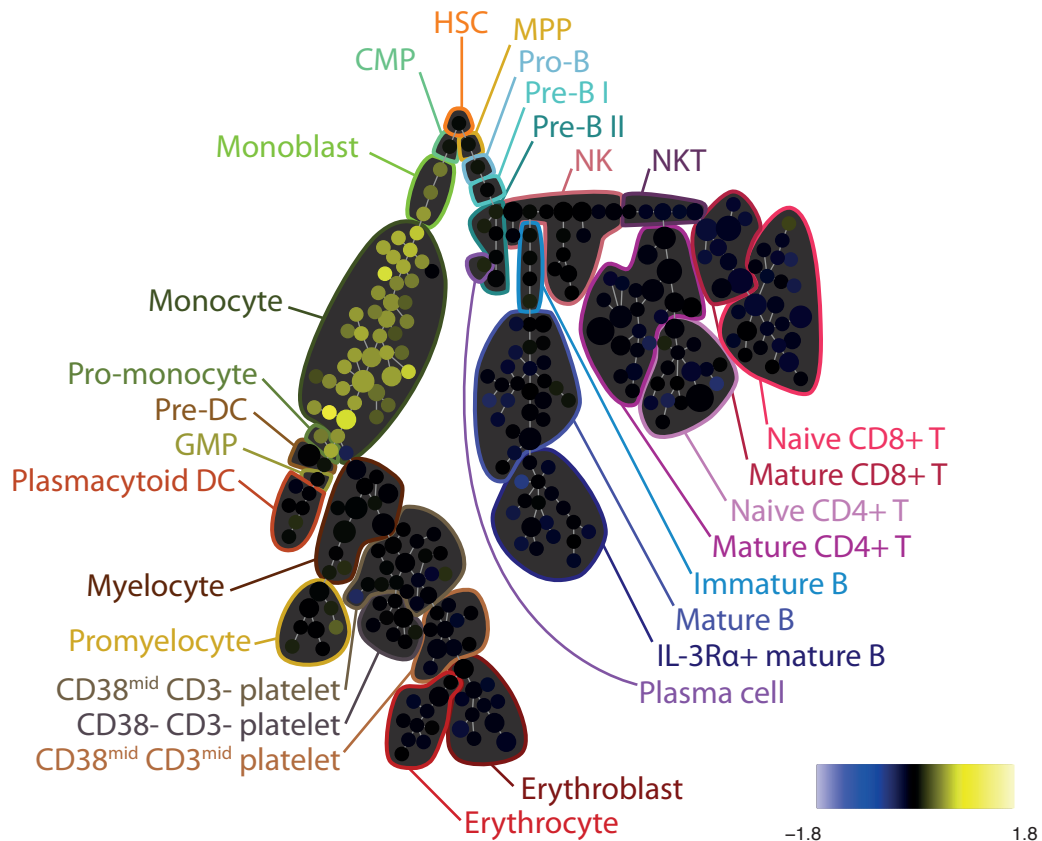

Figure S8A

168-pH3 ---- PMAiono vs Ref Ratio

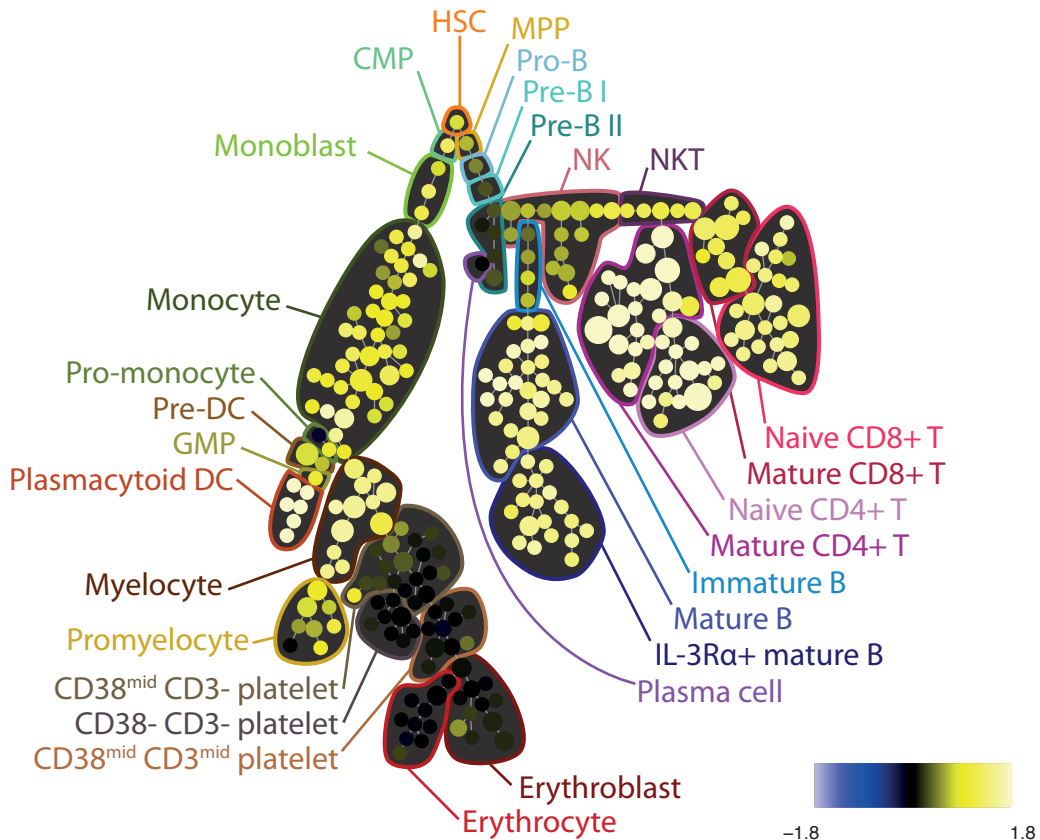

Figure S8A

168-pH3 ---- PVO4 vs Ref Ratio

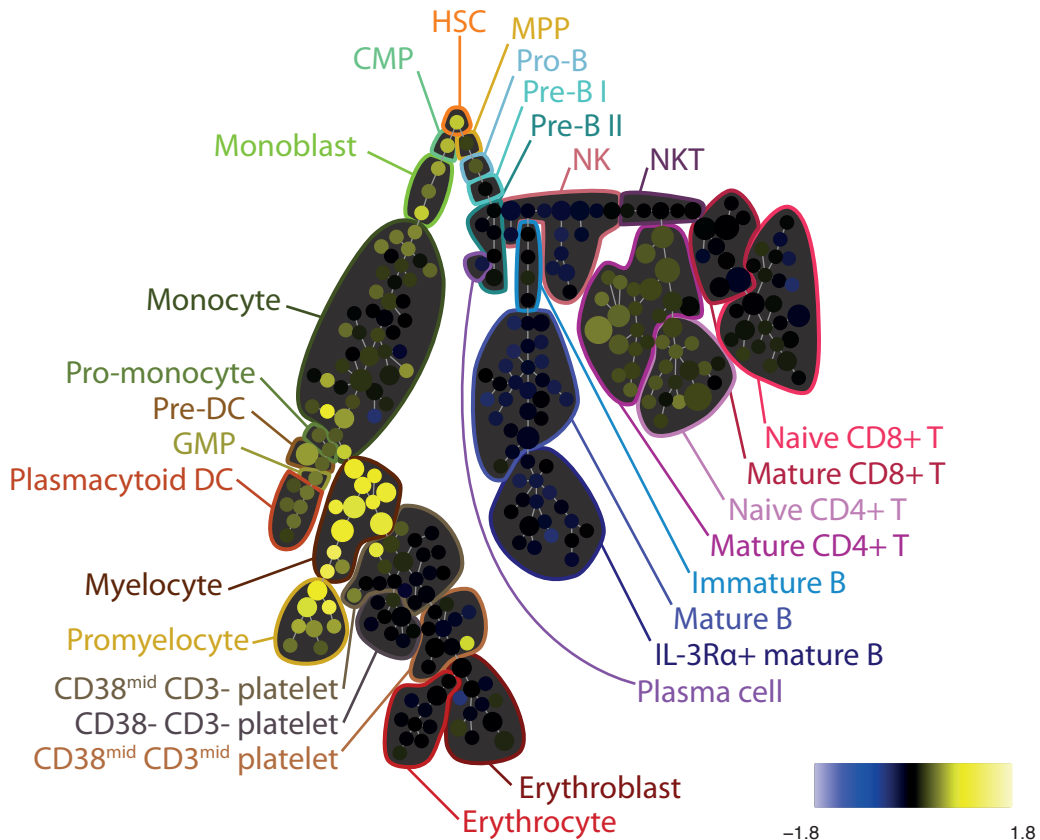

Figure S8A

168-pH3 ---- SCF vs Ref Ratio

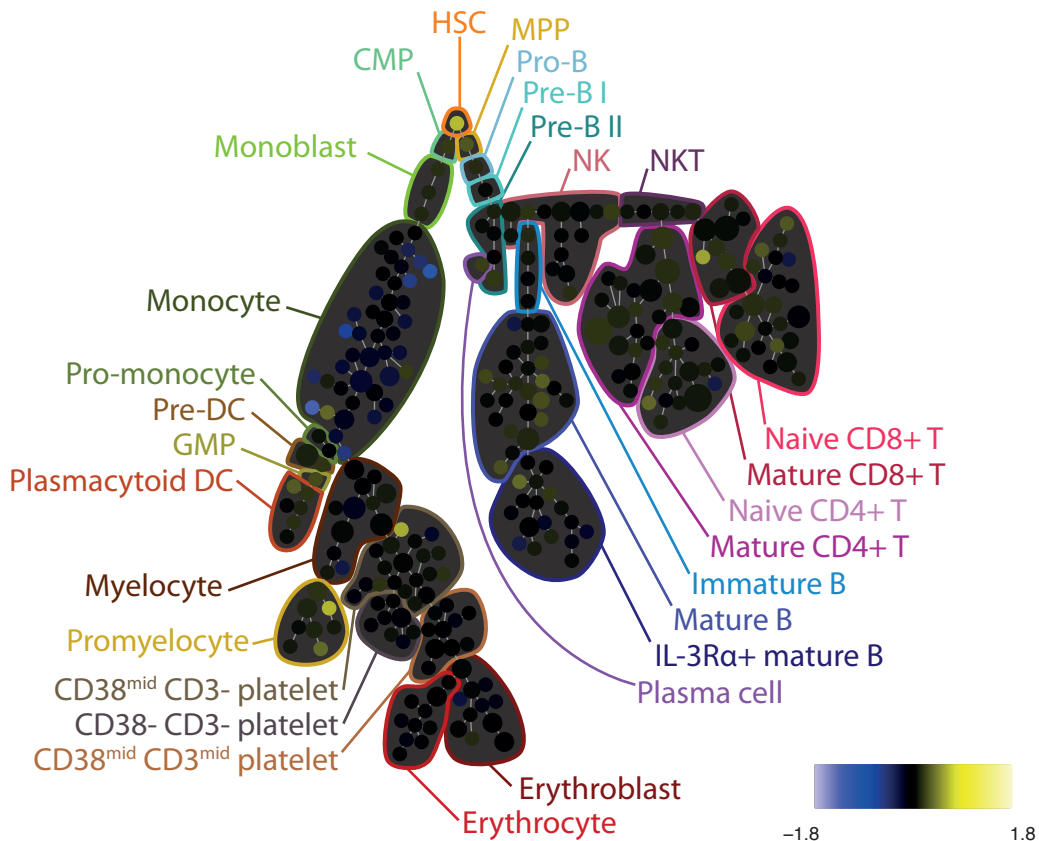

Figure S8A

168-pH3 ---- TNFa vs Ref Ratio

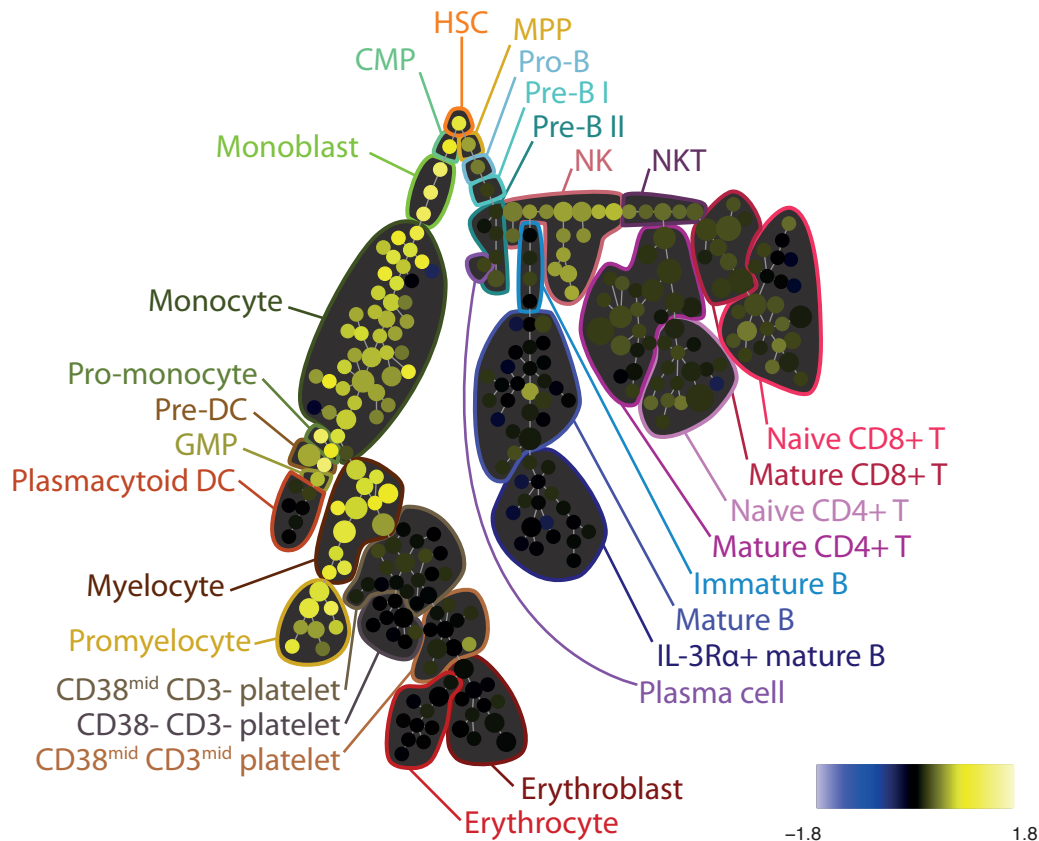

Figure S8A

168-pH3 ---- TPO vs Ref Ratio

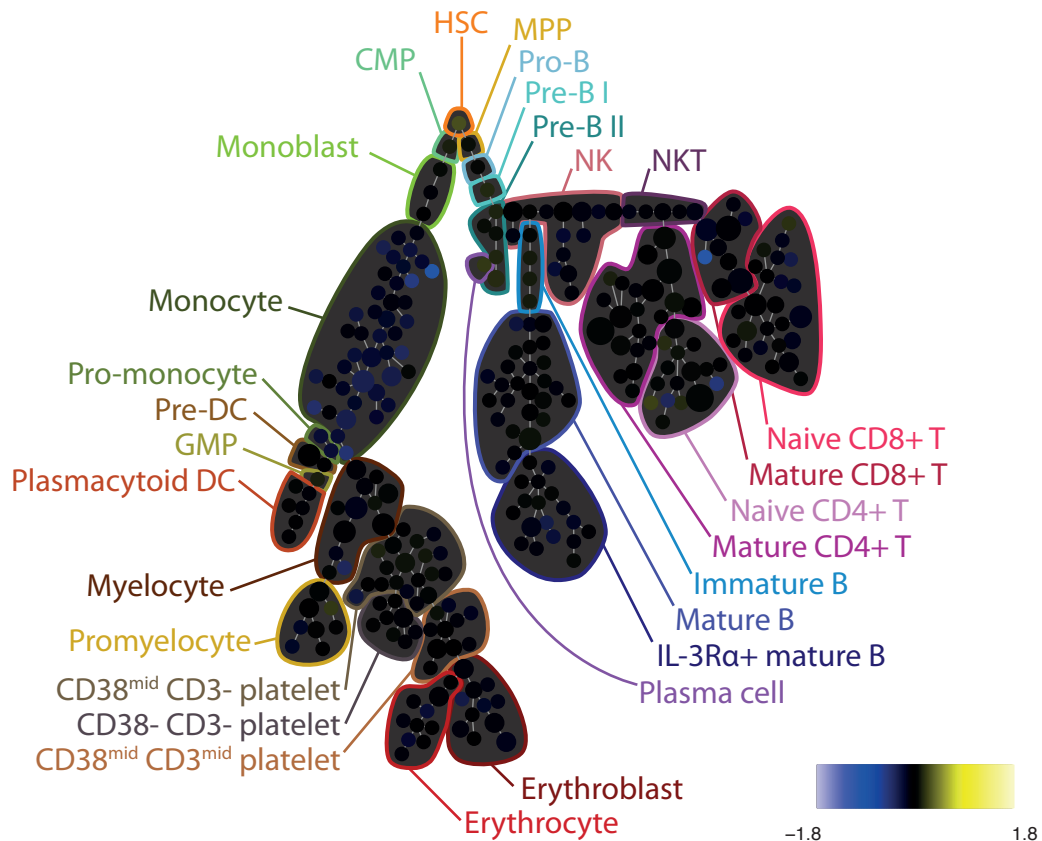



Figure S8A

169-pP38 ---- BCR vs Ref Ratio

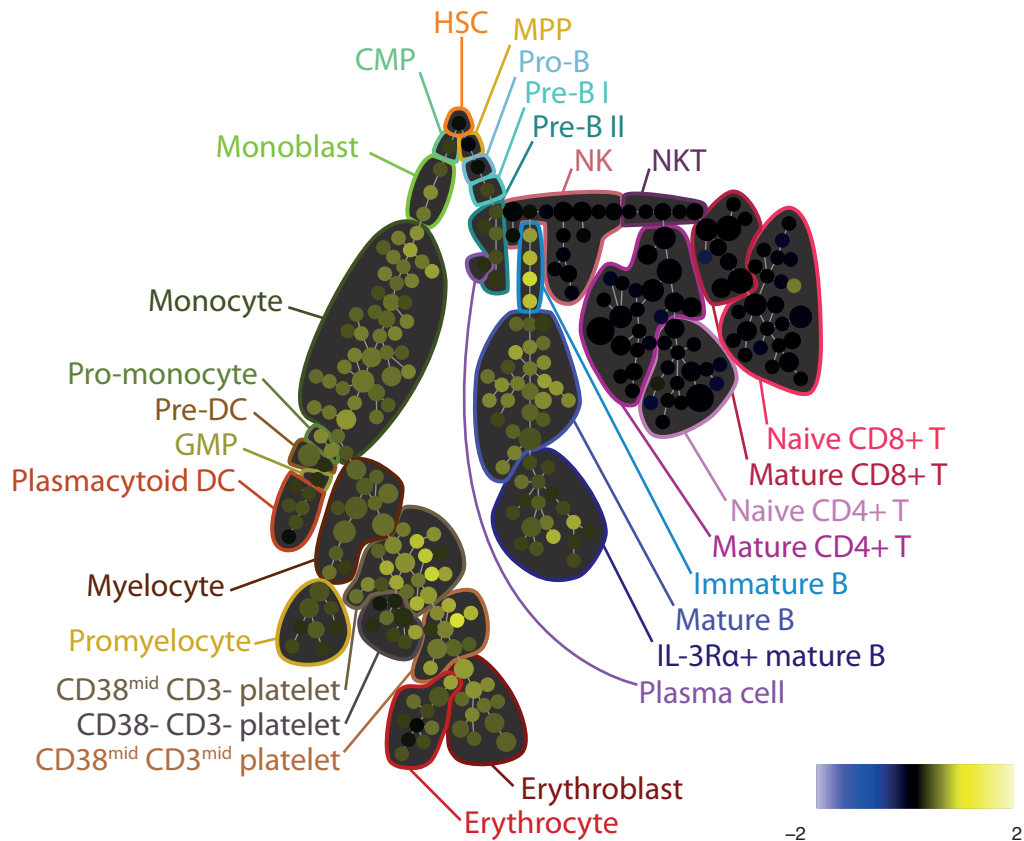

Figure S8A

169-pP38 ---- DMSO vs Ref Ratio

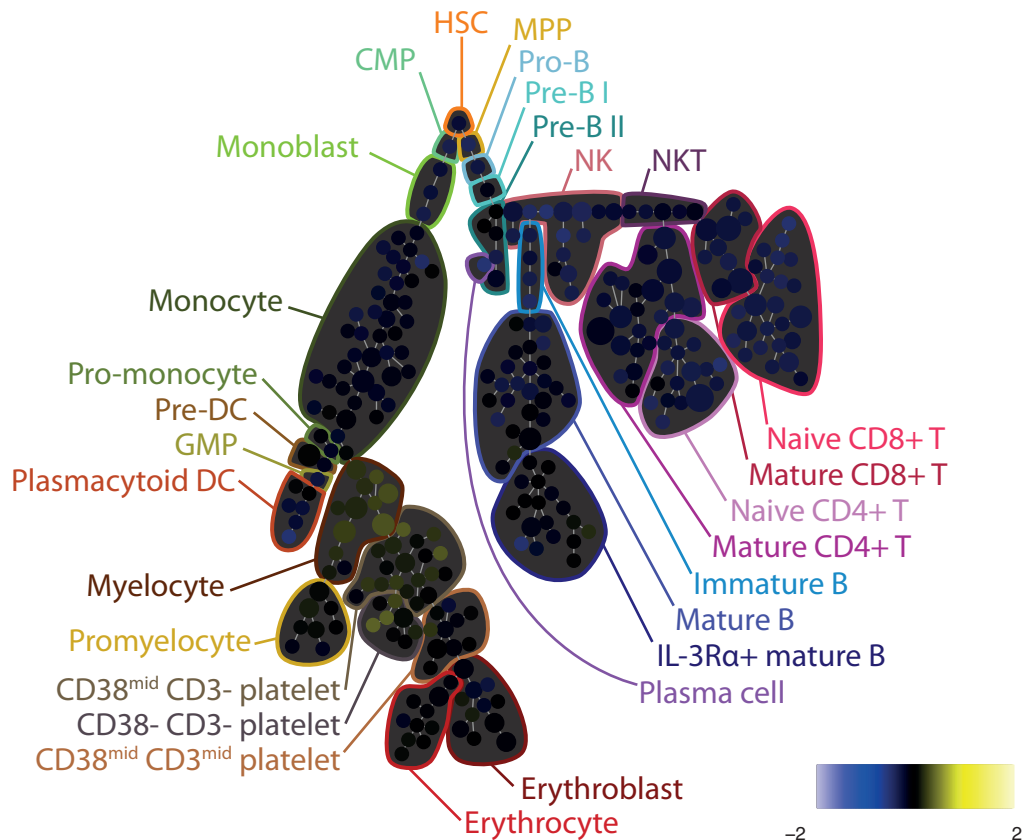

Figure S8A

169-pP38 ---- Flt3L vs Ref Ratio

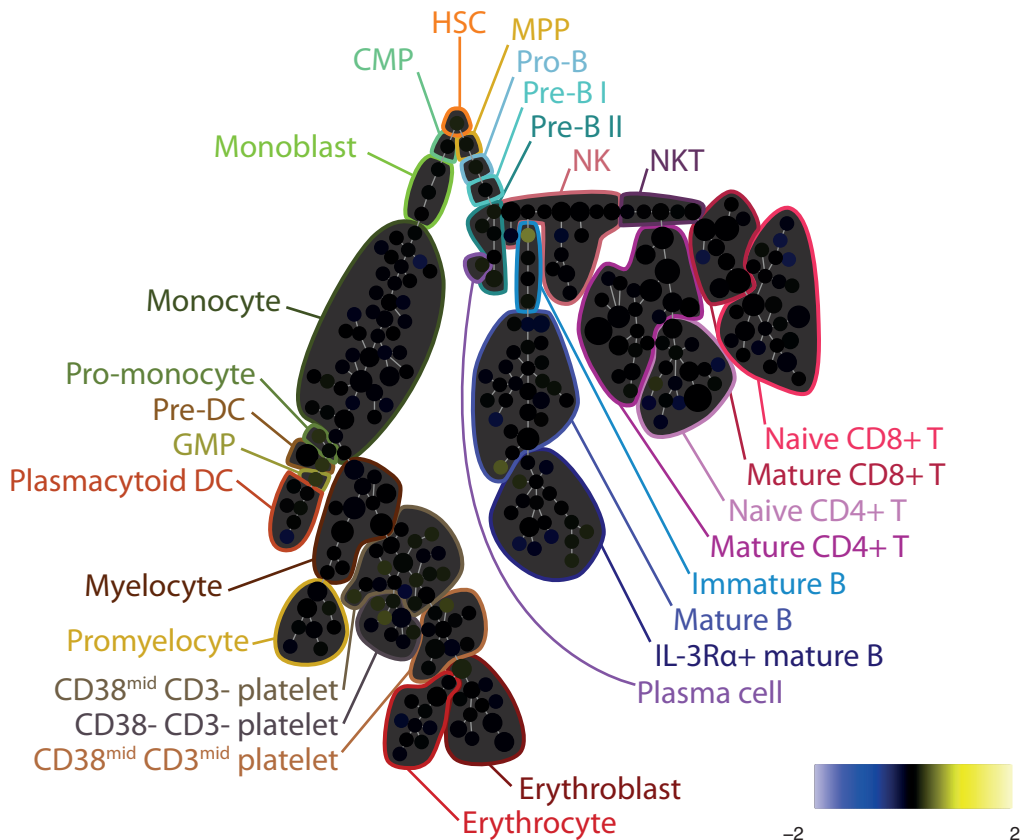

Figure S8A

169-pP38 — GCSF vs Ref Ratio

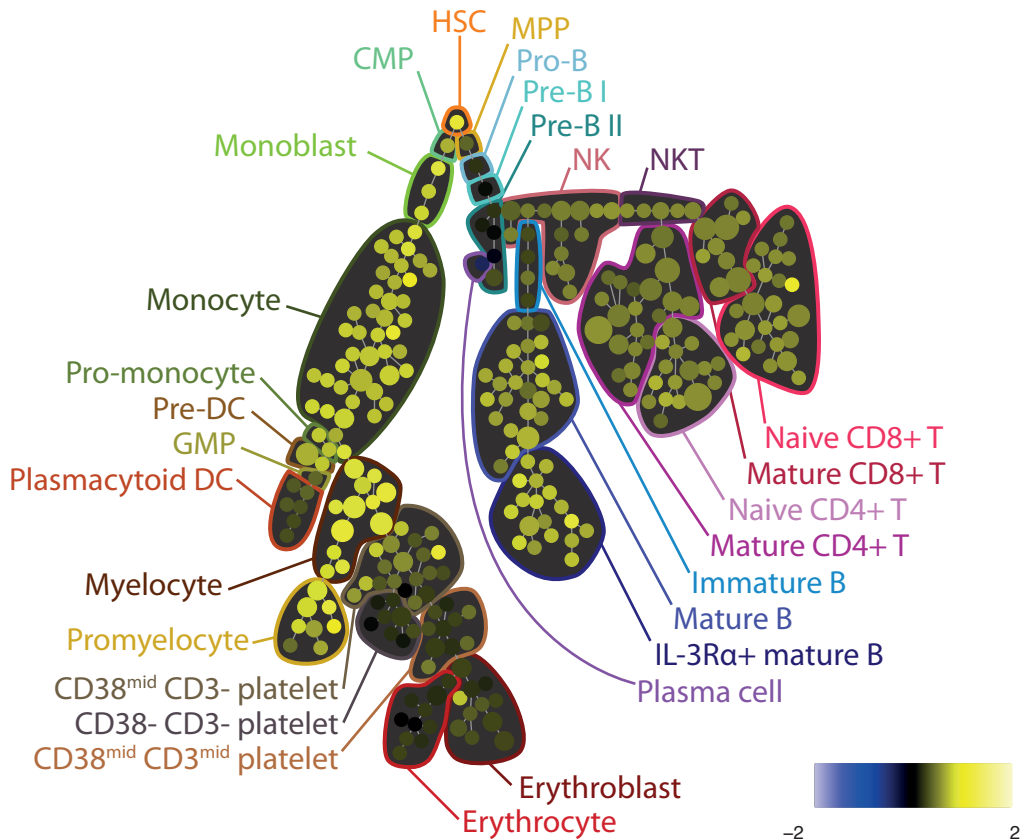

Figure S8A

169-pP38 --- GMCSF vs Ref Ratio

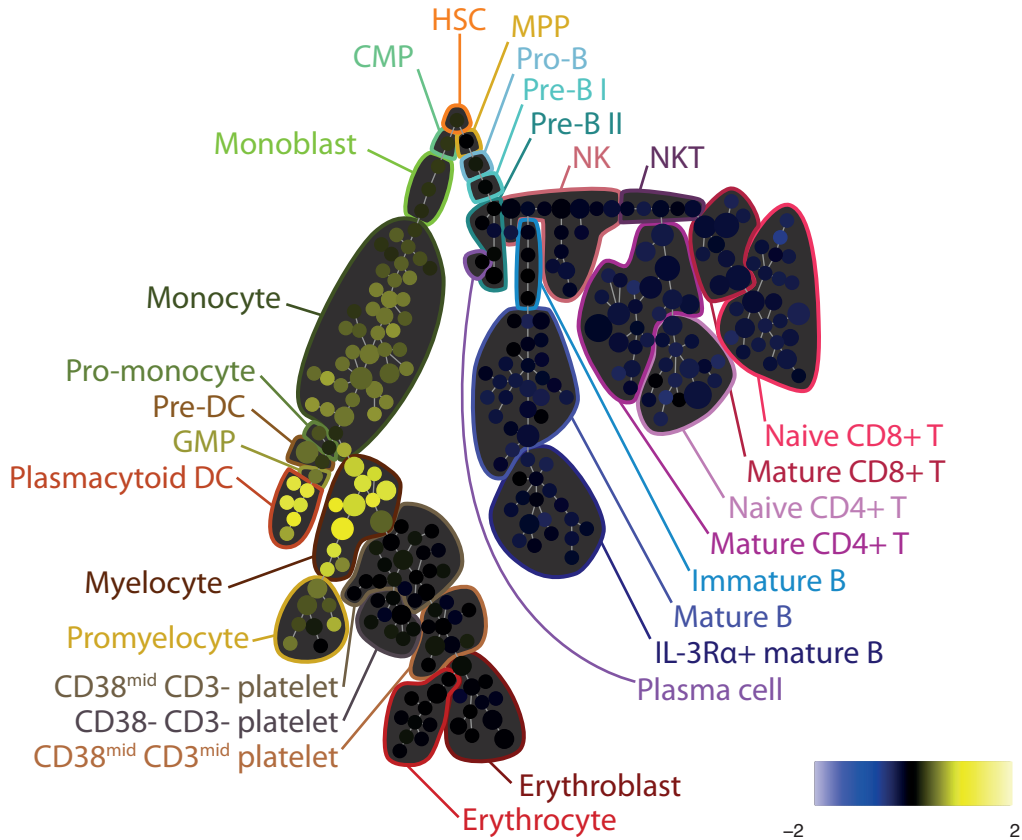

Figure S8A

169-pP38 ---- IFNad vs Ref Ratio

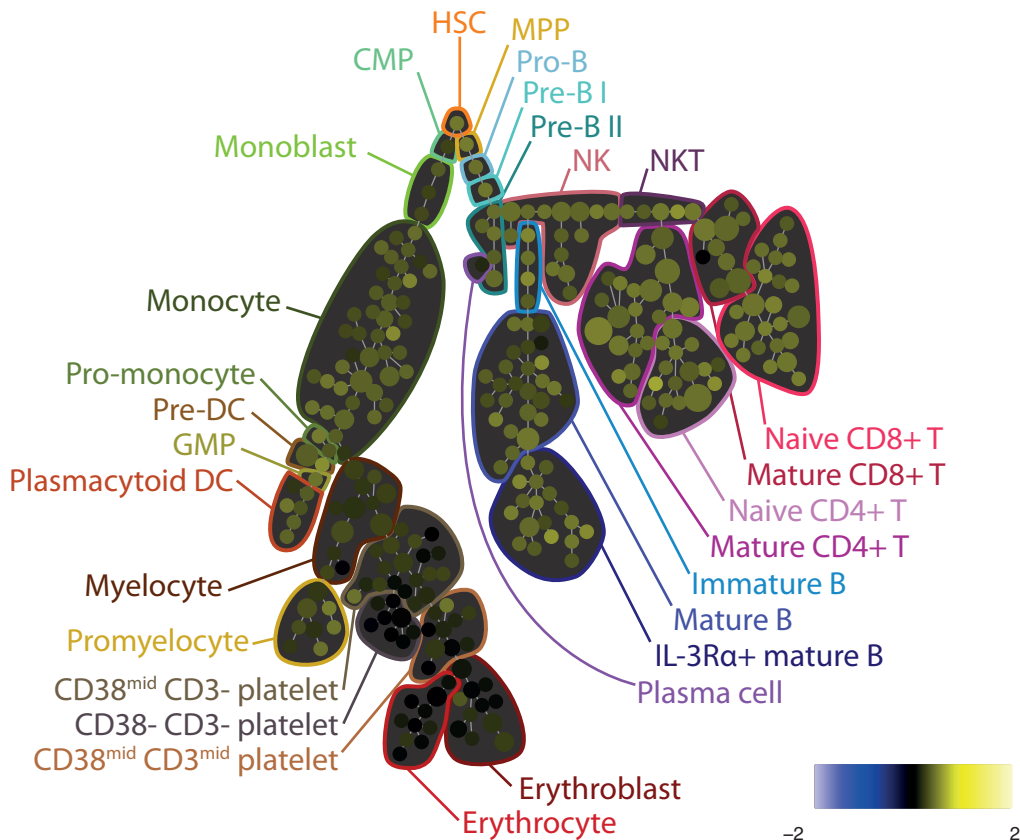

Figure S8A

169-pP38 ---- IL3 vs Ref Ratio

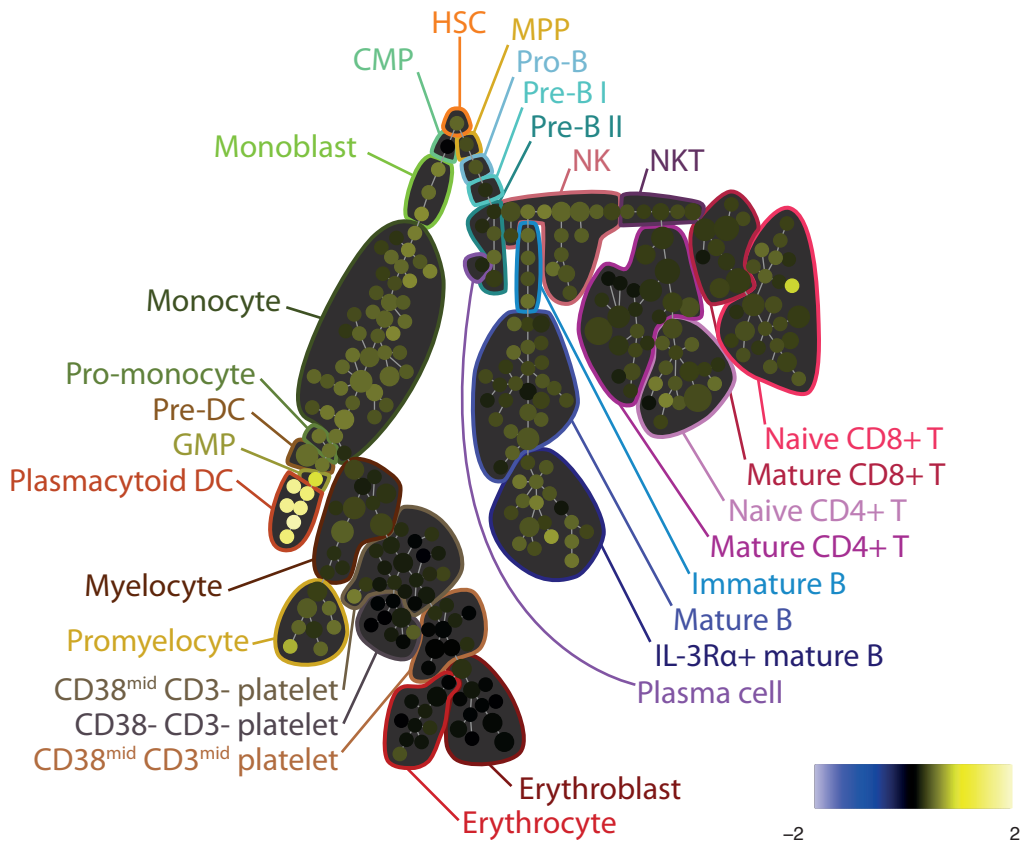

Figure S8A

169-pP38 ---- IL7 vs Ref Ratio

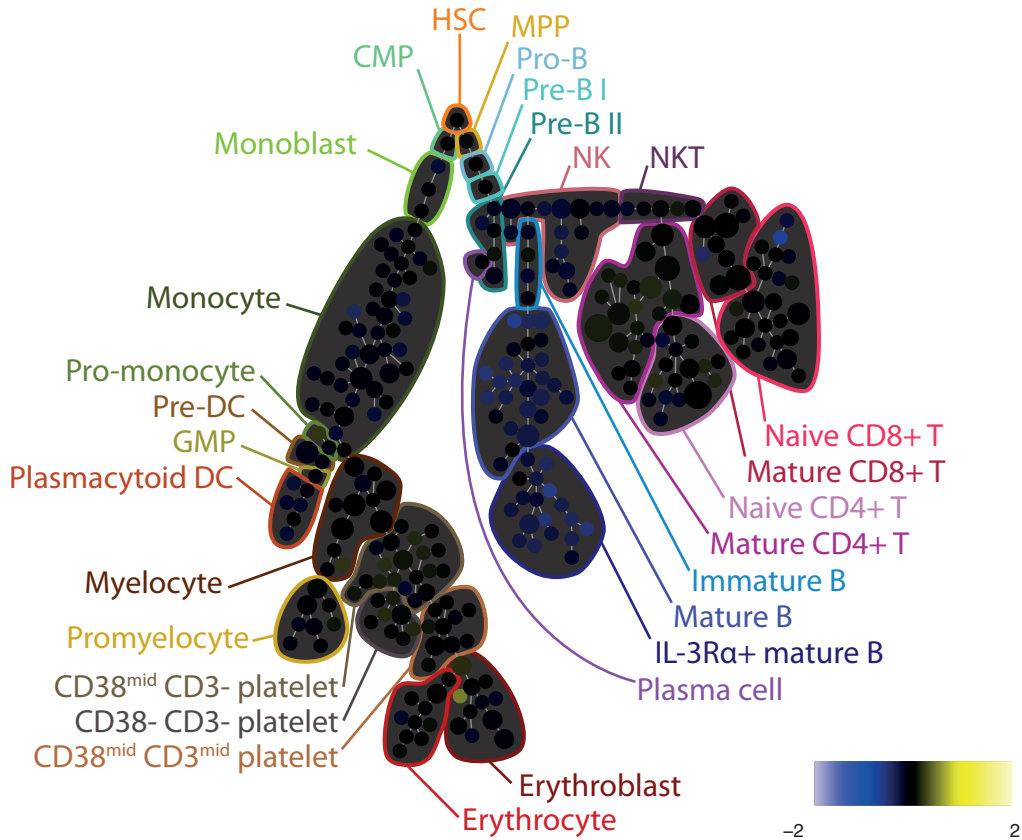



Figure S8A

169-pP38 ---- LPS vs Ref Ratio

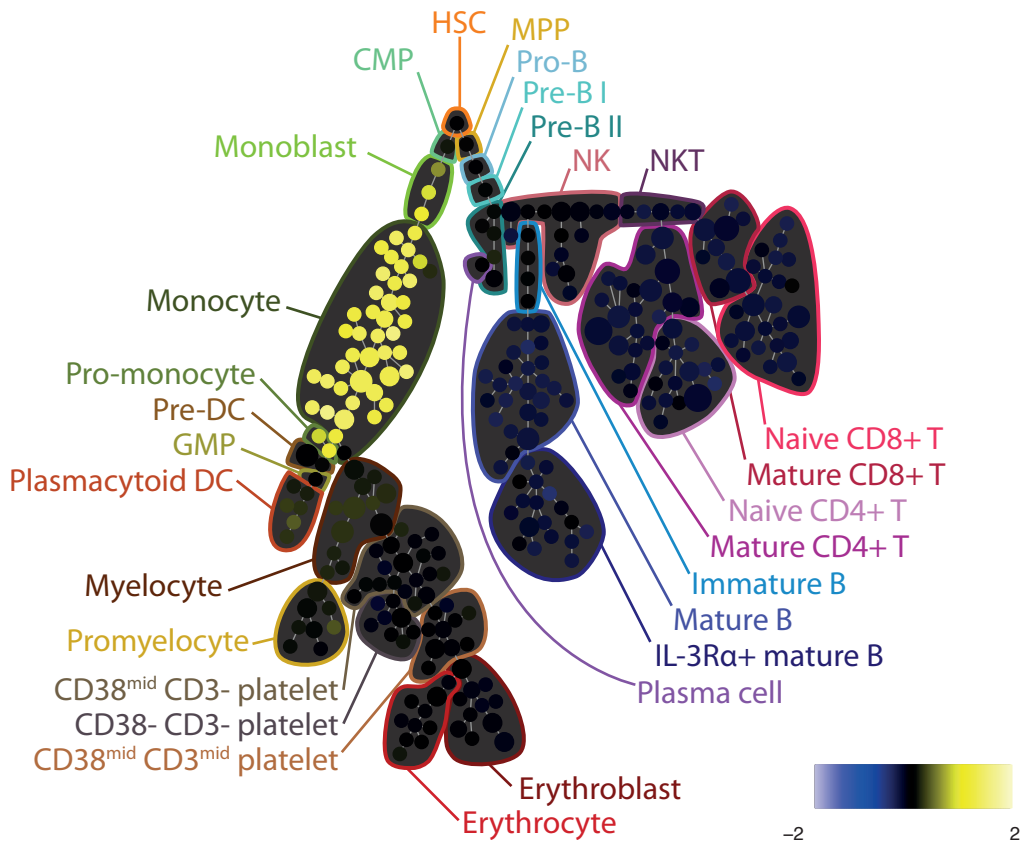

Figure S8A

169-pP38 ---- PMAiono vs Ref Ratio

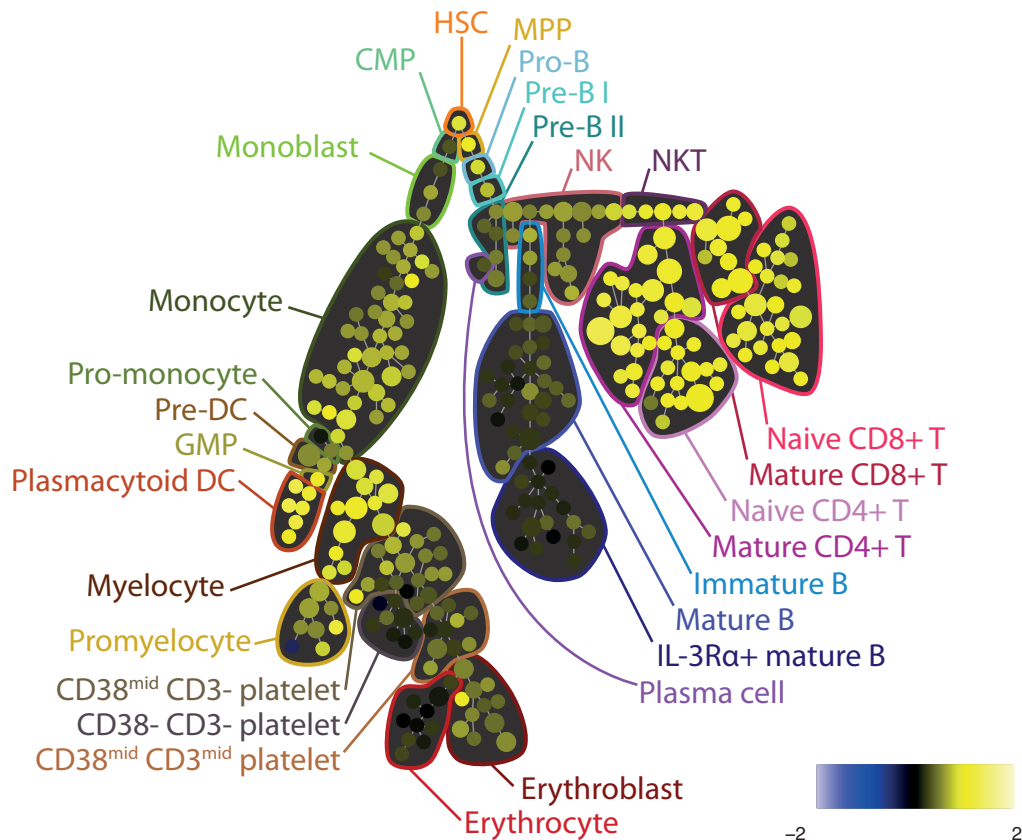

Figure S8A

169-pP38 ---- PVO4 vs Ref Ratio

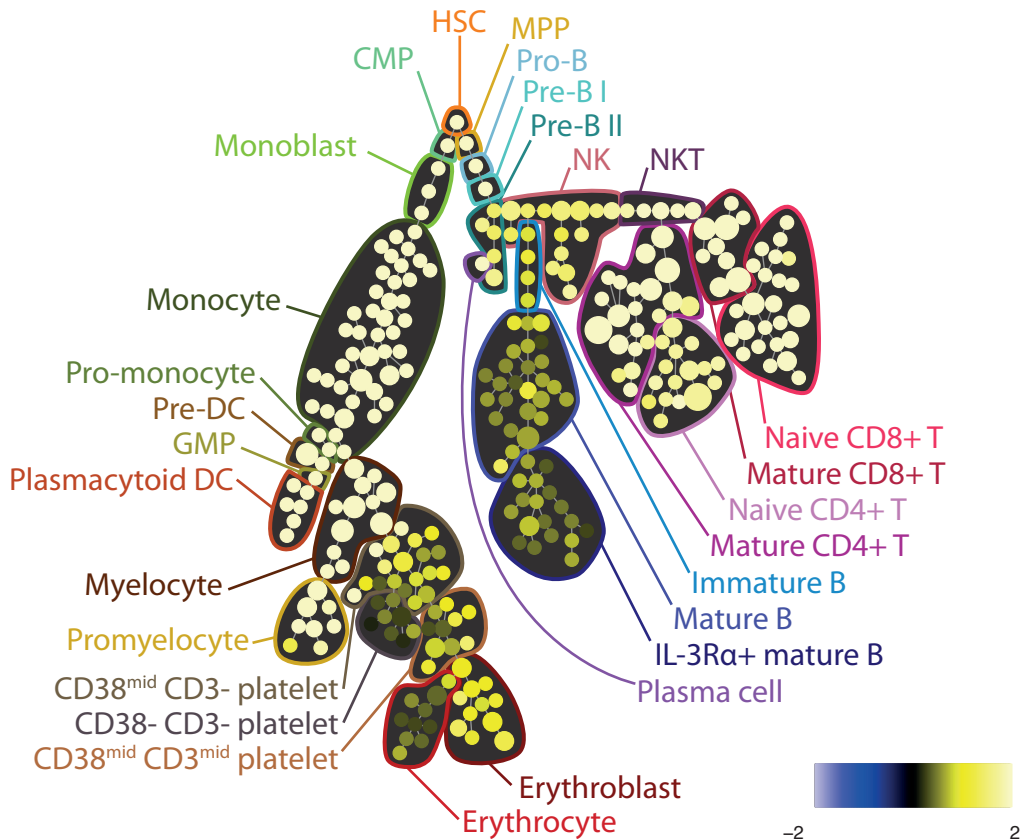

Figure S8A

169-pP38 ---- SCF vs Ref Ratio

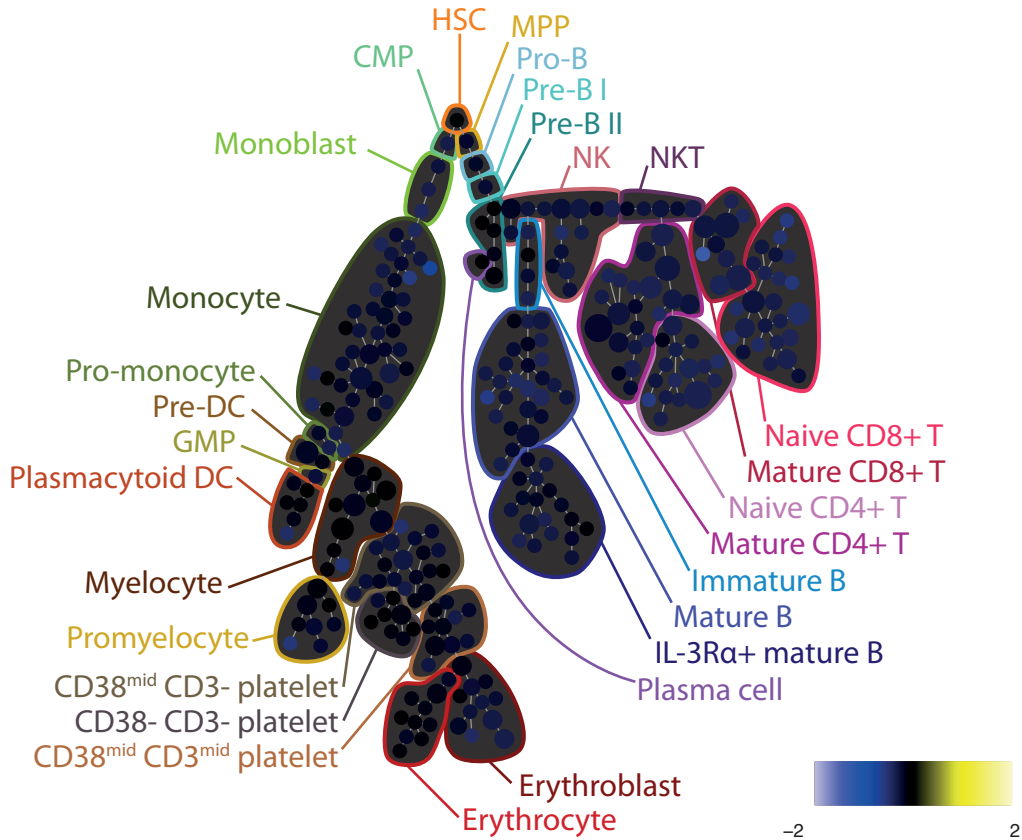

Figure S8A

169-pP38 --- TNFa vs Ref Ratio

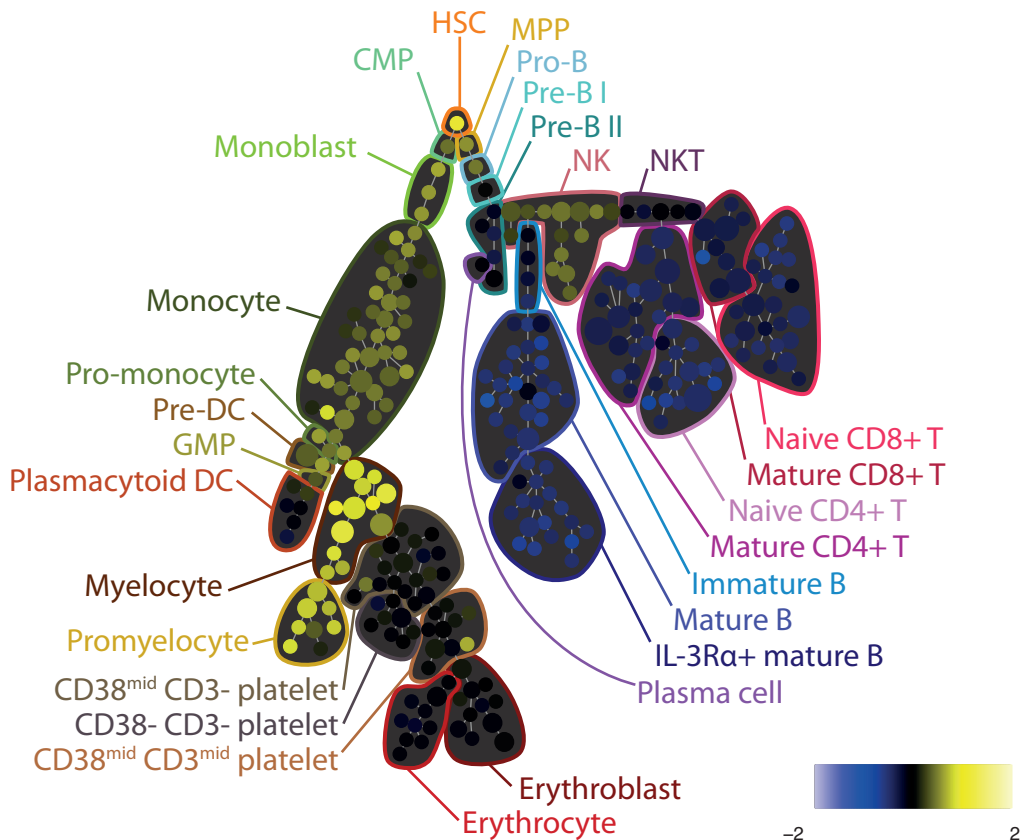

Figure S8A

169-pP38 ---- TPO vs Ref Ratio

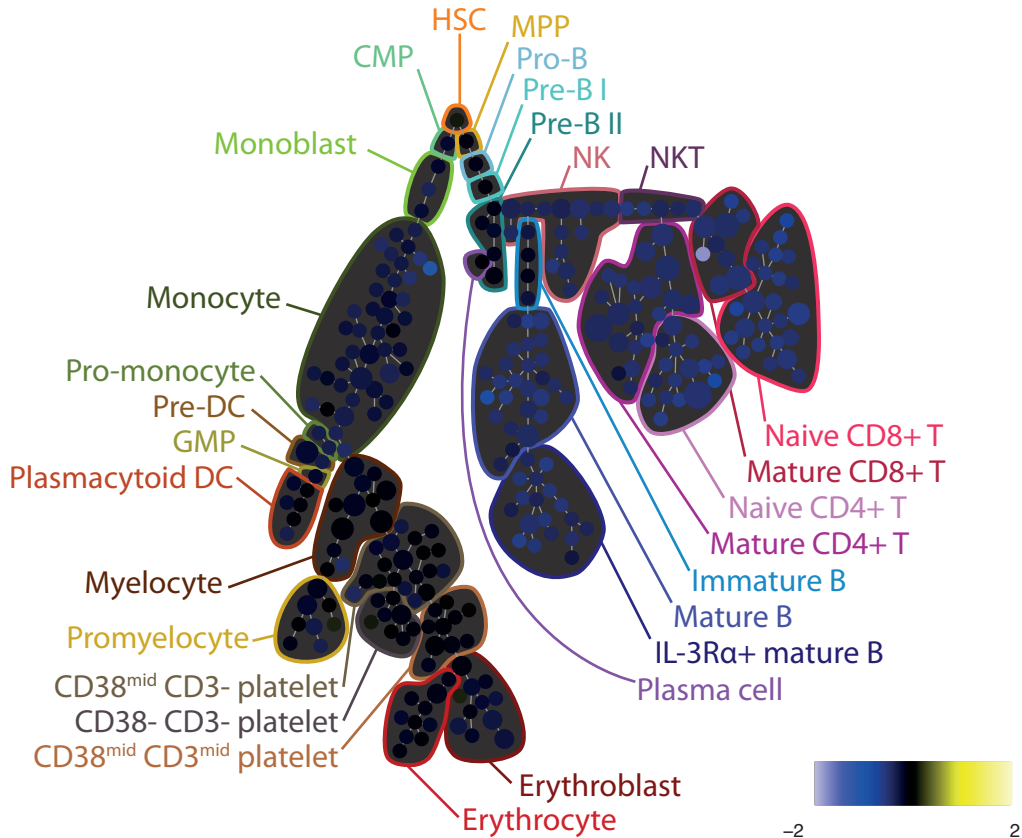

Figure S8A

171-pBtk/Itk ---- BCR vs Ref Ratio

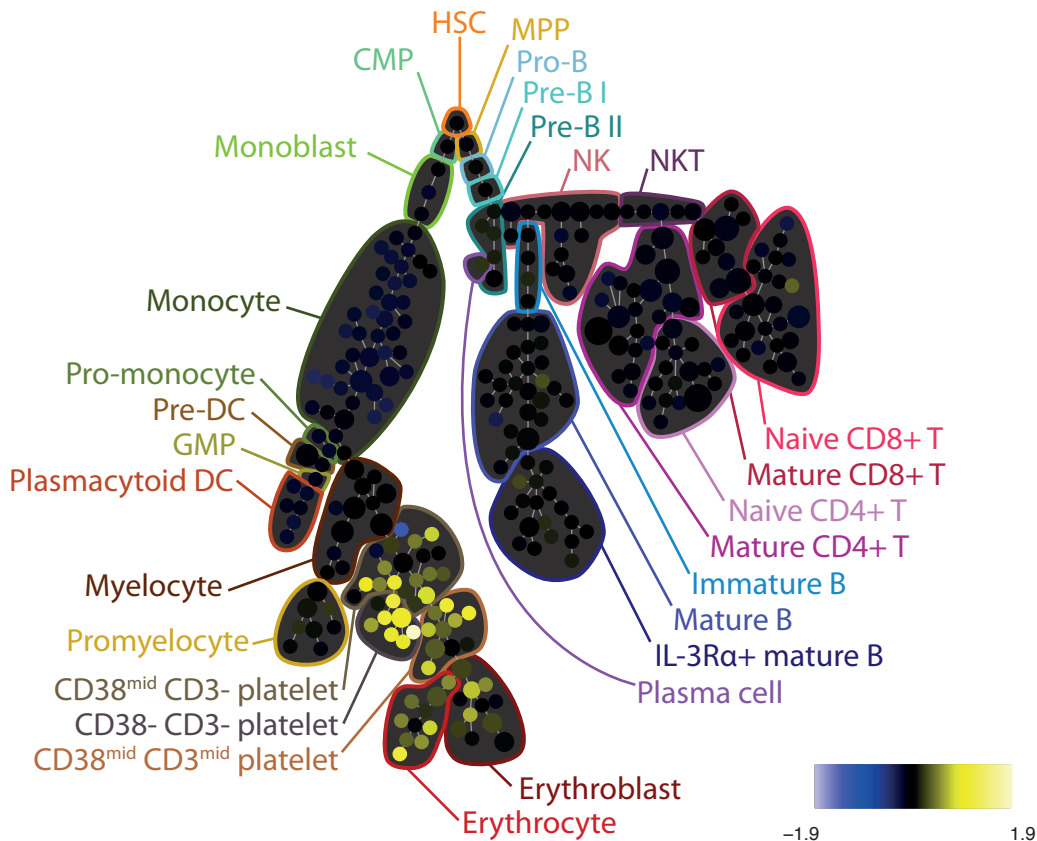

Figure S8A

171-pBtk/Itk ---- DMSO vs Ref Ratio

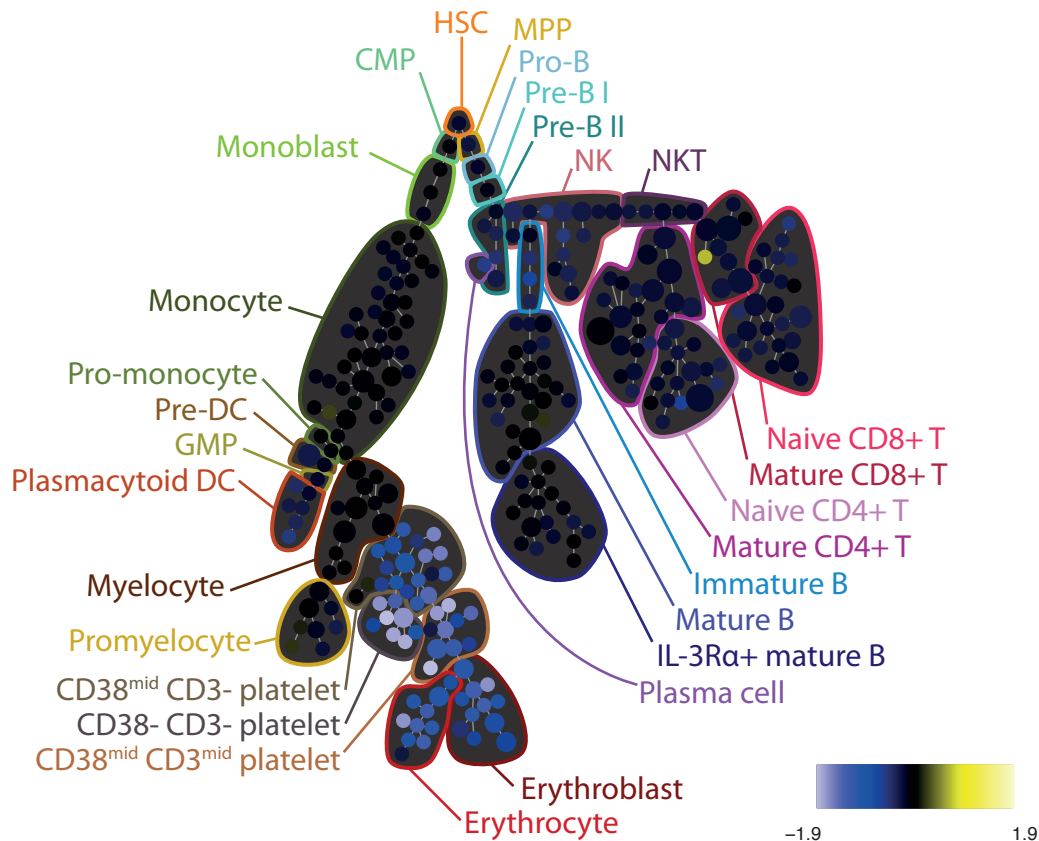



Figure S8A

171-pBtk/Itk ---- Flt3L vs Ref Ratio

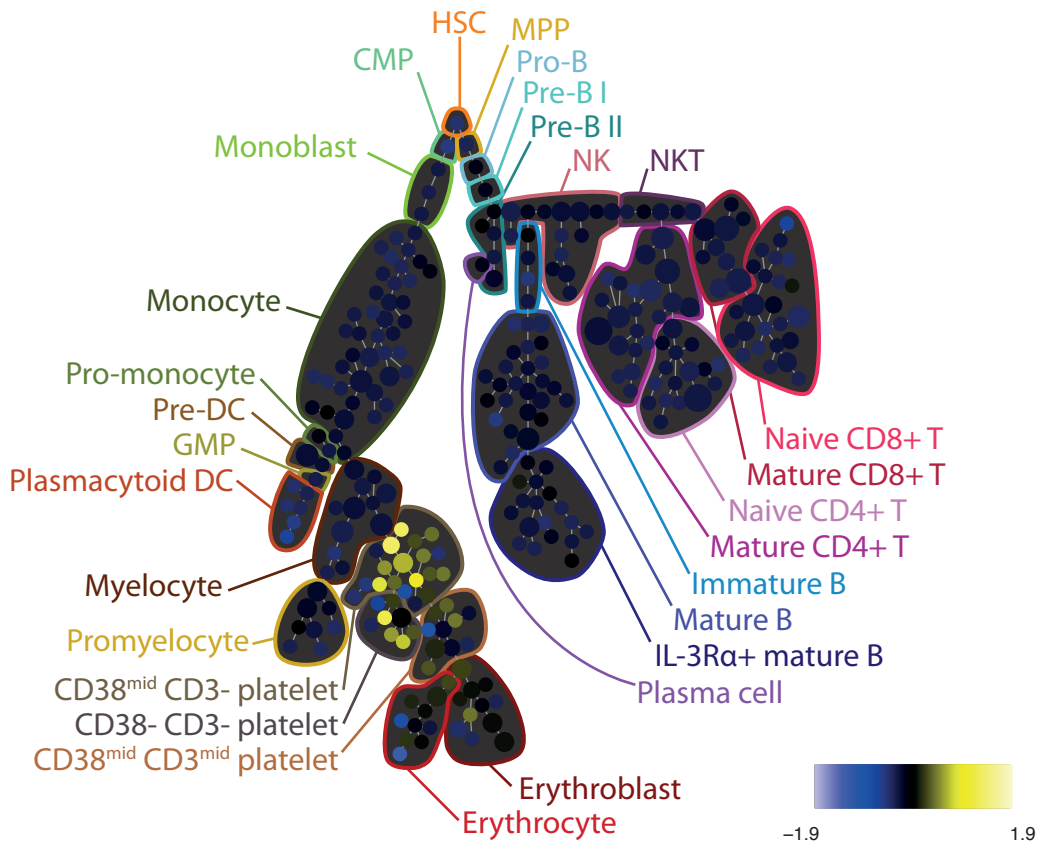

Figure S8A

171-pBtk/Itk ---- GCSF vs Ref Ratio

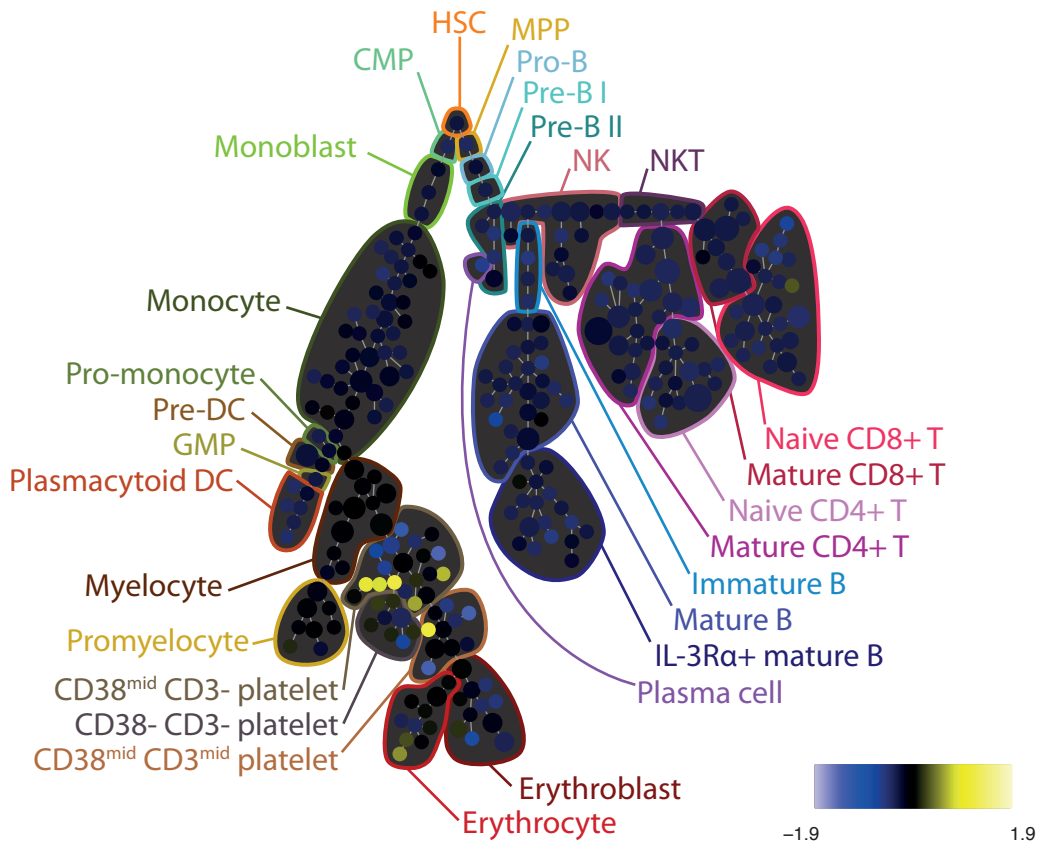

Figure S8A

171-pBtk/Itk ---- GMCSF vs Ref Ratio

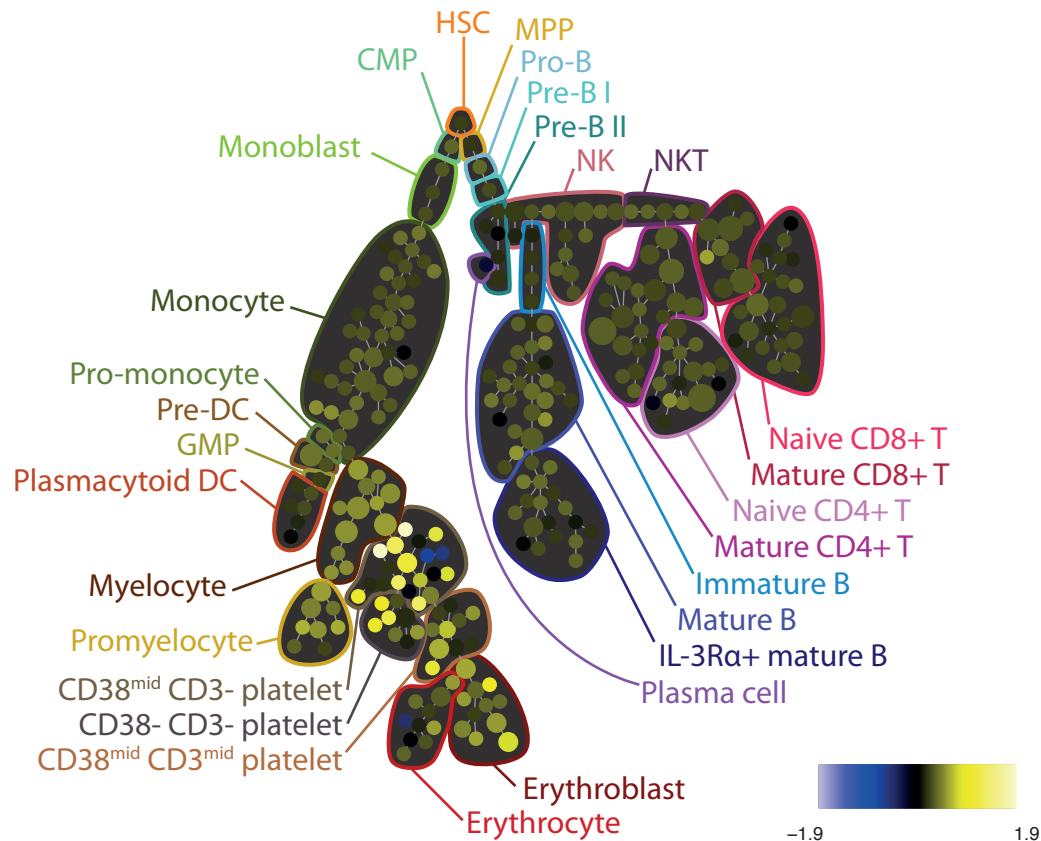

Figure S8A

171-pBtk/ltk ---- IFNad vs Ref Ratio

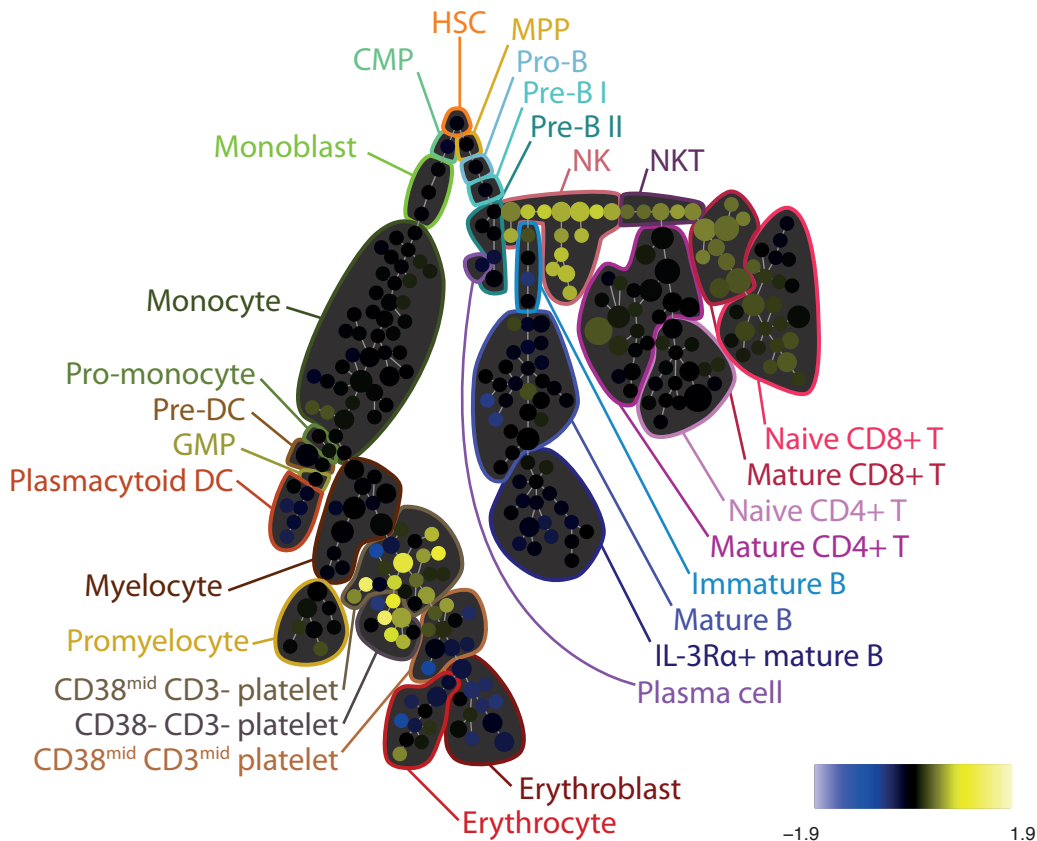

Figure S8A

171-pBtk/Itk — IL3 vs Ref Ratio

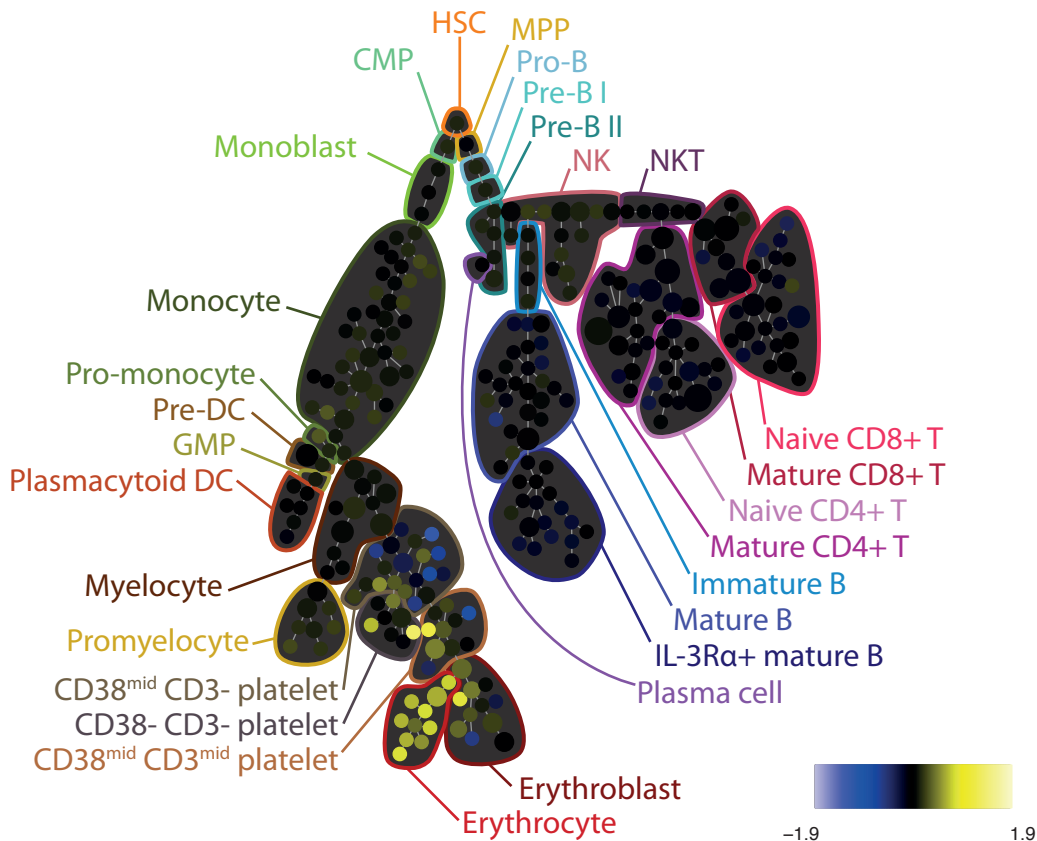

Figure S8A

171-pBtk/Itk — IL7 vs Ref Ratio

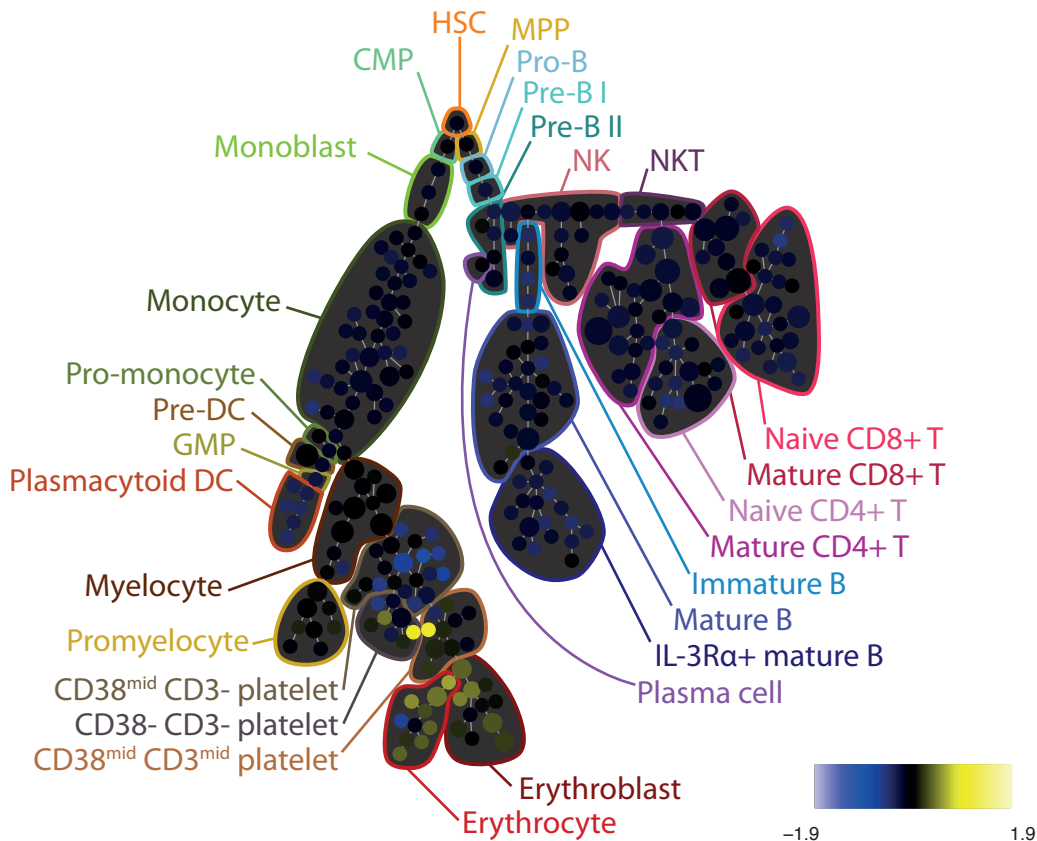

Figure S8A

171-pBtk/Itk ---- LPS vs Ref Ratio

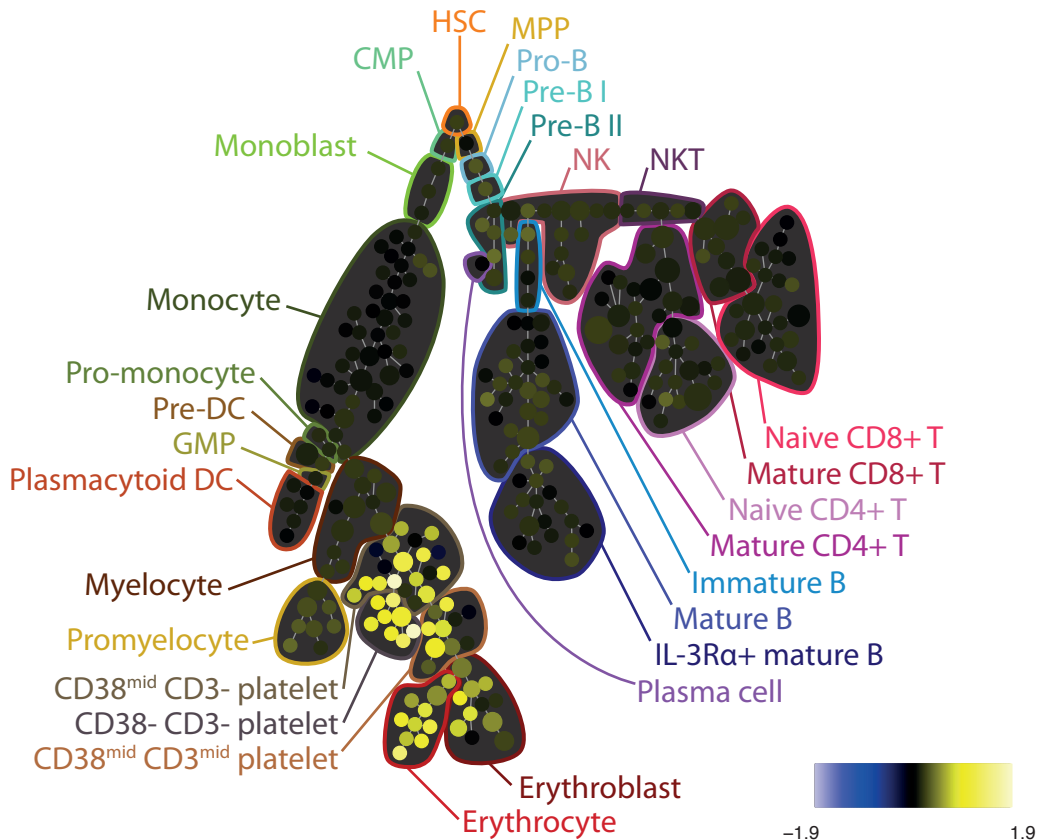

Figure S8A

171-pBtk/Itk ---- PMAiono vs Ref Ratio

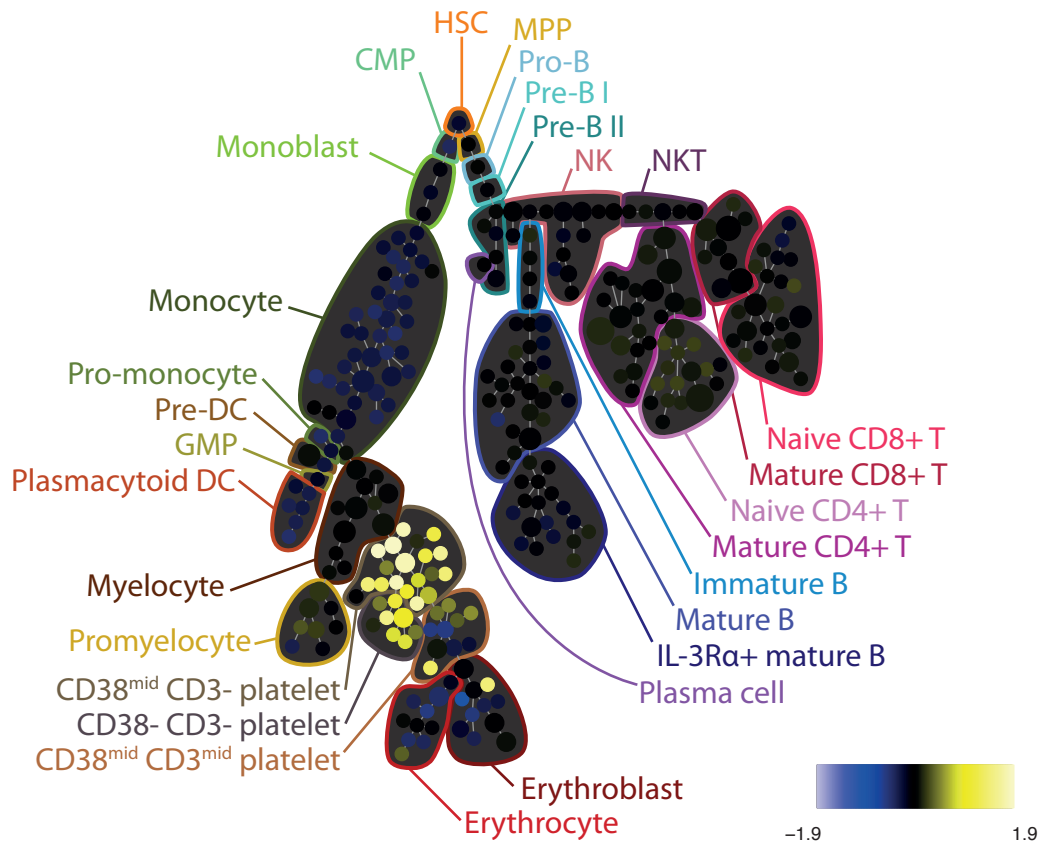



Figure S8A

171-pBtk/Itk — PVO4 vs Ref Ratio

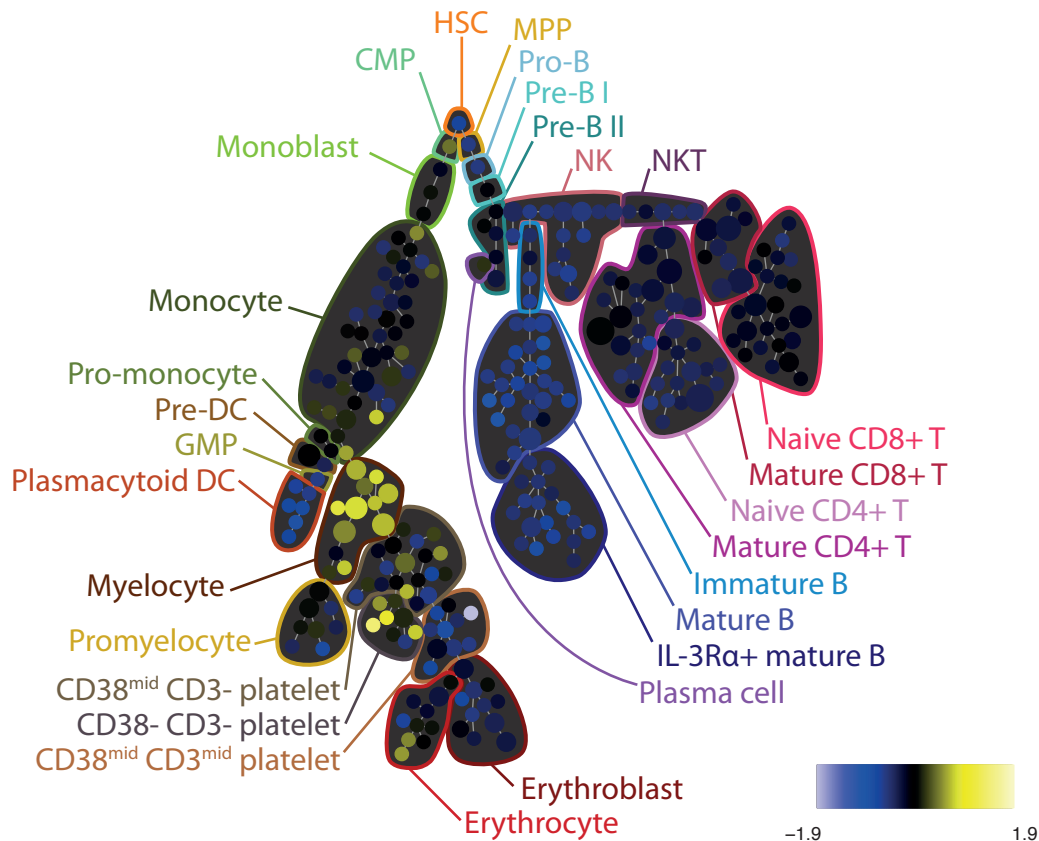

Figure S8A

171-pBtk/Itk ---- SCF vs Ref Ratio

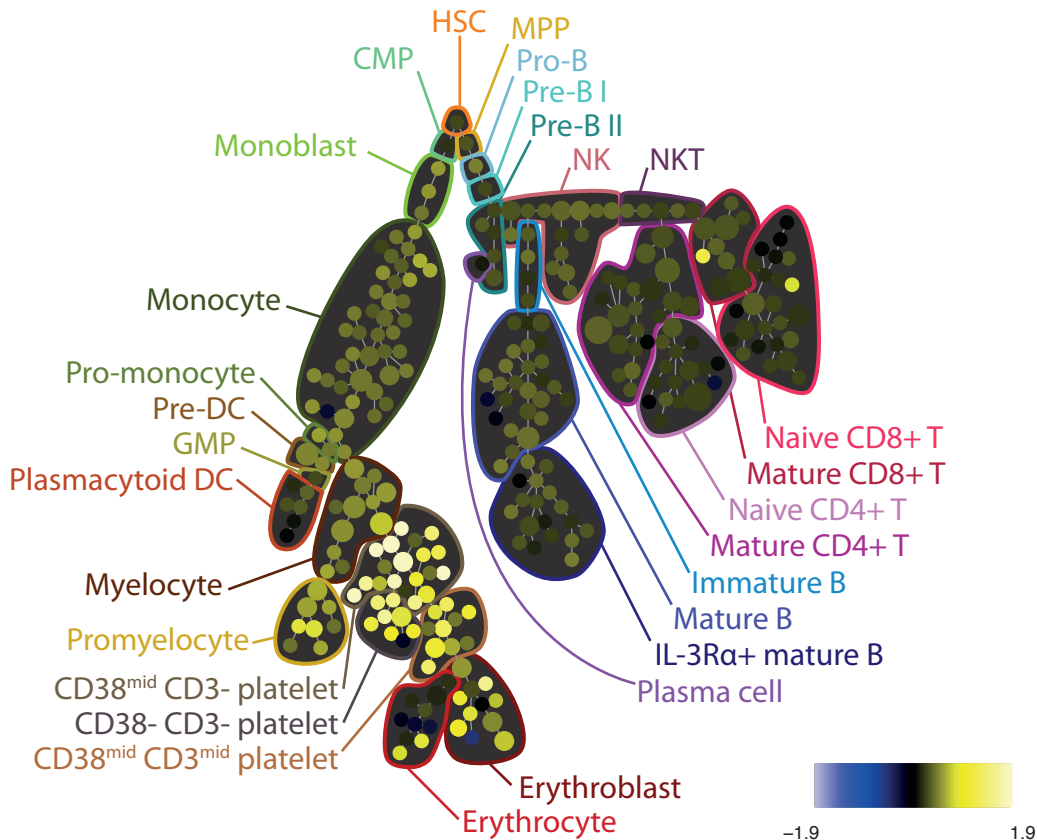

Figure S8A

171-pBtk/Itk ---- TNFa vs Ref Ratio

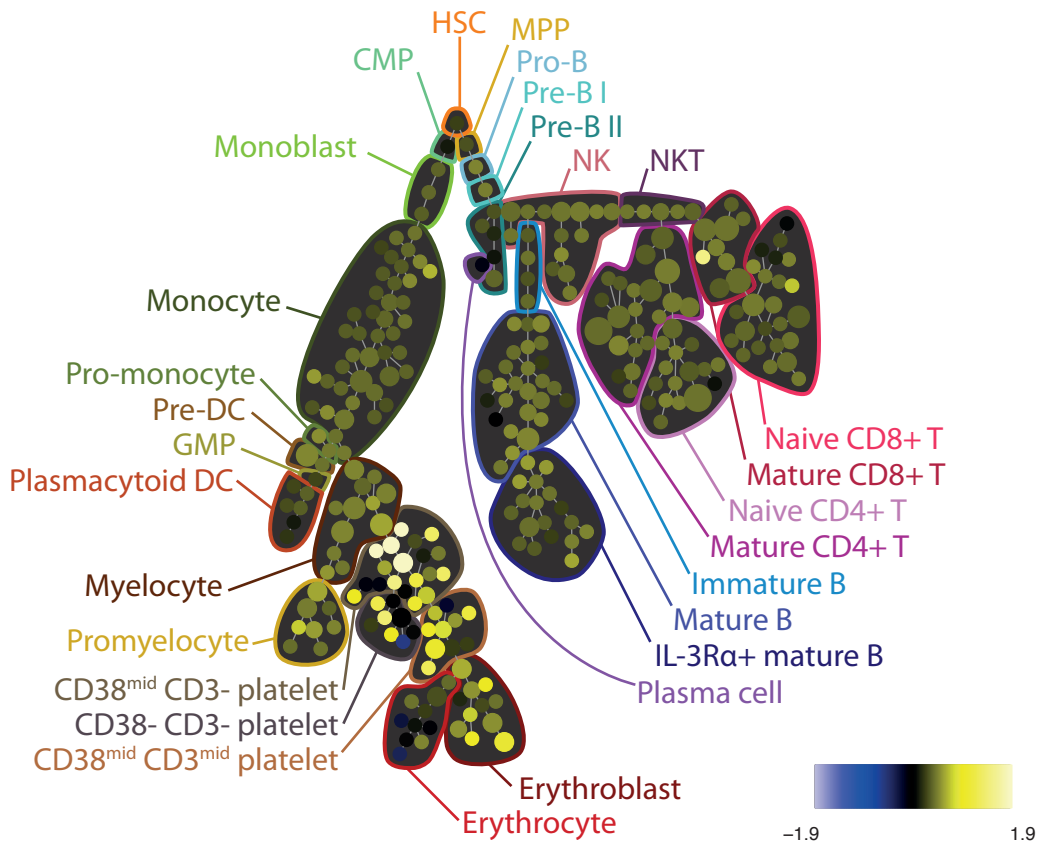

Figure S8A

171-pBtk/Itk ---- TPO vs Ref Ratio

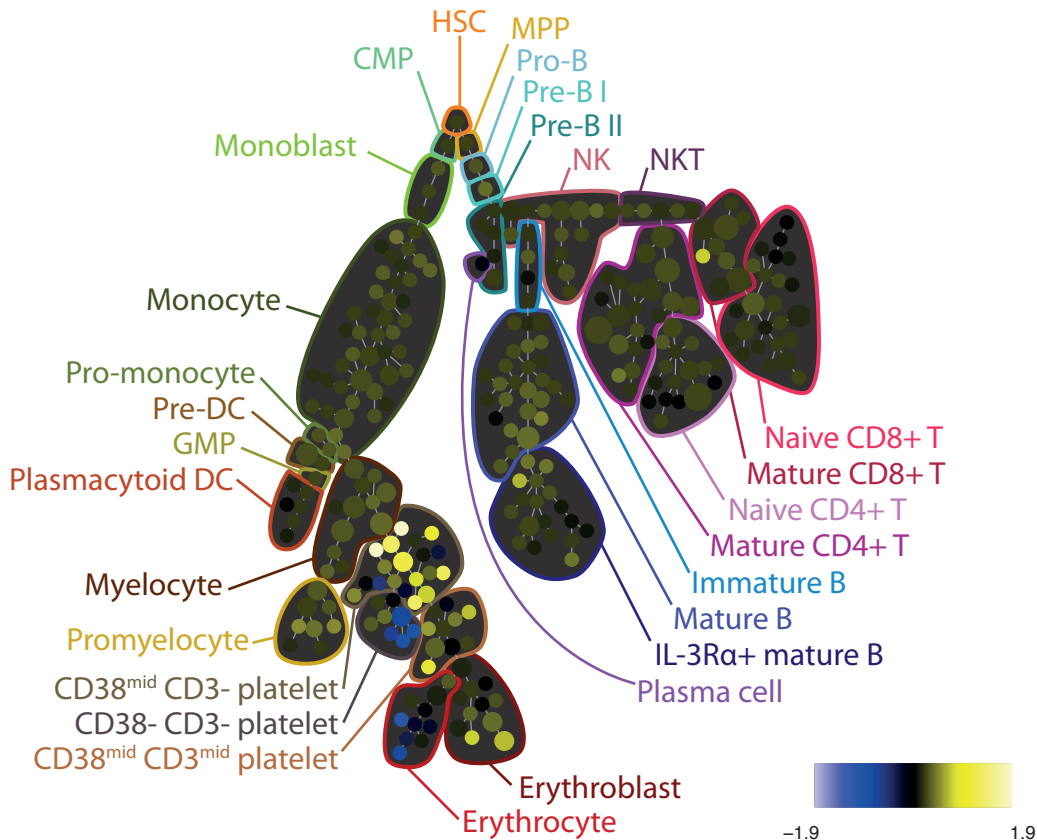

Figure S8A

172-pS6 ---- BCR vs Ref Ratio

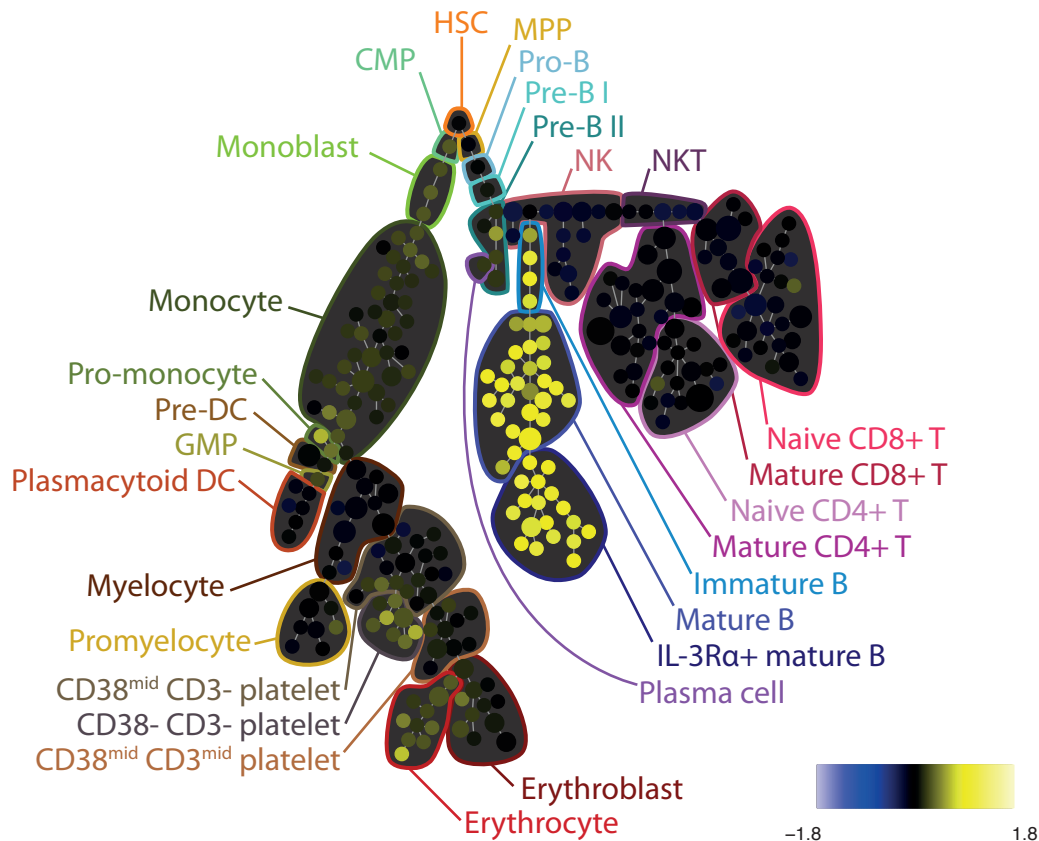

Figure S8A

172-pS6 --- DMSO vs Ref Ratio

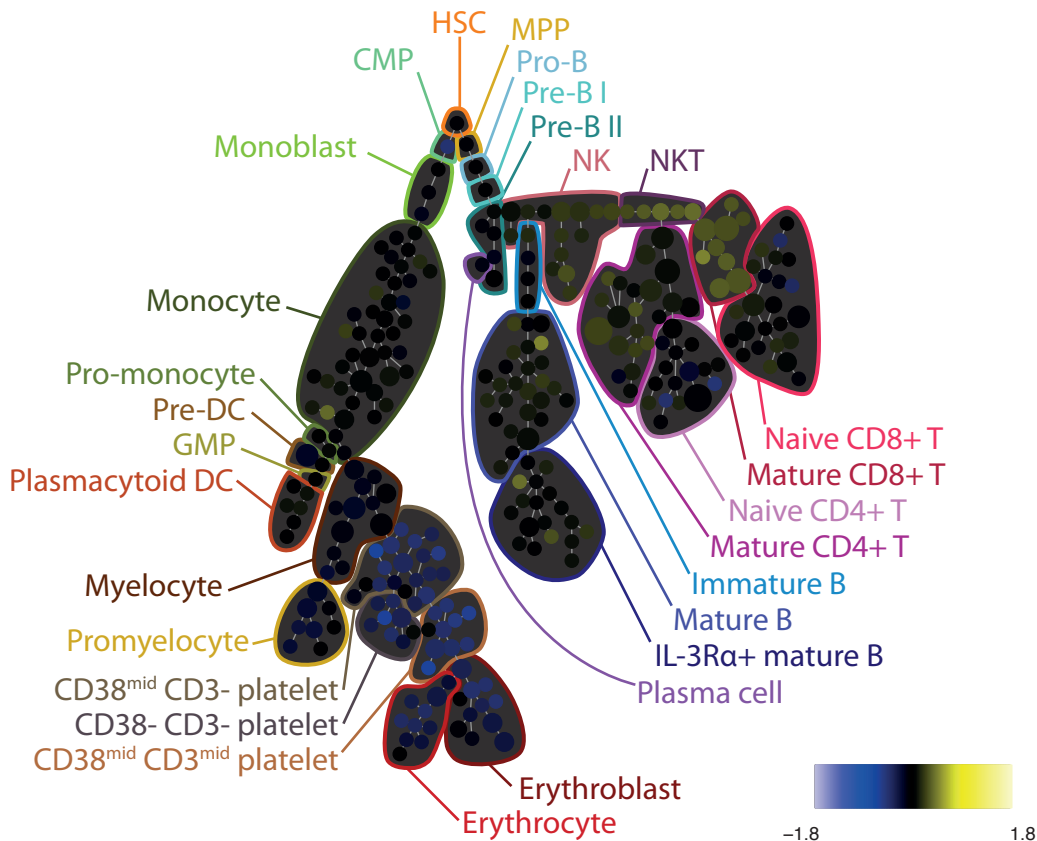

Figure S8A

172-pS6 ---- Flt3L vs Ref Ratio

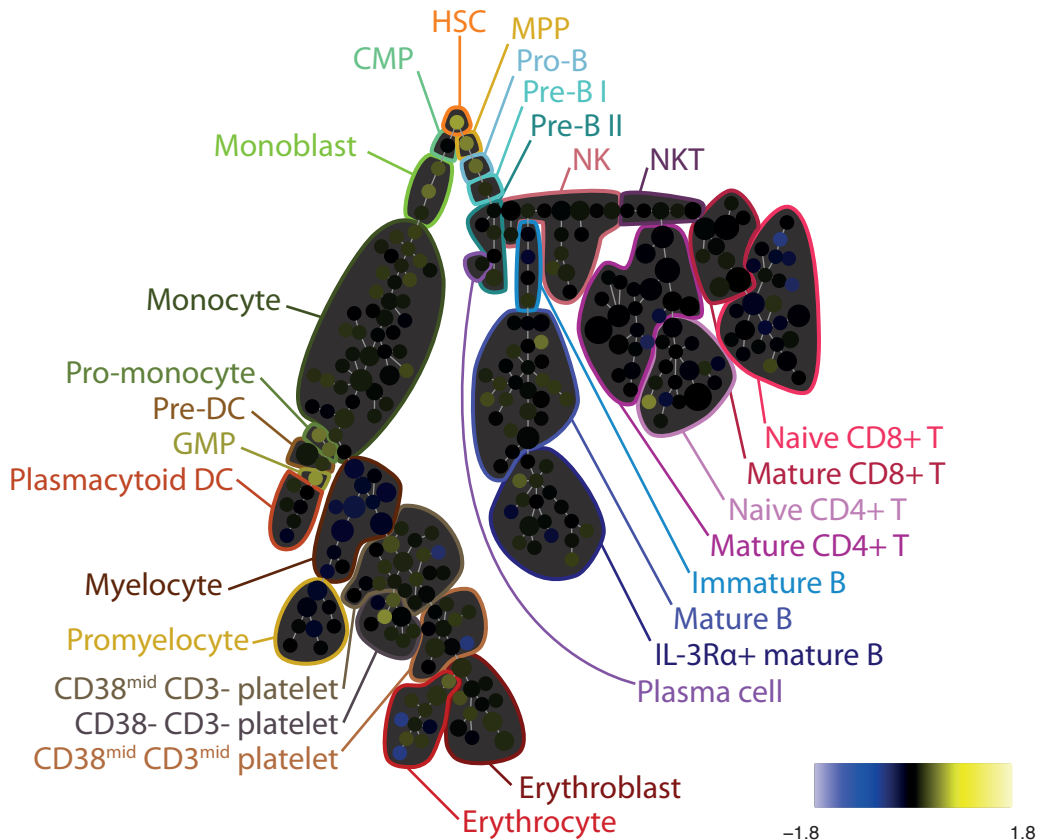

Figure S8A

172-pS6 ---- GCSF vs Ref Ratio

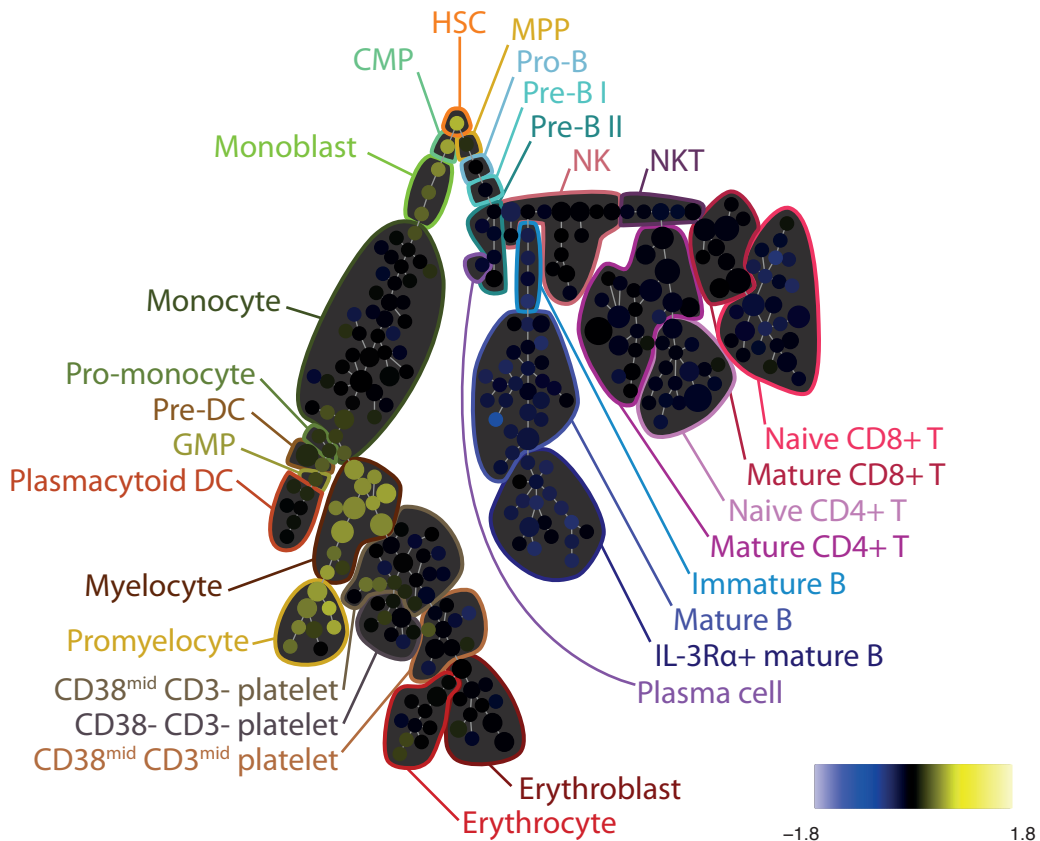



Figure S8A

172-pS6 ---- GMCSF vs Ref Ratio

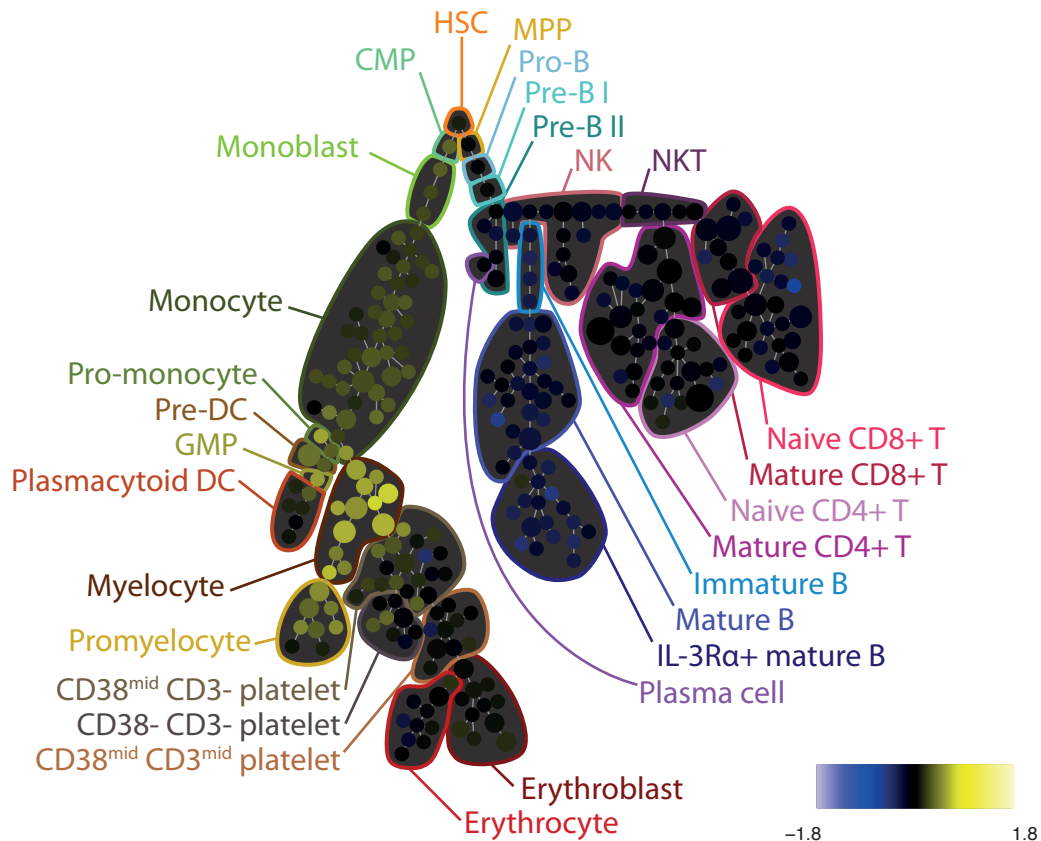

Figure S8A

172-pS6 ---- IFNad vs Ref Ratio

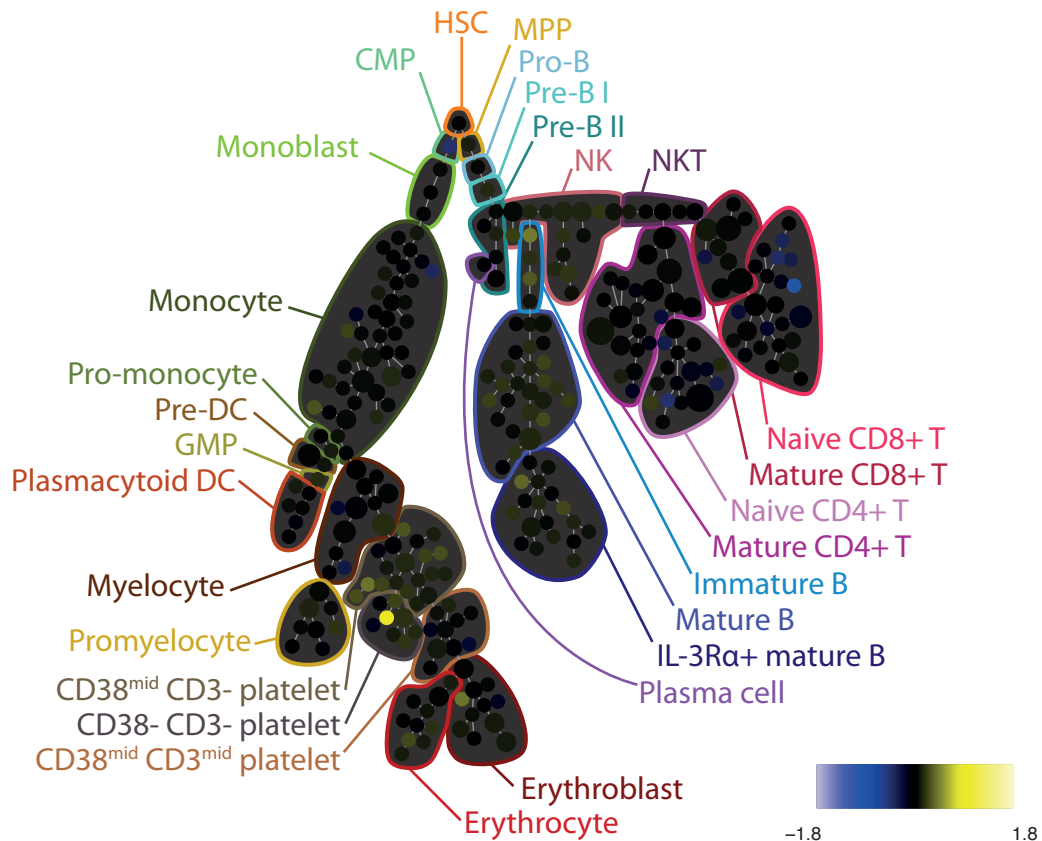

Figure S8A

172-pS6 ---- IL3 vs Ref Ratio

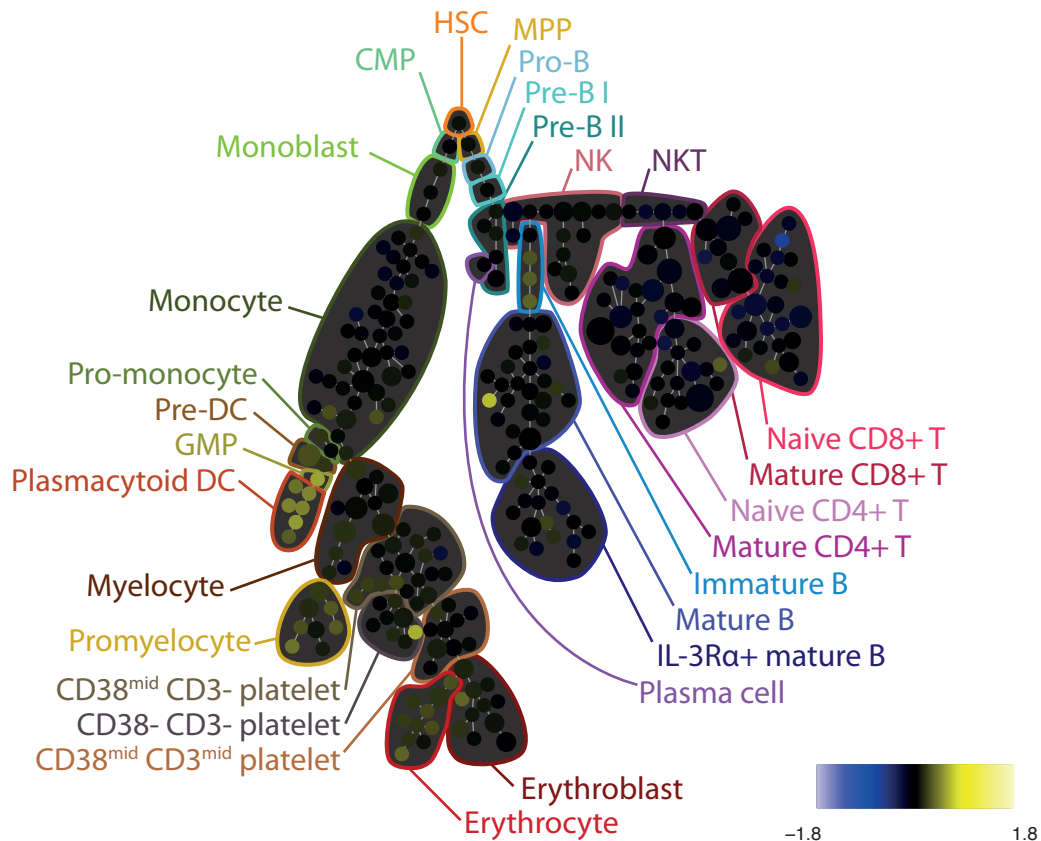

Figure S8A

172-pS6 ---- IL7 vs Ref Ratio

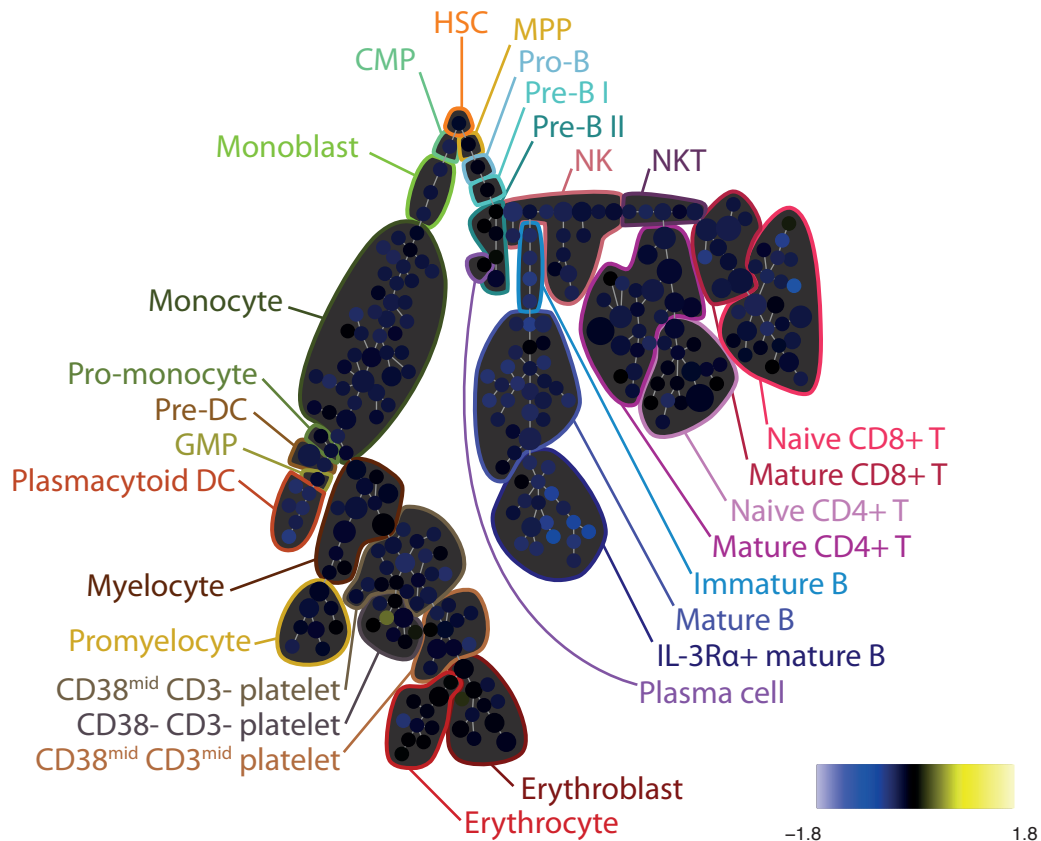

Figure S8A

172-pS6 --- LPS vs Ref Ratio

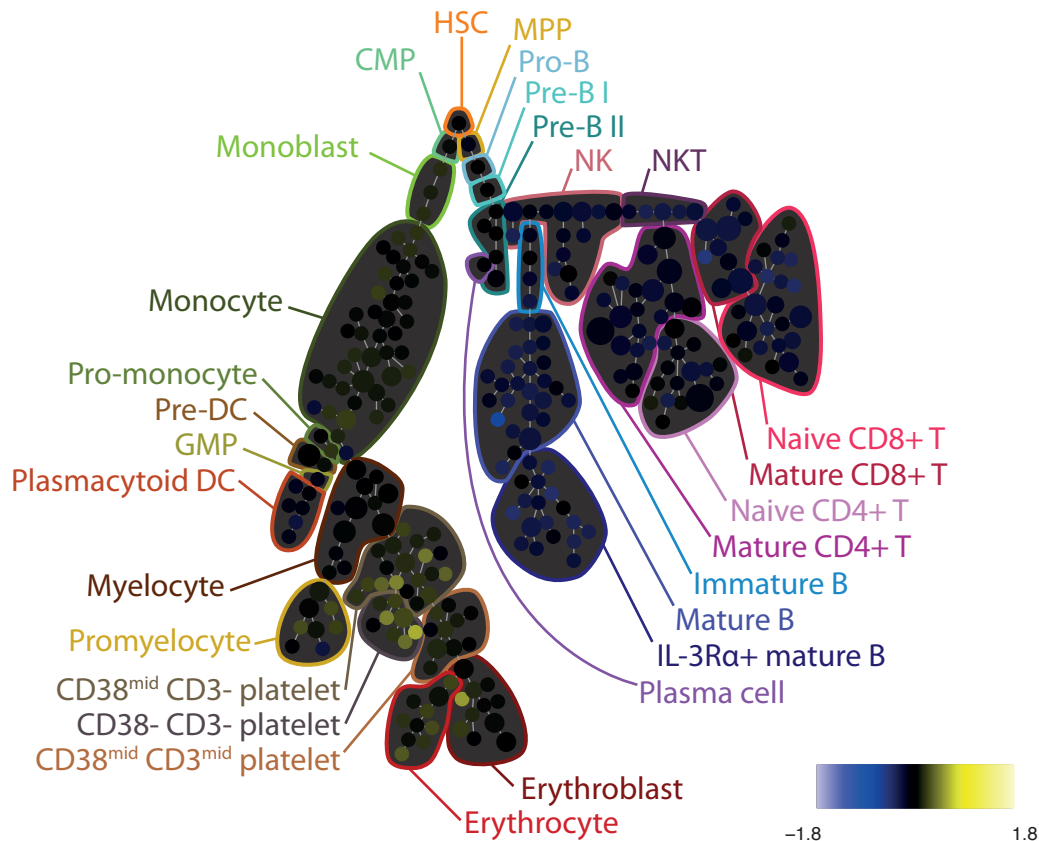

Figure S8A

172-pS6 ---- PMAiono vs Ref Ratio

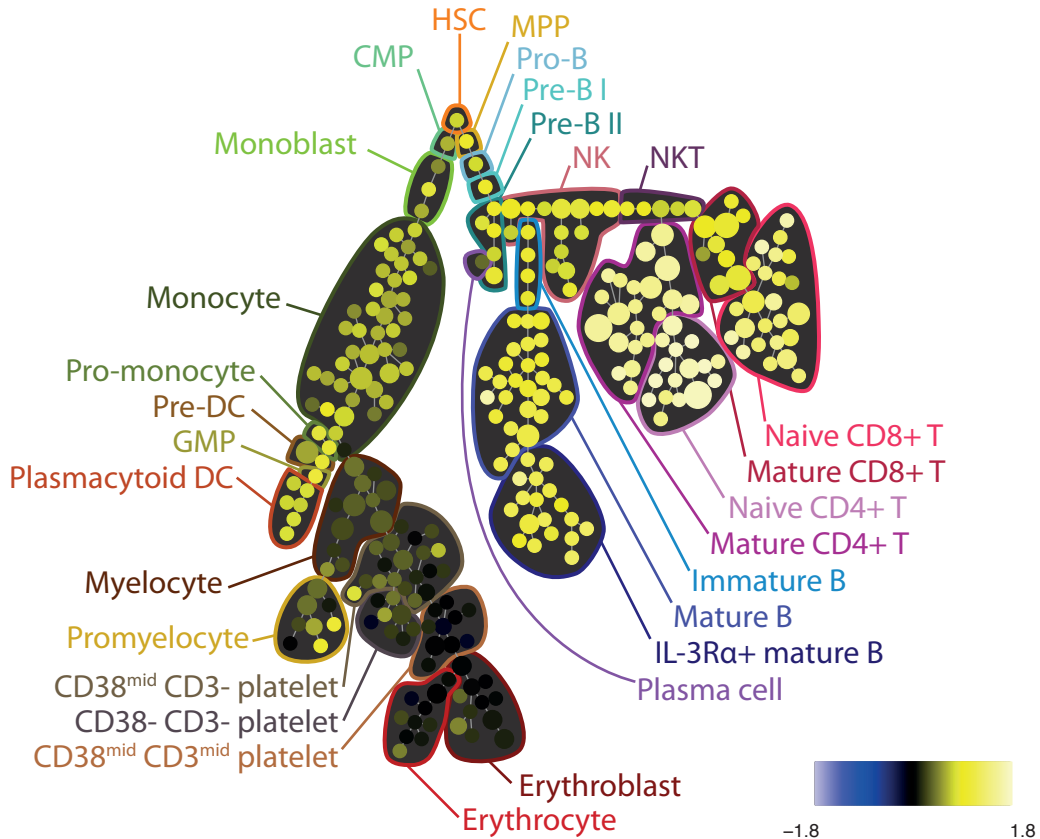

Figure S8A

172-pS6 ---- PVO4 vs Ref Ratio

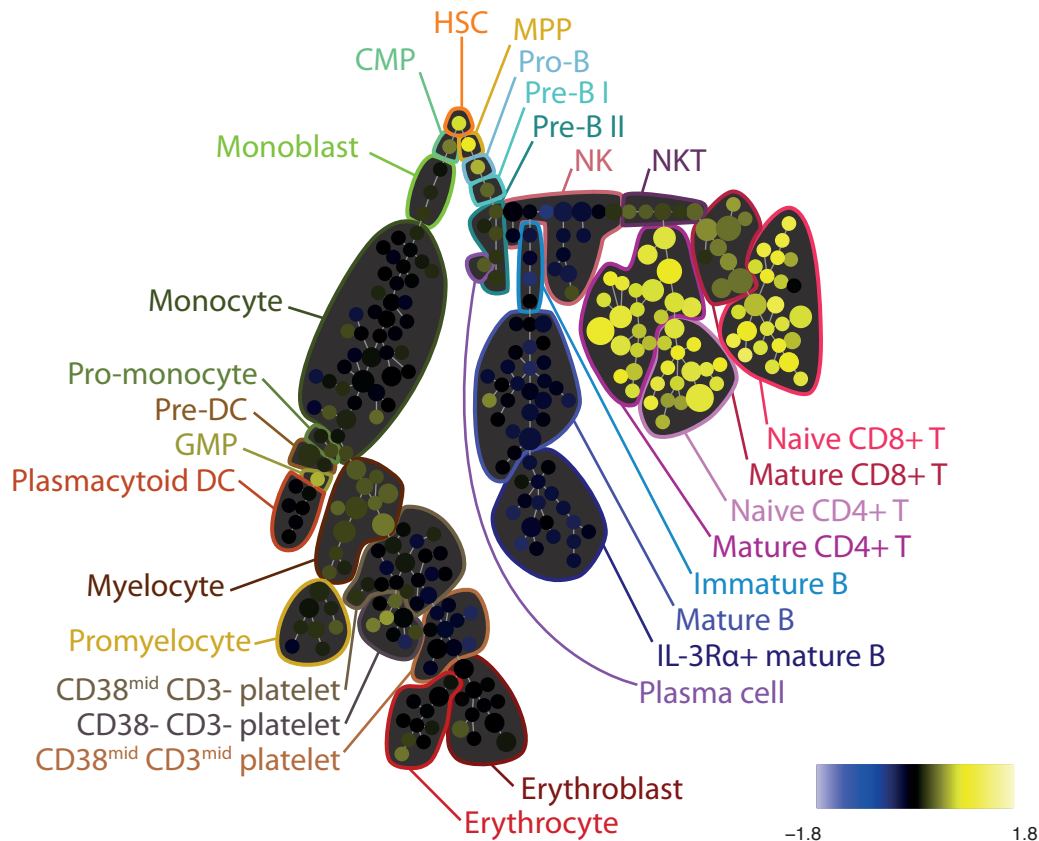

Figure S8A

172-pS6 ---- SCF vs Ref Ratio

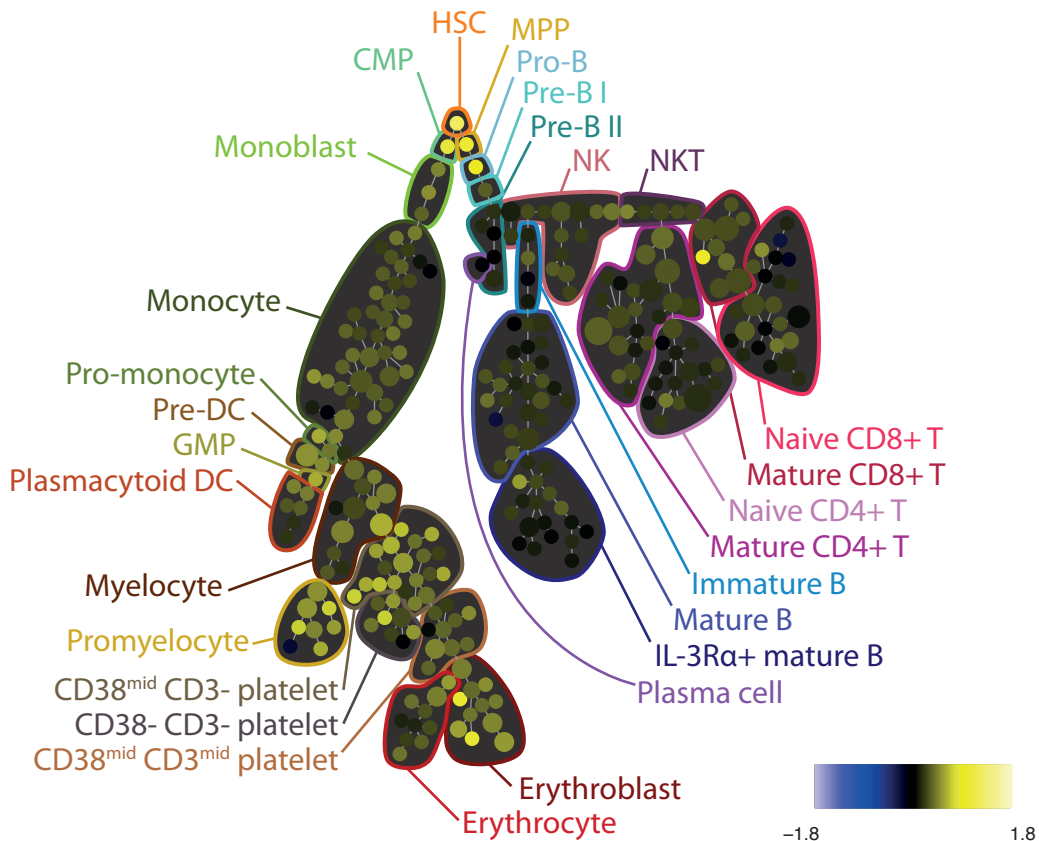



Figure S8A

172-pS6 ---- TNFa vs Ref Ratio

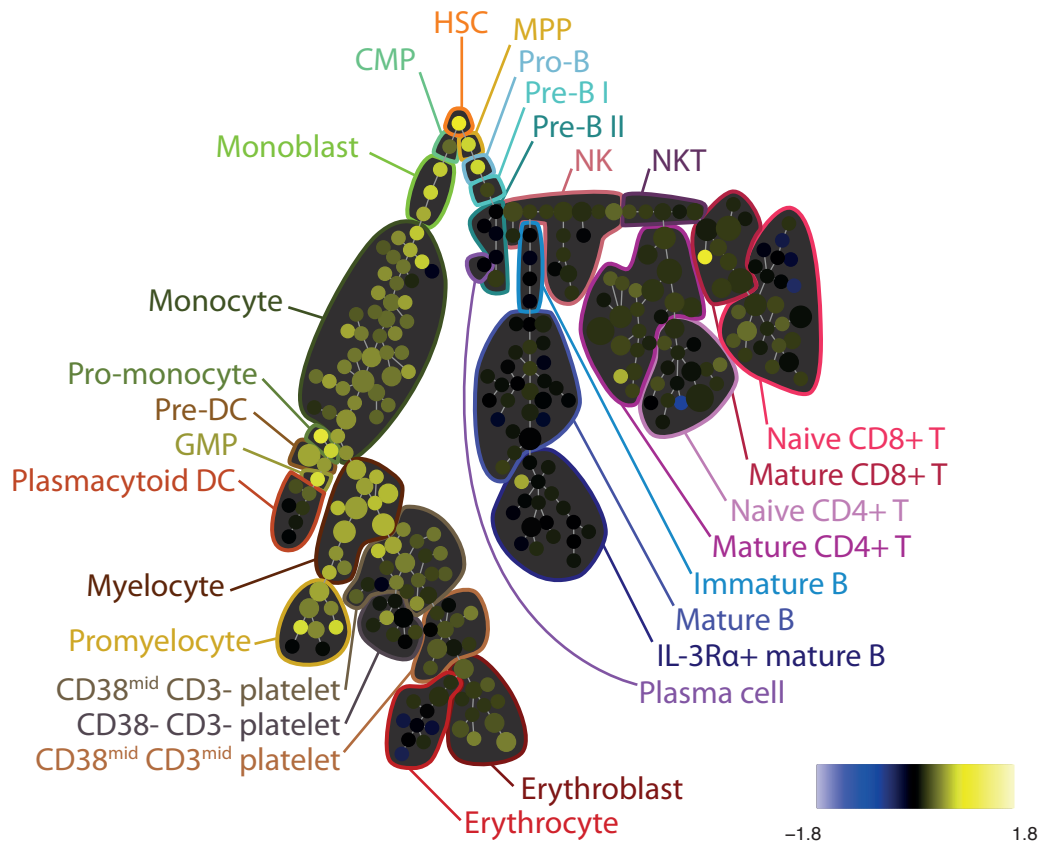

Figure S8A

172-pS6 --- TPO vs Ref Ratio

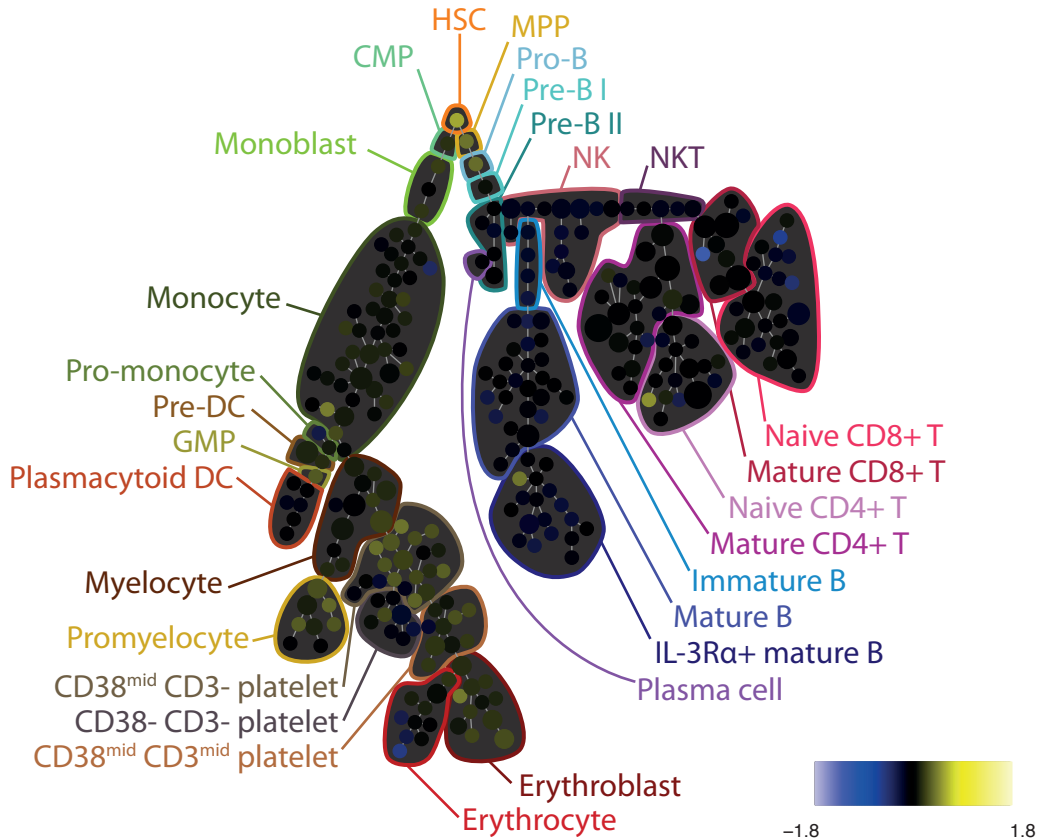

Figure S8A

174-pSrcFK ---- BCR vs Ref Ratio

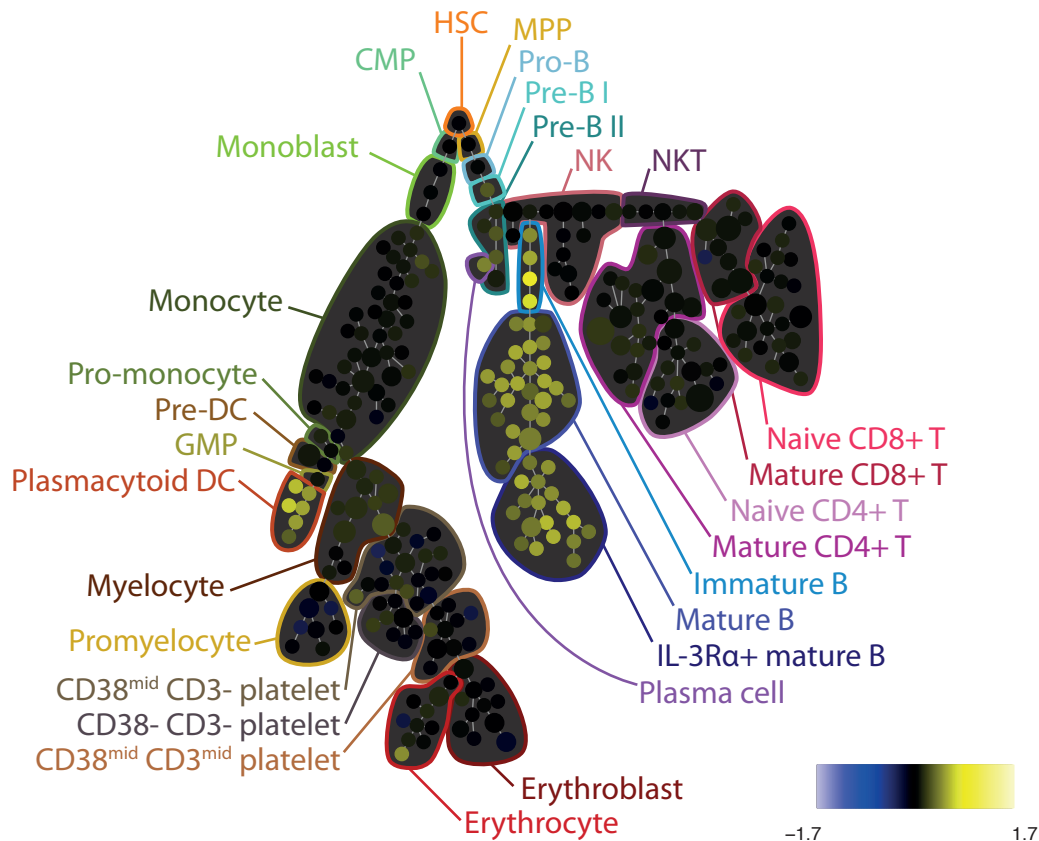

Figure S8A

174-pSrcFK ---- DMSO vs Ref Ratio

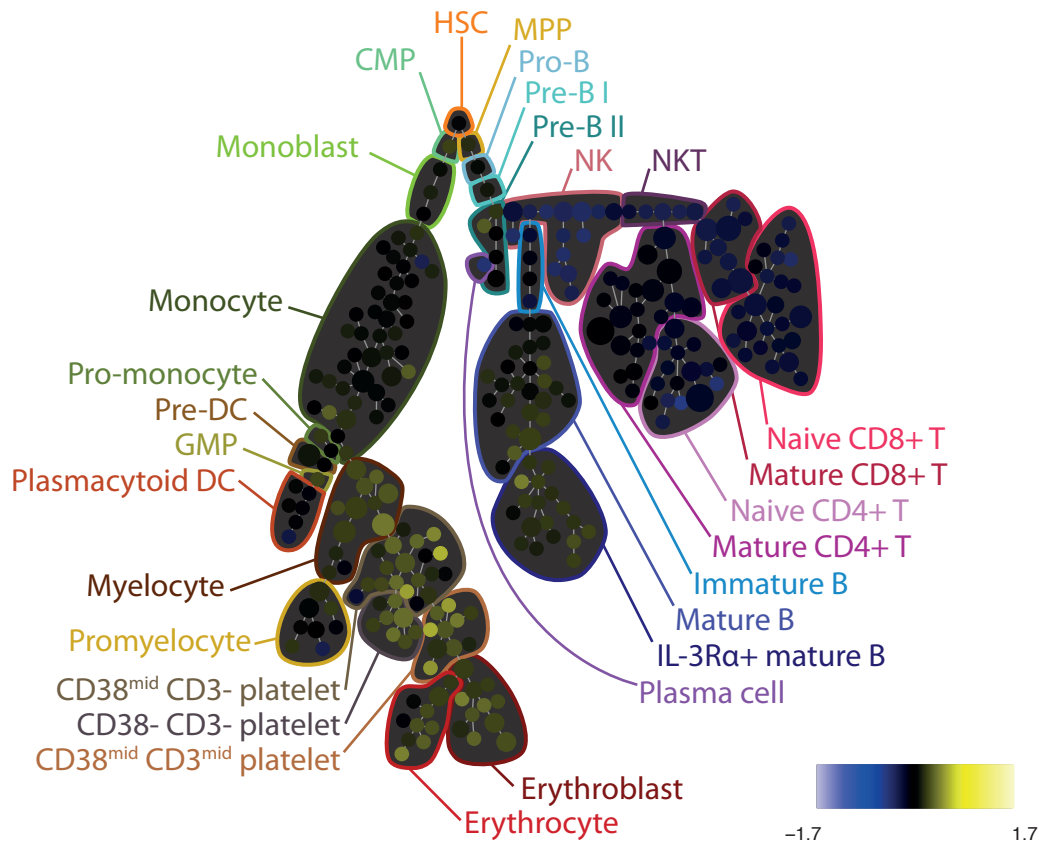

Figure S8A

174-pSrcFK ---- Flt3L vs Ref Ratio

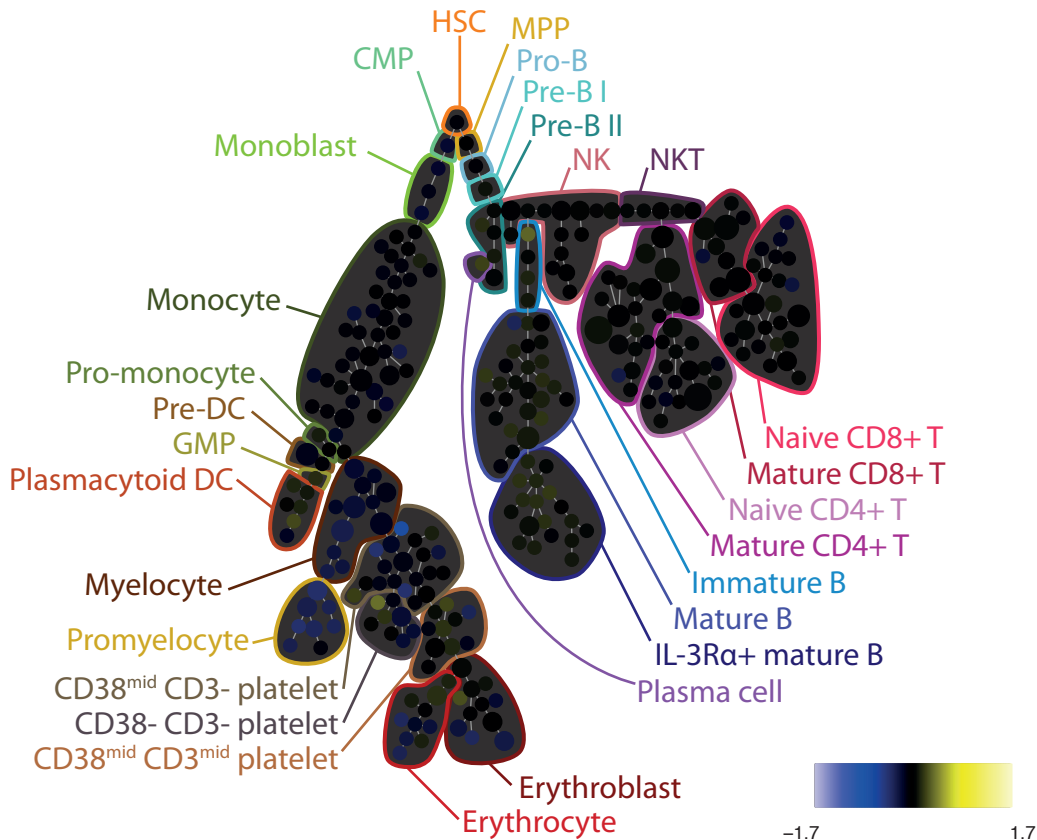

Figure S8A

174-pSrcFK ---- GCSF vs Ref Ratio

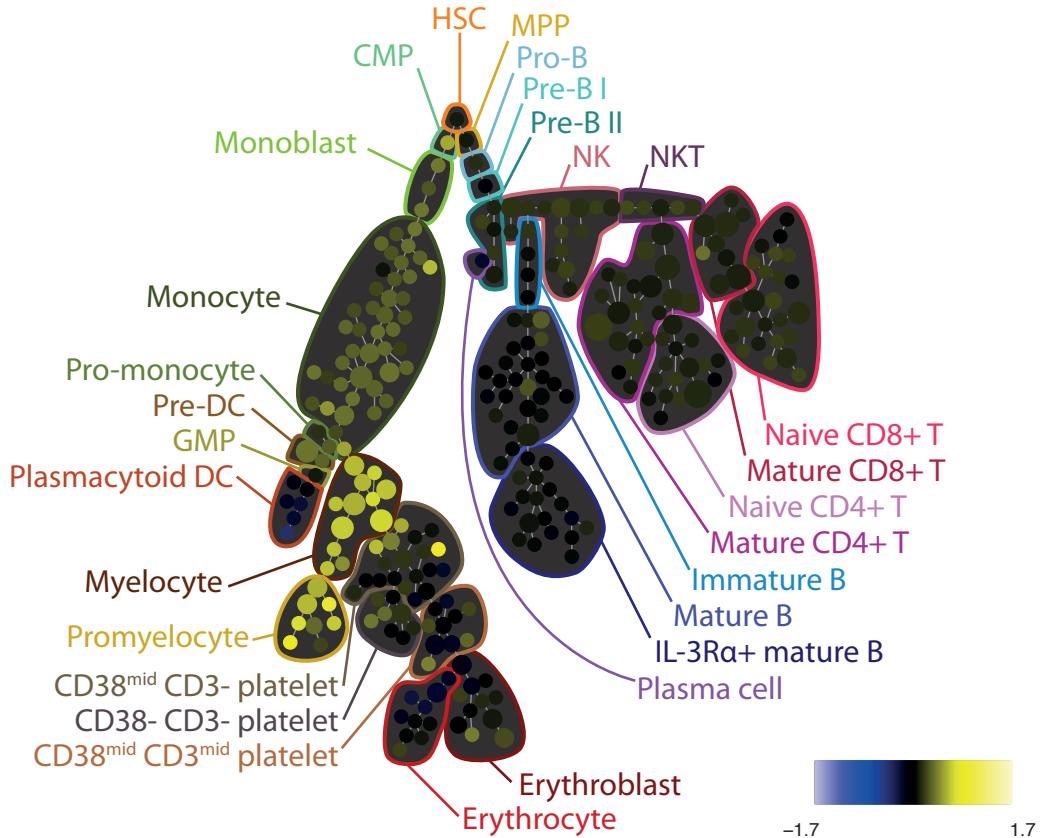

Figure S8A

174-pSrcFK ---- GMCSF vs Ref Ratio

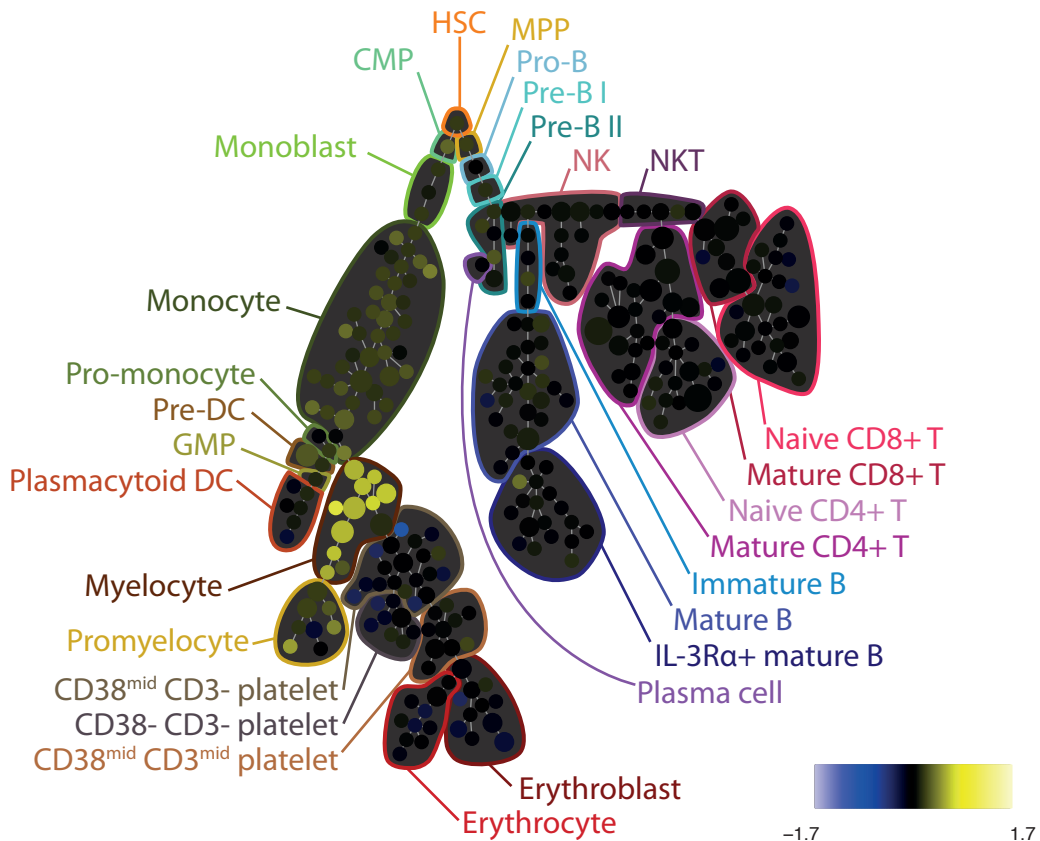

Figure S8A

174-pSrcFK ---- IFNad vs Ref Ratio

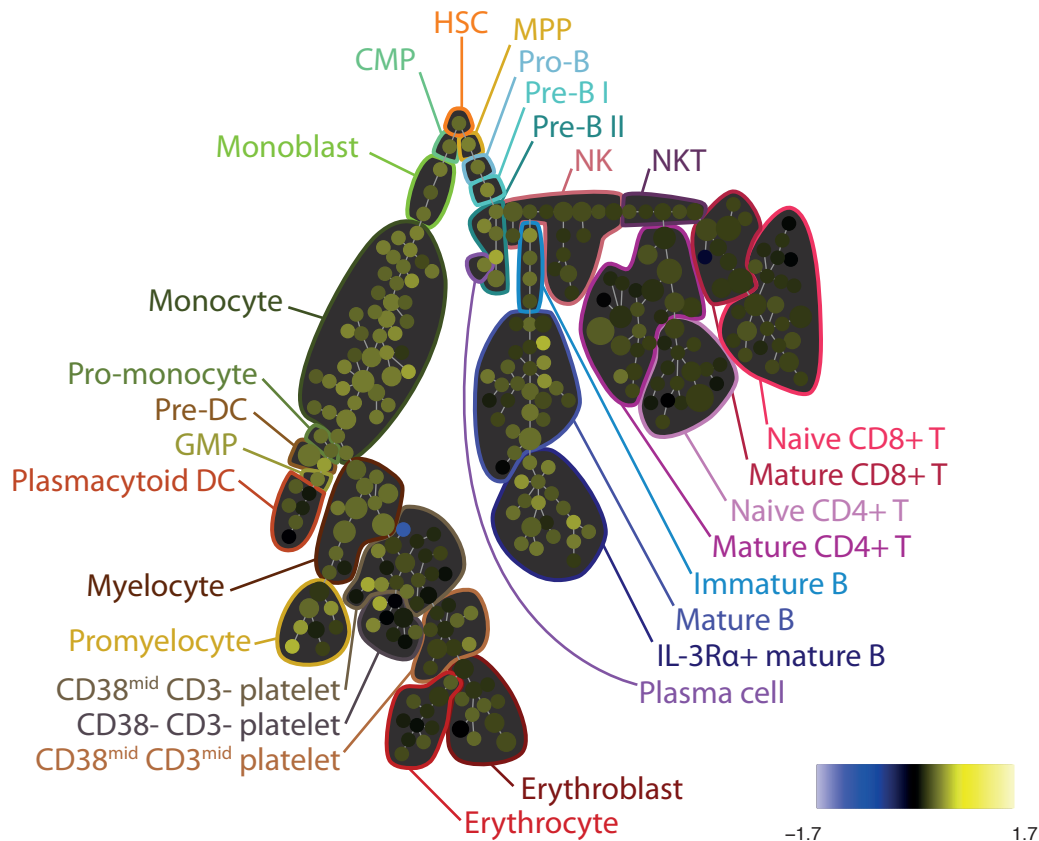



Figure S8A

174-pSrcFK — IL3 vs Ref Ratio

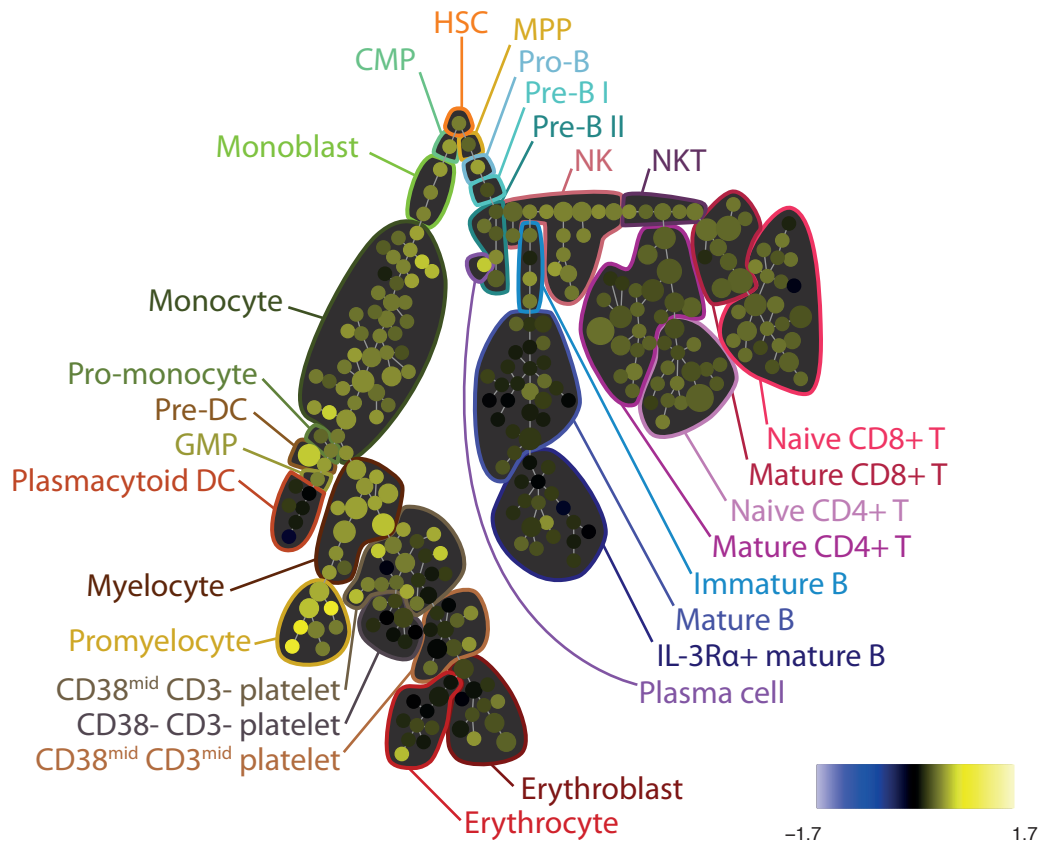

Figure S8A

174-pSrcFK — IL7 vs Ref Ratio

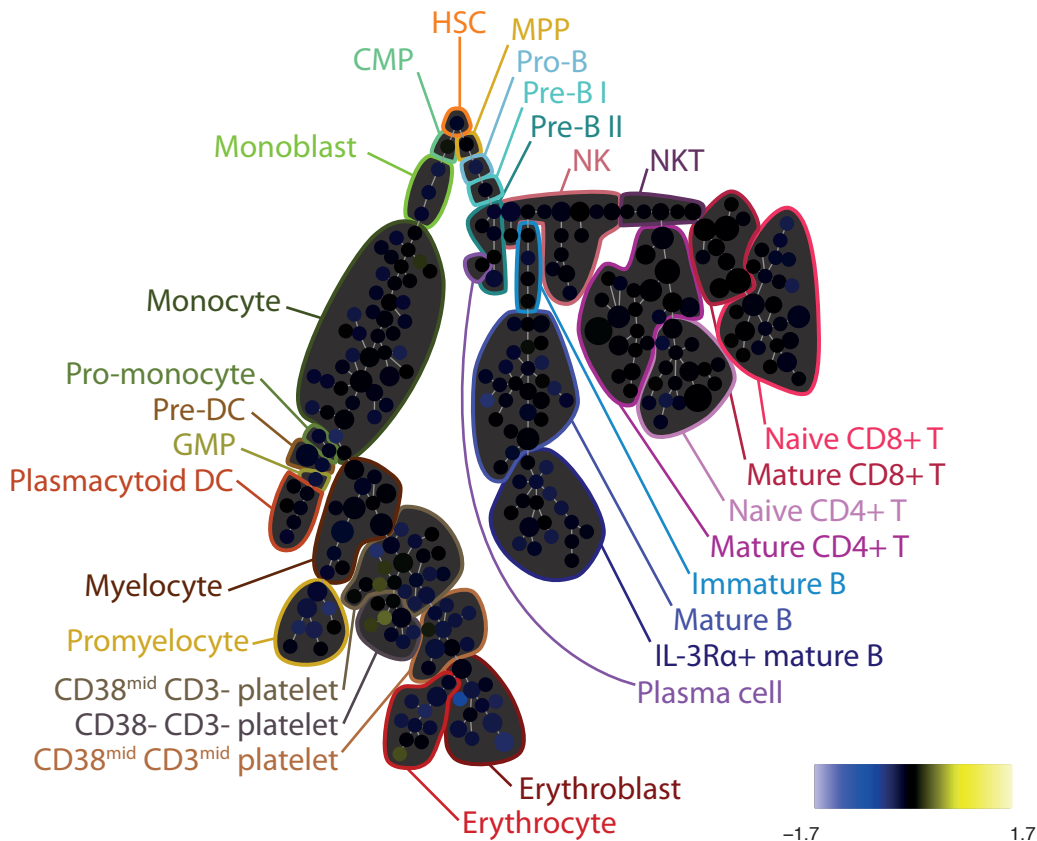

Figure S8A

174-pSrcFK ---- LPS vs Ref Ratio

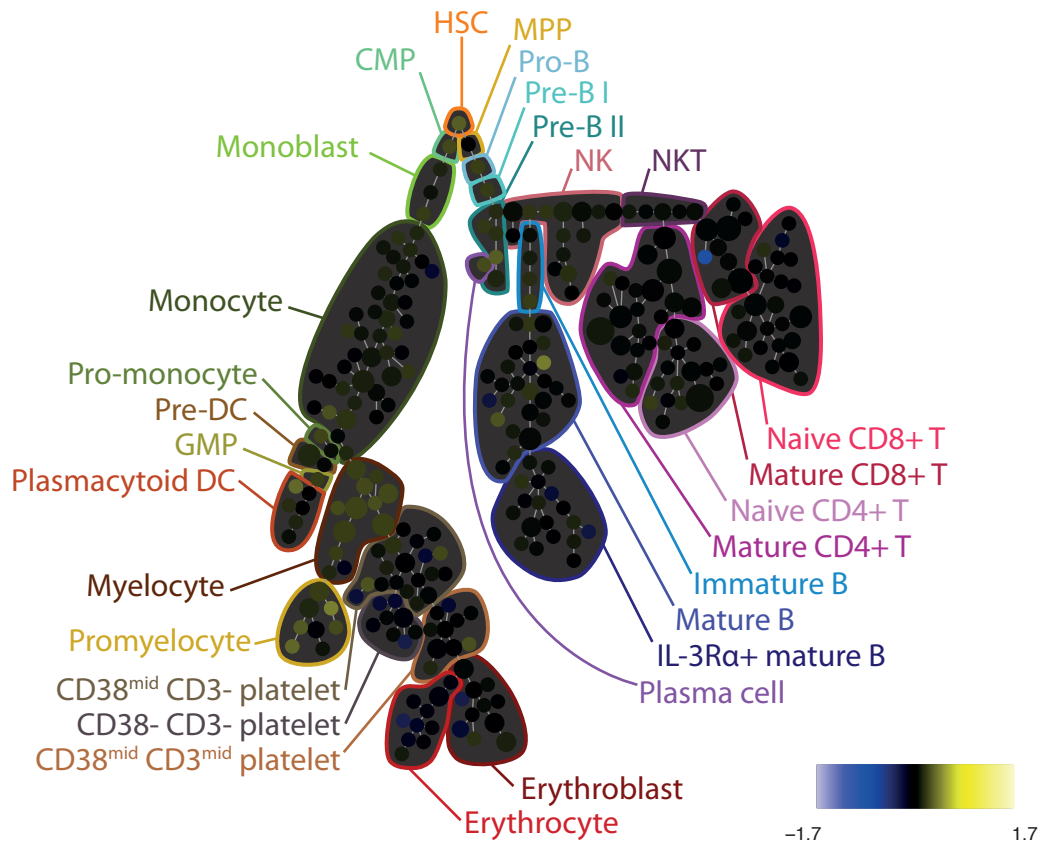

Figure S8A

174-pSrcFK ---- PMAiono vs Ref Ratio

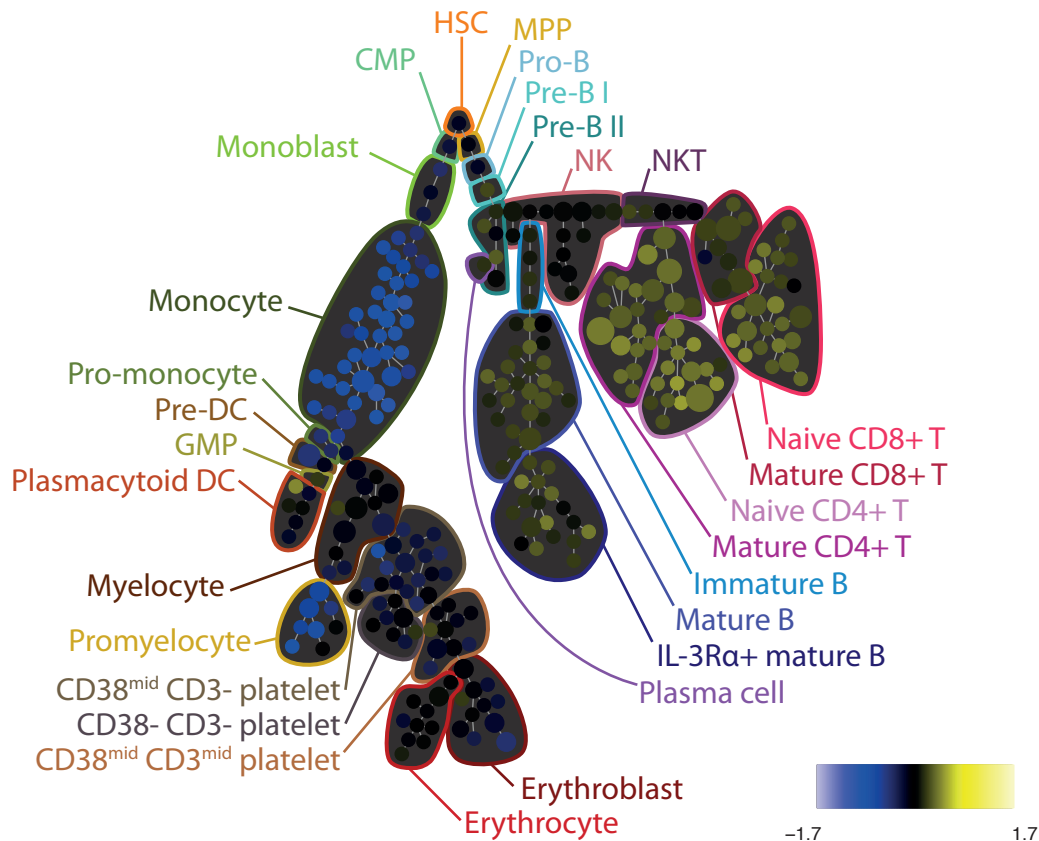

Figure S8A

174-pSrcFK — PVO4 vs Ref Ratio

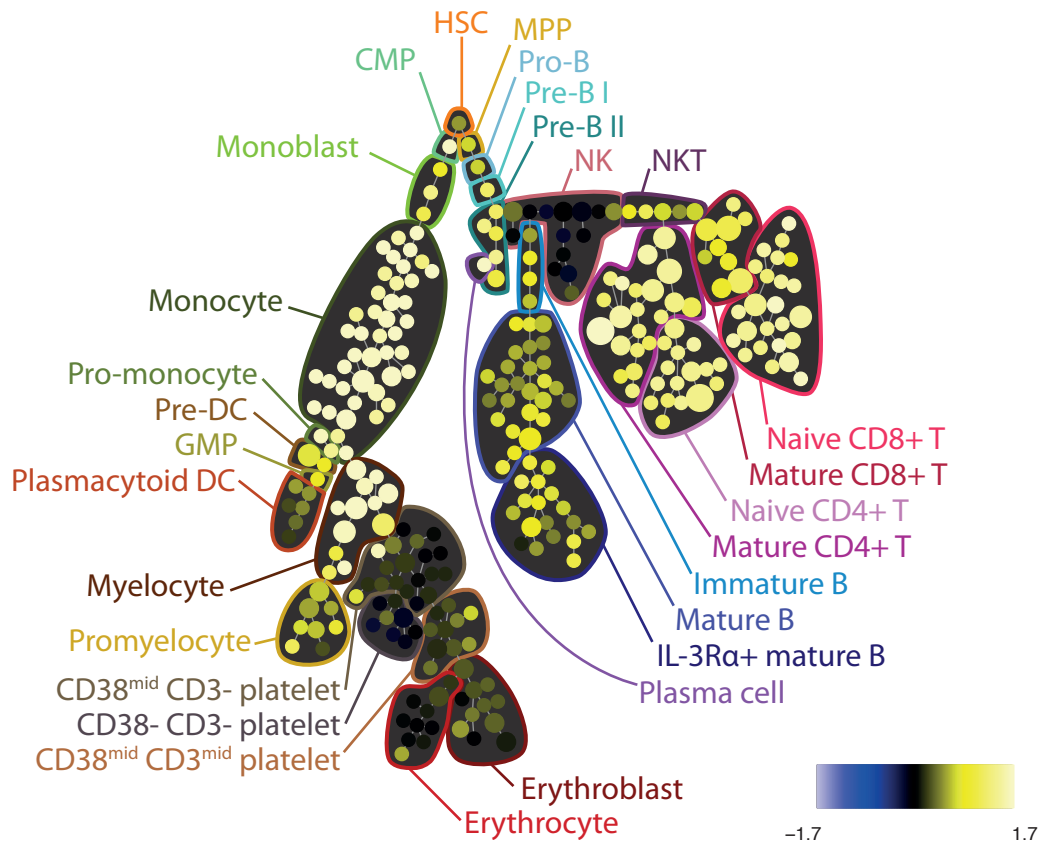

Figure S8A

174-pSrcFK ---- SCF vs Ref Ratio

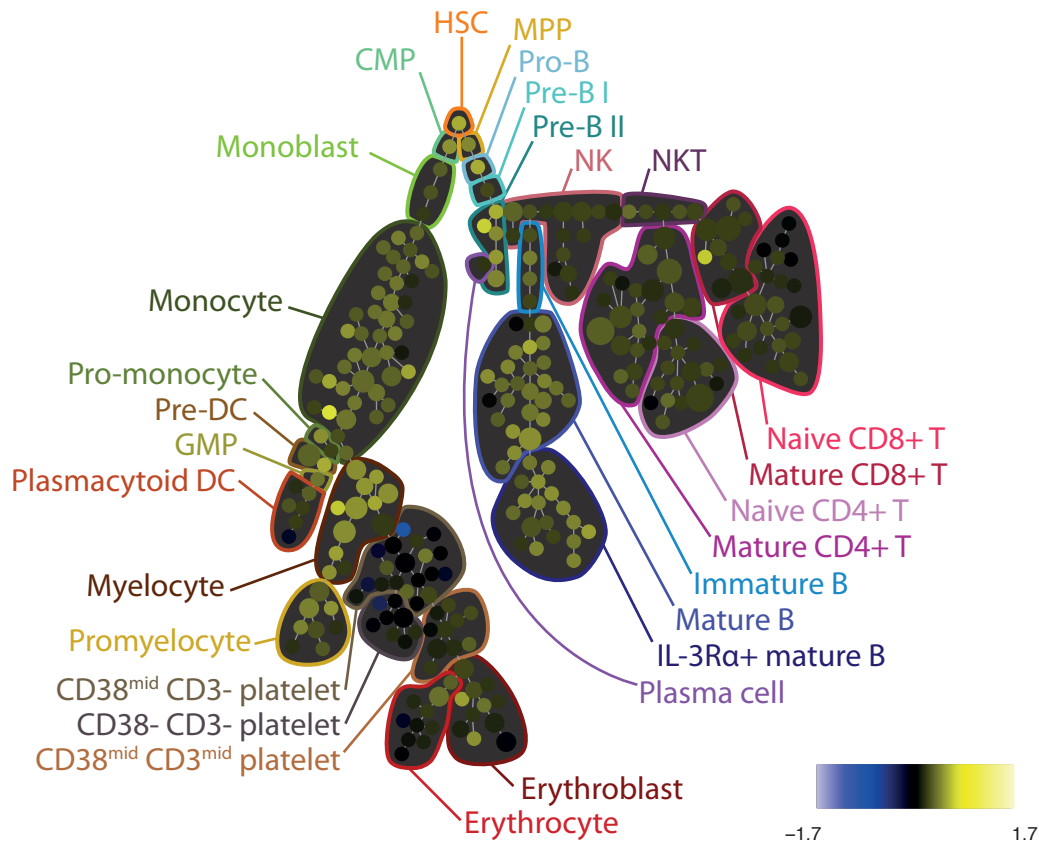

Figure S8A

174-pSrcFK ---- TNFa vs Ref Ratio

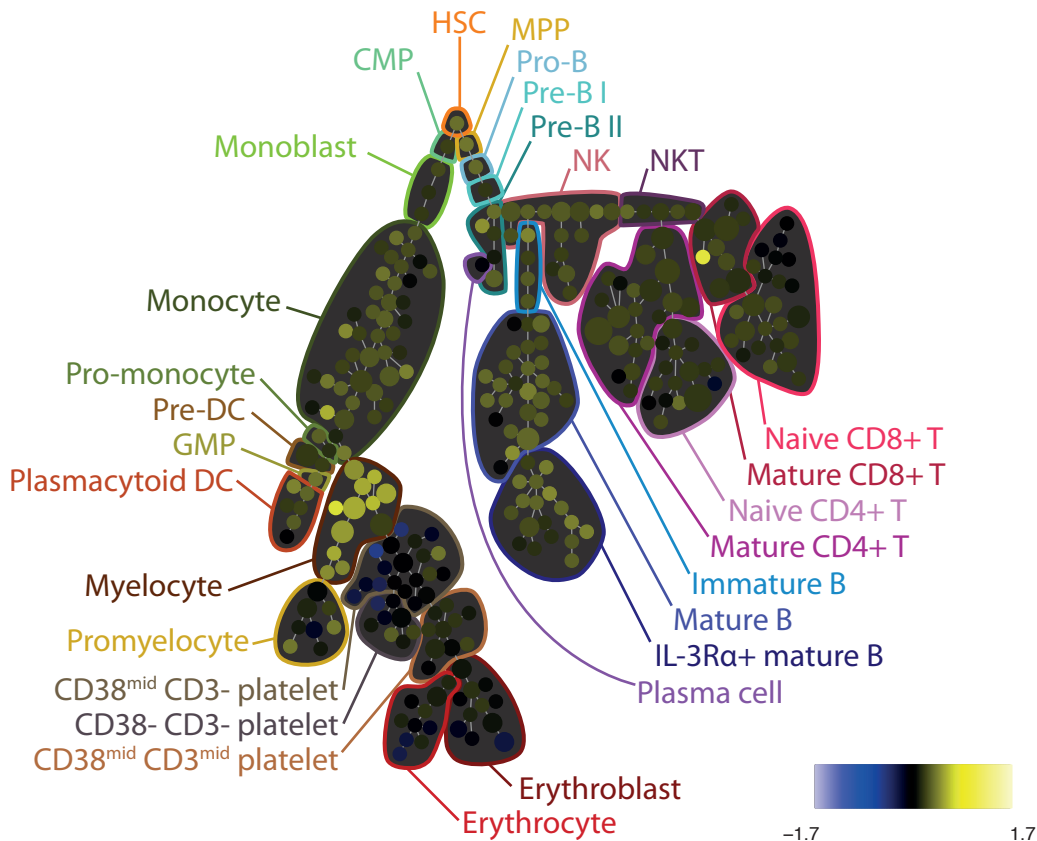

Figure S8A

174-pSrcFK ---- TPO vs Ref Ratio

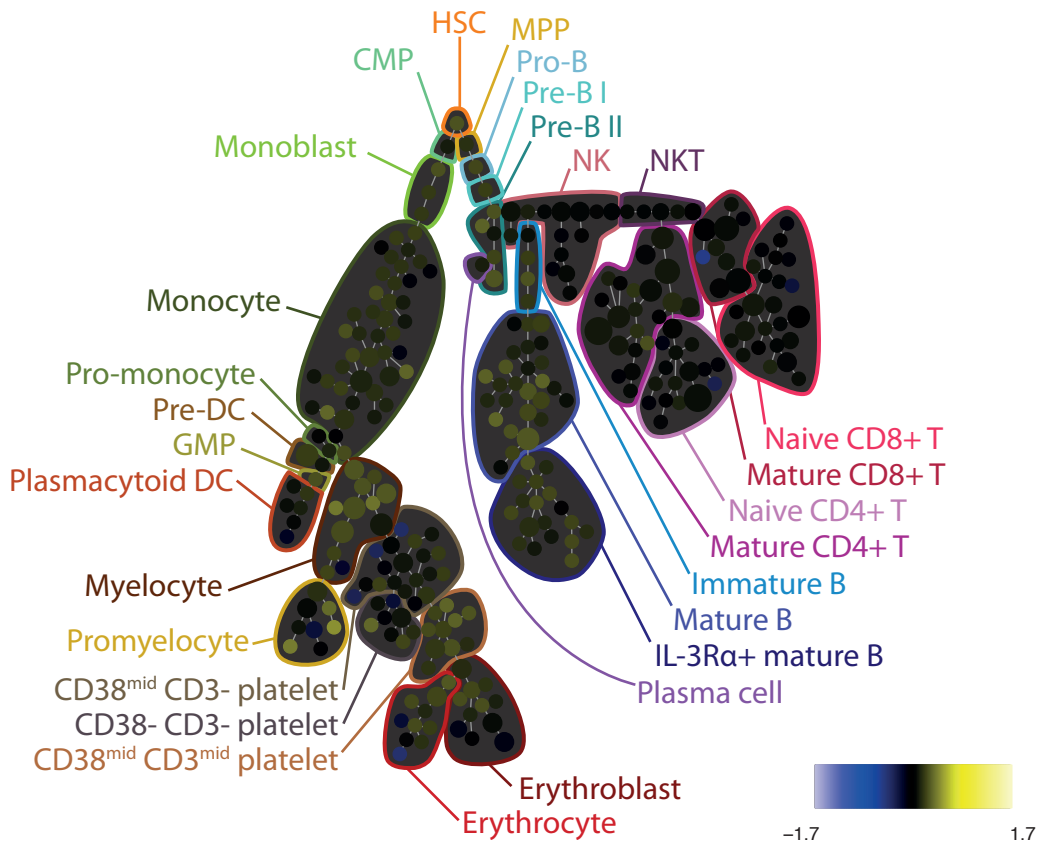



Figure S8A

175-pCrkL ---- BCR vs Ref Ratio

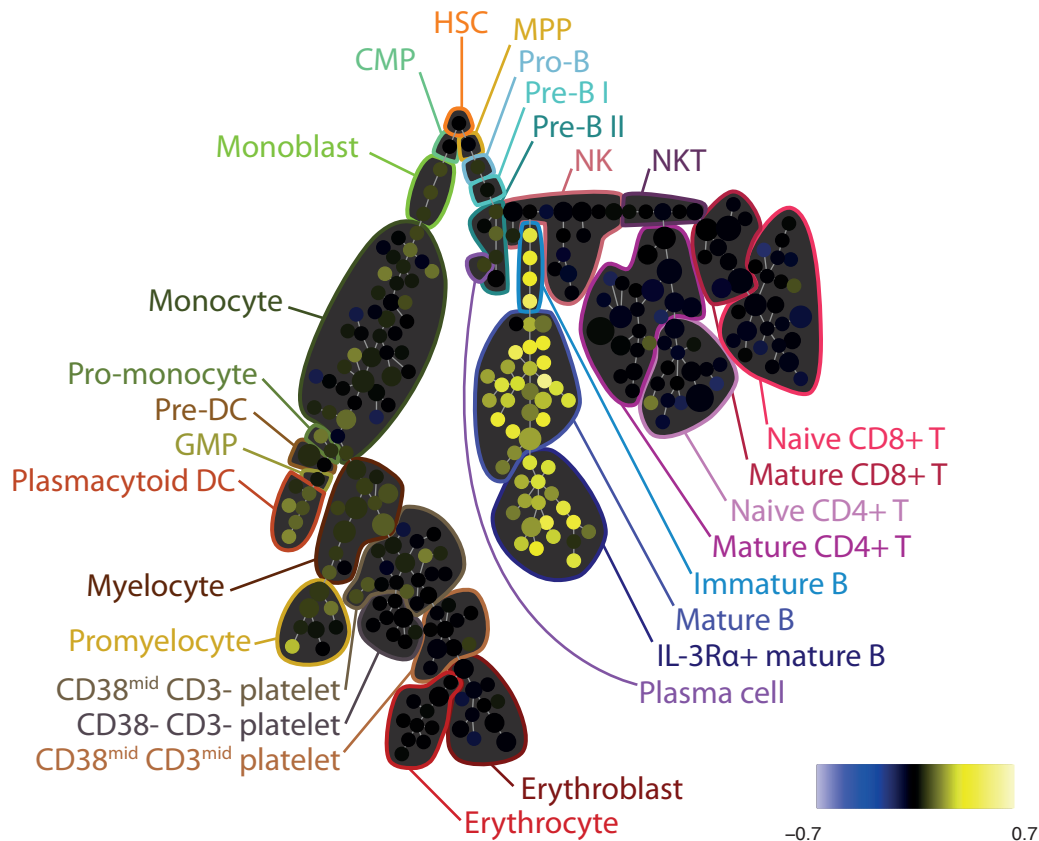

Figure S8A

175-pCrkL ---- DMSO vs Ref Ratio

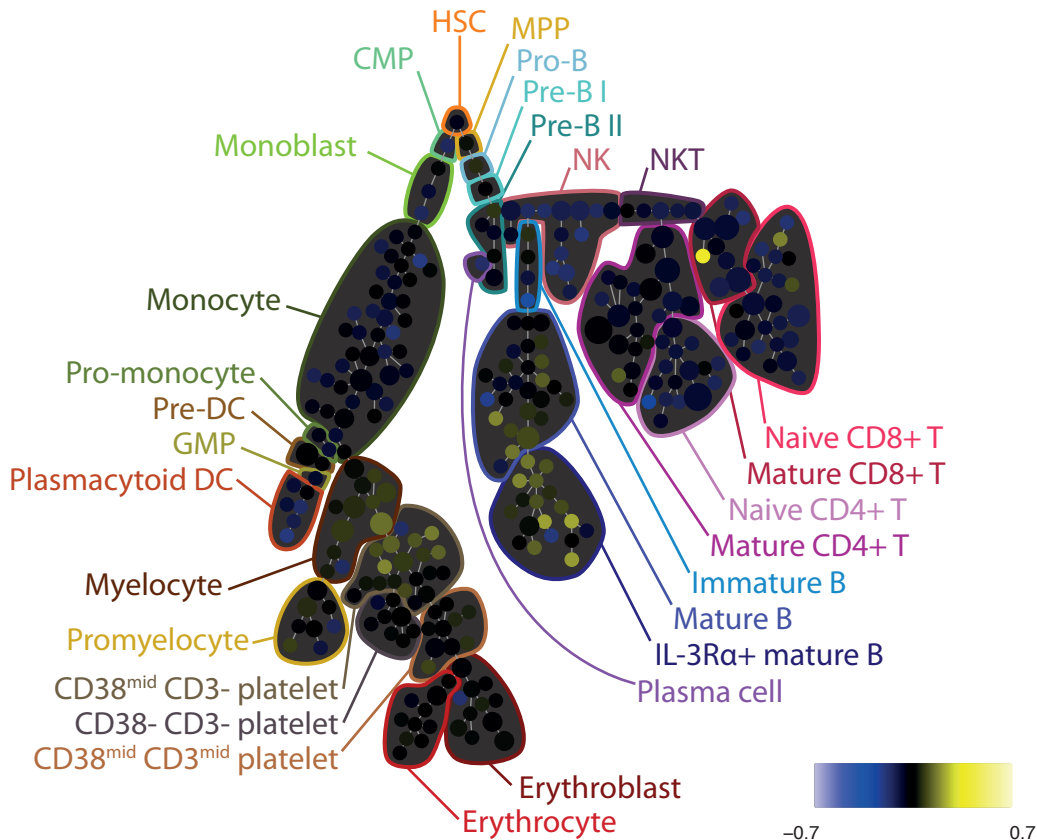

Figure S8A

175-pCrkL ---- Flt3L vs Ref Ratio

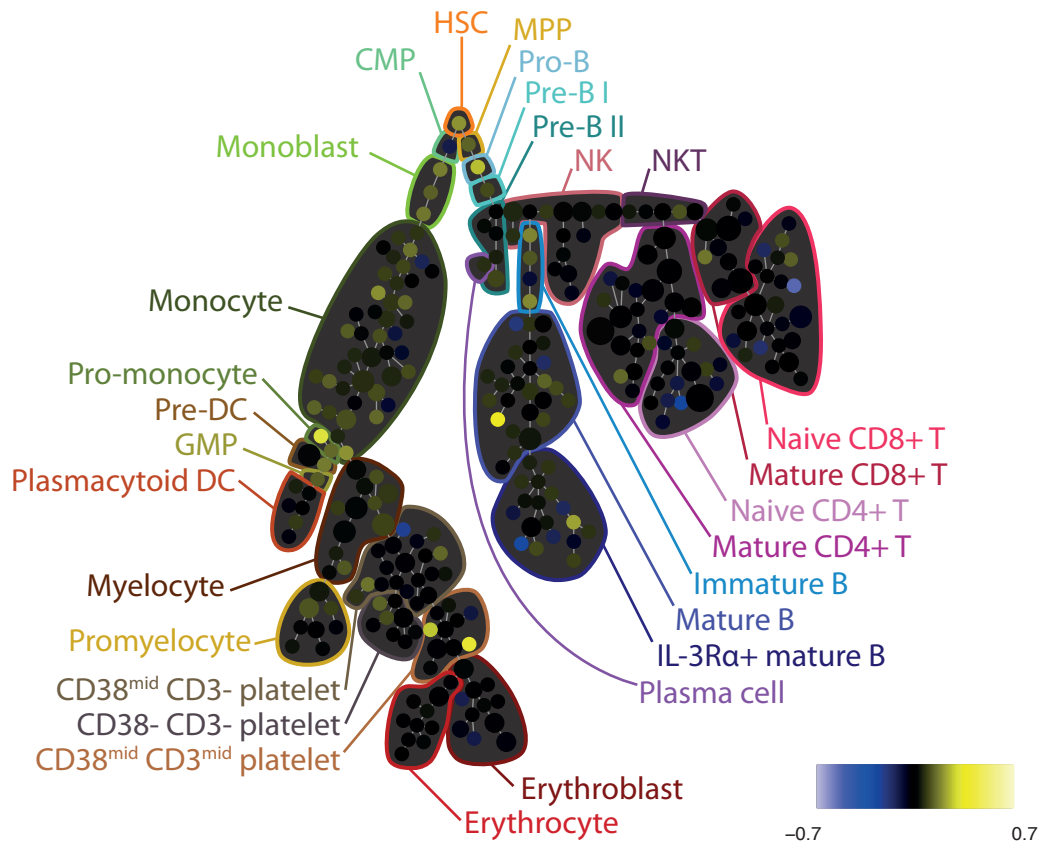

Figure S8A

175-pCrkL --- GCSF vs Ref Ratio

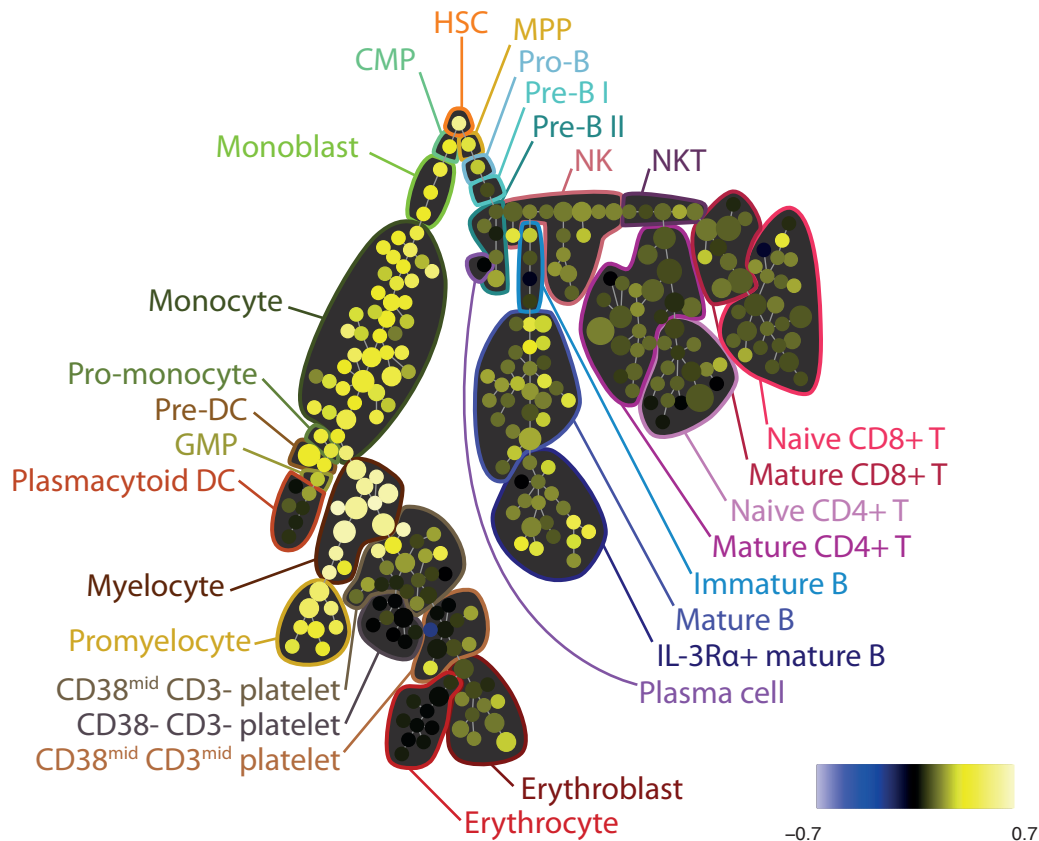

Figure S8A

175-pCrkL ---- GMCSF vs Ref Ratio

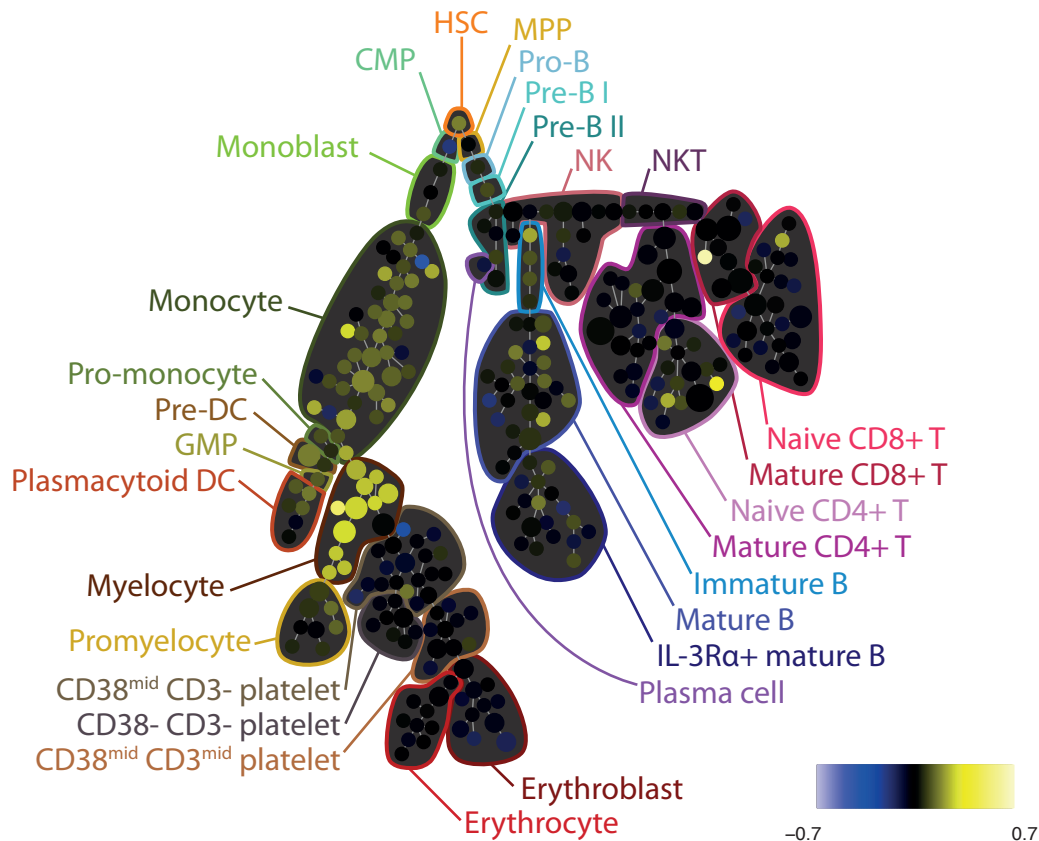

Figure S8A

175-pCrkL ---- IFNad vs Ref Ratio

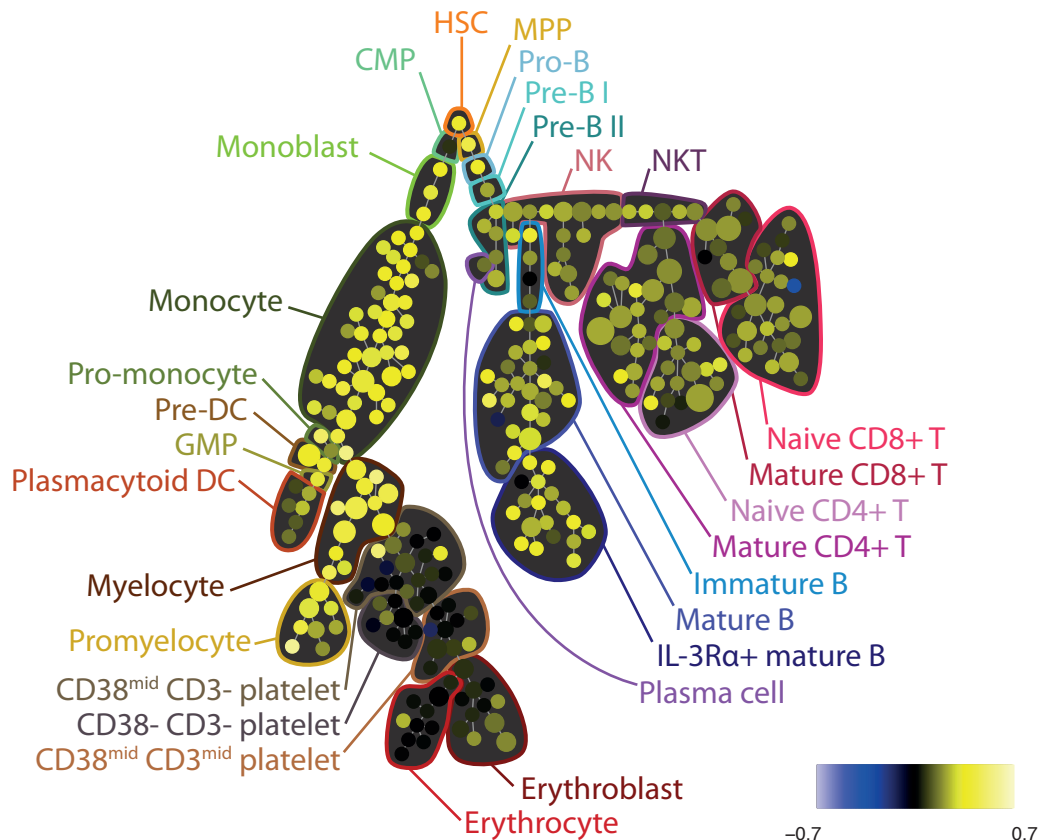

Figure S8A

175-pCrkL ---- IL3 vs Ref Ratio

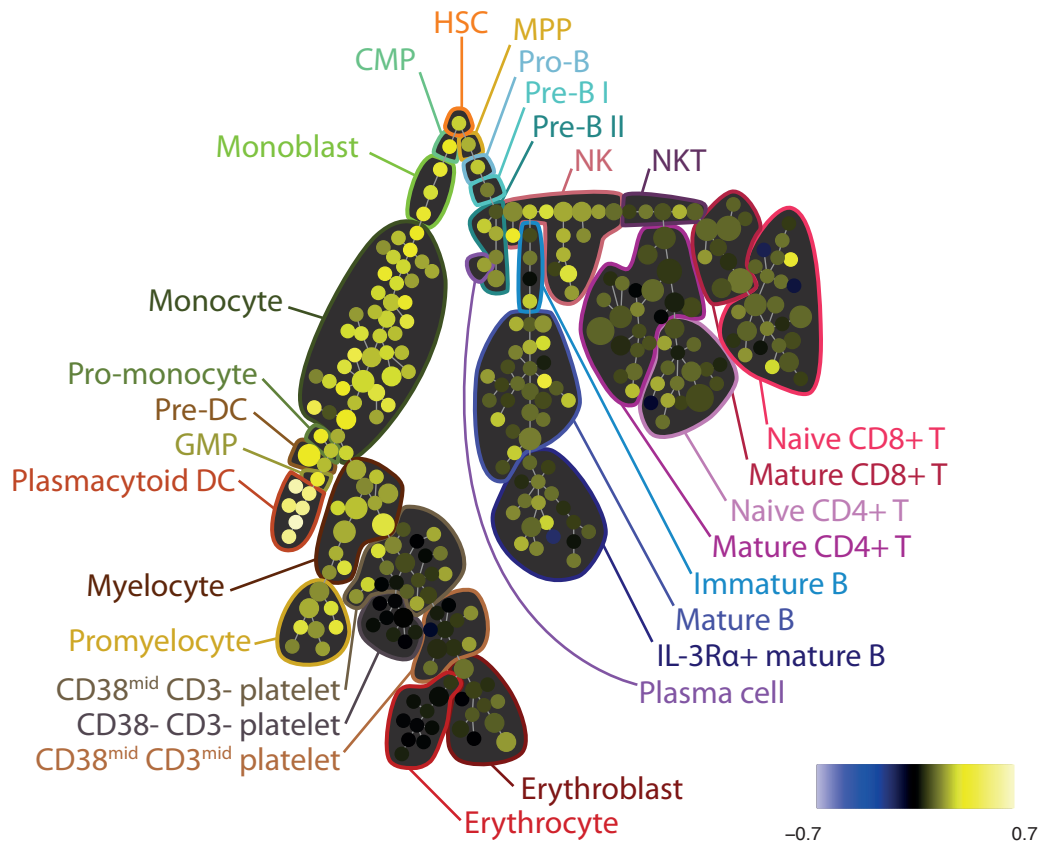

Figure S8A

175-pCrkL ---- IL7 vs Ref Ratio

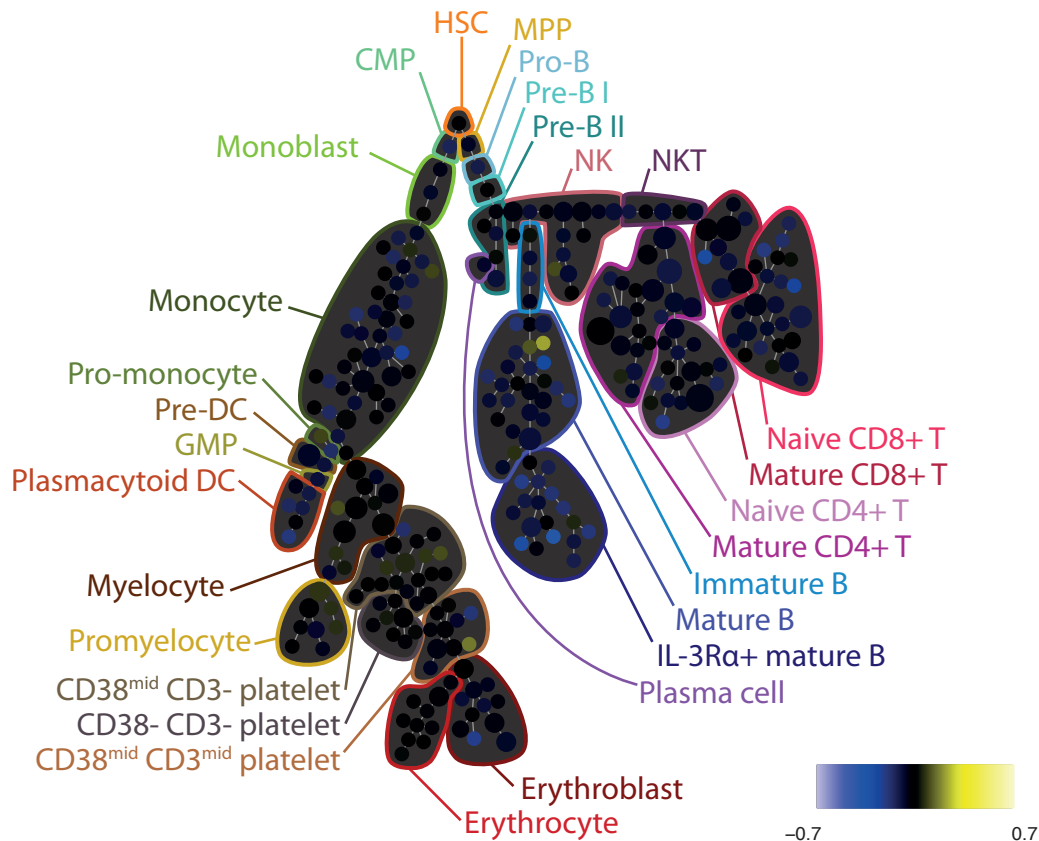



Figure S8A

175-pCrkL ---- LPS vs Ref Ratio

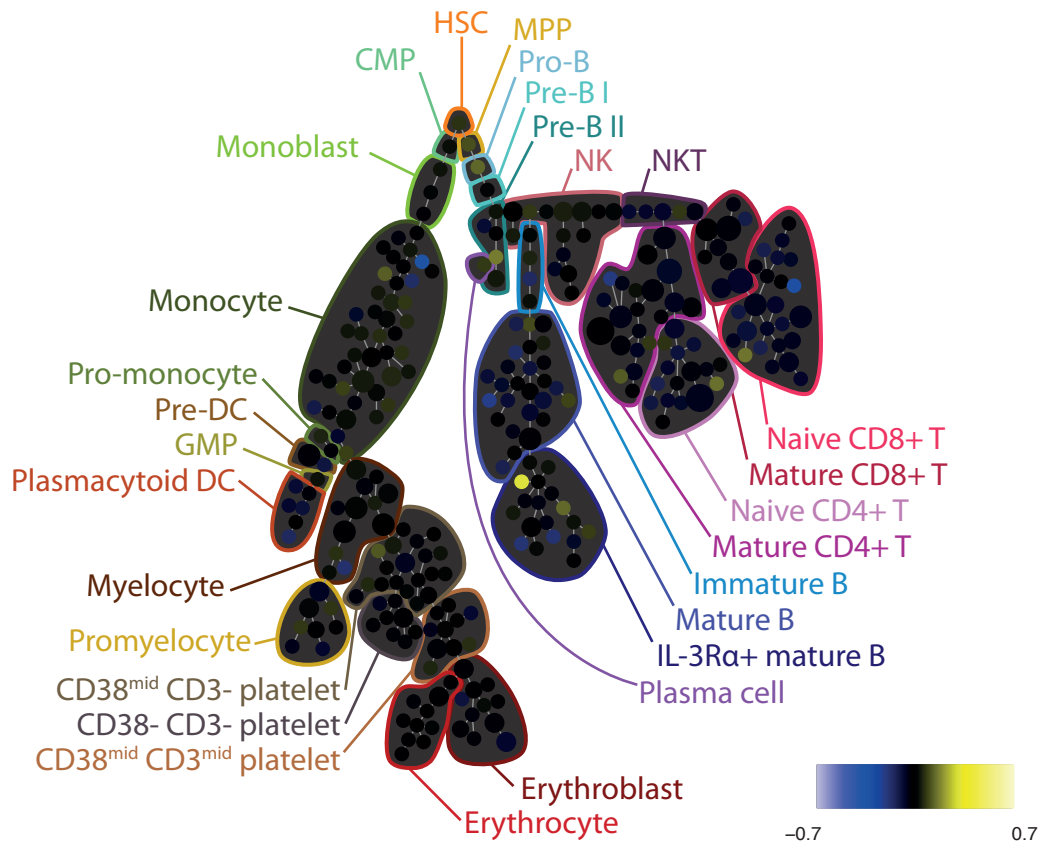

Figure S8A

175-pCrkL ---- PMAiono vs Ref Ratio

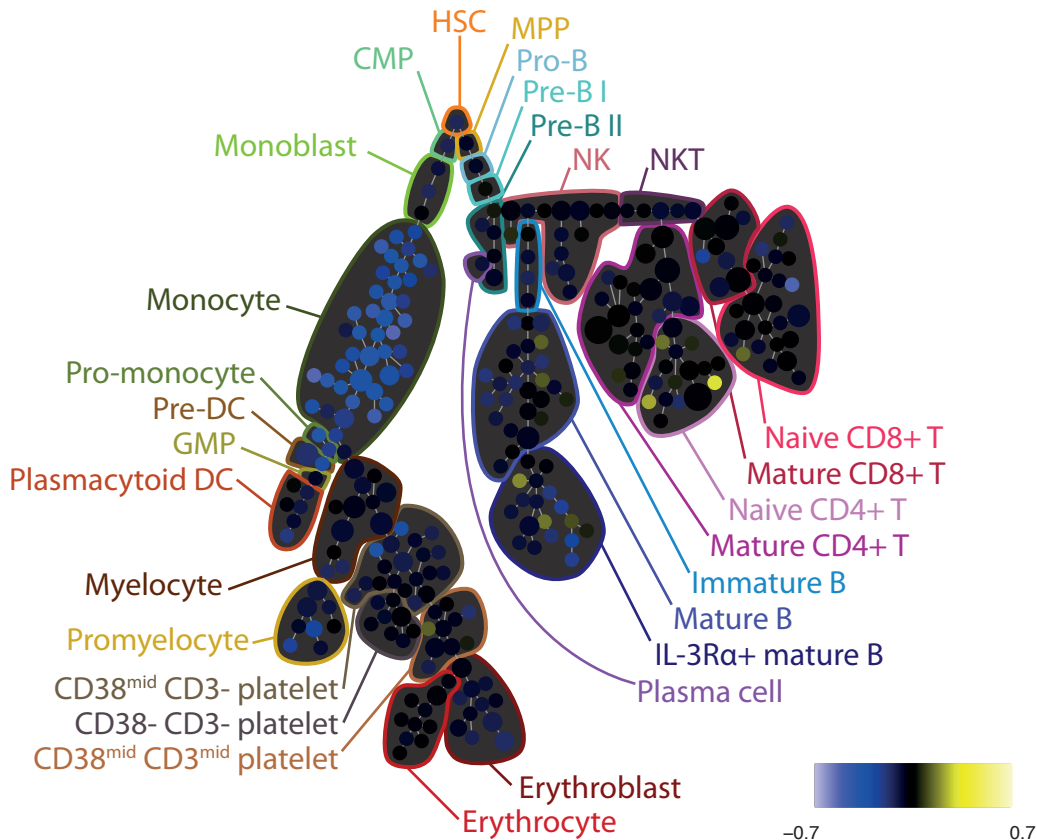

Figure S8A

175-pCrkL ---- PVO4 vs Ref Ratio

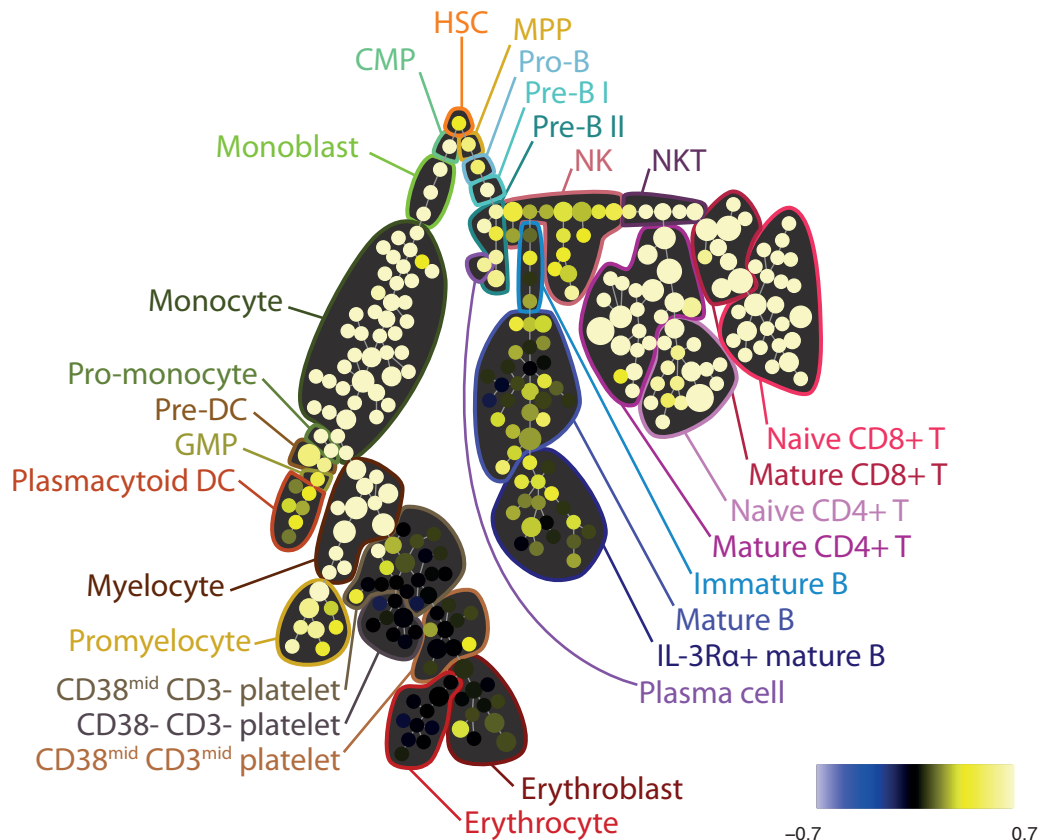

Figure S8A

175-pCrkL ---- SCF vs Ref Ratio

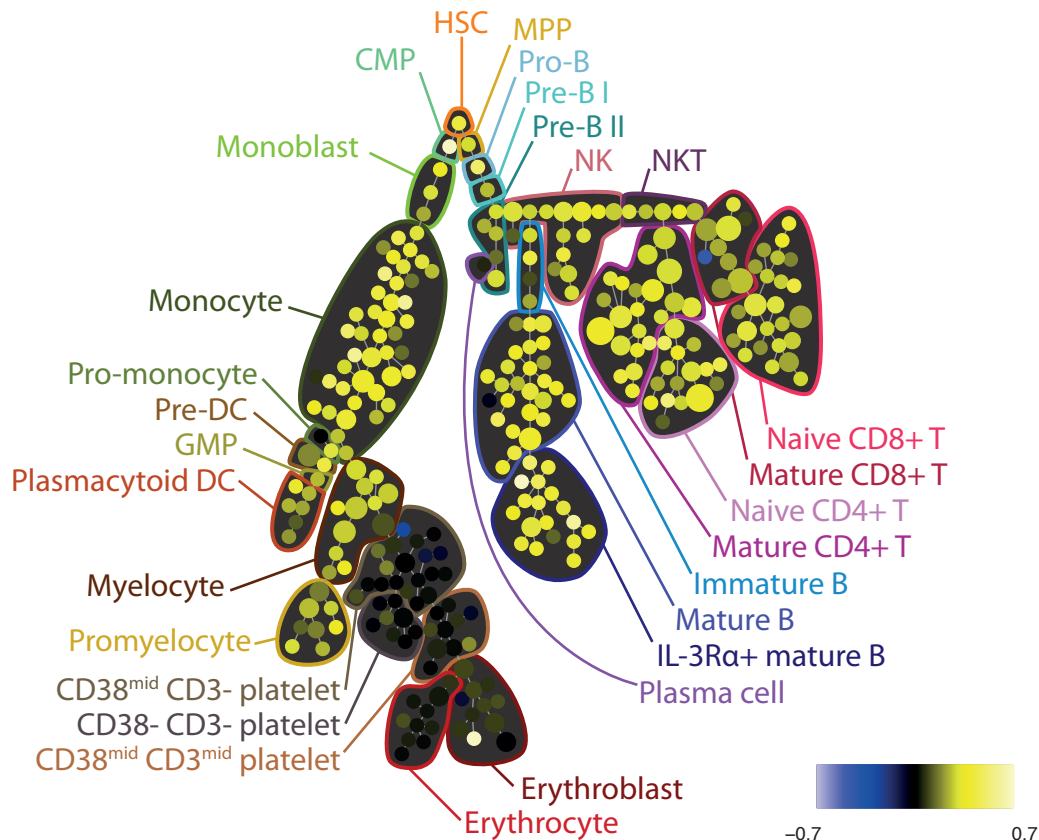

Figure S8A

175-pCrkL --- TNFa vs Ref Ratio

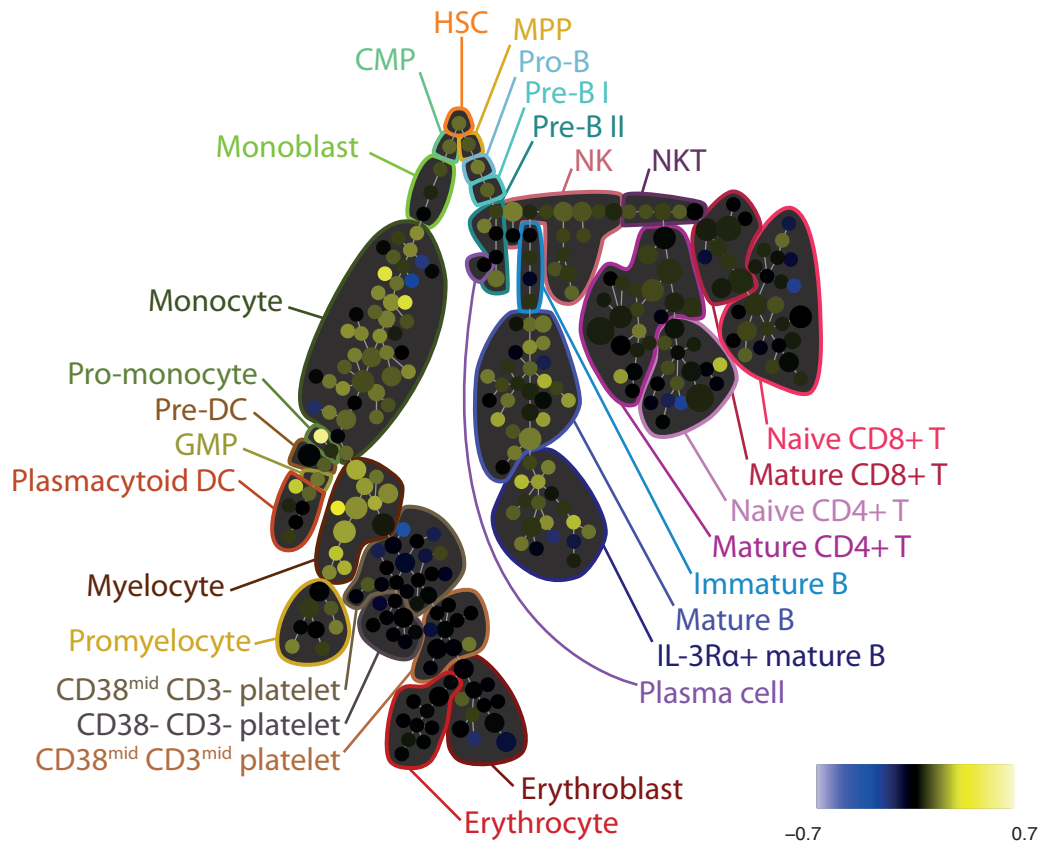

Figure S8A

175-pCrkL ---- TPO vs Ref Ratio

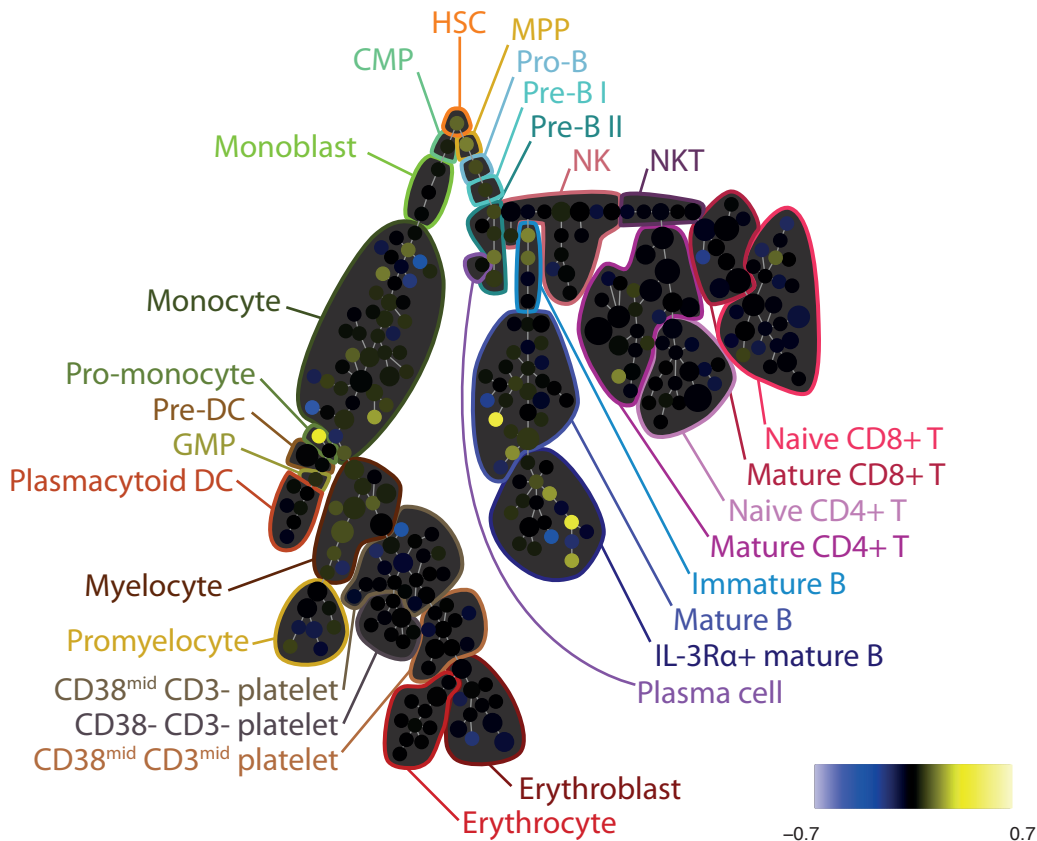

Figure S8A

176-pCREB ---- BCR vs Ref Ratio

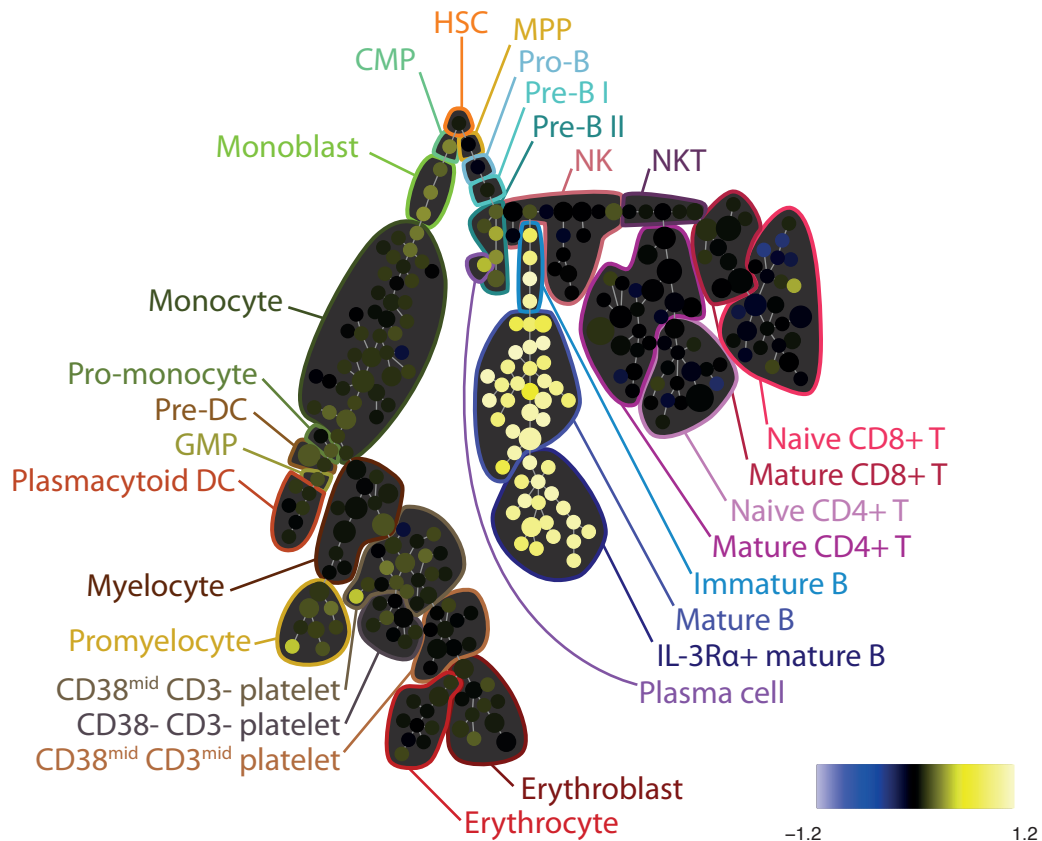

Figure S8A

176-pCREB ---- DMSO vs Ref Ratio

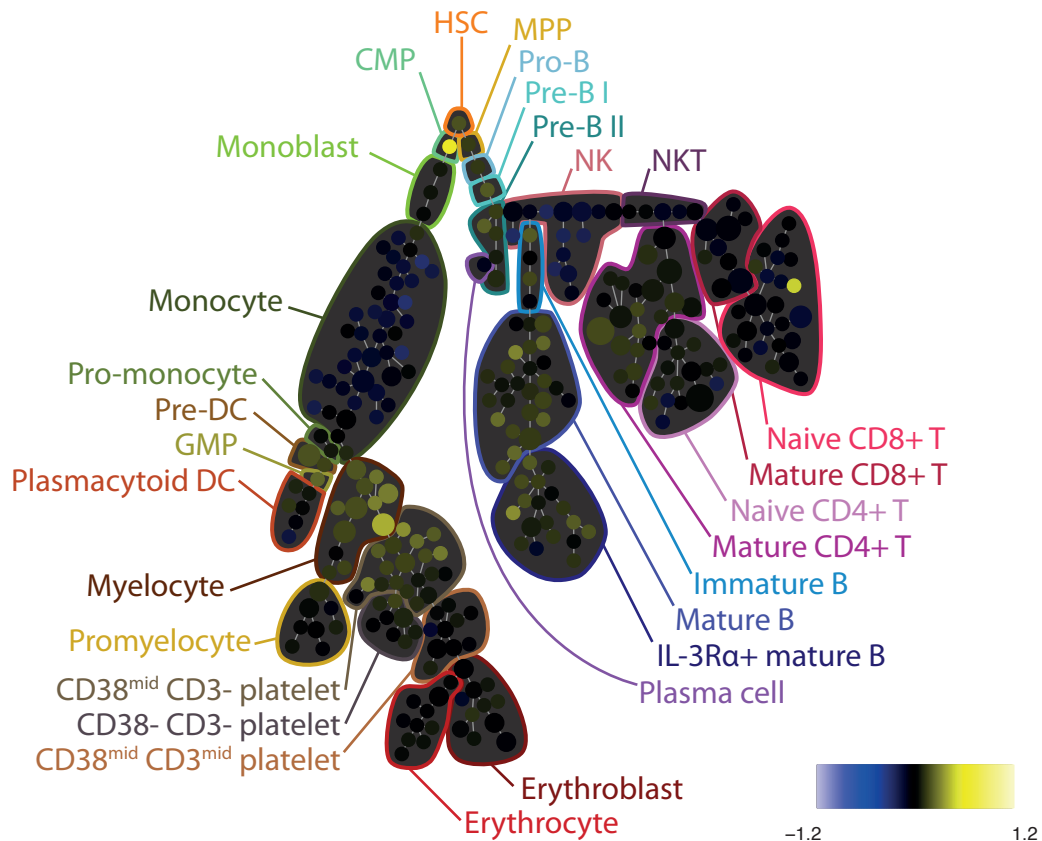



Figure S8A

176-pCREB ---- Flt3L vs Ref Ratio

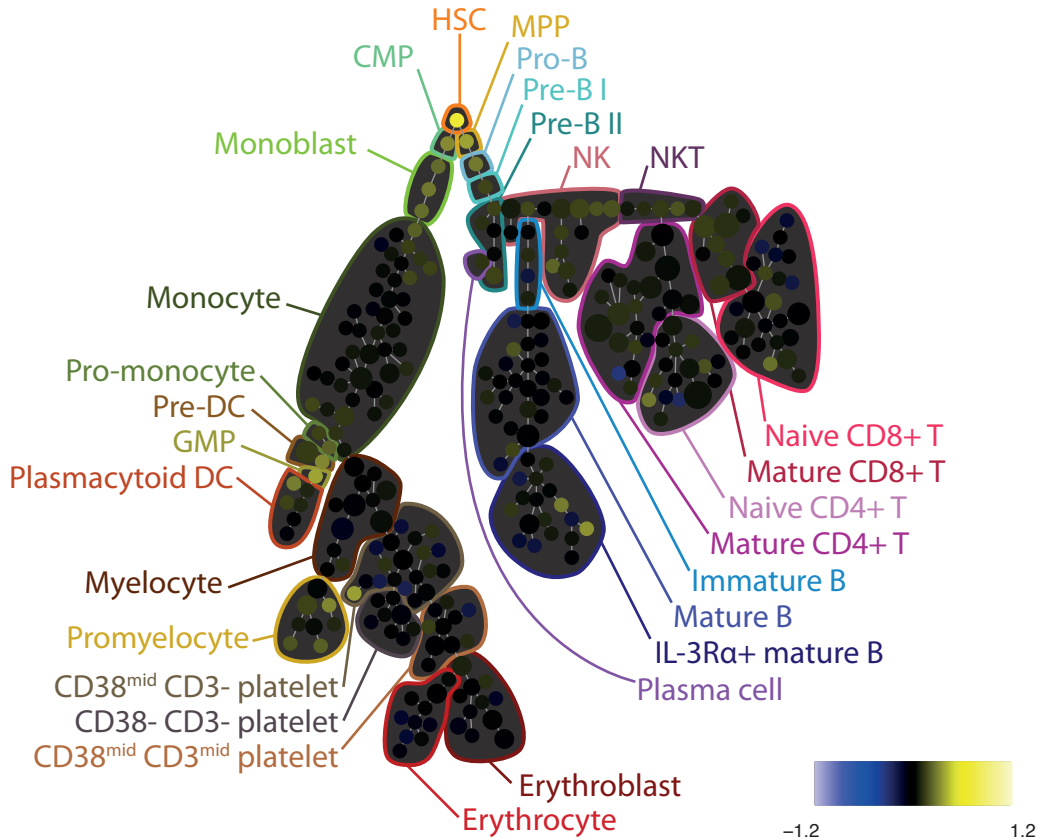

Figure S8A

176-pCREB ---- GCSF vs Ref Ratio

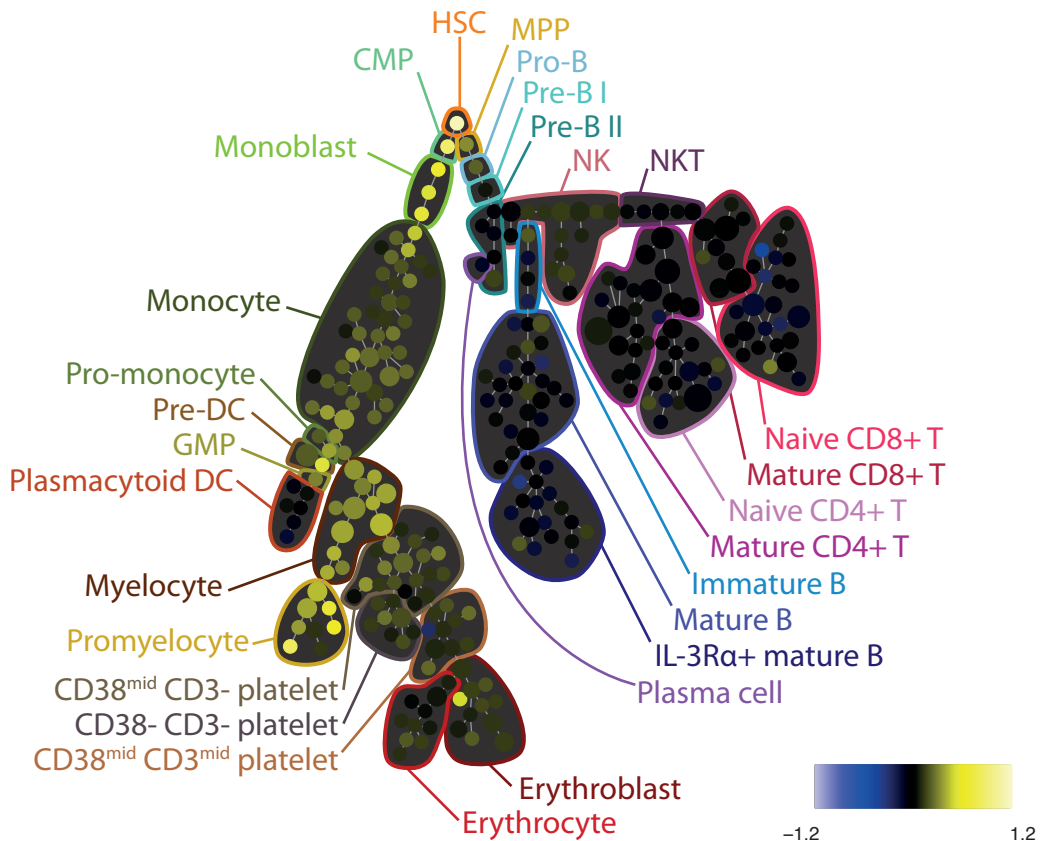

Figure S8A

176-pCREB ---- GMCSF vs Ref Ratio

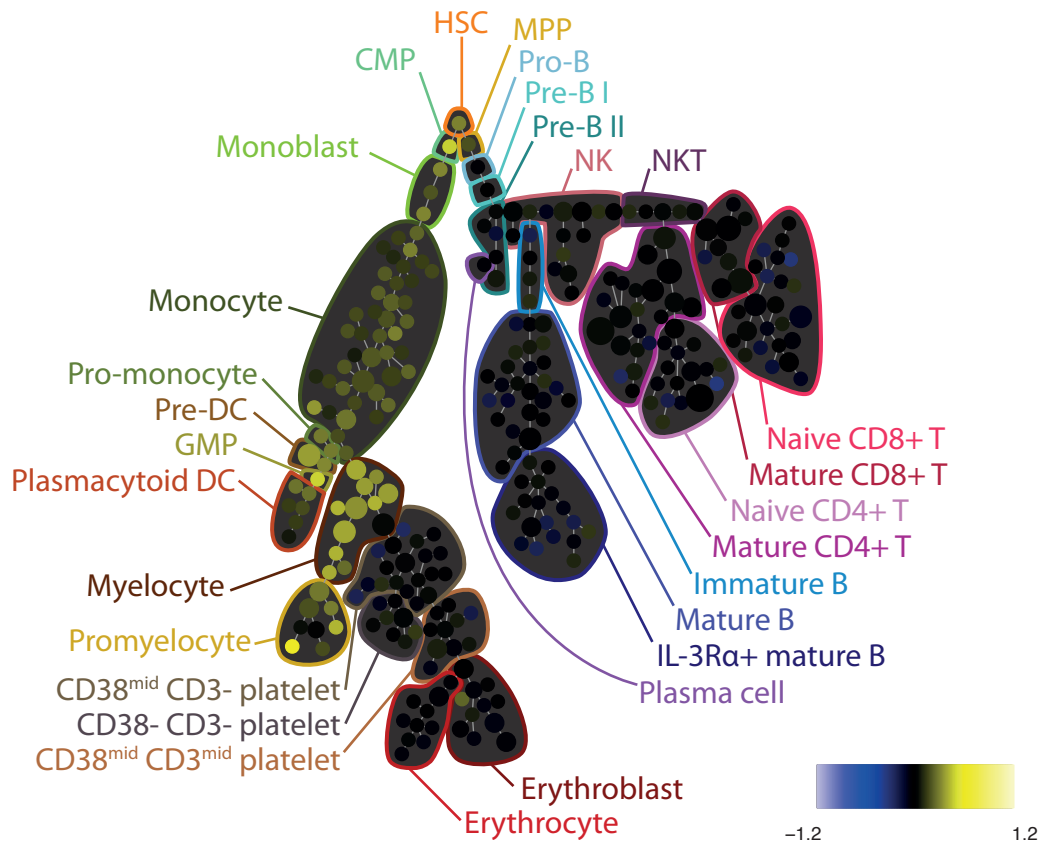

Figure S8A

176-pCREB ---- IFNad vs Ref Ratio

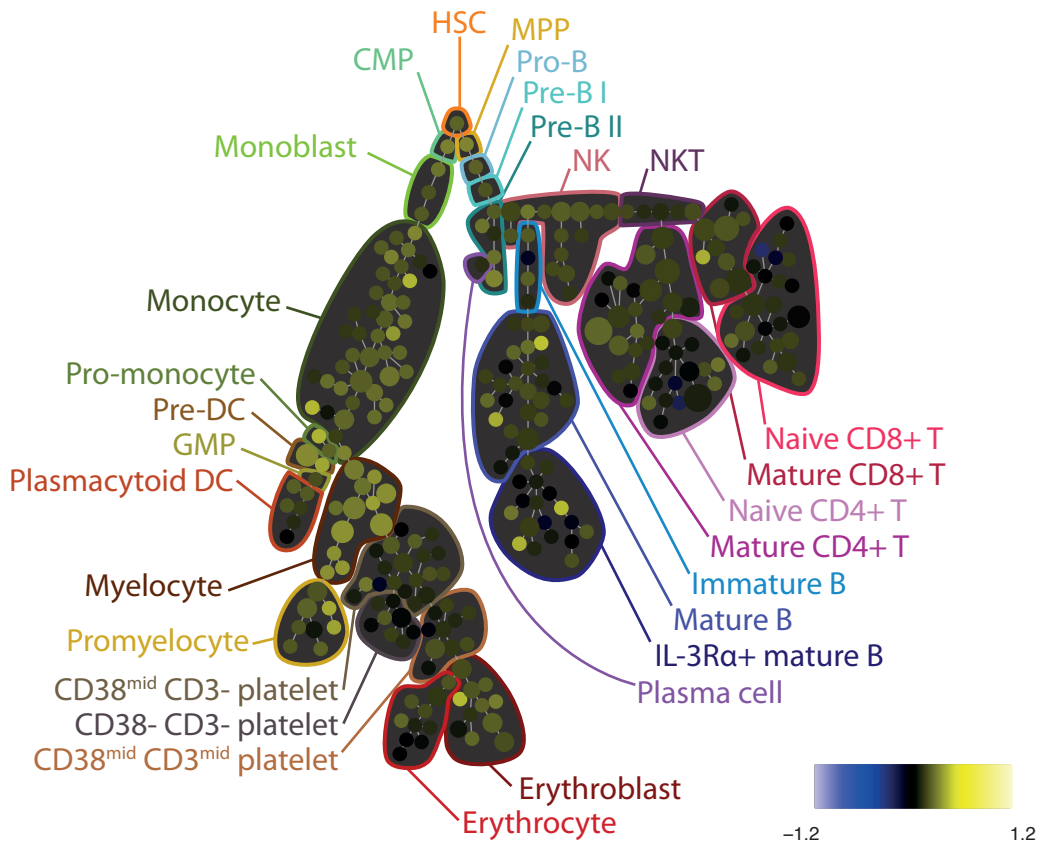

Figure S8A

176-pCREB — IL3 vs Ref Ratio

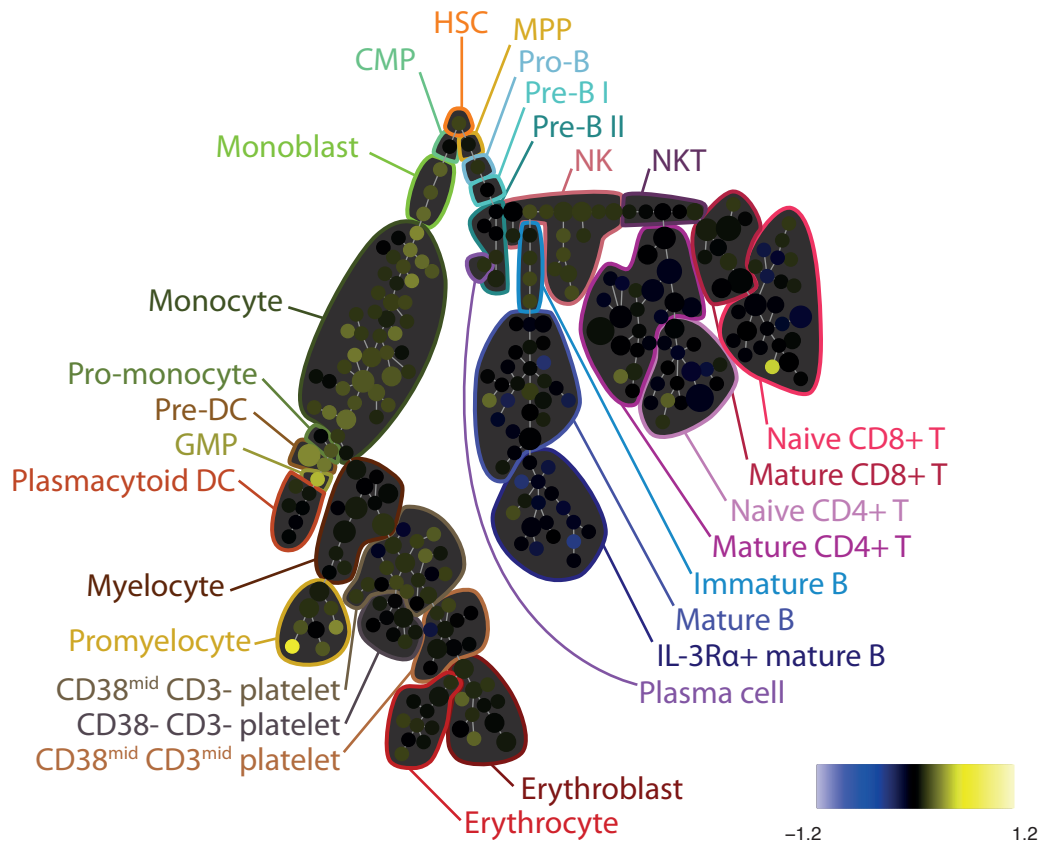

Figure S8A

176-pCREB — IL7 vs Ref Ratio

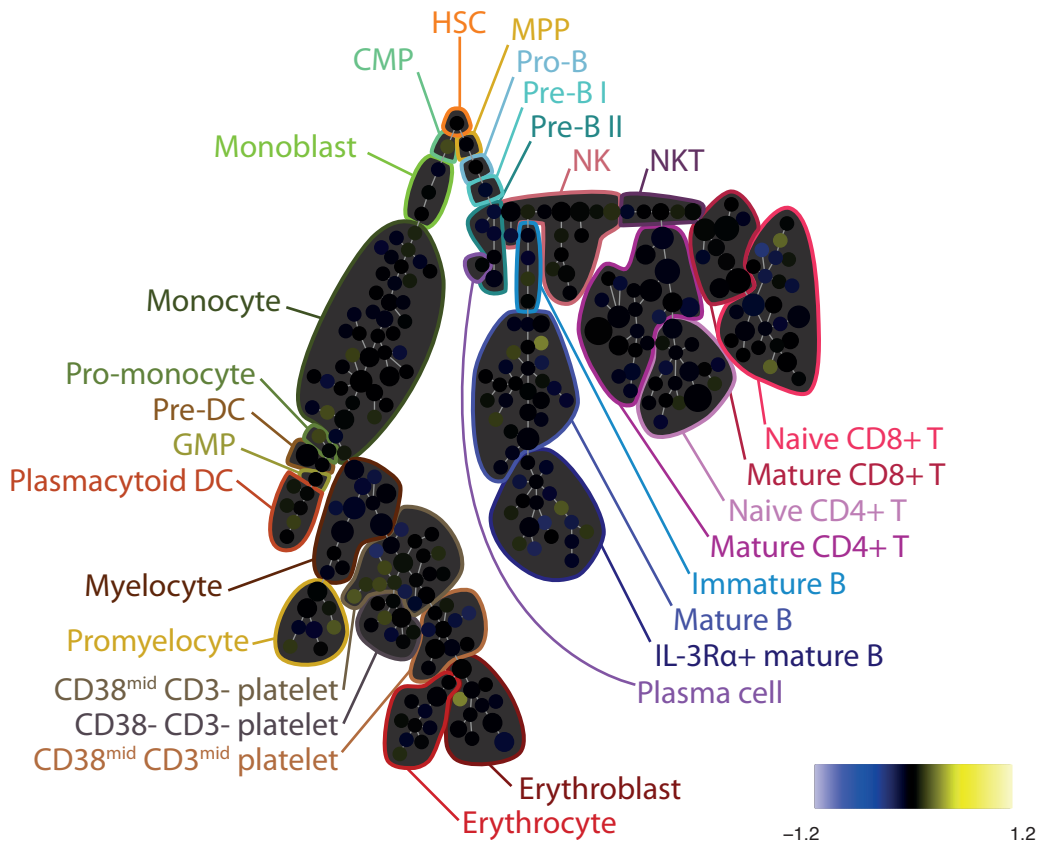

Figure S8A

176-pCREB ---- LPS vs Ref Ratio

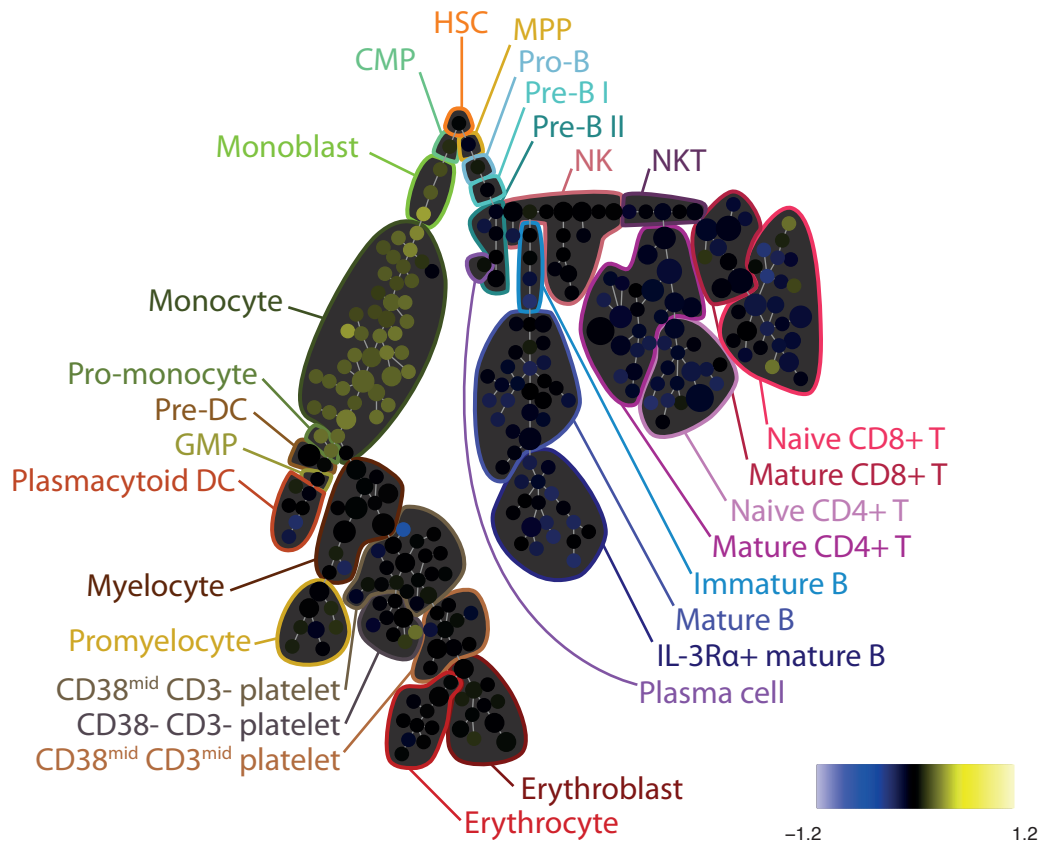

Figure S8A

176-pCREB ---- PMAiono vs Ref Ratio

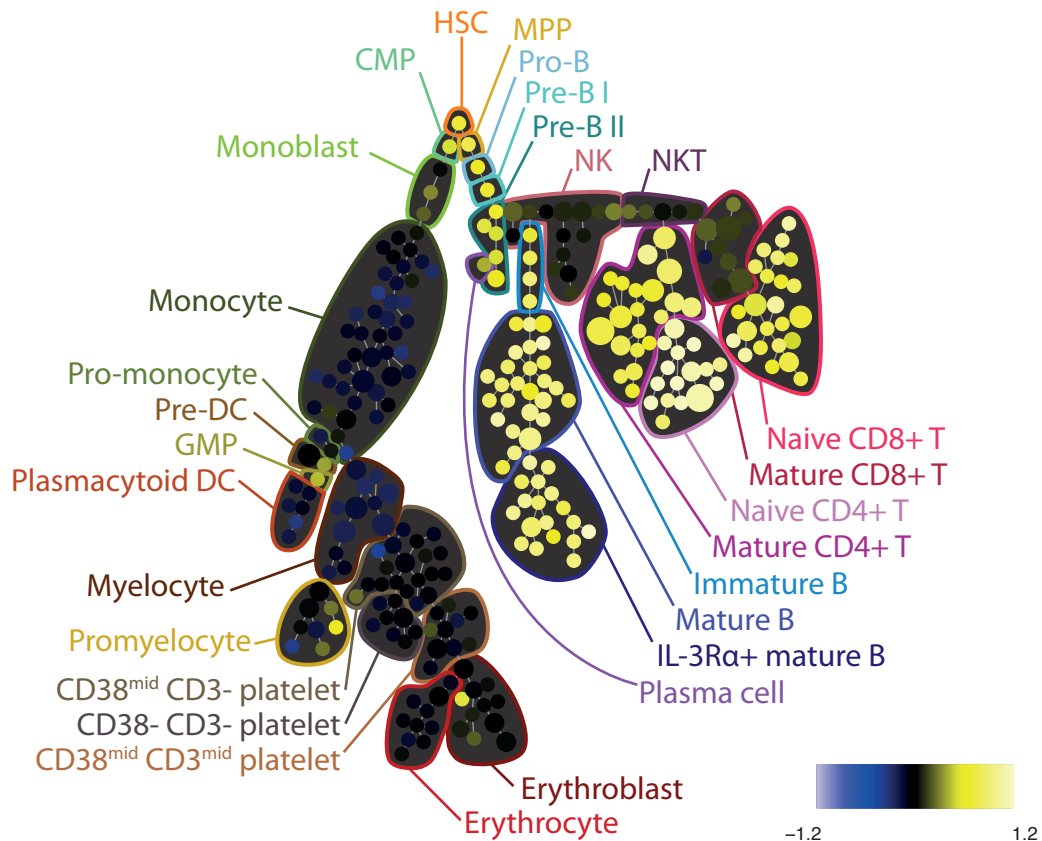



Figure S8A

176-pCREB — PVO4 vs Ref Ratio

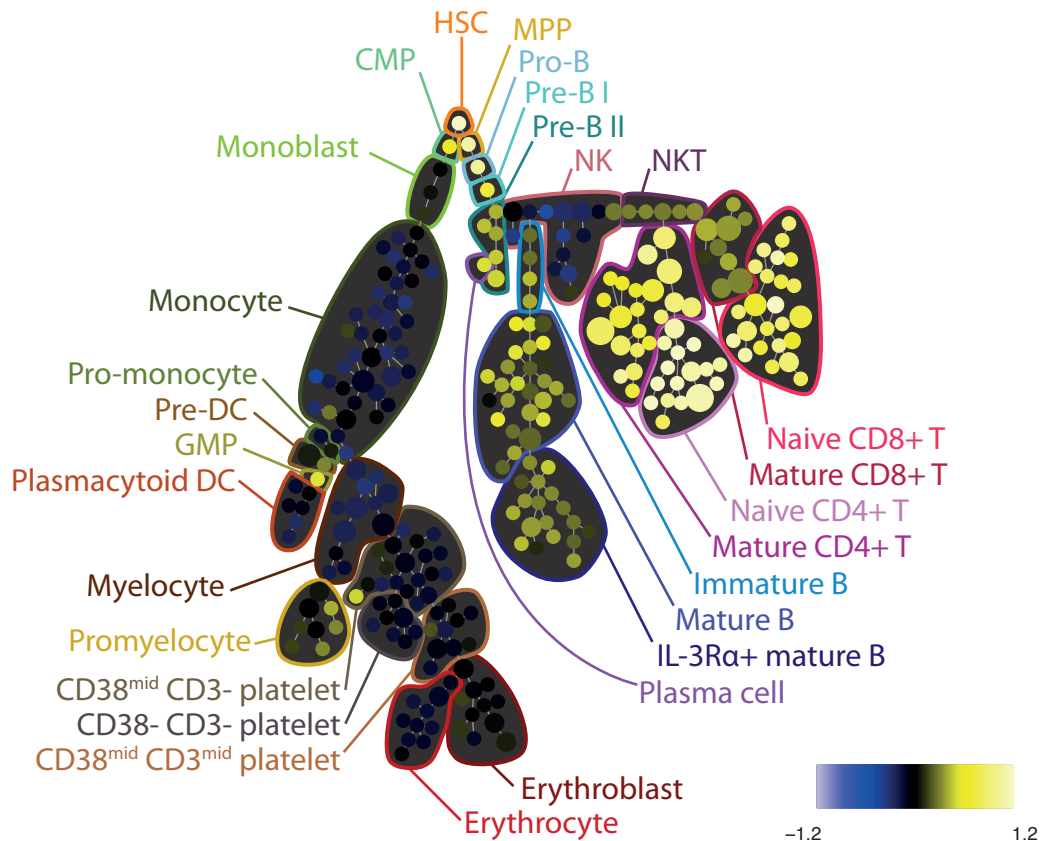

Figure S8A

176-pCREB ---- SCF vs Ref Ratio

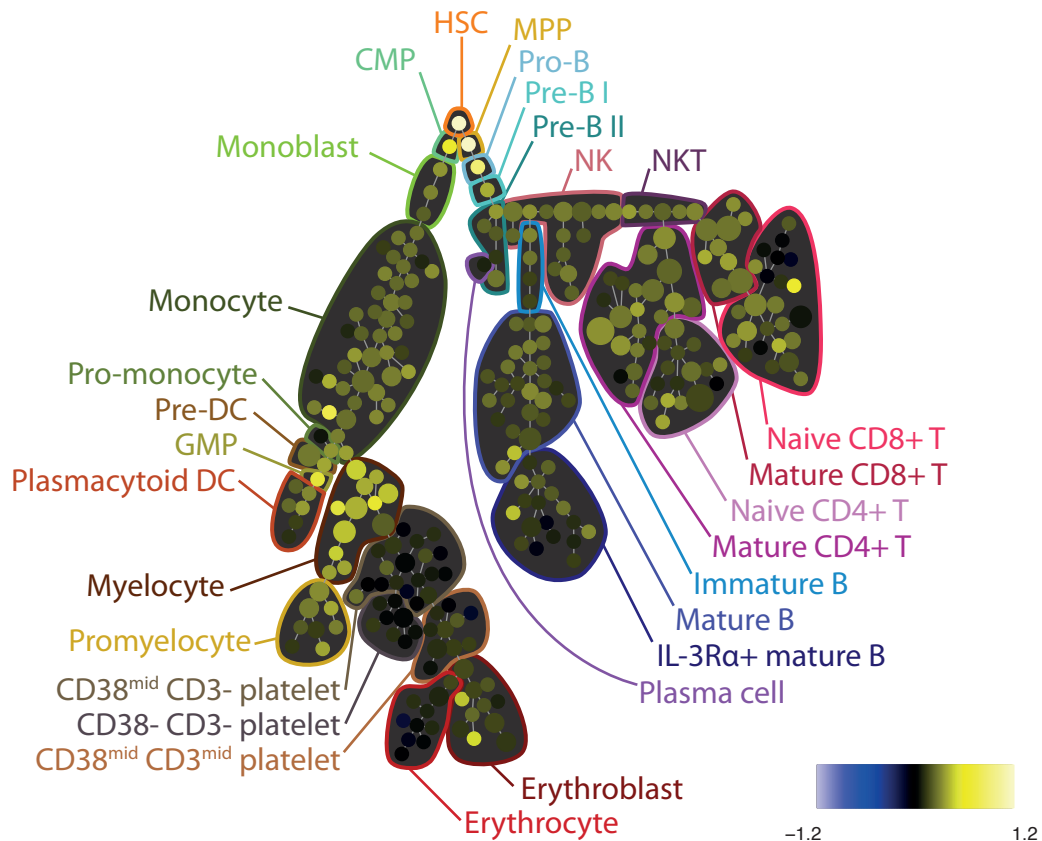

Figure S8A

176-pCREB ---- TNFa vs Ref Ratio

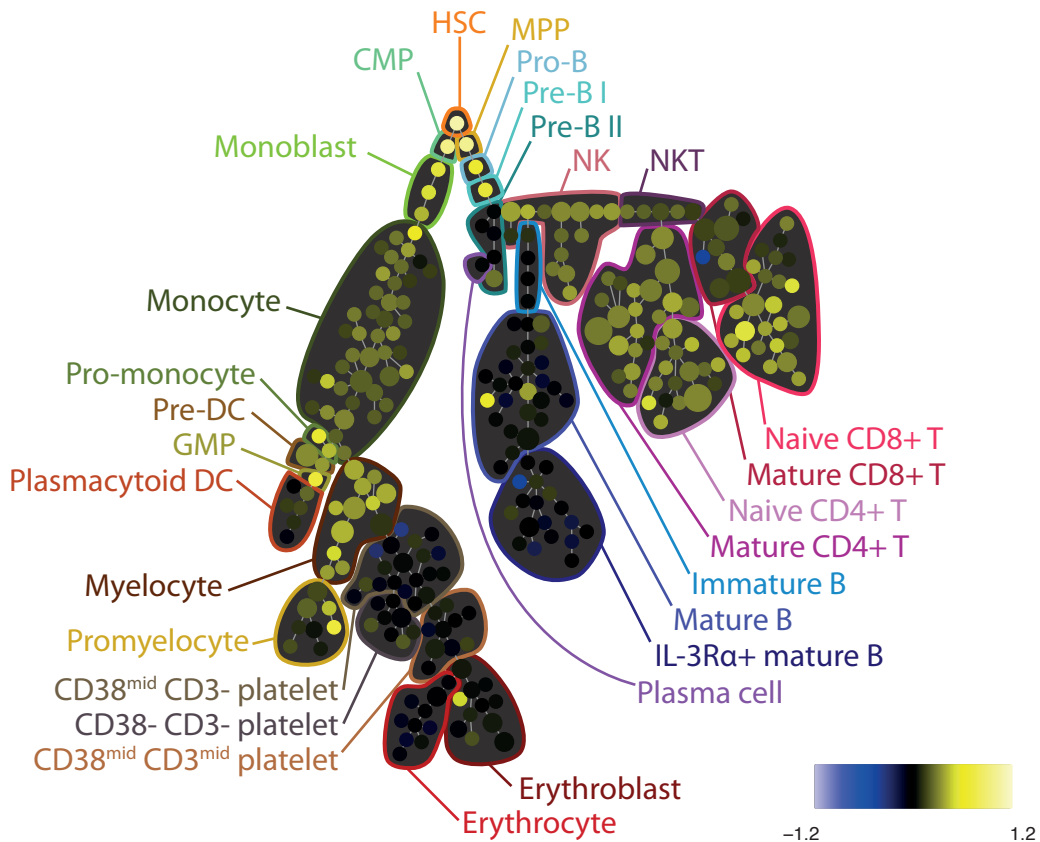

Figure S8A

176-pCREB ---- TPO vs Ref Ratio

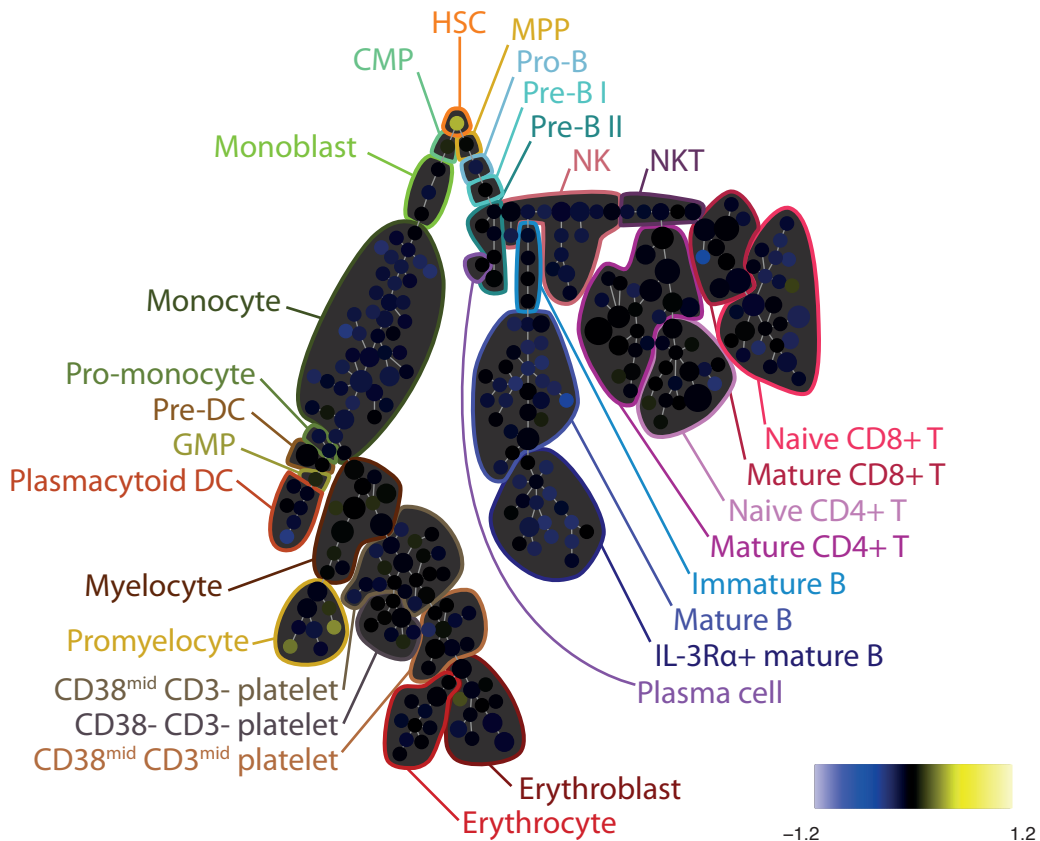

Figure S8B

141-pPLCgamma2 — Dasatinib+BCR vs Ref Ratio

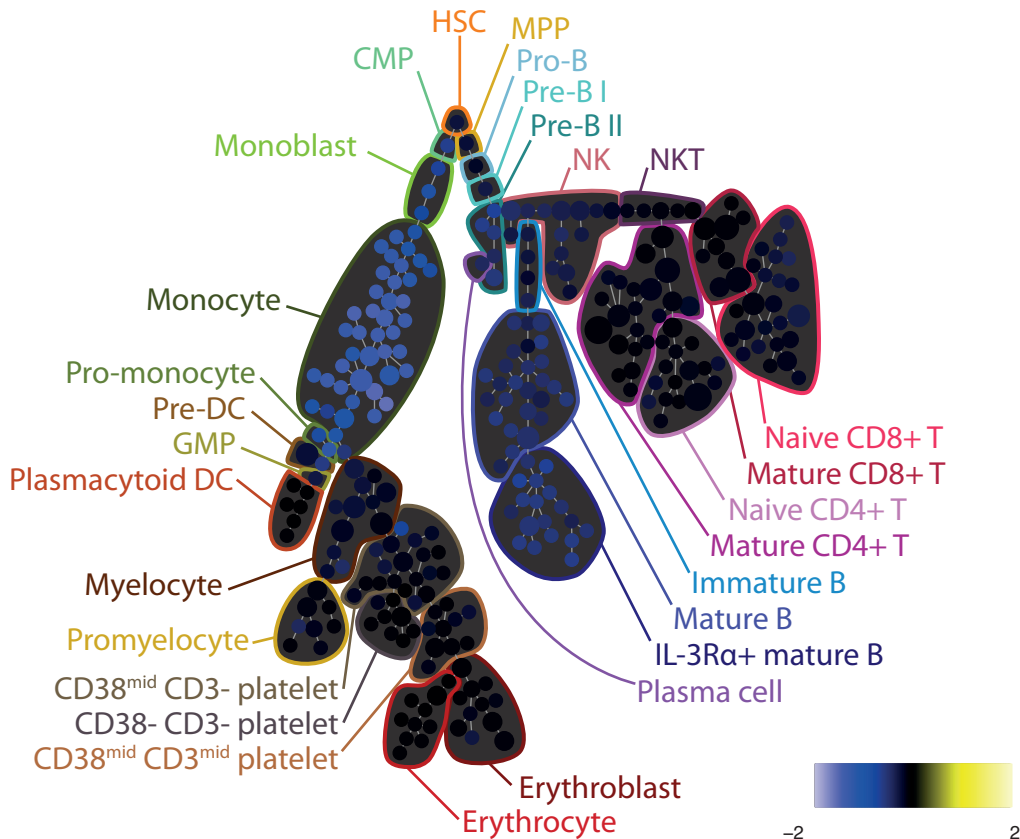

Figure S8B

141-pPLCgamma2 ---- Dasatinib+Flt3L vs Ref Ratio

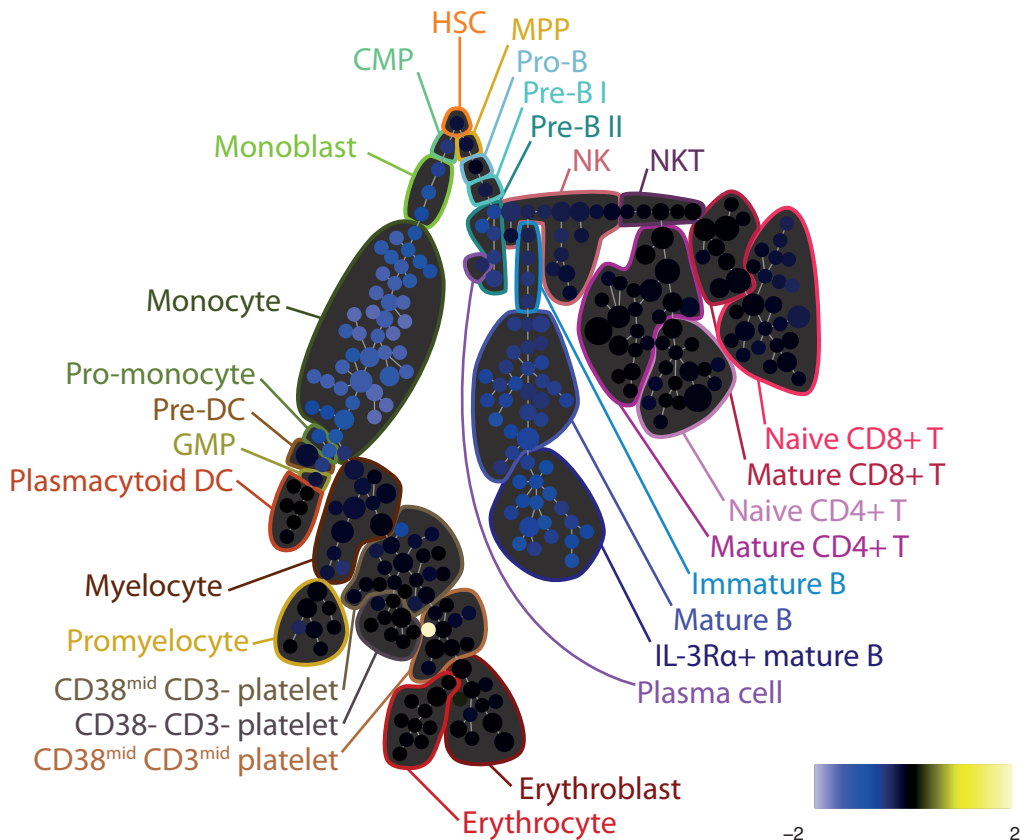

Figure S8B

141-pPLCgamma2 ---- Dasatinib+IL7 vs Ref Ratio

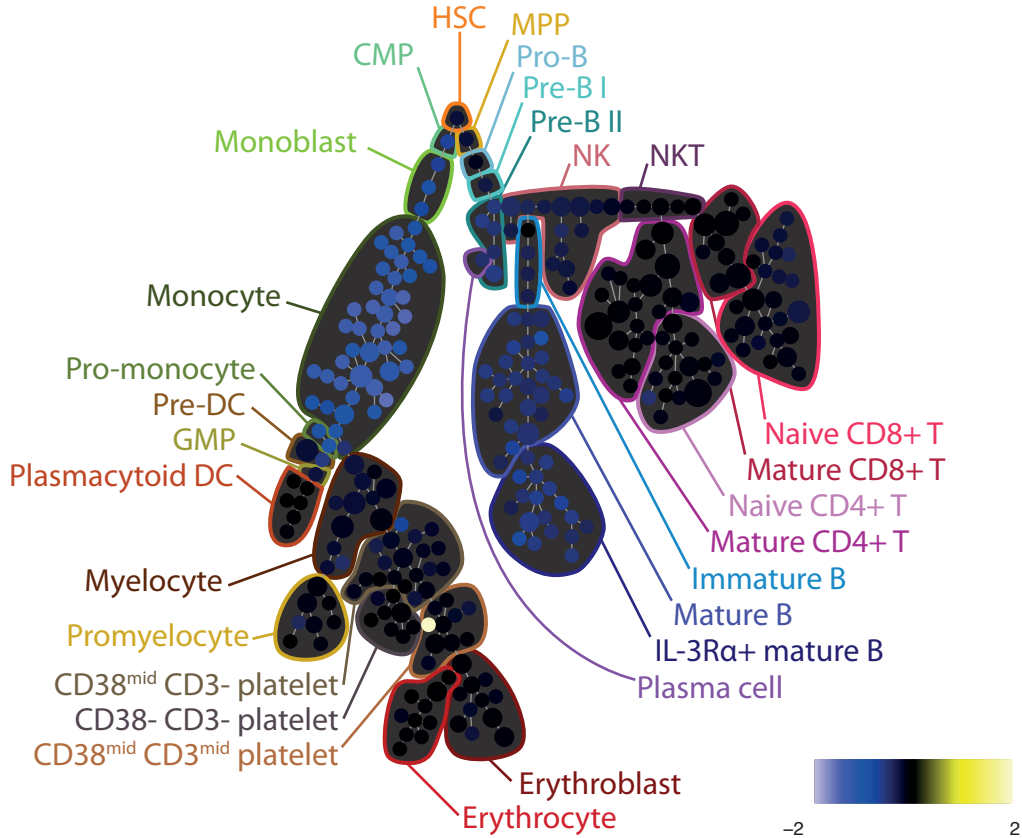

Figure S8B

141-pPLCgamma2 --- Dasatinib+PMAiono vs Ref Ratio

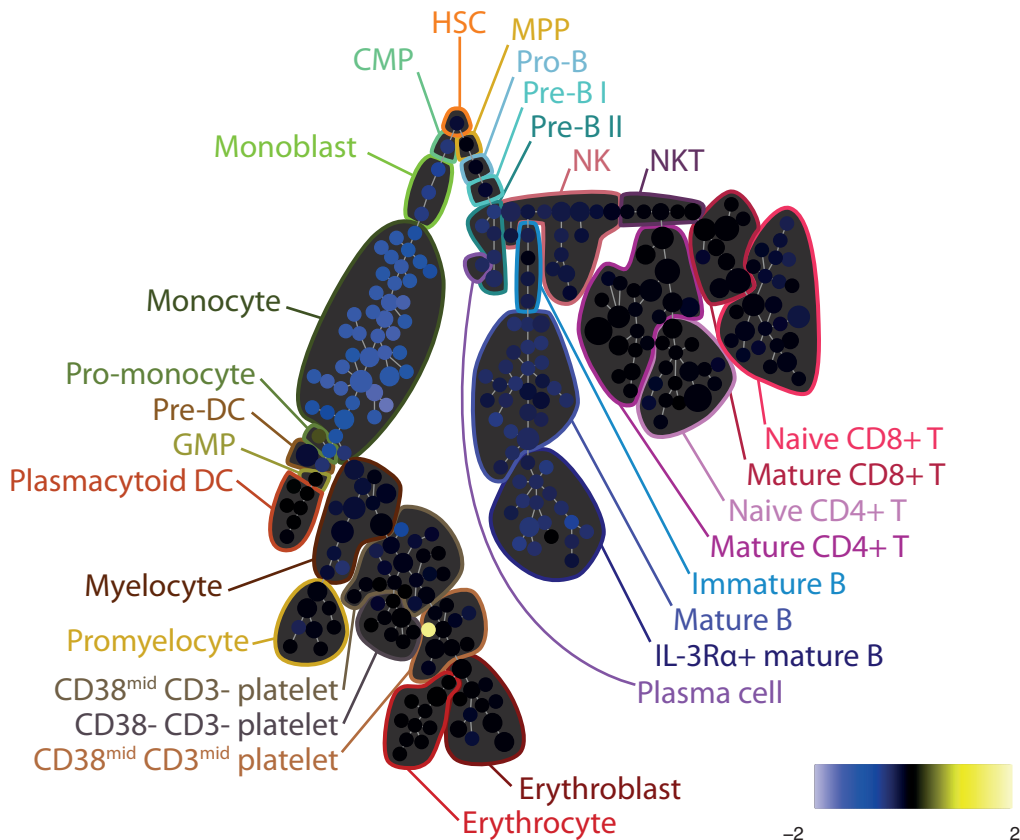



Figure S8B

141-pPLCgamma2 ---- Dasatinib+PVO4 vs Ref Ratio

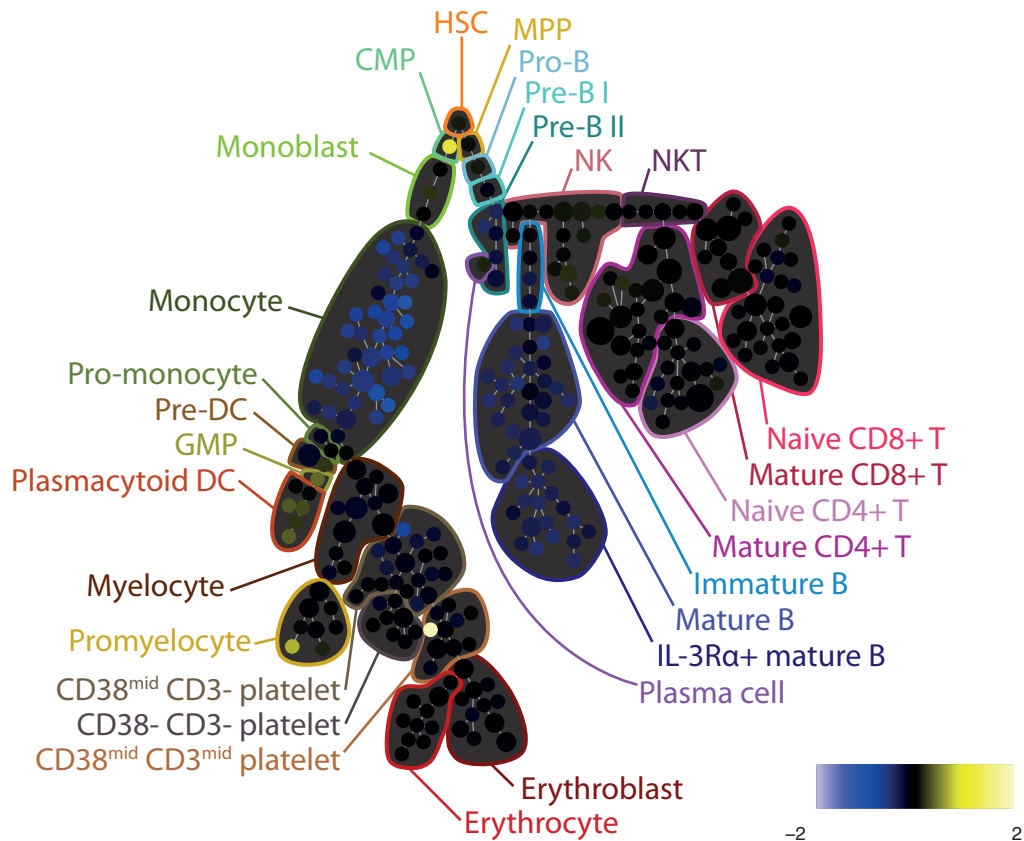

Figure S8B

141-pPLCgamma2 ---- Dasatinib+Unstim vs Ref Ratio

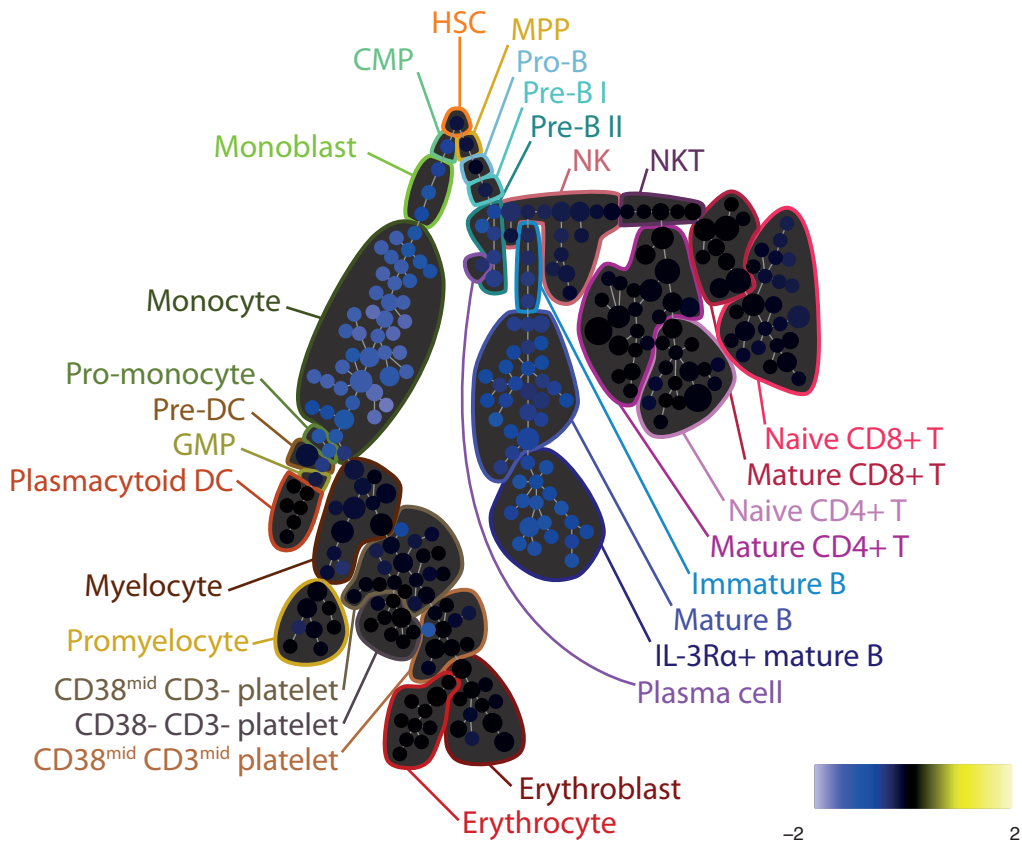

Figure S8B

150-pSTAT5 ---- Dasatinib+BCR vs Ref Ratio

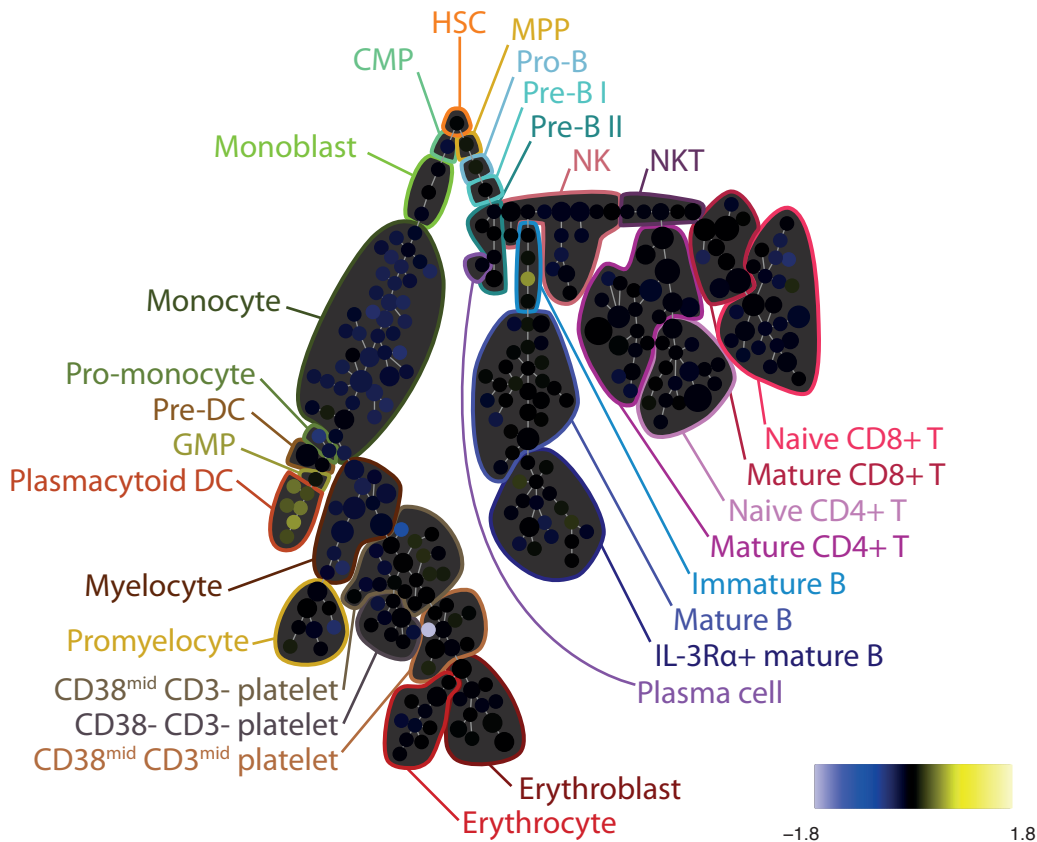

Figure S8B

150-pSTAT5 ---- Dasatinib+Flt3L vs Ref Ratio

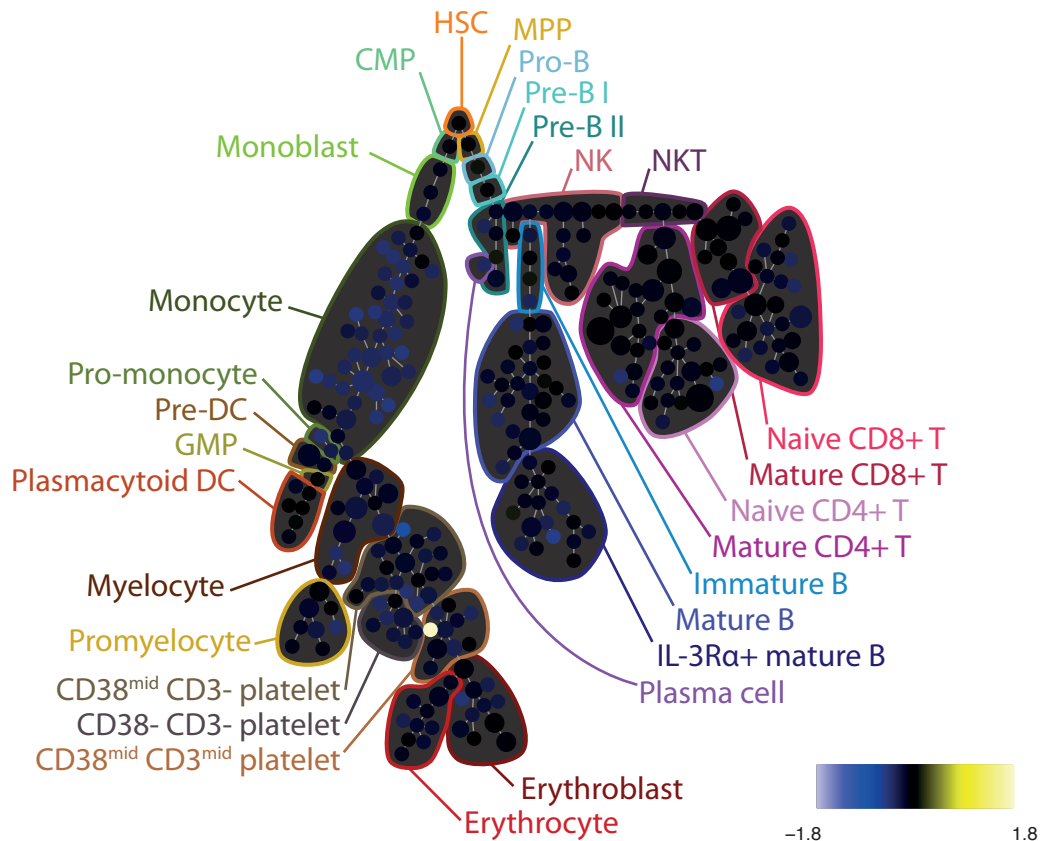

Figure S8B

150-pSTAT5 ---- Dasatinib+IL7 vs Ref Ratio

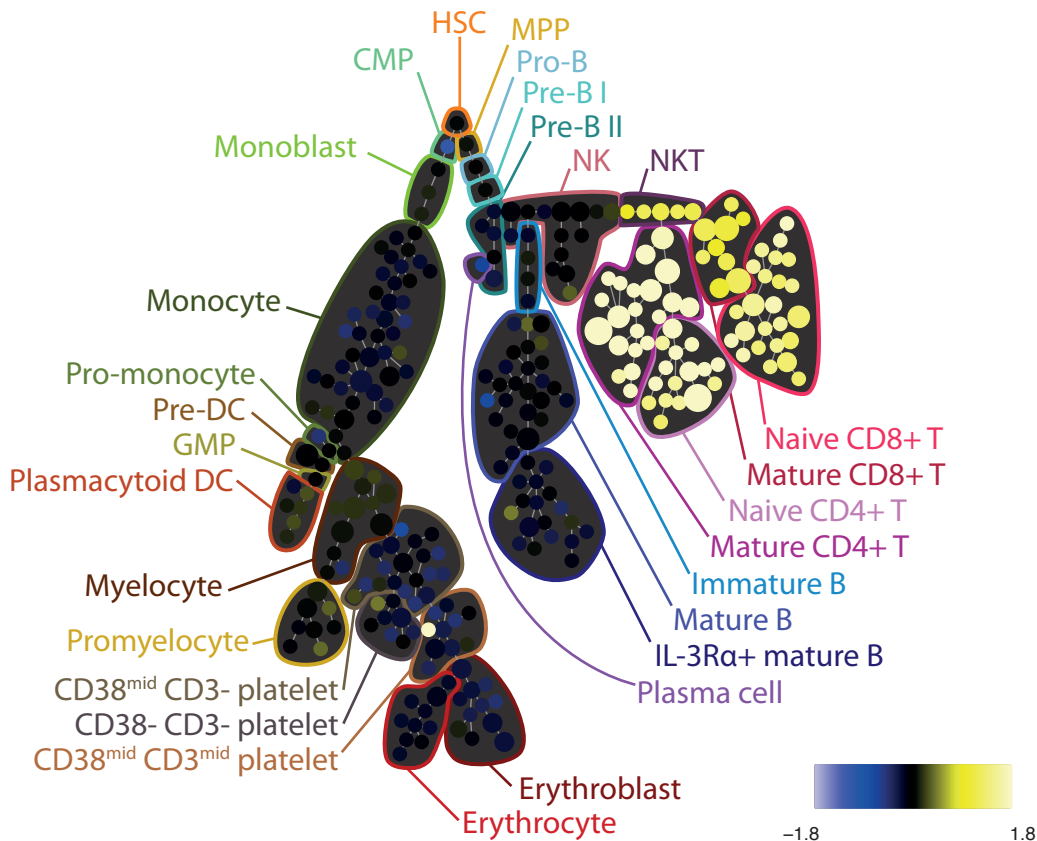

Figure S8B

150-pSTAT5 ---- Dasatinib+PMAiono vs Ref Ratio

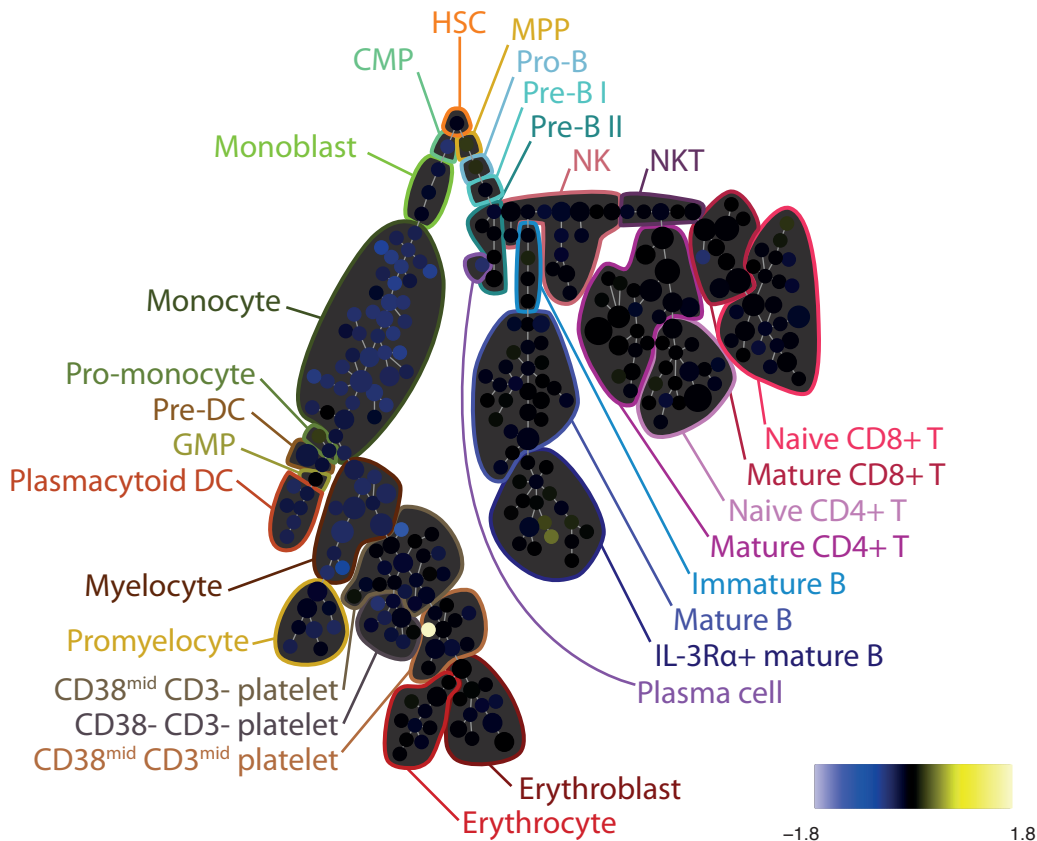

Figure S8B

150-pSTAT5 ---- Dasatinib+PVO4 vs Ref Ratio

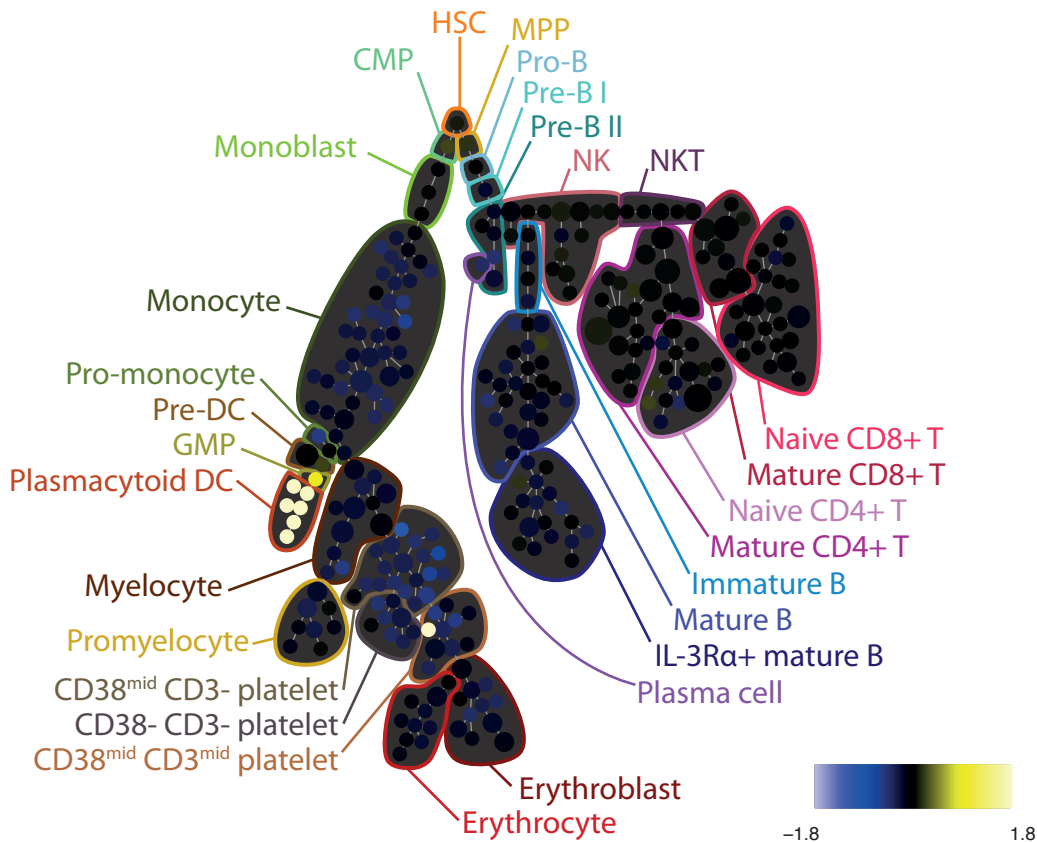

Figure S8B

150-pSTAT5 ---- Dasatinib+Unstim vs Ref Ratio

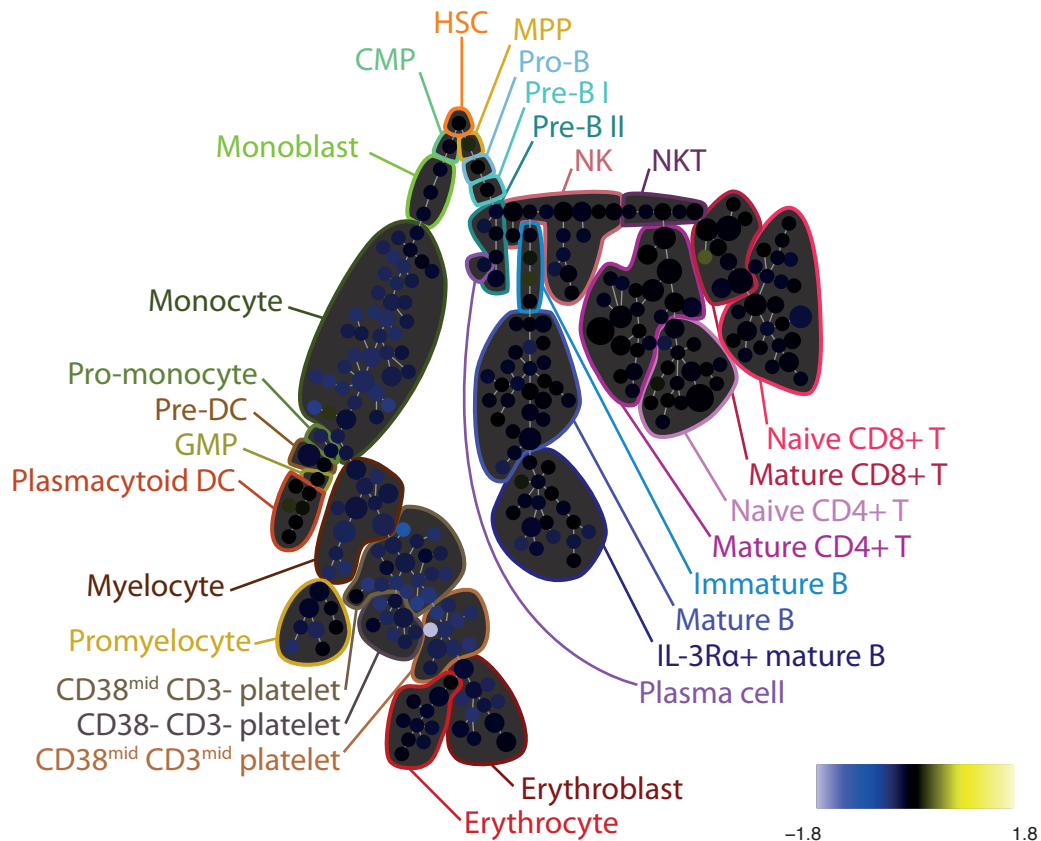



Figure S8B

151-pERK1/2 ---- Dasatinib+BCR vs Ref Ratio

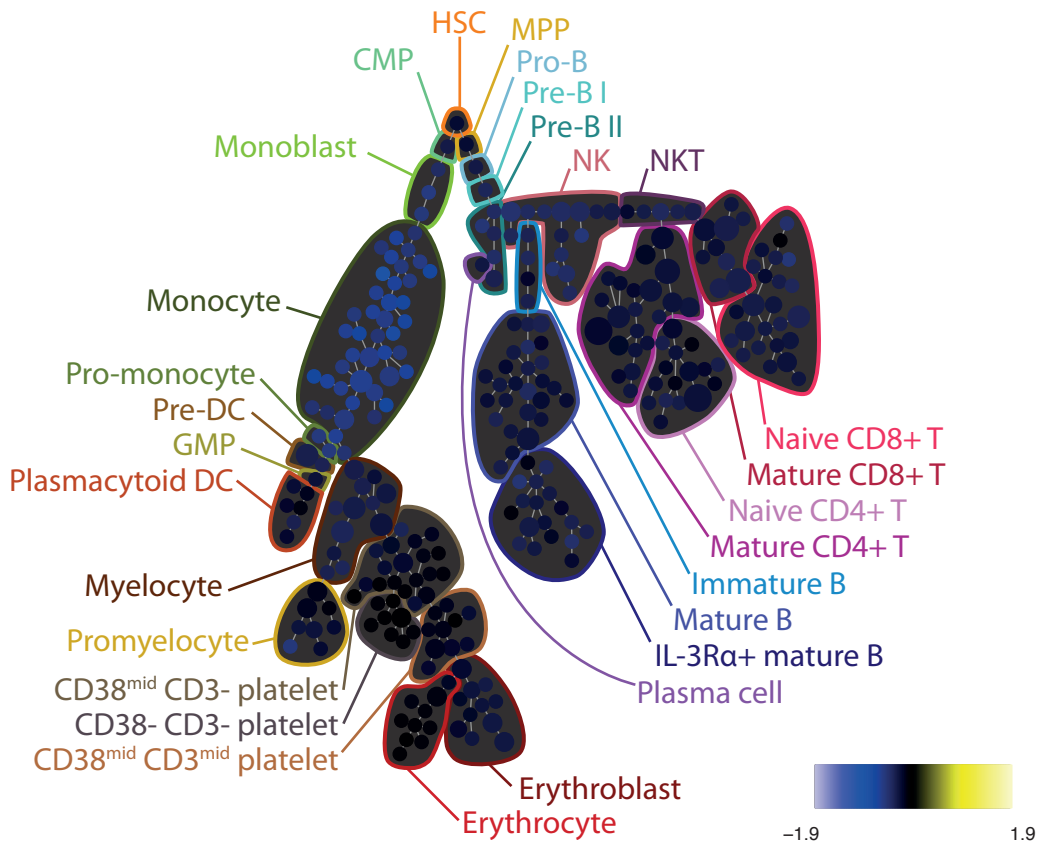

Figure S8B

151-pERK1/2 ---- Dasatinib+Flt3L vs Ref Ratio

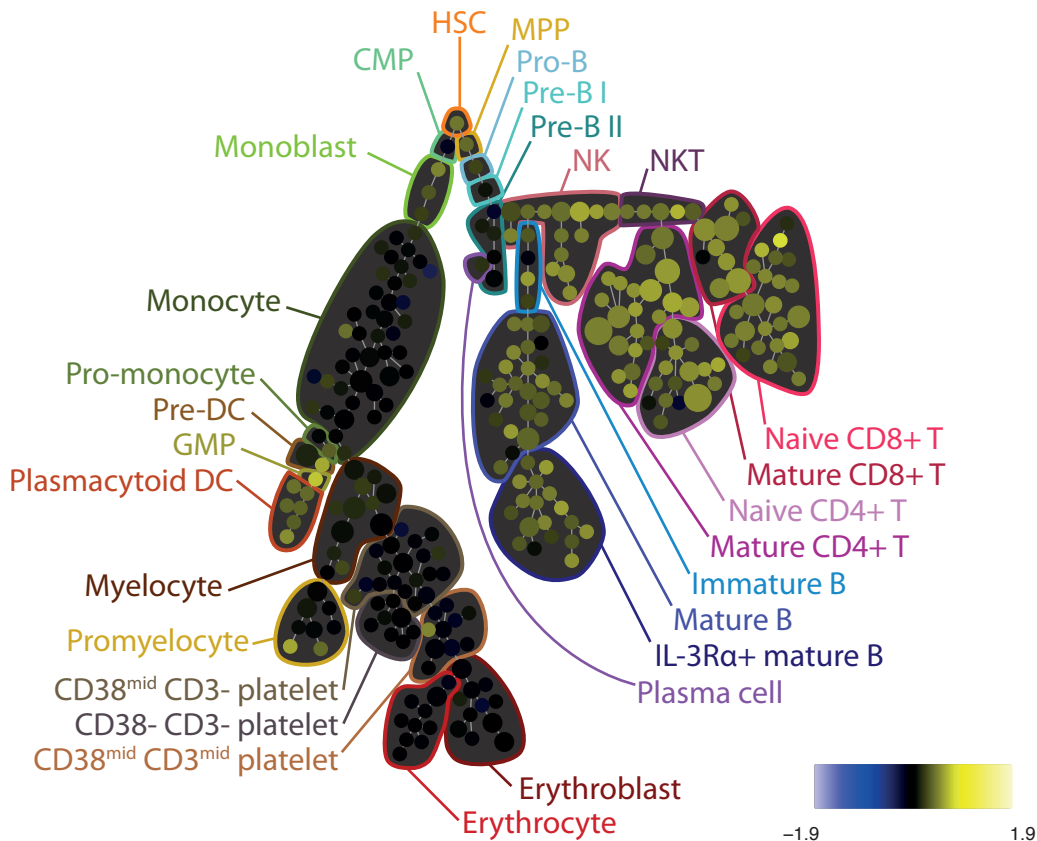

Figure S8B

151-pERK1/2 ---- Dasatinib+IL7 vs Ref Ratio

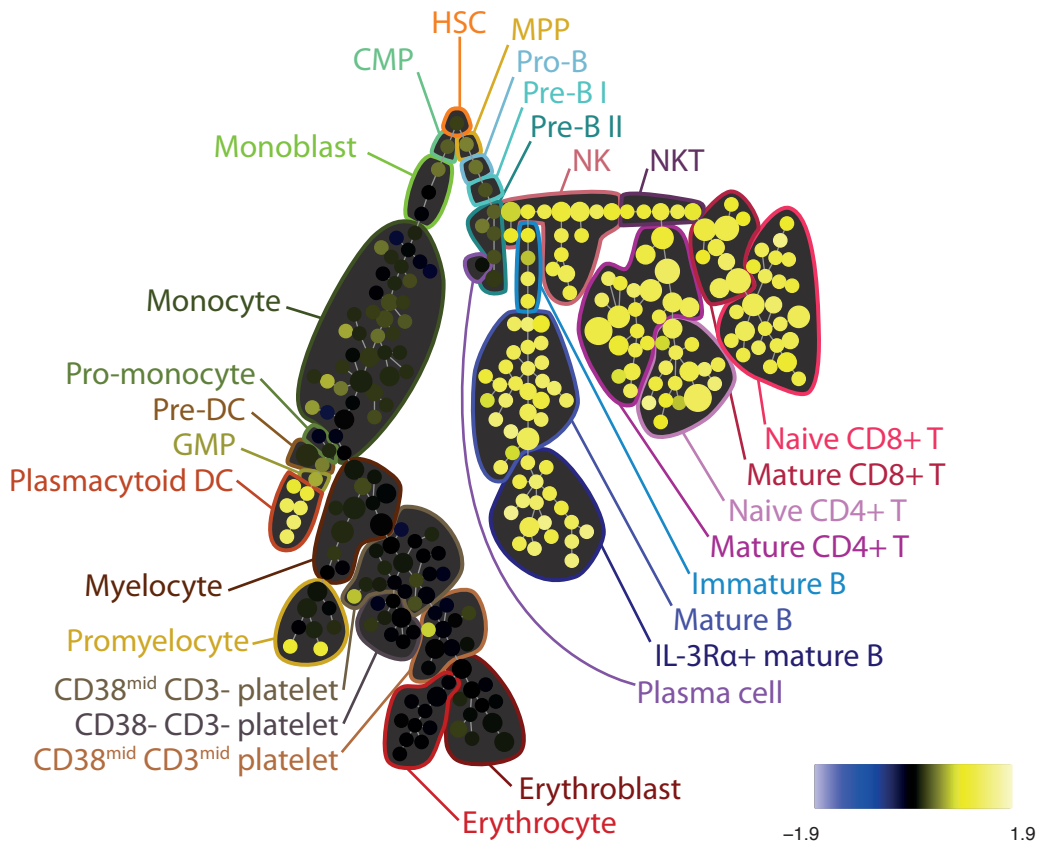

Figure S8B

151-pERK1/2 --- Dasatinib+PMAiono vs Ref Ratio

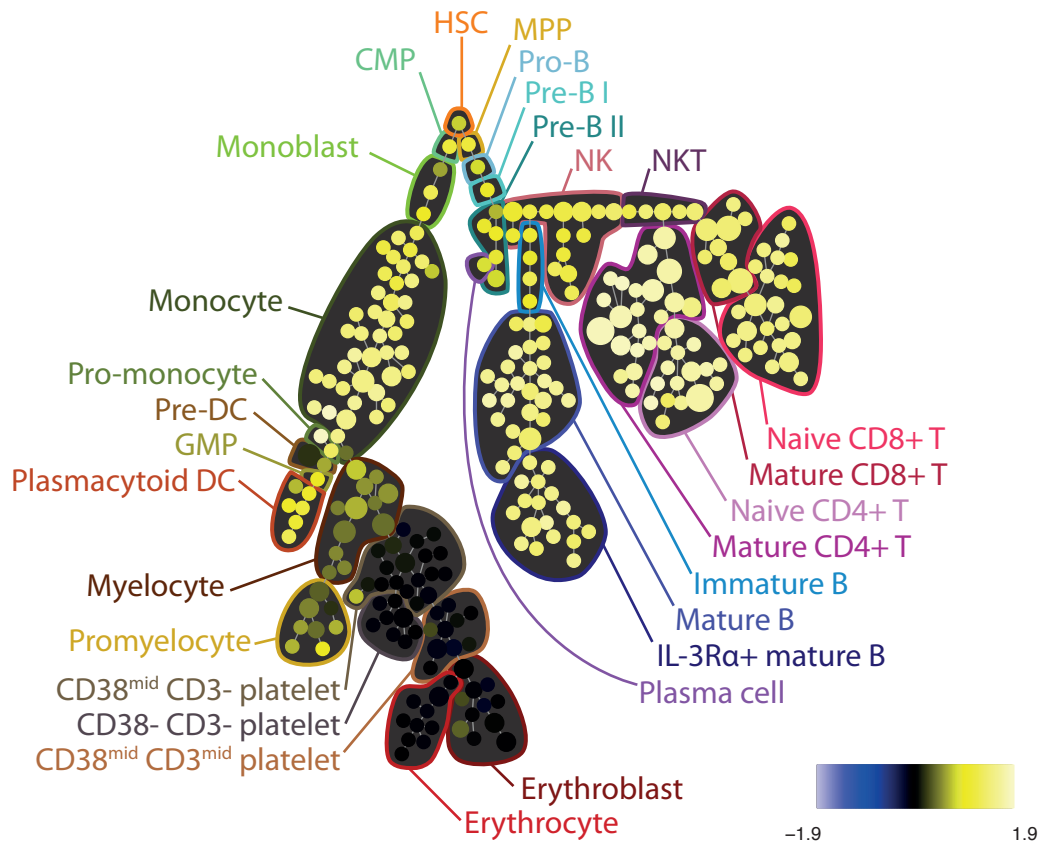

Figure S8B

151-pERK1/2 ---- Dasatinib+PVO4 vs Ref Ratio

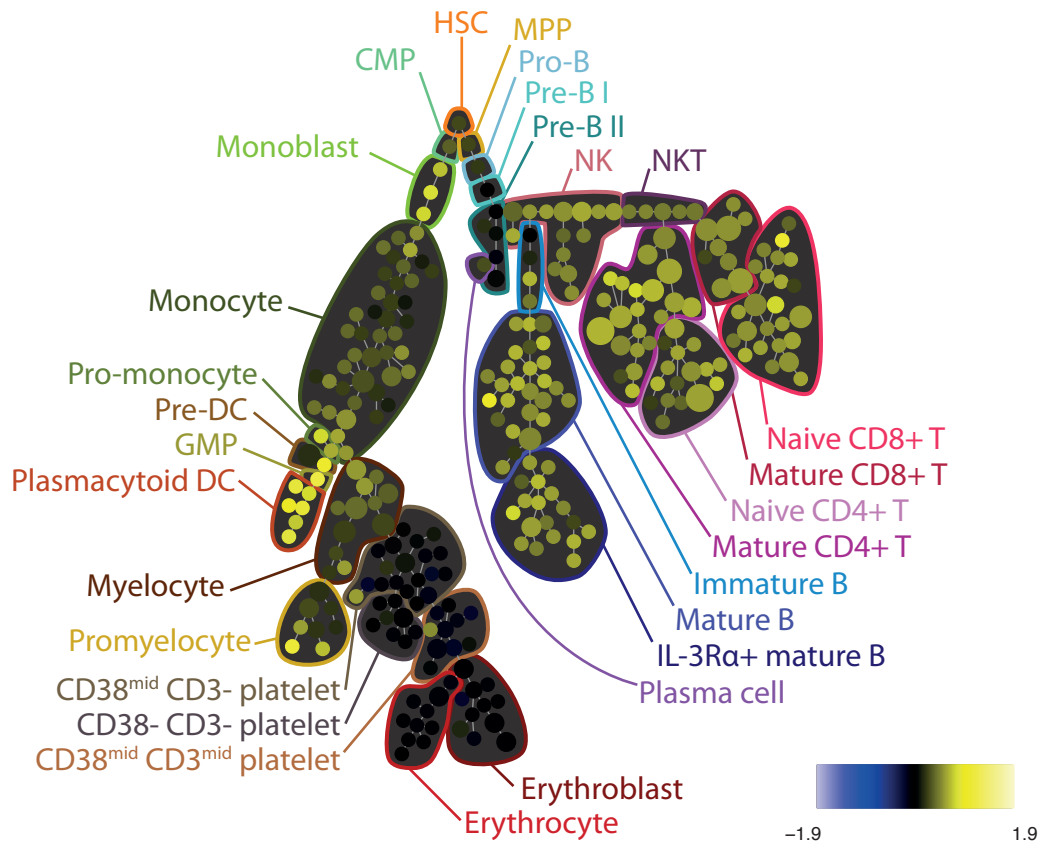

Figure S8B

151-pERK1/2 ---- Dasatinib+Unstim vs Ref Ratio

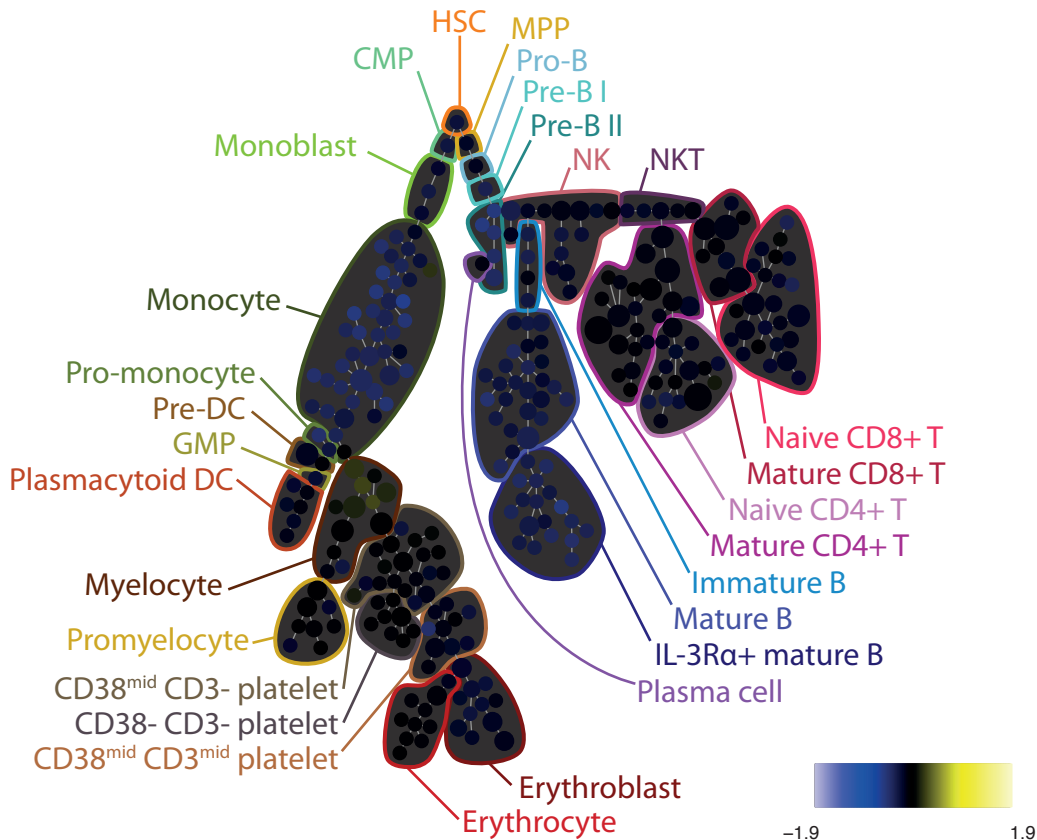

Figure S8B

152-Ki67 --- Dasatinib+BCR vs Ref Ratio

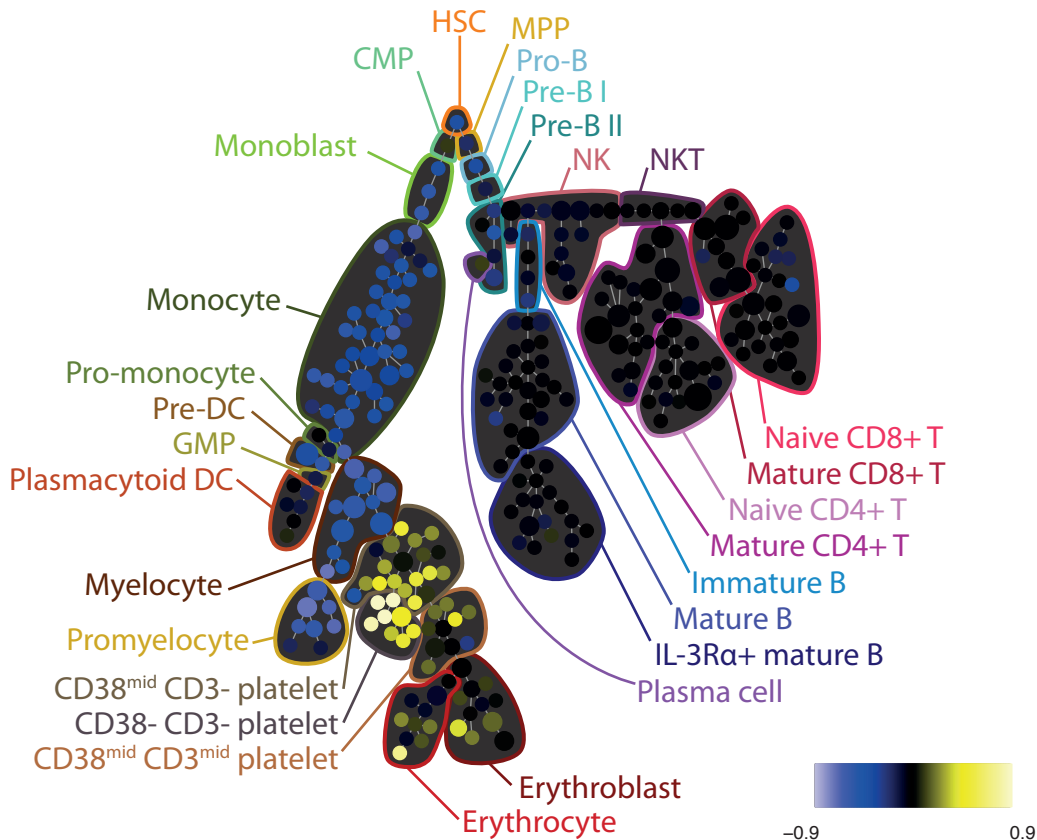

Figure S8B

152-Ki67 ---- Dasatinib+Flt3L vs Ref Ratio

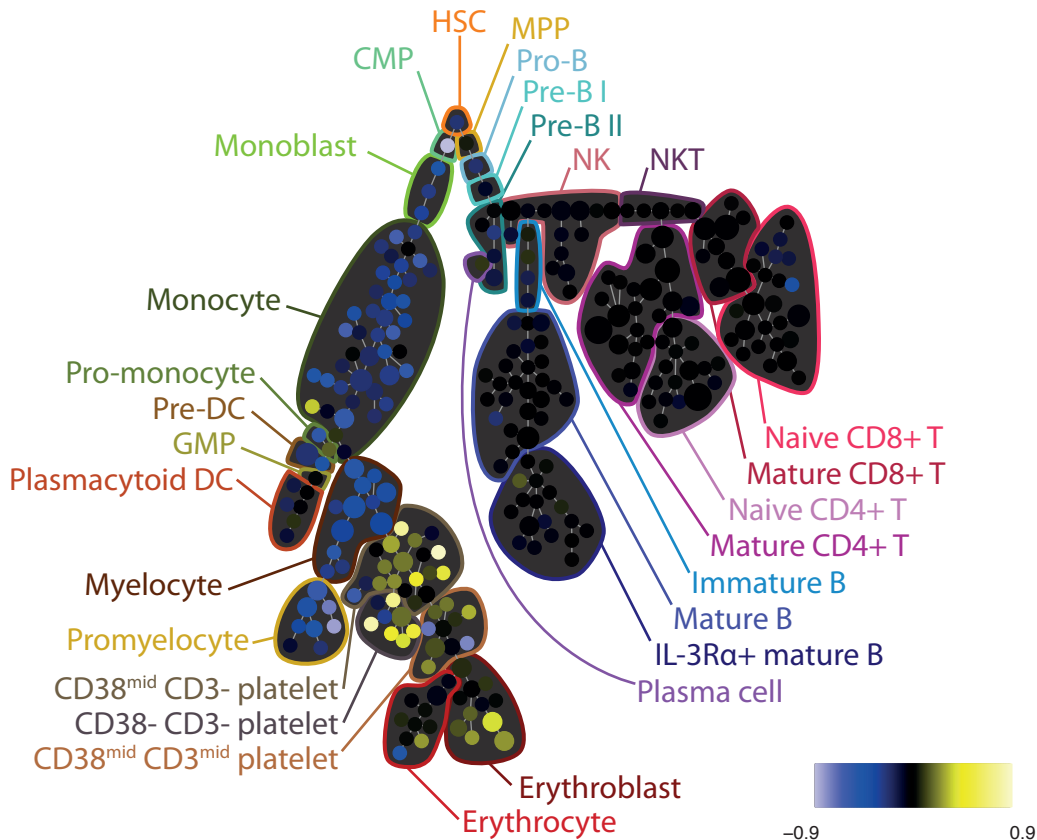



Figure S8B

152-Ki67 ---- Dasatinib+IL7 vs Ref Ratio

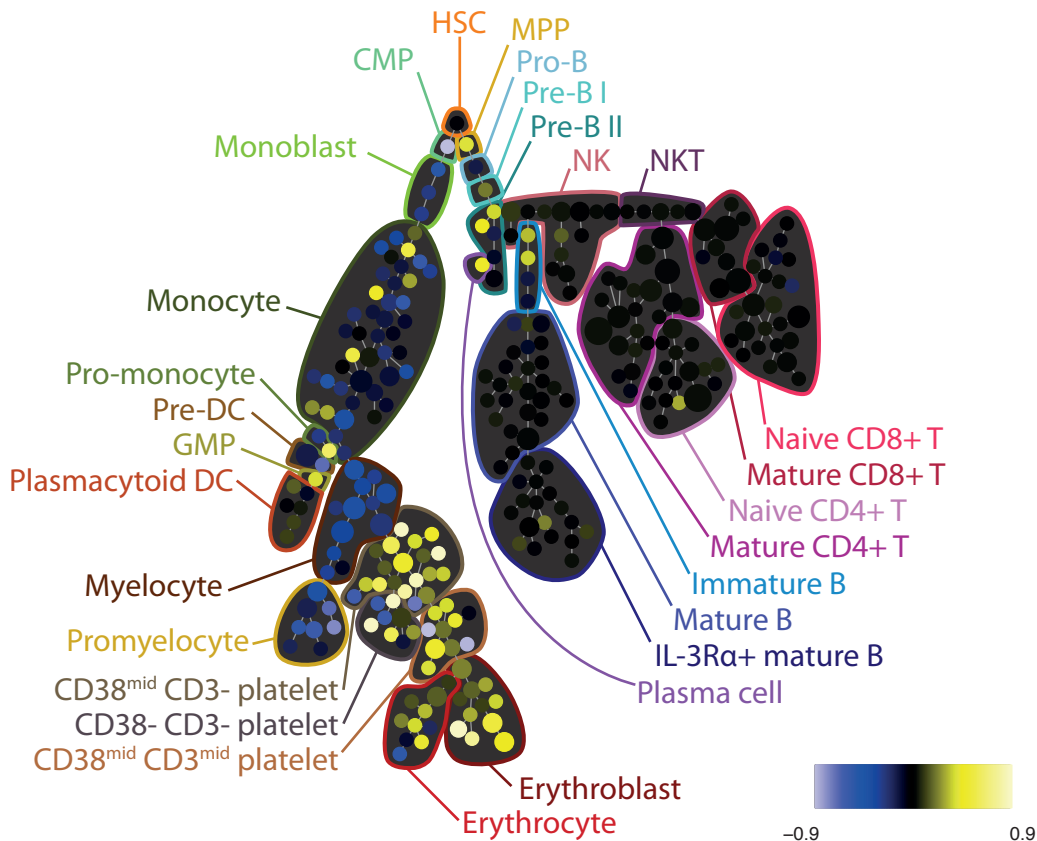

Figure S8B

152-Ki67 ---- Dasatinib+PMAiono vs Ref Ratio

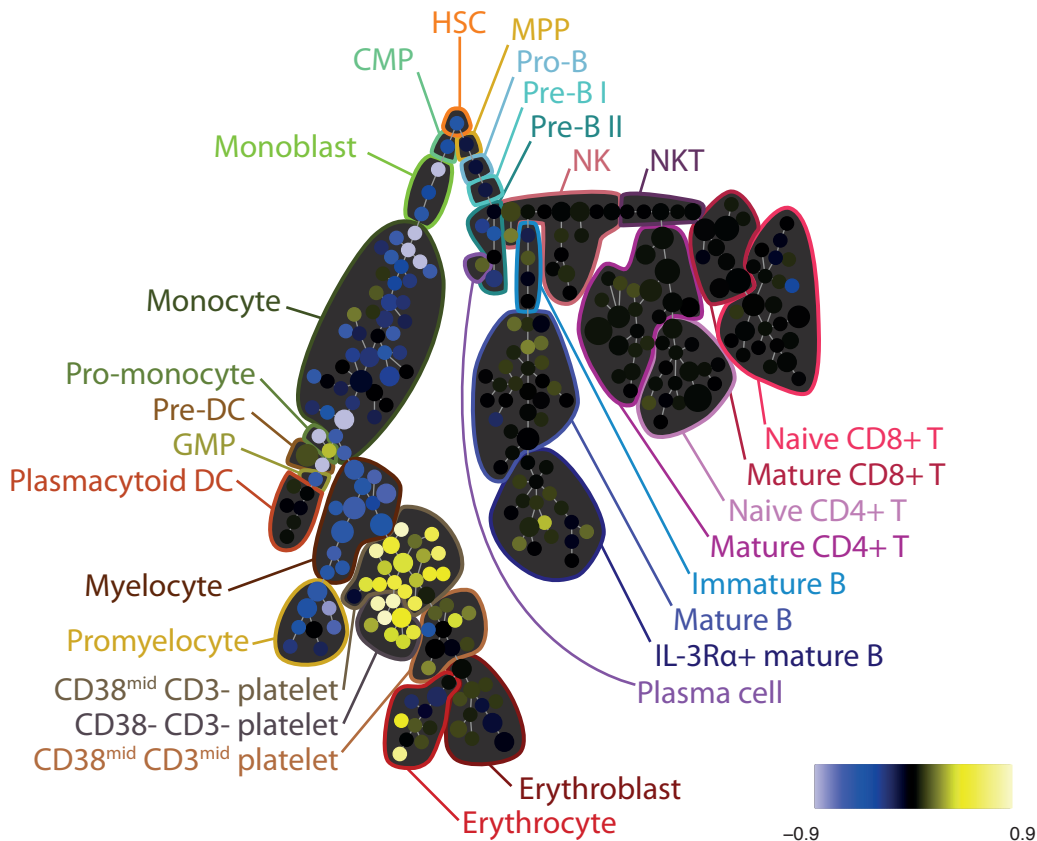

Figure S8B

152-Ki67 ---- Dasatinib+PVO4 vs Ref Ratio

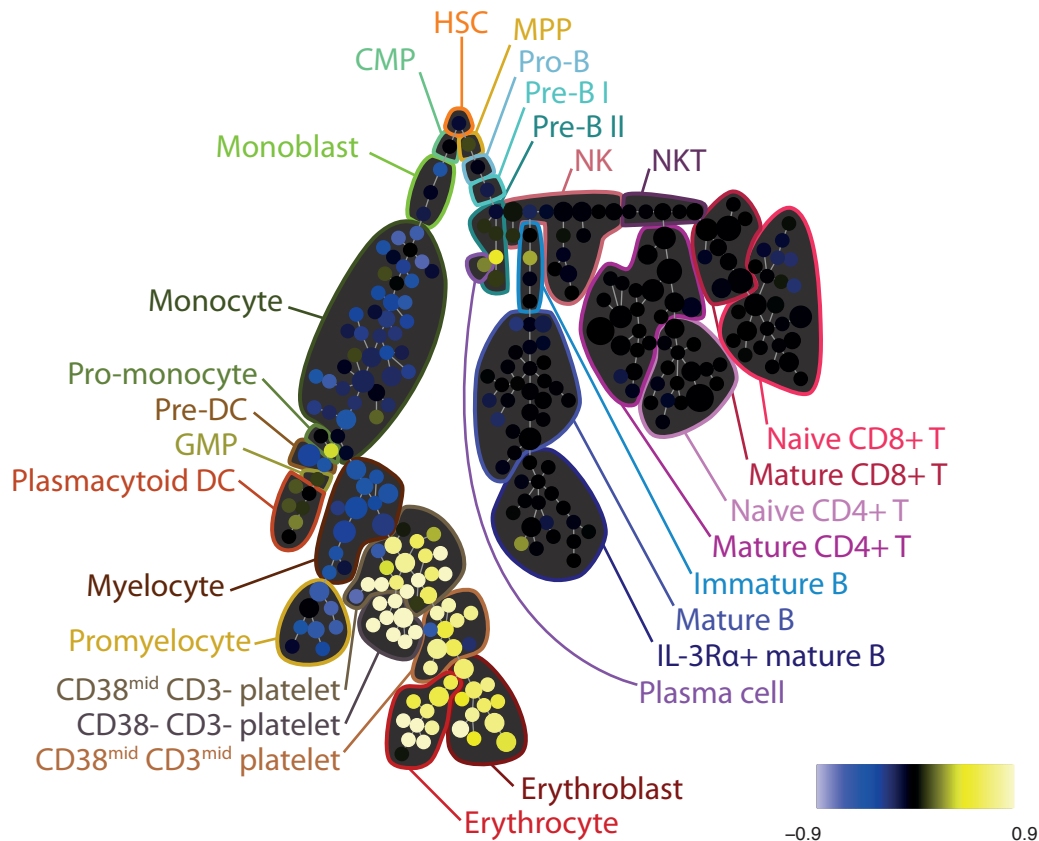

Figure S8B

152-Ki67 ---- Dasatinib+Unstim vs Ref Ratio

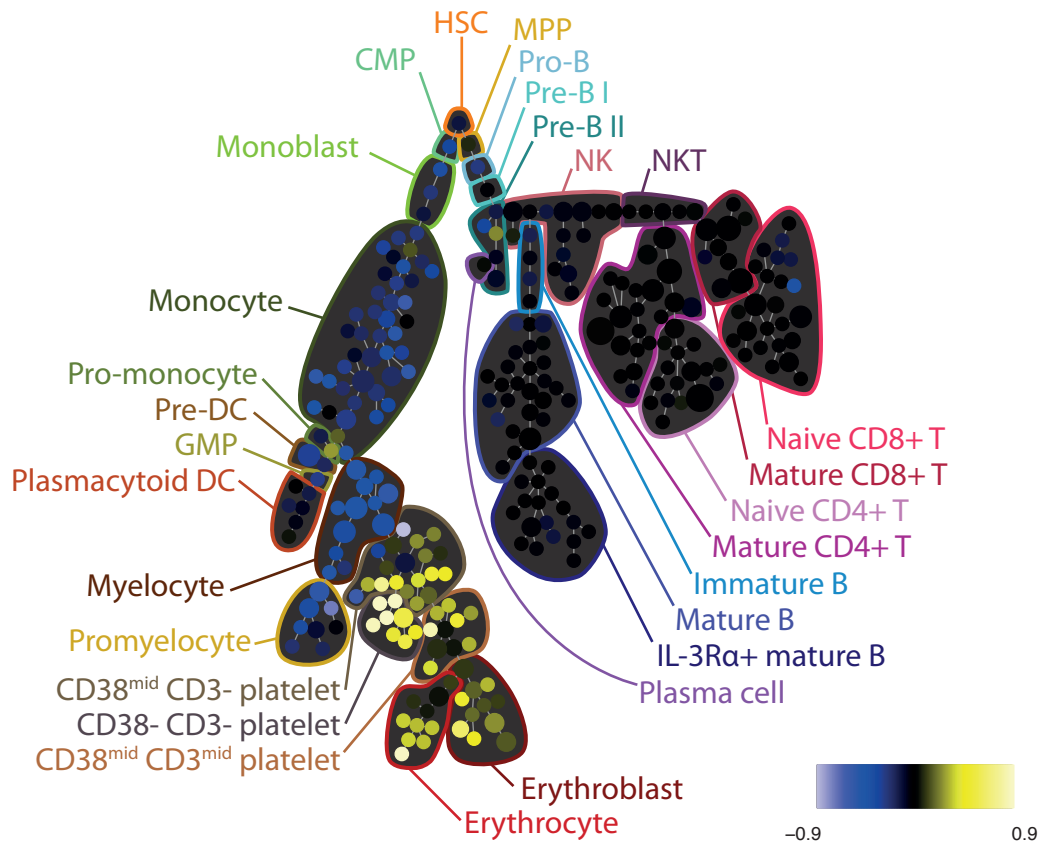

Figure S8B

153-pMAPKAPK2 ---- Dasatinib+BCR vs Ref Ratio

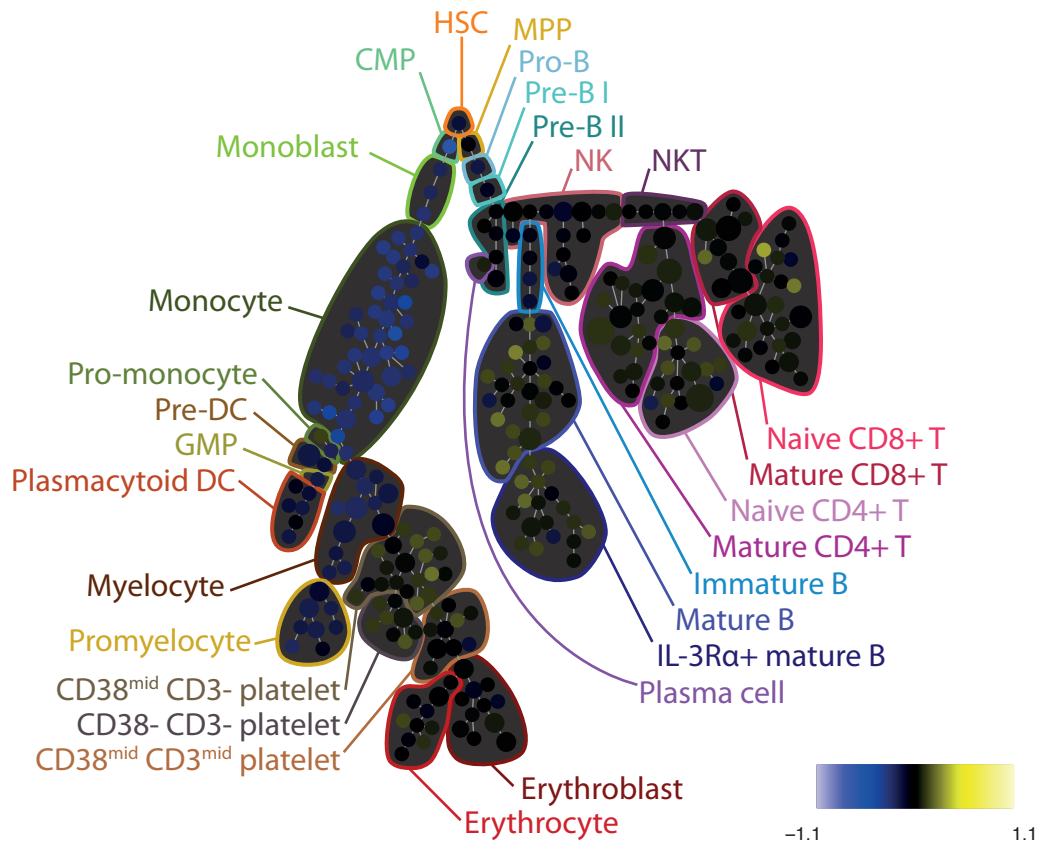

Figure S8B

153-pMAPKAPK2 ---- Dasatinib+Flt3L vs Ref Ratio

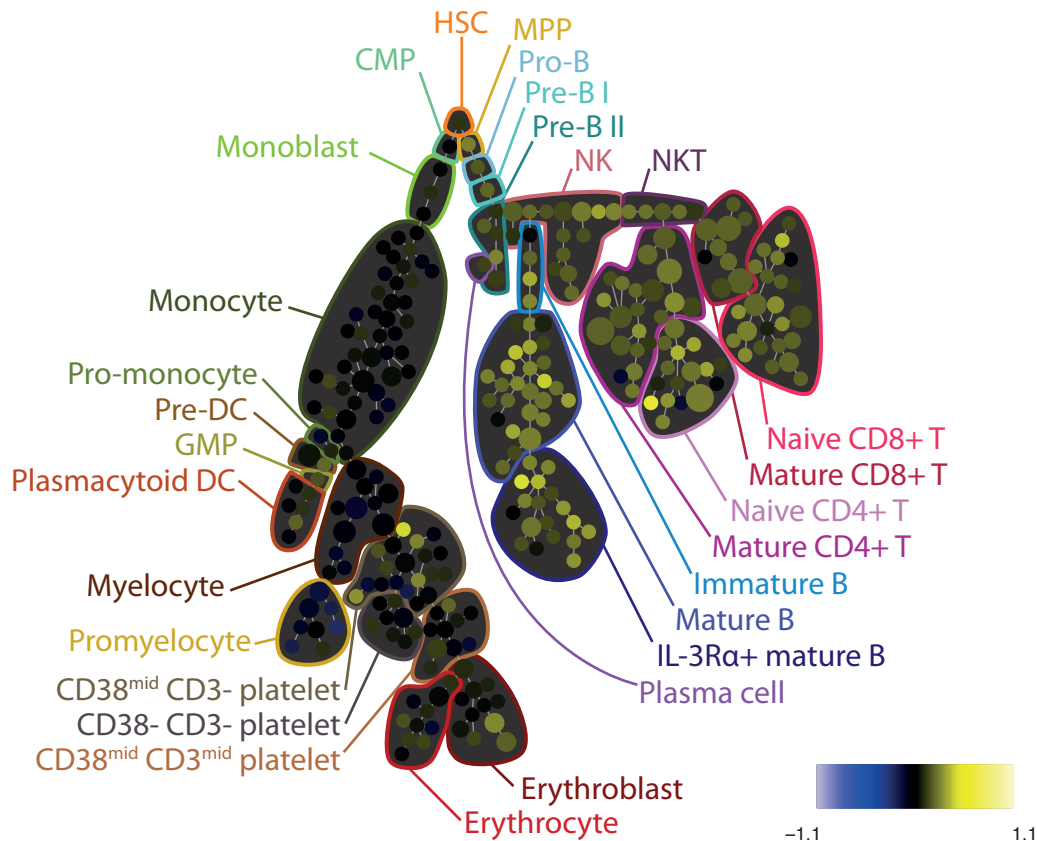

Figure S8B

153-pMAPKAPK2 ---- Dasatinib+IL7 vs Ref Ratio

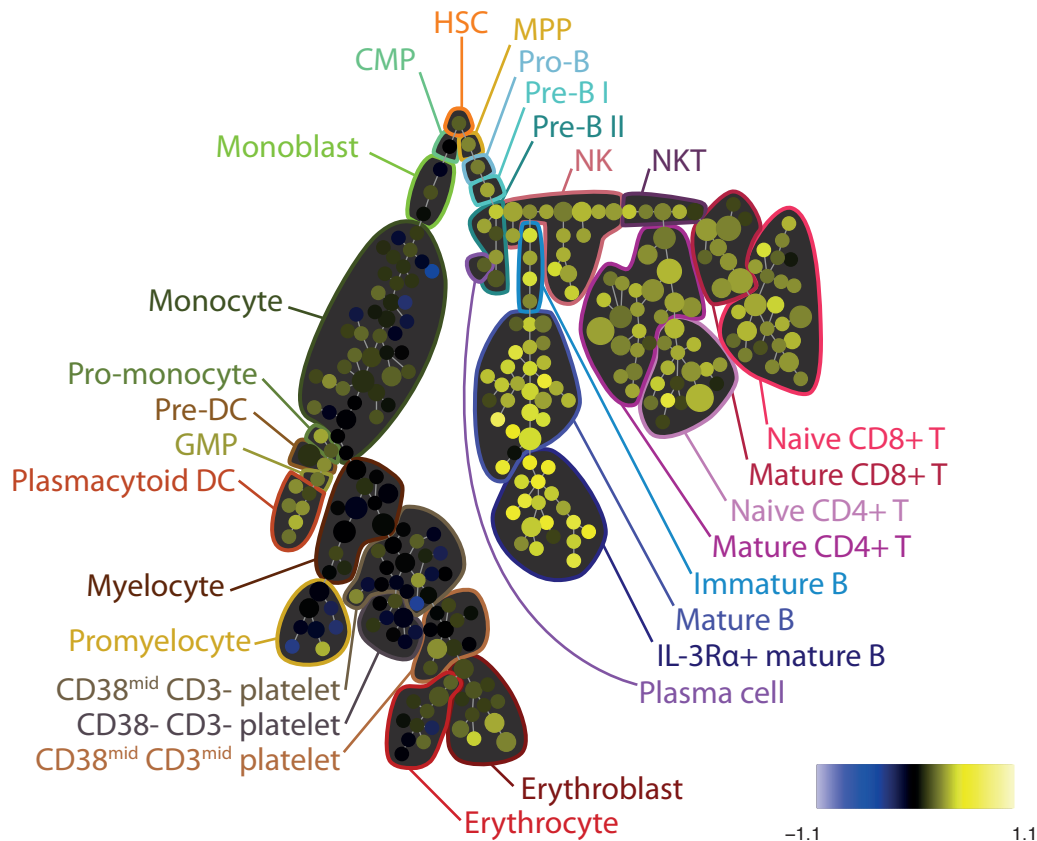

Figure S8B

153-pMAPKAPK2 ---- Dasatinib+PMAiono vs Ref Ratio

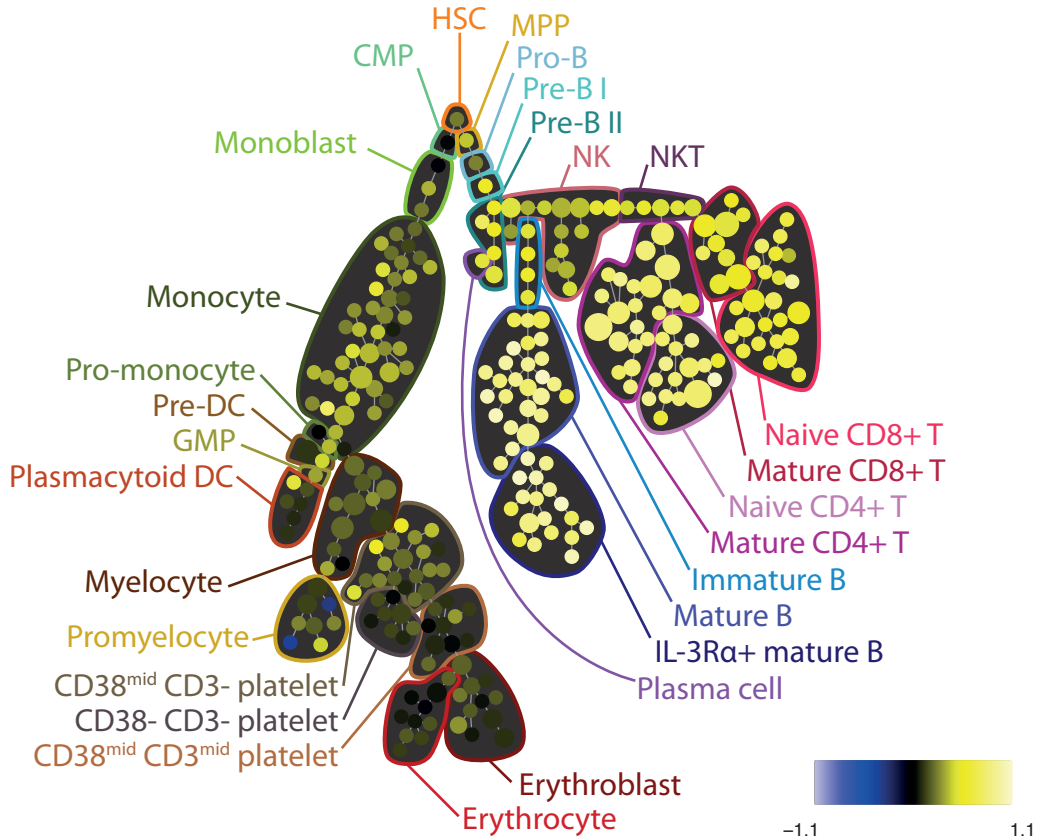



Figure S8B

153-pMAPKAPK2 ---- Dasatinib+PVO4 vs Ref Ratio

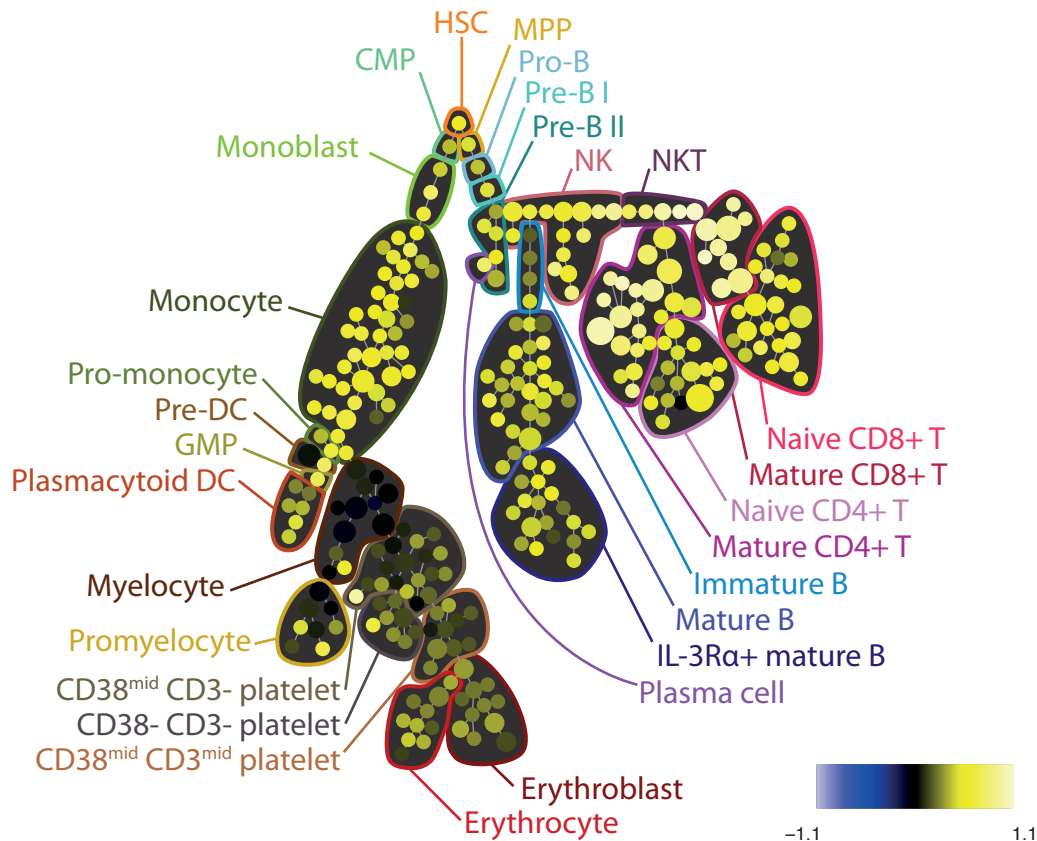

Figure S8B

153-pMAPKAPK2 ---- Dasatinib+Unstim vs Ref Ratio

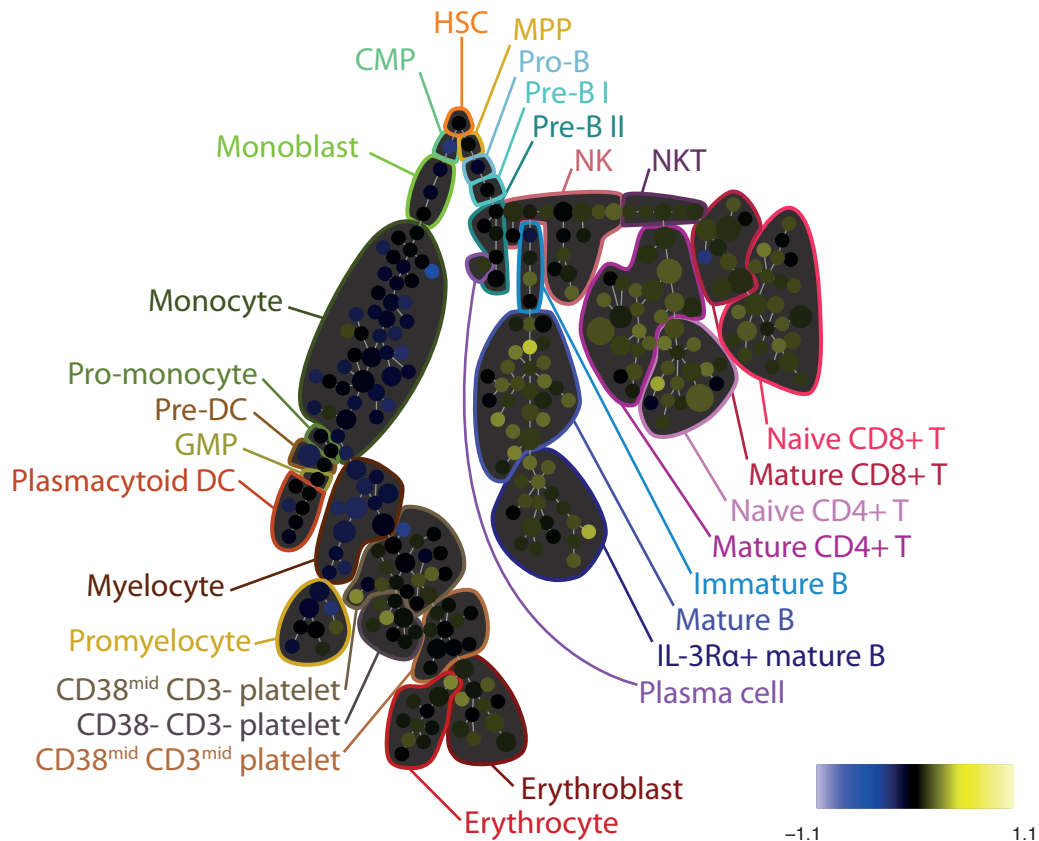

Figure S8B

154-pSHP2 --- Dasatinib+BCR vs Ref Ratio

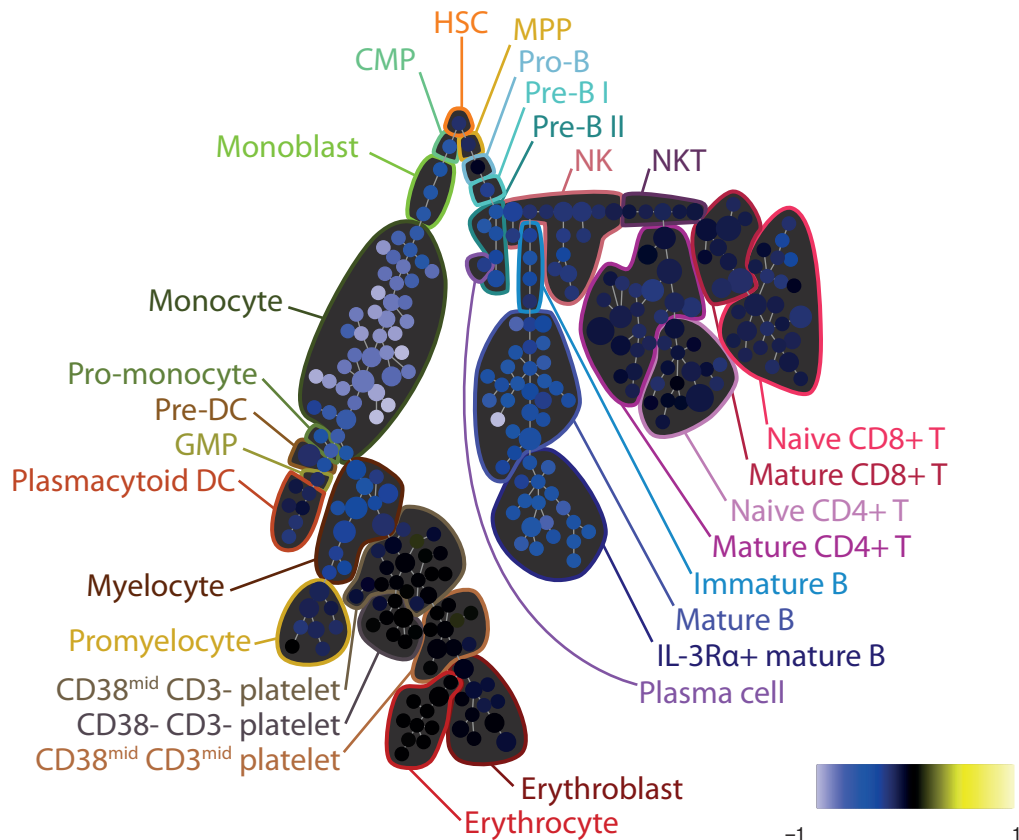

Figure S8B

154-pSHP2 ---- Dasatinib+Flt3L vs Ref Ratio

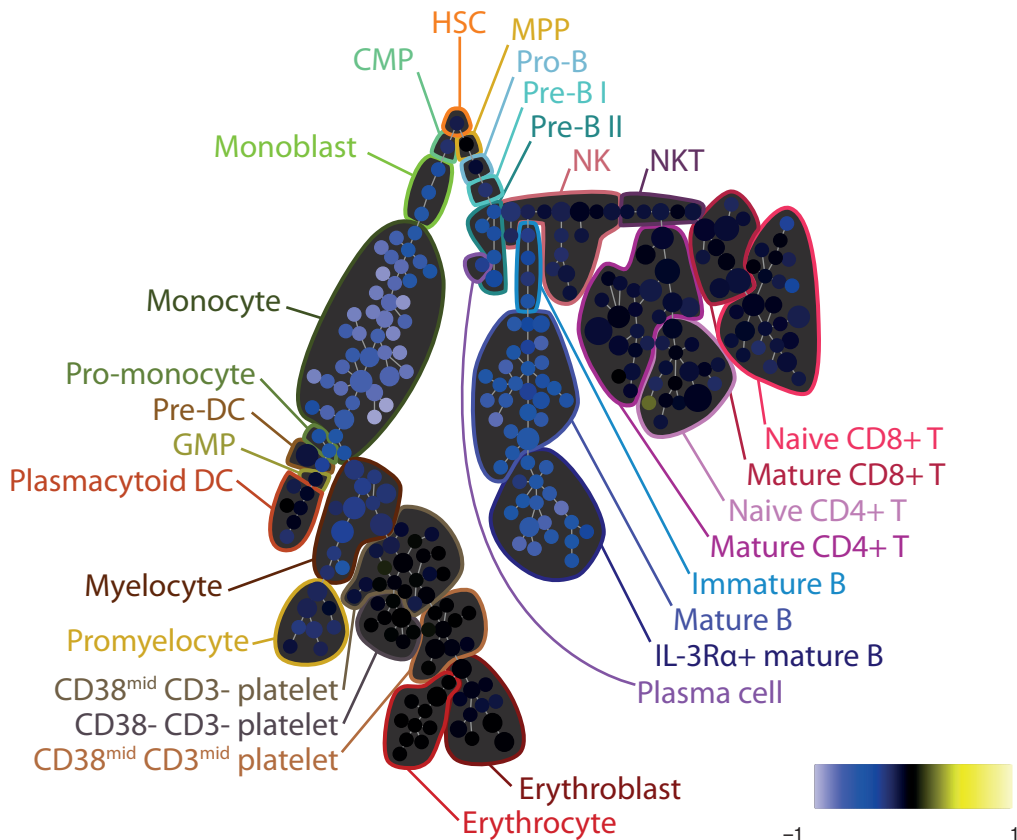

Figure S8B

154-pSHP2 ---- Dasatinib+IL7 vs Ref Ratio

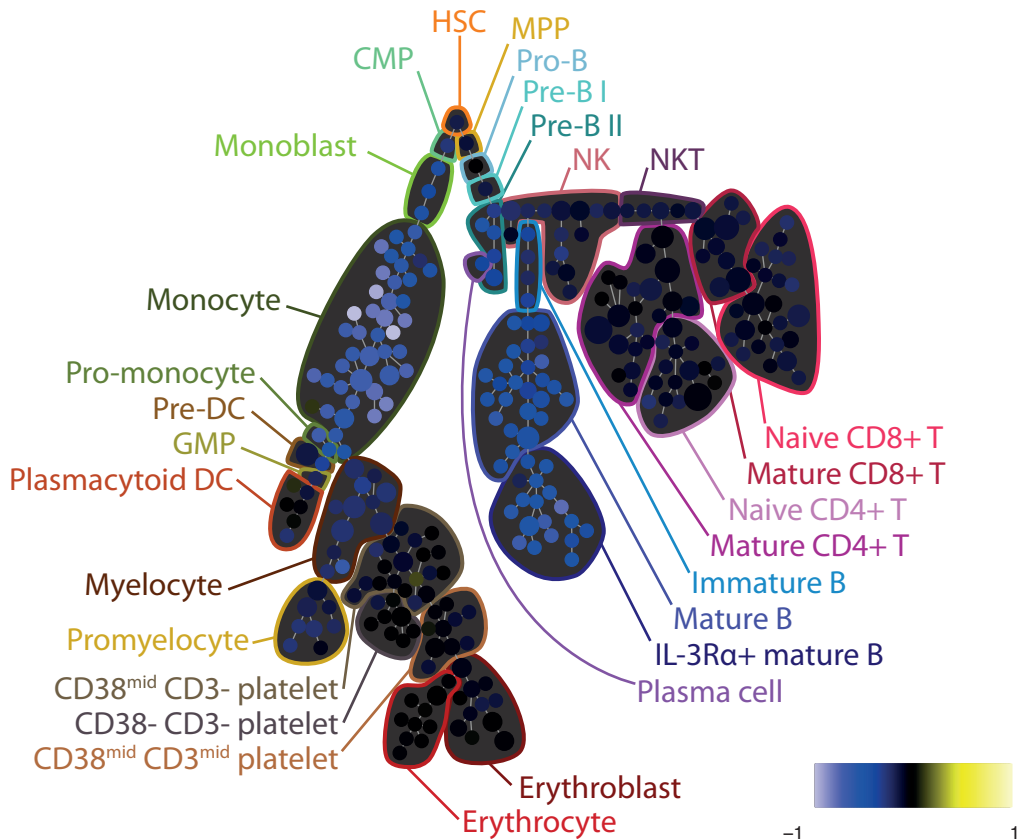

Figure S8B

154-pSHP2 ---- Dasatinib+PMAiono vs Ref Ratio

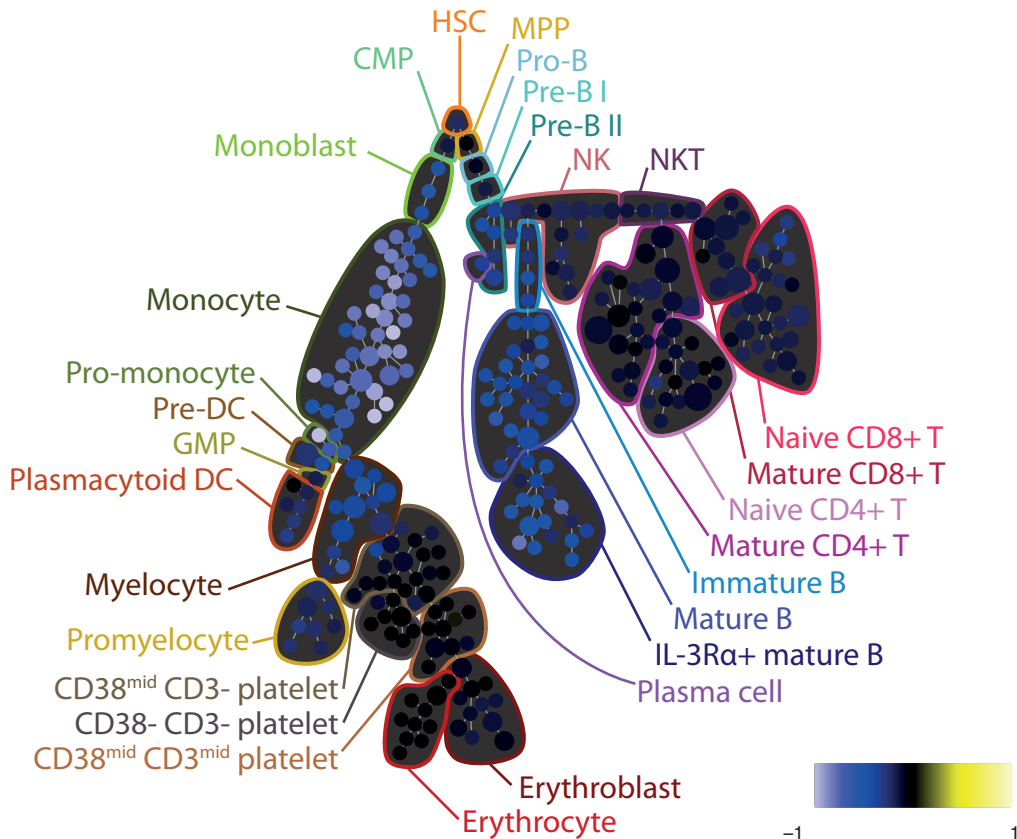

Figure S8B

154-pSHP2 ---- Dasatinib+PVO4 vs Ref Ratio

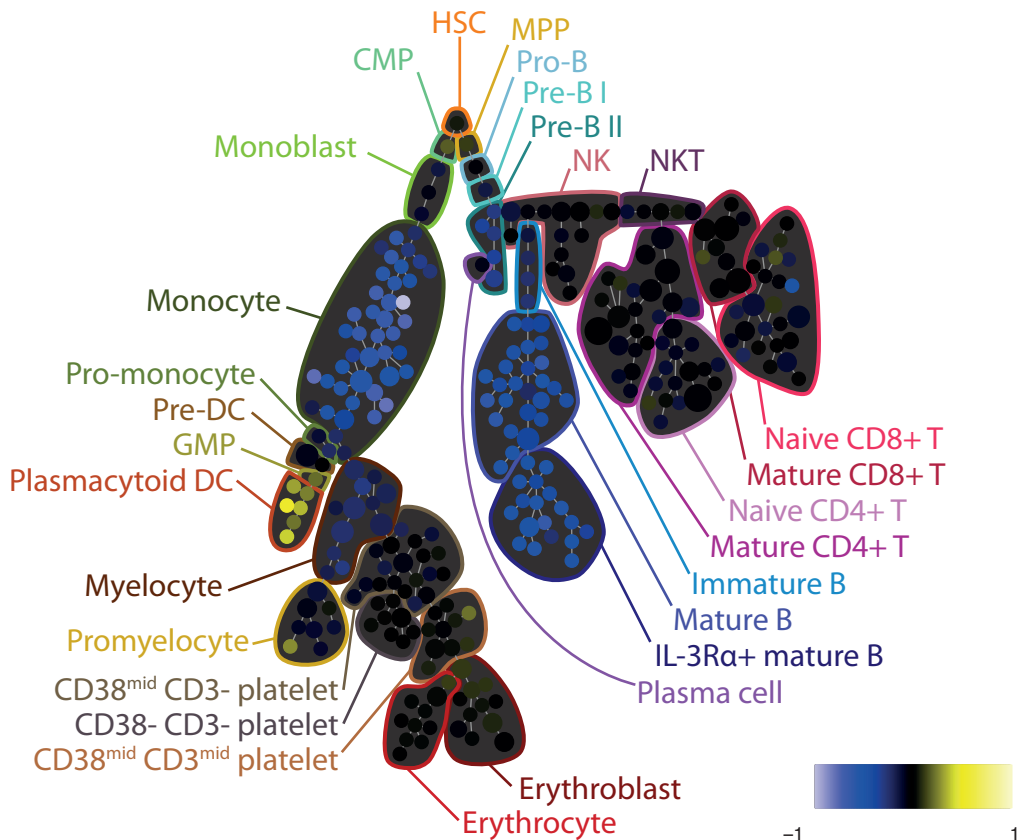

Figure S8B

154-pSHP2 ---- Dasatinib+Unstim vs Ref Ratio

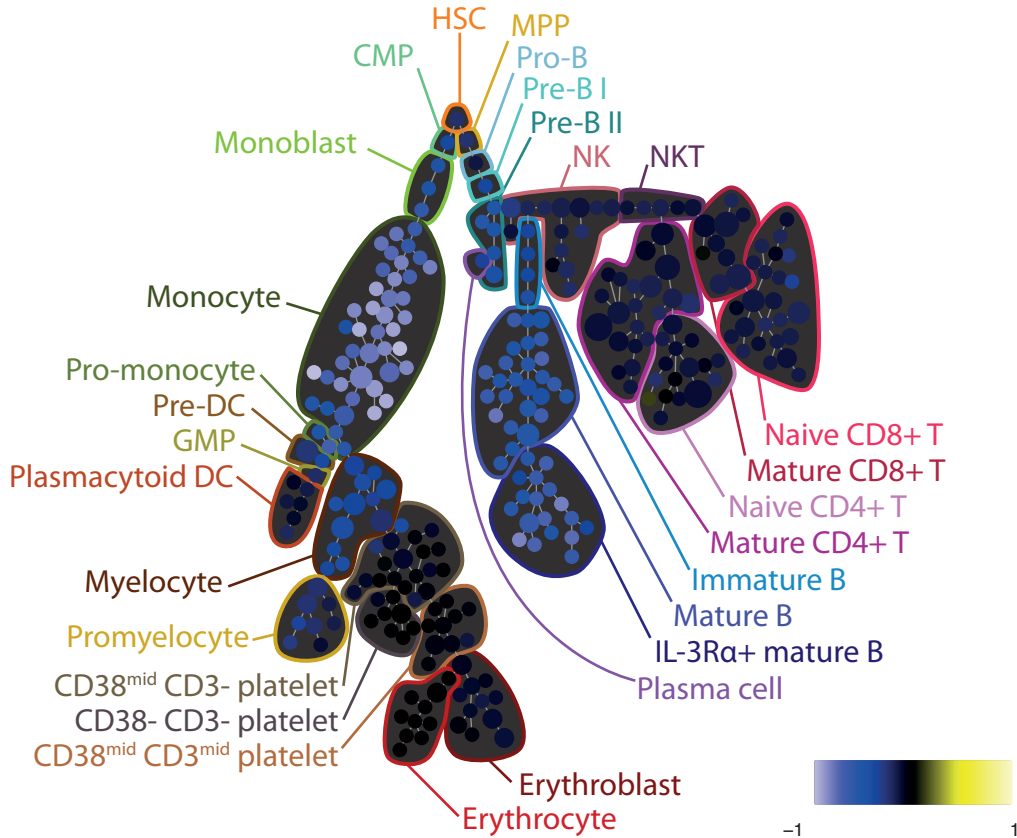



Figure S8B

156-pZAP70/Syk --- Dasatinib+BCR vs Ref Ratio

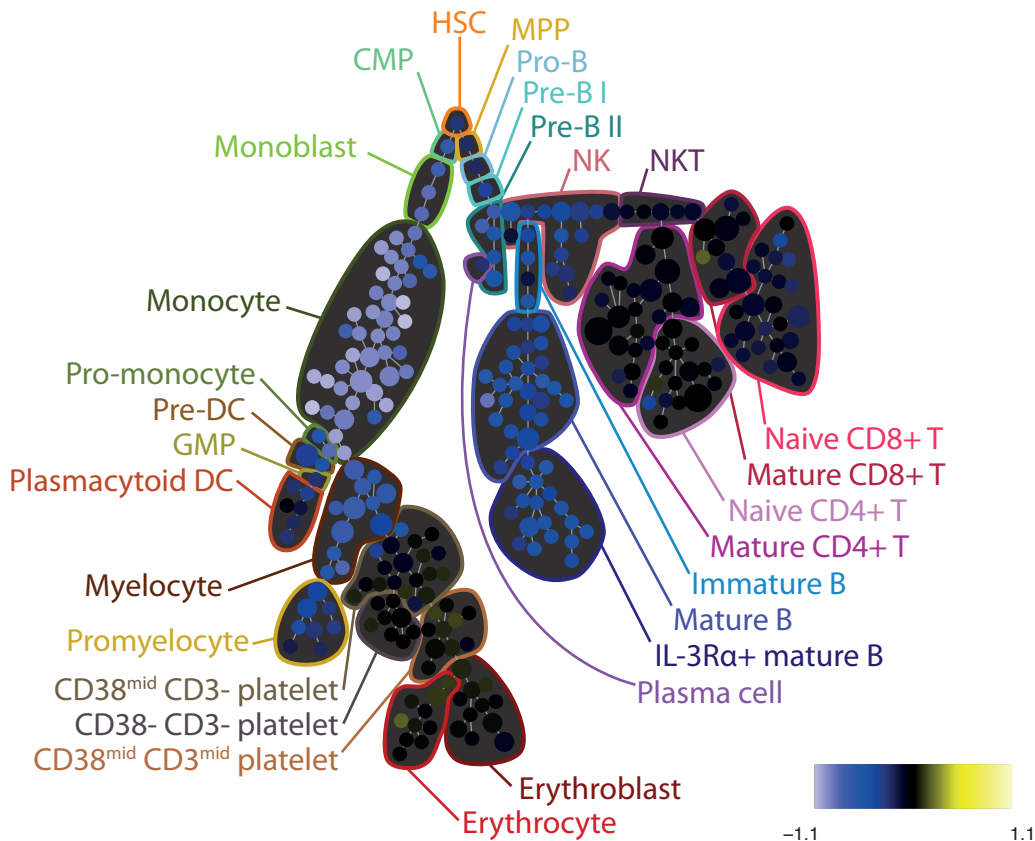

Figure S8B

156-pZAP70/Syk ---- Dasatinib+Flt3L vs Ref Ratio

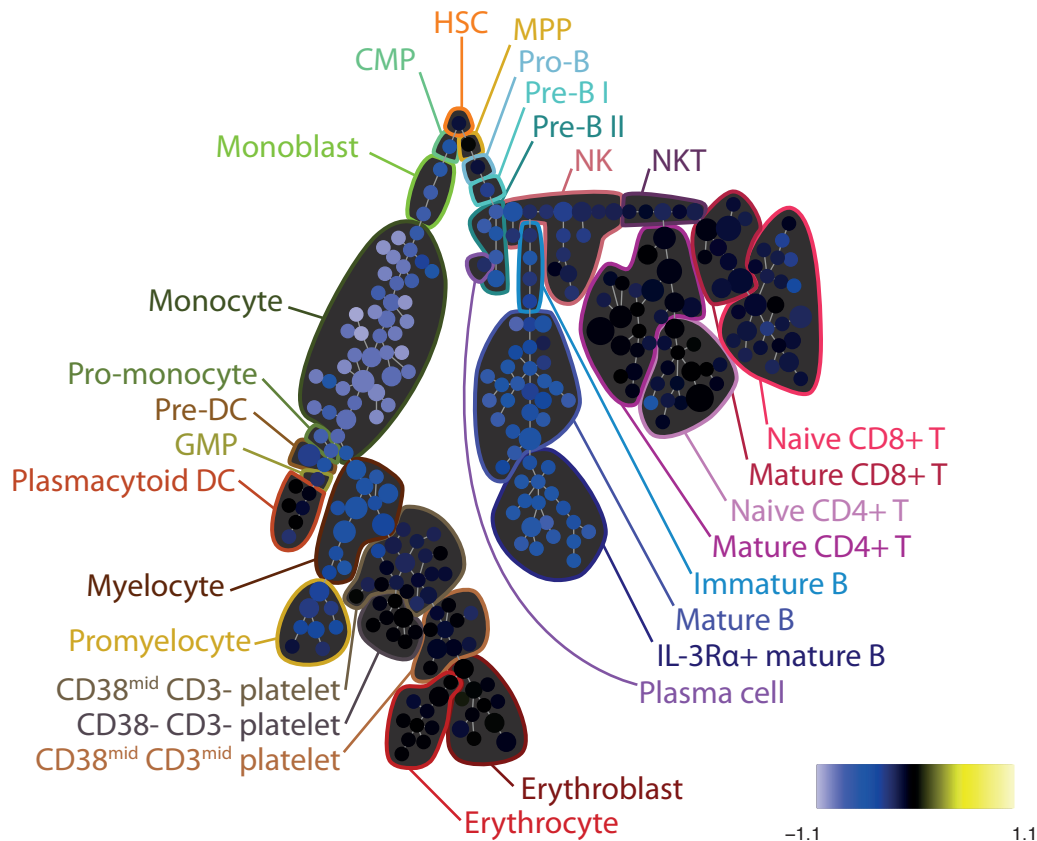

Figure S8B

156-pZAP70/Syk ---- Dasatinib+IL7 vs Ref Ratio

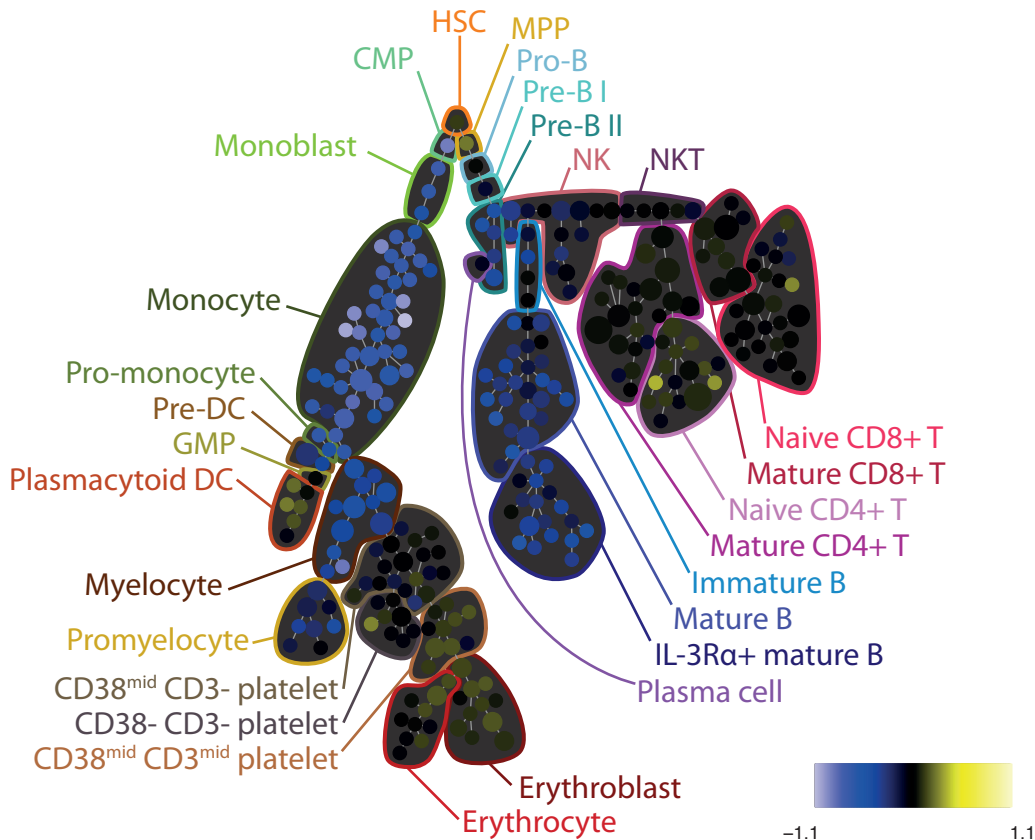

Figure S8B

156-pZAP70/Syk ---- Dasatinib+PMAiono vs Ref Ratio

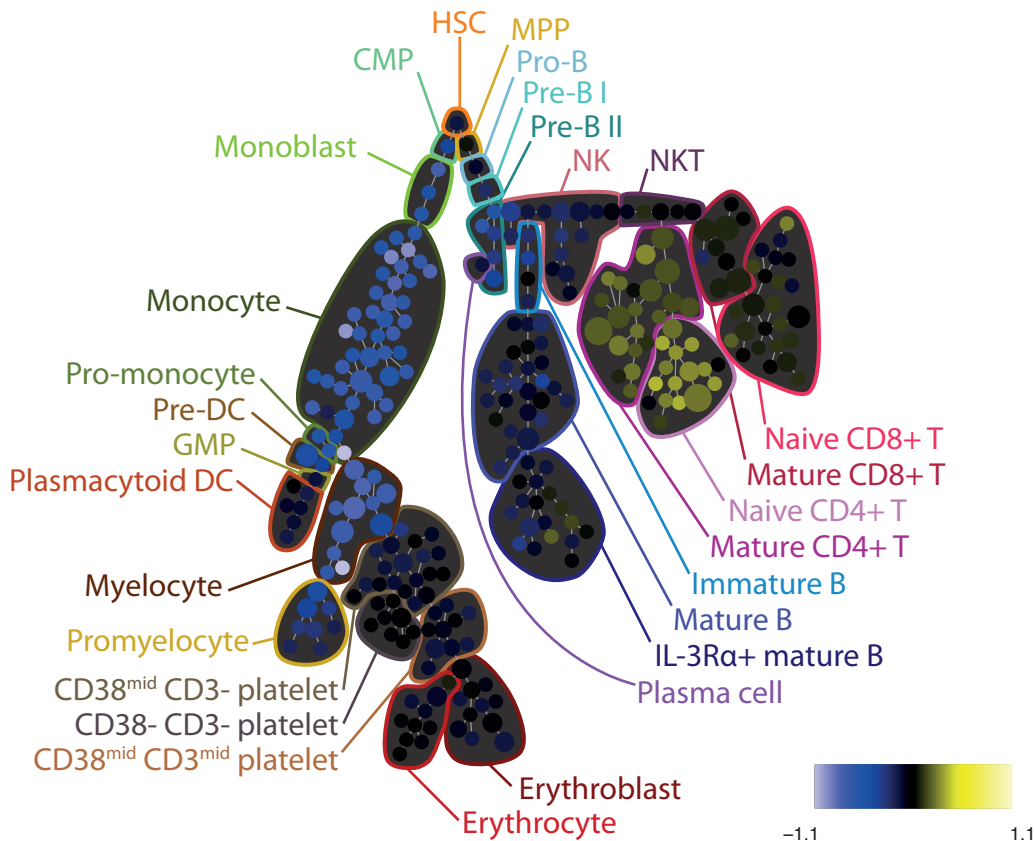

Figure S8B

156-pZAP70/Syk ---- Dasatinib+PVO4 vs Ref Ratio

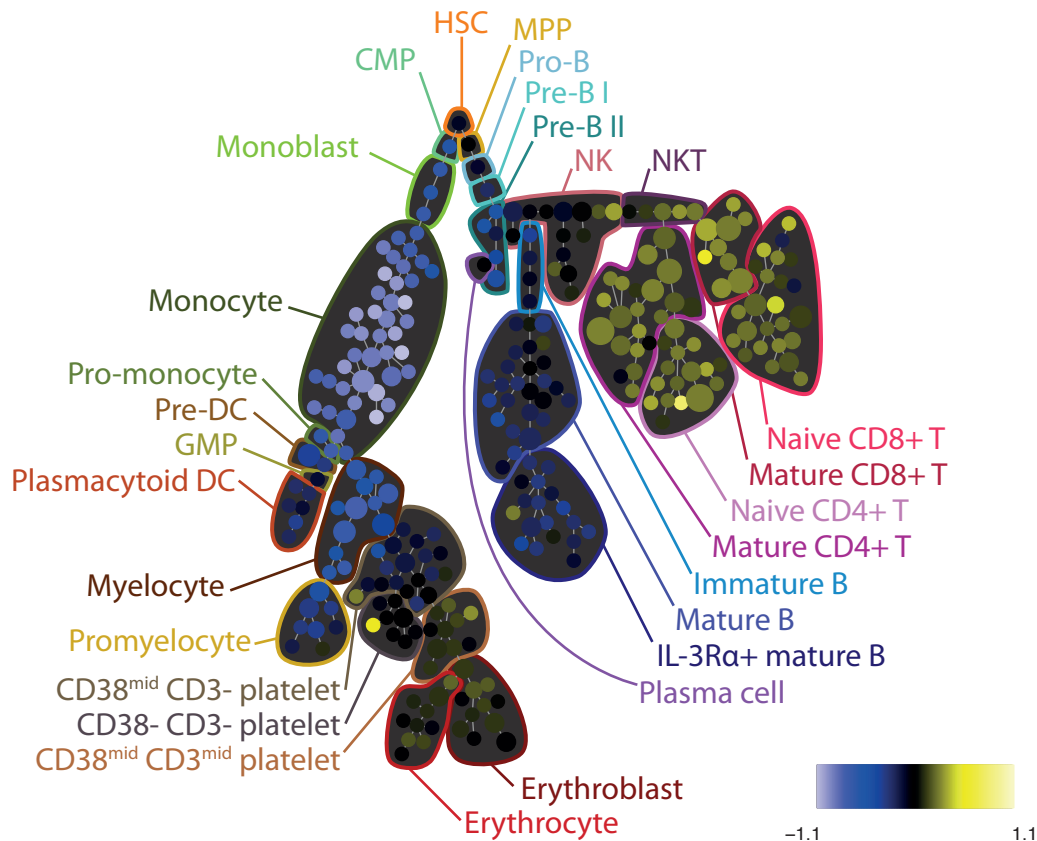

Figure S8B

156-pZAP70/Syk ---- Dasatinib+Unstim vs Ref Ratio

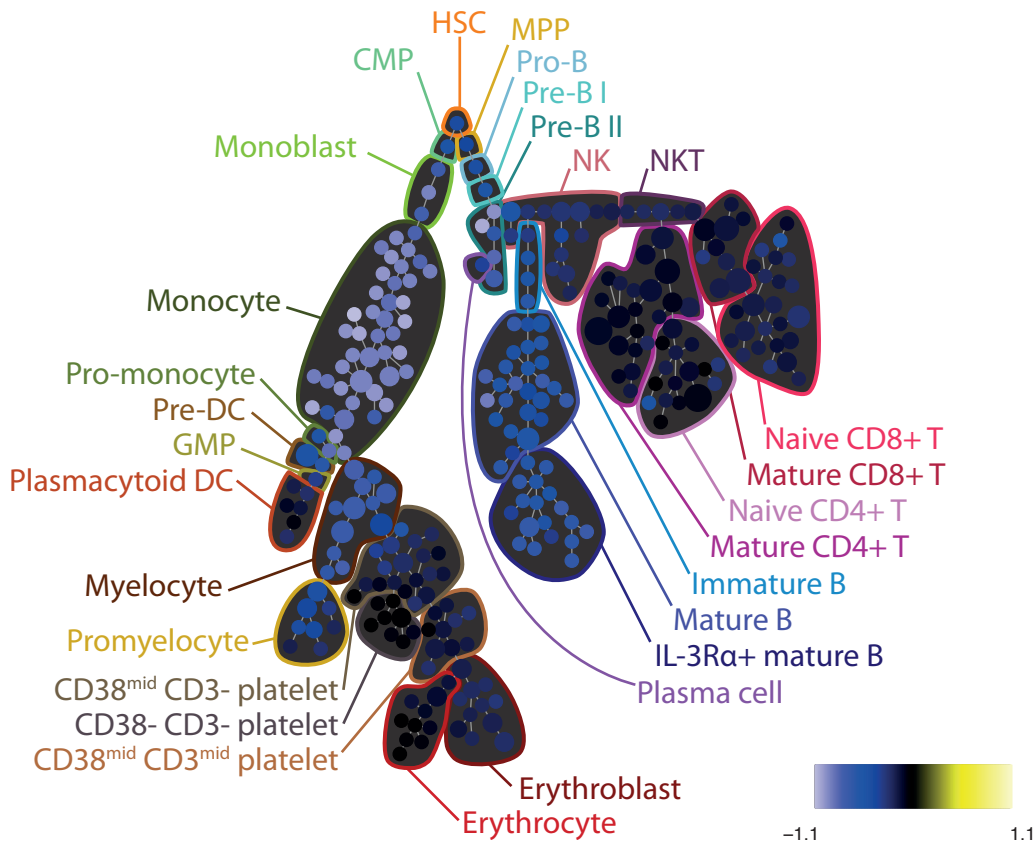

Figure S8B

159-pSTAT3 ---- Dasatinib+BCR vs Ref Ratio

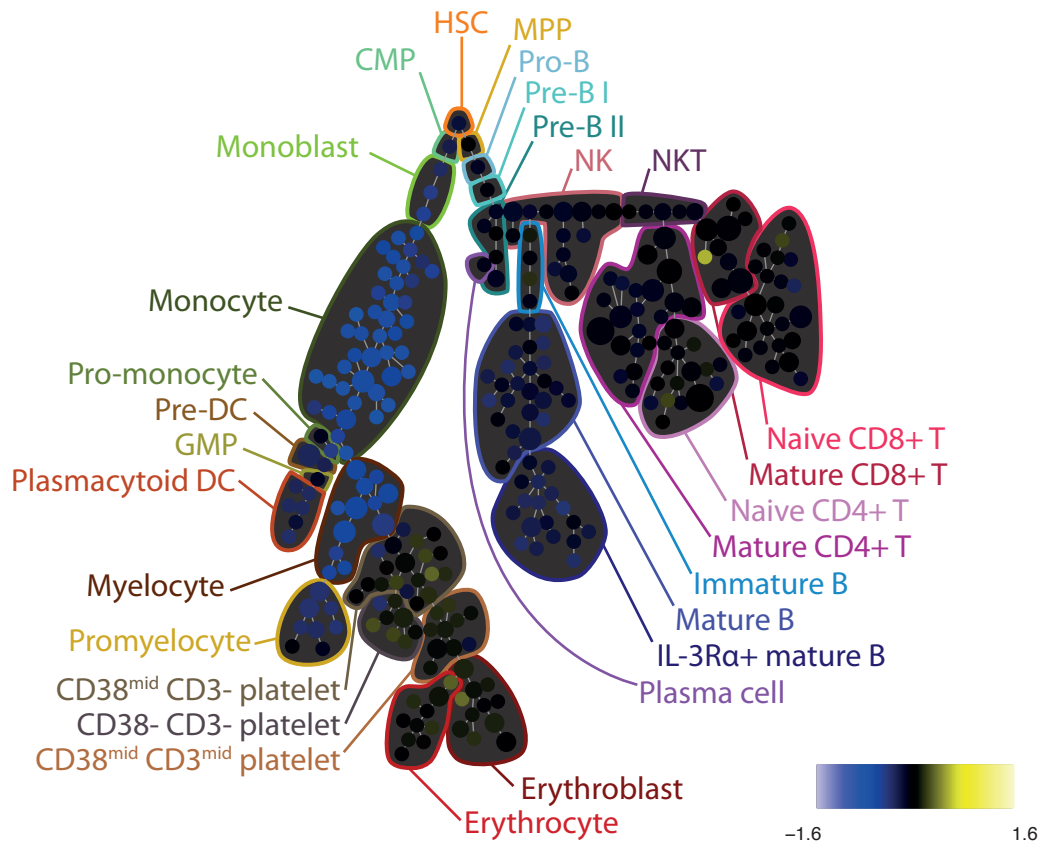

Figure S8B

159-pSTAT3 ---- Dasatinib+Flt3L vs Ref Ratio

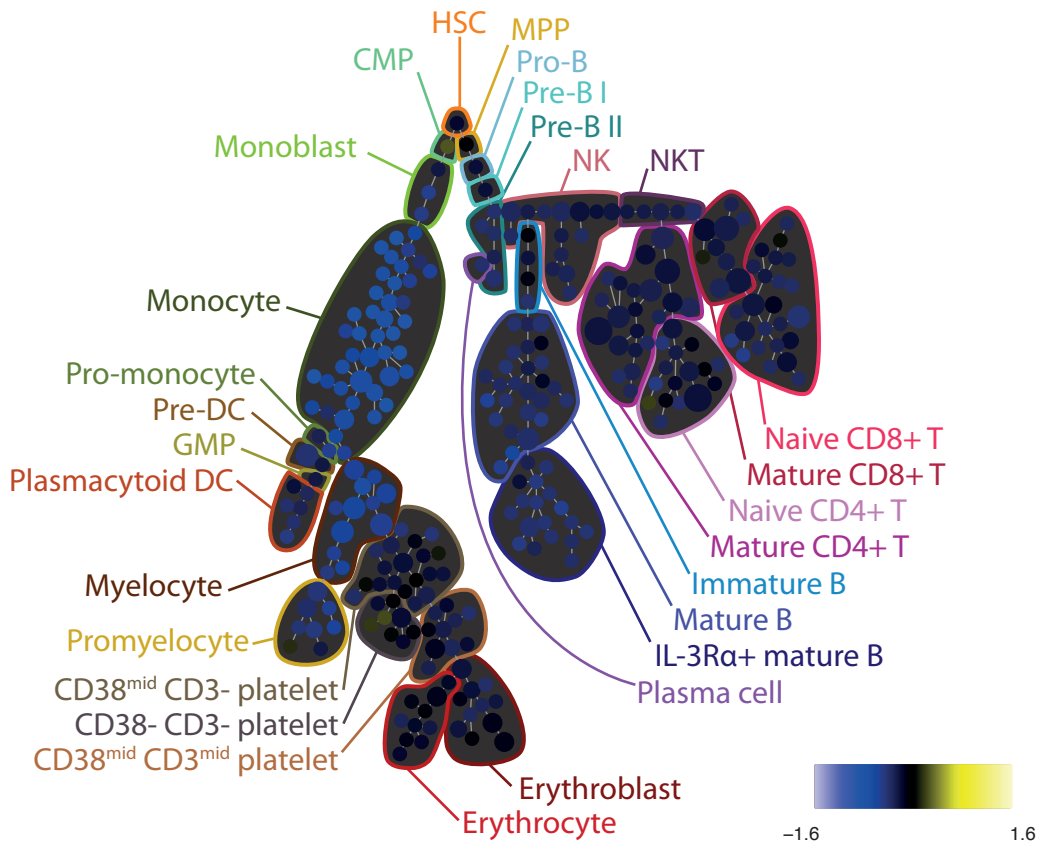



Figure S8B

159-pSTAT3 ---- Dasatinib+IL7 vs Ref Ratio

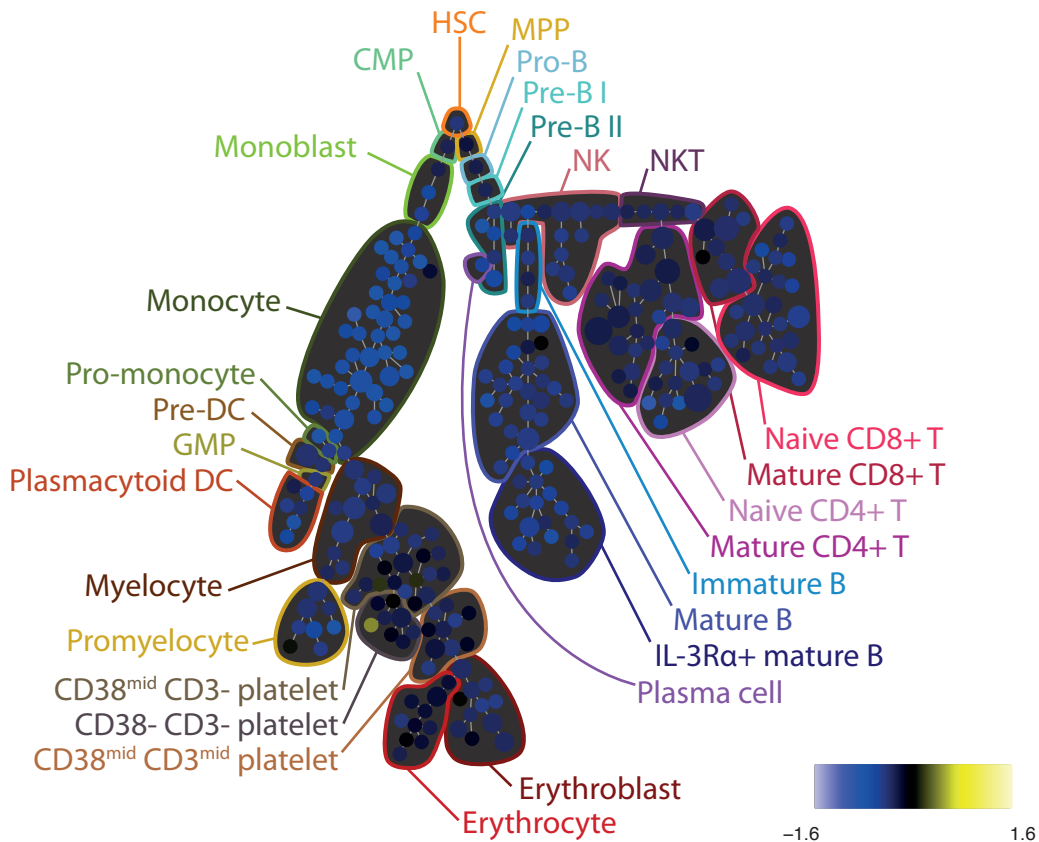

Figure S8B

159-pSTAT3 --- Dasatinib+PMAiono vs Ref Ratio

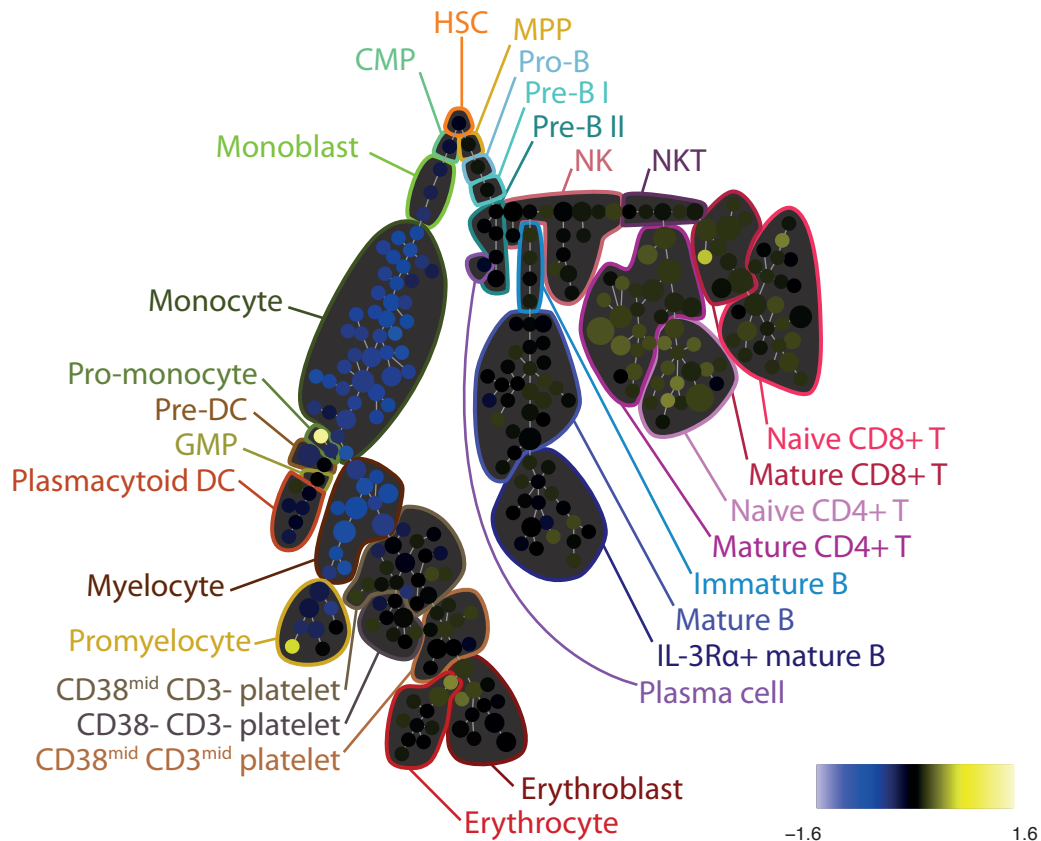

Figure S8B

159-pSTAT3 ---- Dasatinib+PVO4 vs Ref Ratio

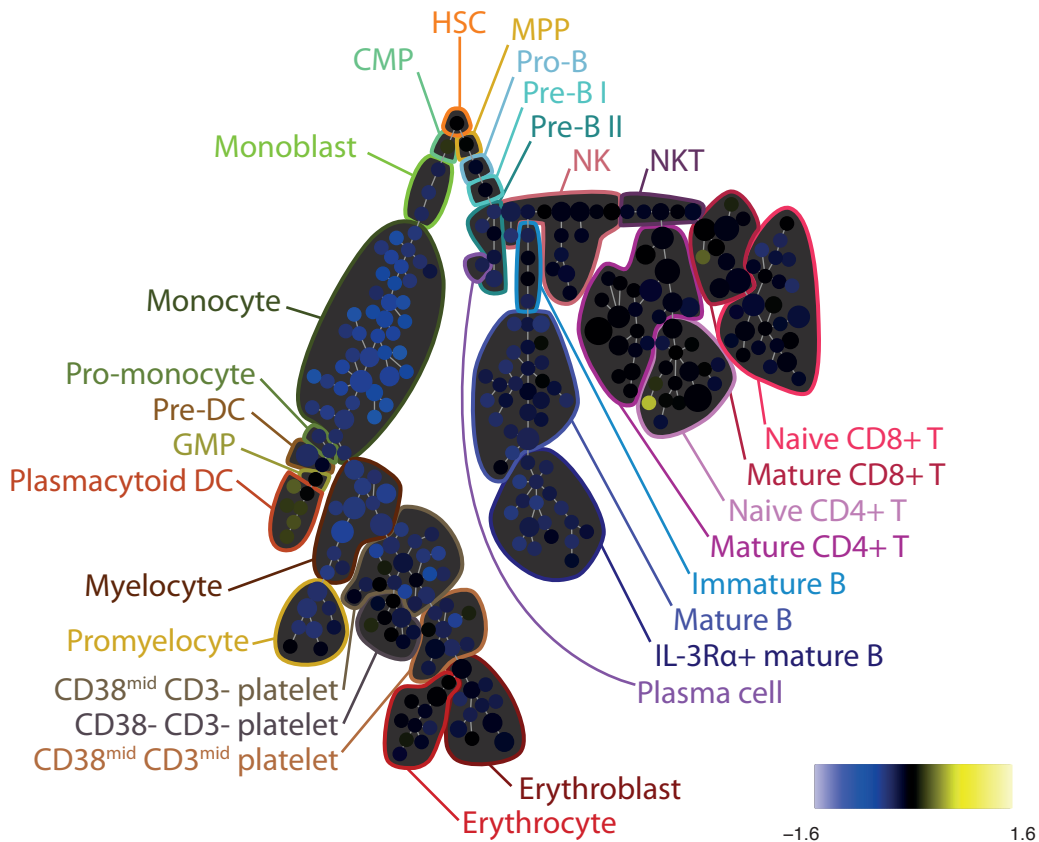

Figure S8B

159-pSTAT3 ---- Dasatinib+Unstim vs Ref Ratio

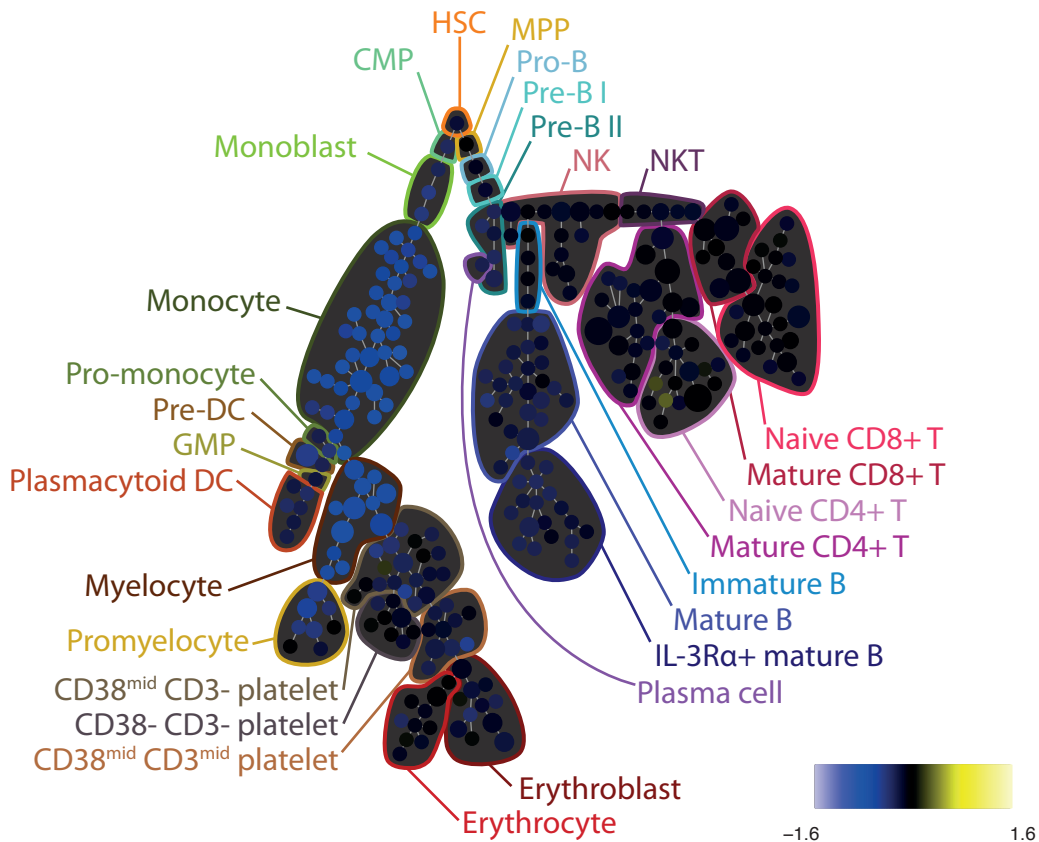

Figure S8B

164-pSLP-76 ---- Dasatinib+BCR vs Ref Ratio

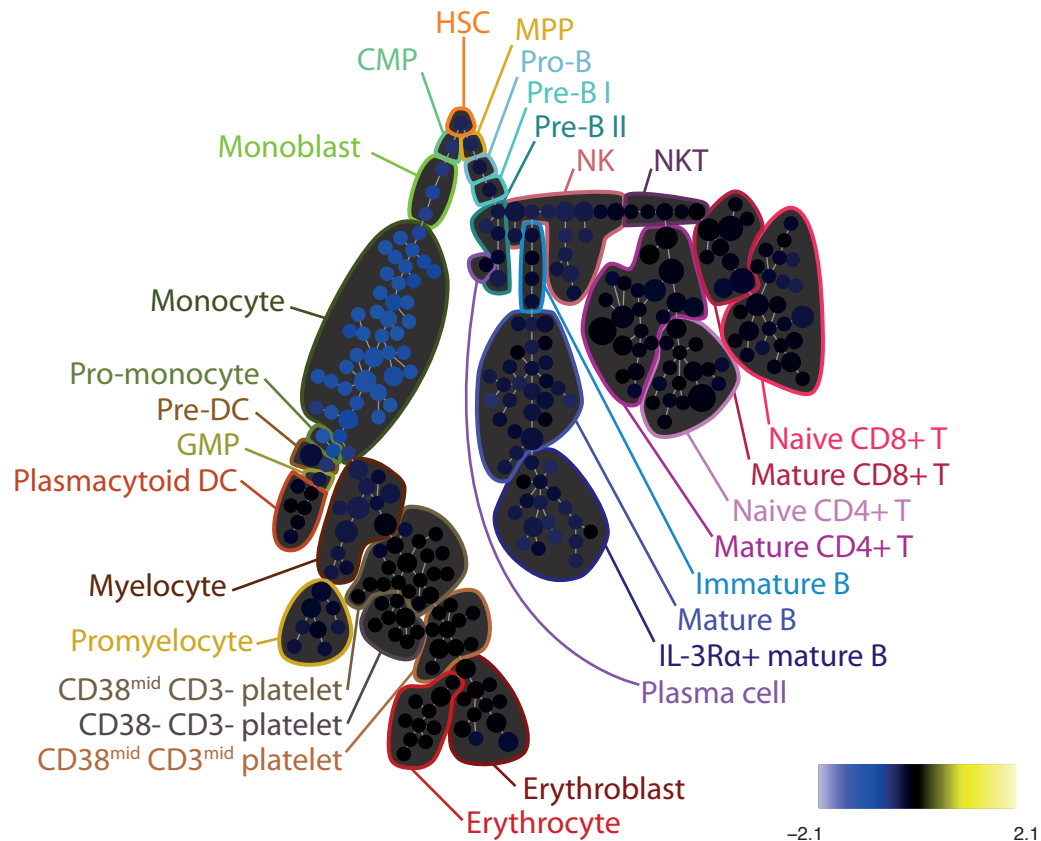

Figure S8B

164-pSLP-76 ---- Dasatinib+Flt3L vs Ref Ratio

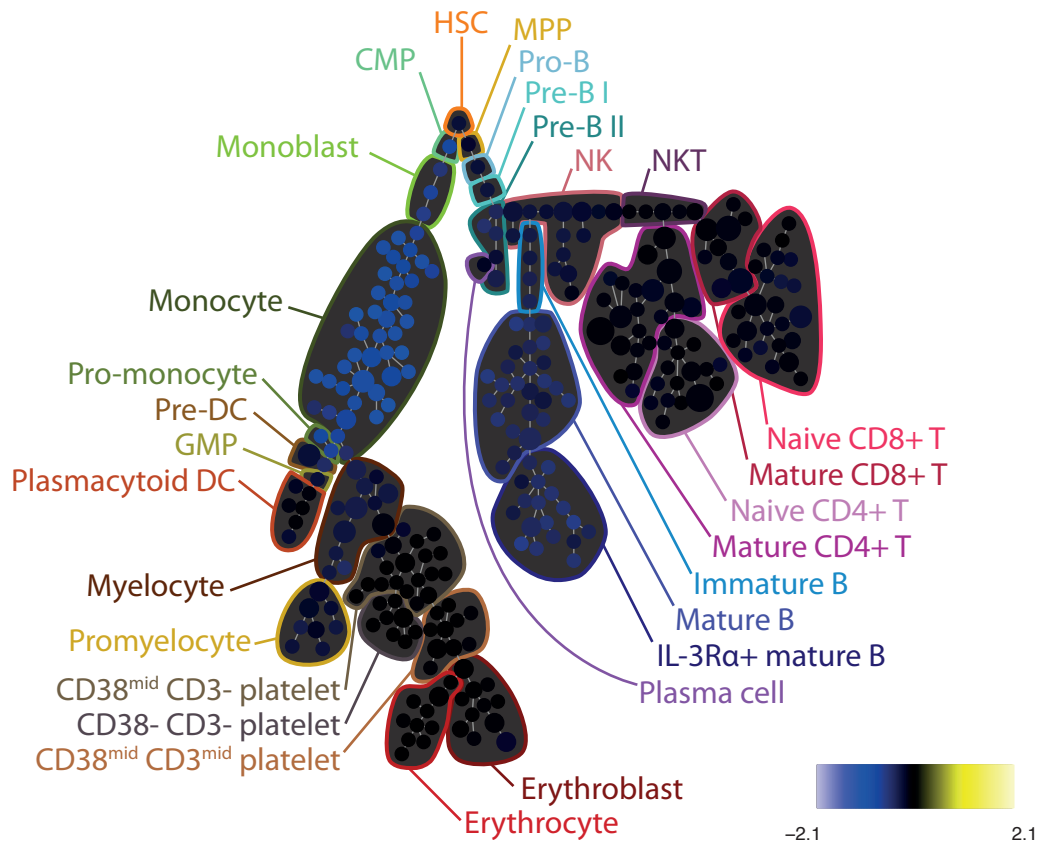

Figure S8B

164-pSLP-76 ---- Dasatinib+IL7 vs Ref Ratio

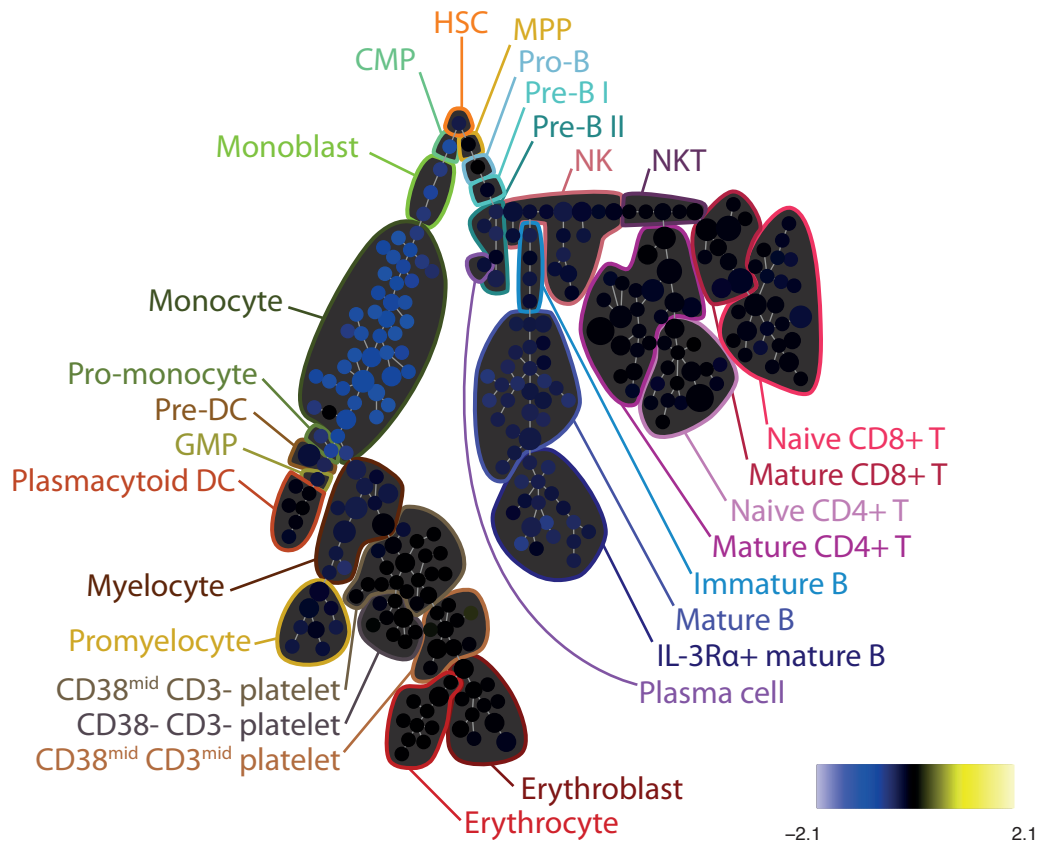

Figure S8B

164-pSLP-76 --- Dasatinib+PMAiono vs Ref Ratio

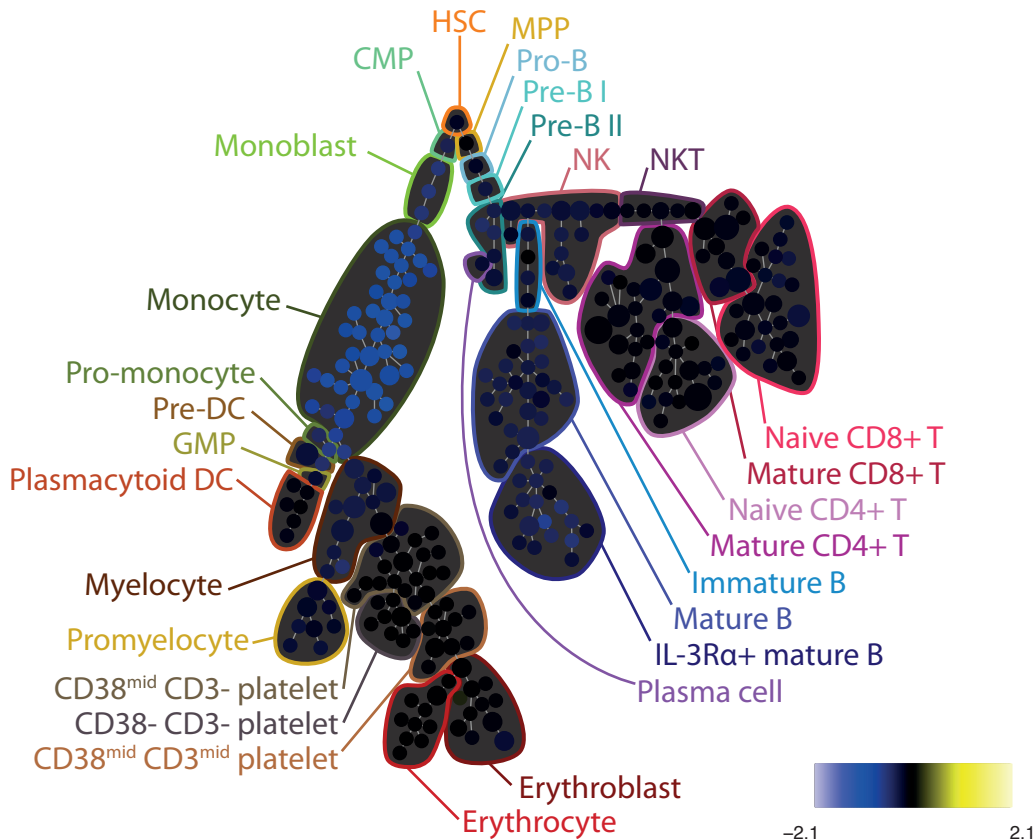



Figure S8B

164-pSLP-76 ---- Dasatinib+PVO4 vs Ref Ratio

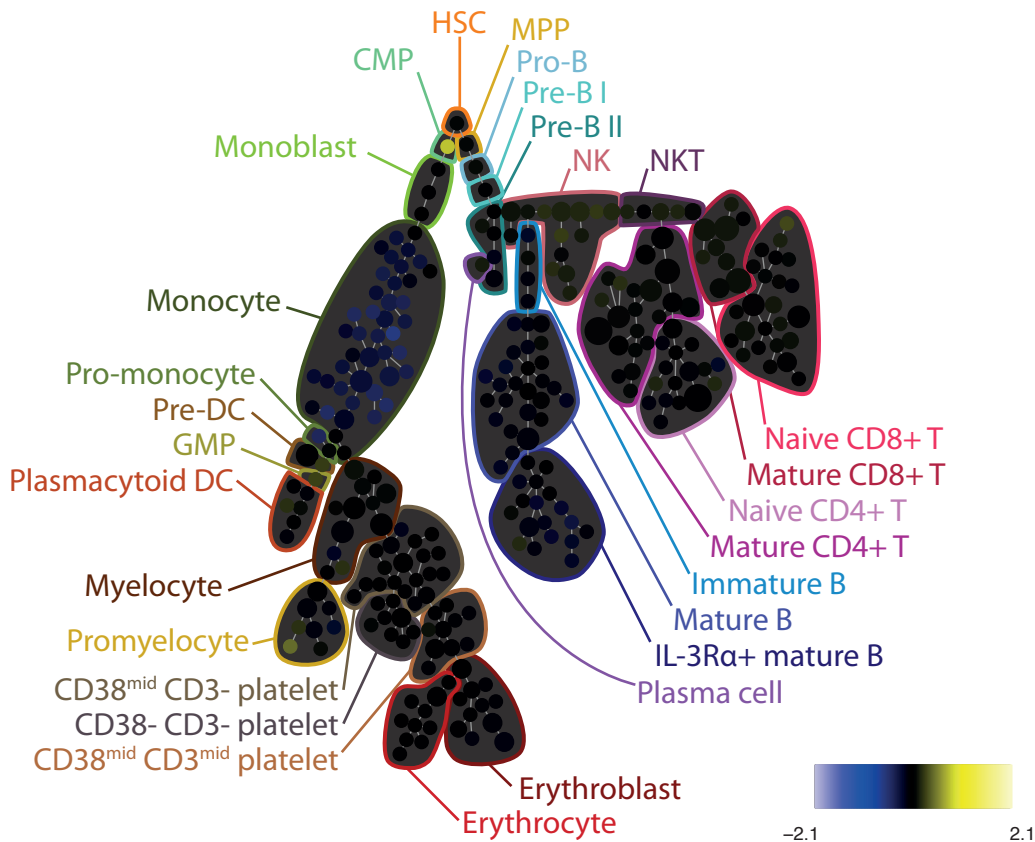

Figure S8B

164-pSLP-76 --- Dasatinib+Unstim vs Ref Ratio

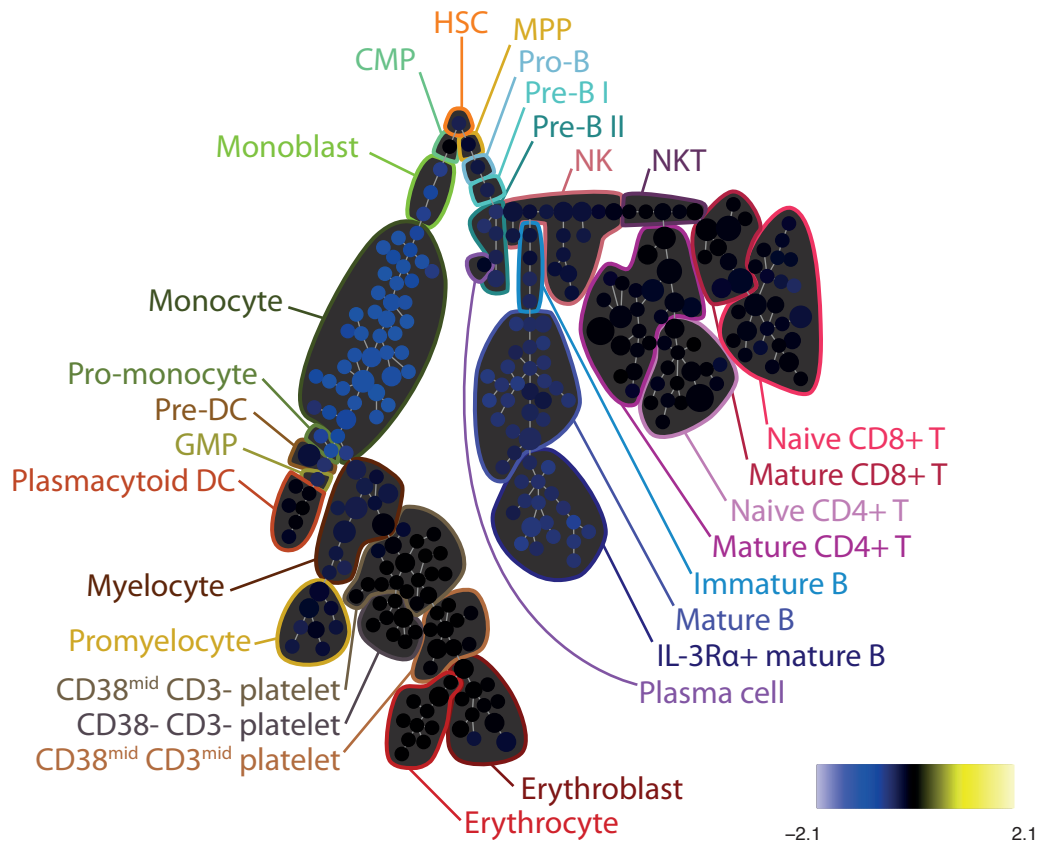

Figure S8B

165-pNFkB ---- Dasatinib+BCR vs Ref Ratio

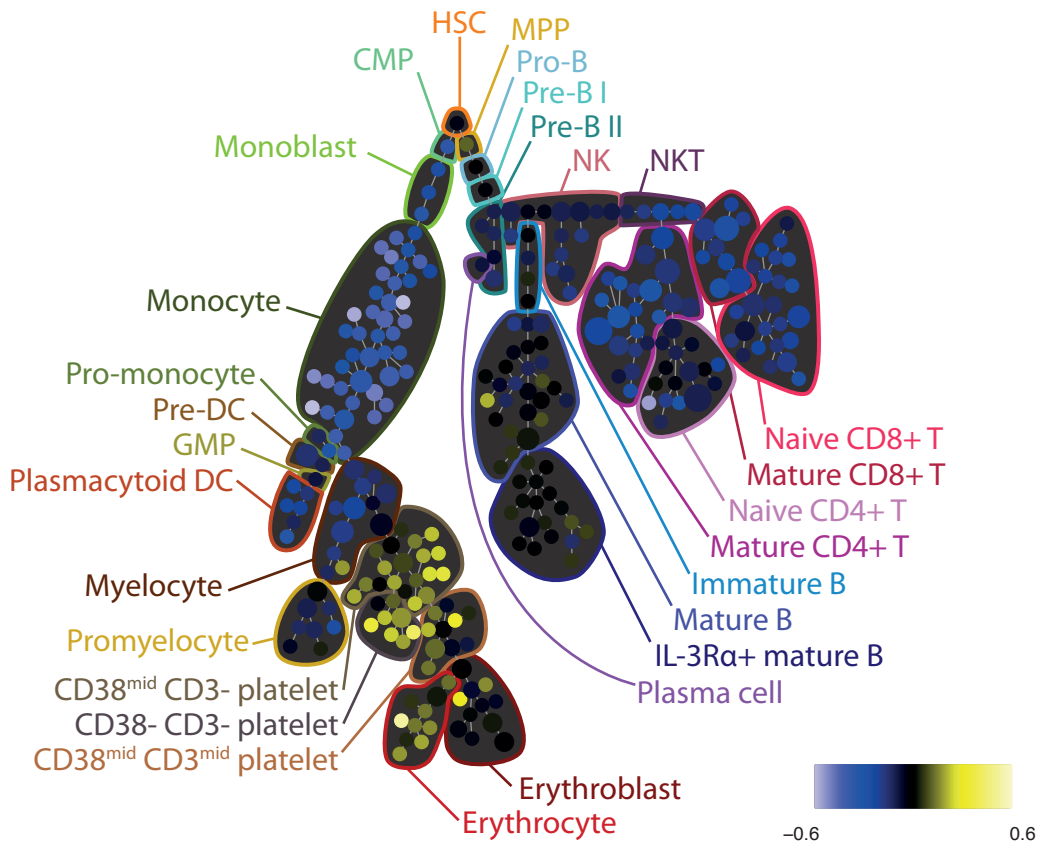

Figure S8B

165-pNFkB ---- Dasatinib+Flt3L vs Ref Ratio

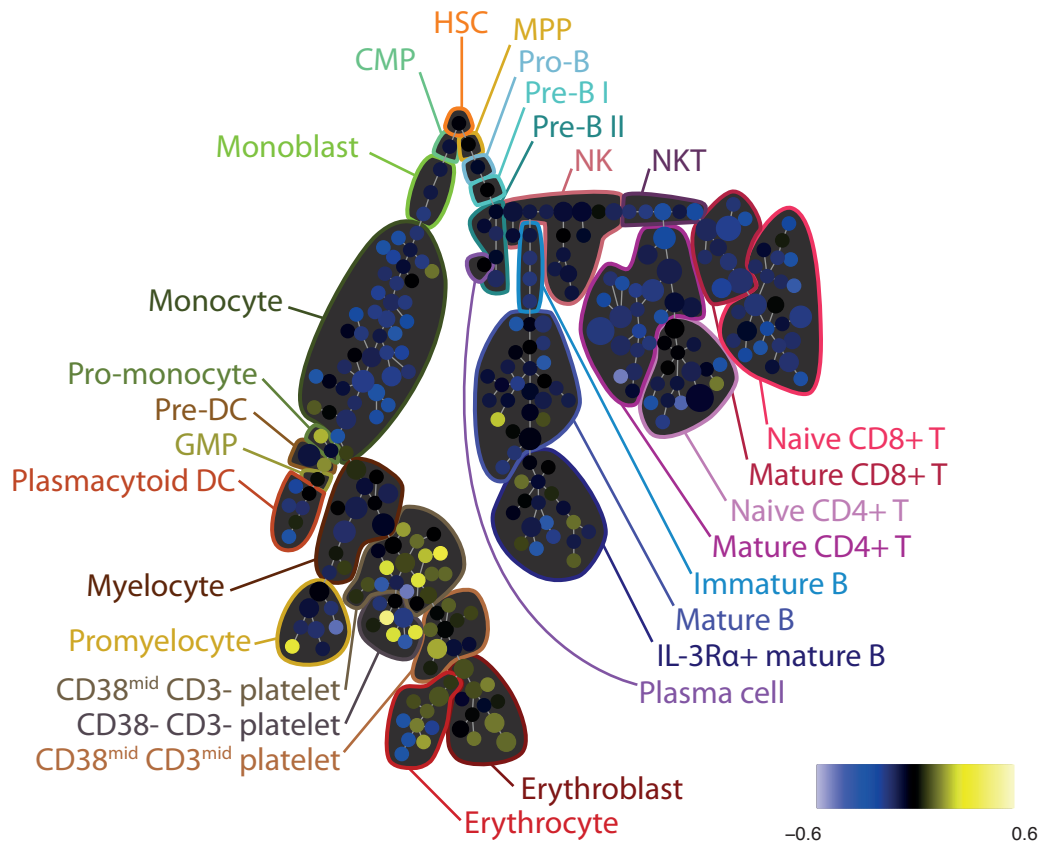

Figure S8B

165-pNFkB ---- Dasatinib+IL7 vs Ref Ratio

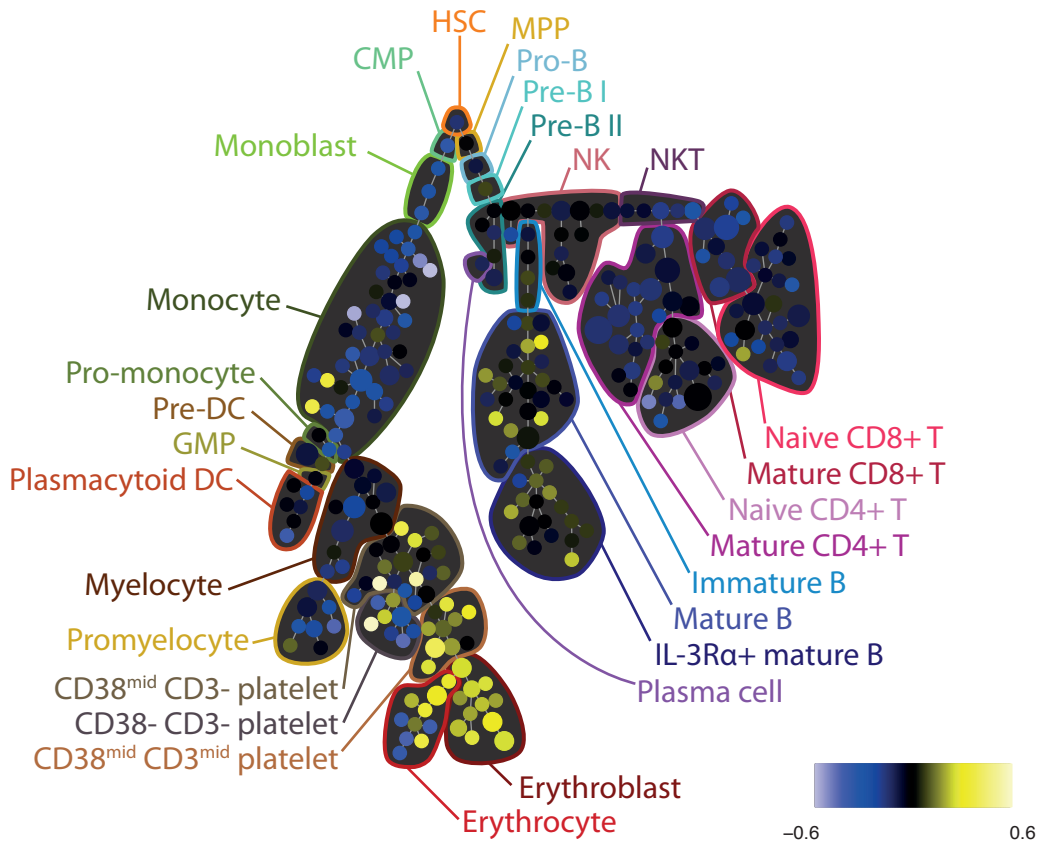

Figure S8B

165-pNFkB ---- Dasatinib+PMAiono vs Ref Ratio

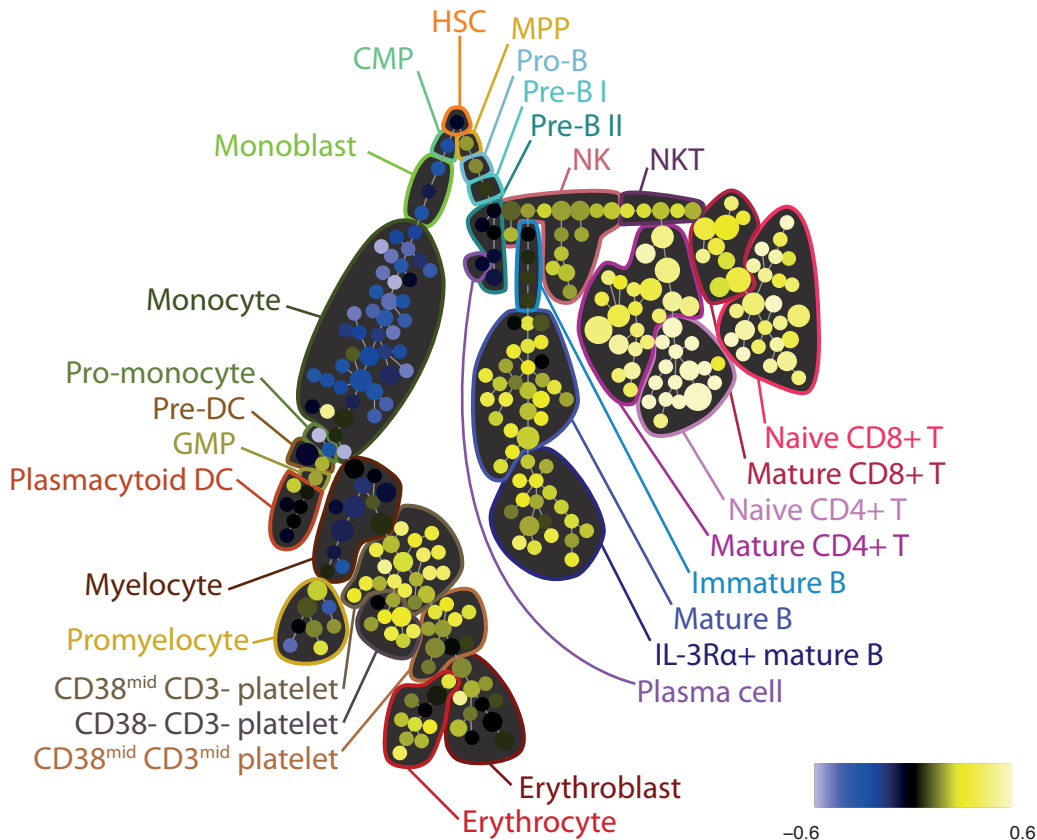

Figure S8B

165-pNFkB ---- Dasatinib+PVO4 vs Ref Ratio

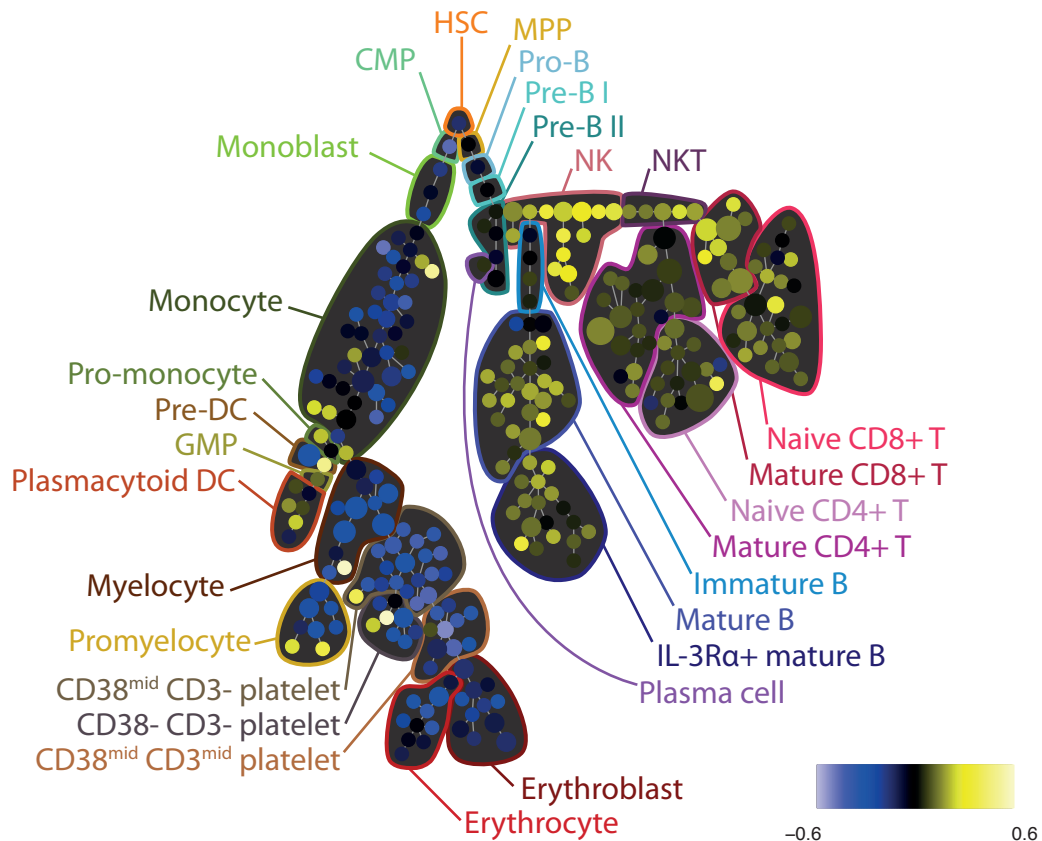

Figure S8B

165-pNFkB ---- Dasatinib+Unstim vs Ref Ratio

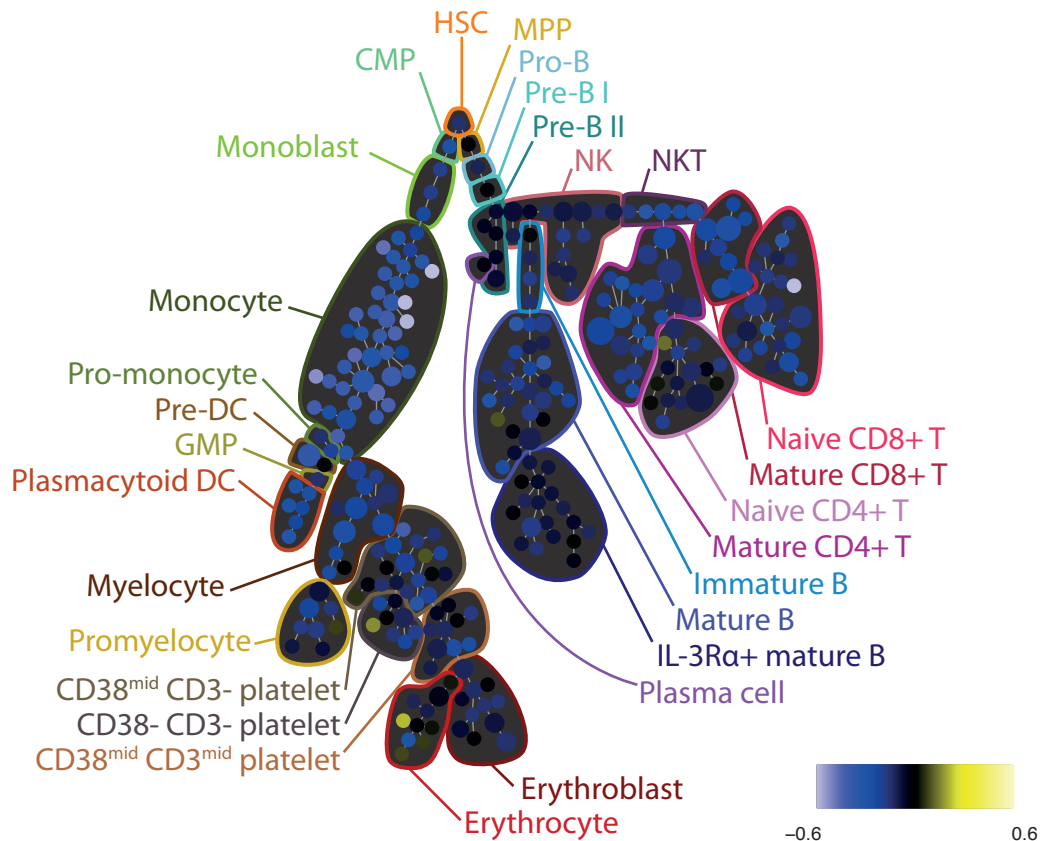



Figure S8B

166-IkBalpha ---- Dasatinib+BCR vs Ref Ratio

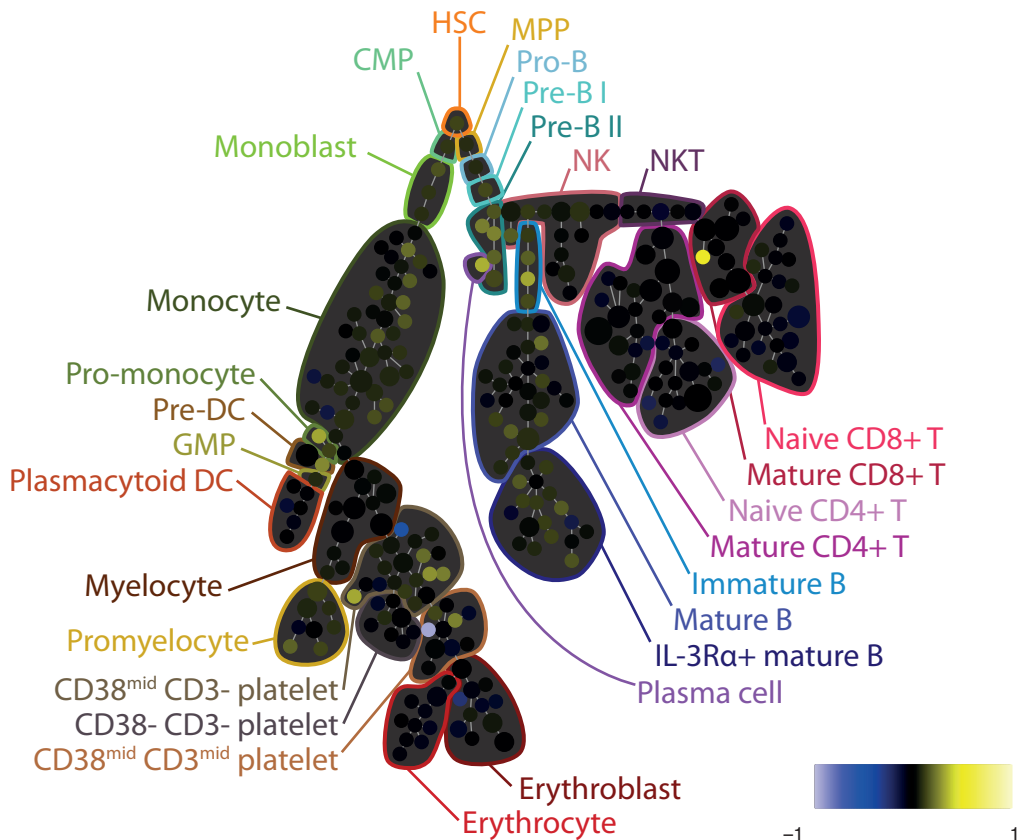

Figure S8B

166-IkBaIpha ---- Dasatinib+Flt3L vs Ref Ratio

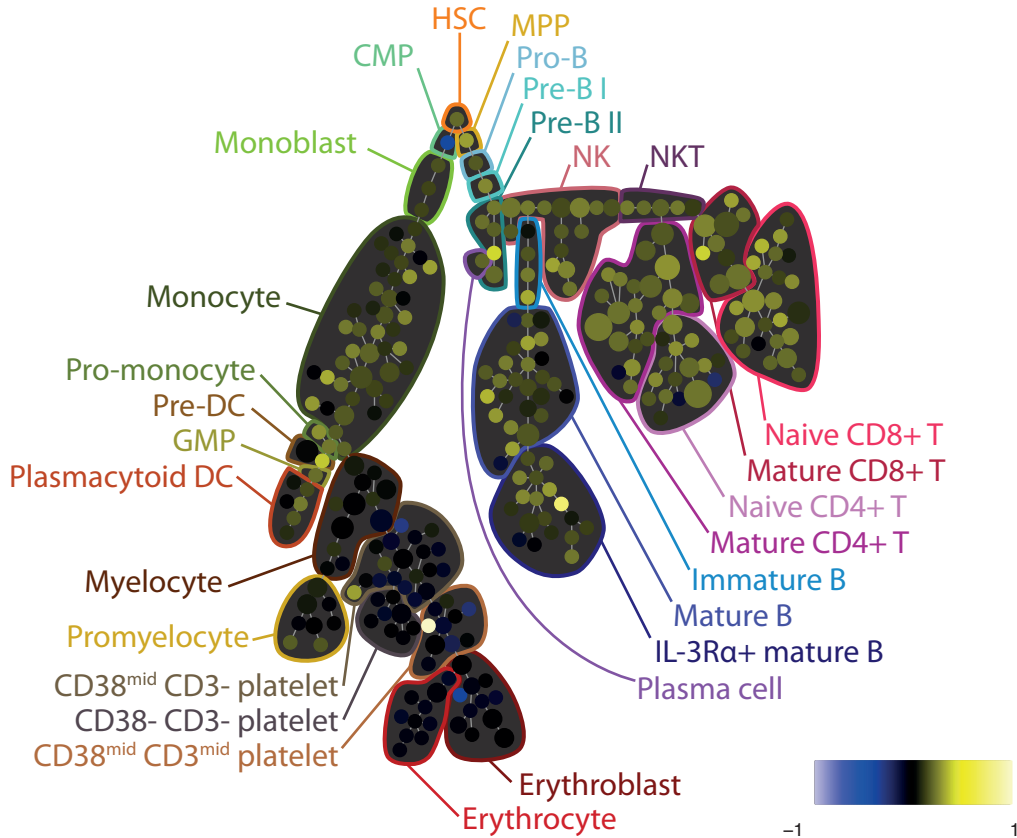

Figure S8B

166-IkBAlpha ---- Dasatinib+IL7 vs Ref Ratio

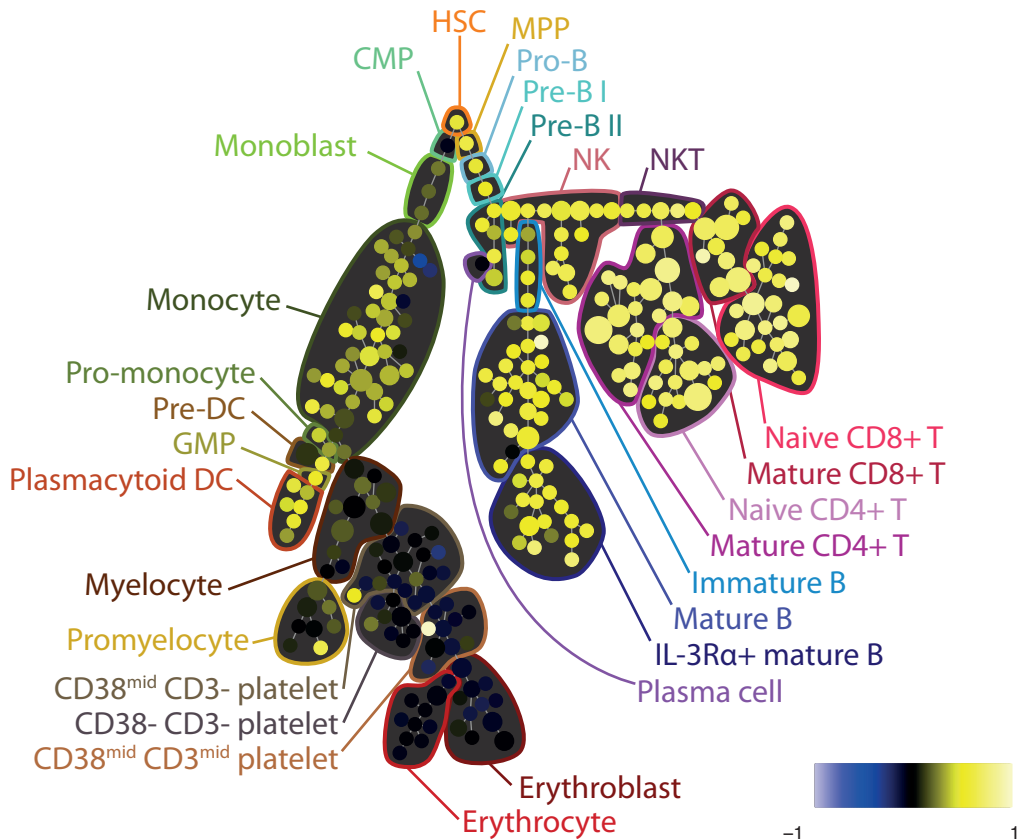

Figure S8B

166-IkBalpha --- Dasatinib+PMAiono vs Ref Ratio

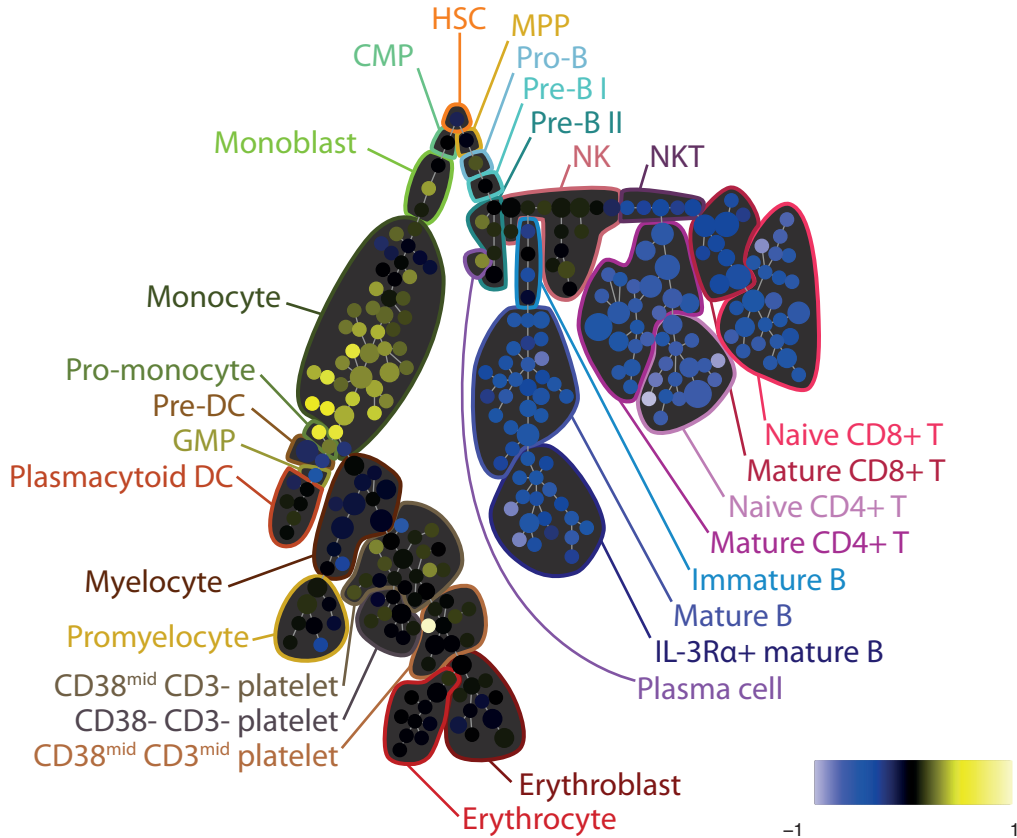

Figure S8B

166-IkBalpa ---- Dasatinib+PVO4 vs Ref Ratio

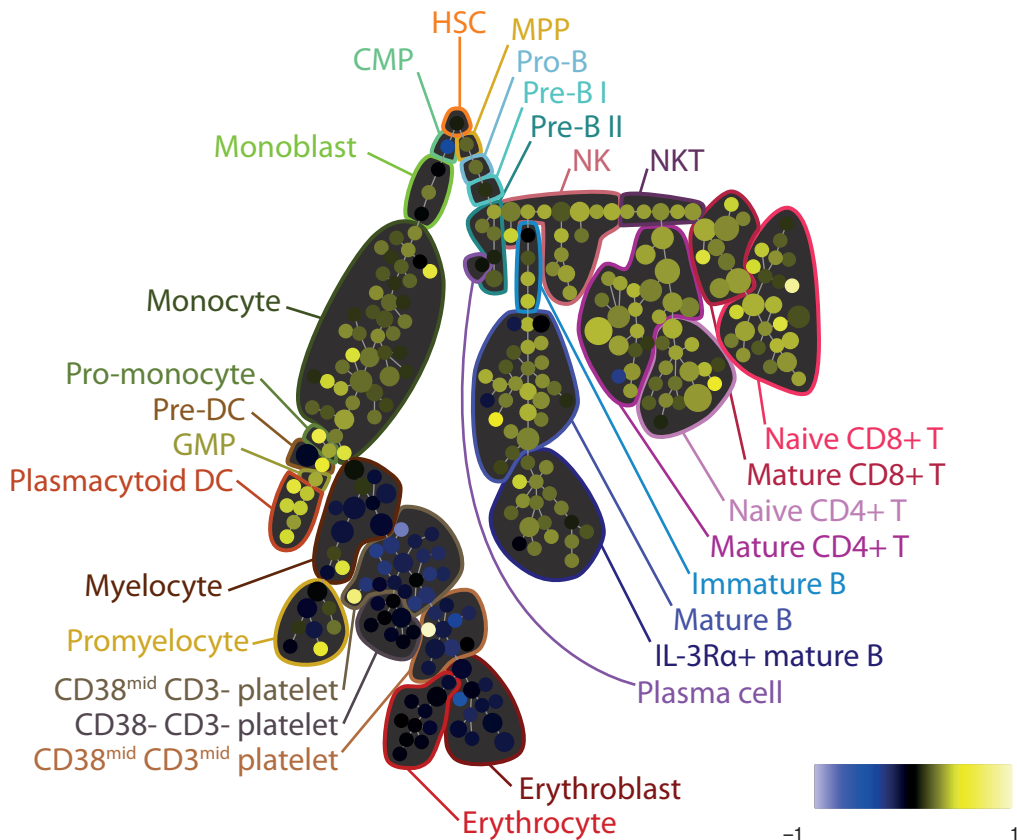

Figure S8B

166-IkBalpha ---- Dasatinib+Unstim vs Ref Ratio

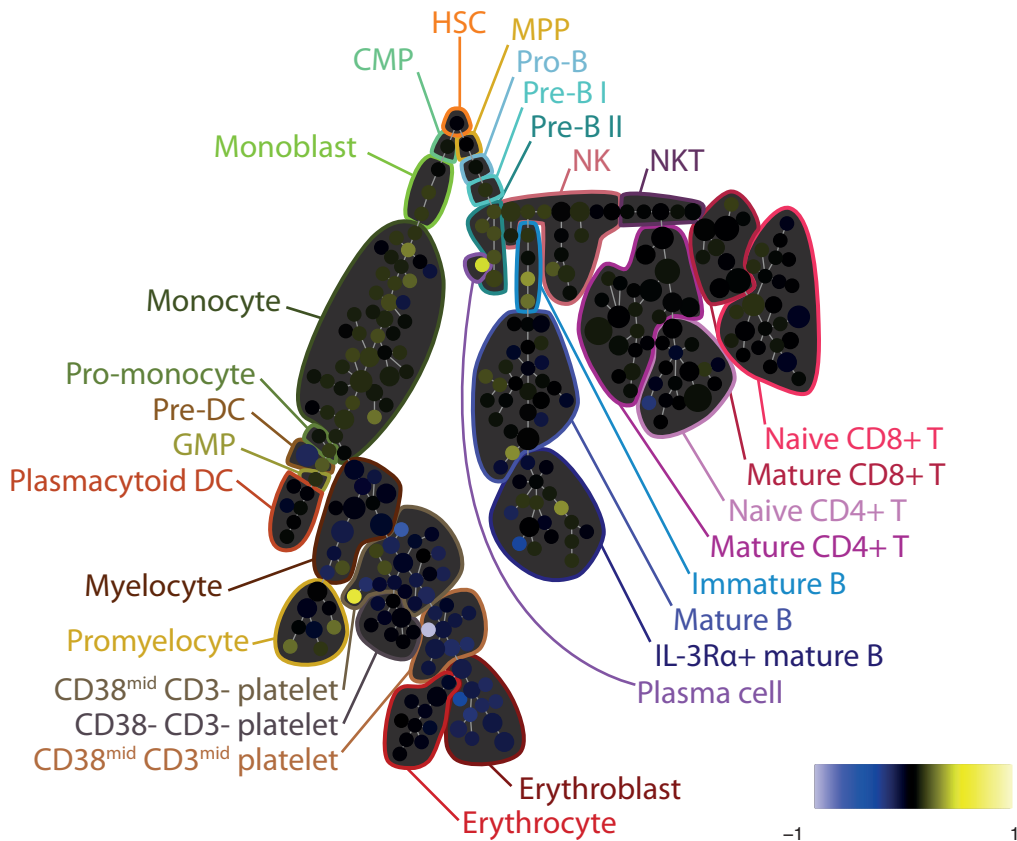

Figure S8B

168-pH3 ---- Dasatinib+BCR vs Ref Ratio

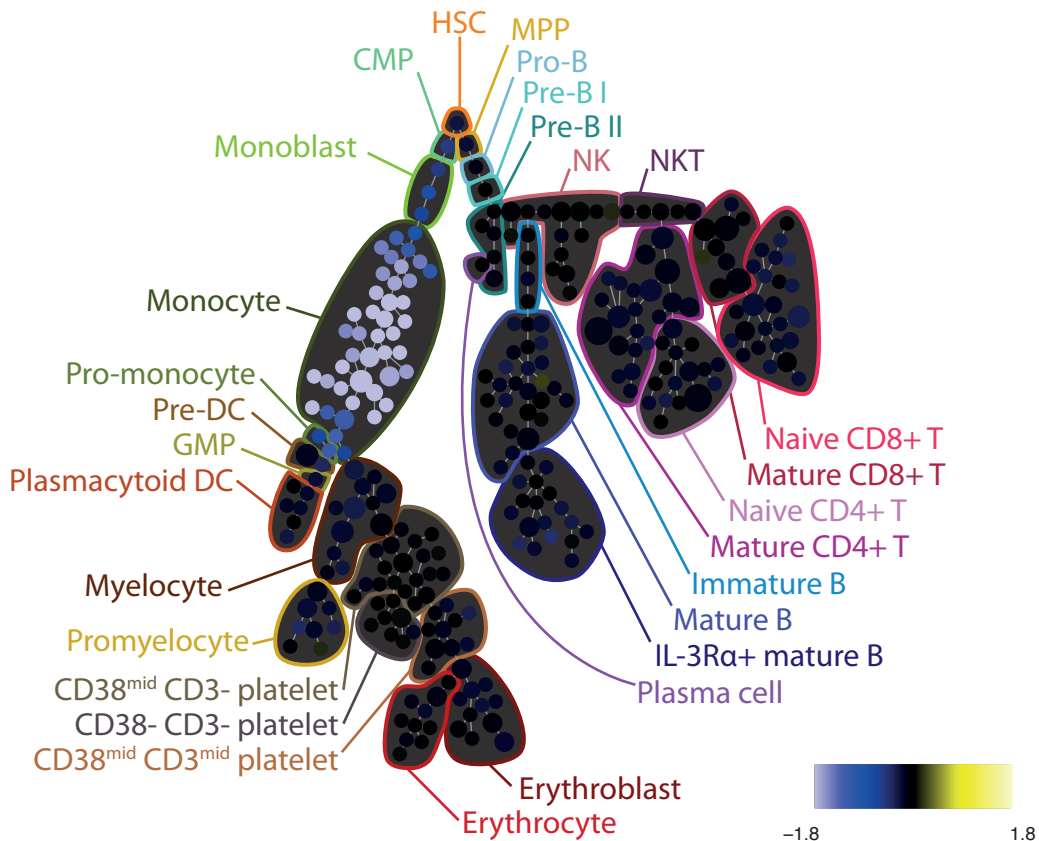

Figure S8B

168-pH3 ---- Dasatinib+Flt3L vs Ref Ratio

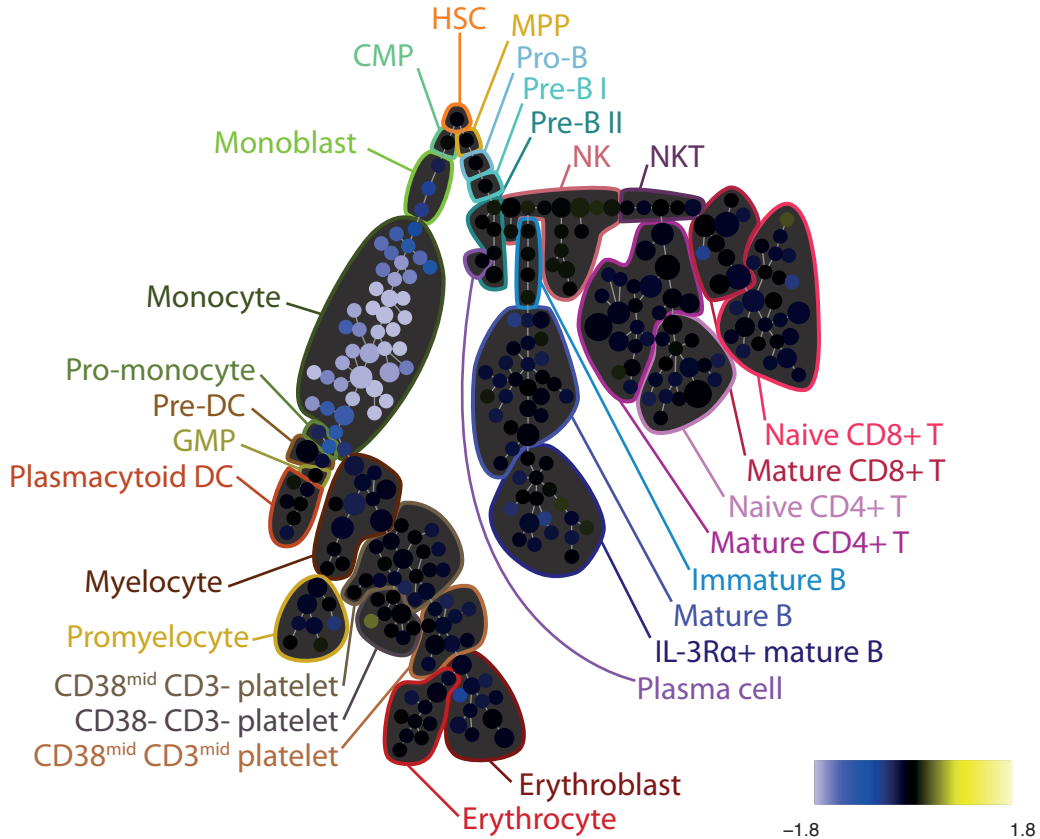



Figure S8B

168-pH3 ---- Dasatinib+IL7 vs Ref Ratio

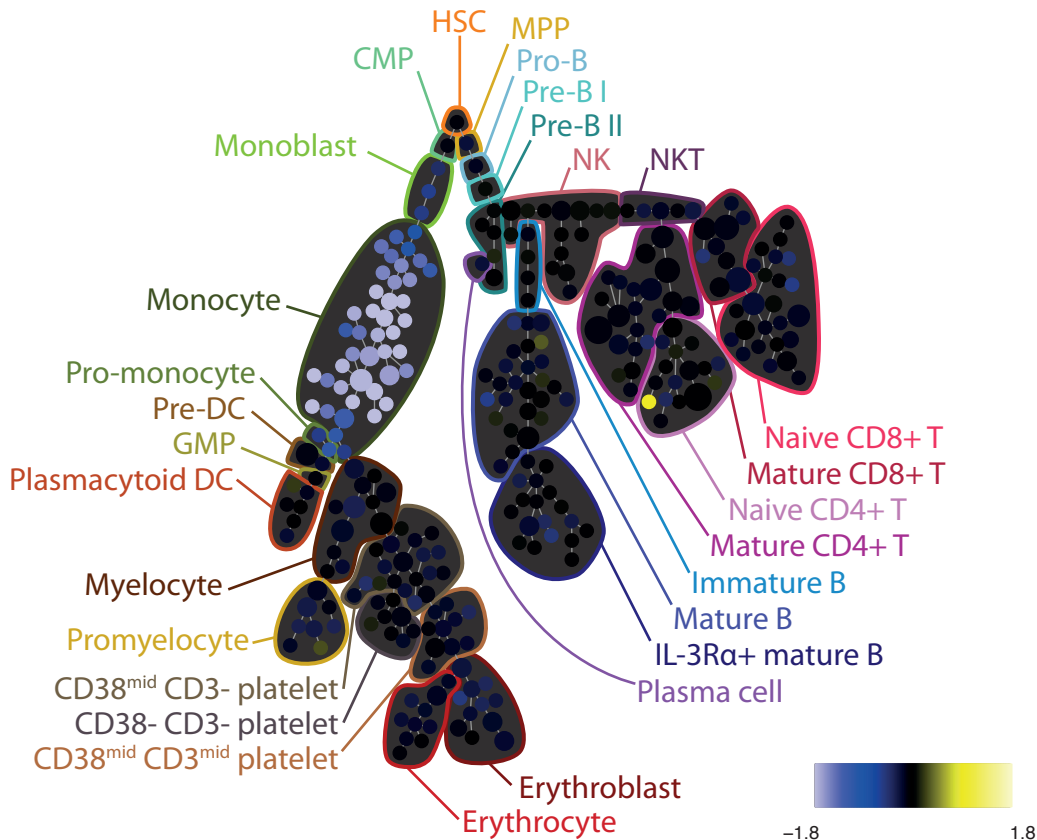

Figure S8B

168-pH3 --- Dasatinib+PMA Aiono vs Ref Ratio

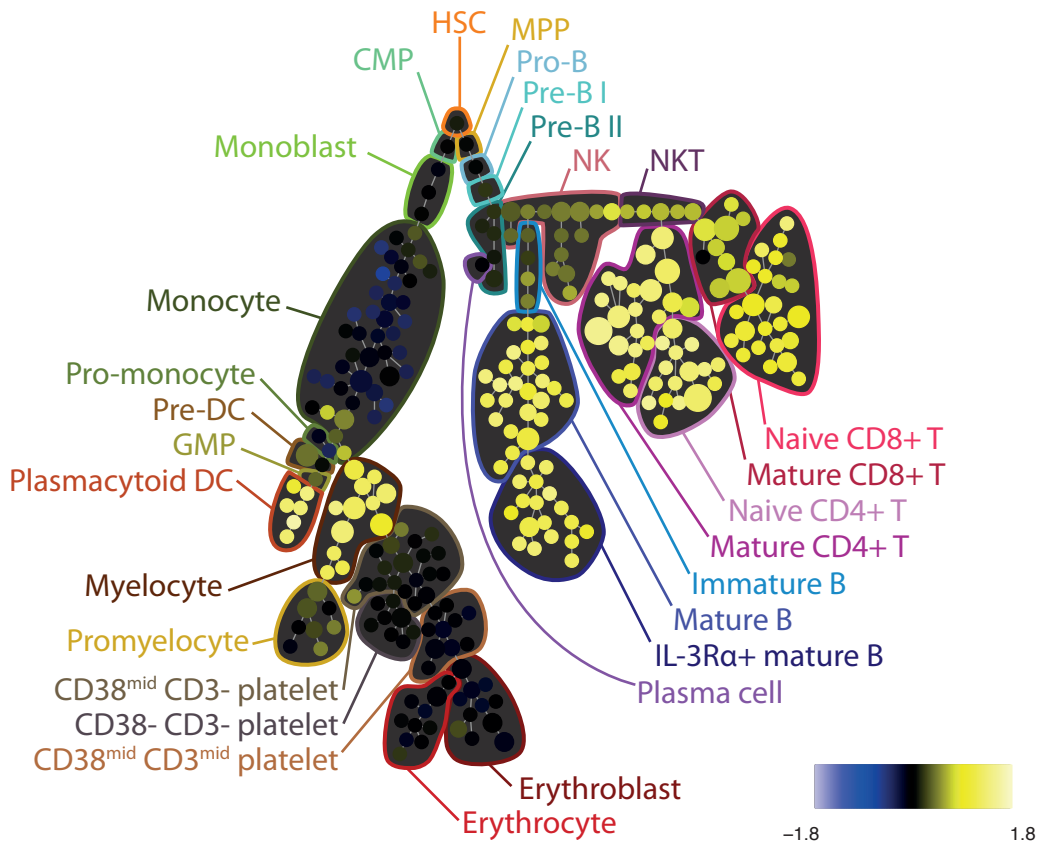

Figure S8B

168-pH3 ---- Dasatinib+PVO4 vs Ref Ratio

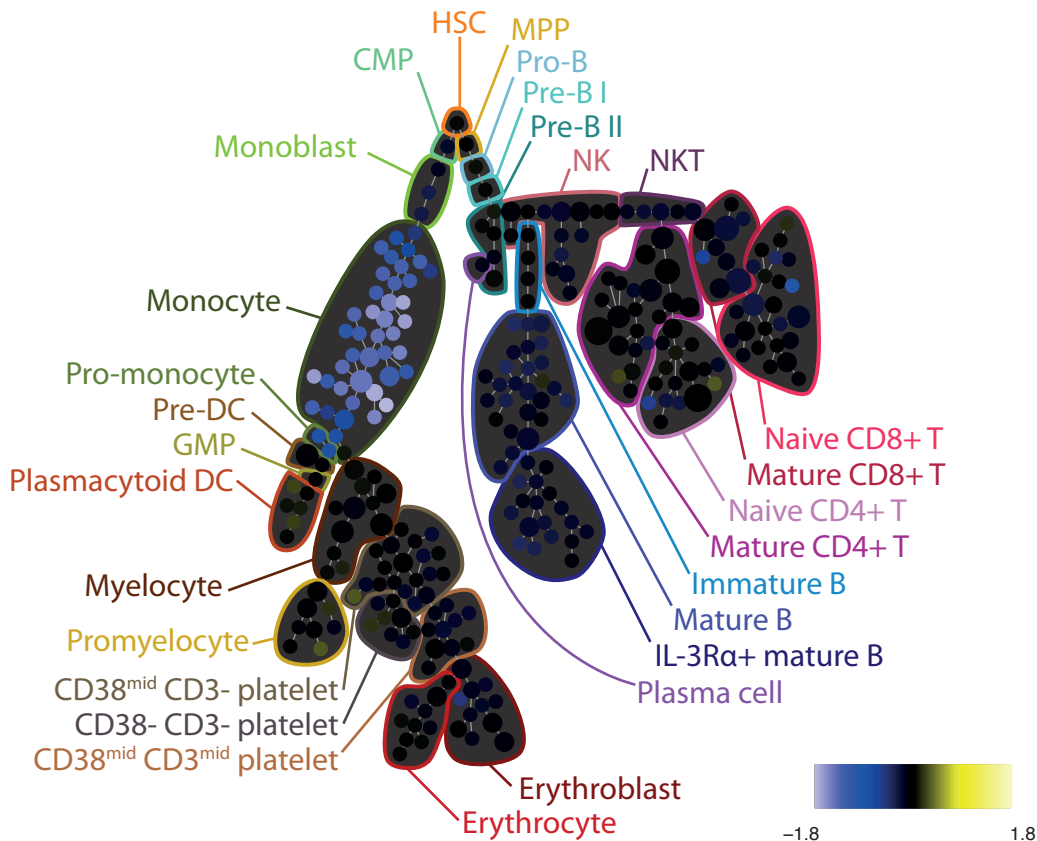

Figure S8B

168-pH3 --- Dasatinib+Unstim vs Ref Ratio

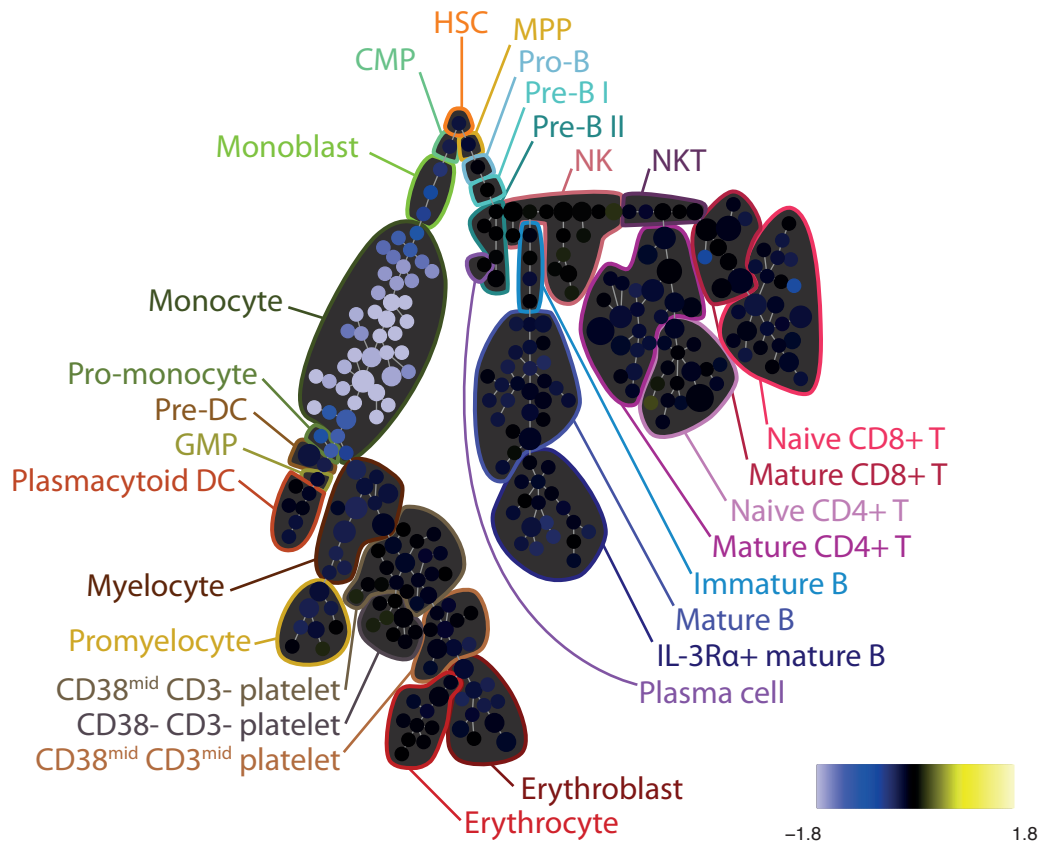

Figure S8B

169-pP38 ---- Dasatinib+BCR vs Ref Ratio

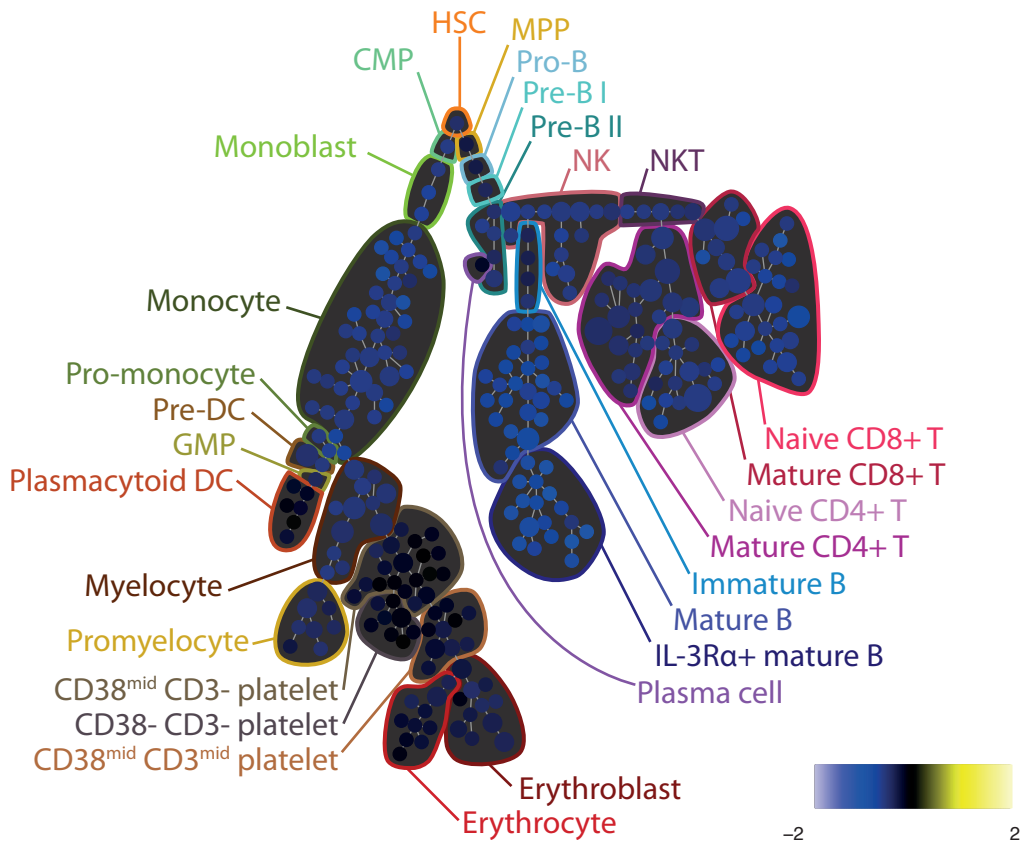

Figure S8B

169-pP38 ---- Dasatinib+Fit3L vs Ref Ratio

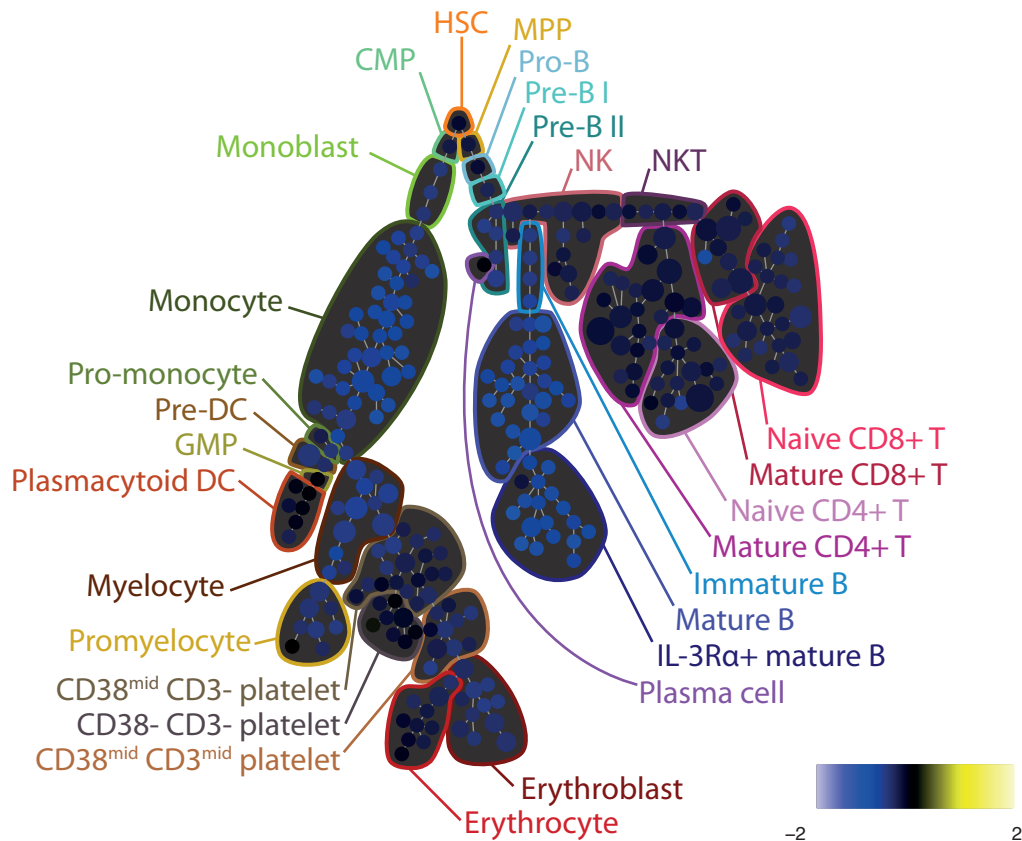

Figure S8B

169-pP38 ---- Dasatinib+IL7 vs Ref Ratio

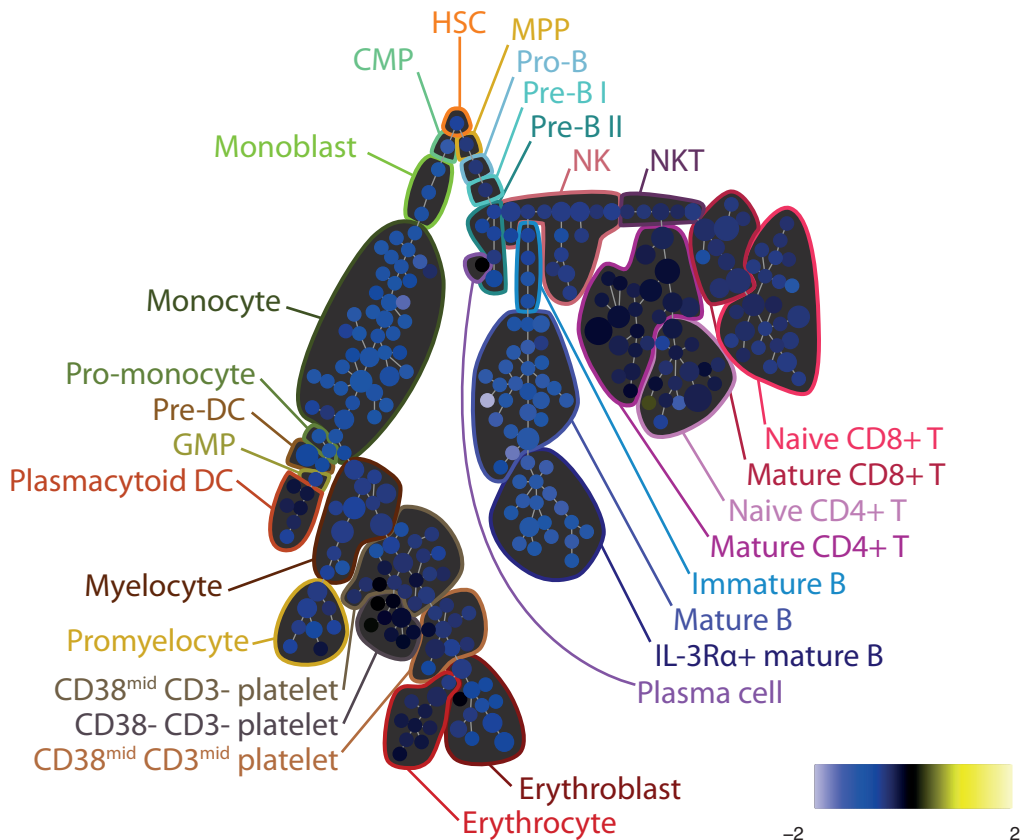

Figure S8B

169-pP38 — Dasatinib+PMAiono vs Ref Ratio

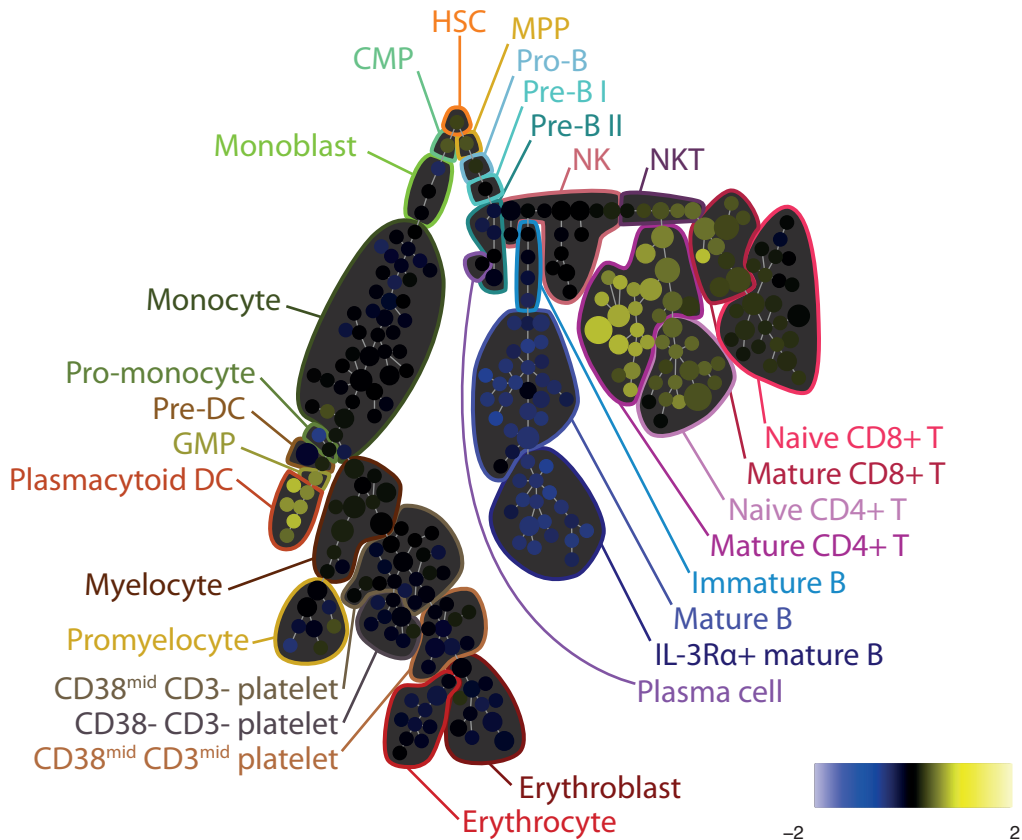



Figure S8B

169-pP38 ---- Dasatinib+PVO4 vs Ref Ratio

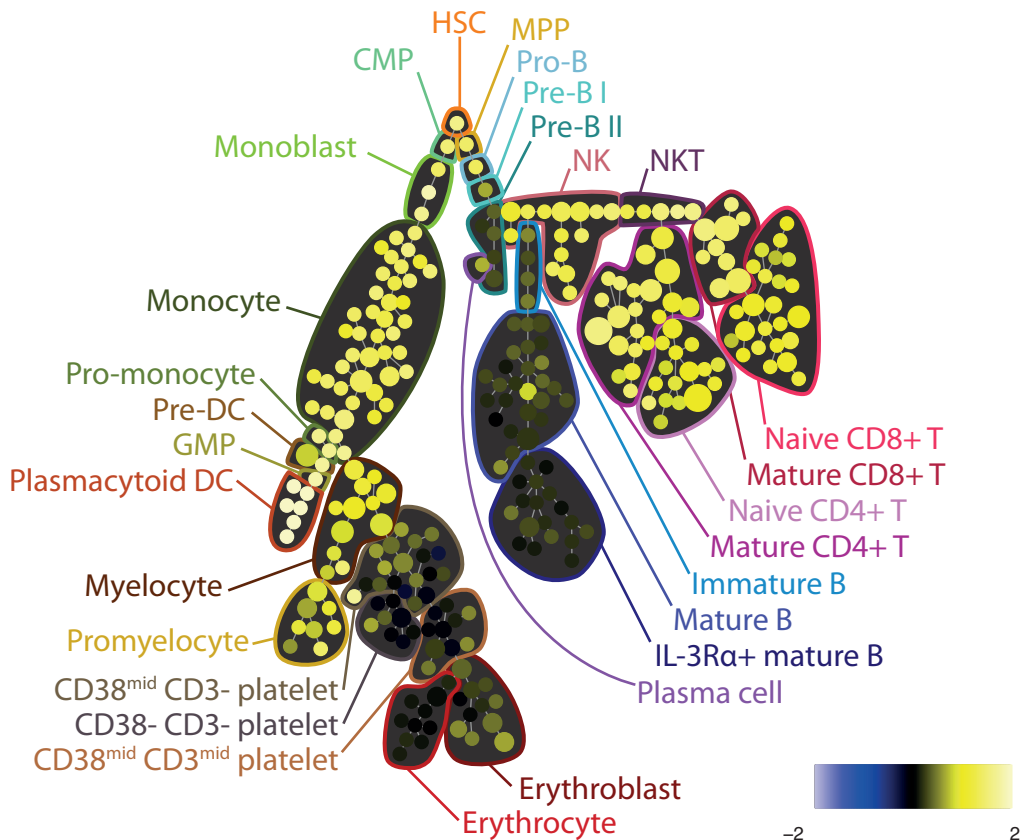

Figure S8B

169-pP38 ---- Dasatinib+Unstim vs Ref Ratio

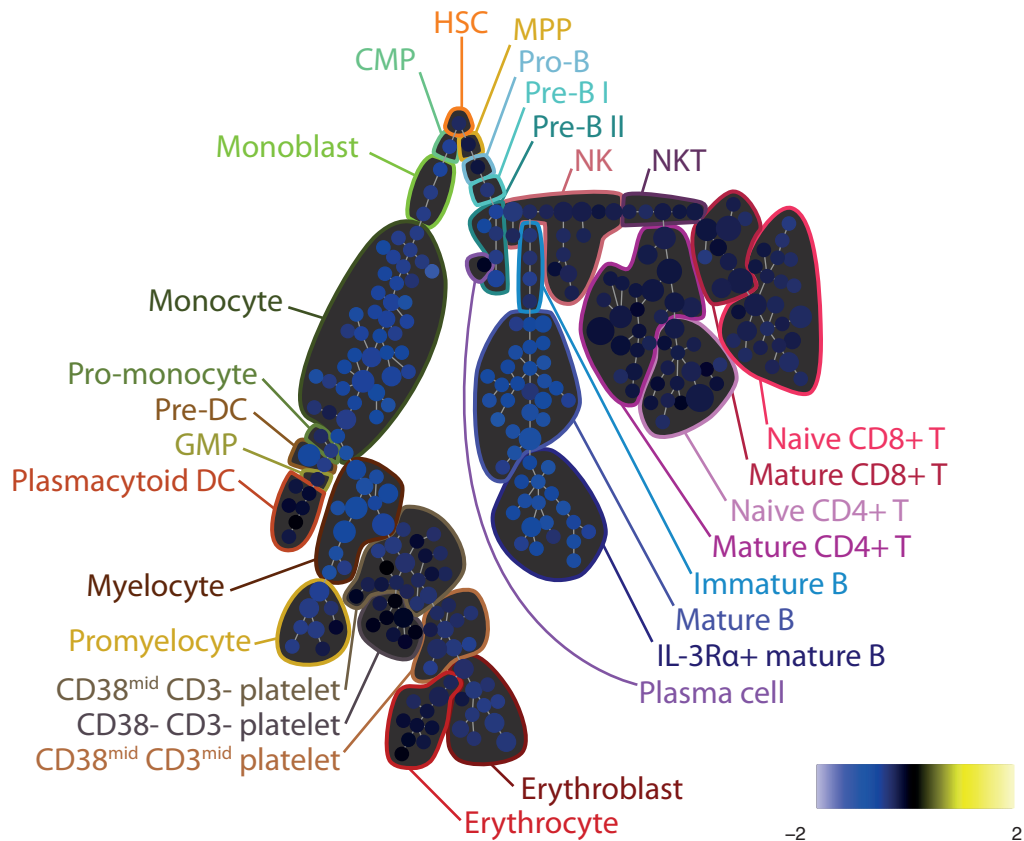

Figure S8B

171-pBtk/Itk ---- Dasatinib+BCR vs Ref Ratio

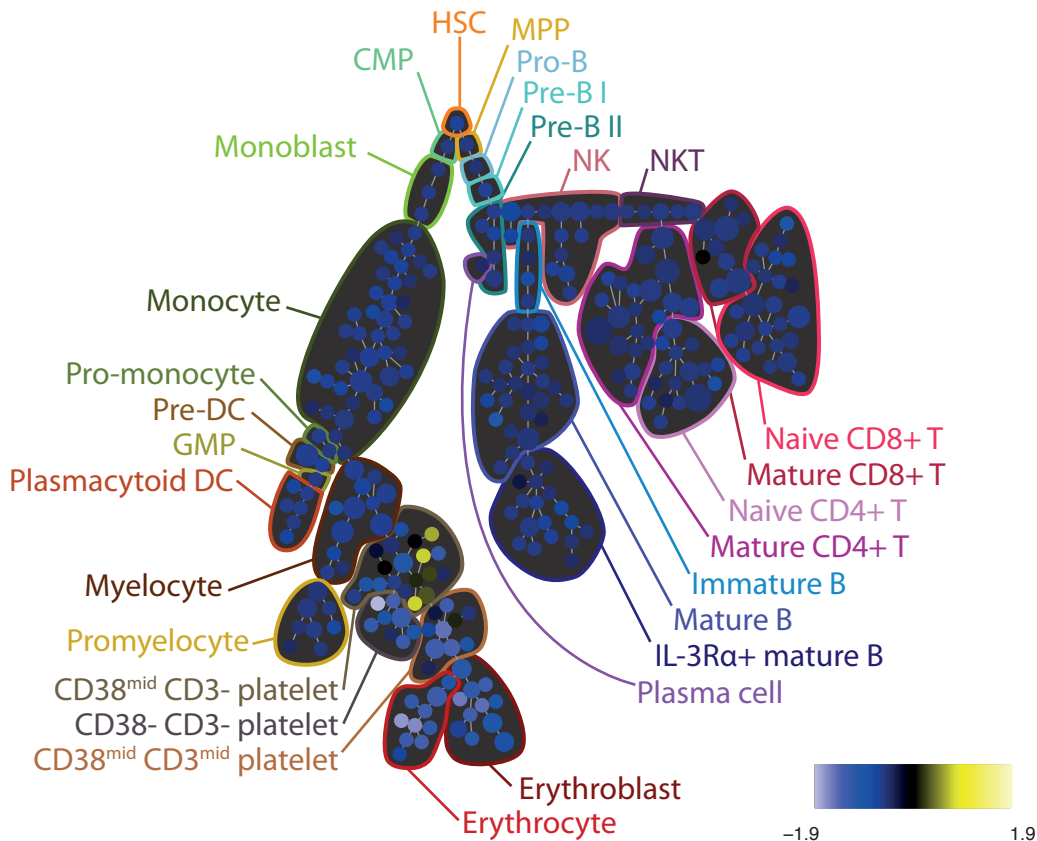

Figure S8B

171-pBtk/Itk ---- Dasatinib+Flt3L vs Ref Ratio

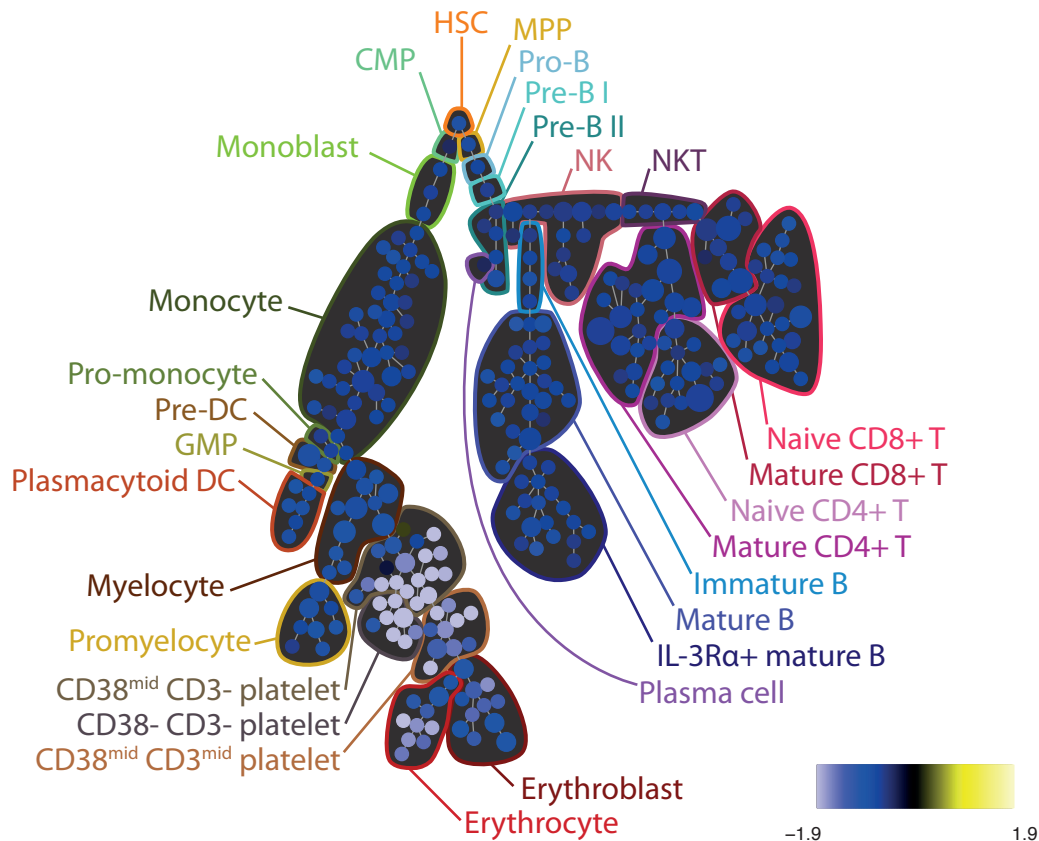

Figure S8B

171-pBtk/Itk — Dasatinib+IL7 vs Ref Ratio

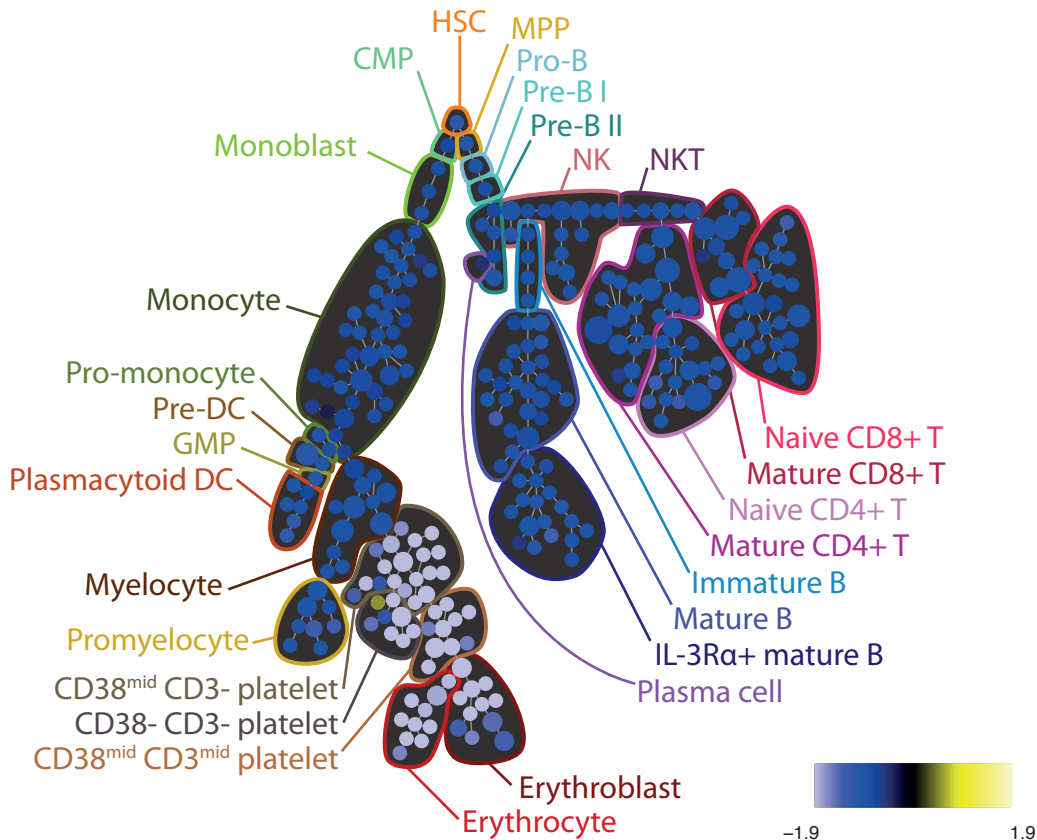

Figure S8B

171-pBtk/Itk ---- Dasatinib+PMAiono vs Ref Ratio

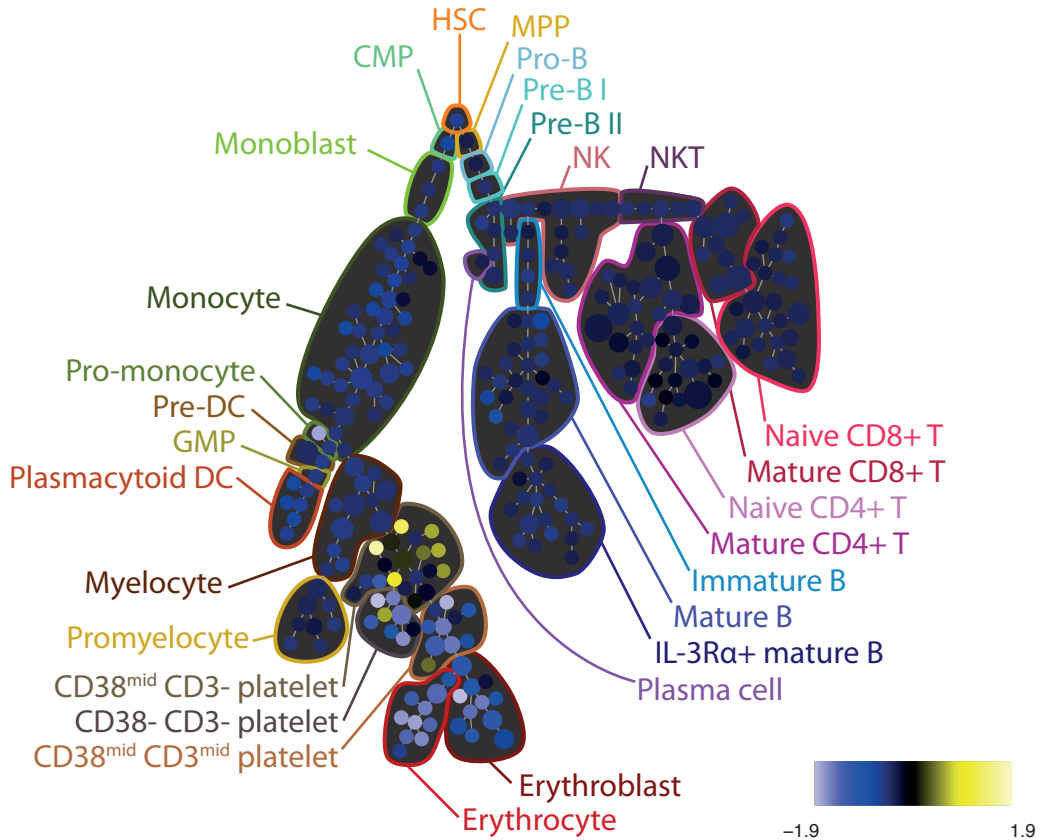

Figure S8B

171-pBtk/Itk — Dasatinib+PVO4 vs Ref Ratio

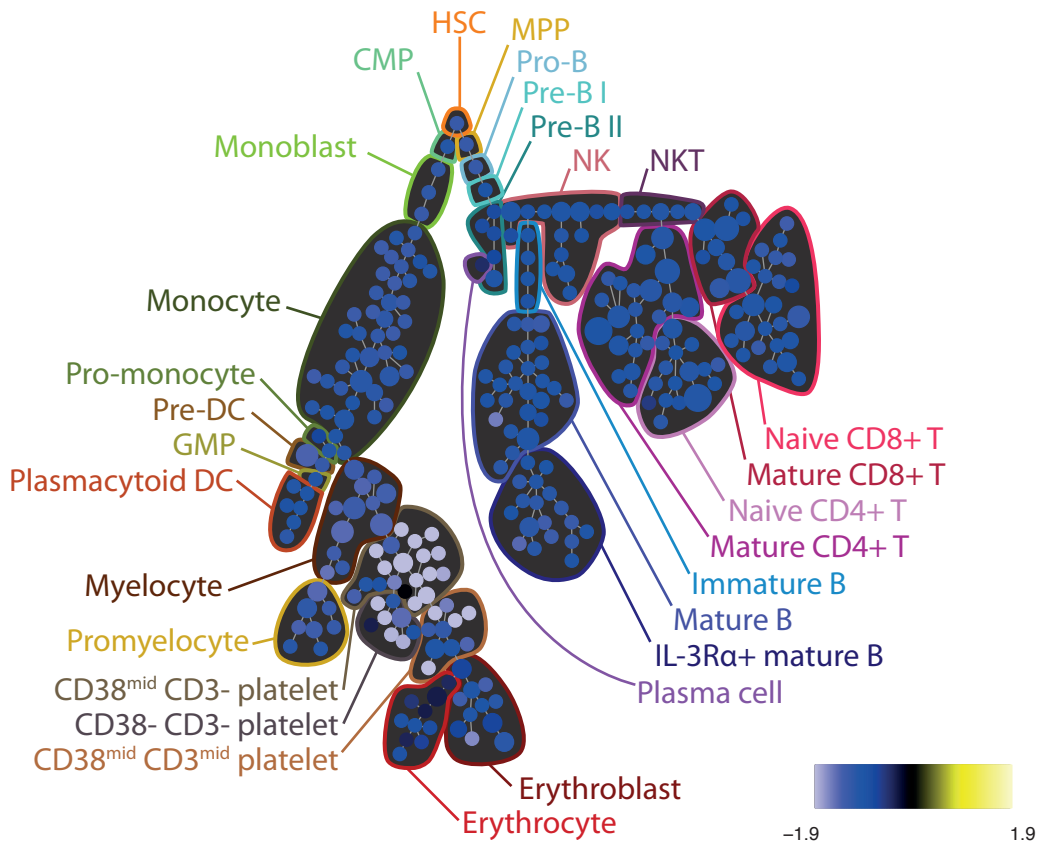

Figure S8B

171-pBtk/Itk ---- Dasatinib+Unstim vs Ref Ratio

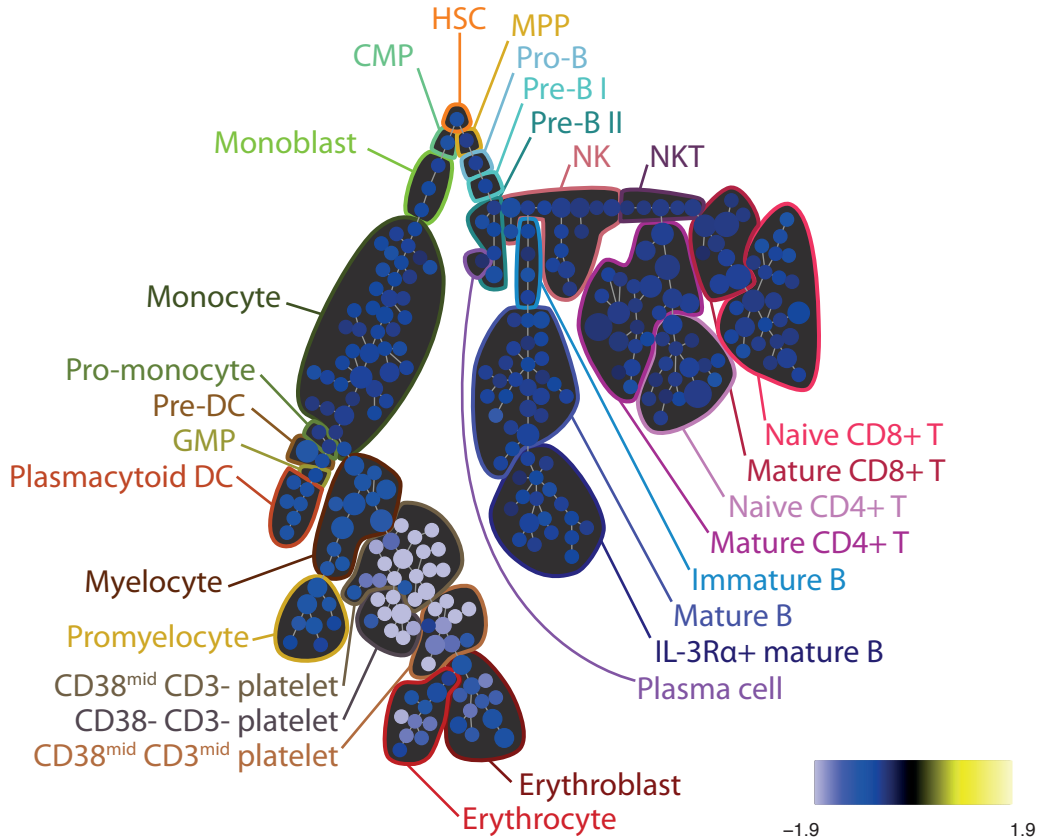



Figure S8B

172-pS6 ---- Dasatinib+BCR vs Ref Ratio

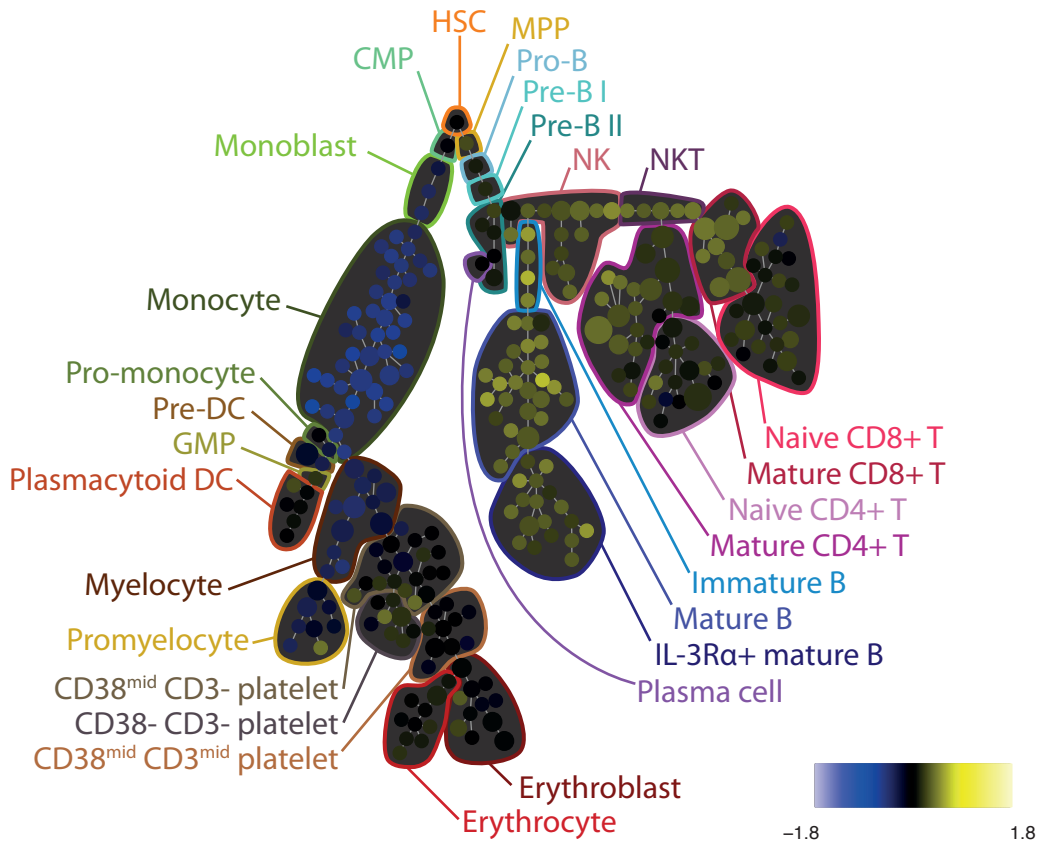

Figure S8B

172-pS6 ---- Dasatinib+Flt3L vs Ref Ratio

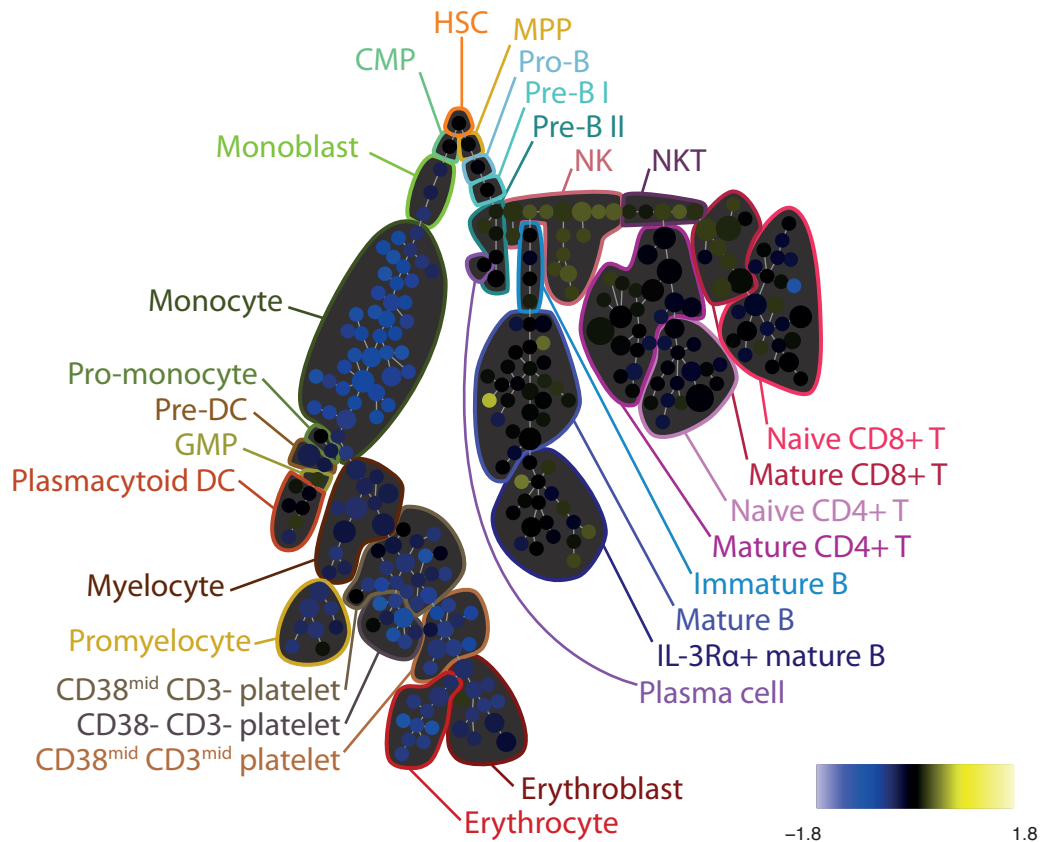

Figure S8B

172-pS6 ---- Dasatinib+IL7 vs Ref Ratio

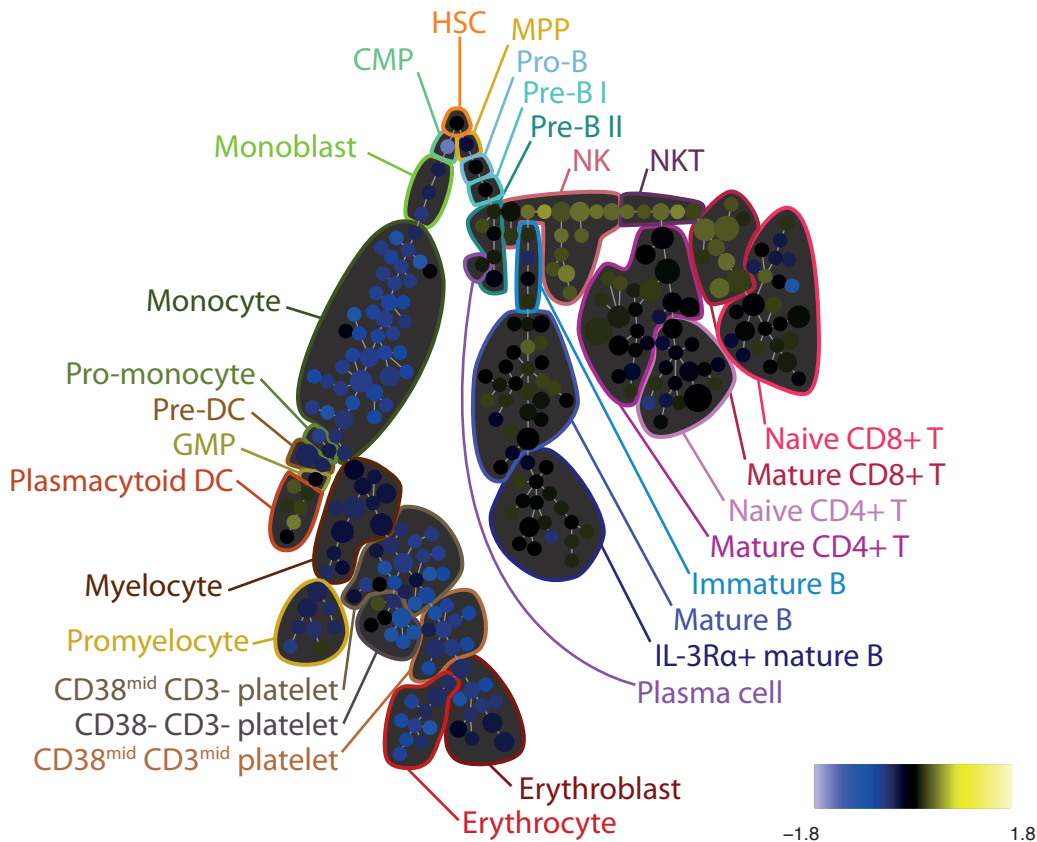

Figure S8B

172-pS6 --- Dasatinib+PMAiono vs Ref Ratio

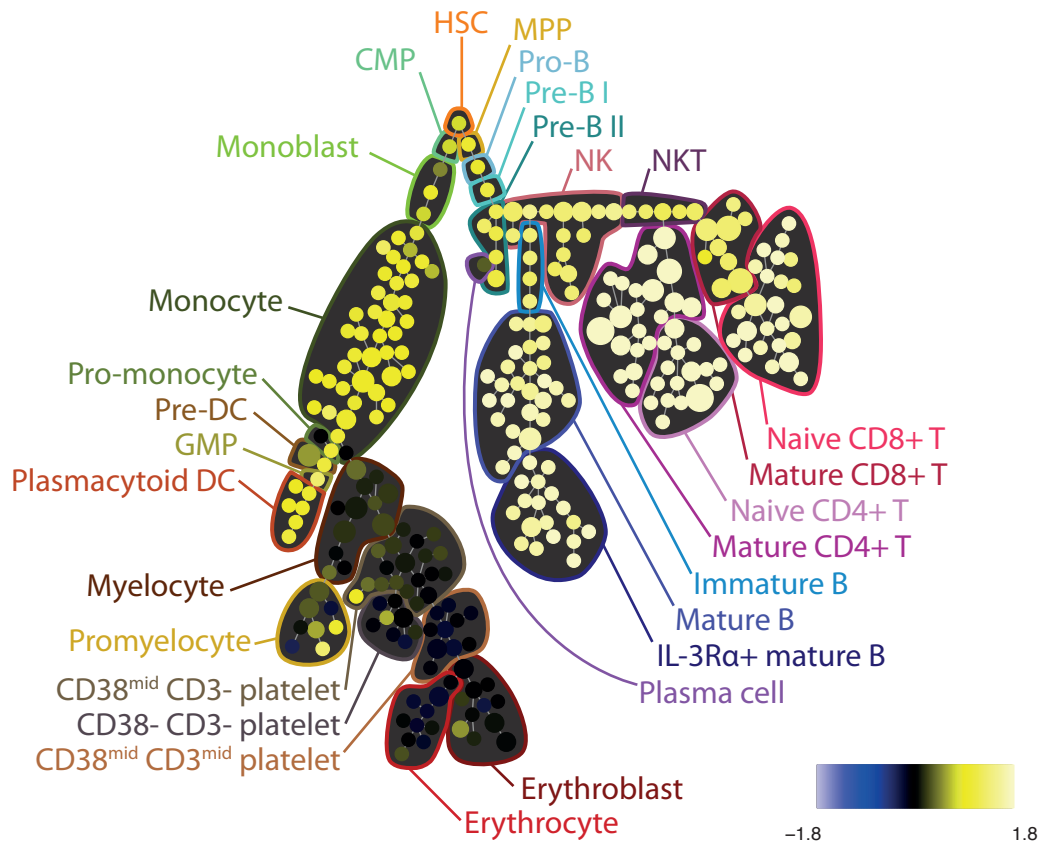

Figure S8B

172-pS6 ---- Dasatinib+PVO4 vs Ref Ratio

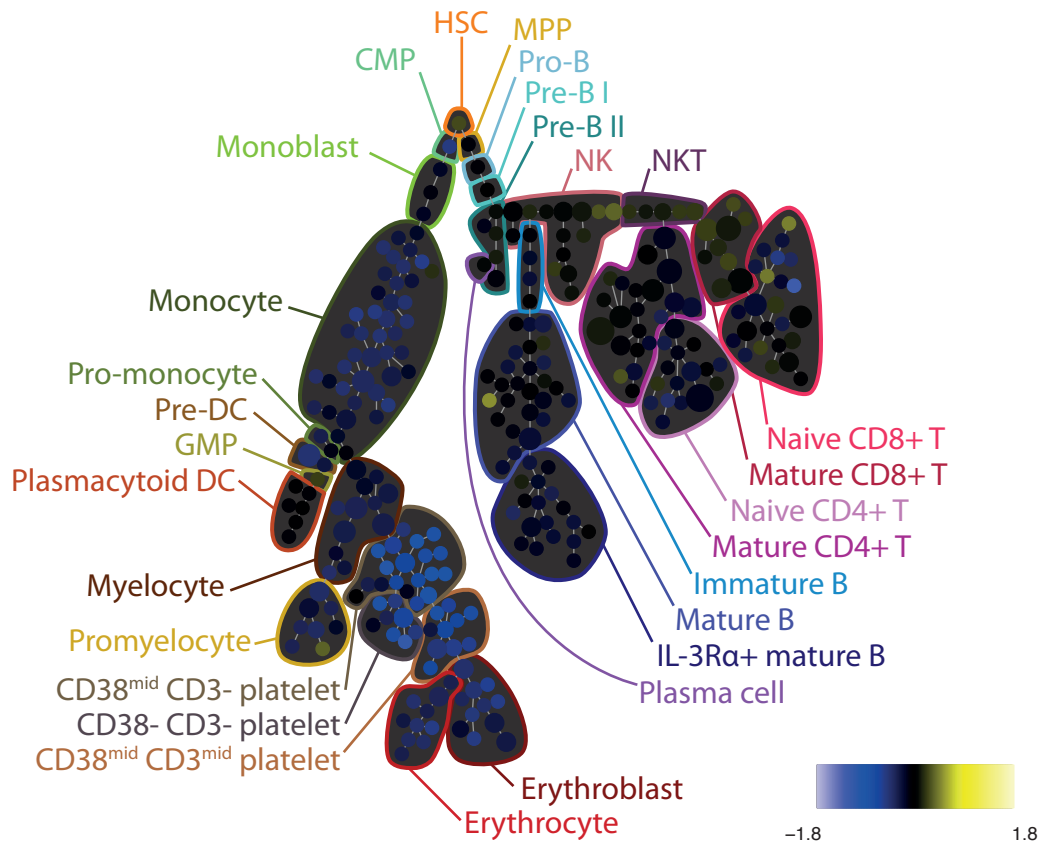

Figure S8B

172-pS6 --- Dasatinib+Unstim vs Ref Ratio

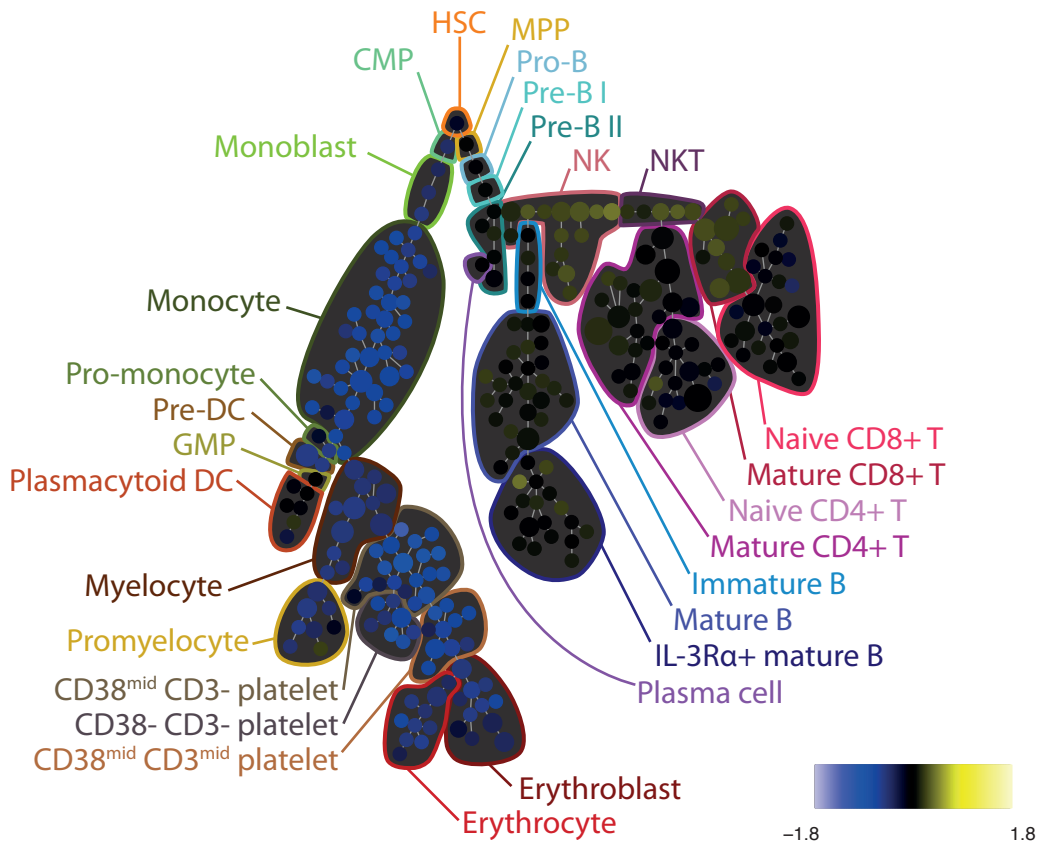

Figure S8B

174-pSrcFK ---- Dasatinib+BCR vs Ref Ratio

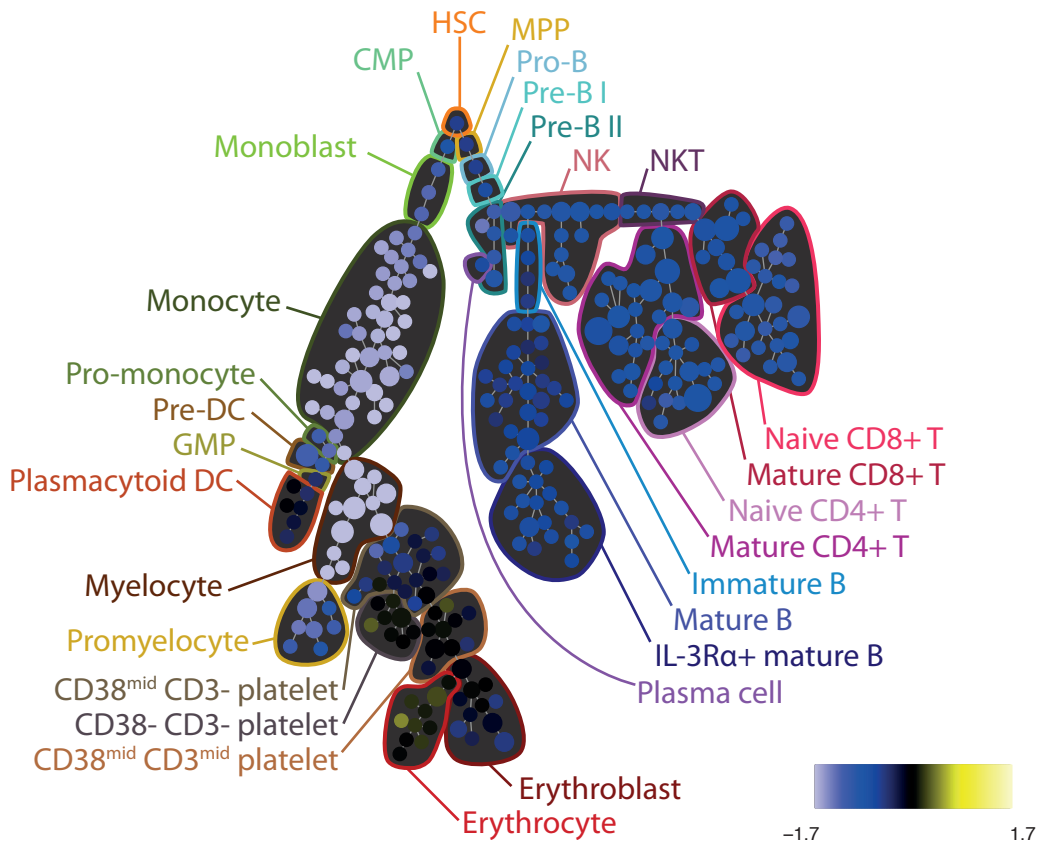

Figure S8B

174-pSrcFK --- Dasatinib+Flt3L vs Ref Ratio

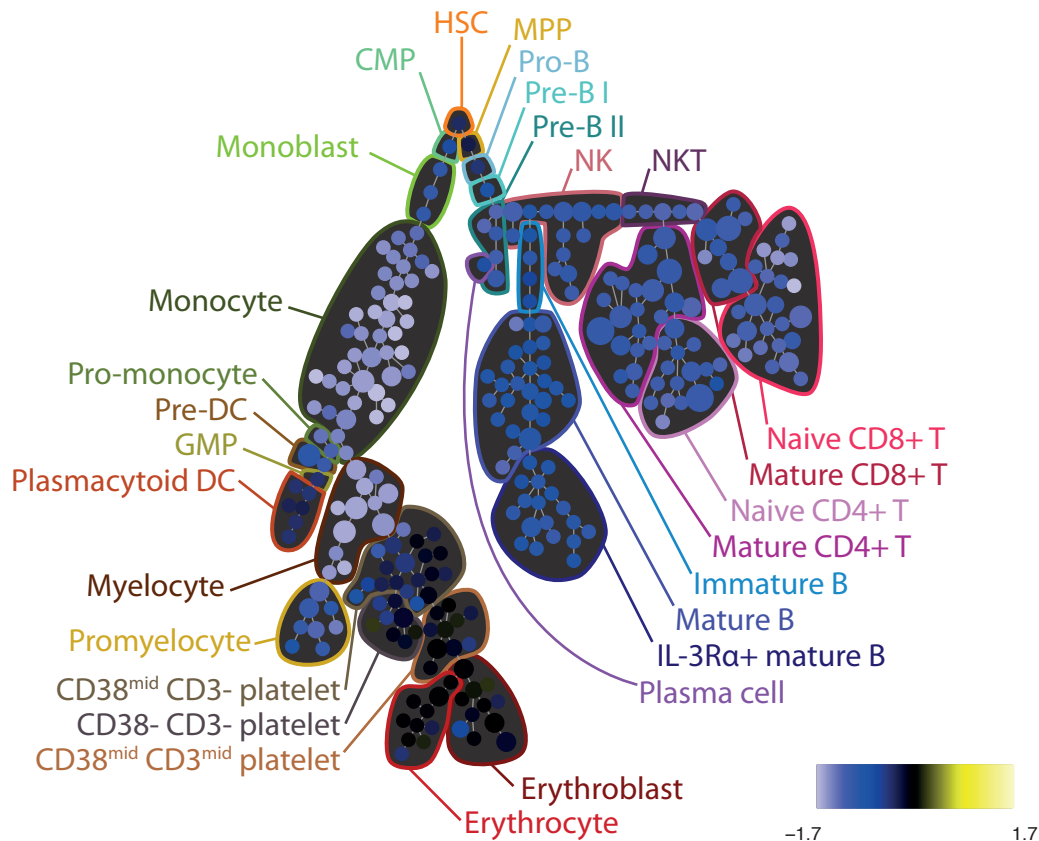



Figure S8B

174-pSrcFK — Dasatinib+IL7 vs Ref Ratio

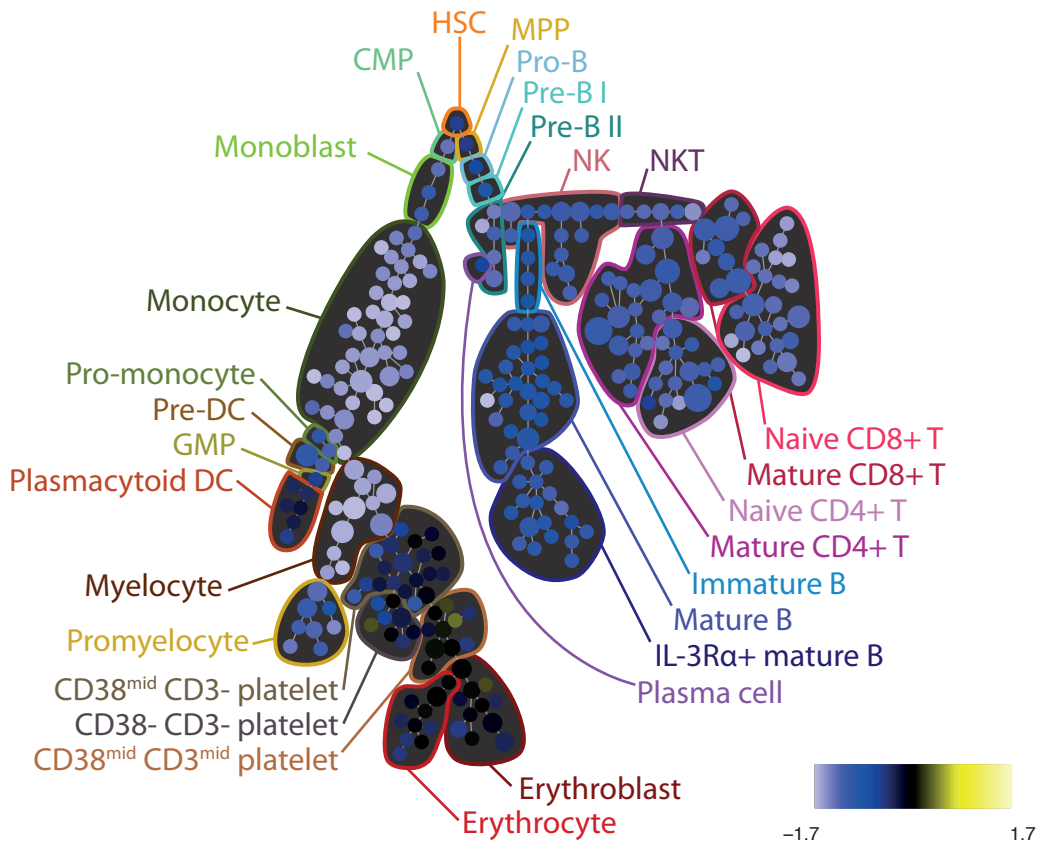

Figure S8B

174-pSrcFK ---- Dasatinib+PMAiono vs Ref Ratio

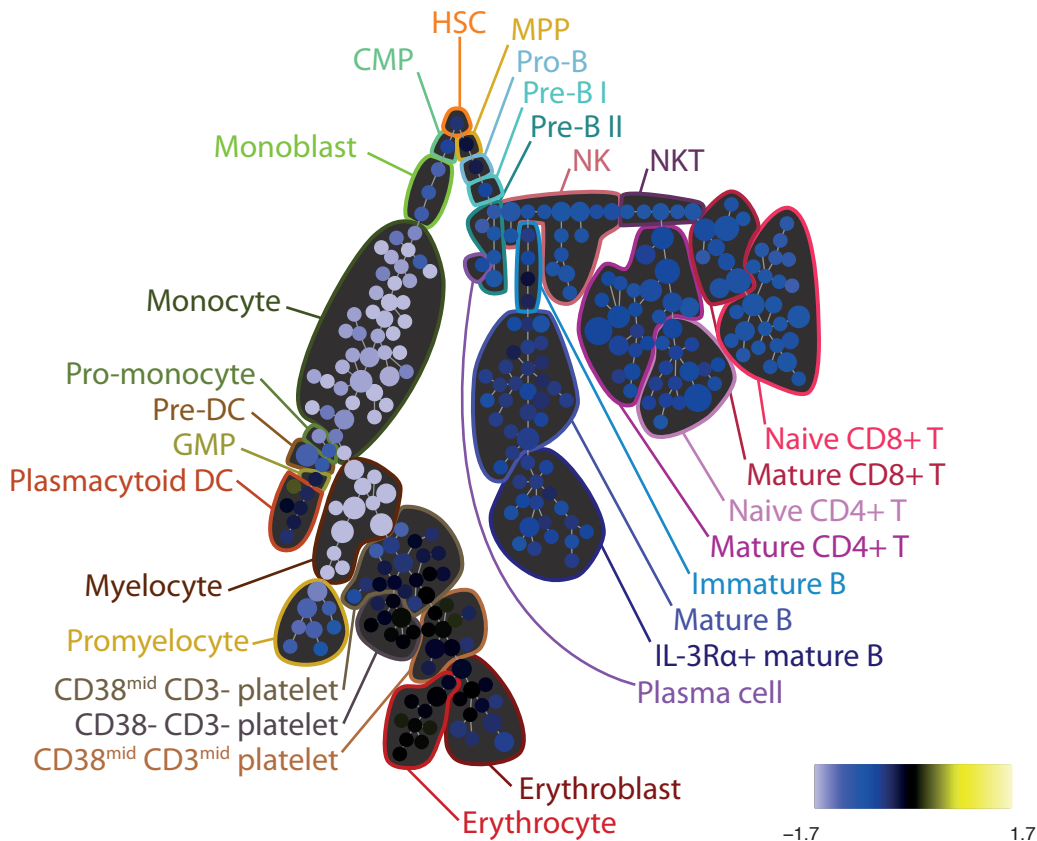

Figure S8B

174-pSrcFK — Dasatinib+PVO4 vs Ref Ratio

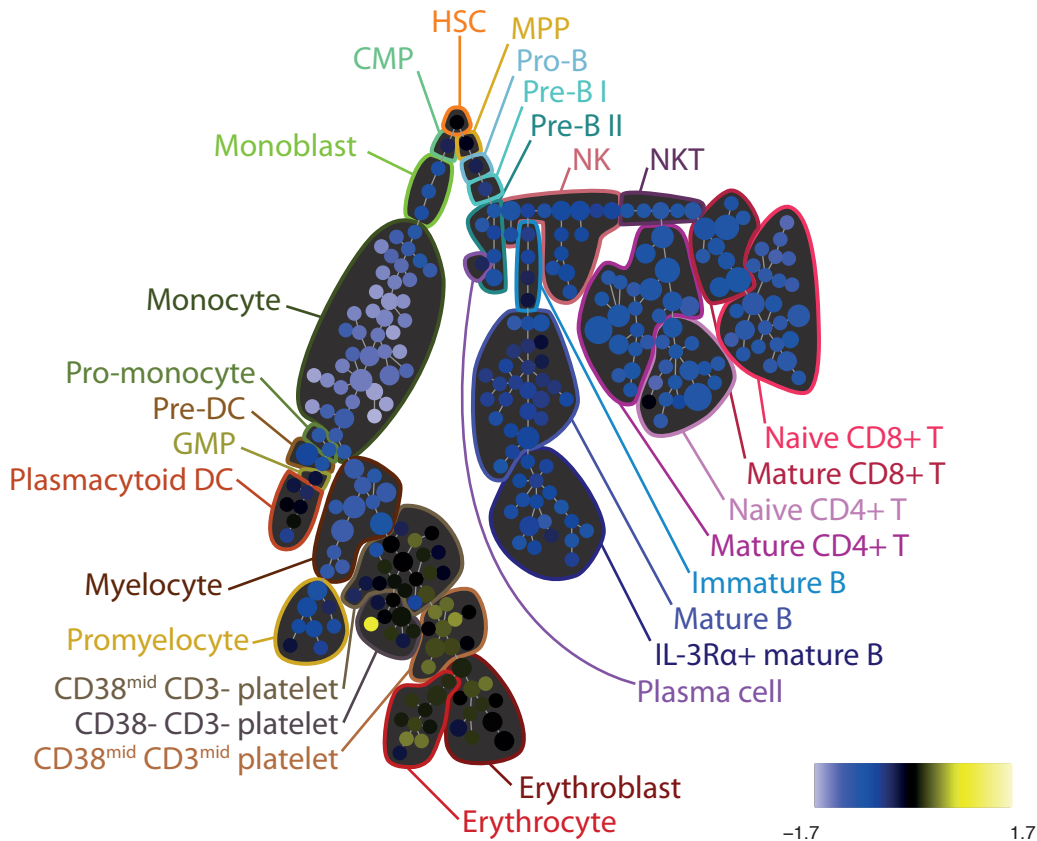

Figure S8B

174-pSrcFK ---- Dasatinib+Unstim vs Ref Ratio

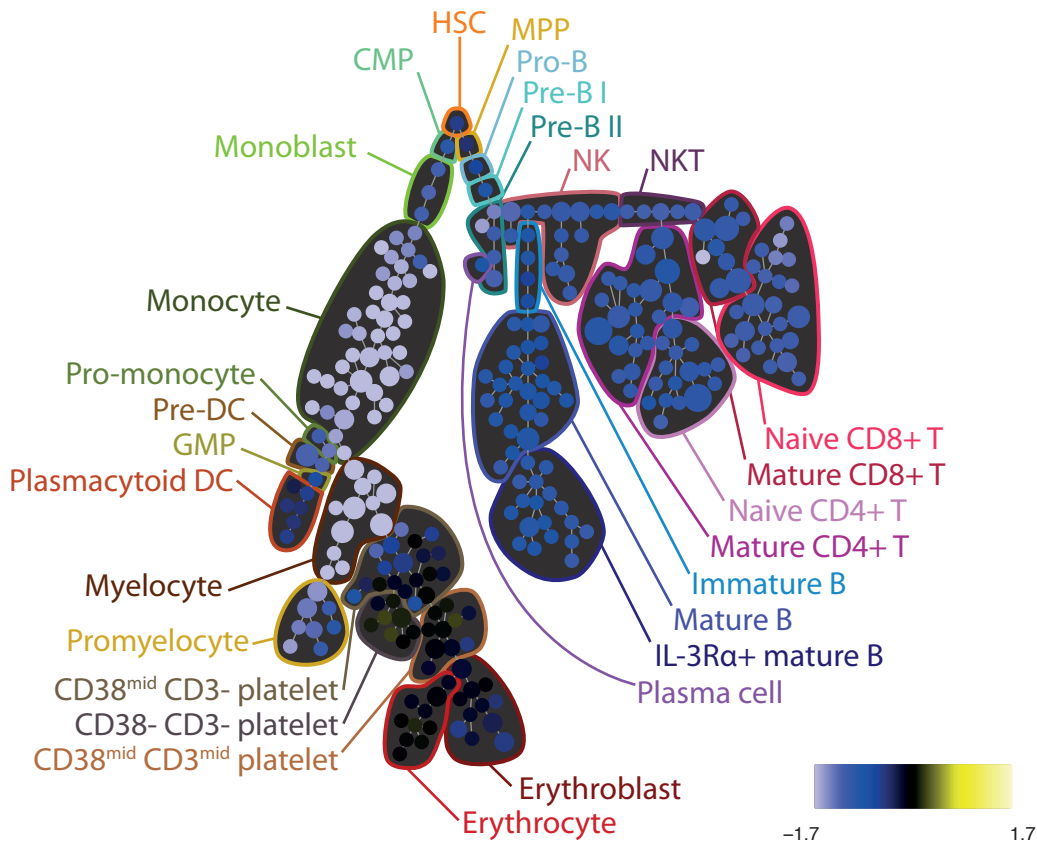

Figure S8B

175-pCrkL ---- Dasatinib+BCR vs Ref Ratio

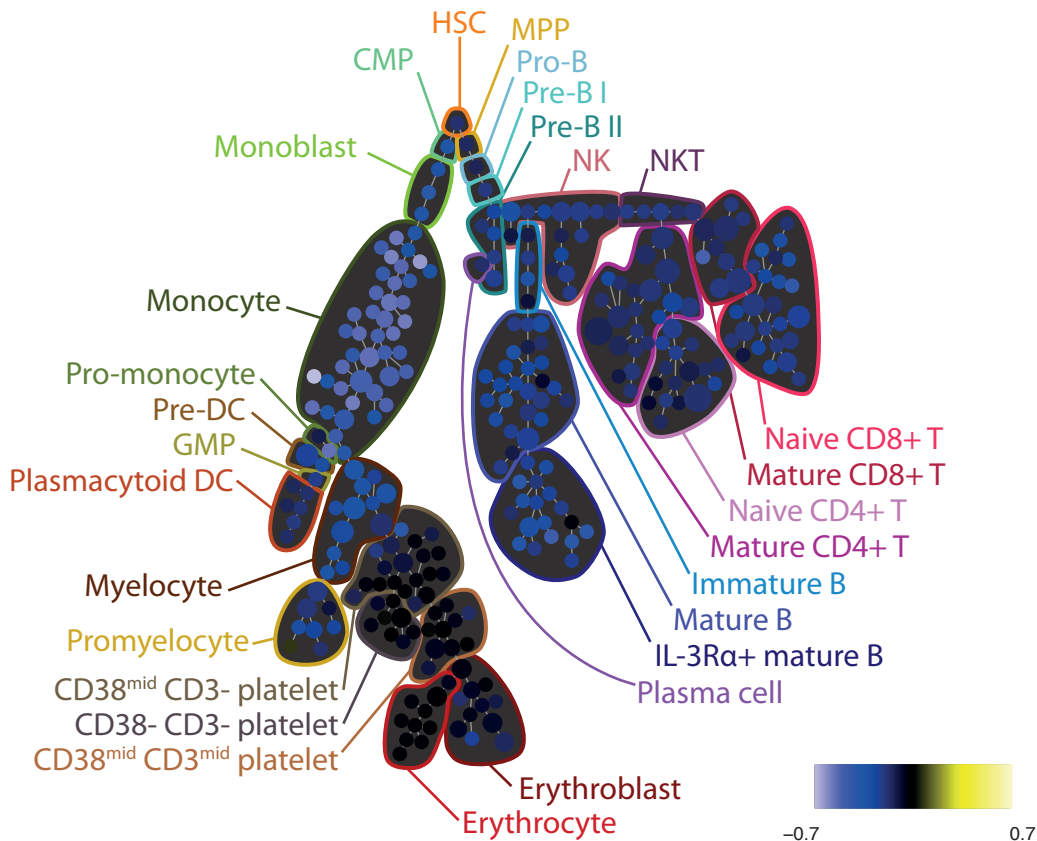

Figure S8B

175-pCrKL ---- Dasatinib+Flt3L vs Ref Ratio

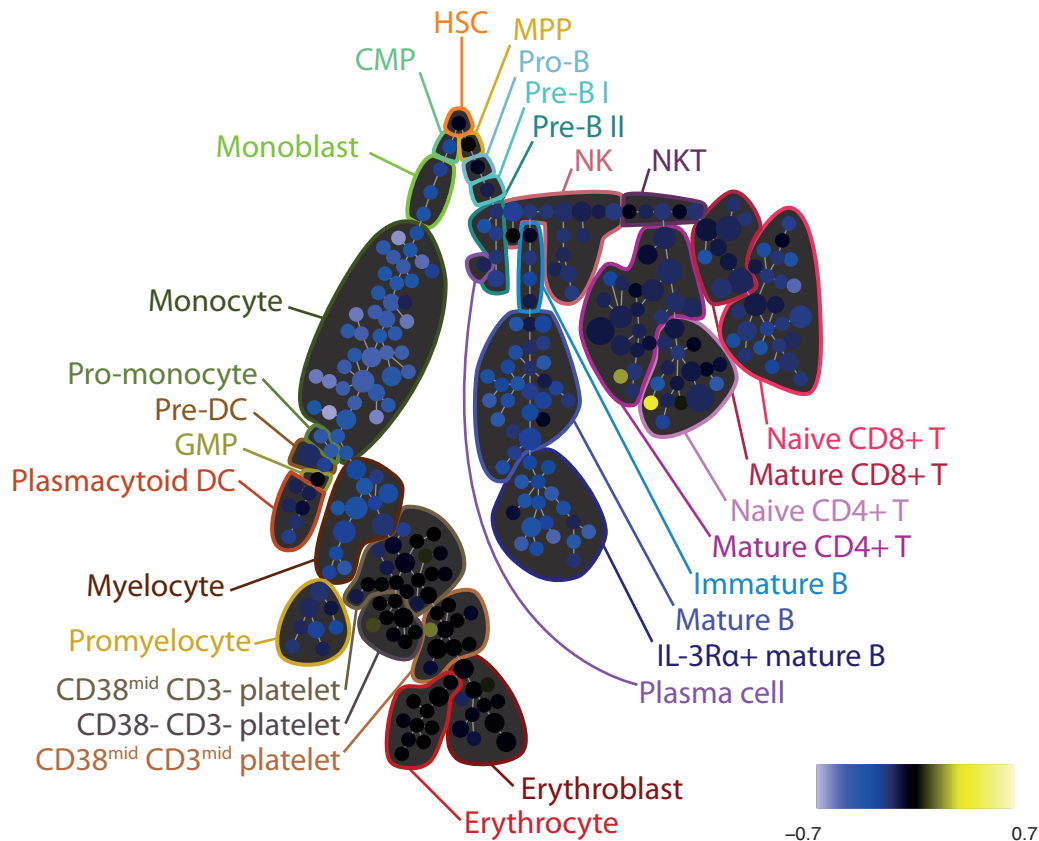

Figure S8B

175-pCrkL ---- Dasatinib+IL7 vs Ref Ratio

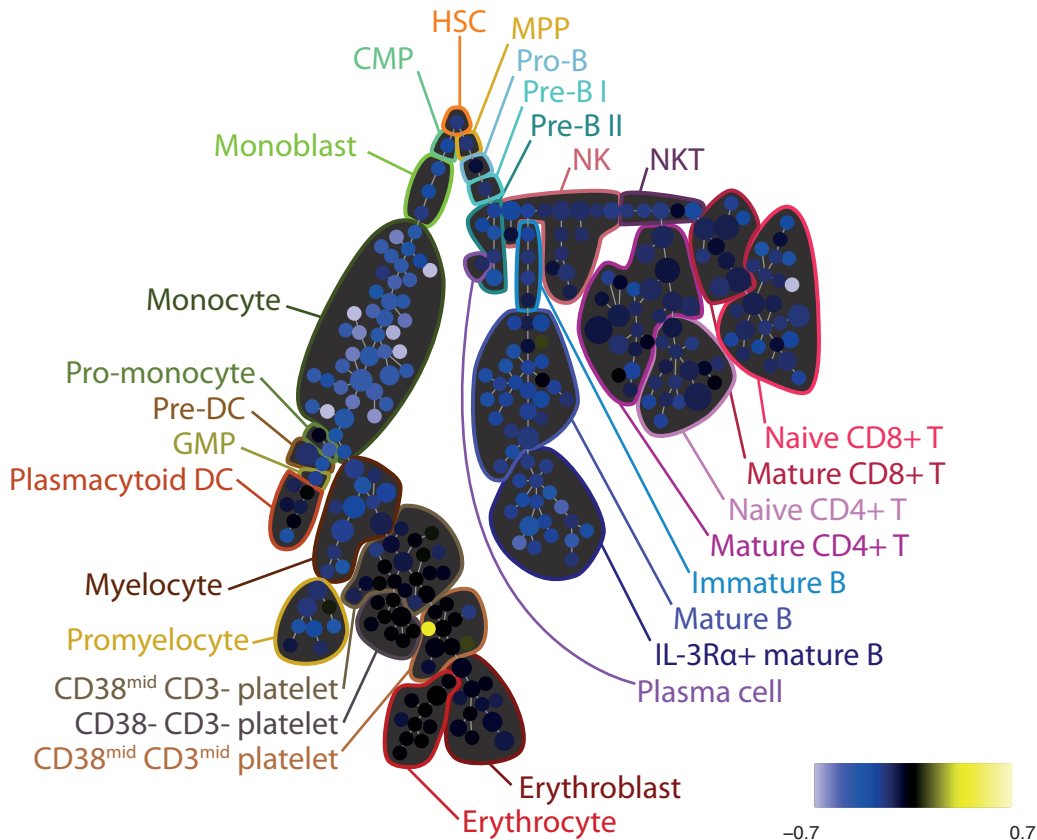

Figure S8B

175-pCrkL --- Dasatinib+PMAiono vs Ref Ratio

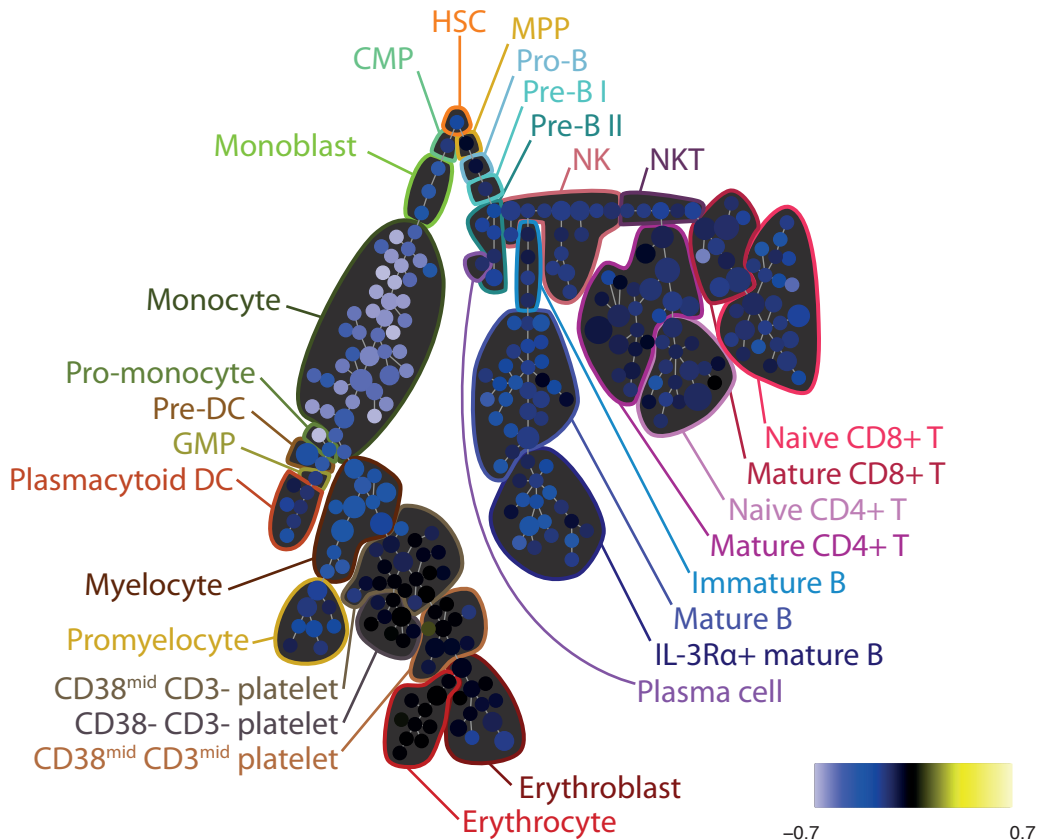



Figure S8B

175-pCrkL ---- Dasatinib+PVO4 vs Ref Ratio

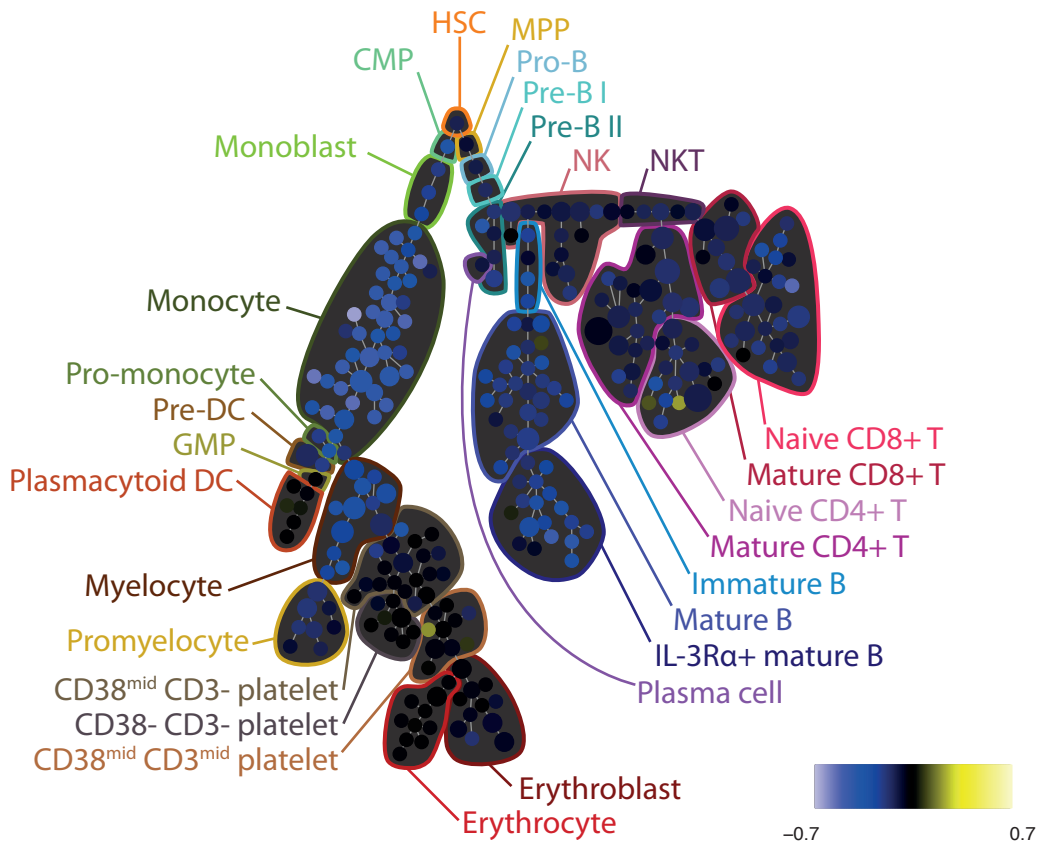

Figure S8B

175-pCrkL ---- Dasatinib+Unstim vs Ref Ratio

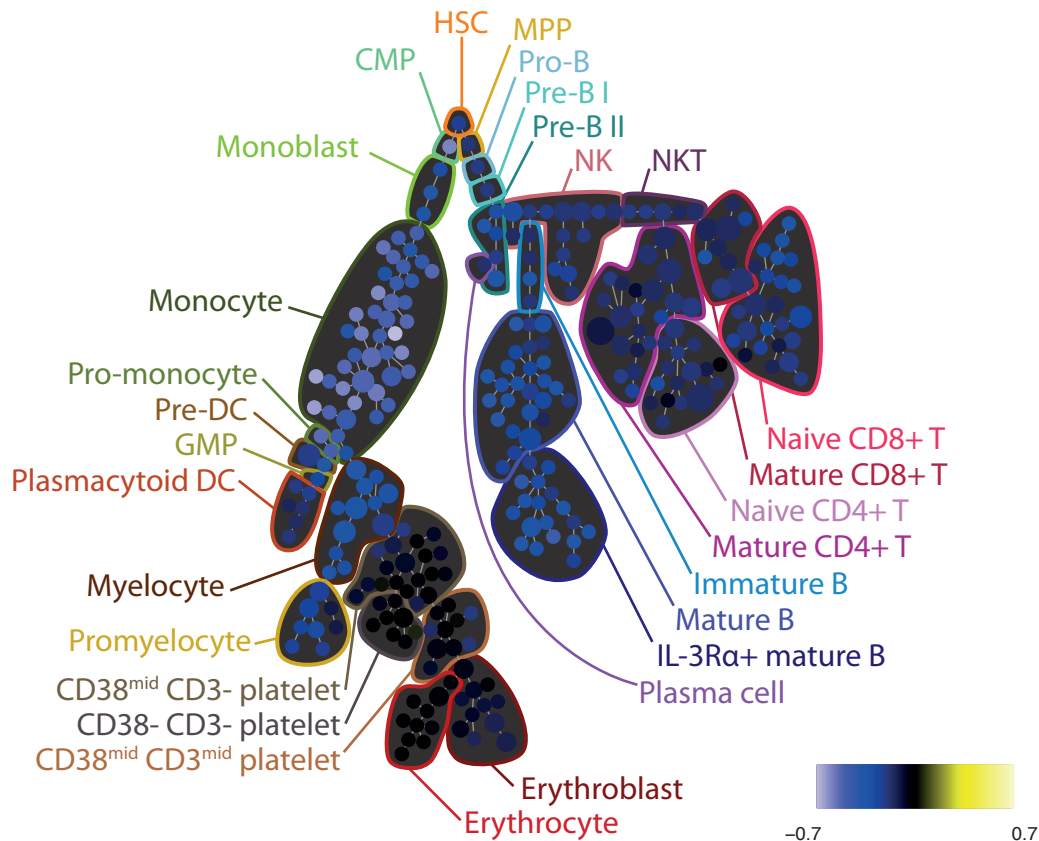

Figure S8B

176-pCREB ---- Dasatinib+BCR vs Ref Ratio

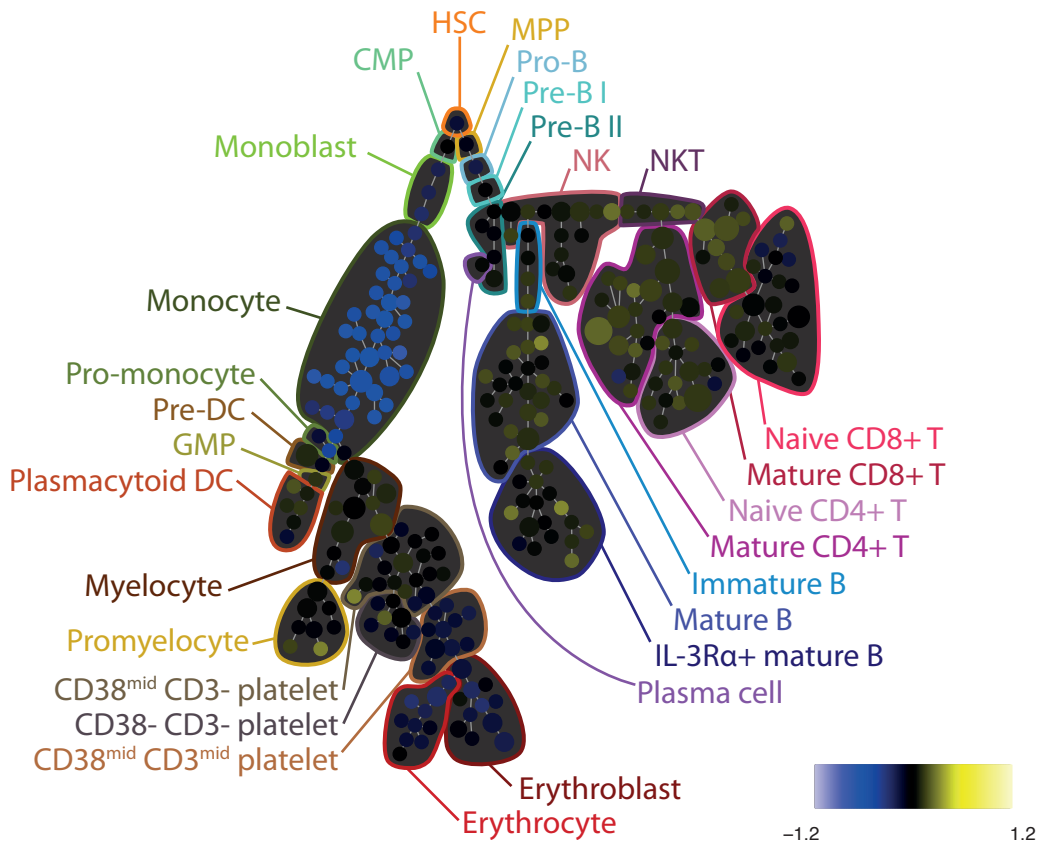

Figure S8B

176-pCREB ---- Dasatinib+Flt3L vs Ref Ratio

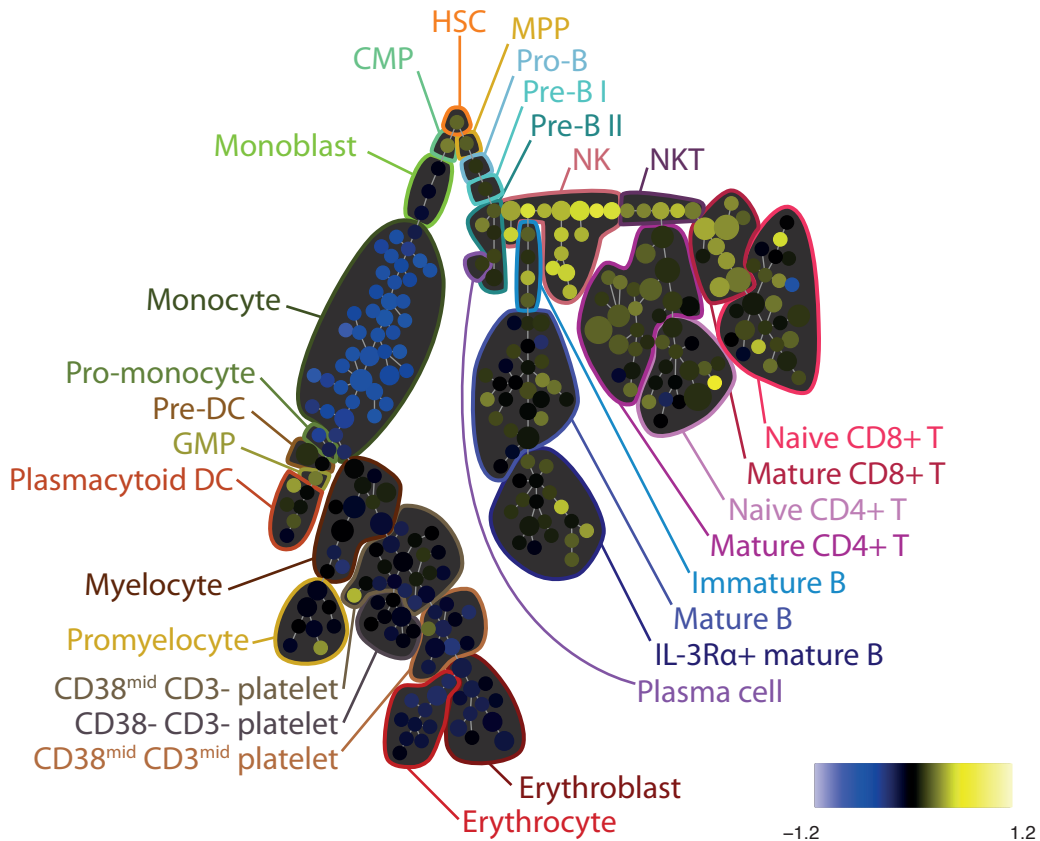

Figure S8B

176-pCREB — Dasatinib+IL7 vs Ref Ratio

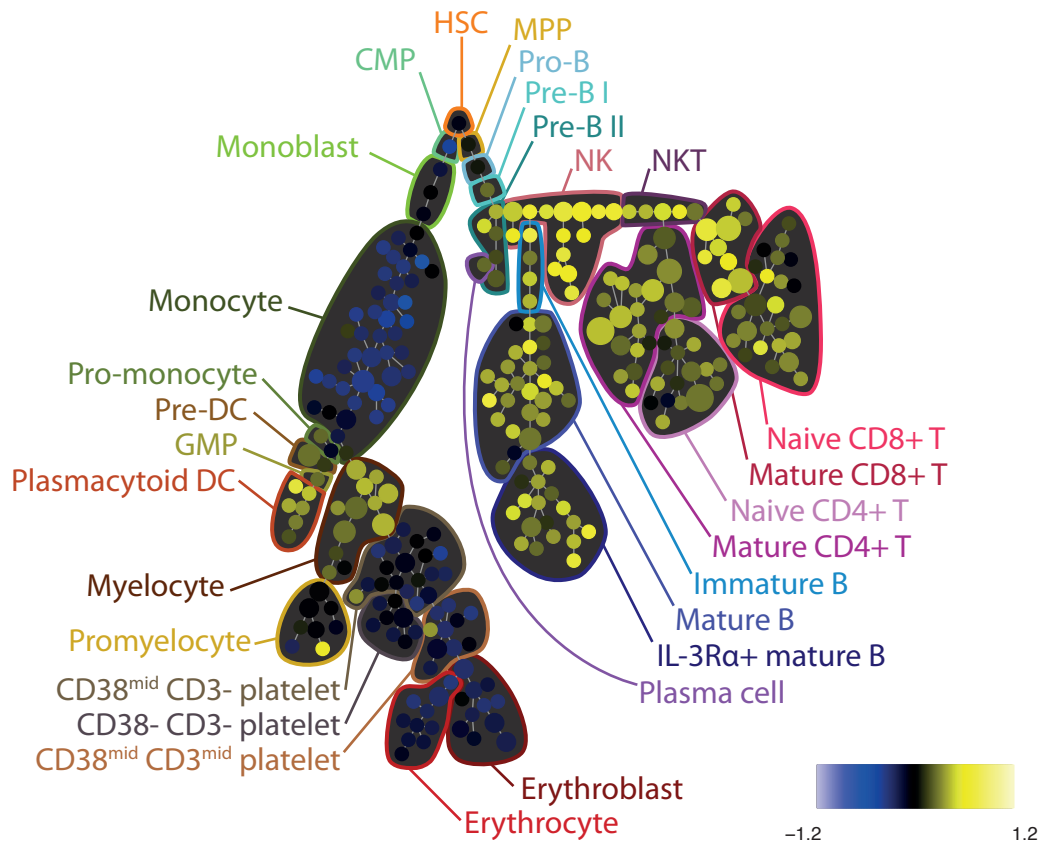

Figure S8B

176-pCREB ---- Dasatinib+PMAiono vs Ref Ratio

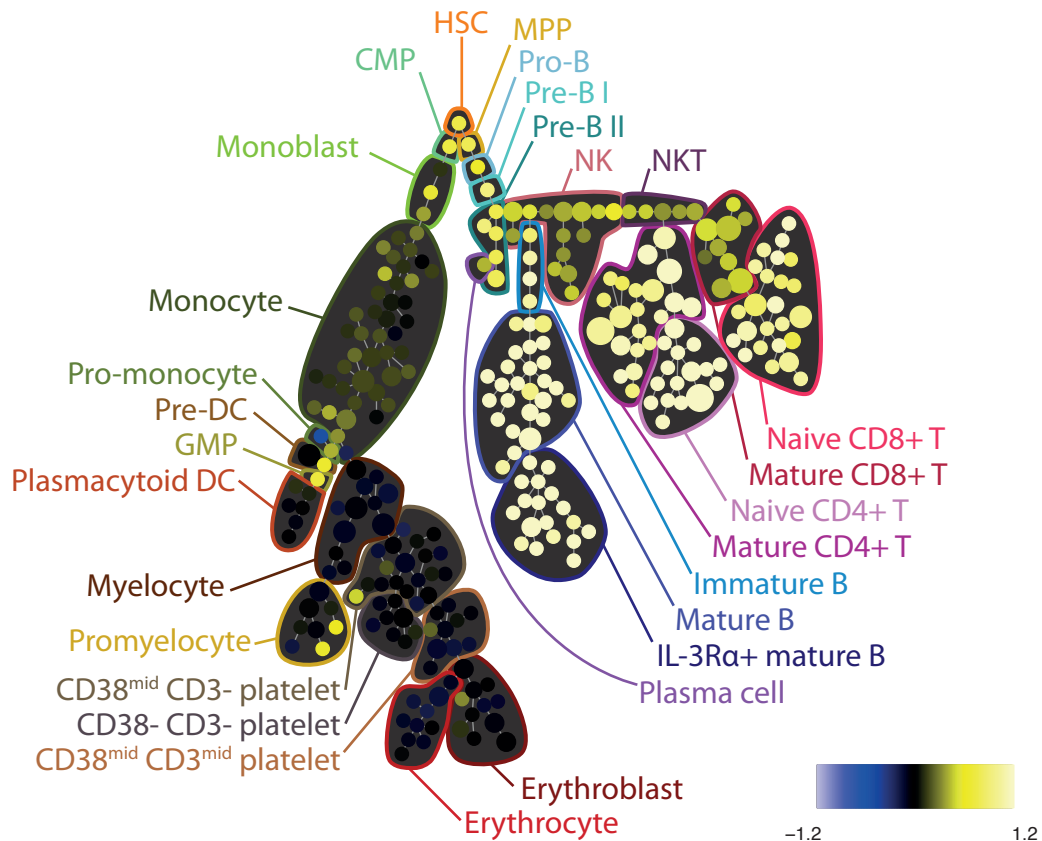

Figure S8B

176-pCREB — Dasatinib+PVO4 vs Ref Ratio

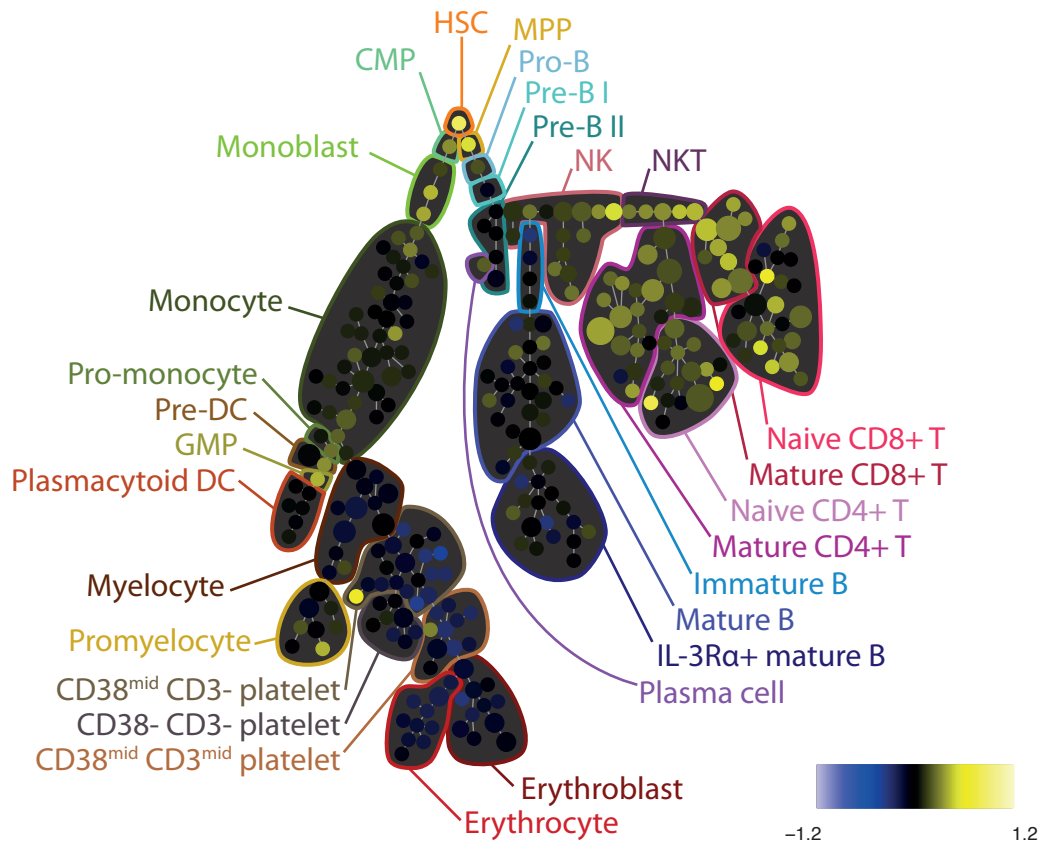

Figure S8B

176-pCREB ---- Dasatinib+Unstim vs Ref Ratio

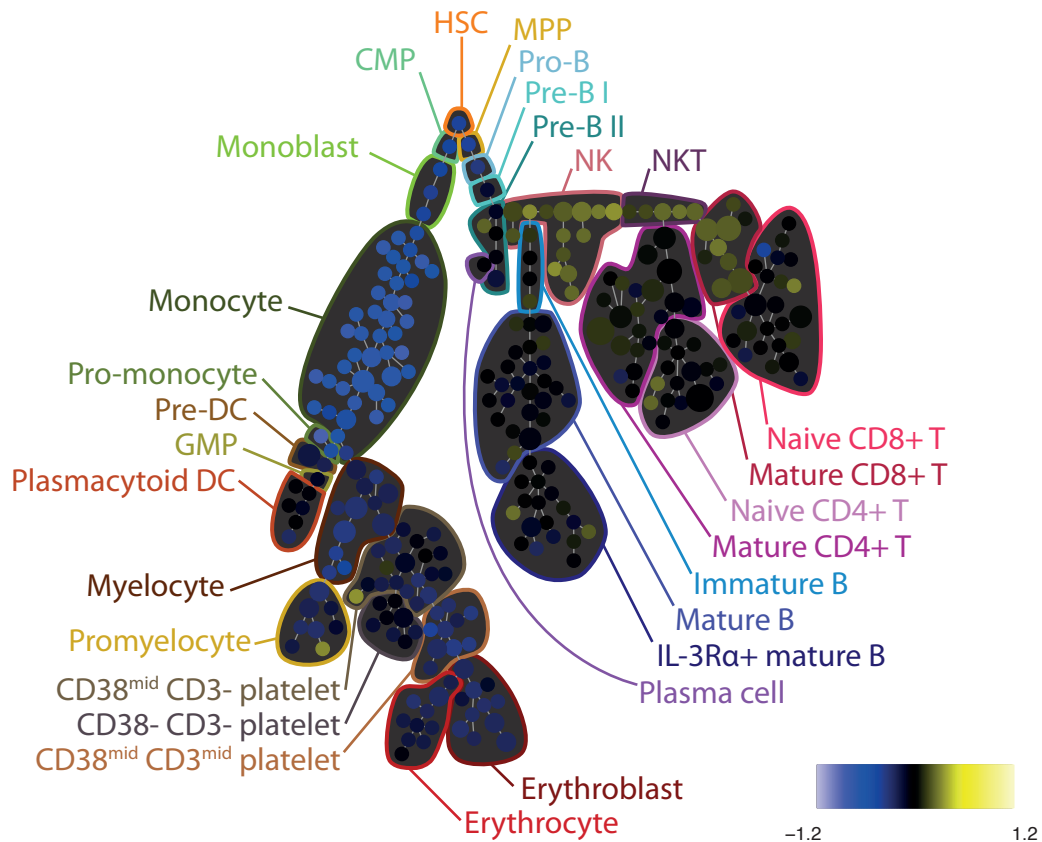



Figure S8C

141-pPLCgamma2 ---- JAKi+GCSF vs Ref Ratio

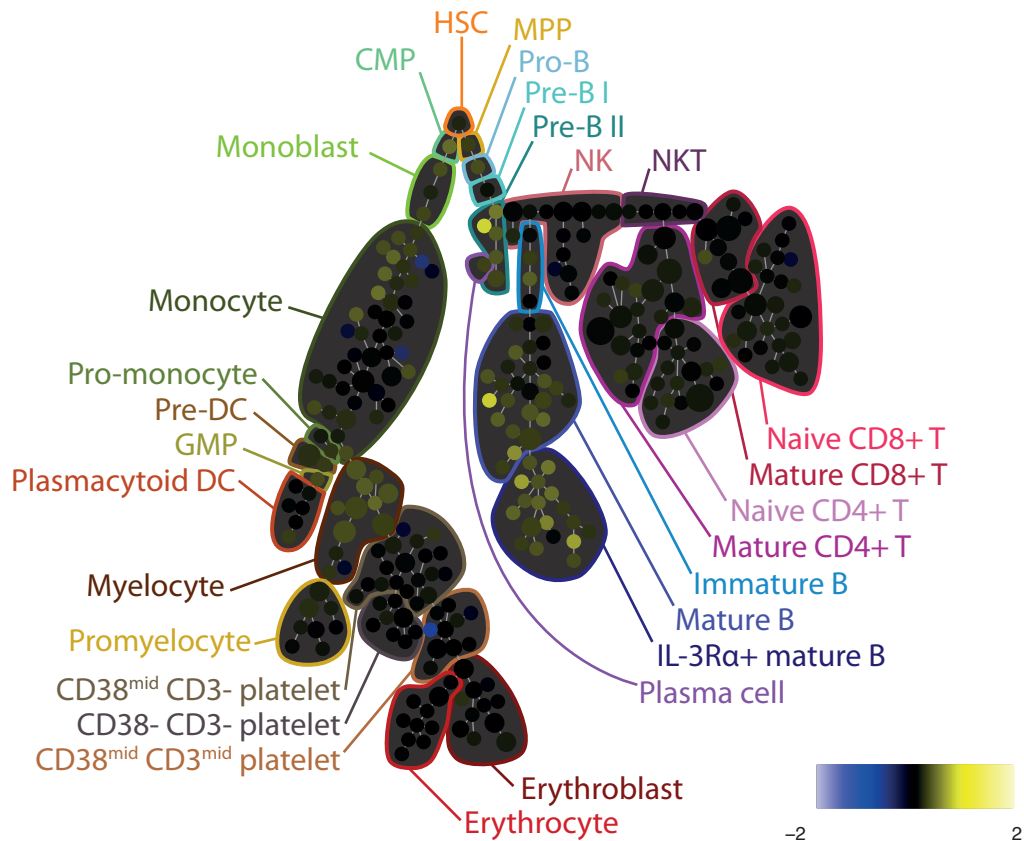

Figure S8C

141-pPLCgamma2 ---- JAKi+Unstim vs Ref Ratio

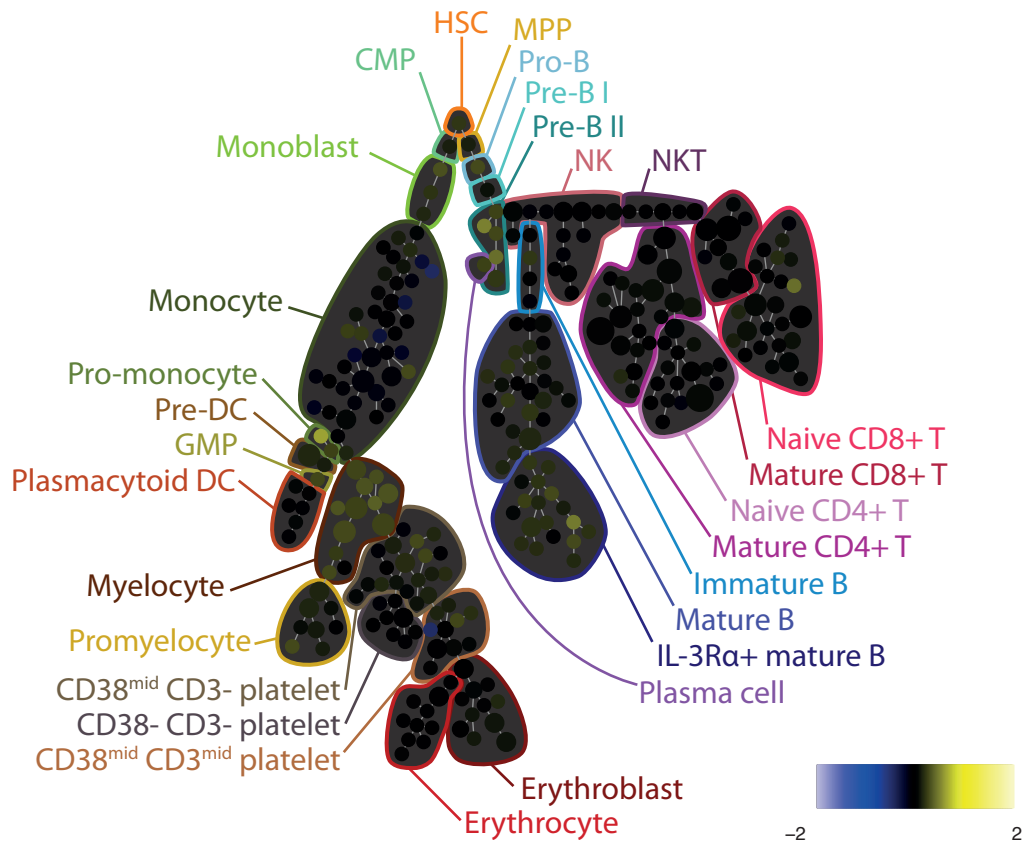

Figure S8C

150-pSTAT5 ---- JAKi+GCSF vs Ref Ratio

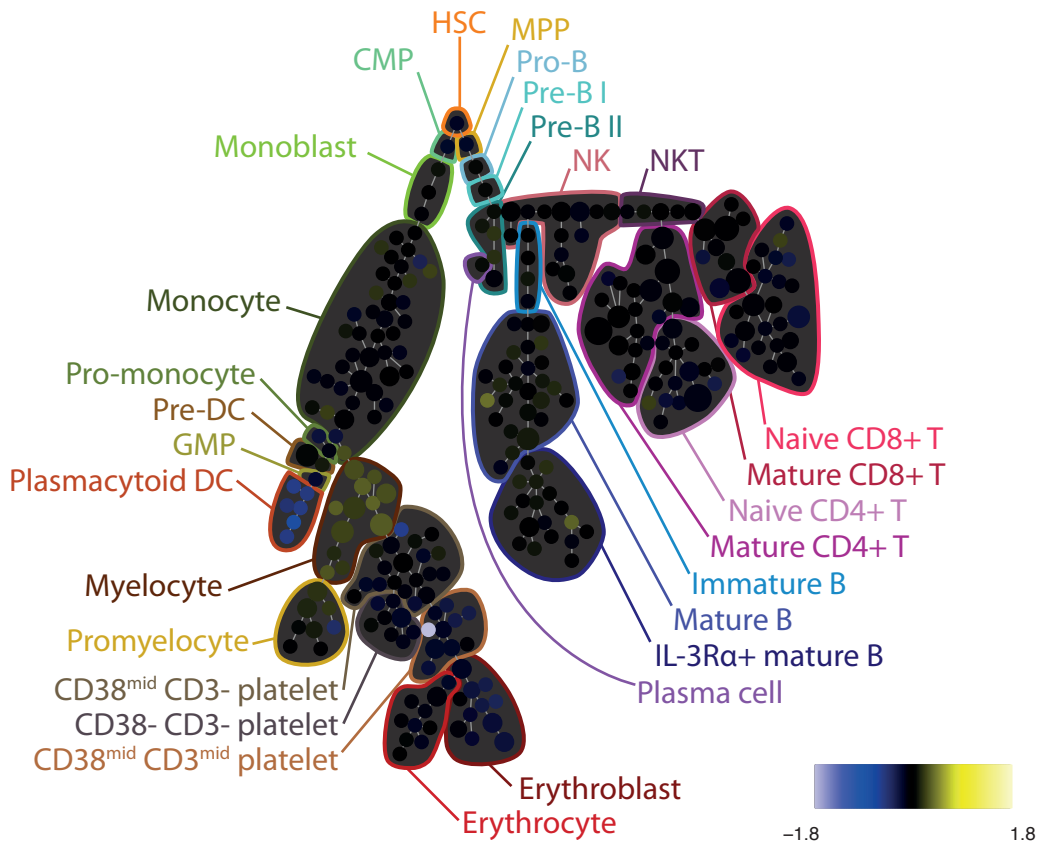

Figure S8C

150-pSTAT5 ---- JAKi+Unstim vs Ref Ratio

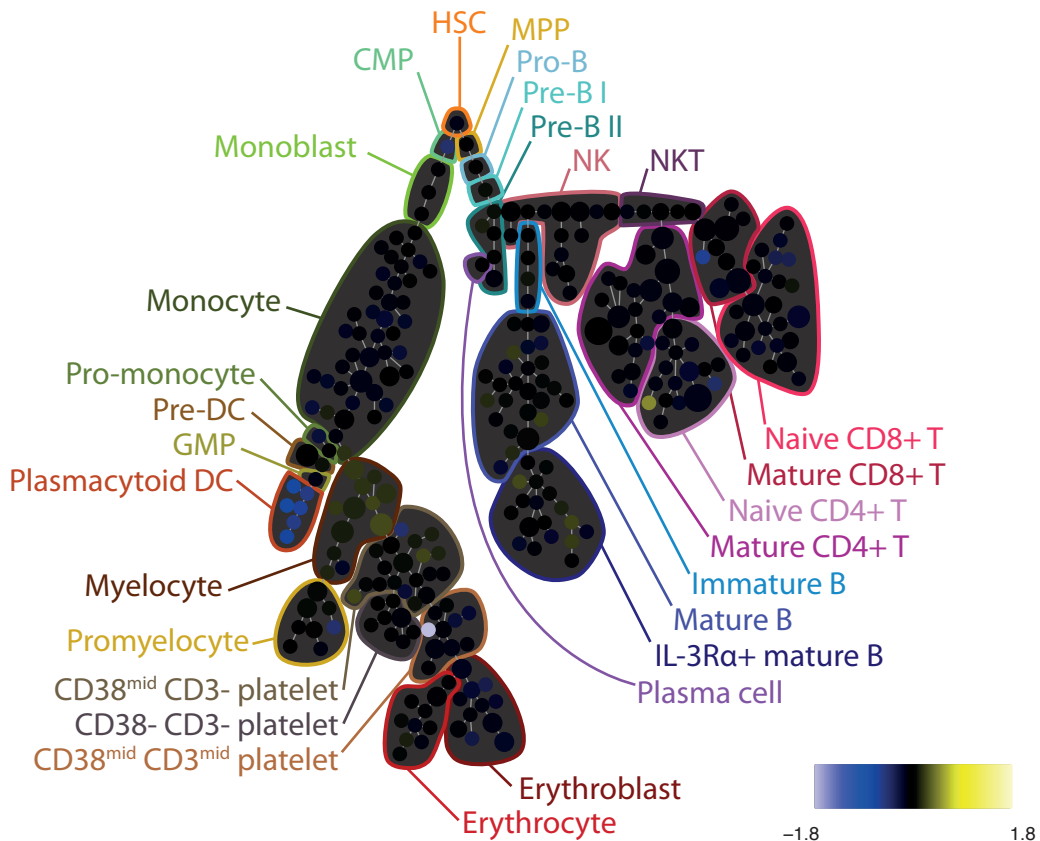

Figure S8C

151-pERK1/2 ---- JAKi+GCSF vs Ref Ratio

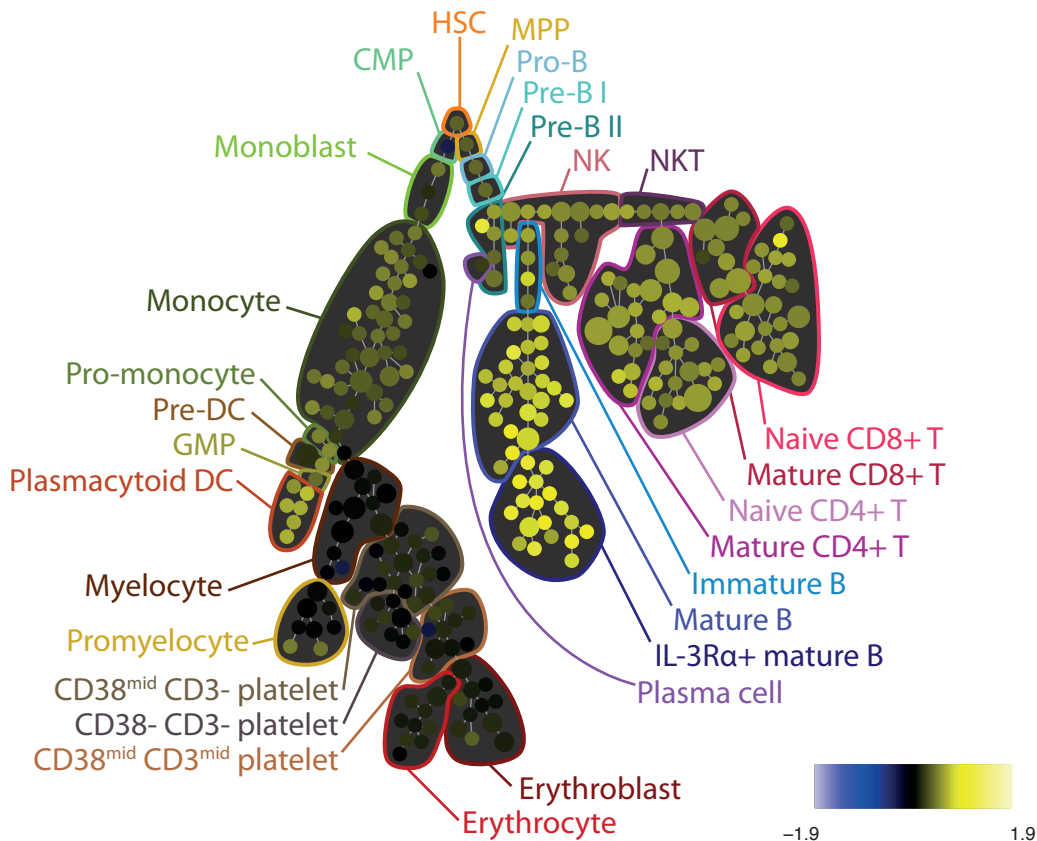

Figure S8C

151-pERK1/2 ---- JAKI+Unstim vs Ref Ratio

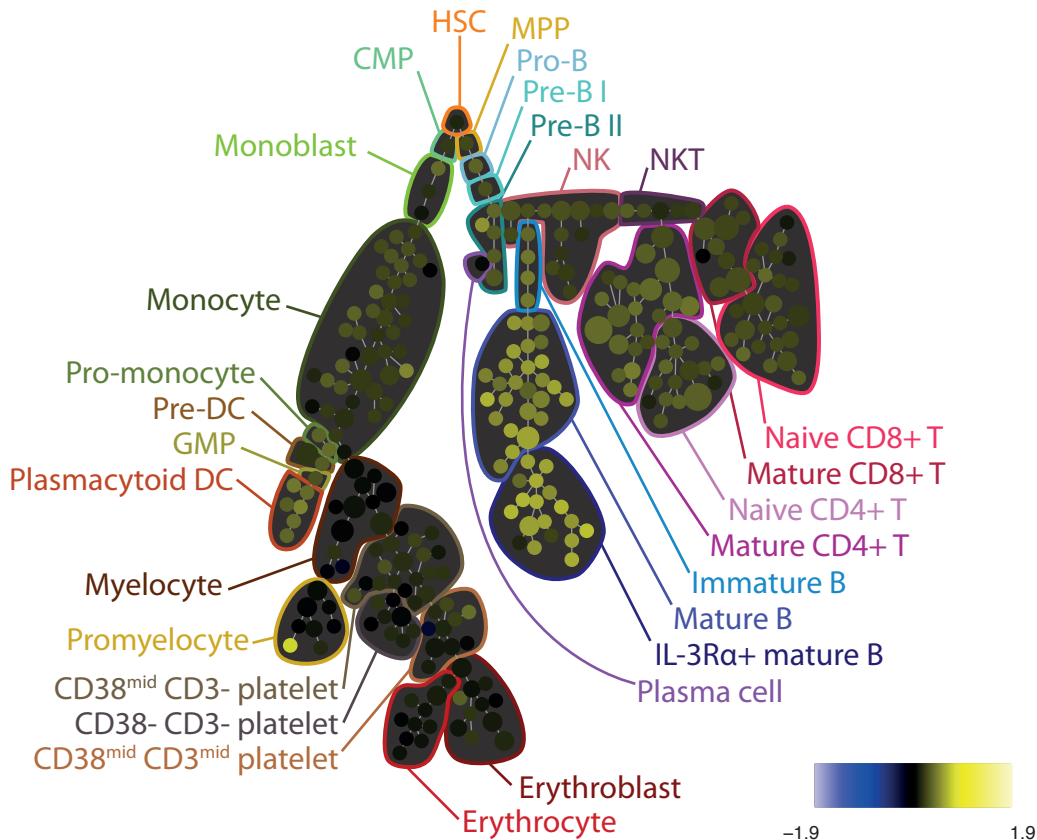

Figure S8C

152-Ki67 ---- JAKi+GCSF vs Ref Ratio

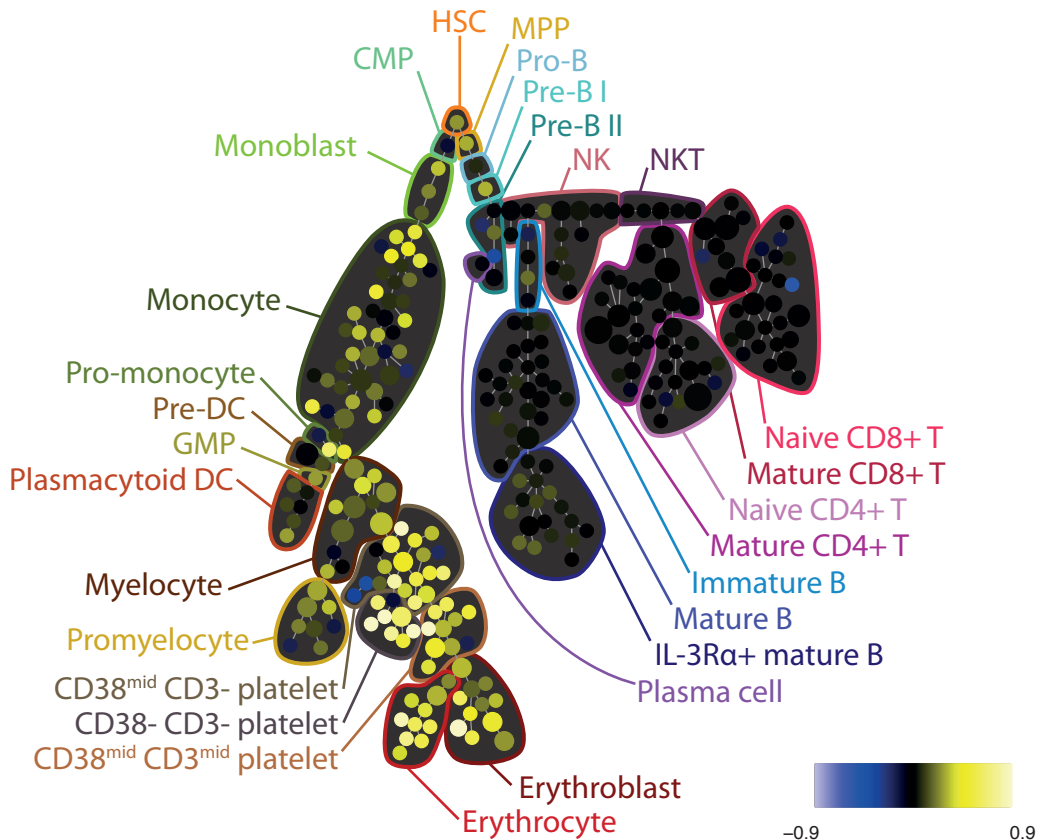

Figure S8C

152-Ki67 ---- JAKi+Unstim vs Ref Ratio

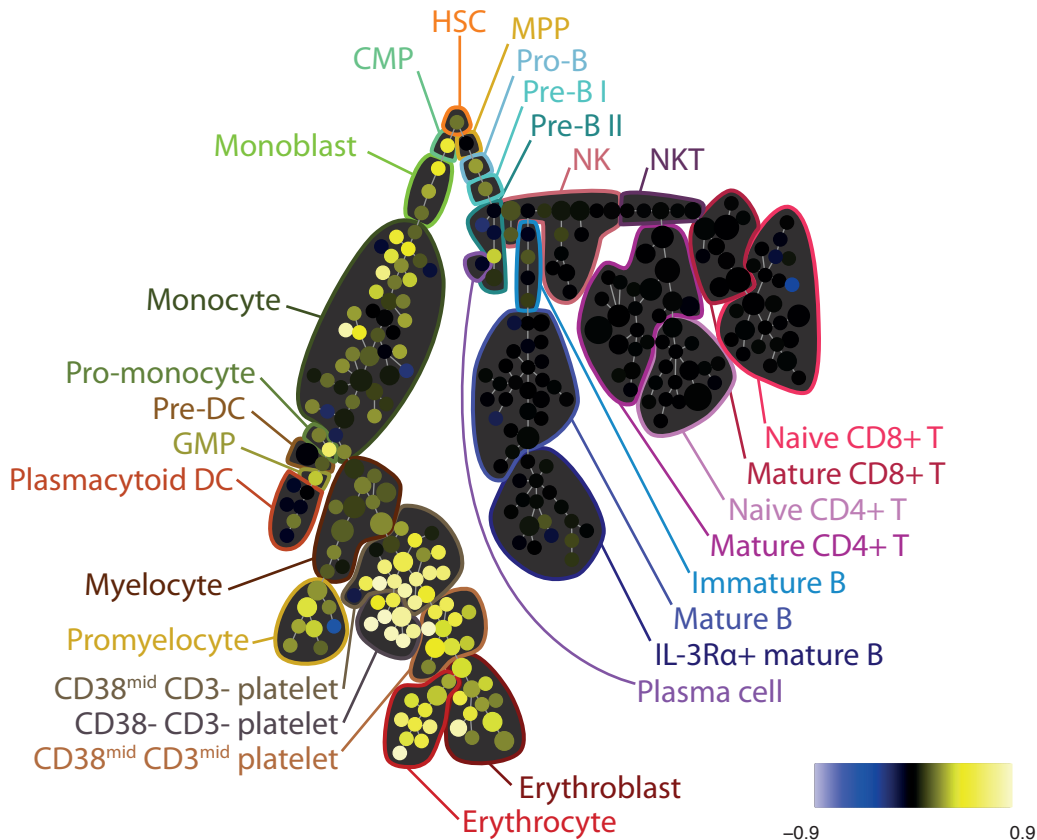



Figure S8C

153-pMAPKAPK2 ---- JAKi+GCSF vs Ref Ratio

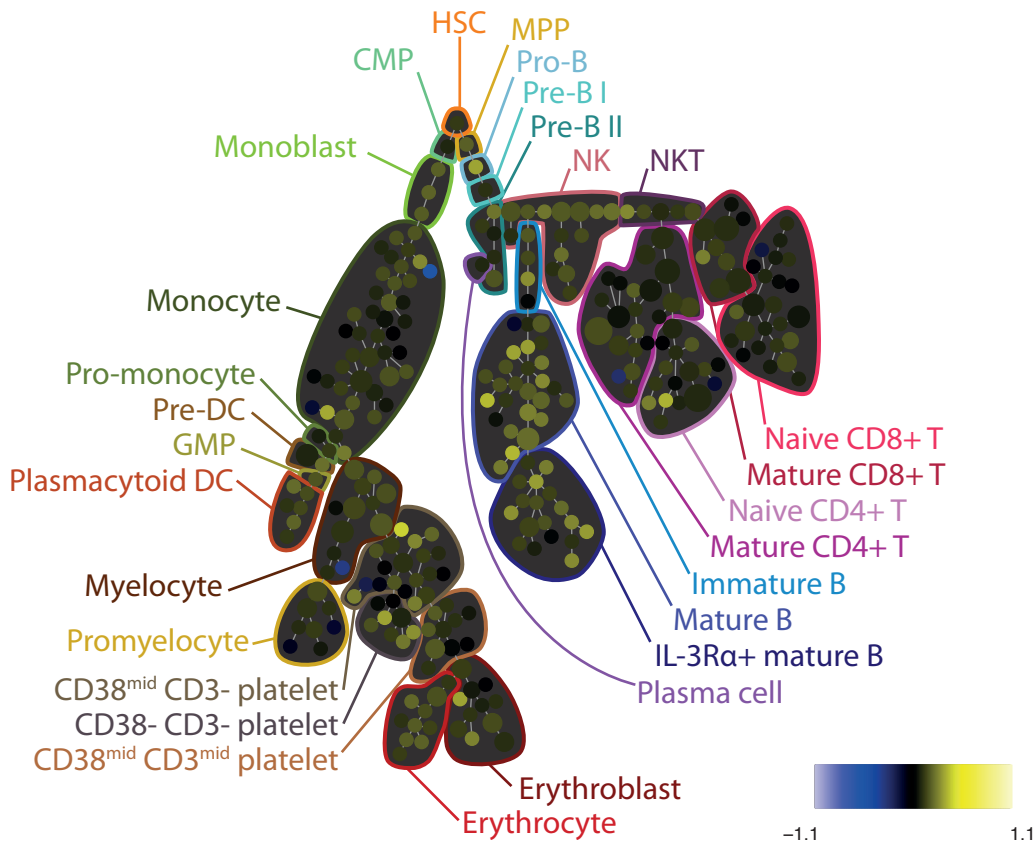

Figure S8C

153-pMAPKAPK2 ---- JAKi+Unstim vs Ref Ratio

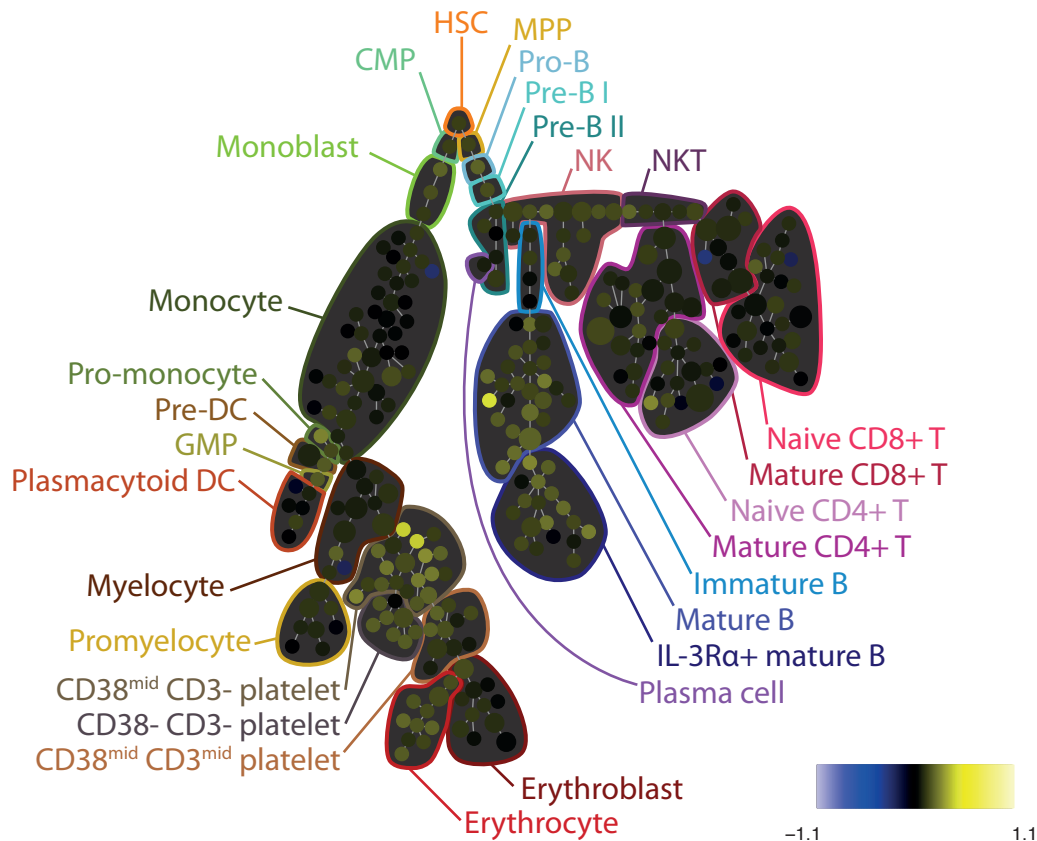

Figure S8C

154-pSHP2 ---- JAKi+GCSF vs Ref Ratio

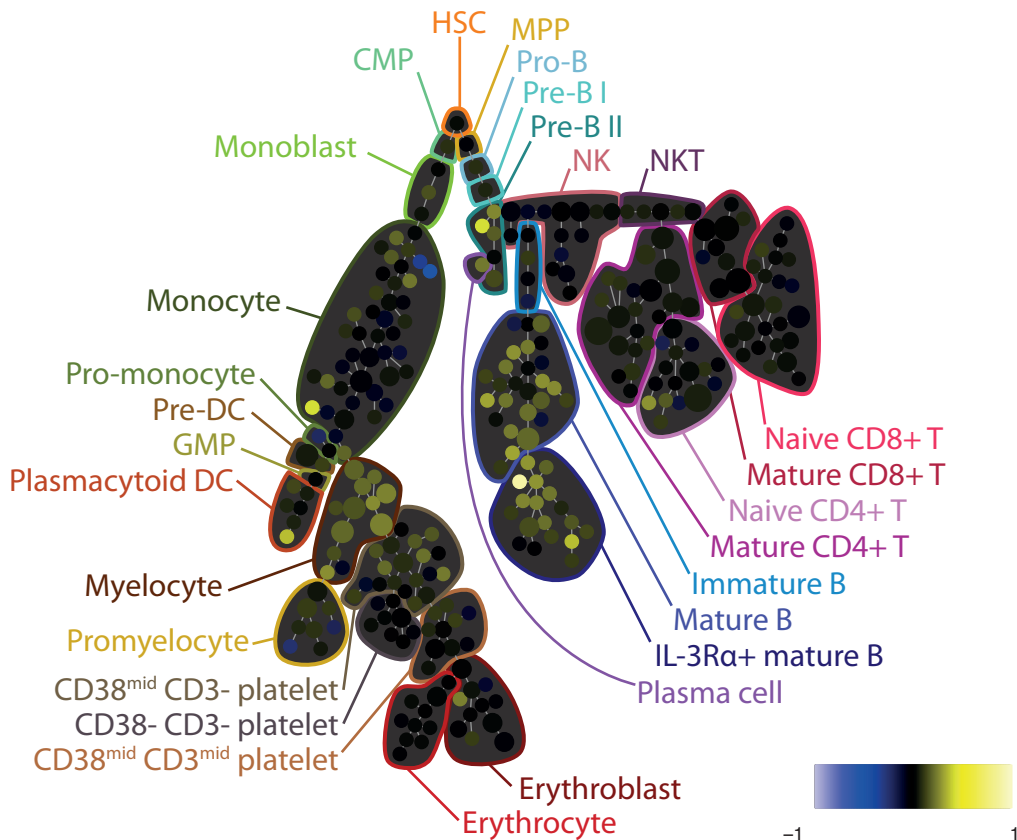

Figure S8C

154-pSHP2 ---- JAKi+Unstim vs Ref Ratio

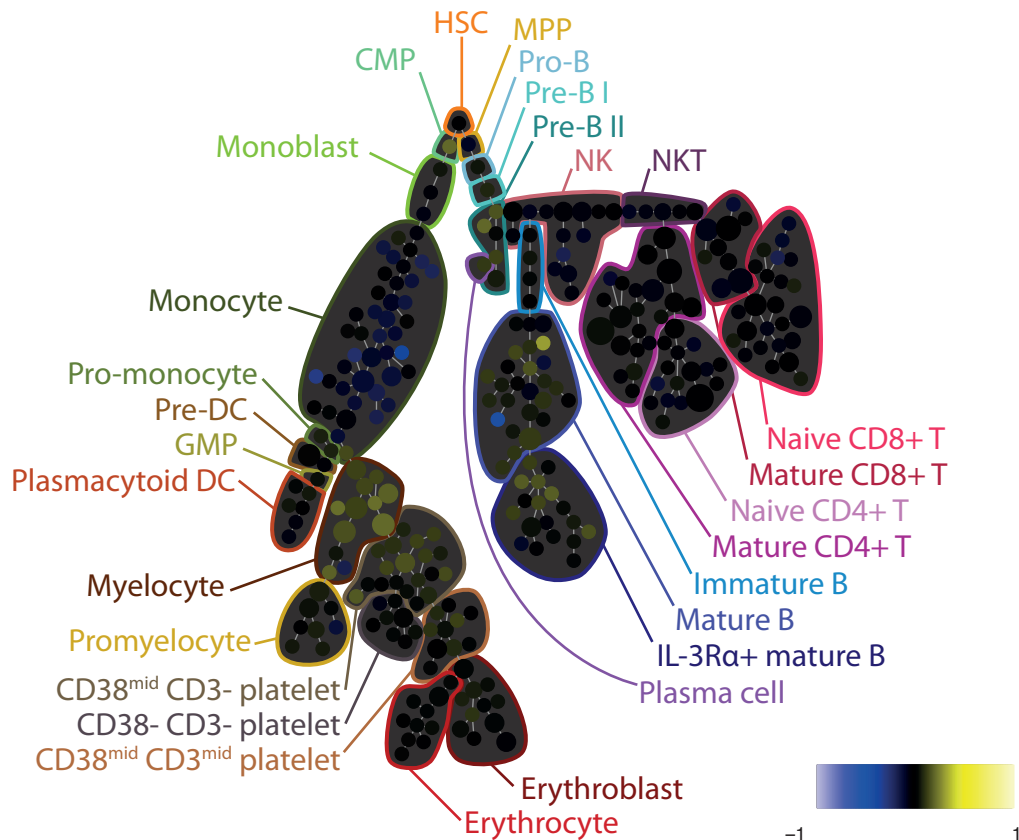

Figure S8C

156-pZAP70/Syk ---- JAKi+GCSF vs Ref Ratio

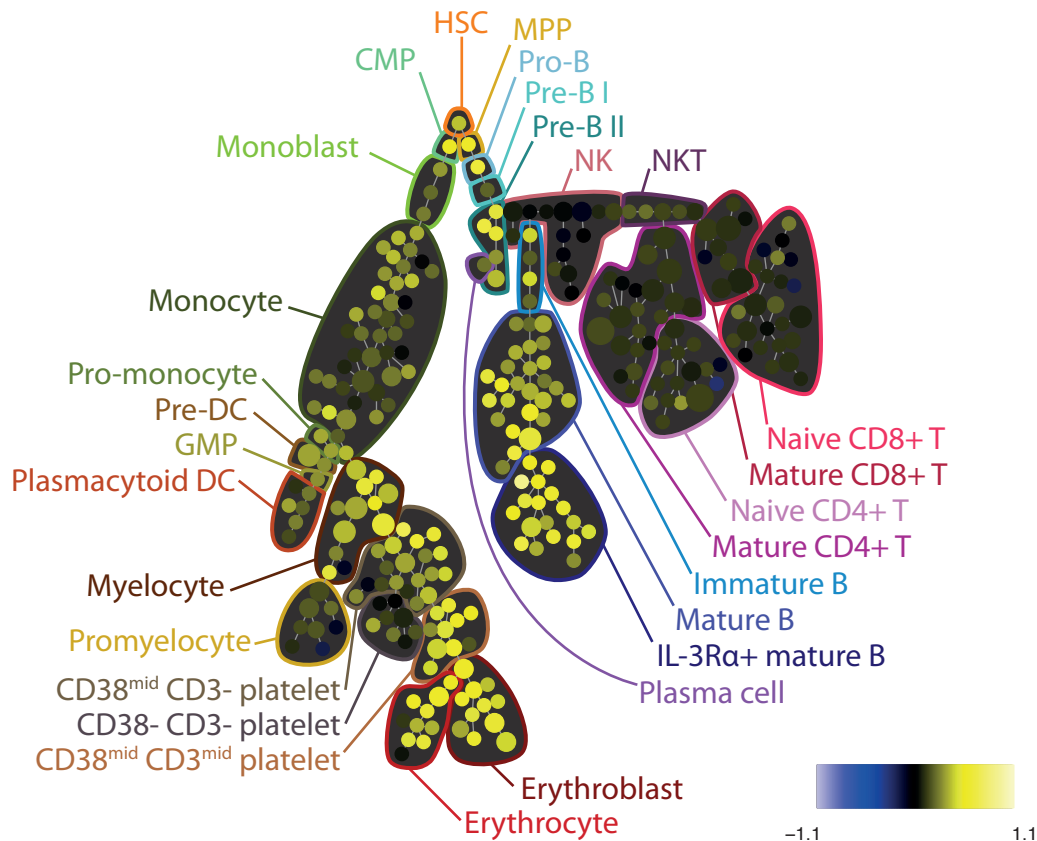

Figure S8C

156-pZAP70/Syk ---- JAKi+Unstim vs Ref Ratio

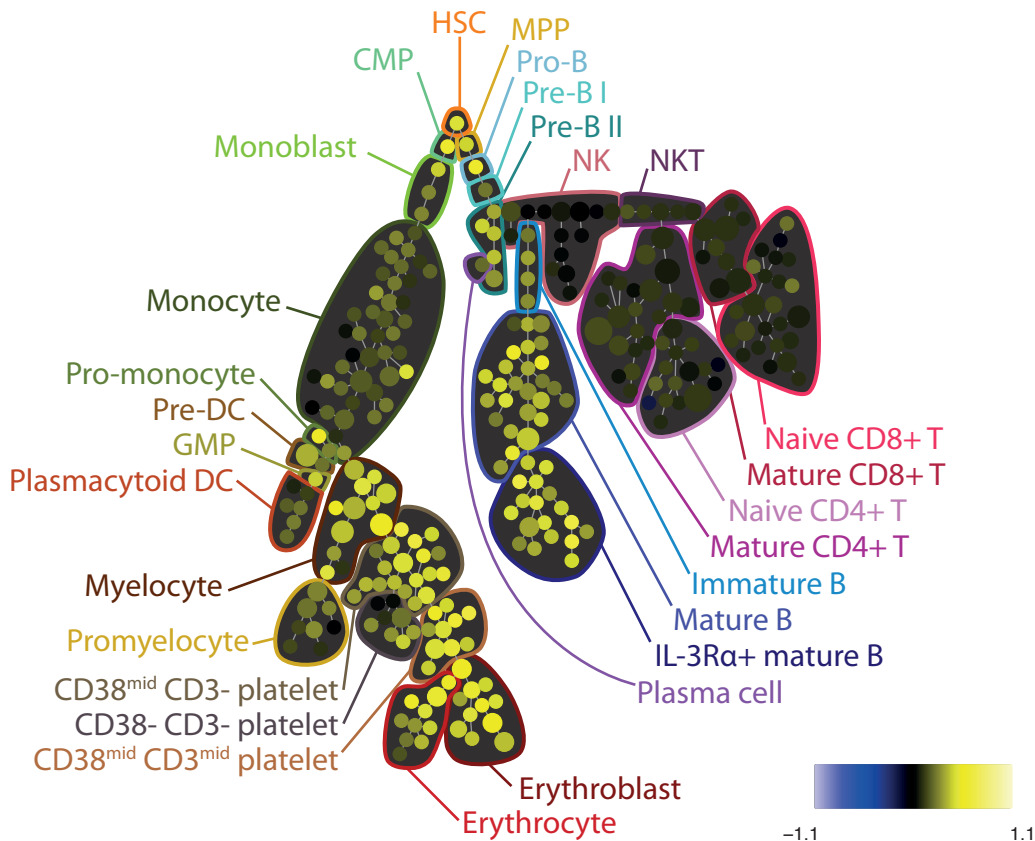

Figure S8C

159-pSTAT3 ---- JAKi+GCSF vs Ref Ratio

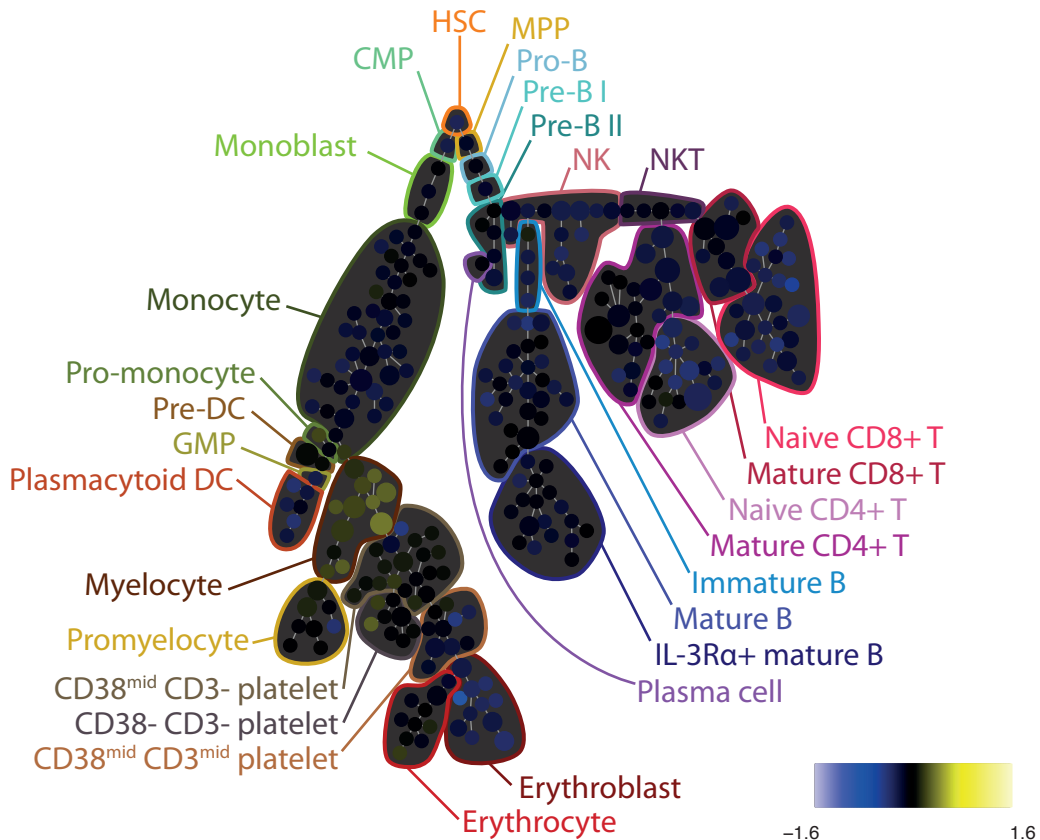

Figure S8C

159-pSTAT3 ---- JAKi+Unstim vs Ref Ratio

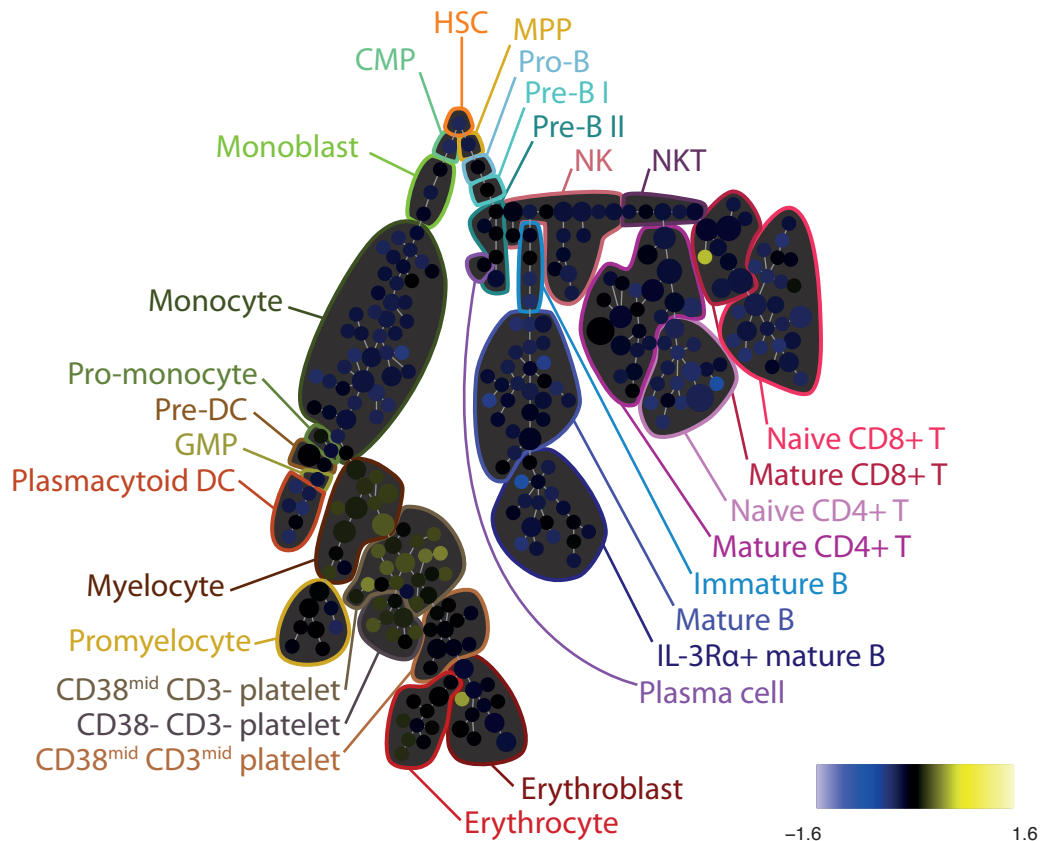



Figure S8C

164-pSLP-76 ---- JAKi+GCSF vs Ref Ratio

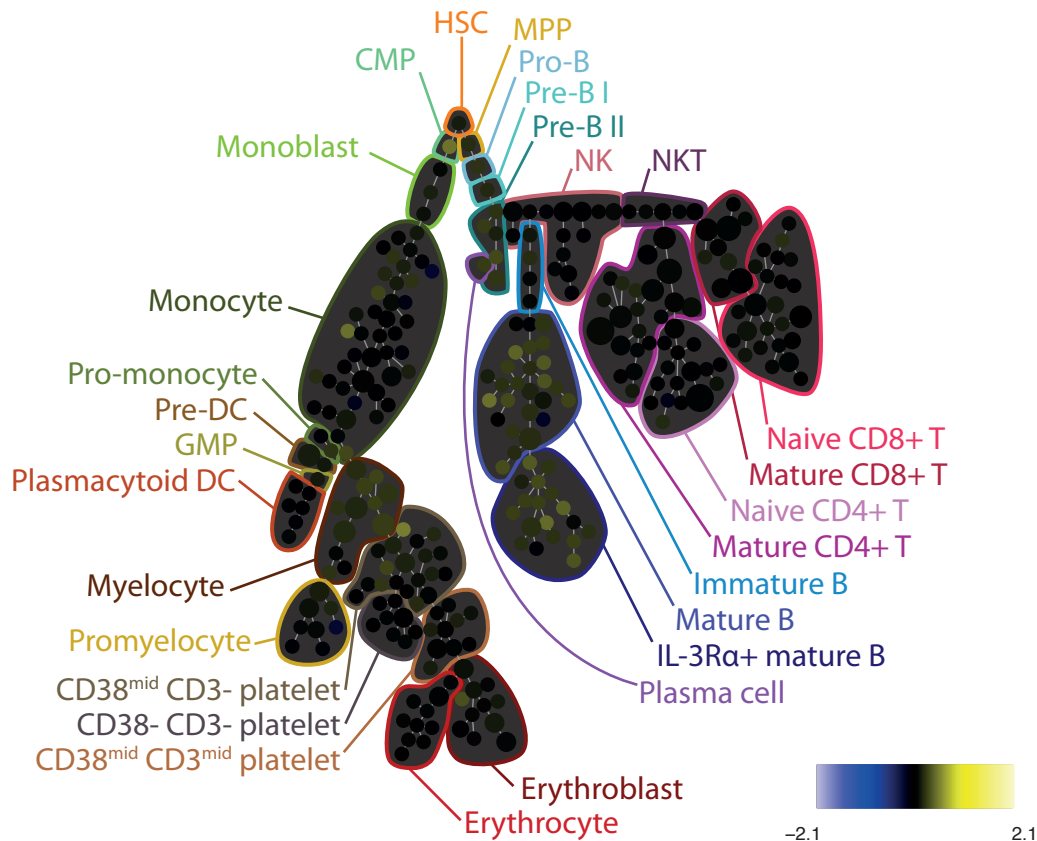

Figure S8C

164-pSLP-76 ---- JAKi+Unstim vs Ref Ratio

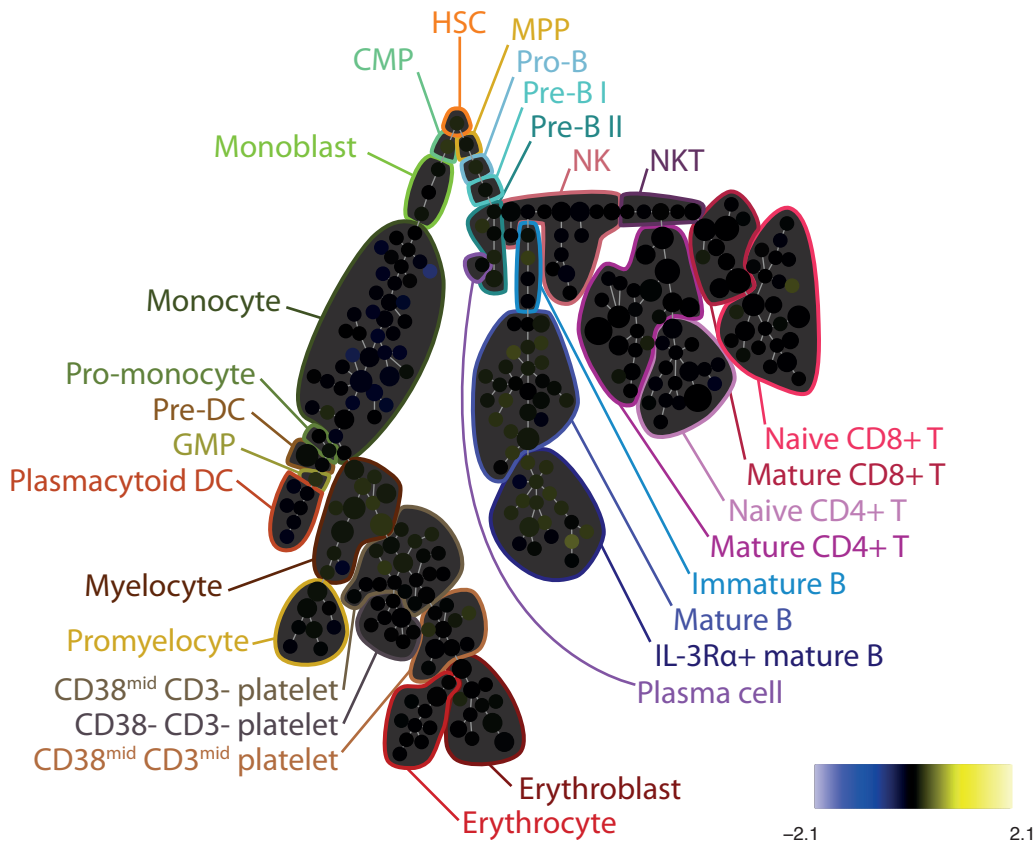

Figure S8C

165-pNFkB ---- JAKi+GCSF vs Ref Ratio

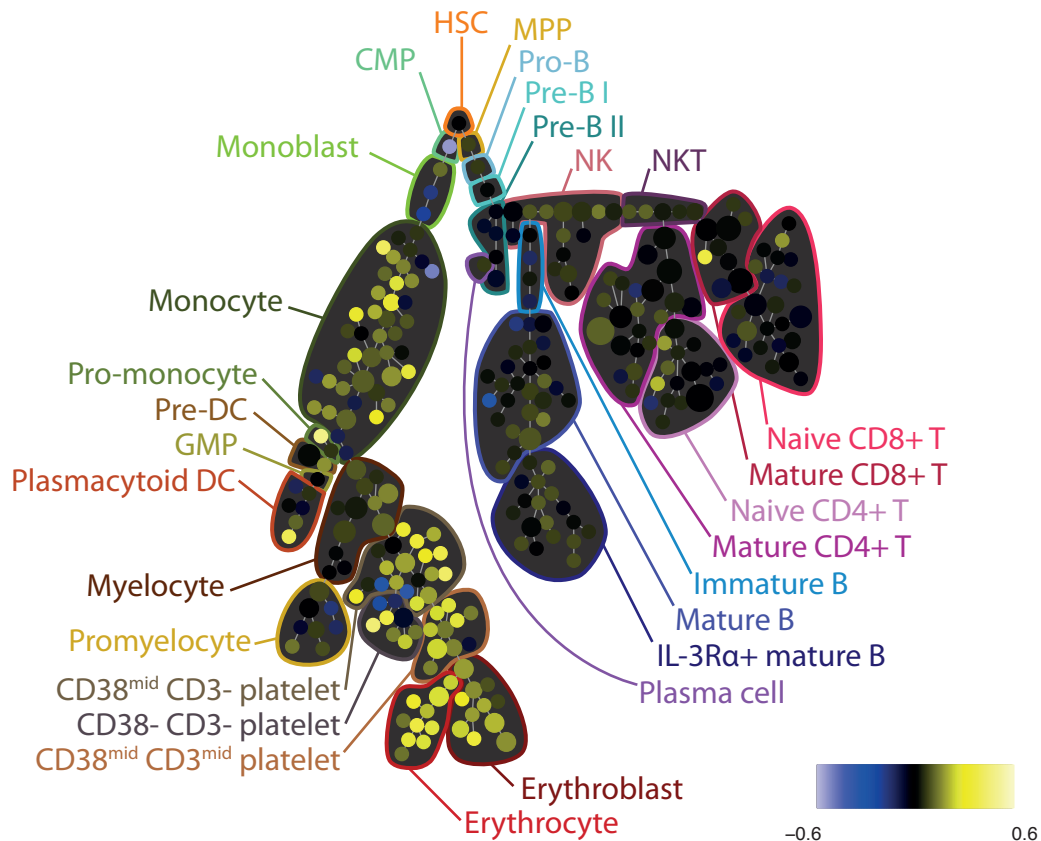

Figure S8C

165-pNFkB ---- JAKi+Unstim vs Ref Ratio

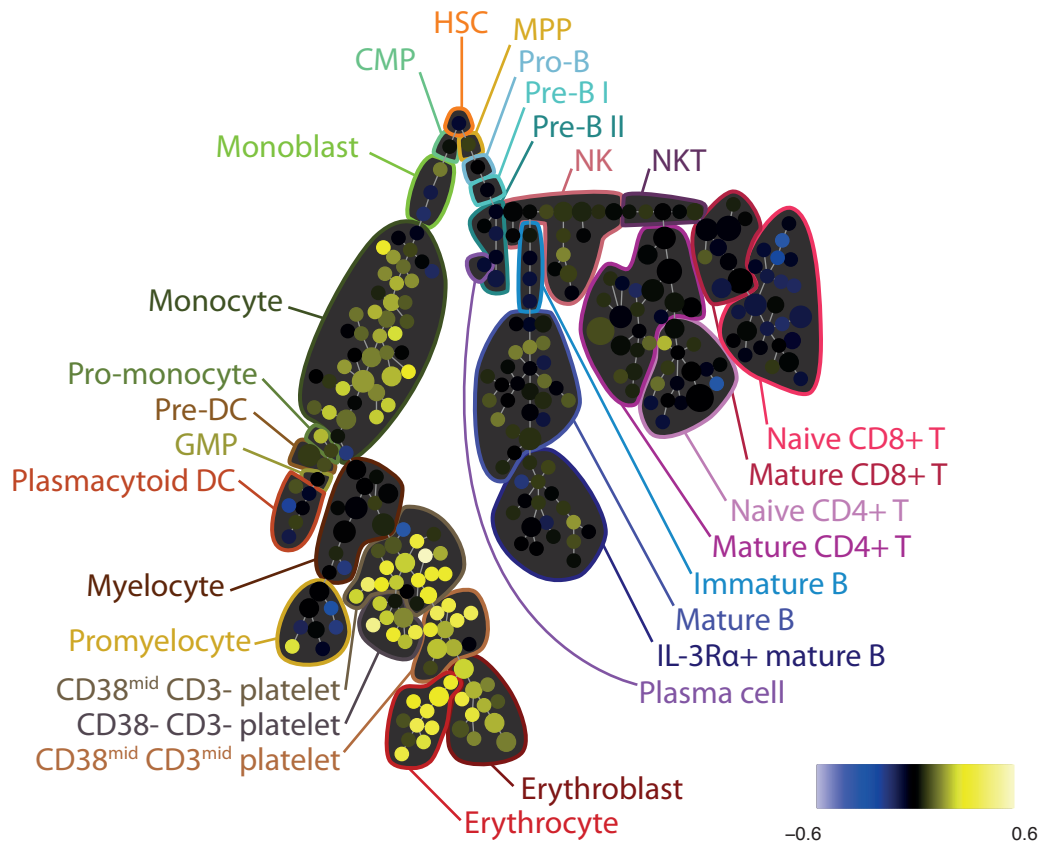

Figure S8C

166-IkBalpha ---- JAKi+GCSF vs Ref Ratio

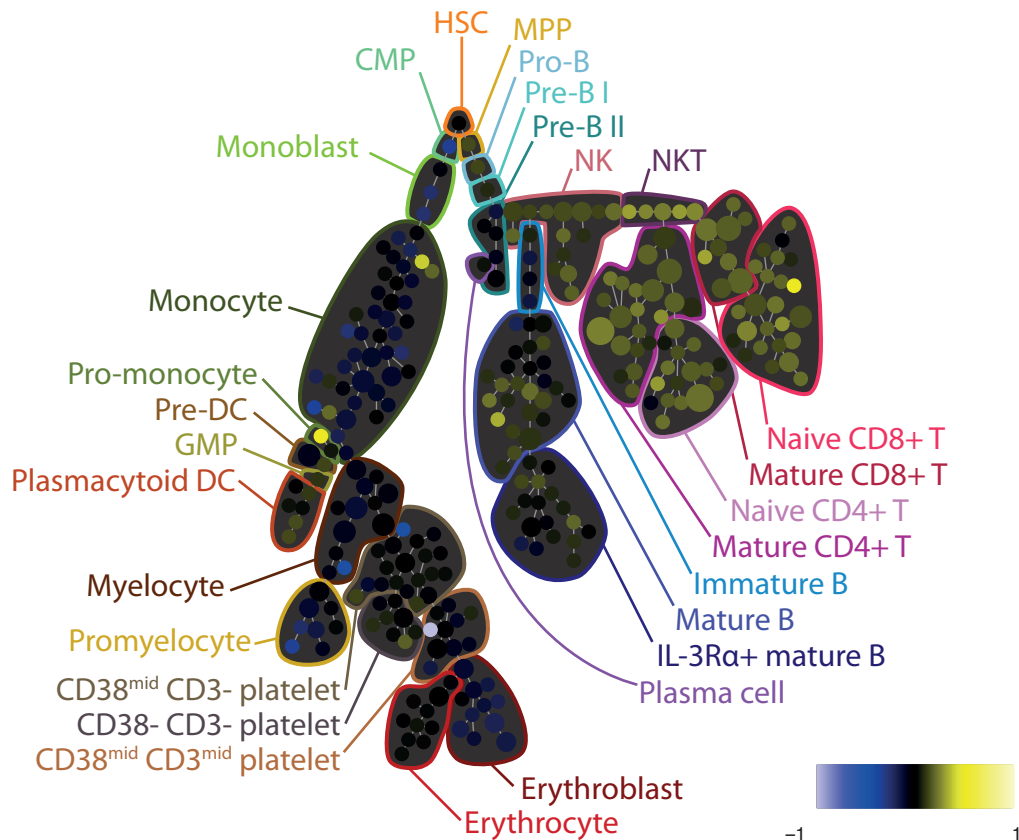

Figure S8C

166-IkBalpna ---- JAKi+Unstim vs Ref Ratio

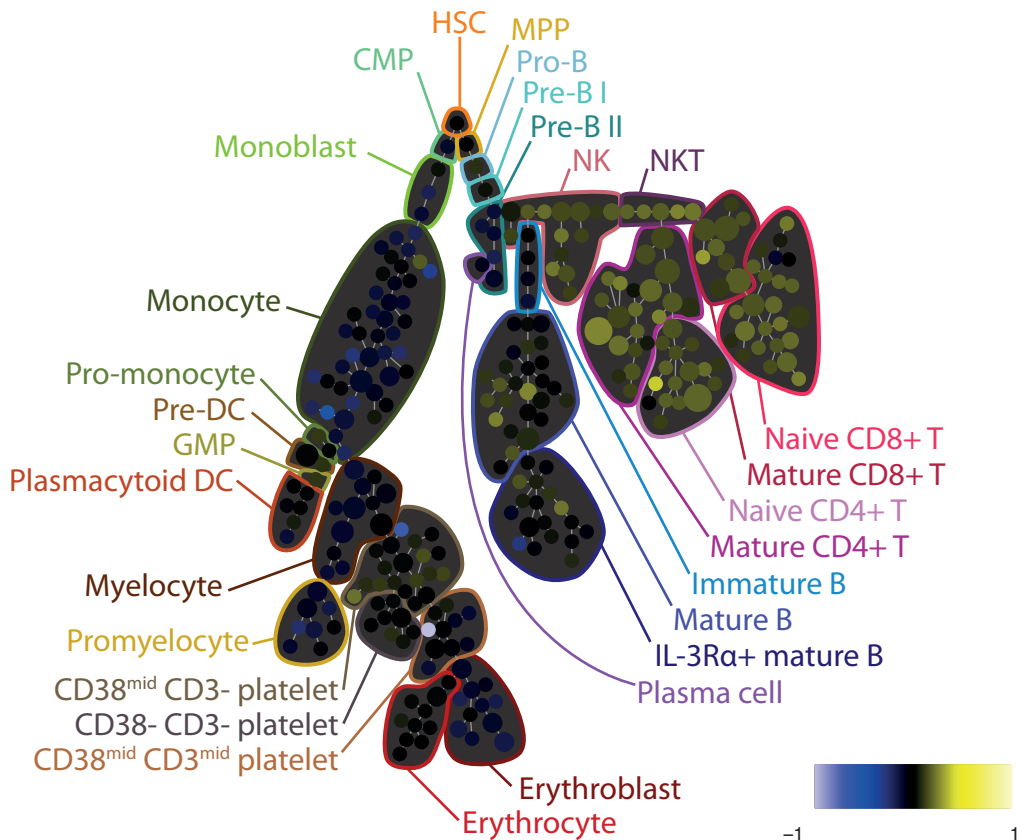

Figure S8C

168-pH3 ---- JAKi+GCSF vs Ref Ratio

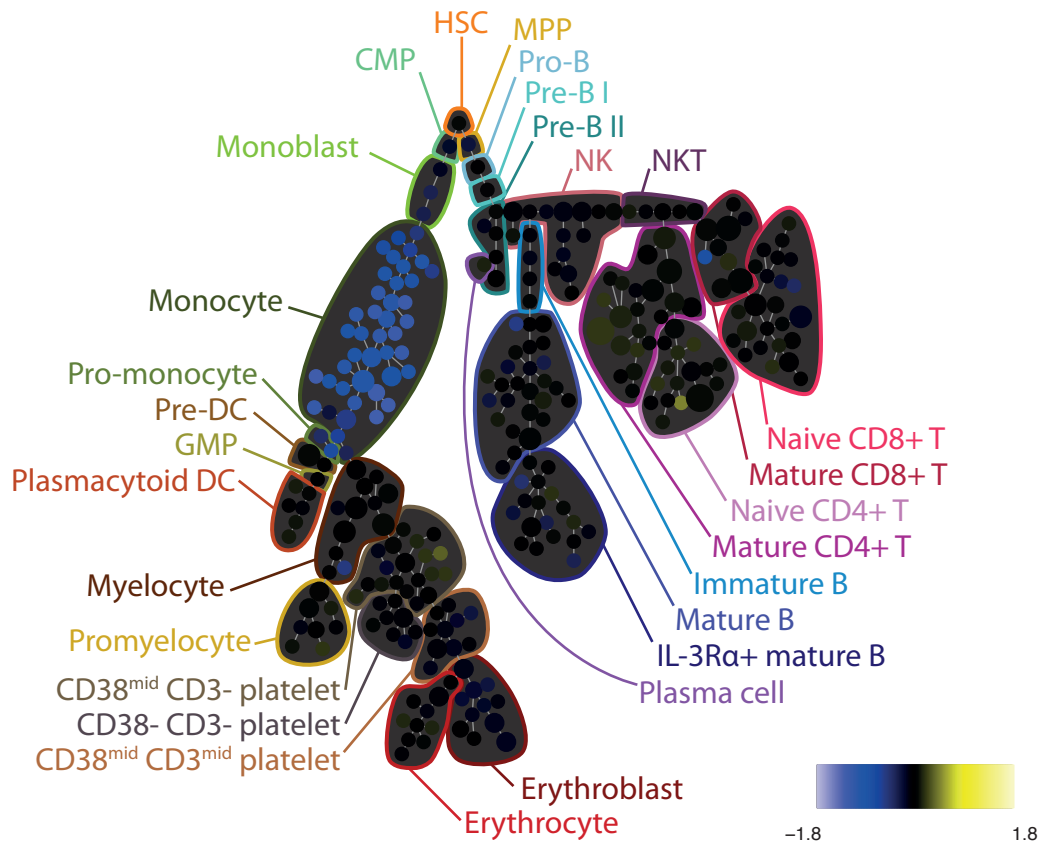

Figure S8C

168-pH3 ---- JAKi+Unstim vs Ref Ratio

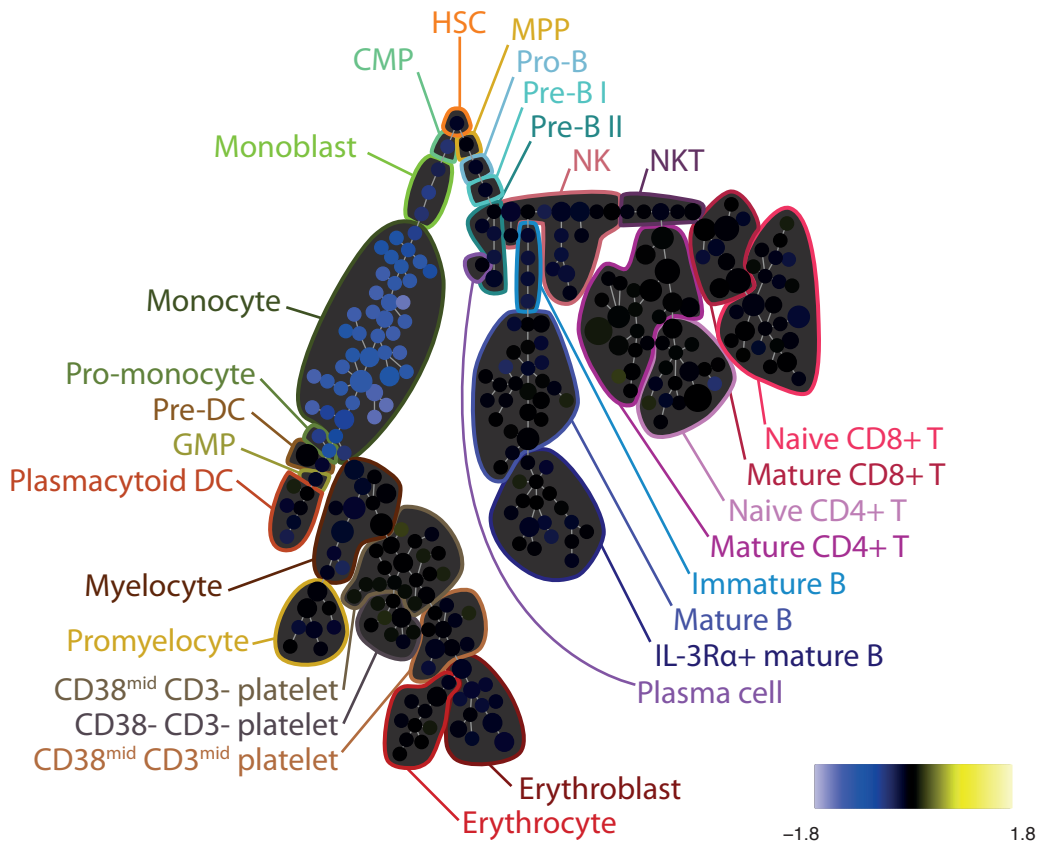



Figure S8C

169-pP38 ---- JAKi+GCSF vs Ref Ratio

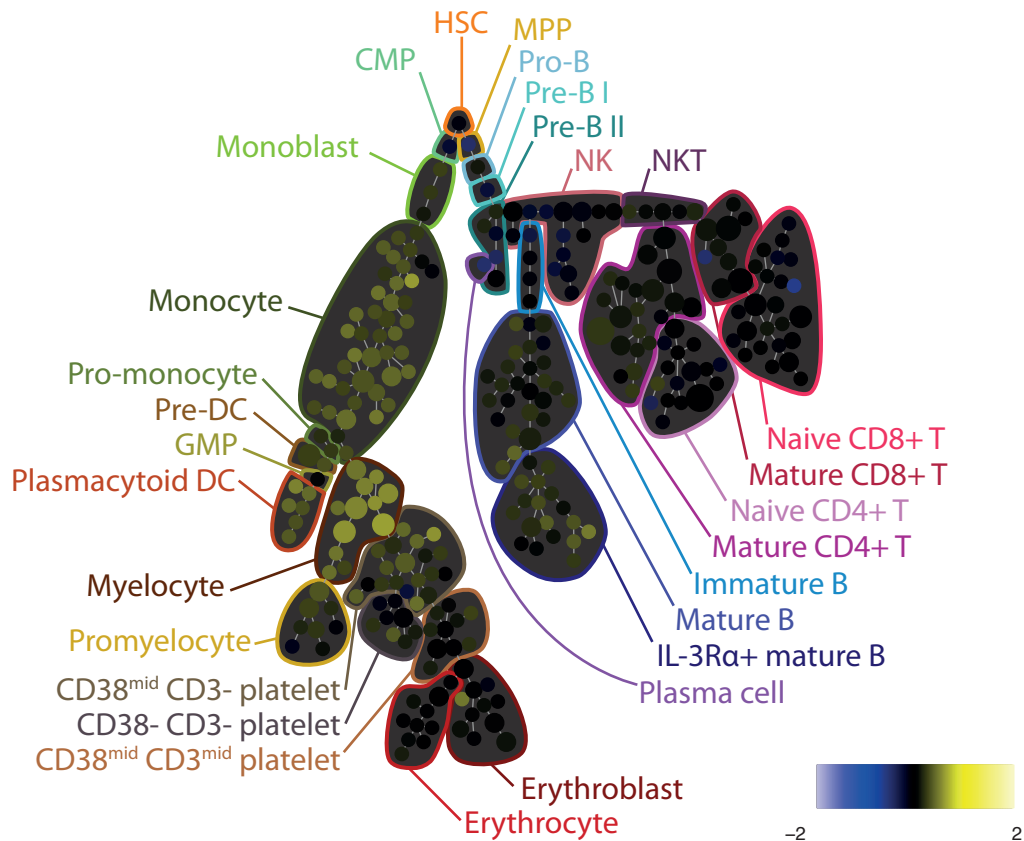

Figure S8C

169-pP38 ---- JAKi+Unstim vs Ref Ratio

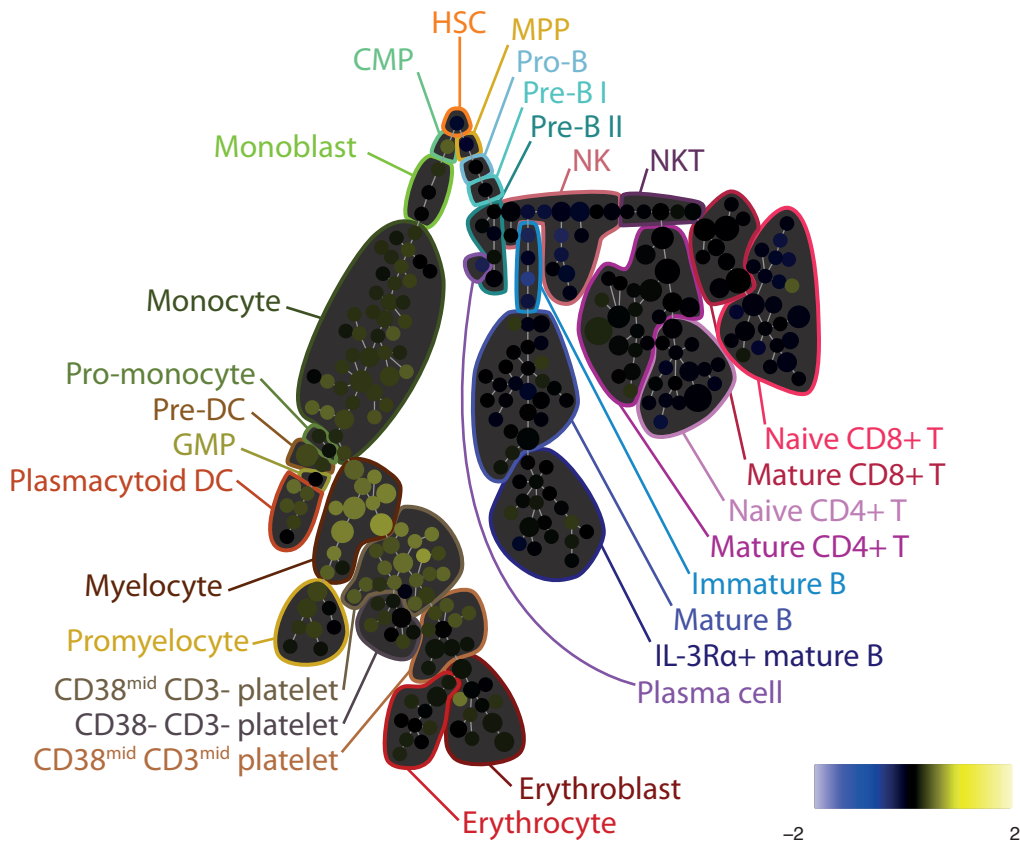

Figure S8C

171-pBtk/Itk ---- JAKi+GCSF vs Ref Ratio

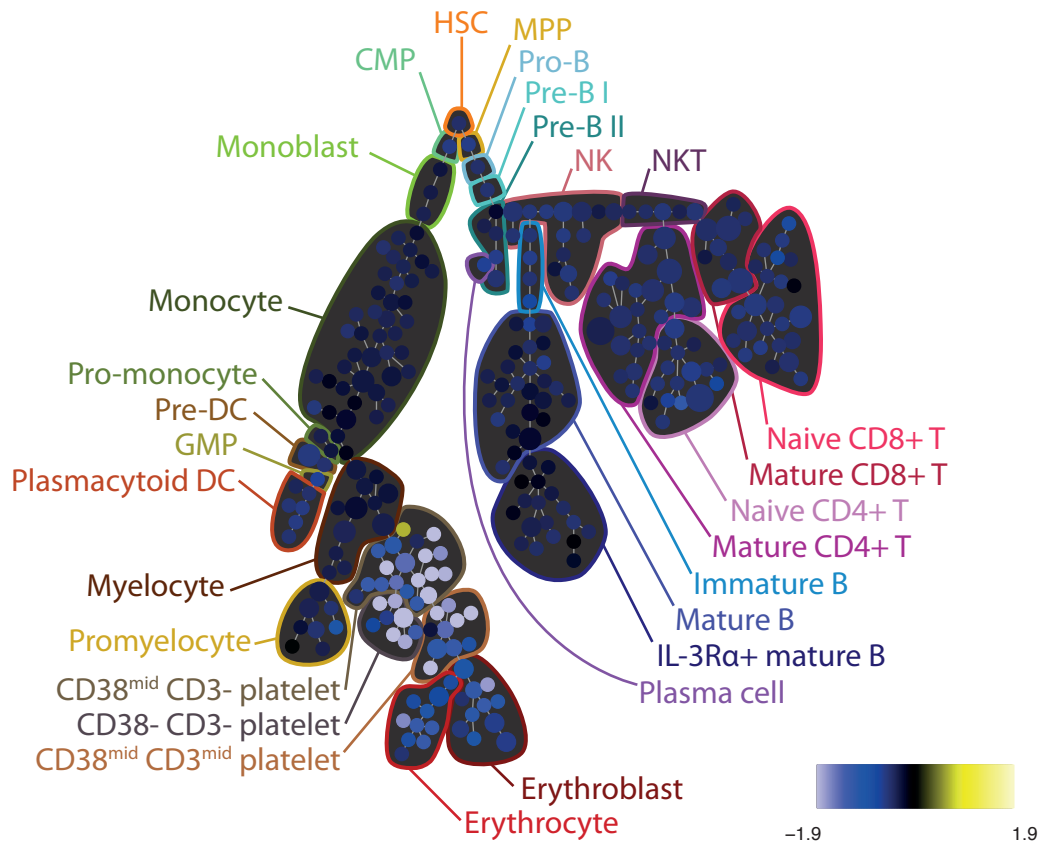

Figure S8C

171-pBtk/ltk ---- JAKi+Unstim vs Ref Ratio

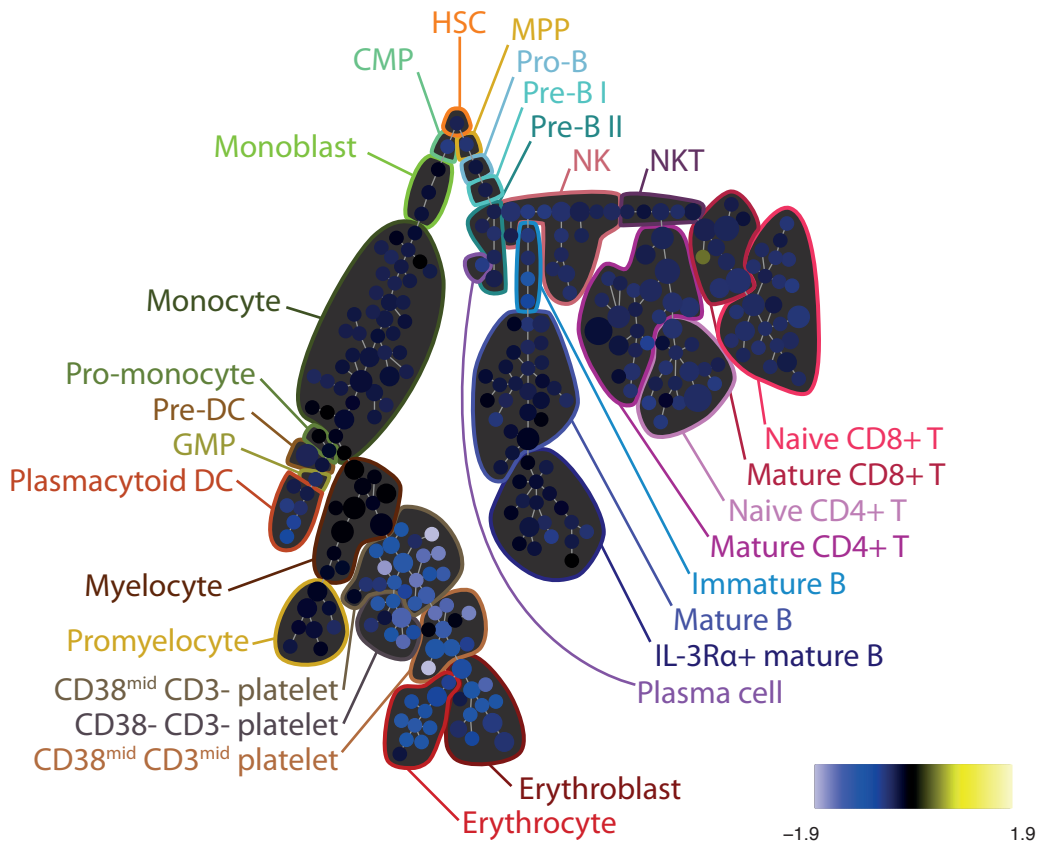

Figure S8C

172-pS6 ---- JAKi+GCSF vs Ref Ratio

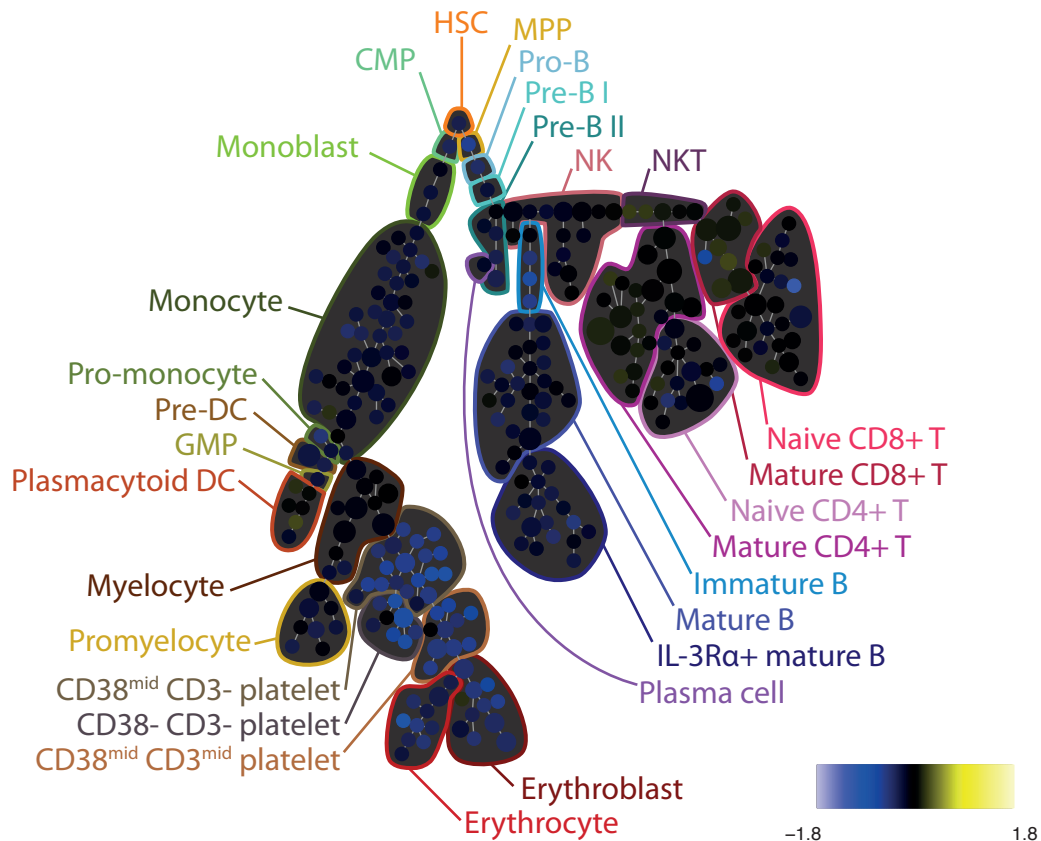

Figure S8C

172-pS6 ---- JAKi+Unstim vs Ref Ratio

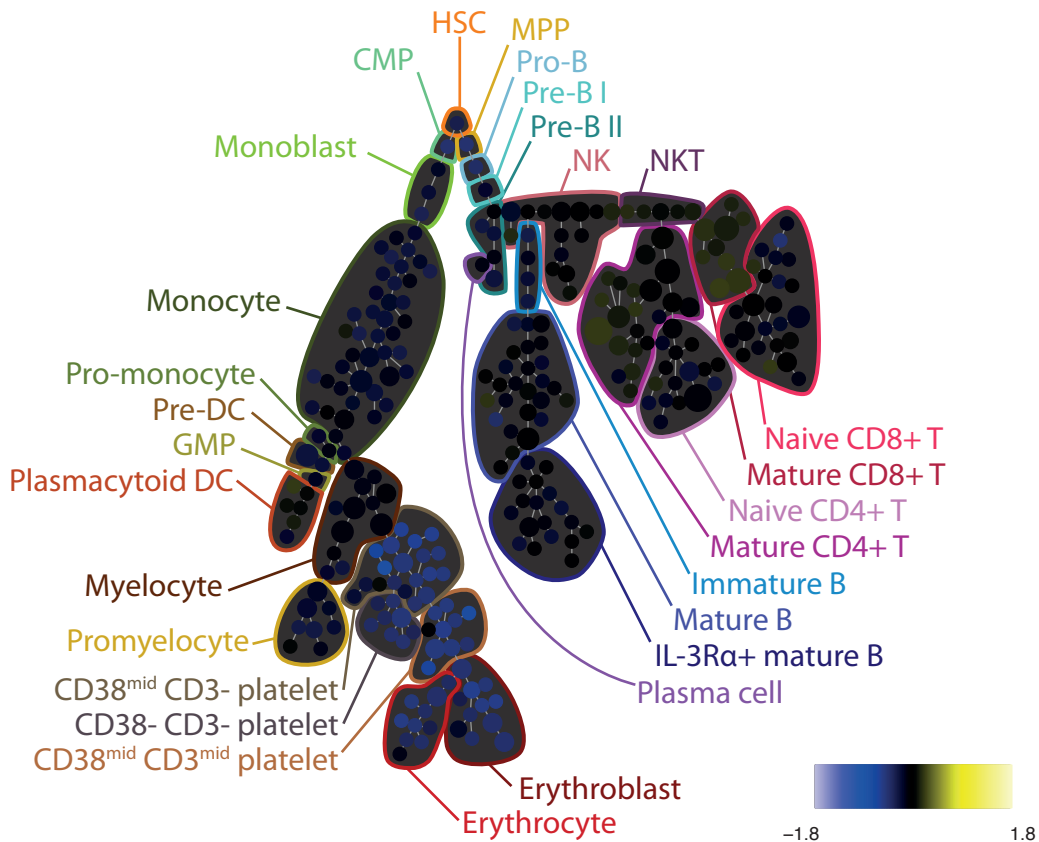

Figure S8C

174-pSrcFK ---- JAKi+GCSF vs Ref Ratio

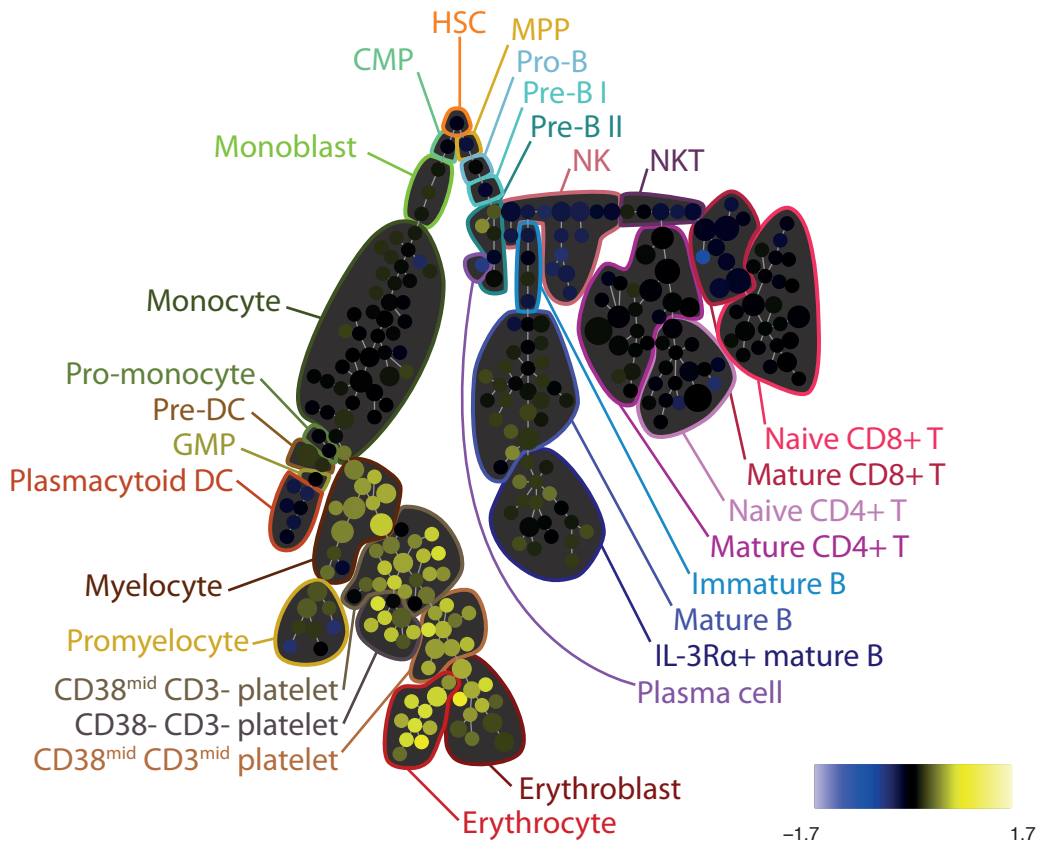

Figure S8C

174-pSrcFK ---- JAKi+Unstim vs Ref Ratio

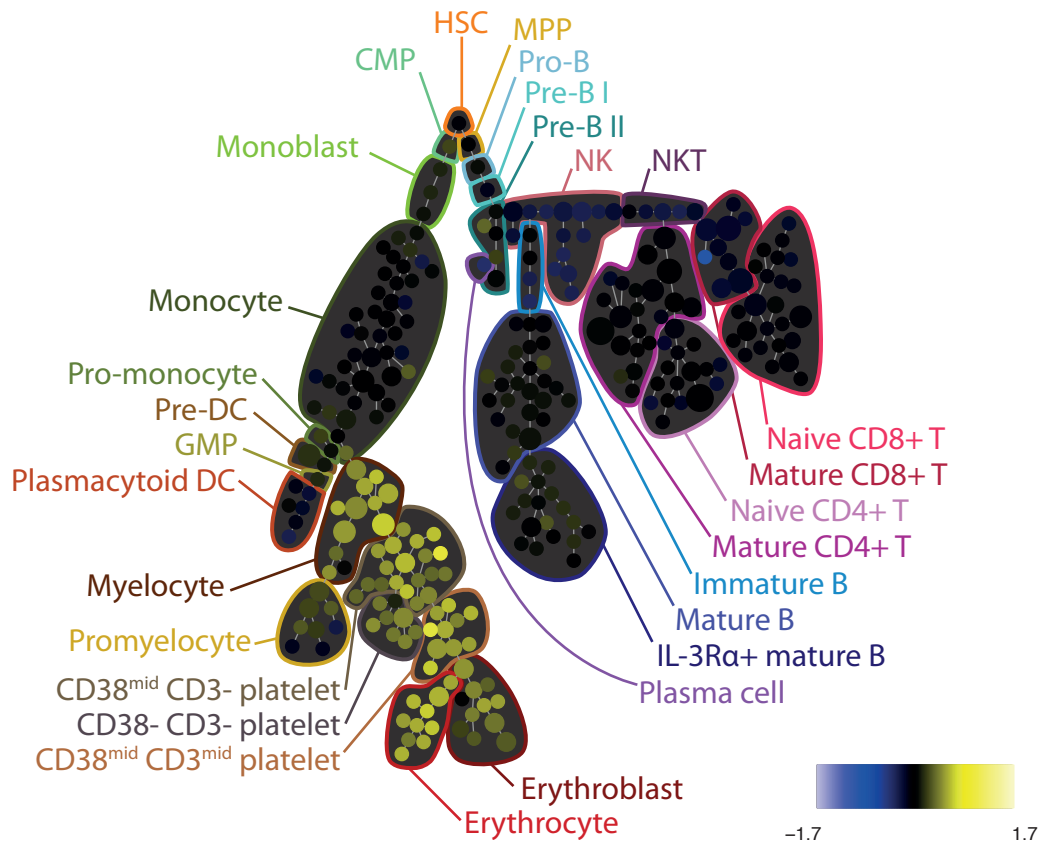



Figure S8C

175-pCrkL ---- JAKi+GCSF vs Ref Ratio

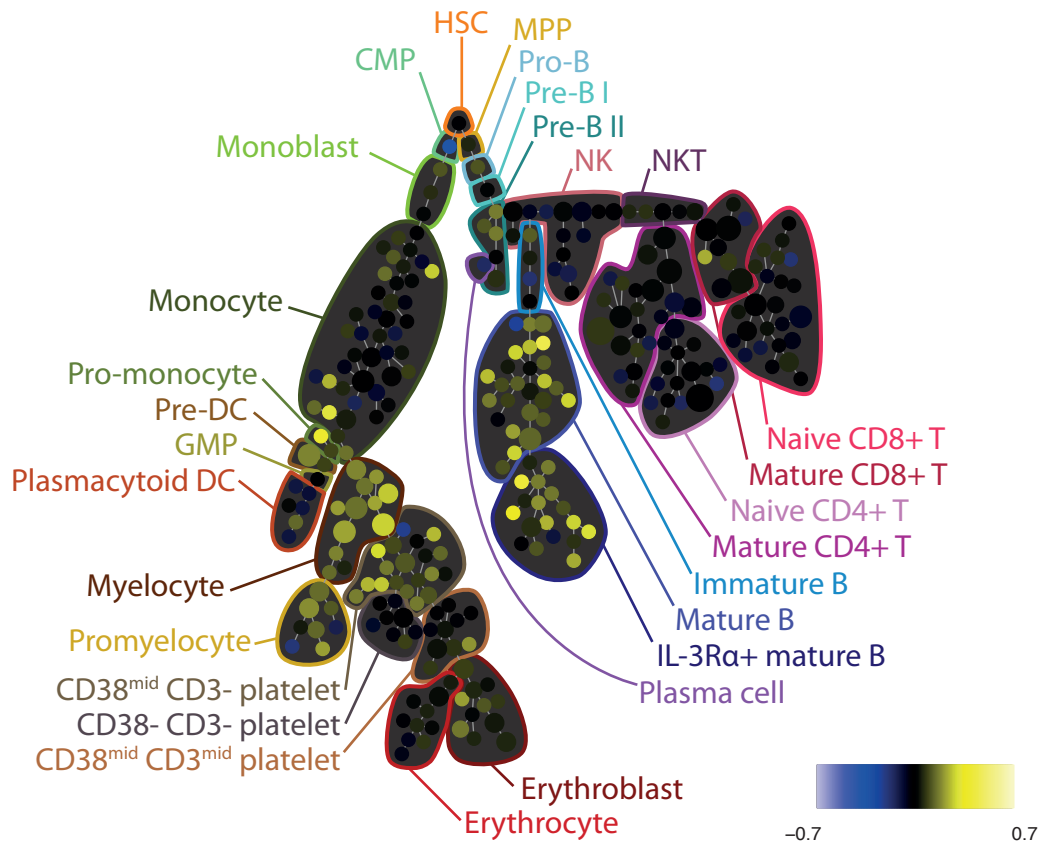

Figure S8C

175-pCrkL ---- JAKi+Unstim vs Ref Ratio

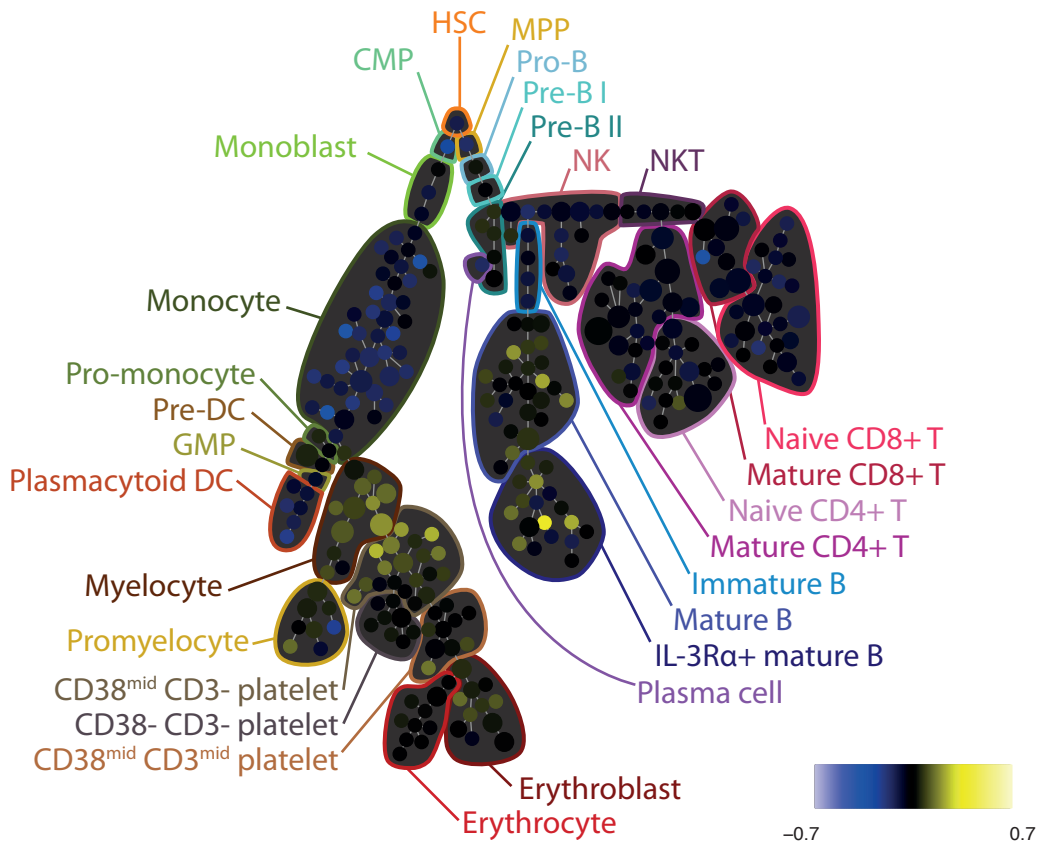

Figure S8C

176-pCREB ---- JAKi+GCSF vs Ref Ratio

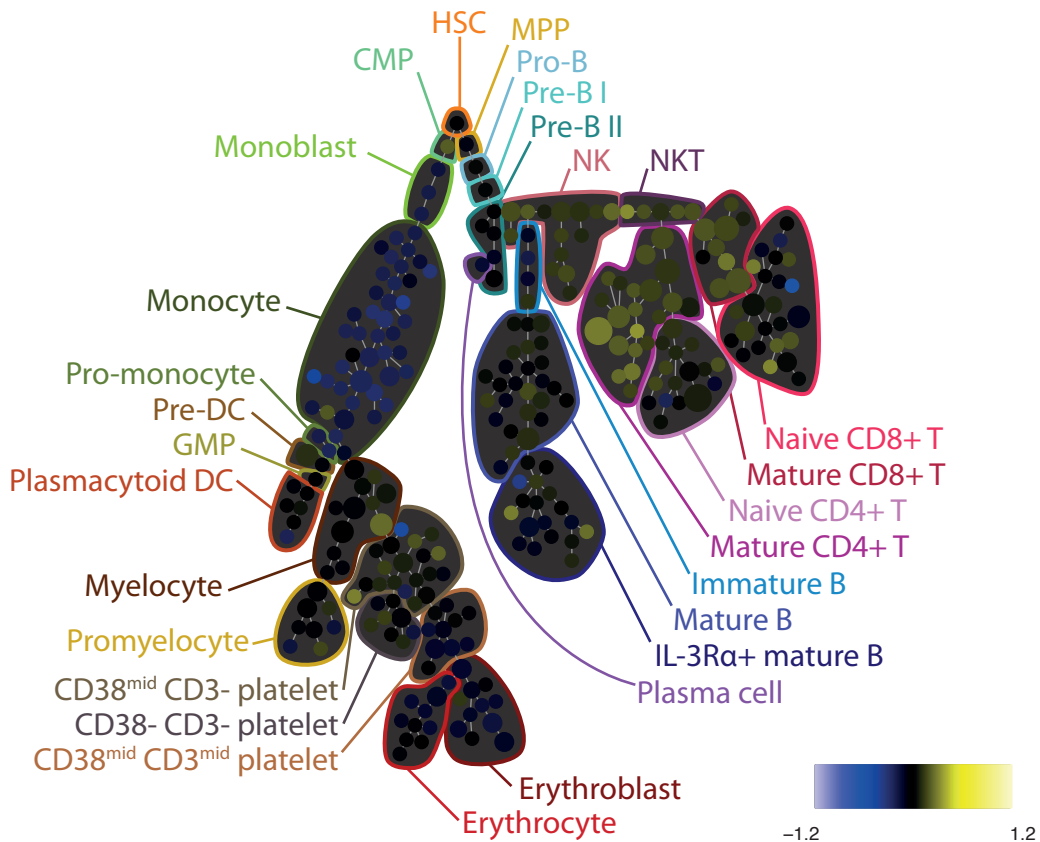

Figure S8C

176-pCREB ---- JAKi+Unstim vs Ref Ratio

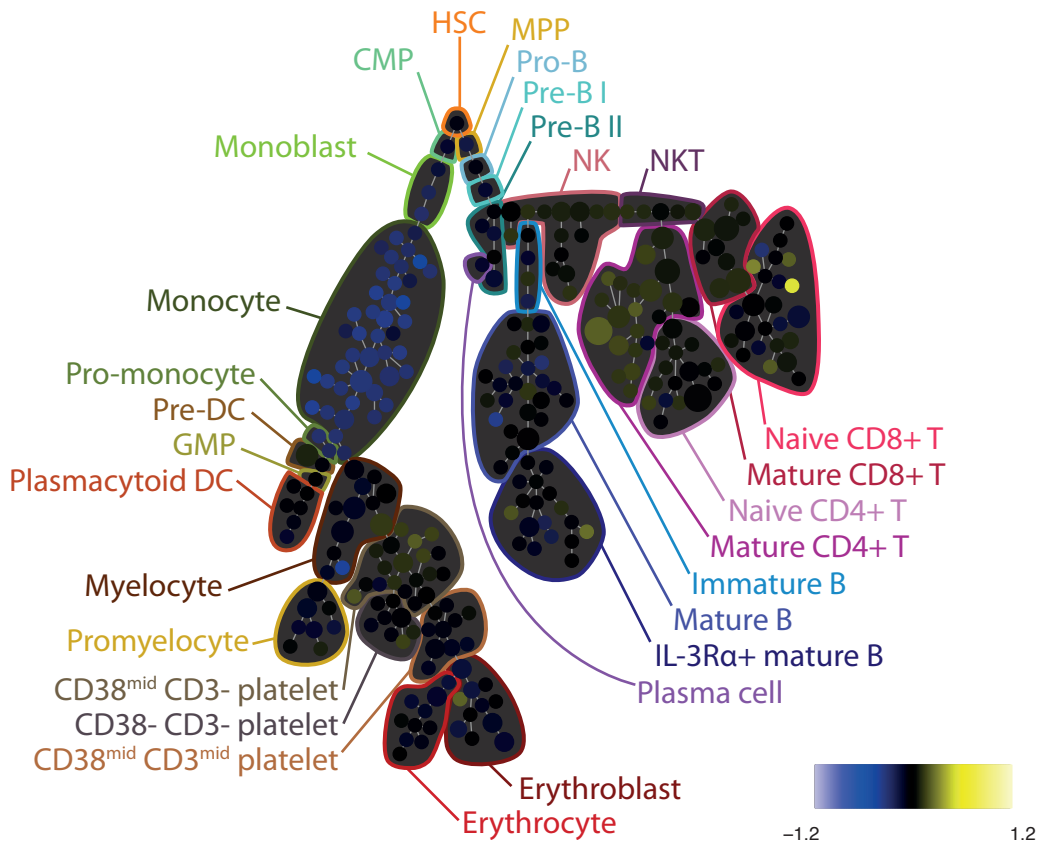

Figure S9A

141-pPLCgamma2 ---- BCR vs Ref Ratio

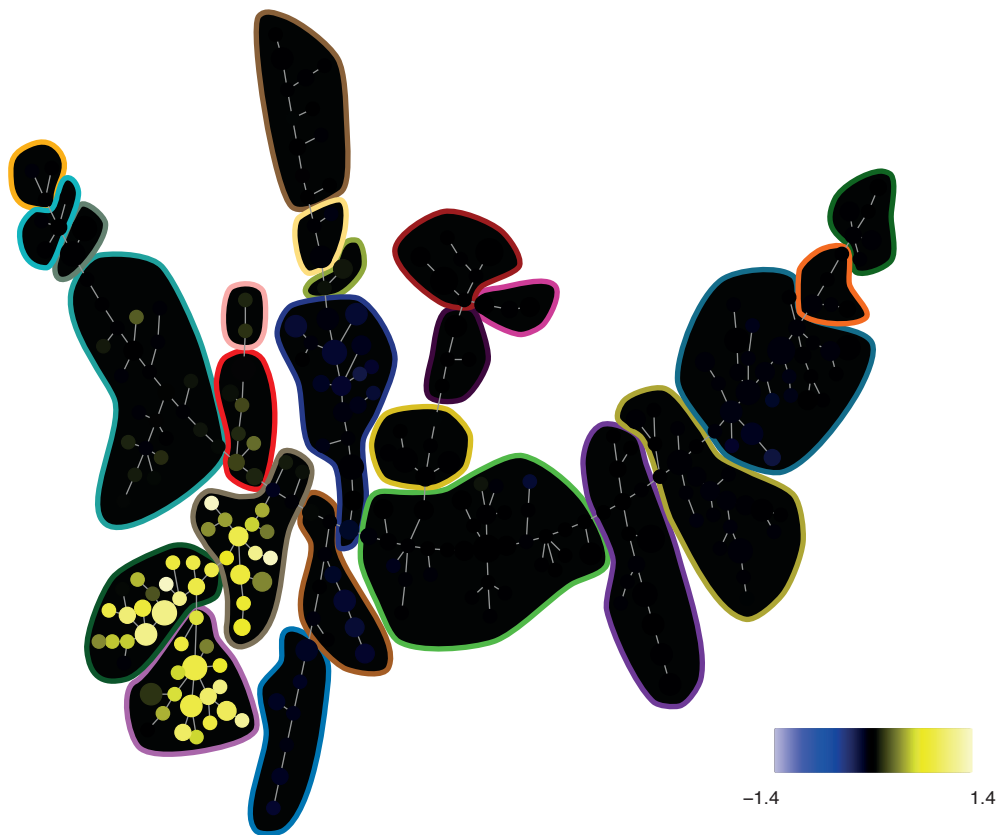

Figure S9A

141-pPLCgamma2 --- DMSO vs Ref Ratio

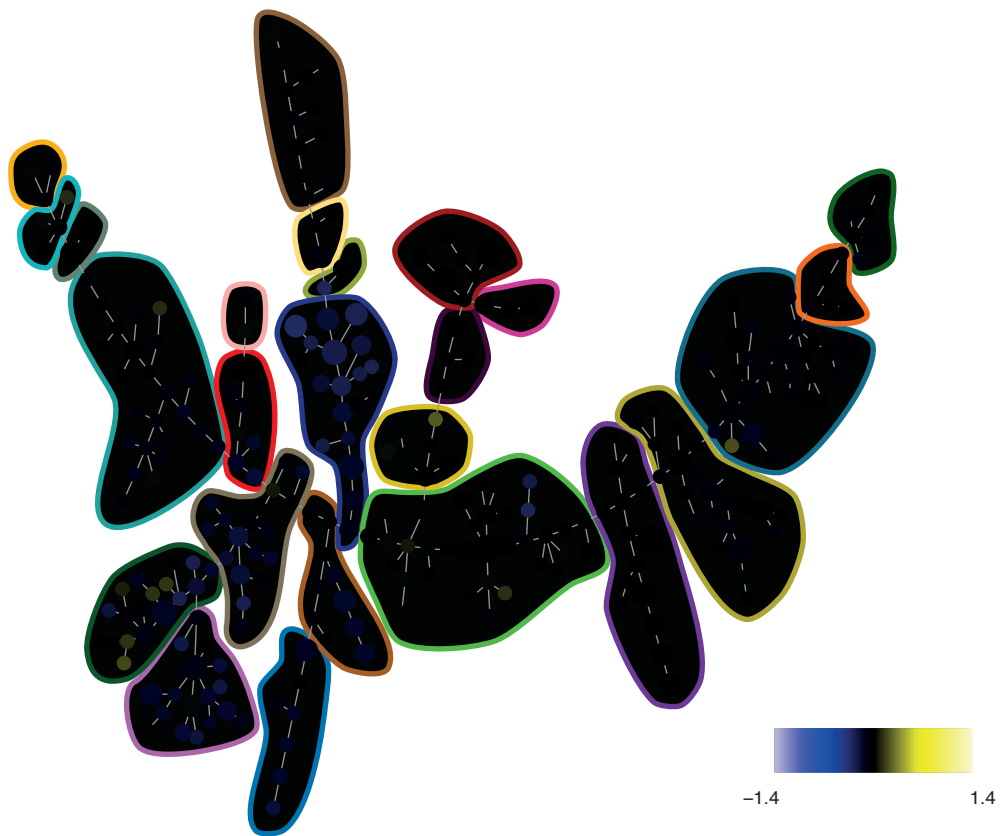

Figure S9A

141-pPLCgamma2 ---- Flt3L vs Ref Ratio

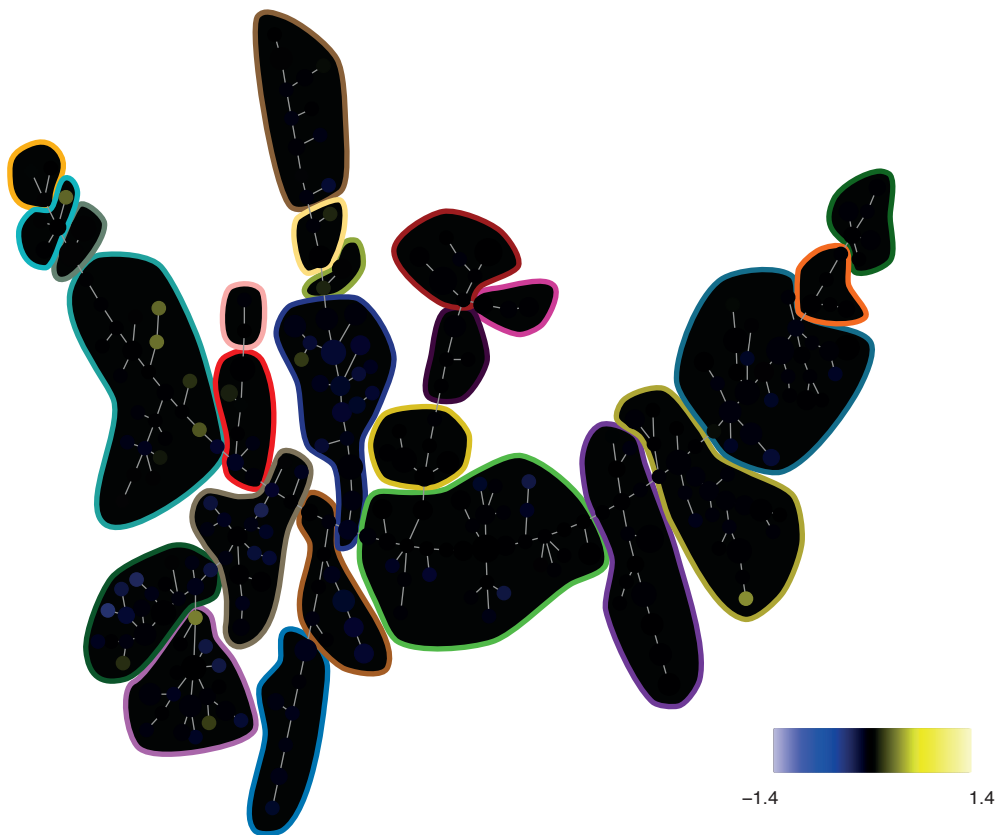

Figure S9A

141-pPLCgamma2 ---- GCSF vs Ref Ratio

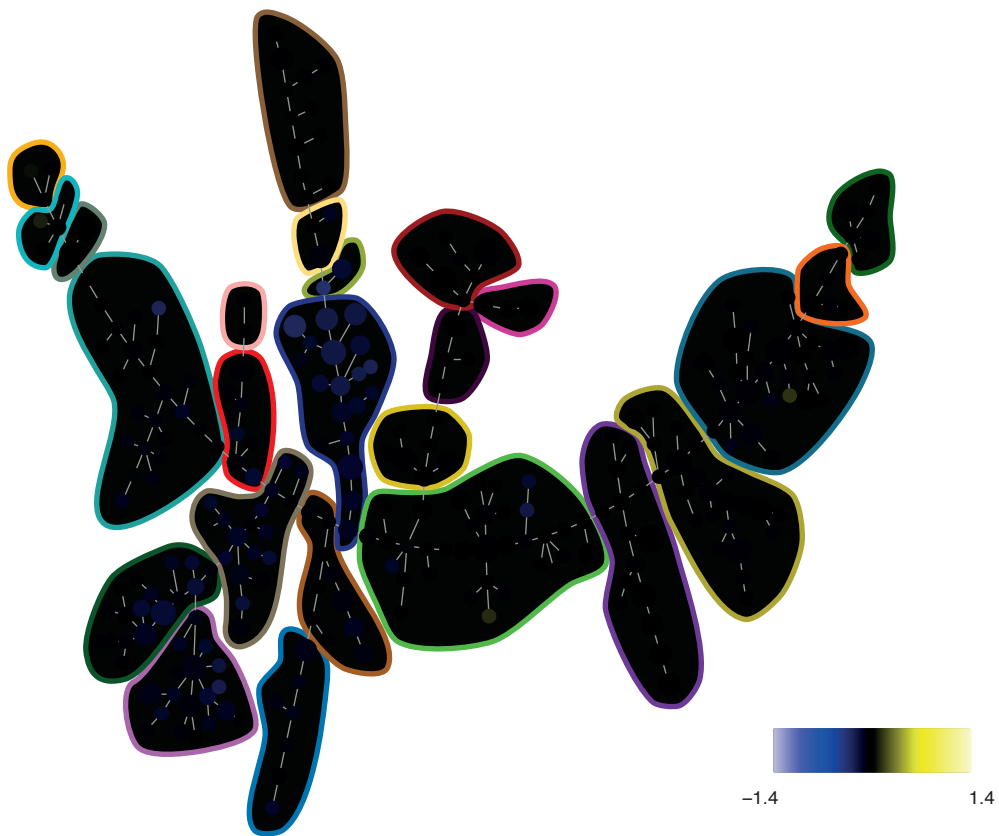



Figure S9A

141-pPLCgamma2 ---- GMCSF vs Ref Ratio

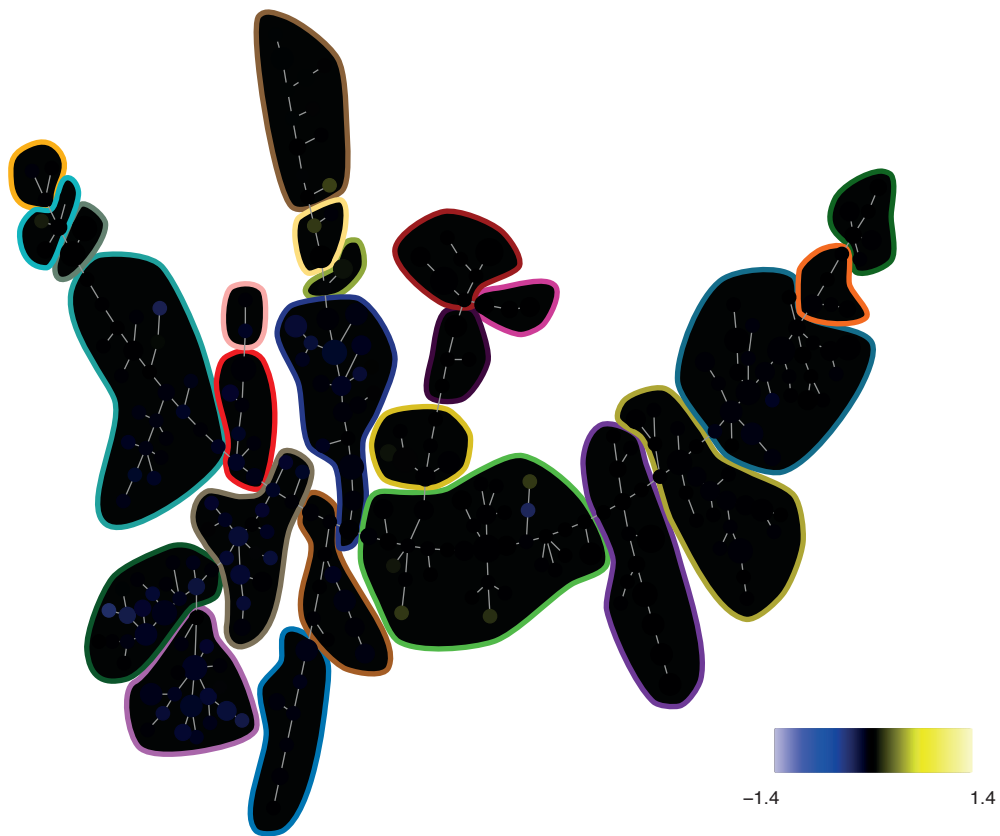

Figure S9A

141-pPLCgamma2 ---- IFNad vs Ref Ratio

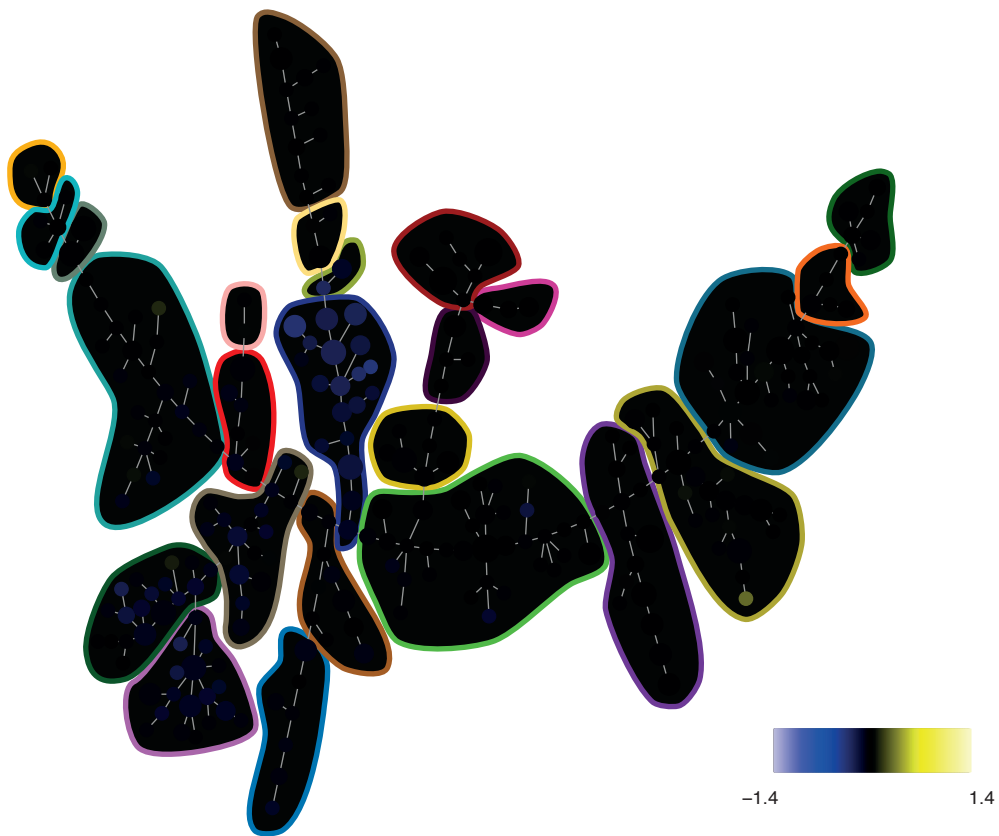

Figure S9A

141-pPLCgamma2 ---- IL3 vs Ref Ratio

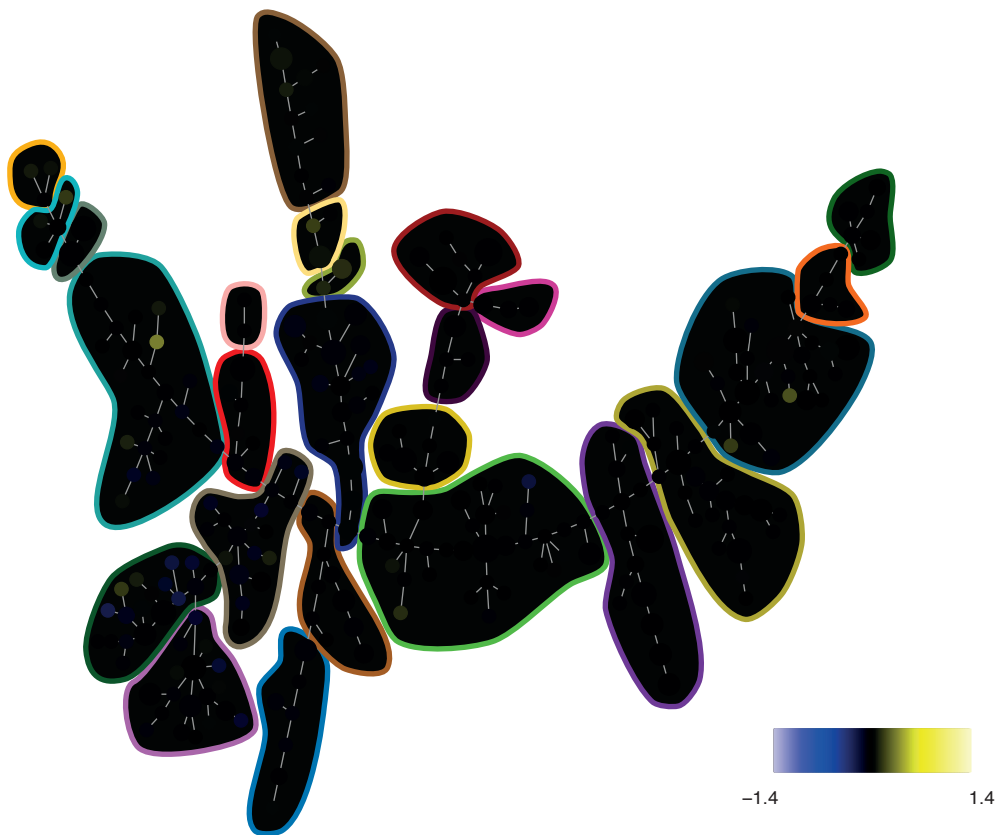

Figure S9A

141-pPLCgamma2 ---- IL7 vs Ref Ratio

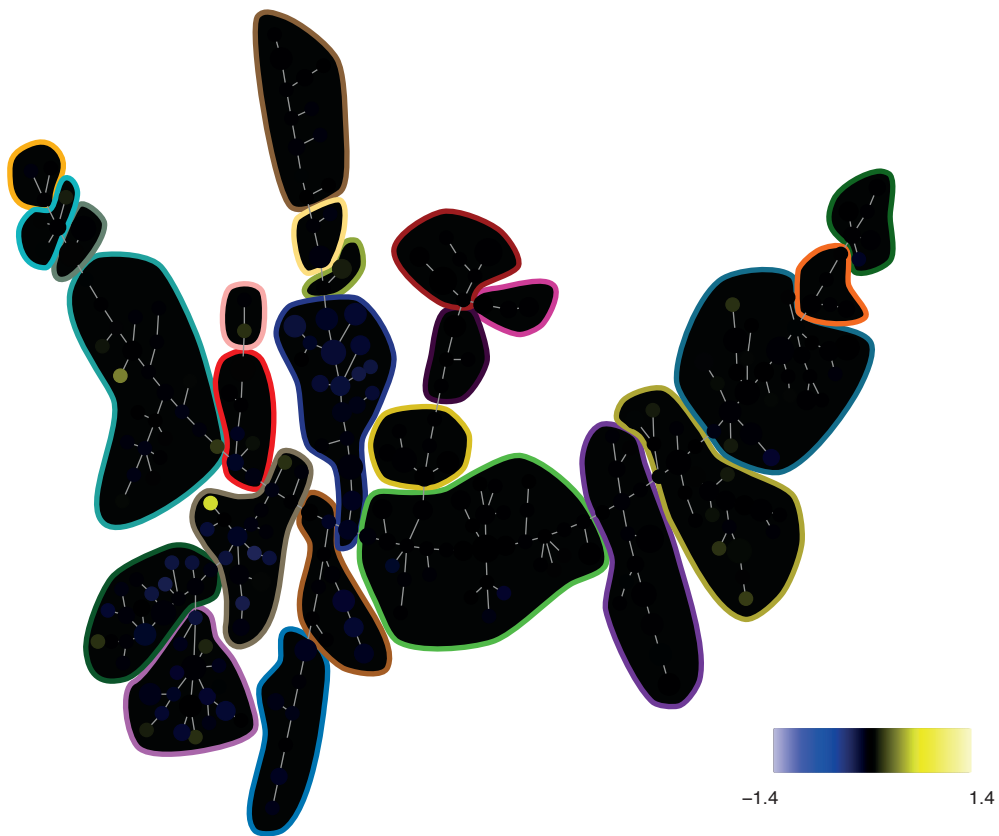

Figure S9A

141-pPLCgamma2 ---- LPS vs Ref Ratio

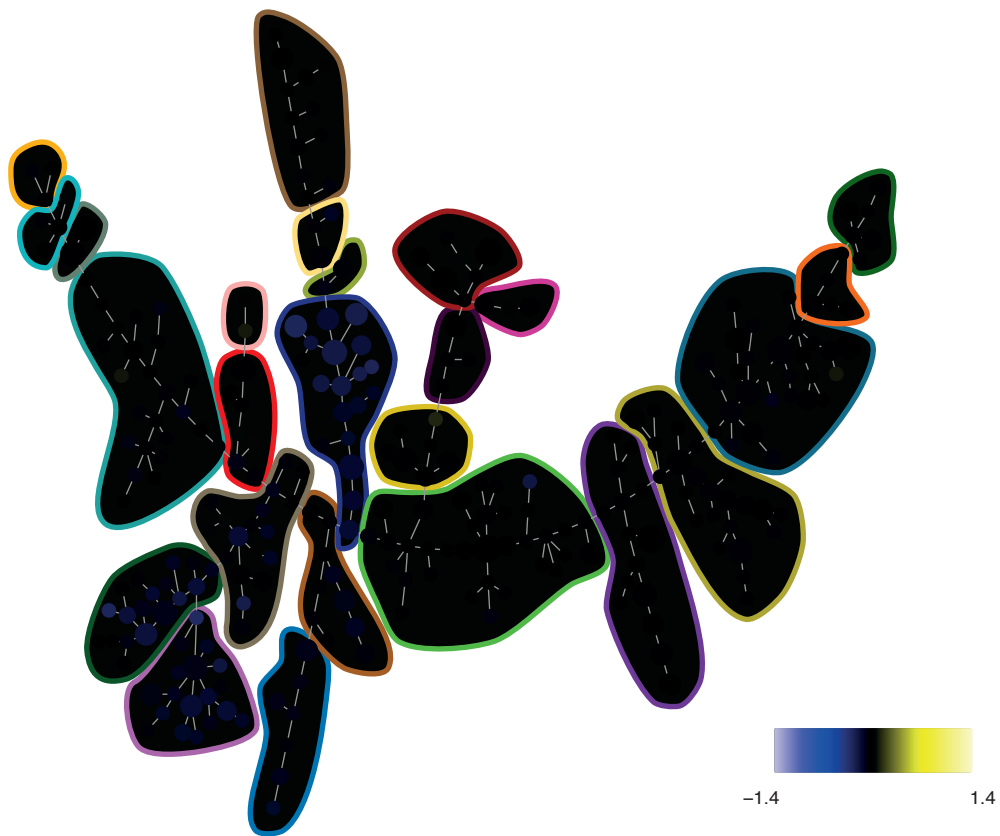

Figure S9A

141-pPLCgamma2 --- PMAiono vs Ref Ratio

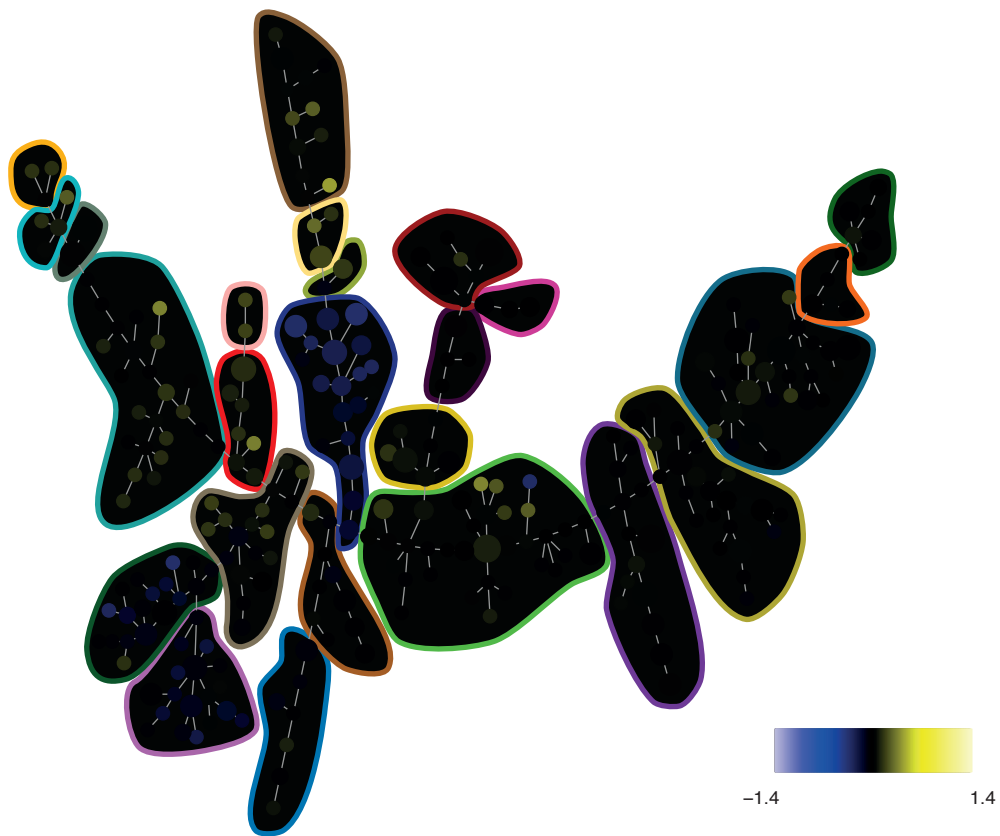

Figure S9A

141-pPLCgamma2 ---- PVO4 vs Ref Ratio

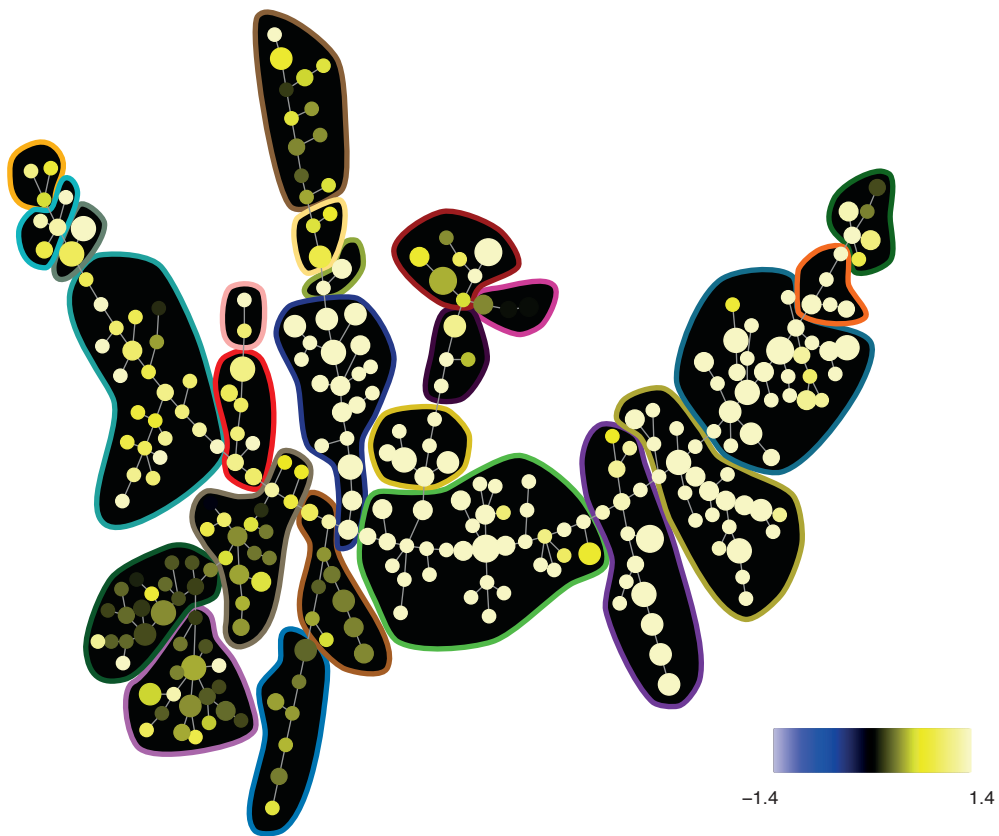

Figure S9A

141-pPLCgamma2 ---- SCF vs Ref Ratio

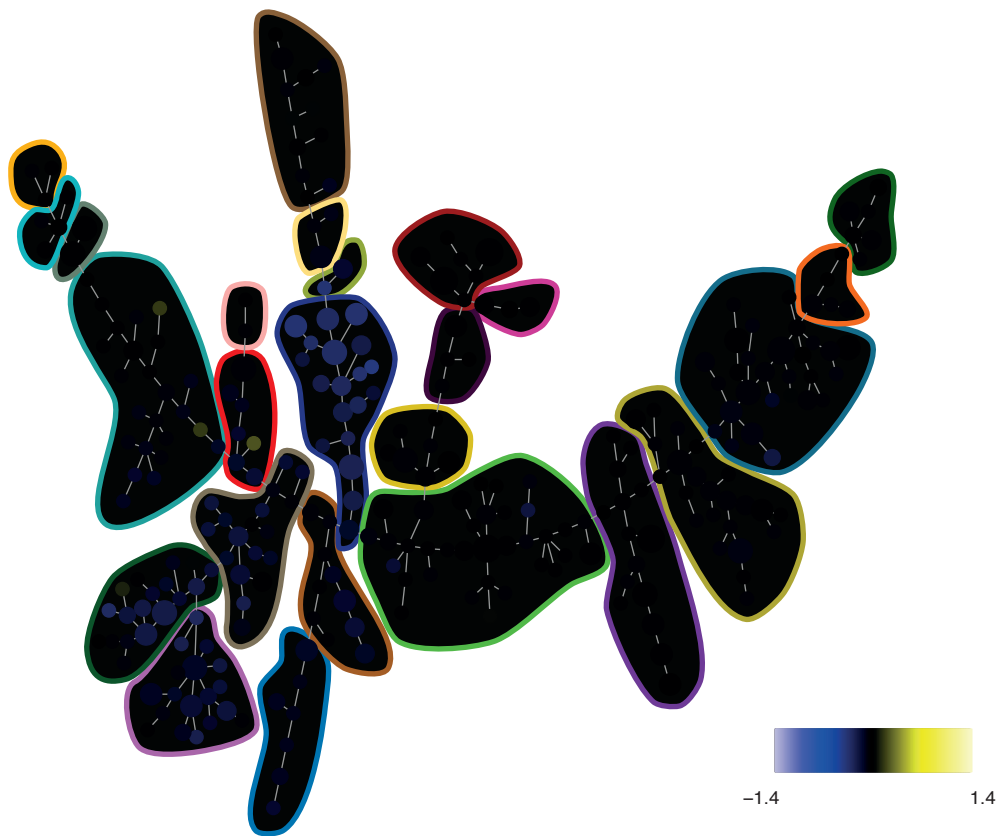



Figure S9A

141-pPLCgamma2 ---- TNFa vs Ref Ratio

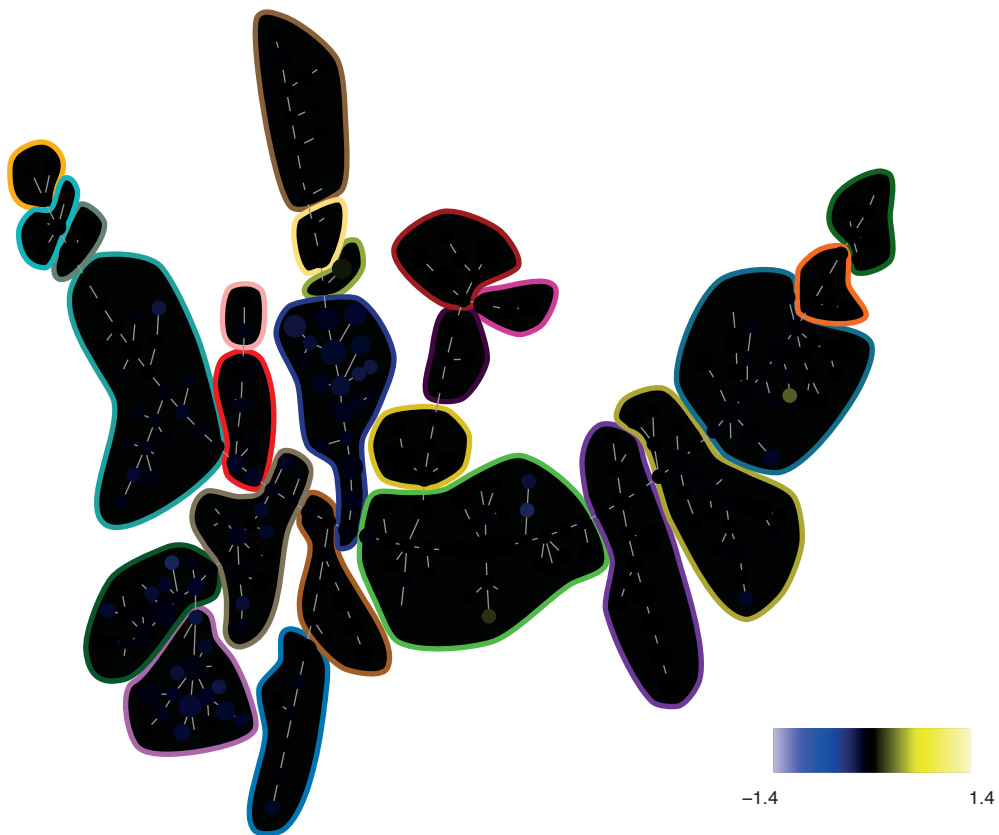

Figure S9A

141-pPLCgamma2 ---- TPO vs Ref Ratio

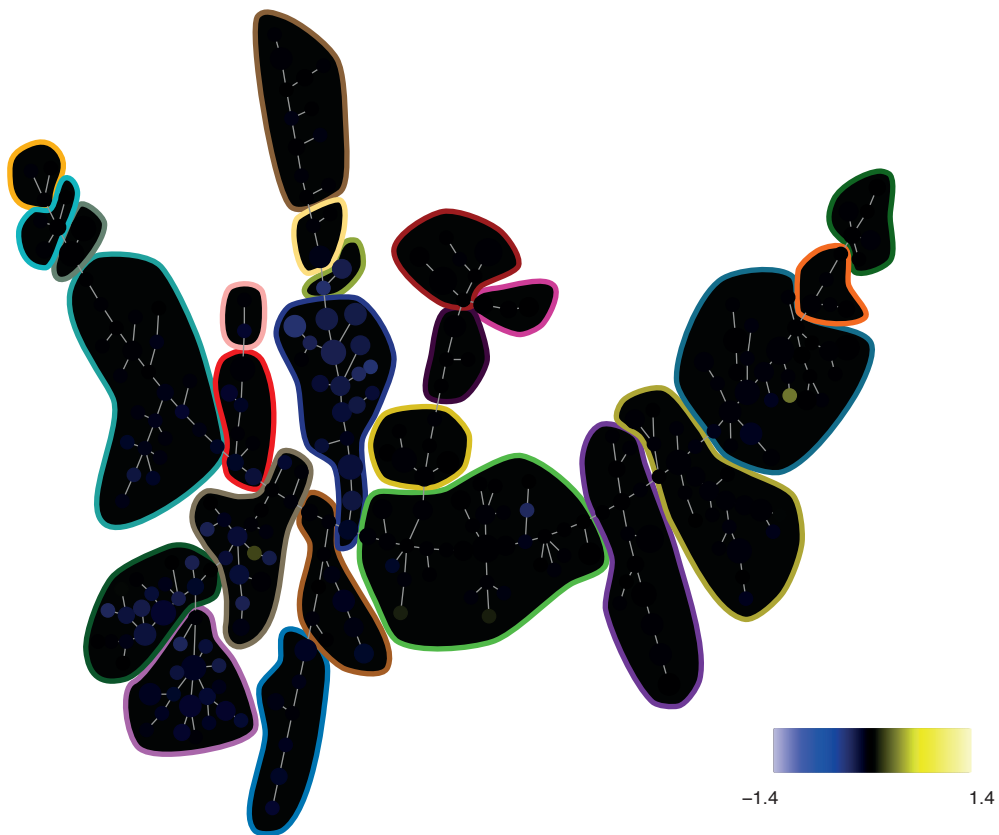

Figure S9A

150-pSTAT5 ---- BCR vs Ref Ratio

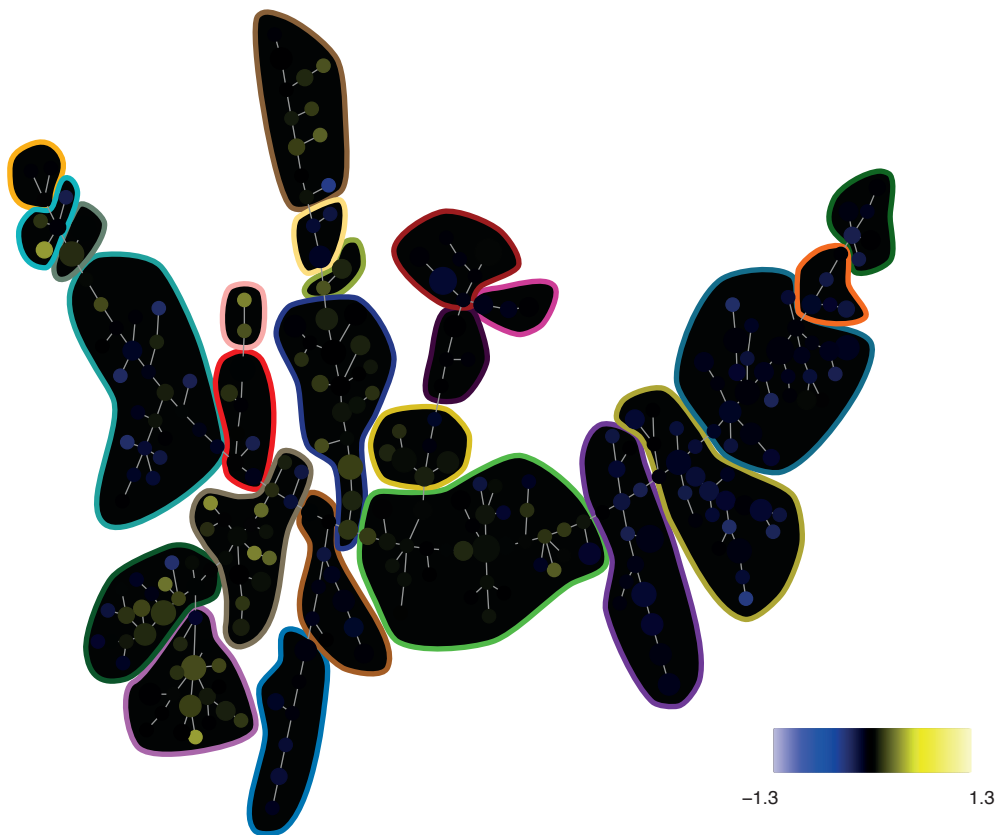

Figure S9A

150-pSTAT5 ---- DMSO vs Ref Ratio

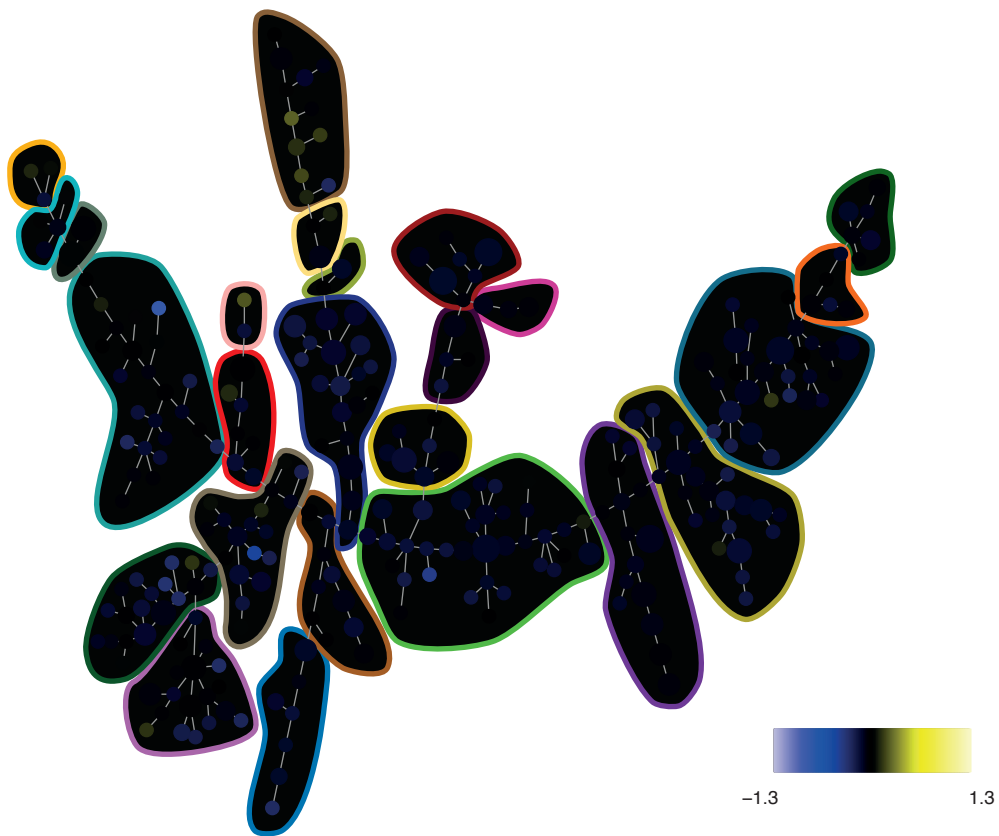

Figure S9A

150-pSTAT5 ---- Flt3L vs Ref Ratio

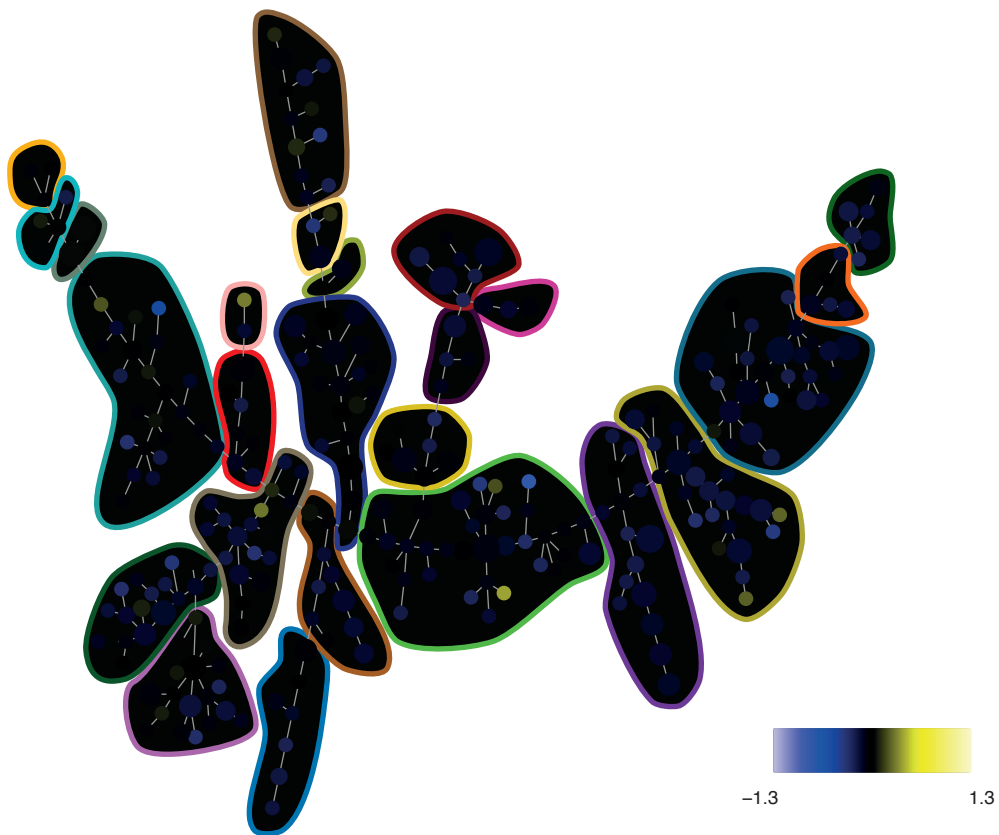

Figure S9A

150-pSTAT5 --- GCSF vs Ref Ratio

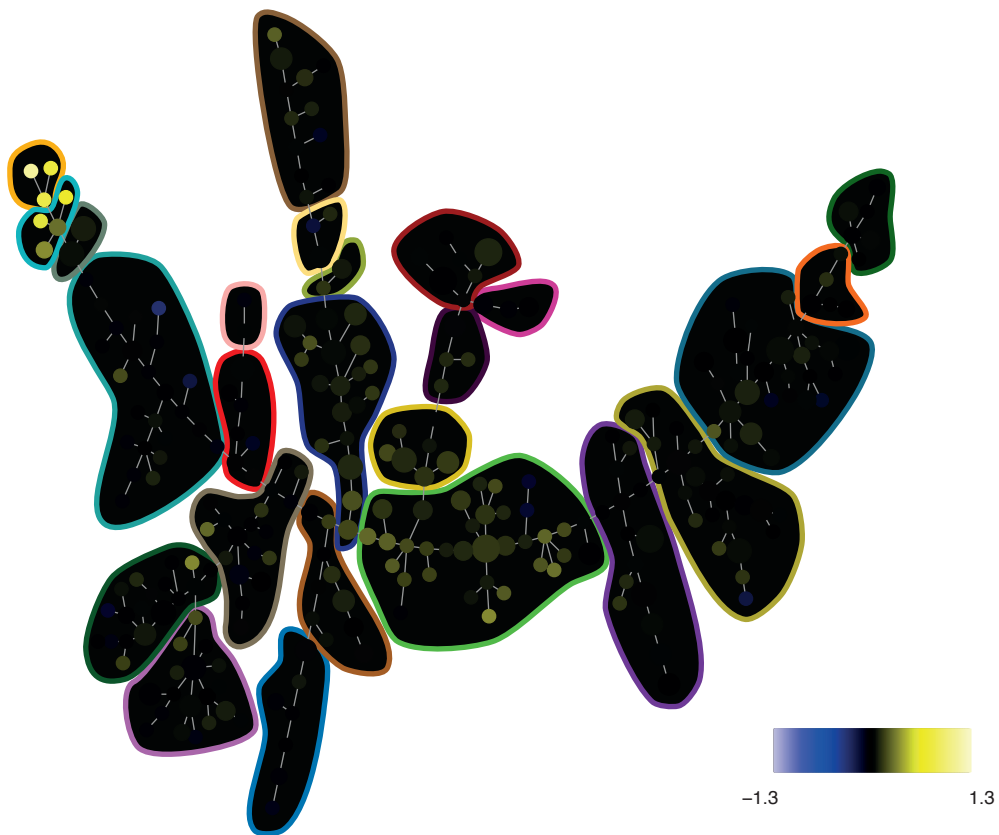

Figure S9A

150-pSTAT5 ---- GMCSF vs Ref Ratio

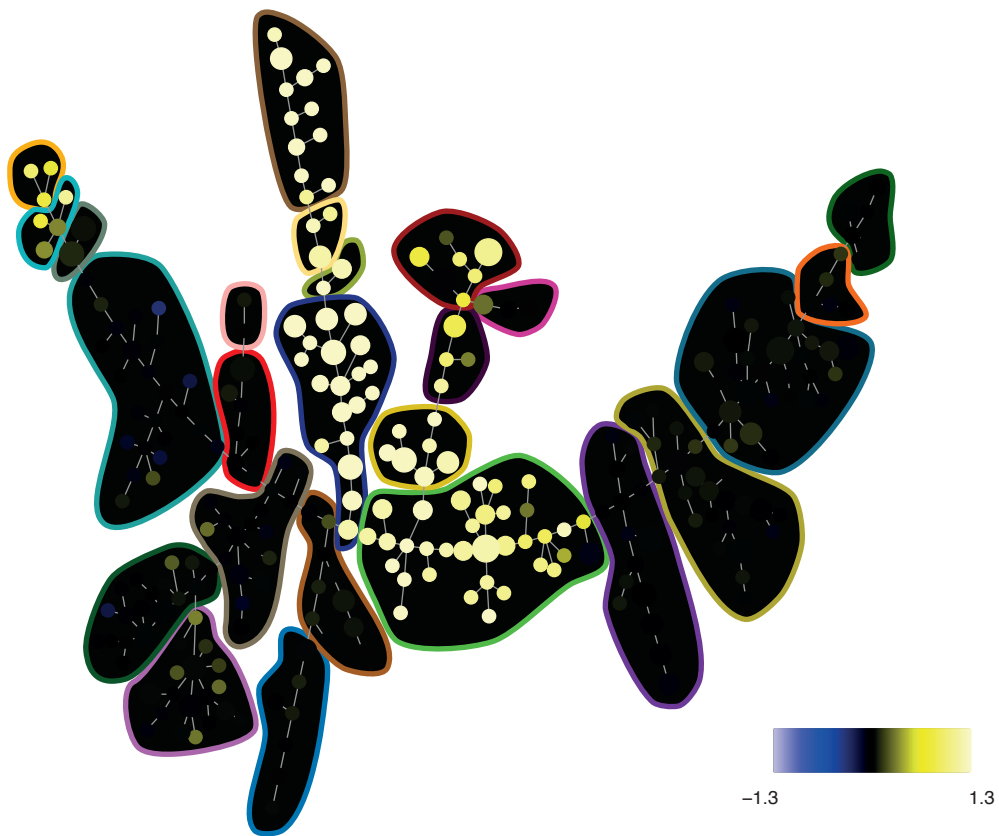

Figure S9A

150-pSTAT5 --- IFNad vs Ref Ratio

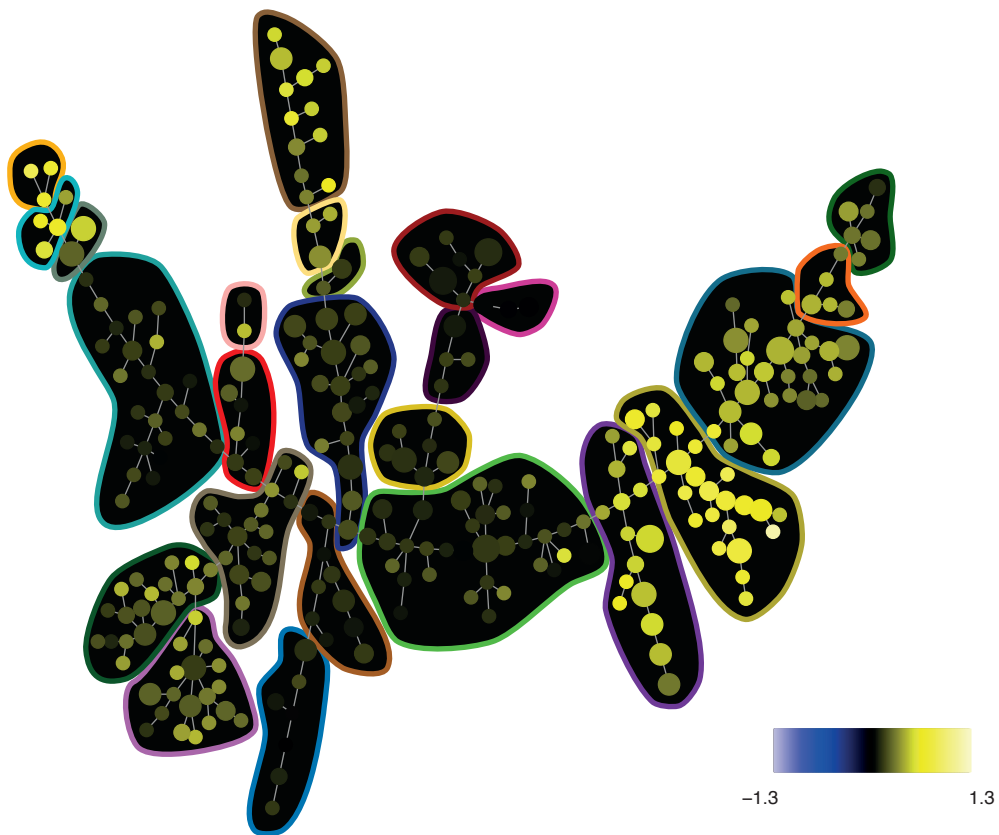



Figure S9A

150-pSTAT5 ---- IL3 vs Ref Ratio

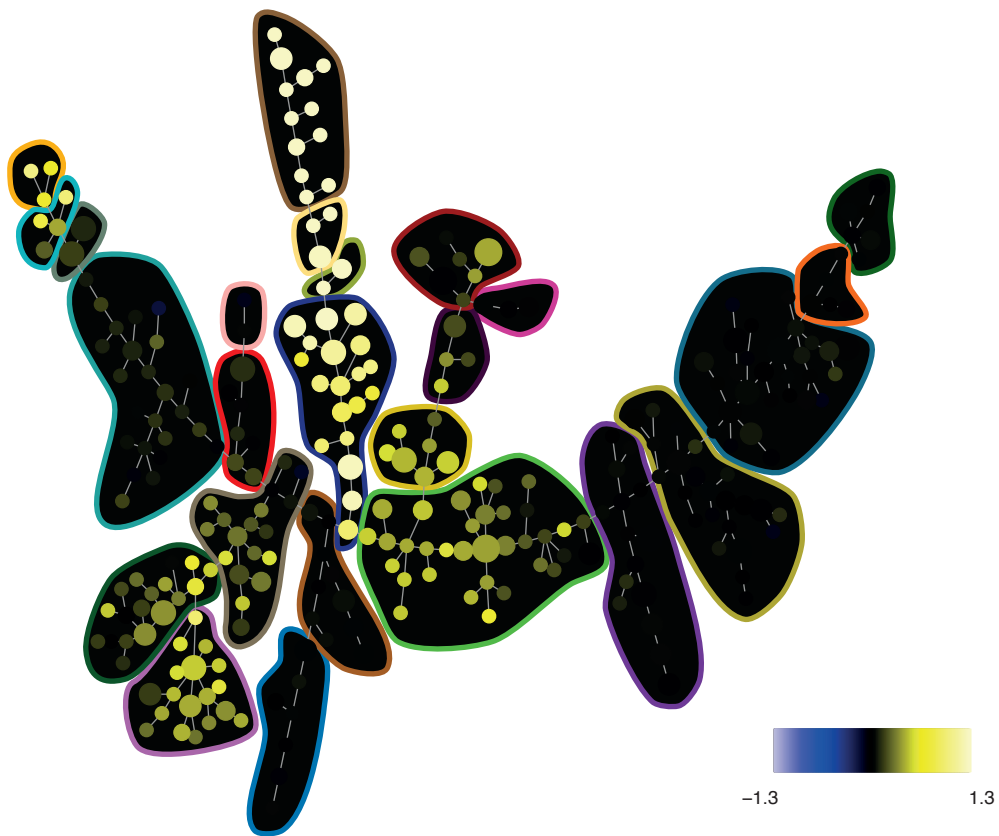

Figure S9A

150-pSTAT5 ---- IL7 vs Ref Ratio

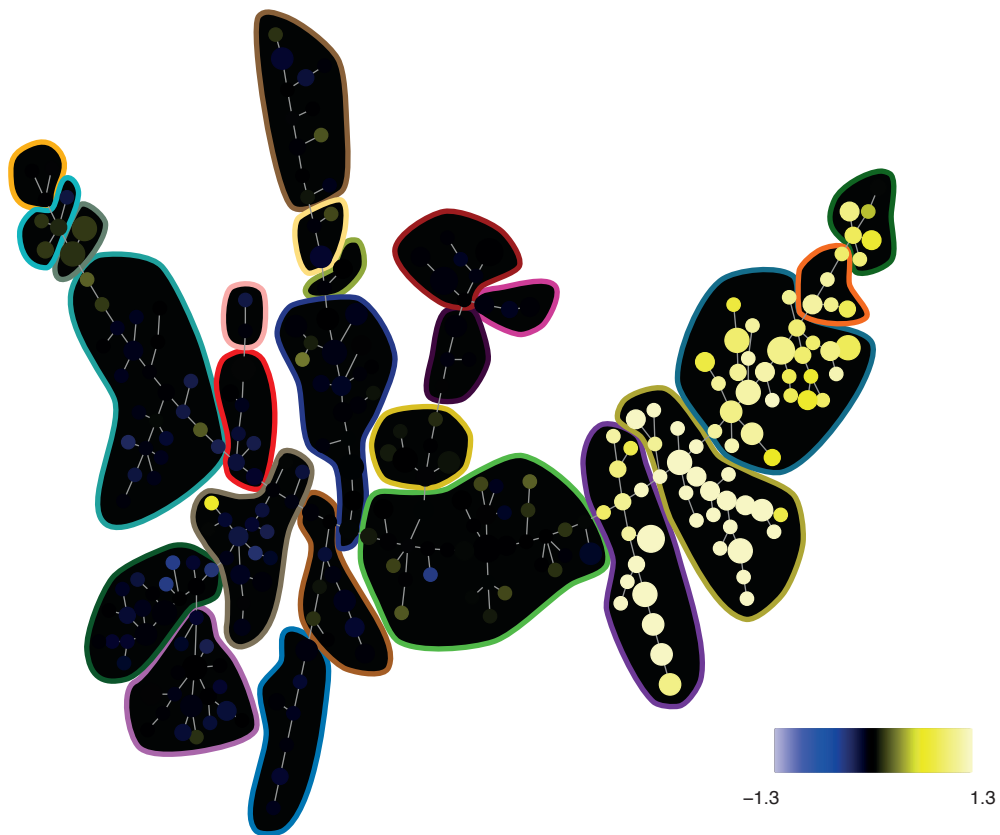

Figure S9A

150-pSTAT5 ---- LPS vs Ref Ratio

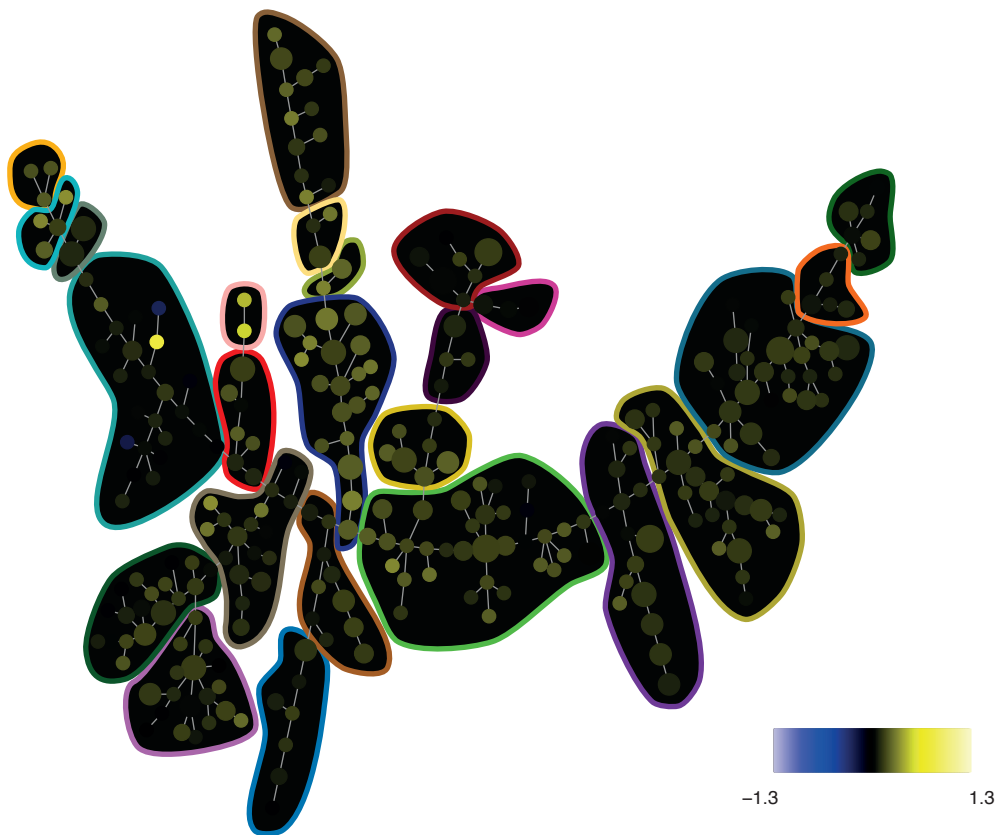

Figure S9A

150-pSTAT5 --- PMAiono vs Ref Ratio

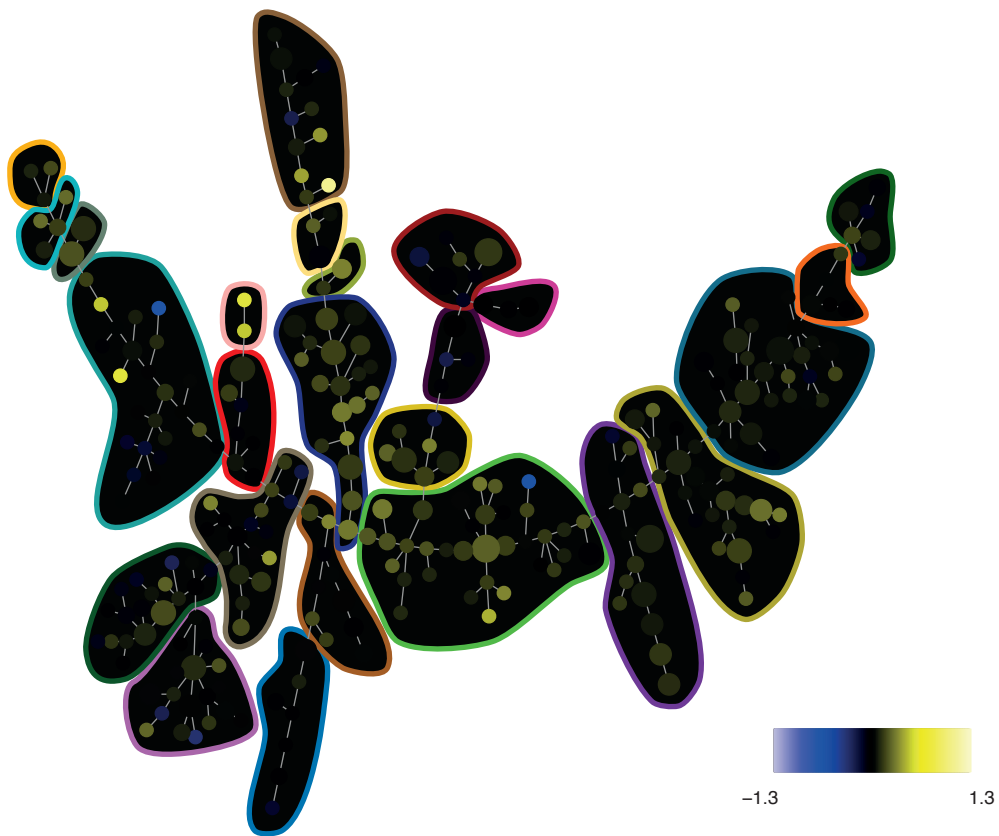

Figure S9A

150-pSTAT5 ---- PVO4 vs Ref Ratio

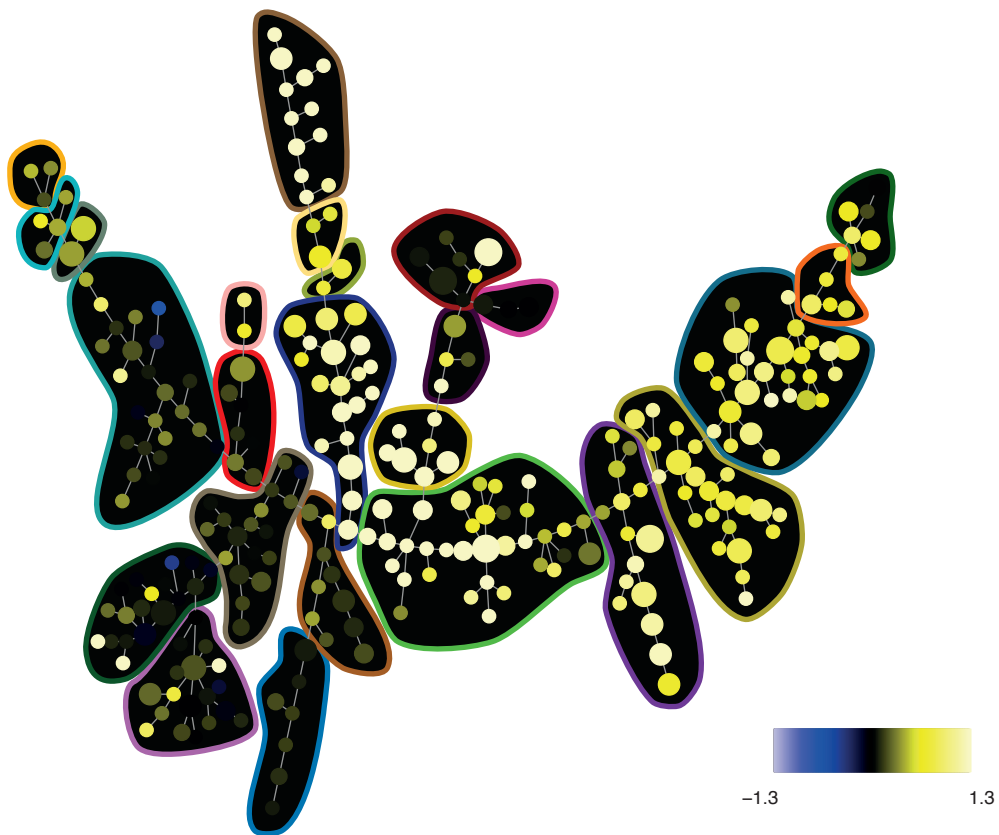

Figure S9A

150-pSTAT5 ---- SCF vs Ref Ratio

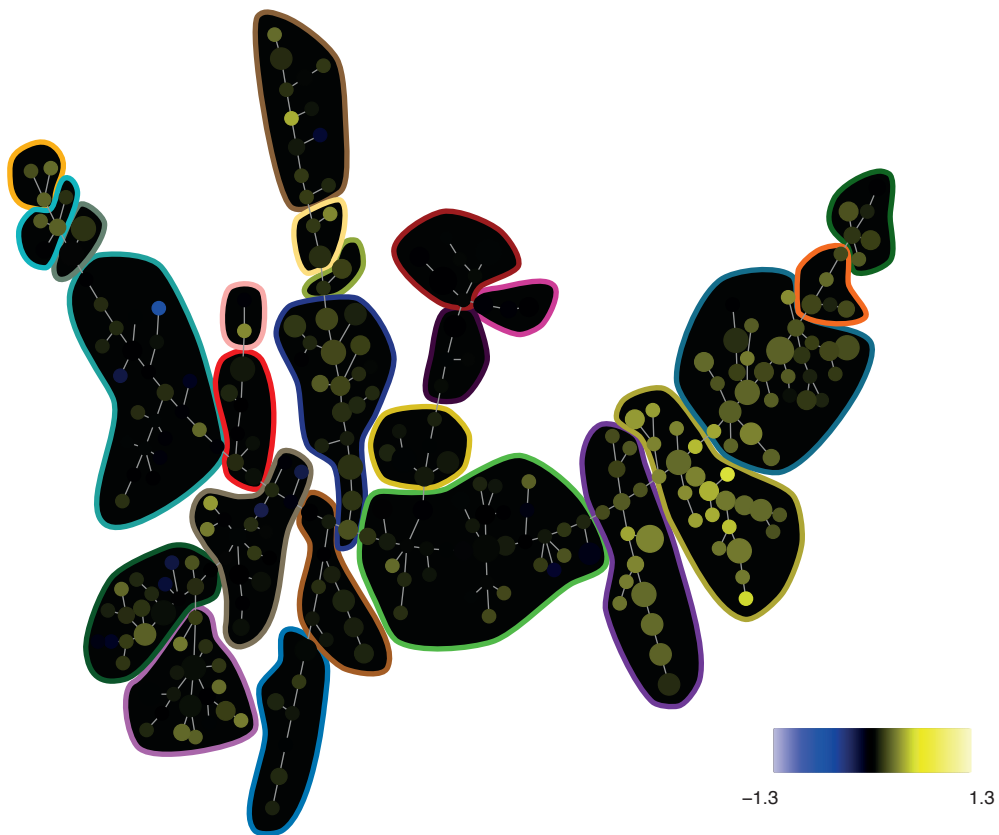

Figure S9A

150-pSTAT5 ---- TNFa vs Ref Ratio

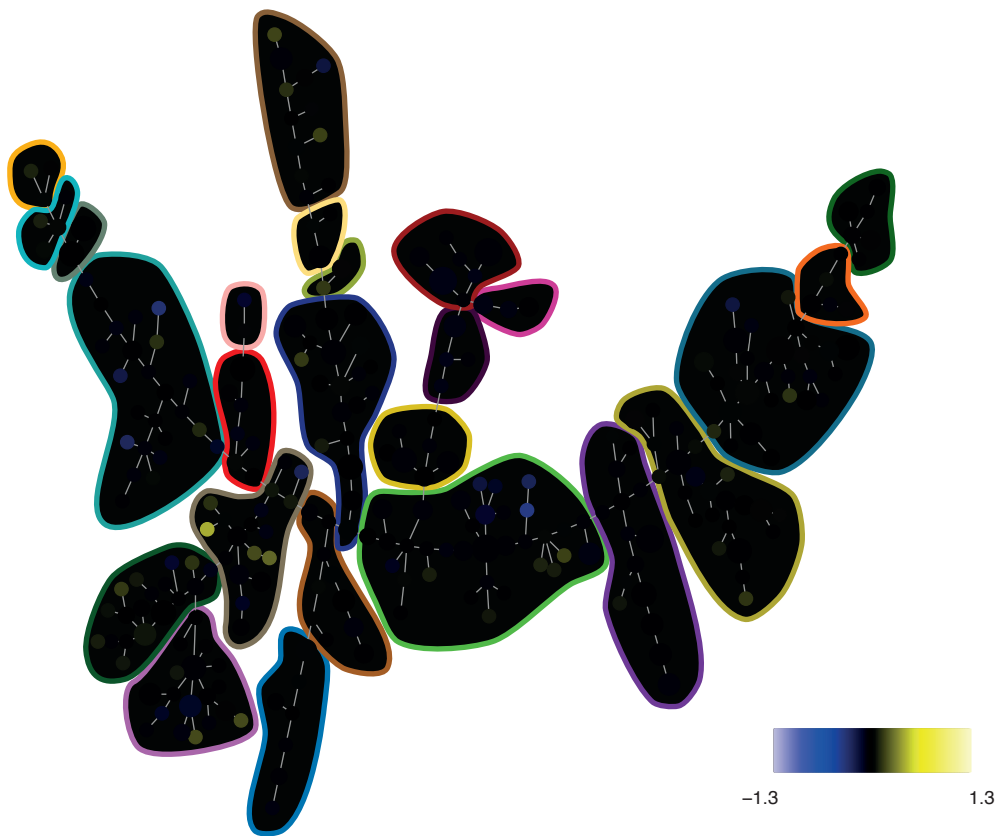

Figure S9A

150-pSTAT5 ---- TPO vs Ref Ratio

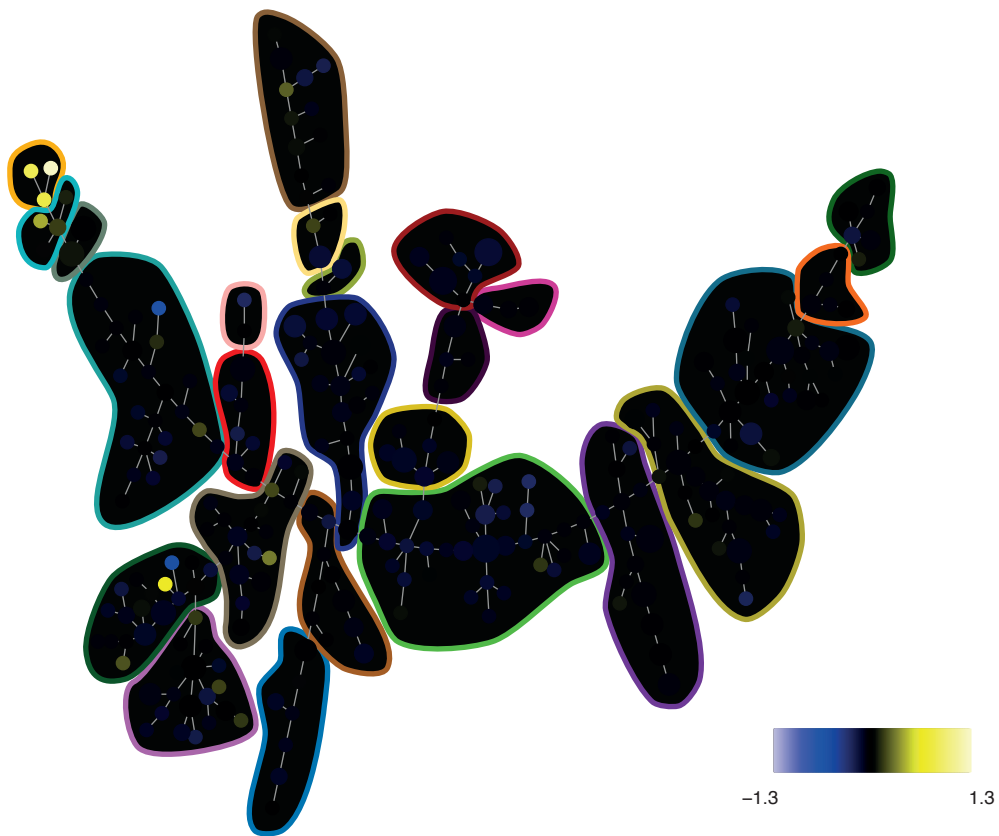



Figure S9A

151-pERK1/2 ---- BCR vs Ref Ratio

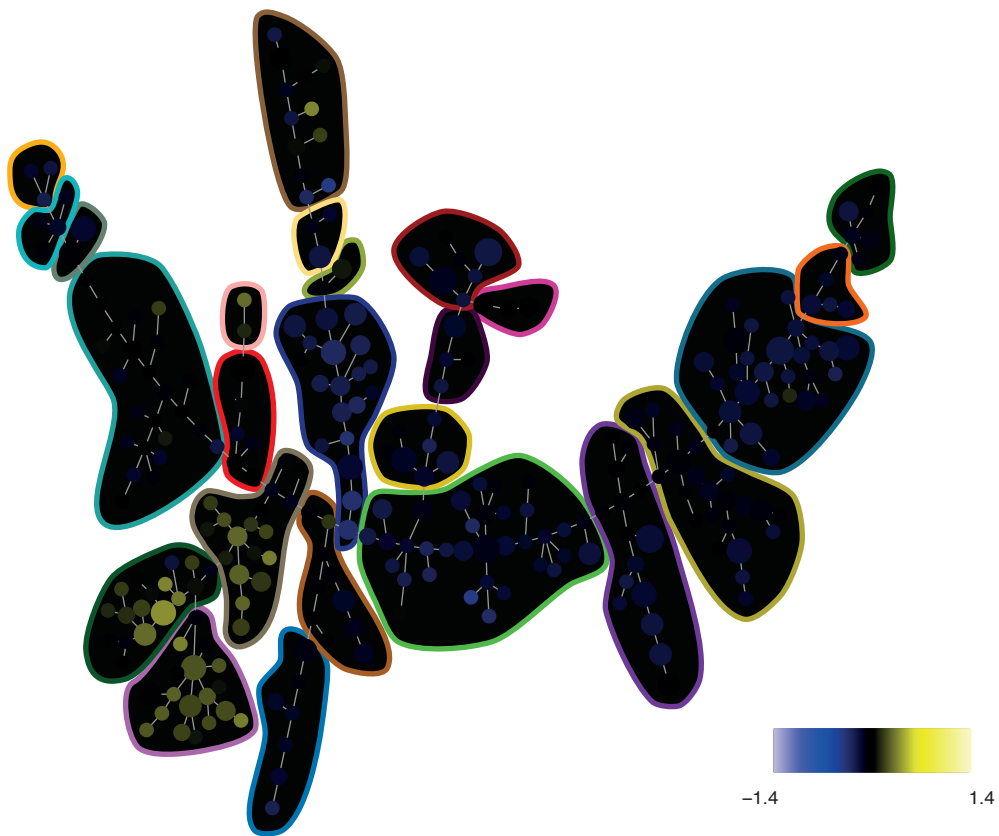

Figure S9A

151-pERK1/2 --- DMSO vs Ref Ratio

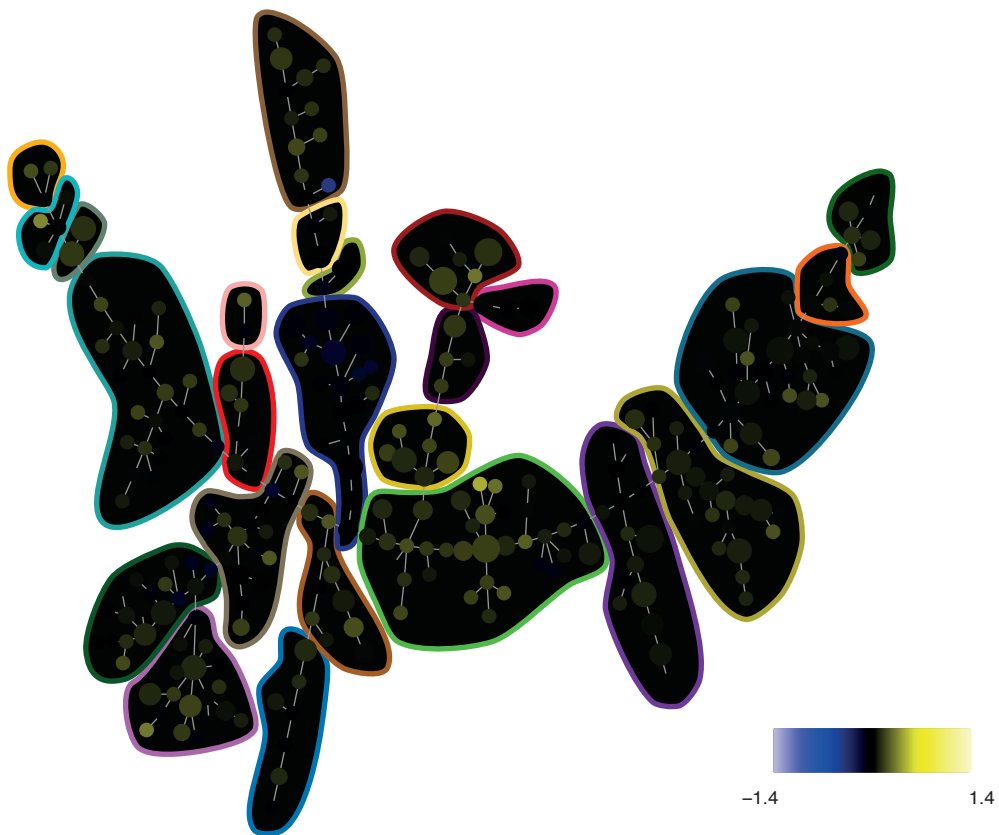

Figure S9A

151-pERK1/2 ---- Flt3L vs Ref Ratio

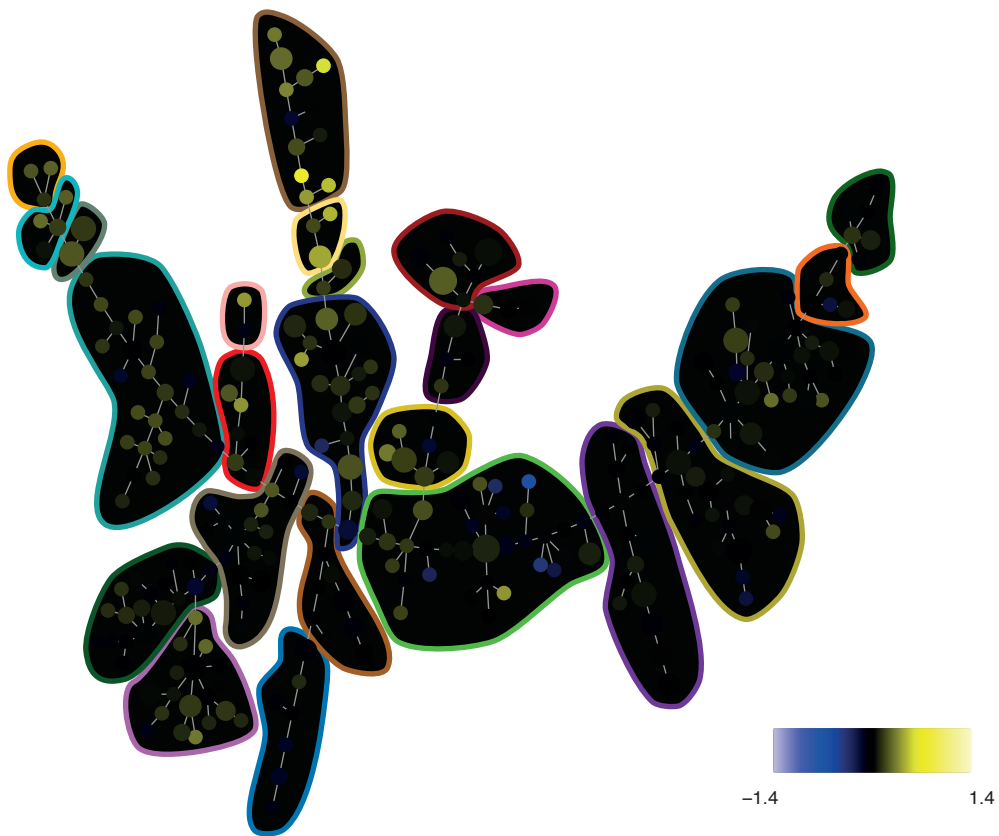

Figure S9A

151-pERK1/2 ---- GCSF vs Ref Ratio

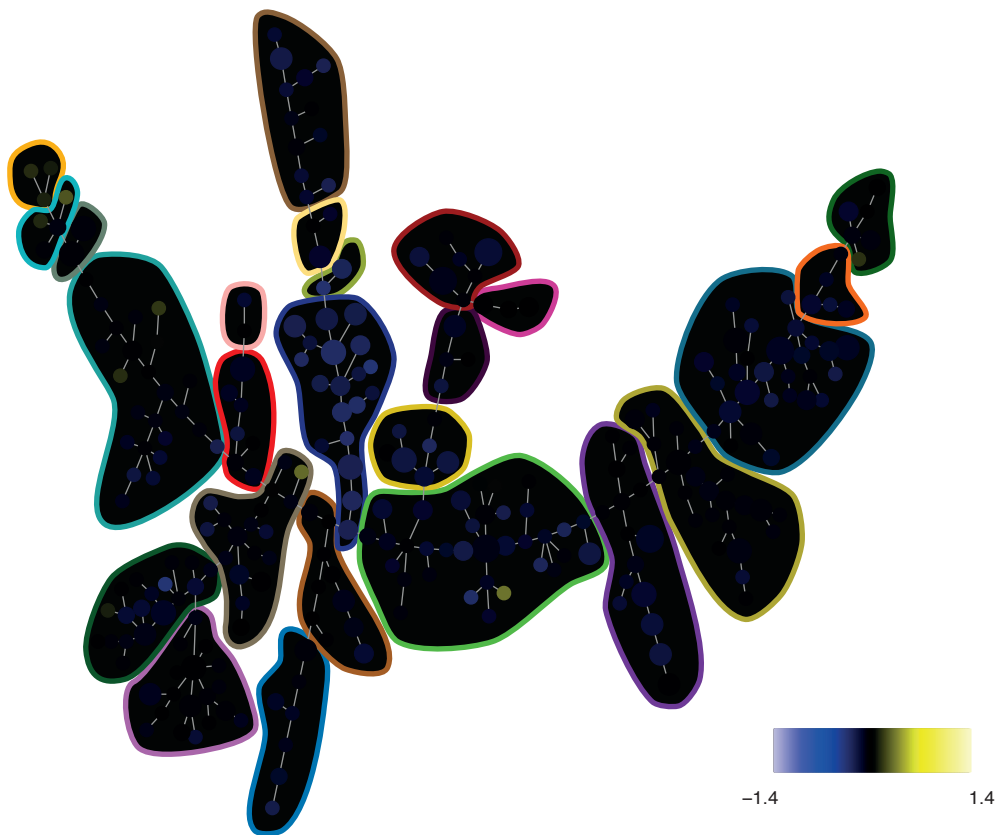

Figure S9A

151-pERK1/2 ---- GMCSF vs Ref Ratio

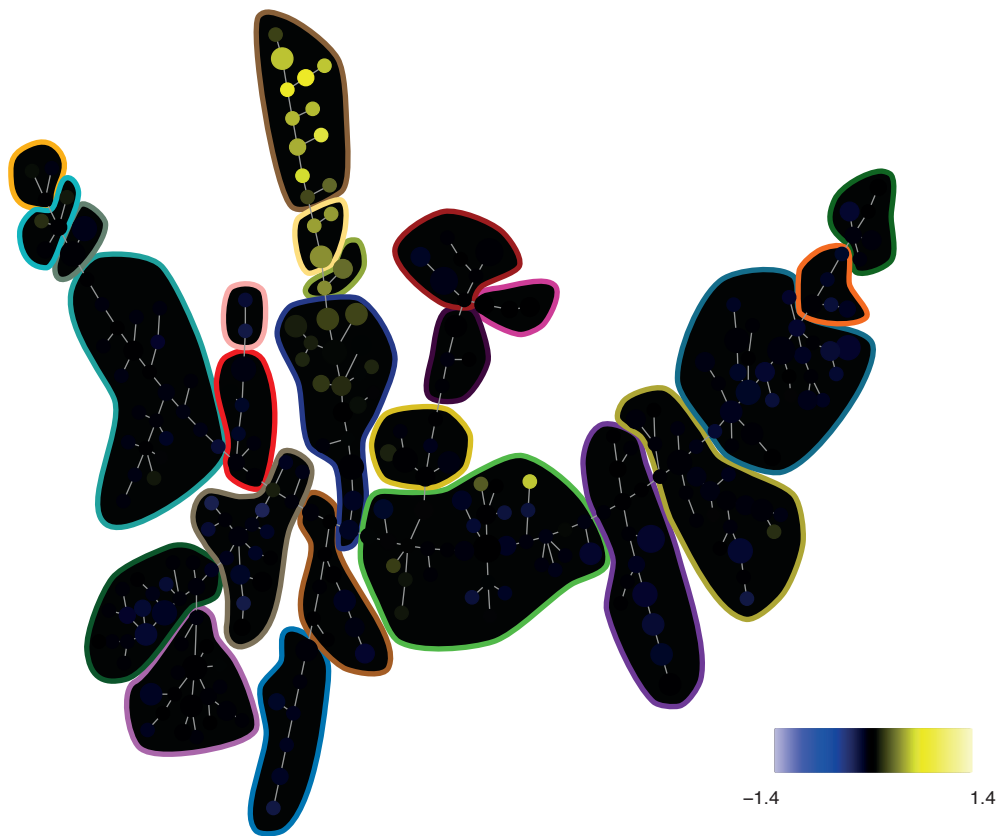

Figure S9A

151-pERK1/2 ---- IFNad vs Ref Ratio

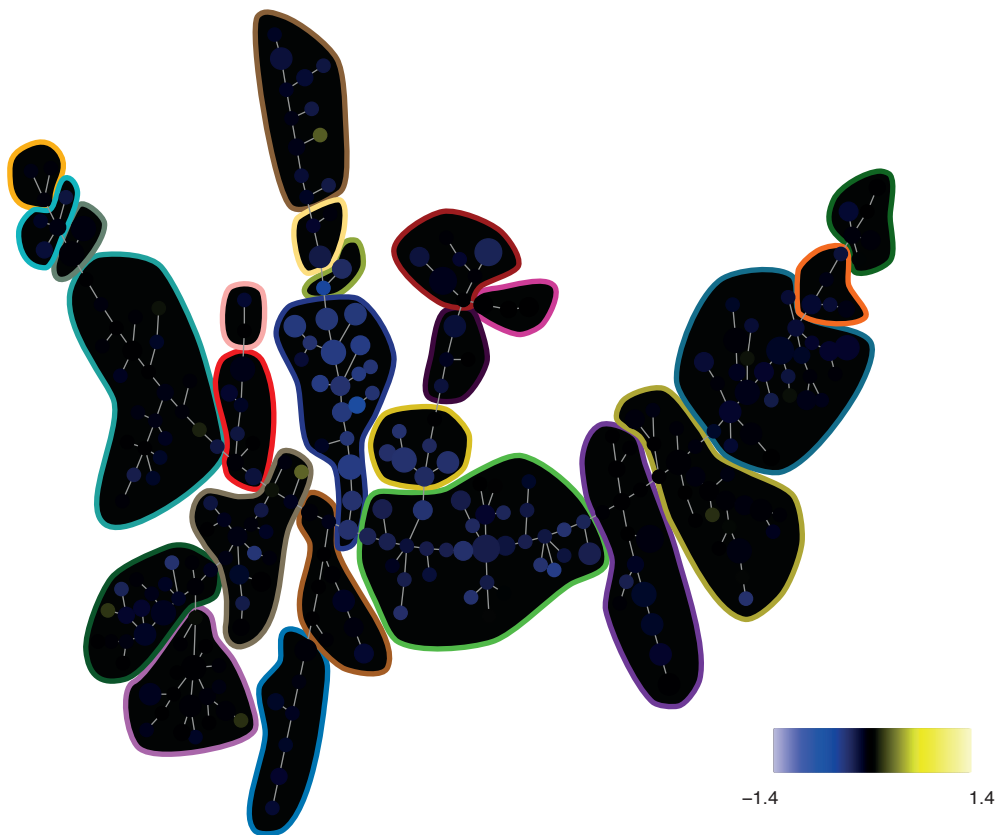

Figure S9A

151-pERK1/2 ---- IL3 vs Ref Ratio

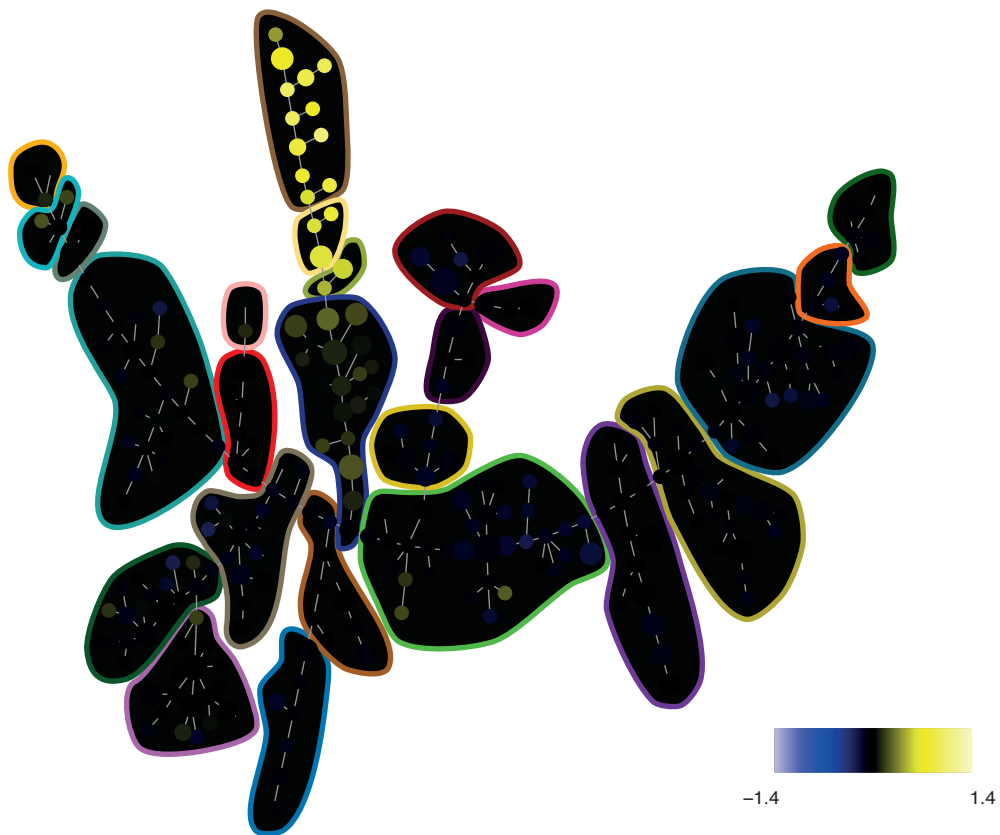

Figure S9A

151-pERK1/2 ---- IL7 vs Ref Ratio

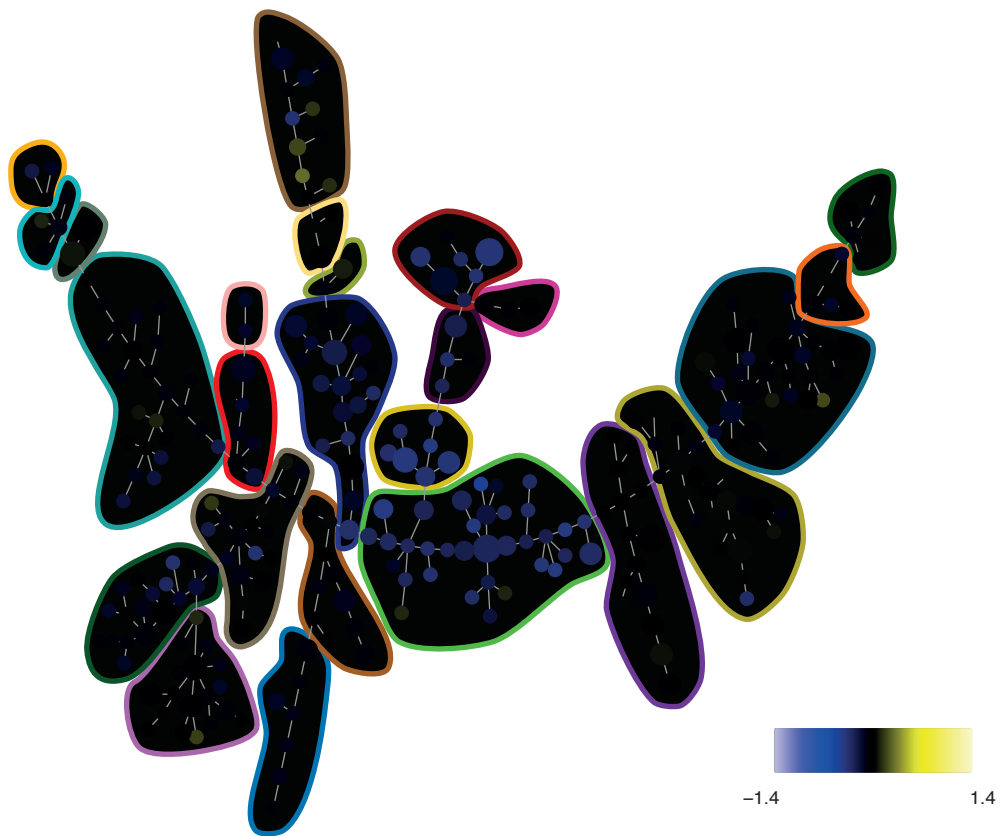



Figure S9A

151-pERK1/2 ---- LPS vs Ref Ratio

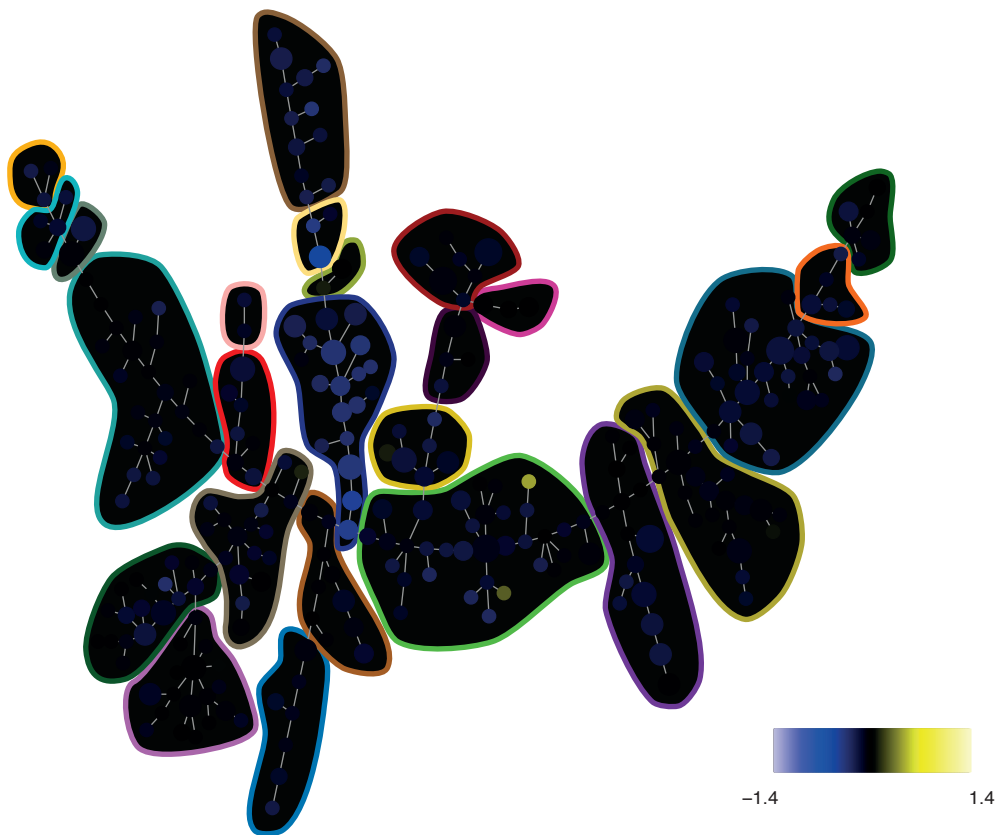

Figure S9A

151-pERK1/2 --- PMAiono vs Ref Ratio

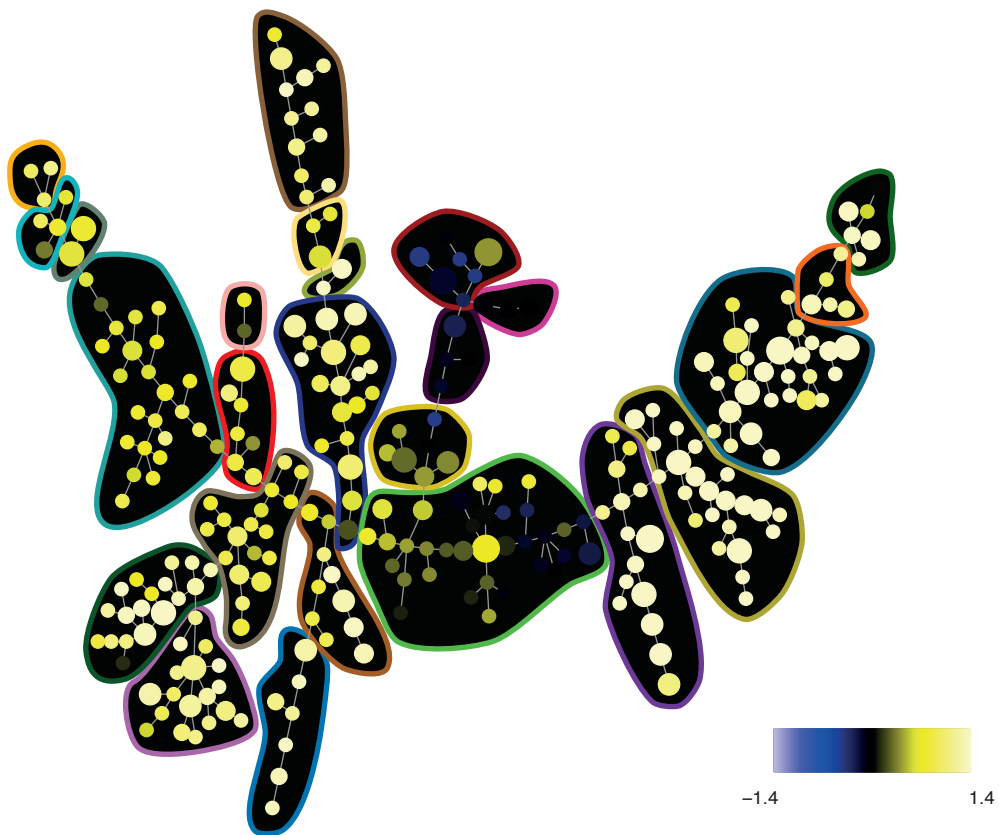

Figure S9A

151-pERK1/2 ---- PVO4 vs Ref Ratio

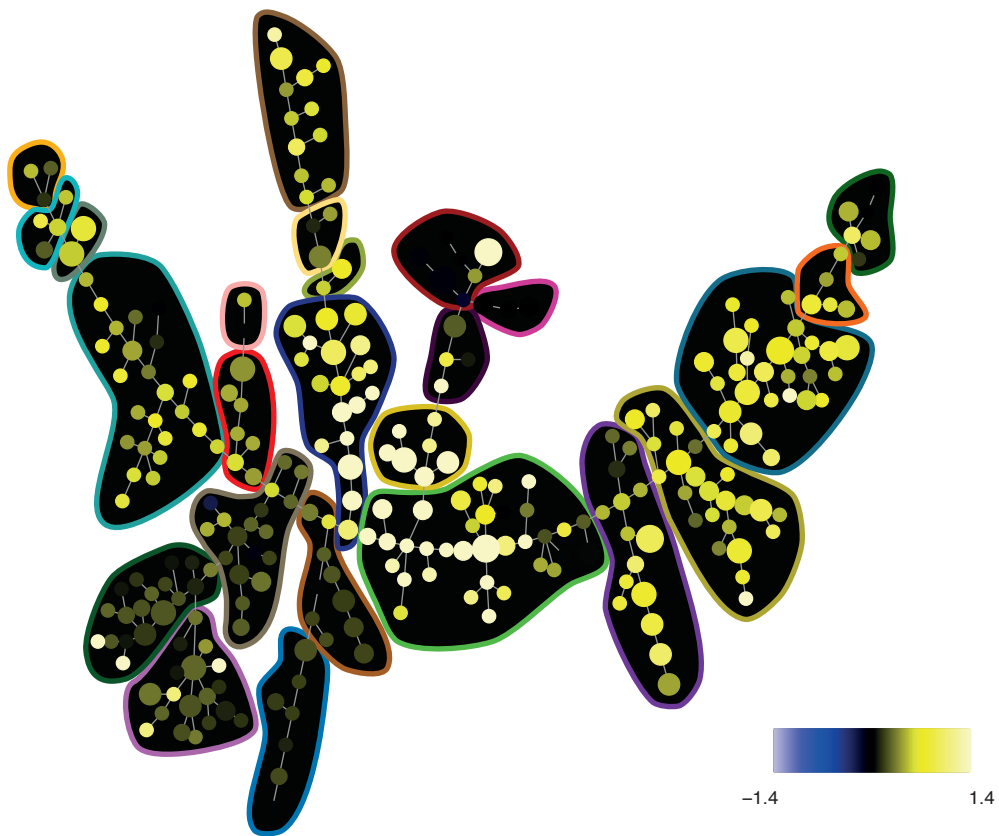

Figure S9A

151-pERK1/2 ---- SCF vs Ref Ratio

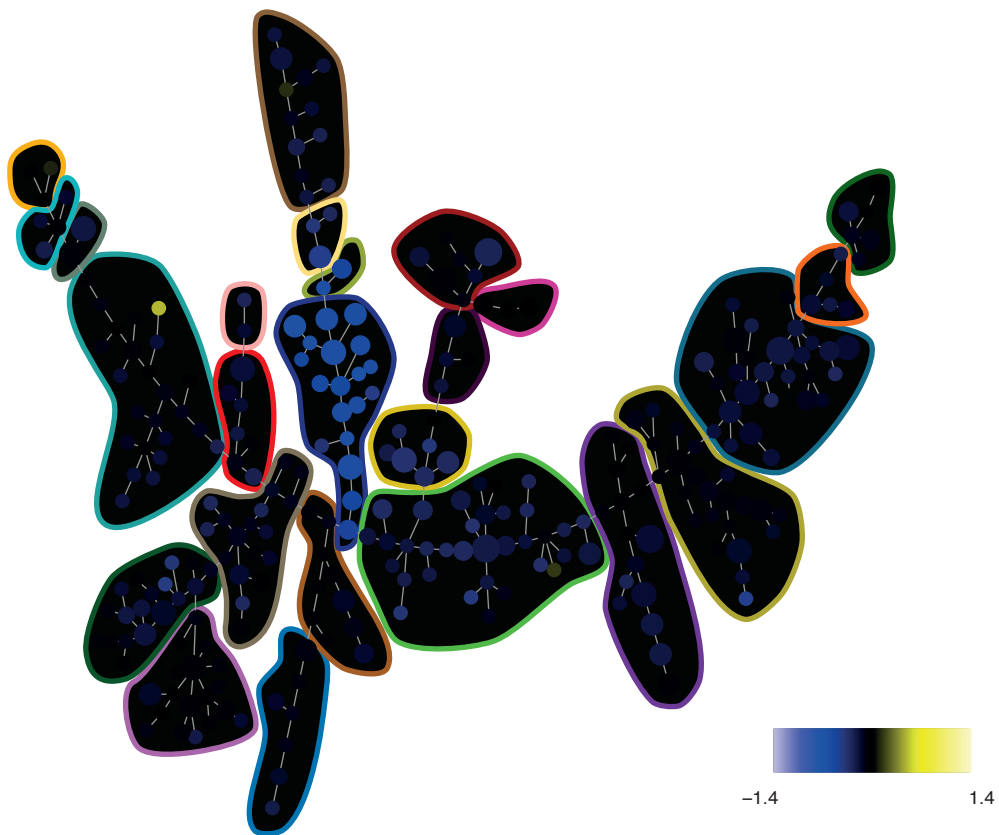

Figure S9A

151-pERK1/2 ---- TNFa vs Ref Ratio

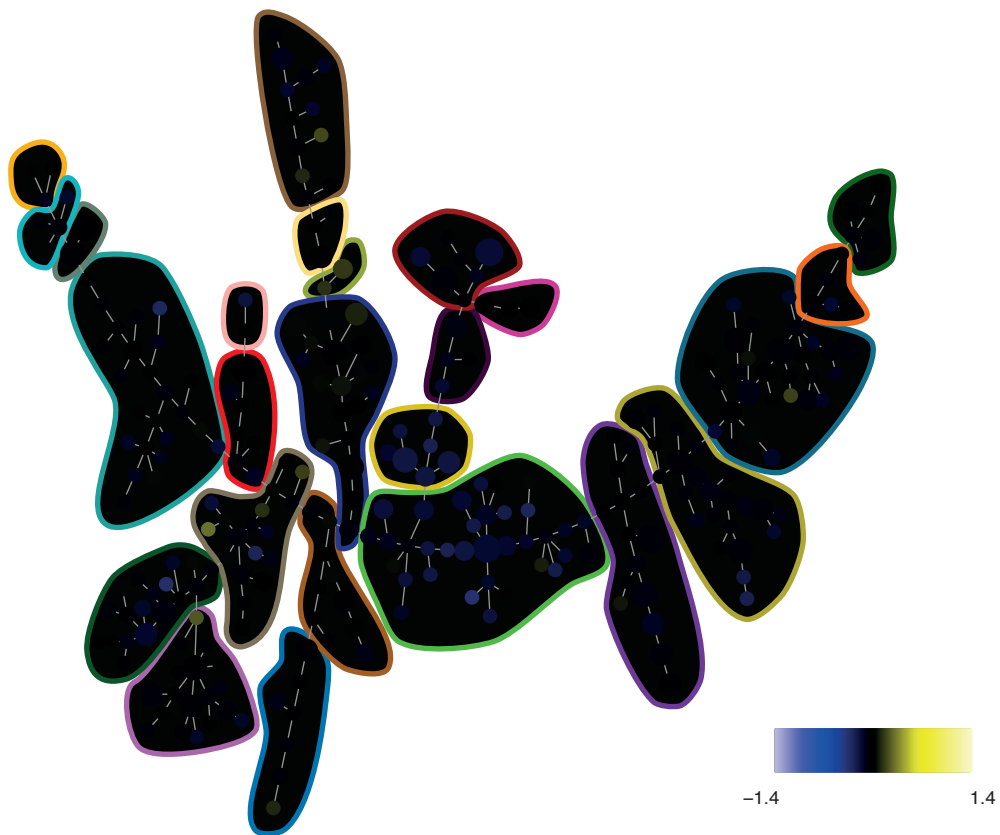

Figure S9A

151-pERK1/2 ---- TPO vs Ref Ratio

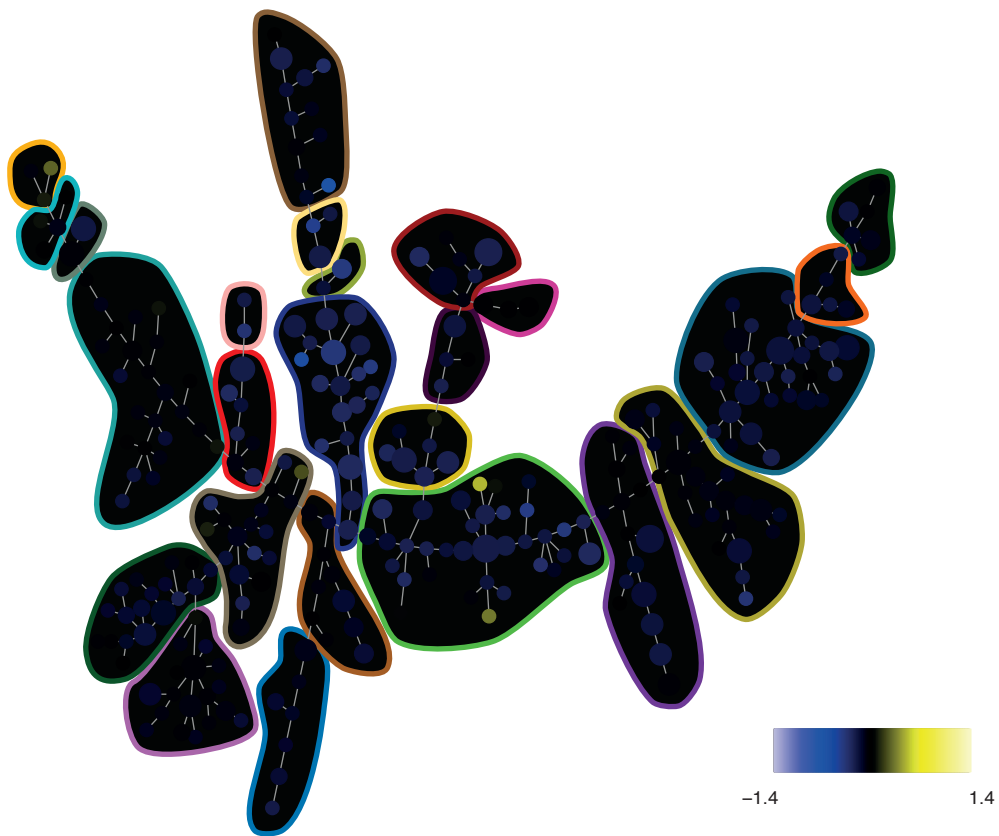

Figure S9A

152-Ki67 ---- BCR vs Ref Ratio

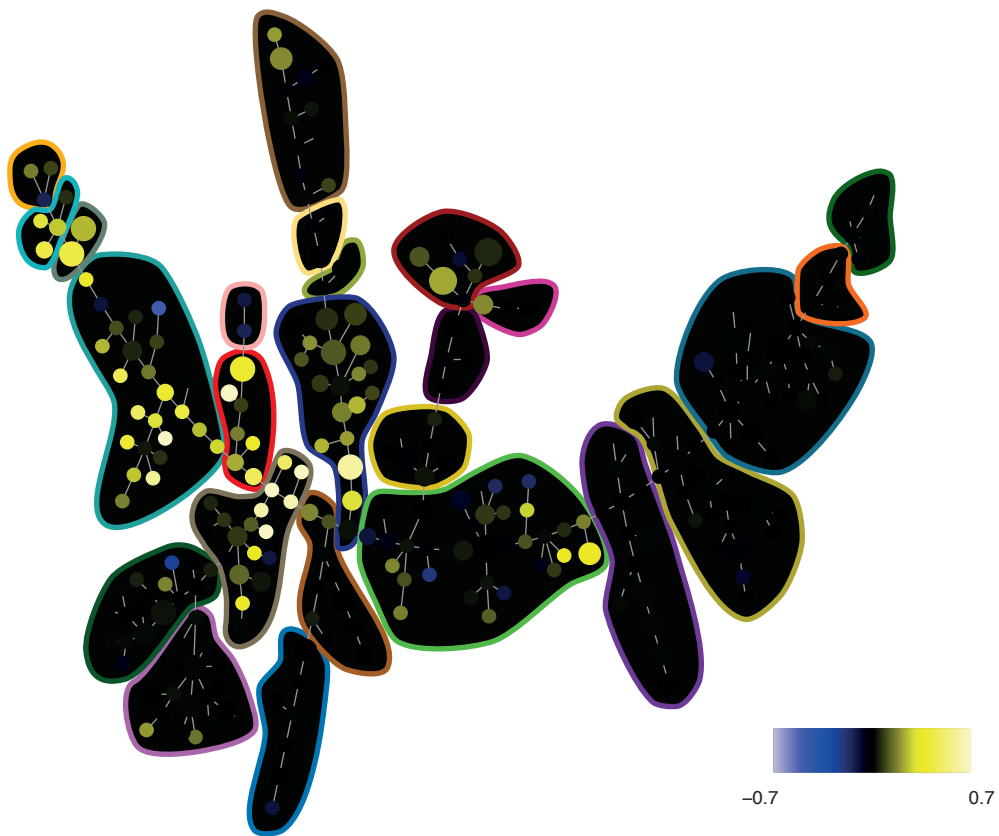

Figure S9A

152-Ki67 ---- DMSO vs Ref Ratio

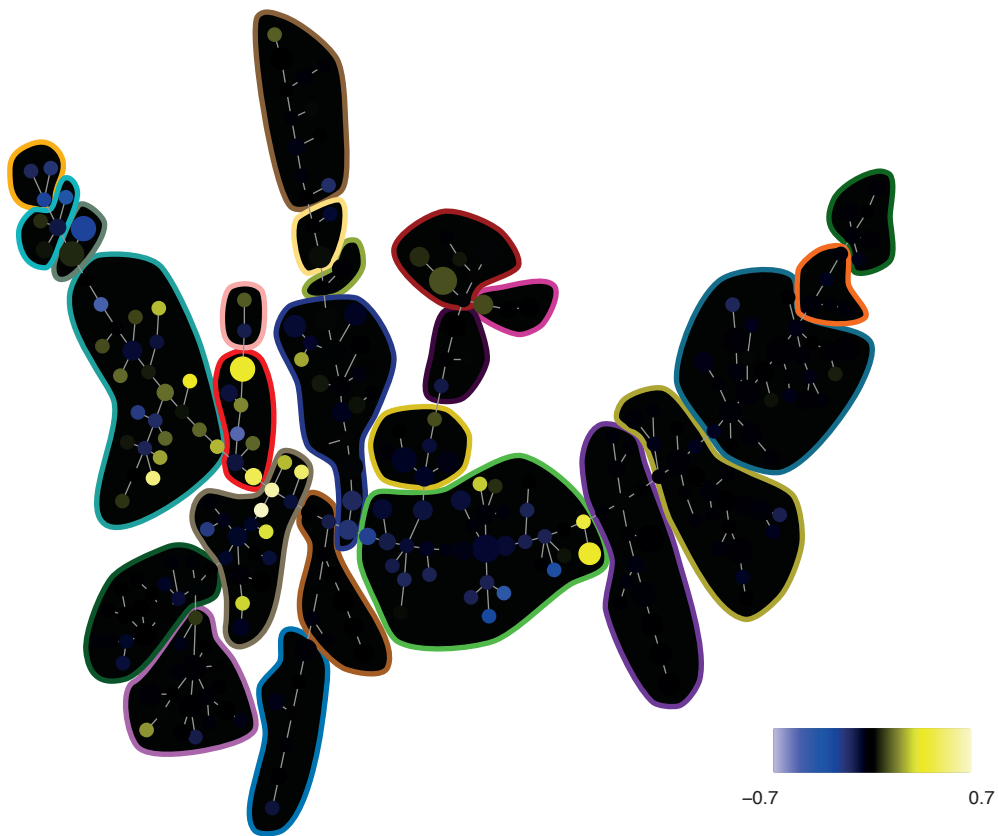



Figure S9A

152-Ki67 ---- Flt3L vs Ref Ratio

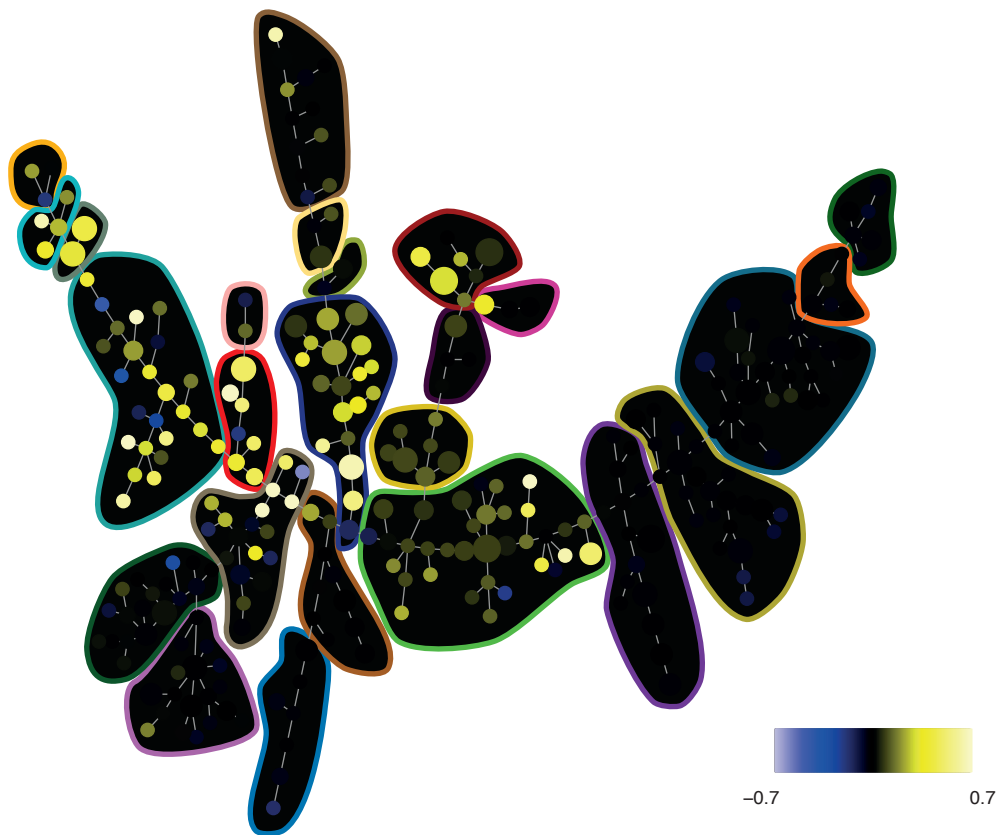

Figure S9A

152-Ki67 ---- GCSF vs Ref Ratio

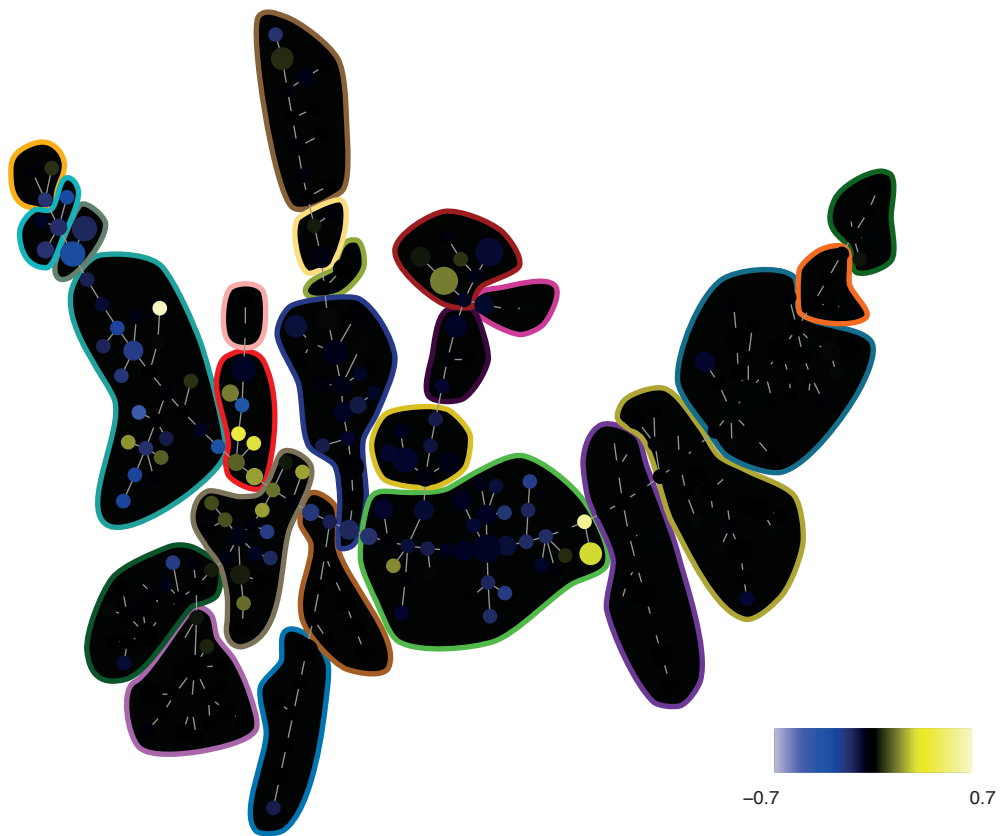

Figure S9A

152-Ki67 ---- GMCSF vs Ref Ratio

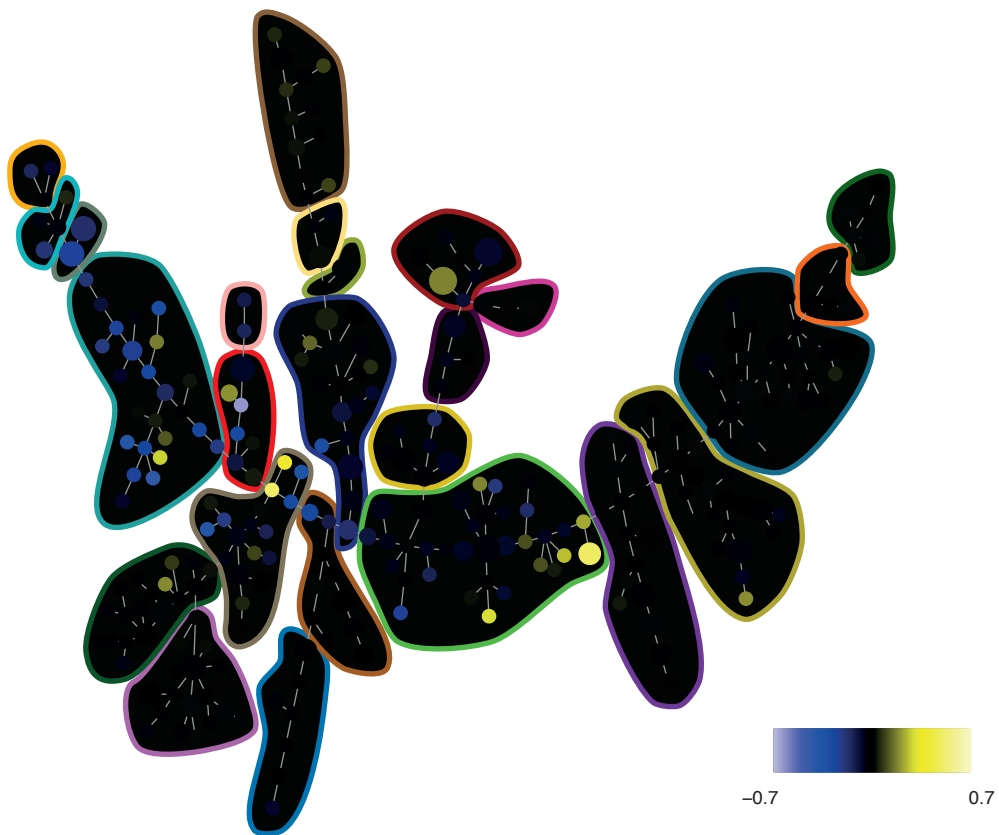

Figure S9A

152-Ki67 ---- IFNad vs Ref Ratio

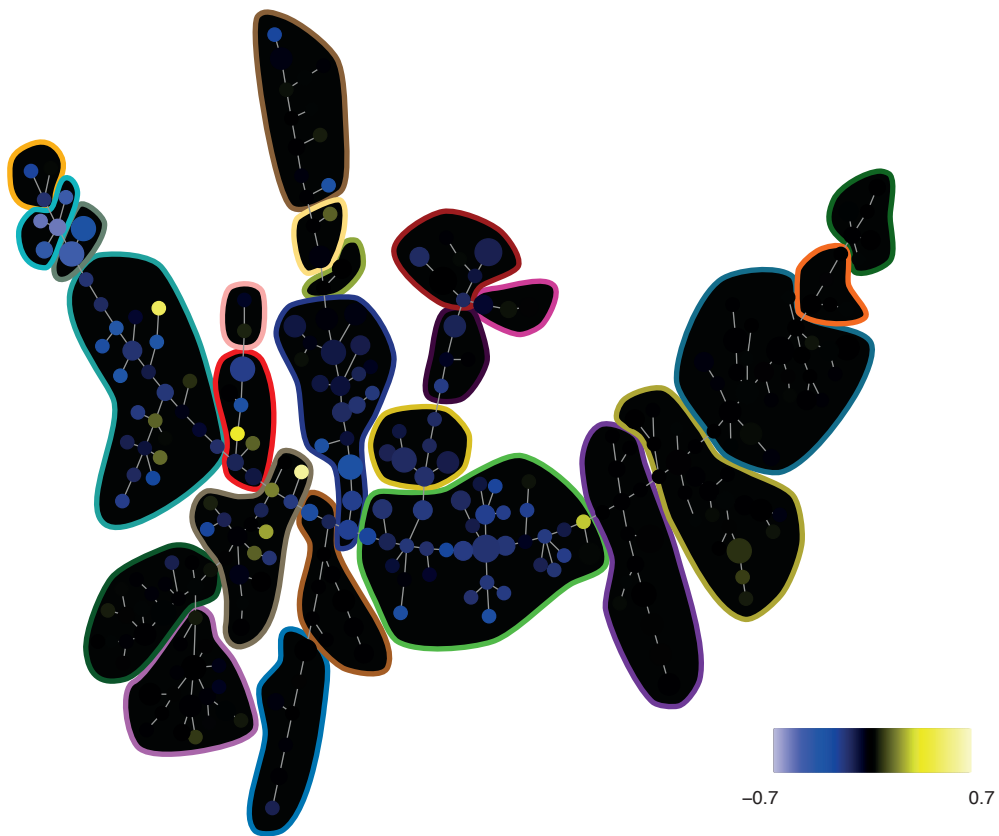

Figure S9A

152-Ki67 ---- IL3 vs Ref Ratio

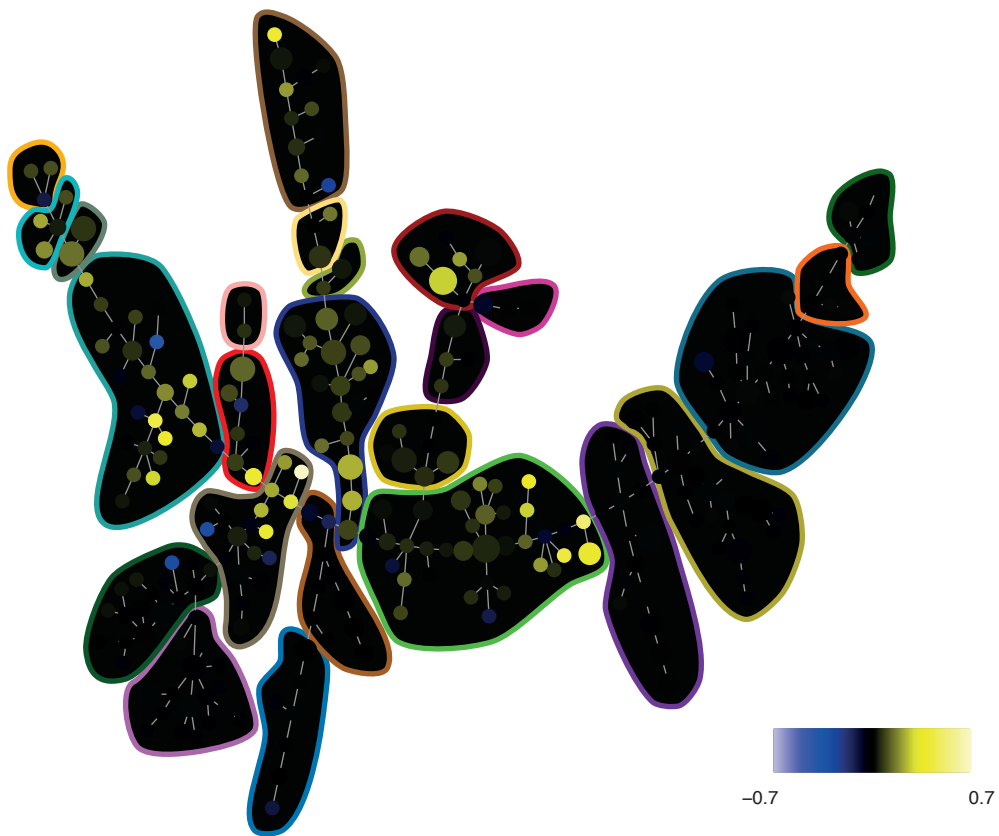

Figure S9A

152-Ki67 ---- IL7 vs Ref Ratio

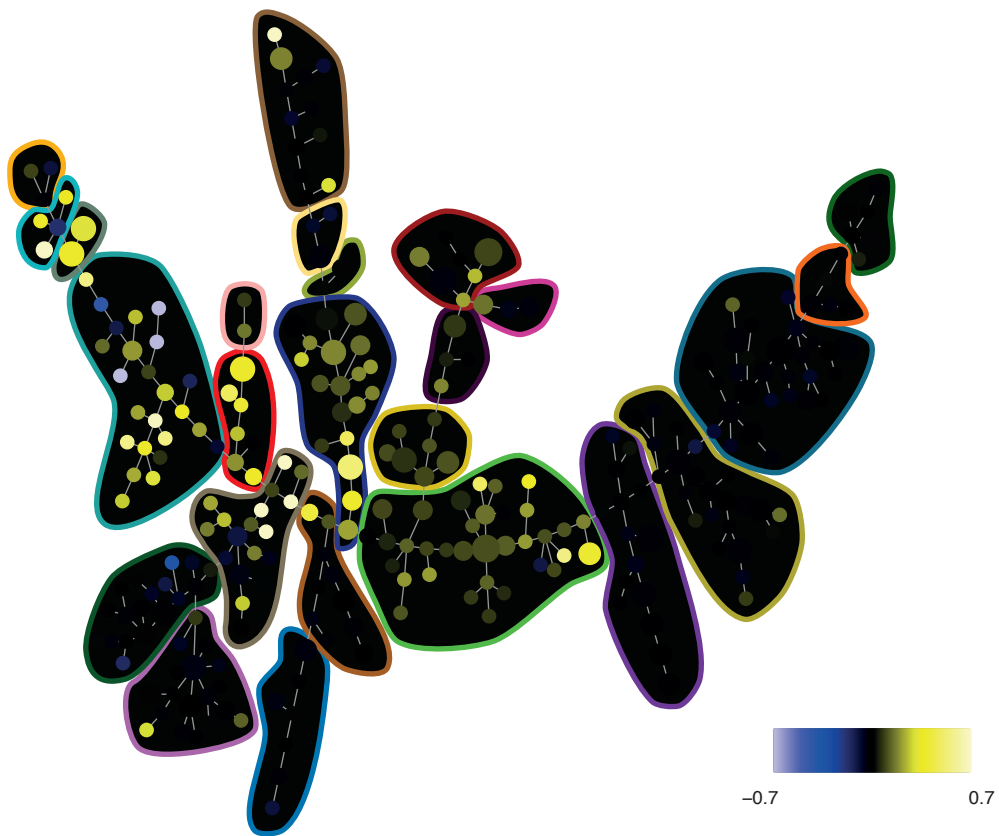

Figure S9A

152-Ki67 ---- LPS vs Ref Ratio

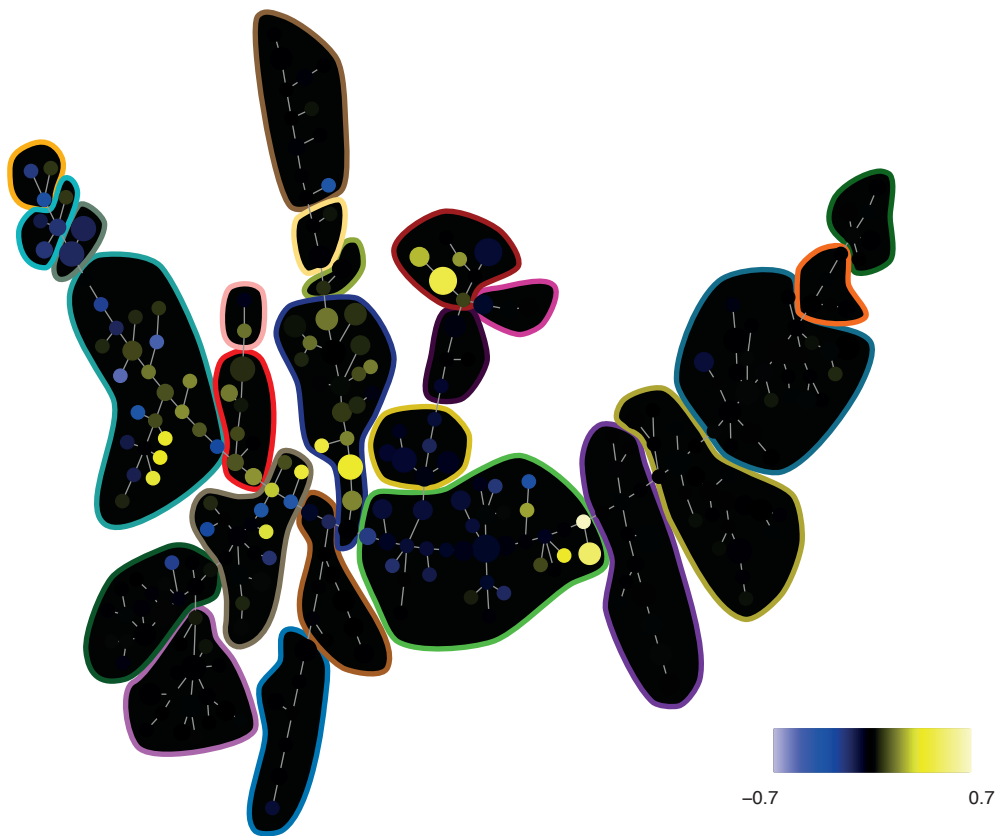

Figure S9A

152-Ki67 ---- PMAiono vs Ref Ratio

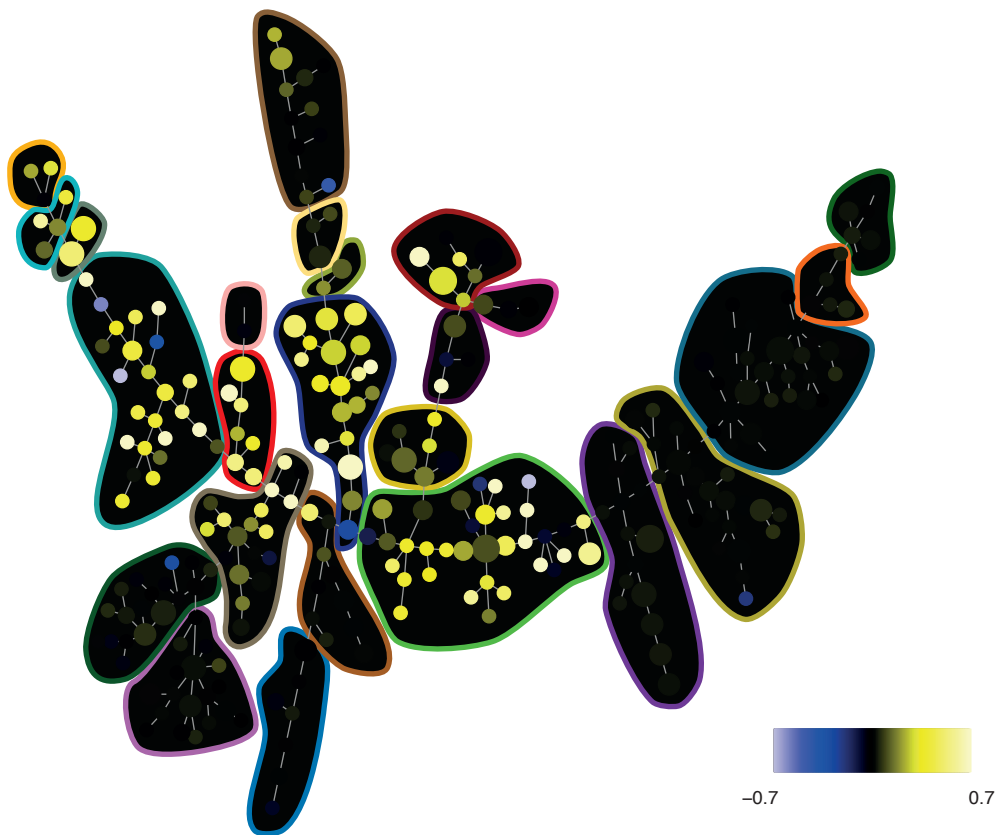



Figure S9A

152-Ki67 ---- PVO4 vs Ref Ratio

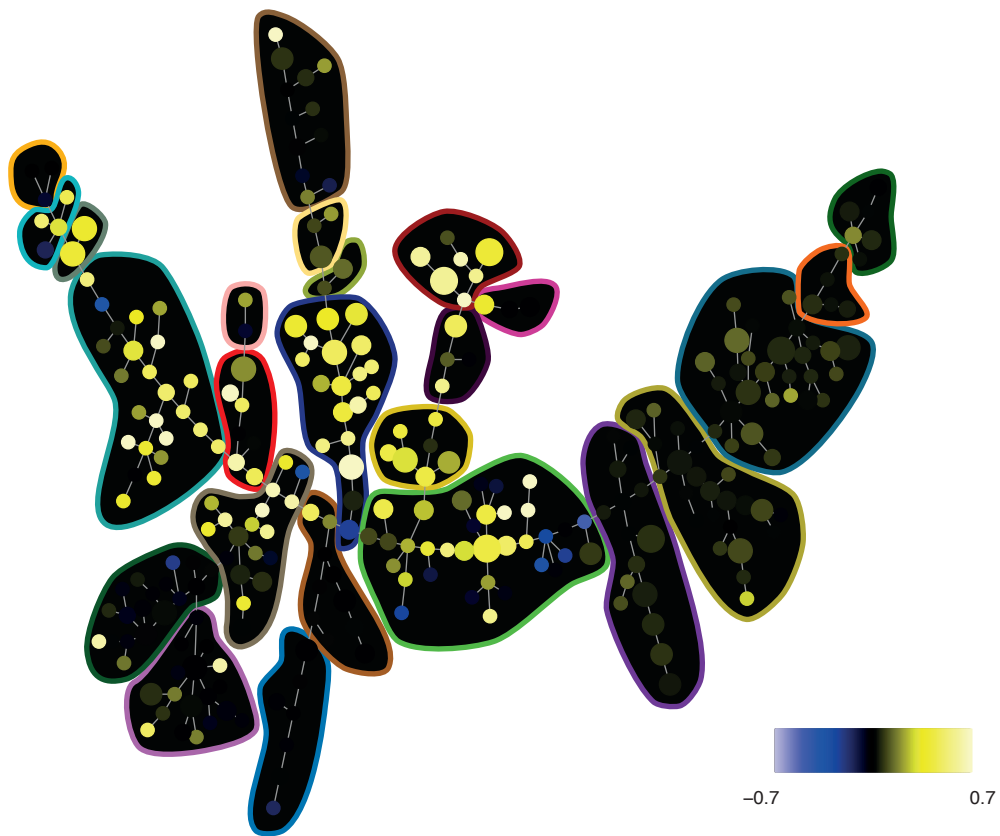

Figure S9A

152-Ki67 ---- SCF vs Ref Ratio

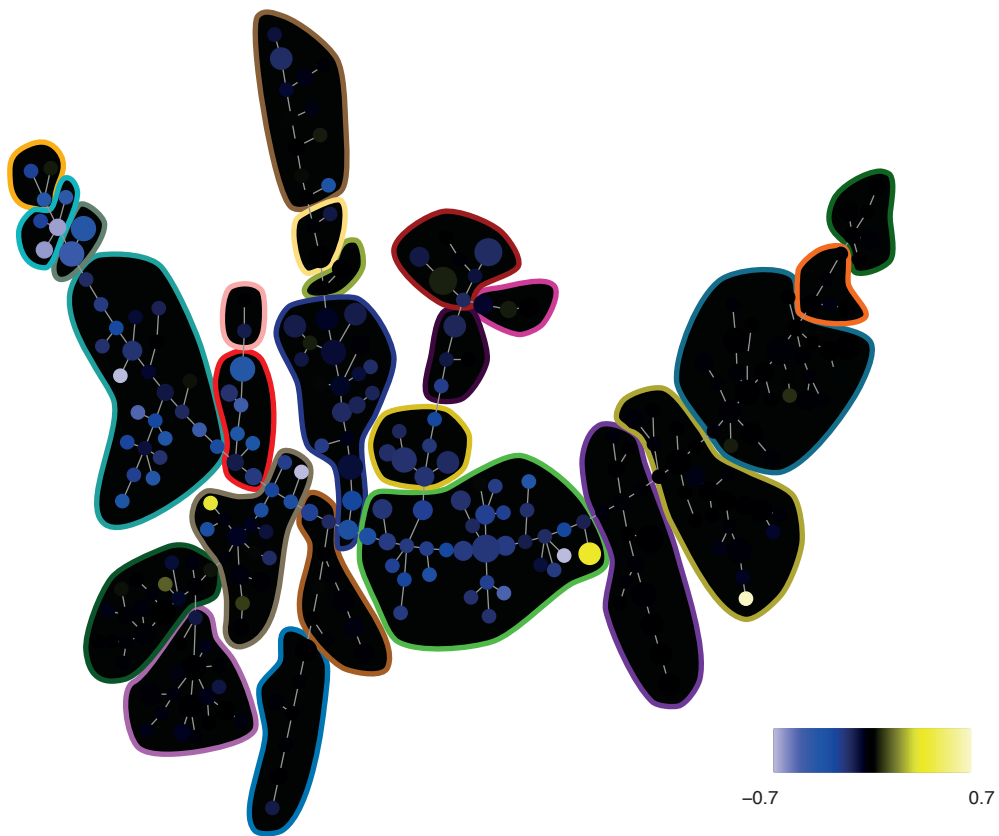

Figure S9A

152-Ki67 ---- TNFa vs Ref Ratio

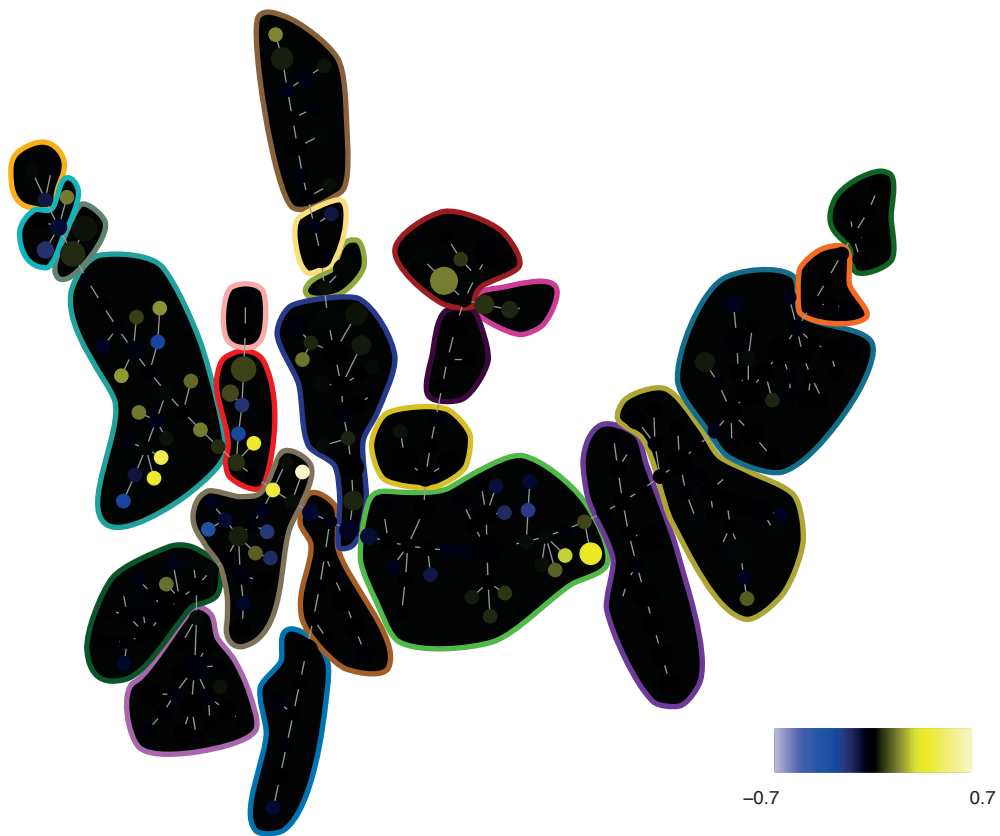

Figure S9A

152-Ki67 --- TPO vs Ref Ratio

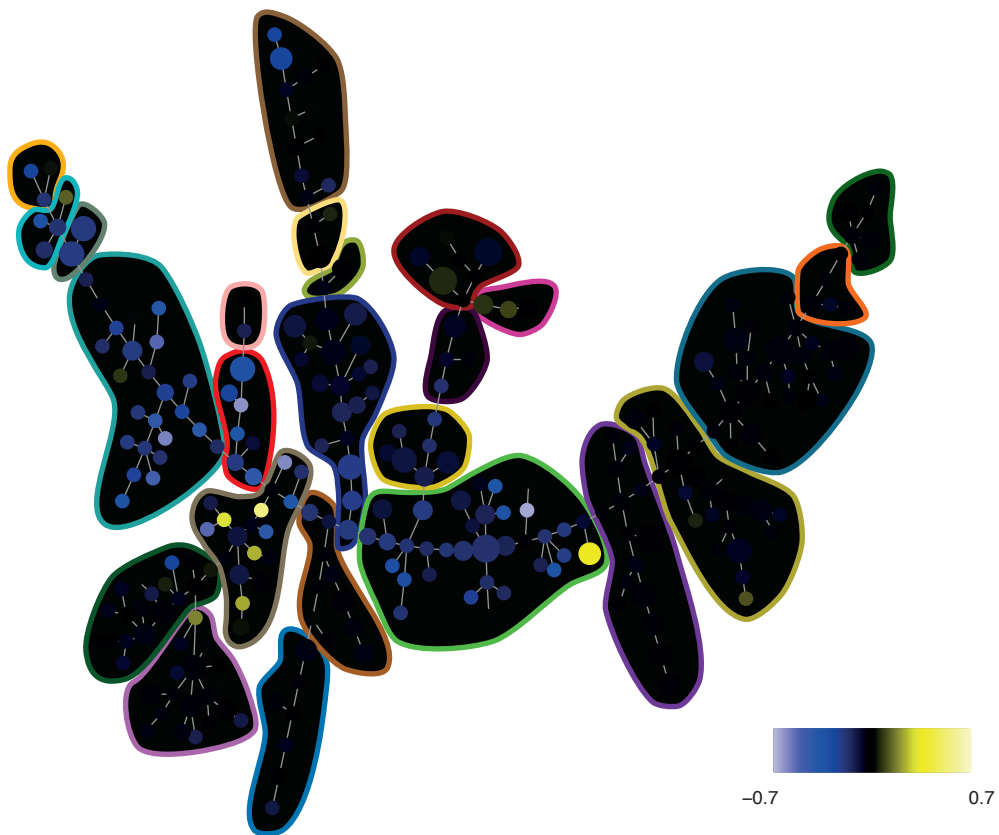

Figure S9A

153-pMAPKAPK2 ---- BCR vs Ref Ratio

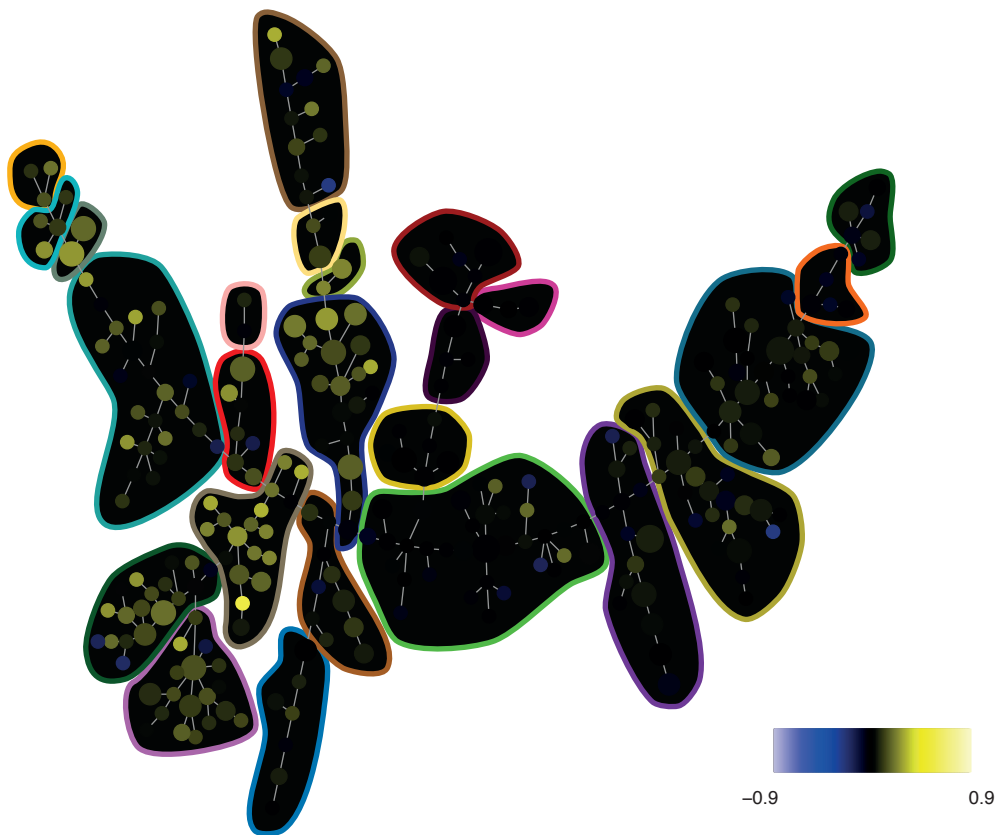

Figure S9A

153-pMAPKAPK2 ---- DMSO vs Ref Ratio

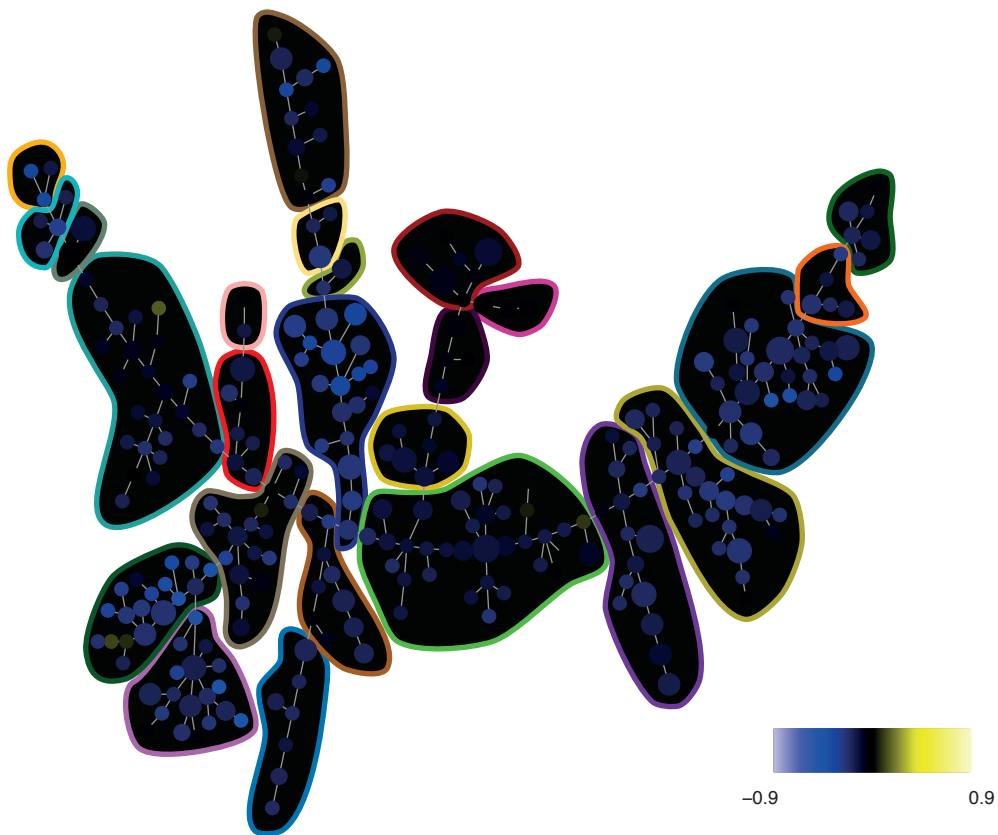

Figure S9A

153-pMAPKAPK2 ---- FIt3L vs Ref Ratio

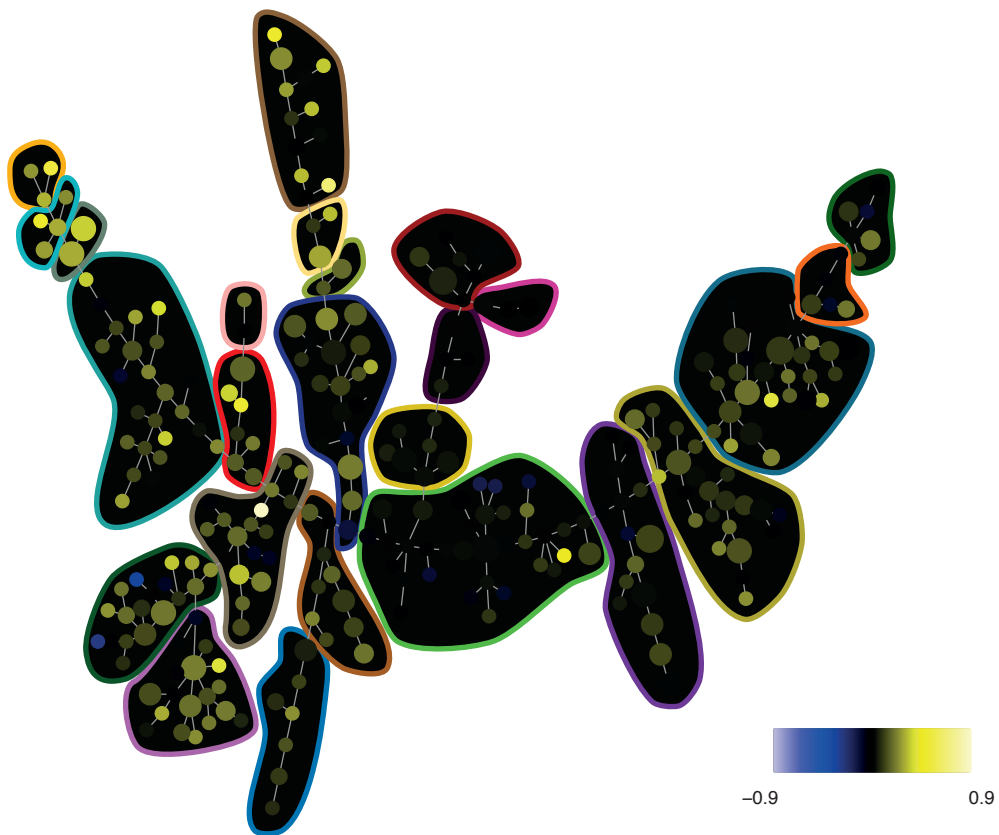

Figure S9A

153-pMAPKAPK2 --- GCSF vs Ref Ratio

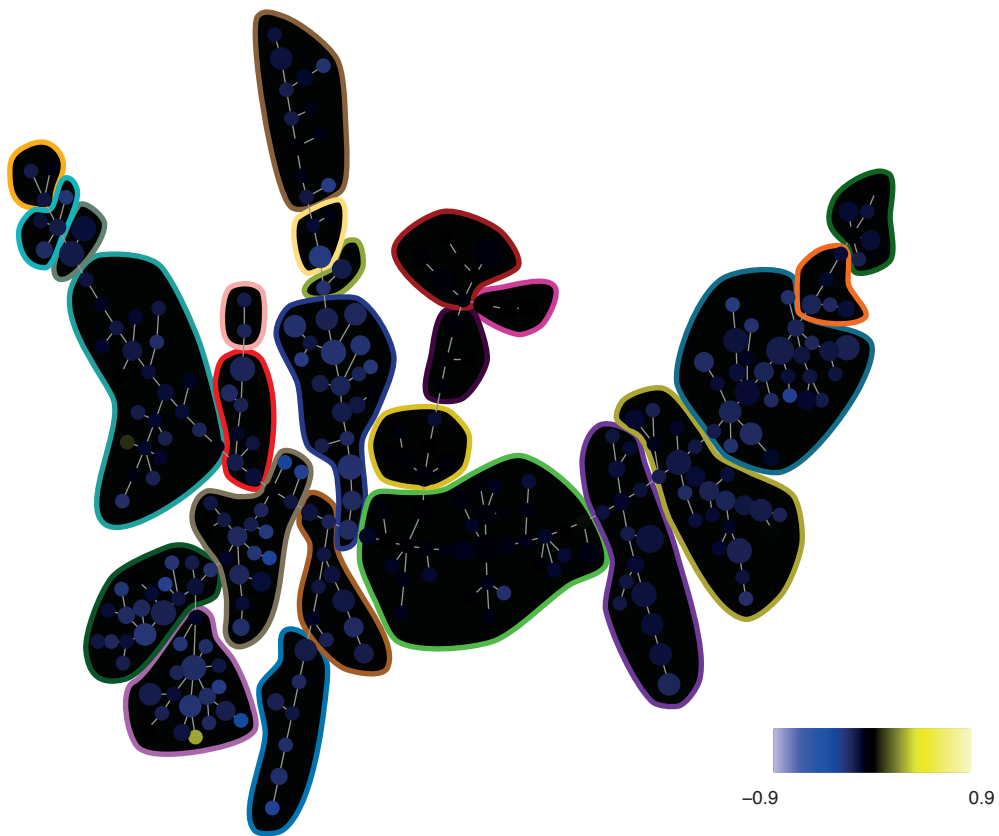



Figure S9A

153-pMAPKAPK2 --- GMCSF vs Ref Ratio

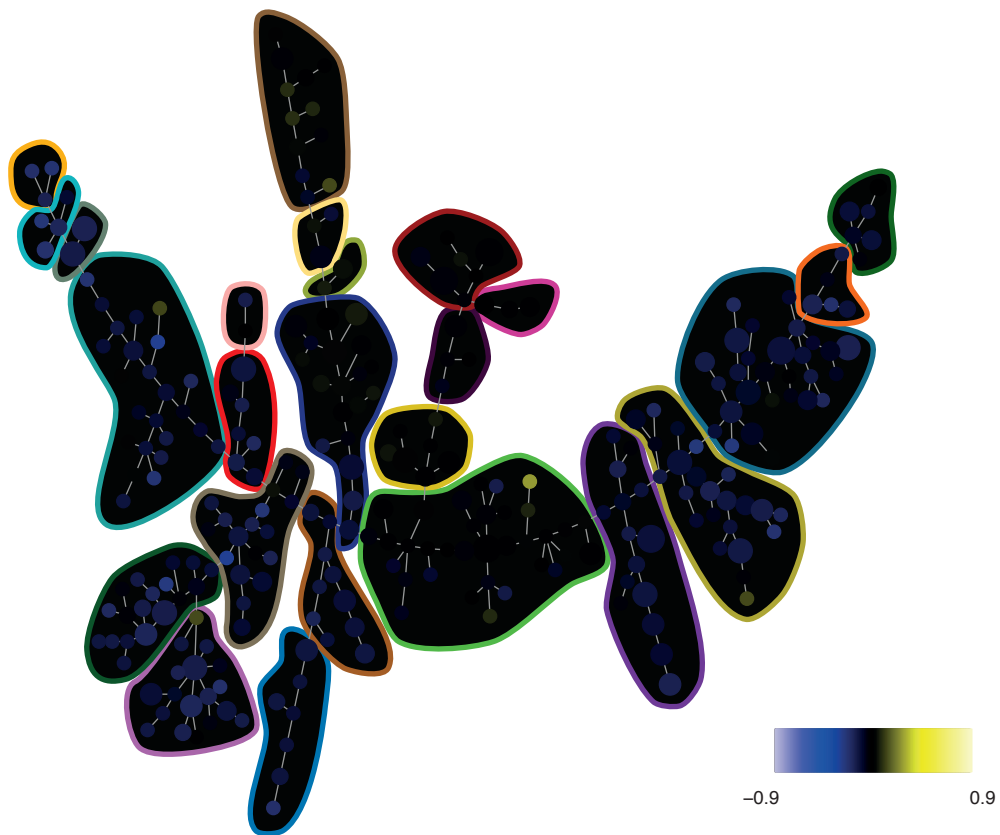

Figure S9A

153-pMAPKAPK2 ---- IFNad vs Ref Ratio

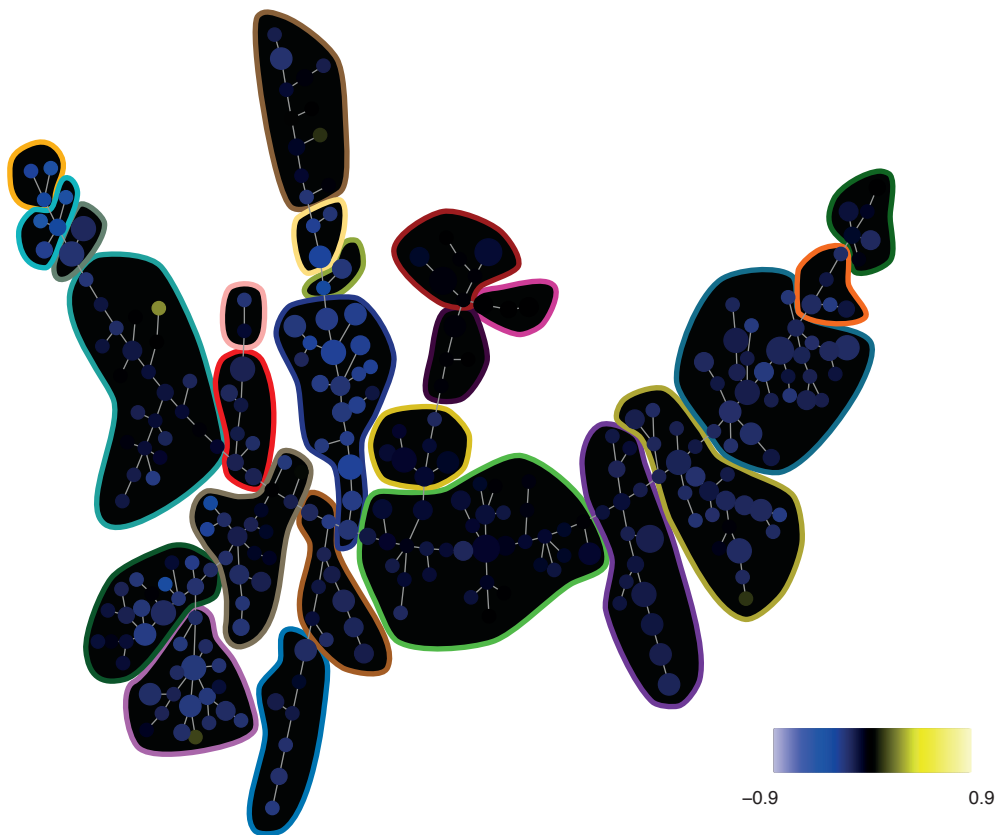

Figure S9A

153-pMAPKAPK2 ---- IL3 vs Ref Ratio

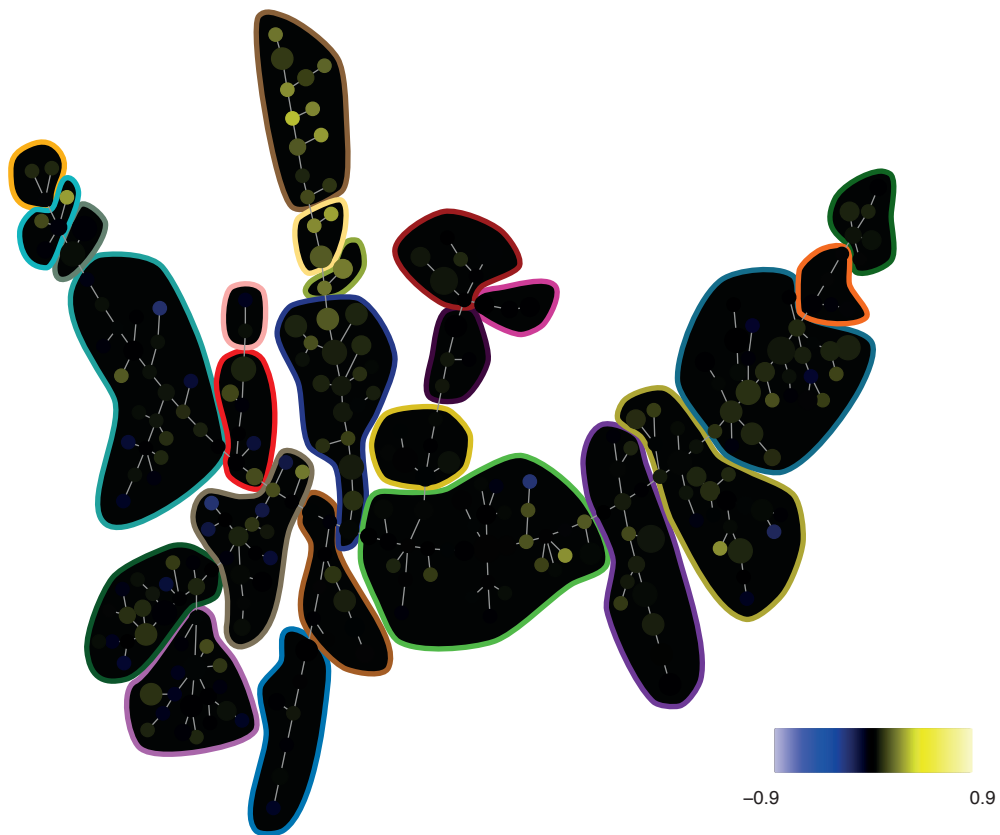

Figure S9A

153-pMAPKAPK2 ---- IL7 vs Ref Ratio

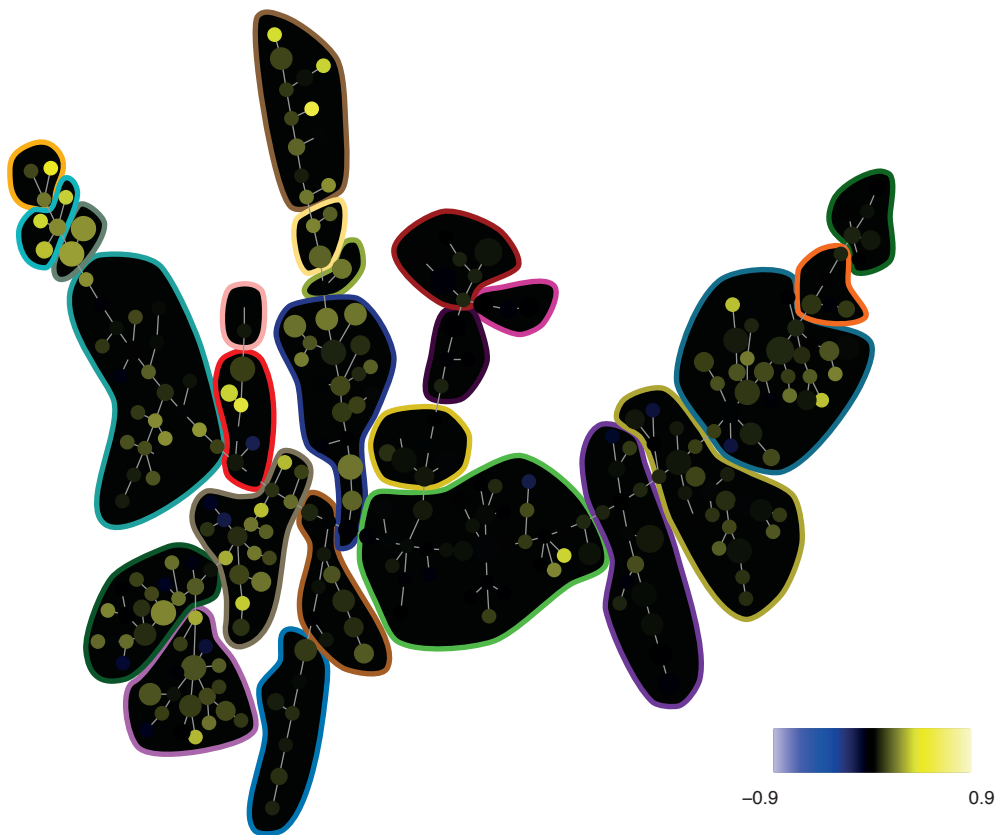

Figure S9A

153-pMAPKAPK2 ---- LPS vs Ref Ratio

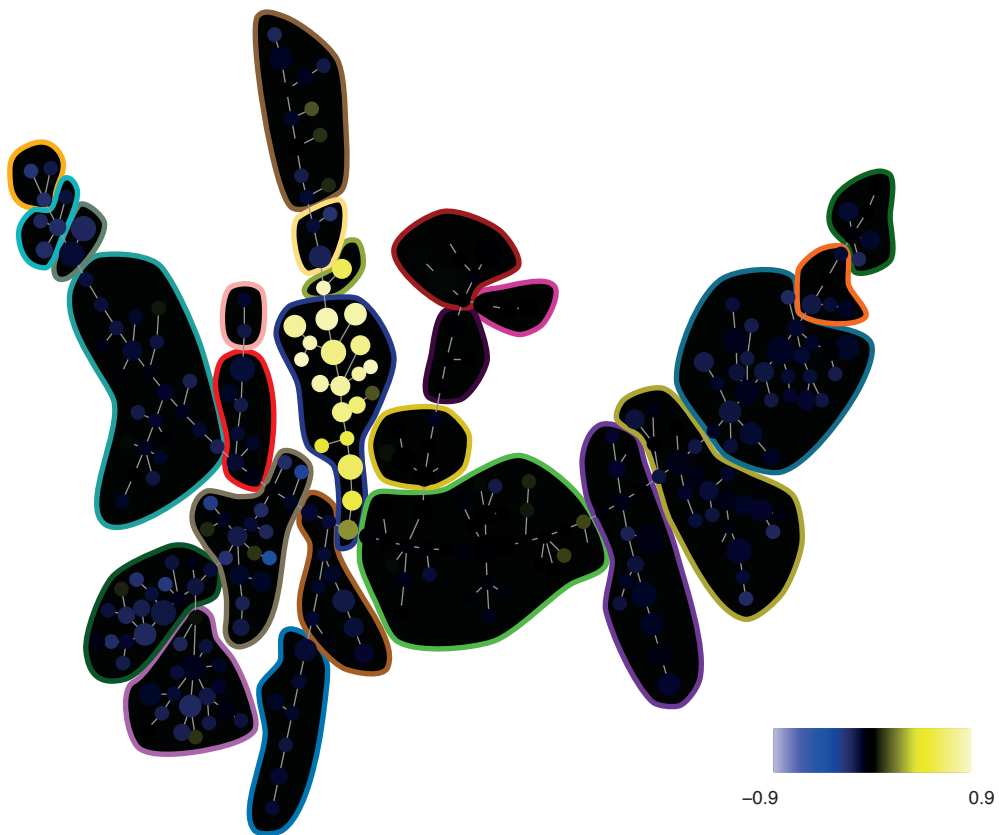

Figure S9A

153-pMAPKAPK2 ---- PMAiono vs Ref Ratio

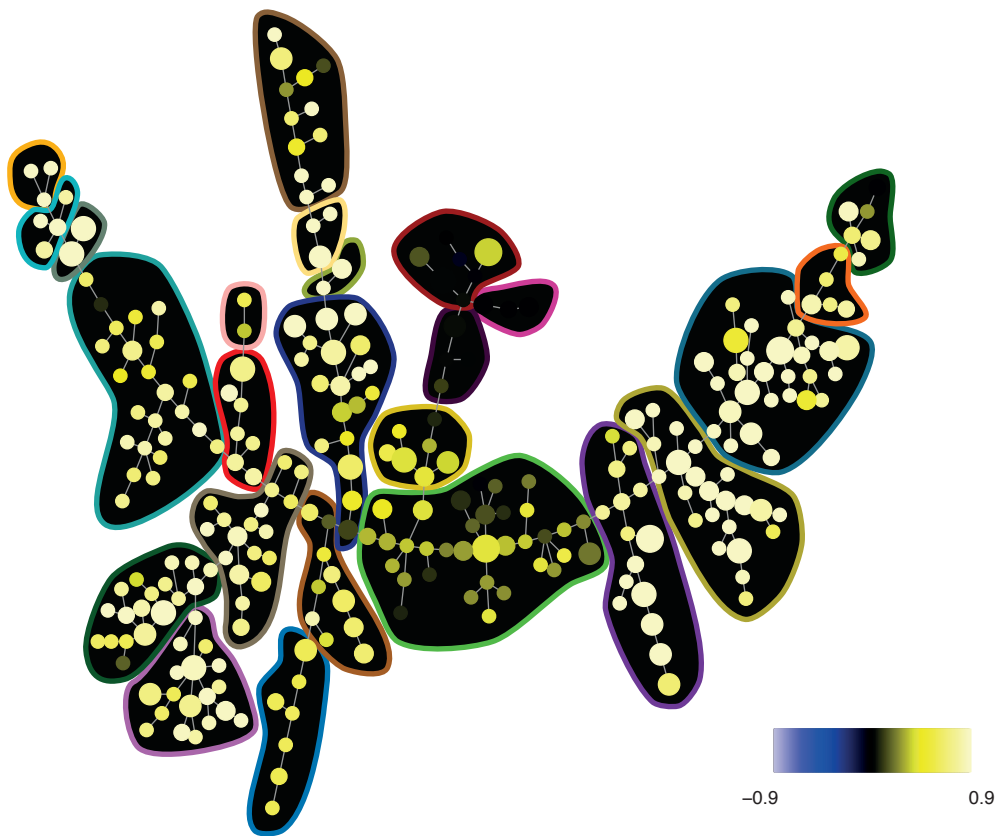

Figure S9A

153-pMAPKAPK2 ---- PVO4 vs Ref Ratio

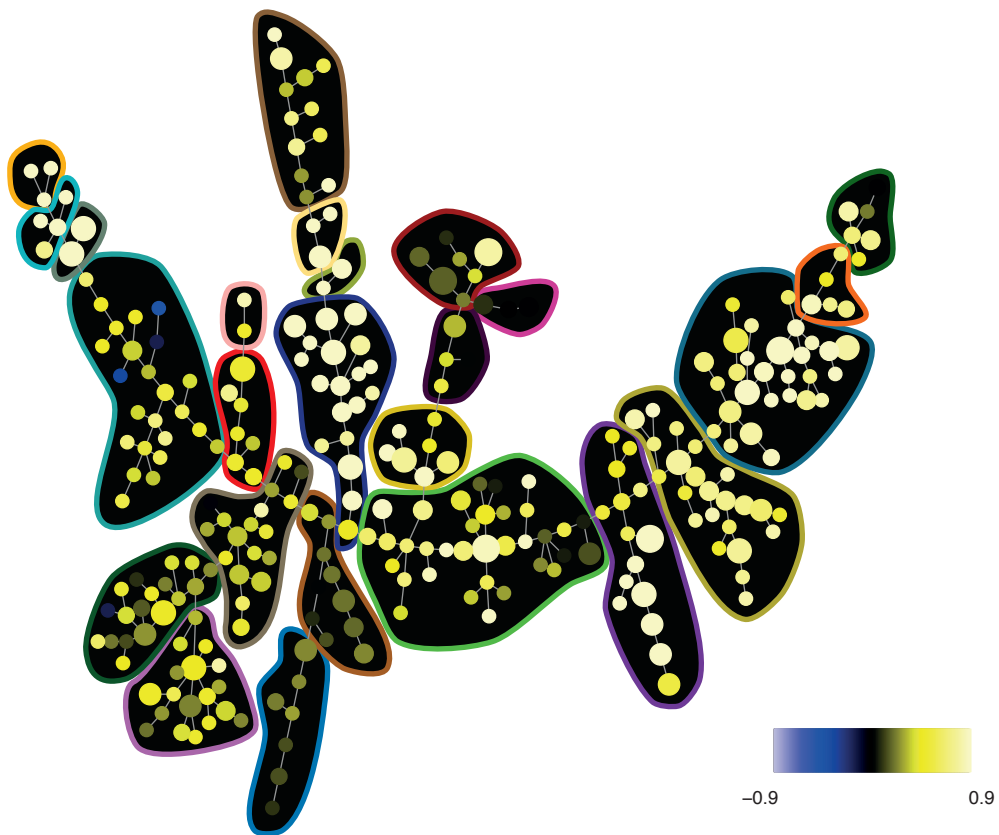

Figure S9A

153-pMAPKAPK2 ---- SCF vs Ref Ratio

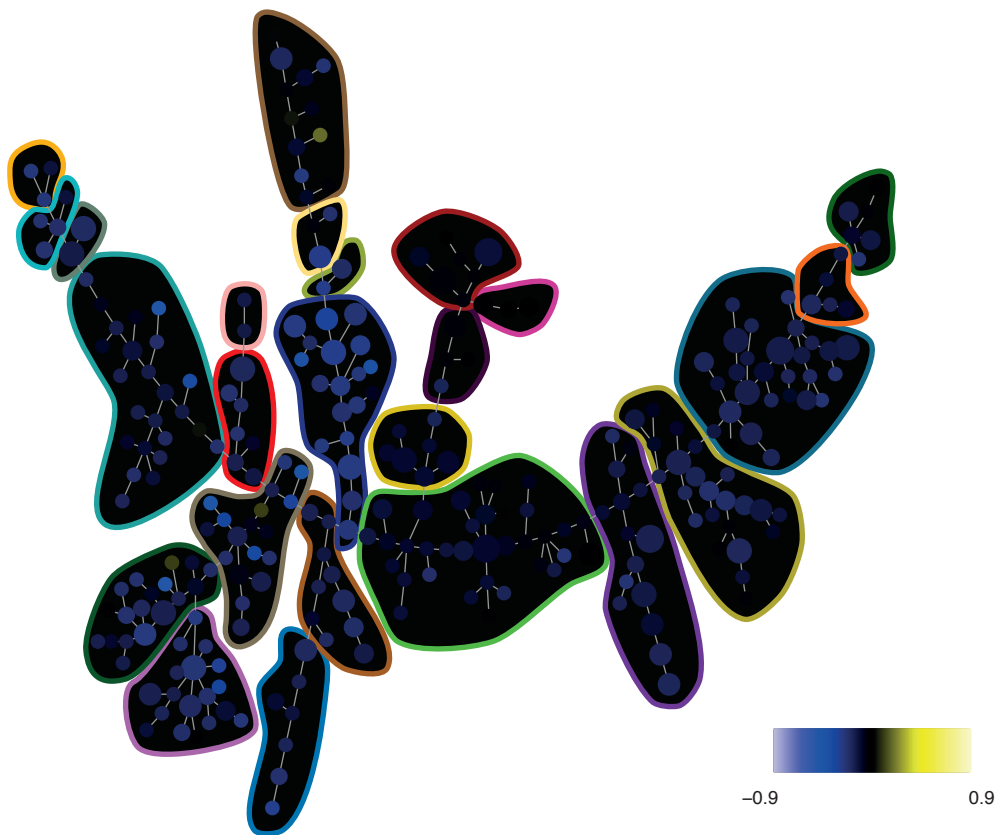



Figure S9A

153-pMAPKAPK2 ---- TNFa vs Ref Ratio

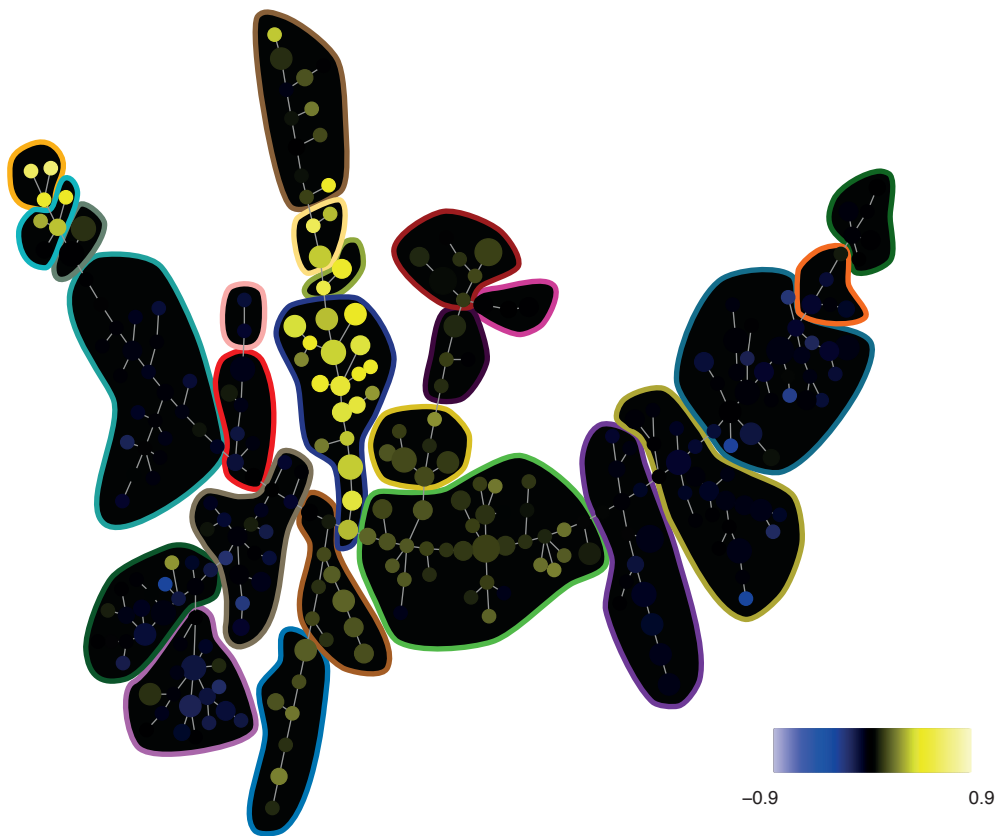

Figure S9A

153-pMAPKAPK2 ---- TPO vs Ref Ratio

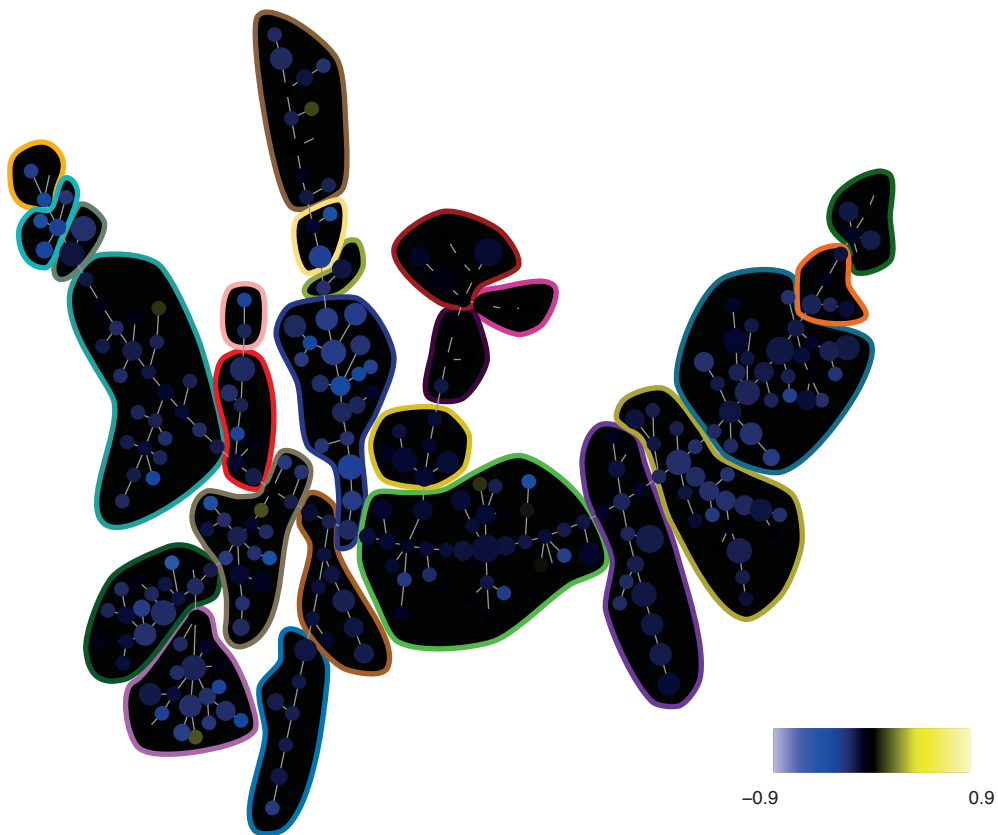

Figure S9A

154-pSHP2 --- BCR vs Ref Ratio

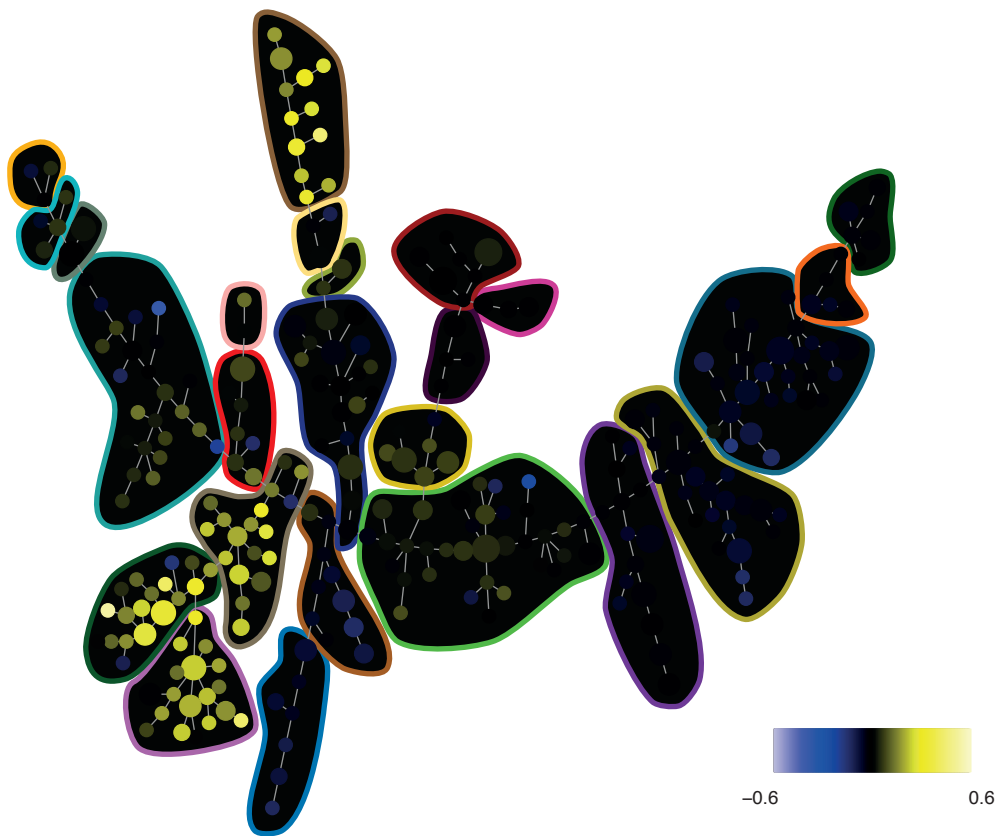

Figure S9A

154-pSHP2 --- DMSO vs Ref Ratio

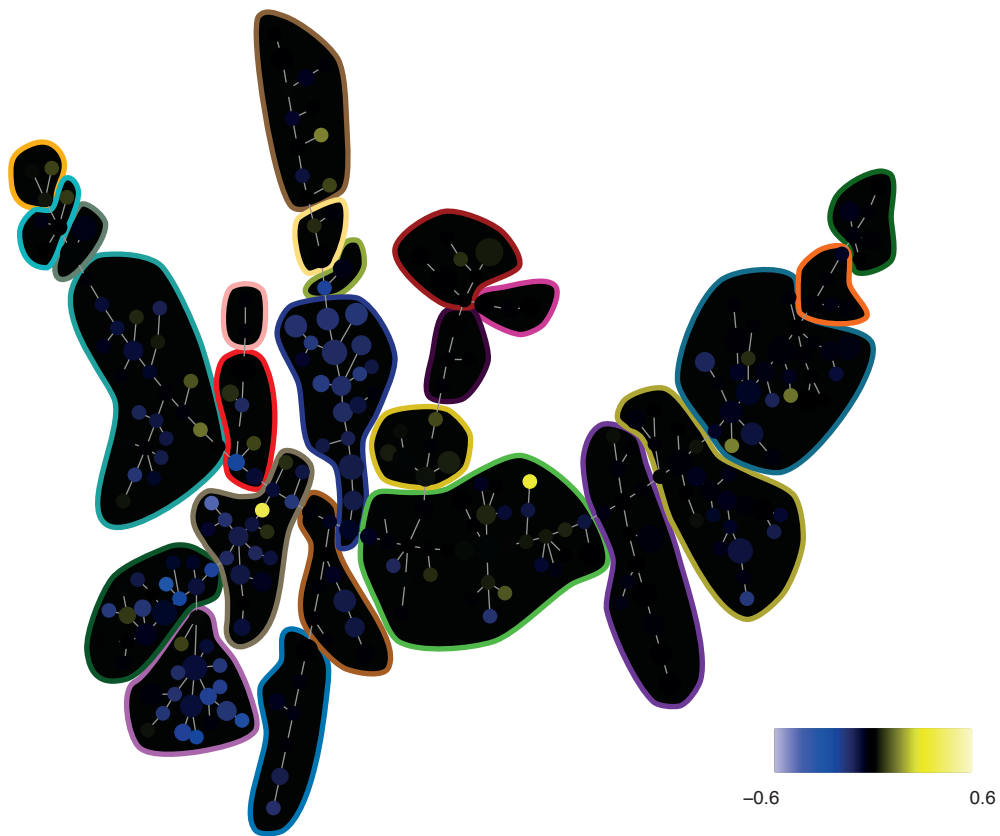

Figure S9A

154-pSHP2 --- Flt3L vs Ref Ratio

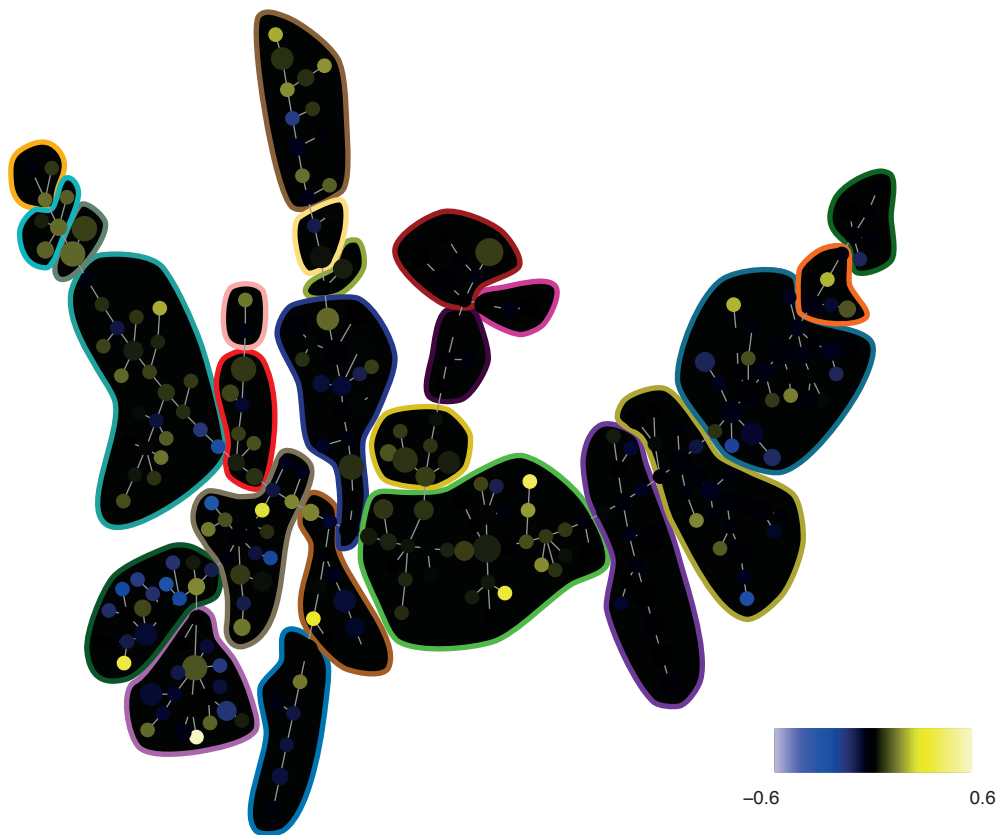

Figure S9A

154-pSHP2 ---- GCSF vs Ref Ratio

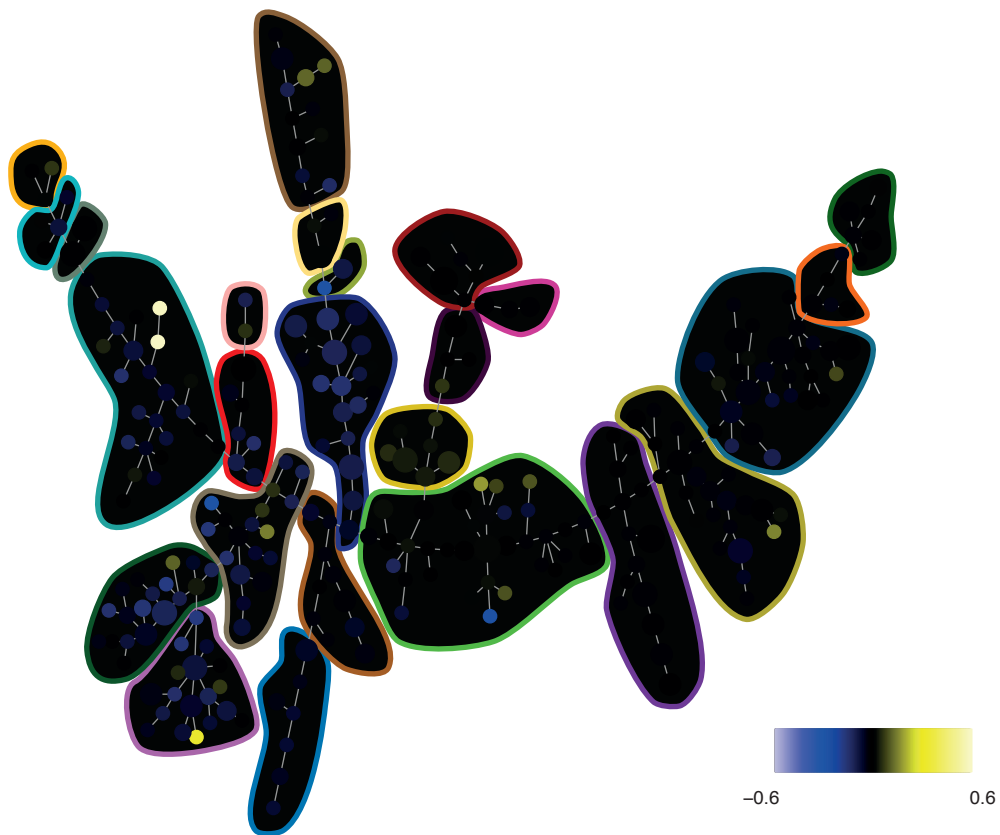

Figure S9A

154-pSHP2 — GMCSF vs Ref Ratio

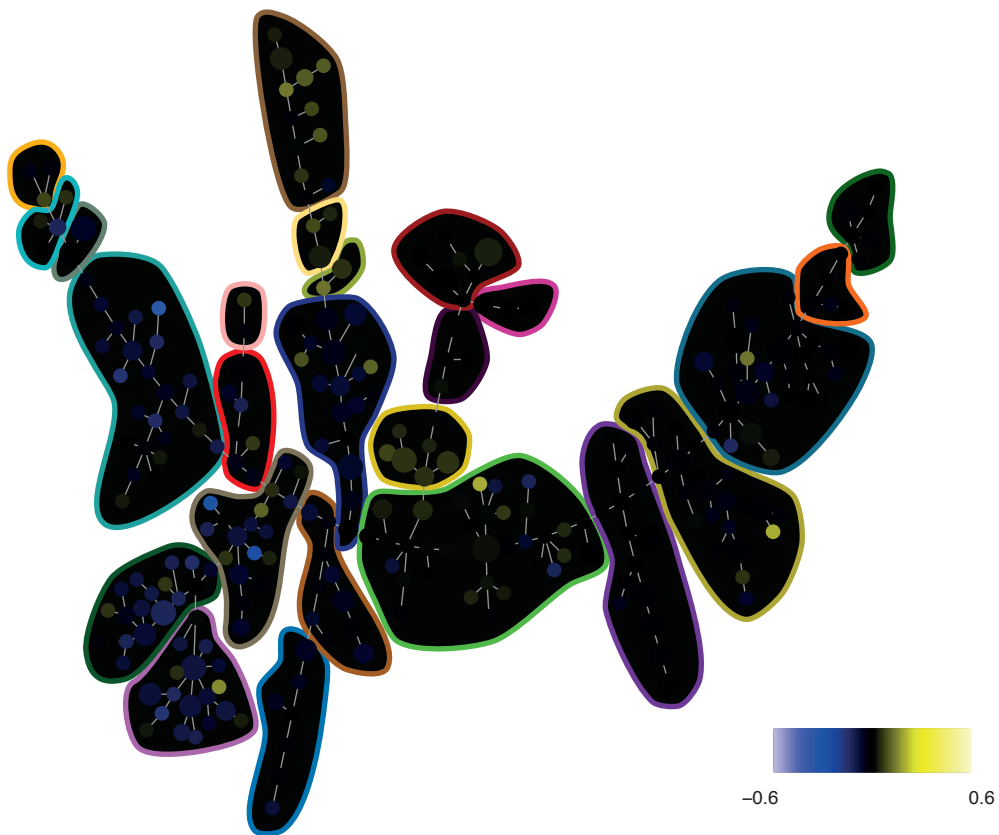

Figure S9A

154-pSHP2 --- IFNad vs Ref Ratio

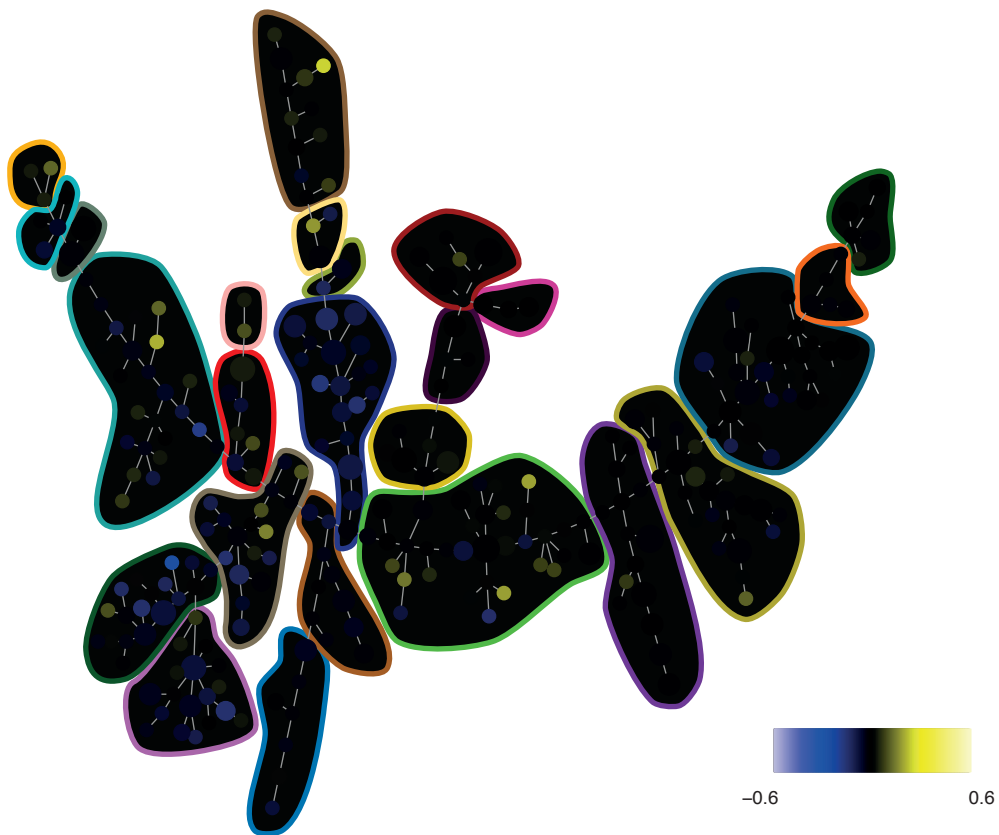



Figure S9A

154-pSHP2 ---- IL3 vs Ref Ratio

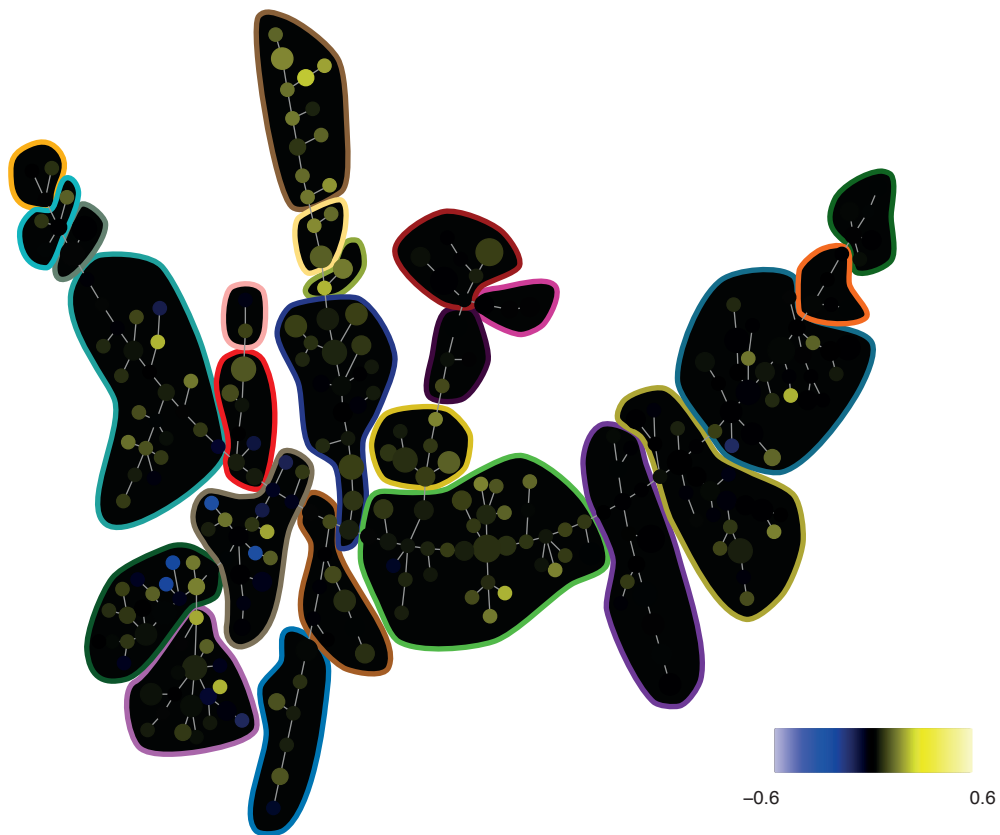

Figure S9A

154-pSHP2 ---- IL7 vs Ref Ratio

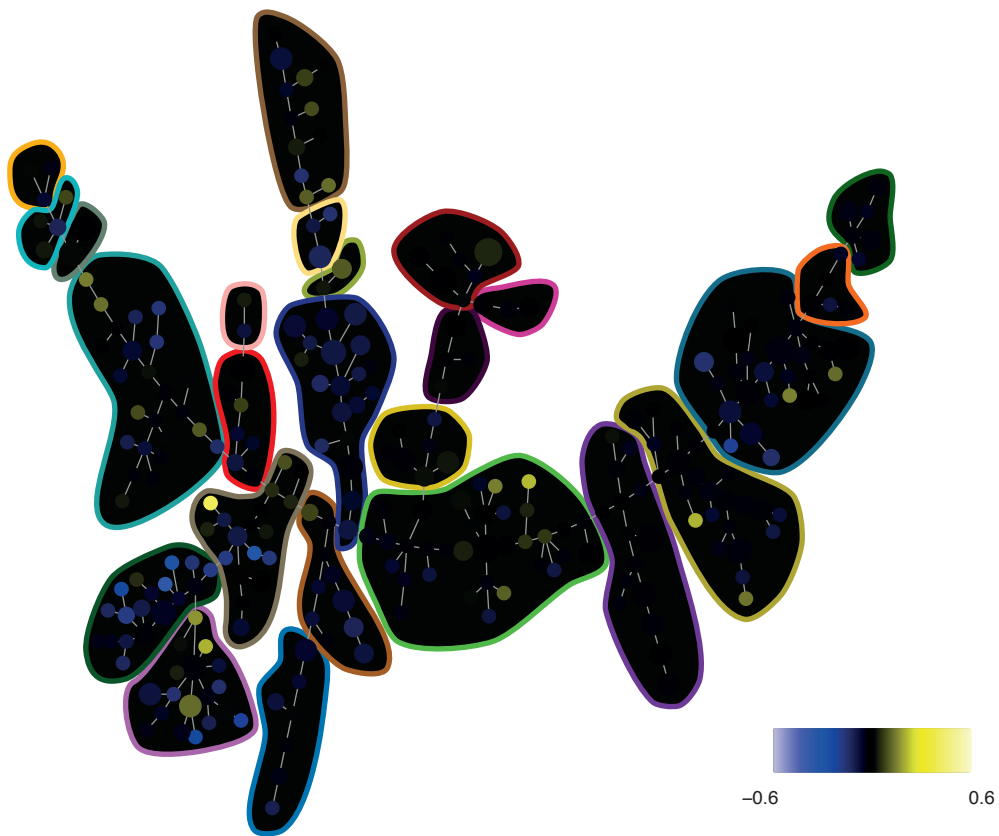

Figure S9A

154-pSHP2 ---- LPS vs Ref Ratio

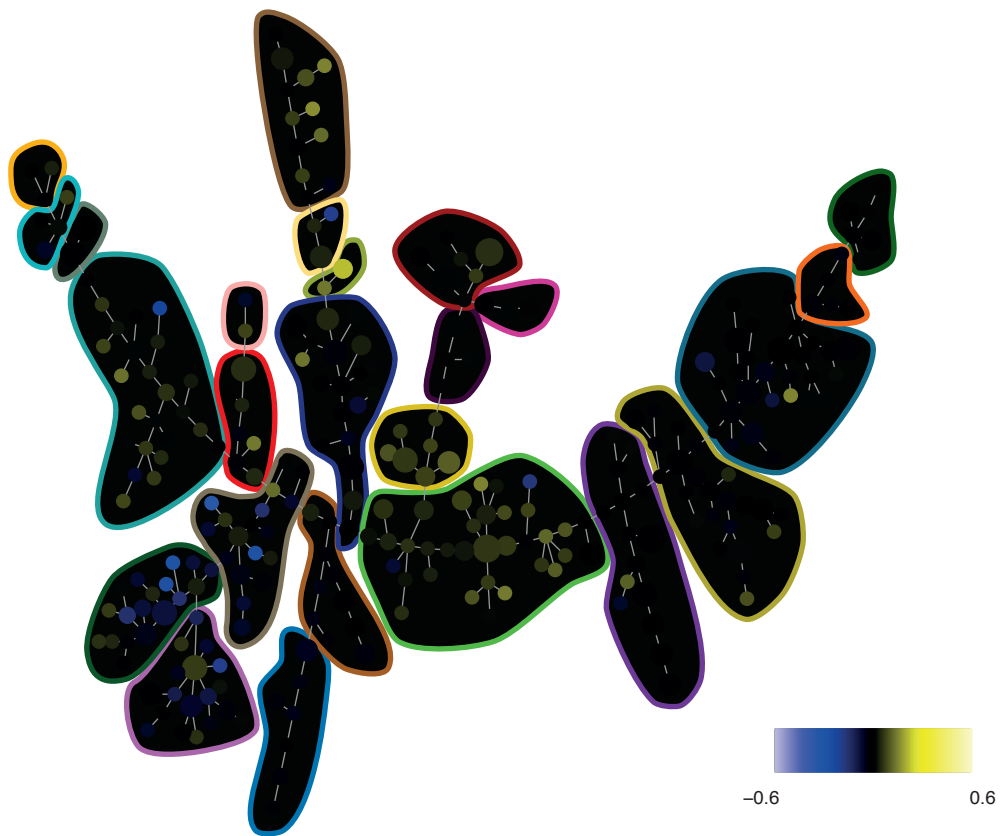

Figure S9A

154-pSHP2 ---- PMAiono vs Ref Ratio

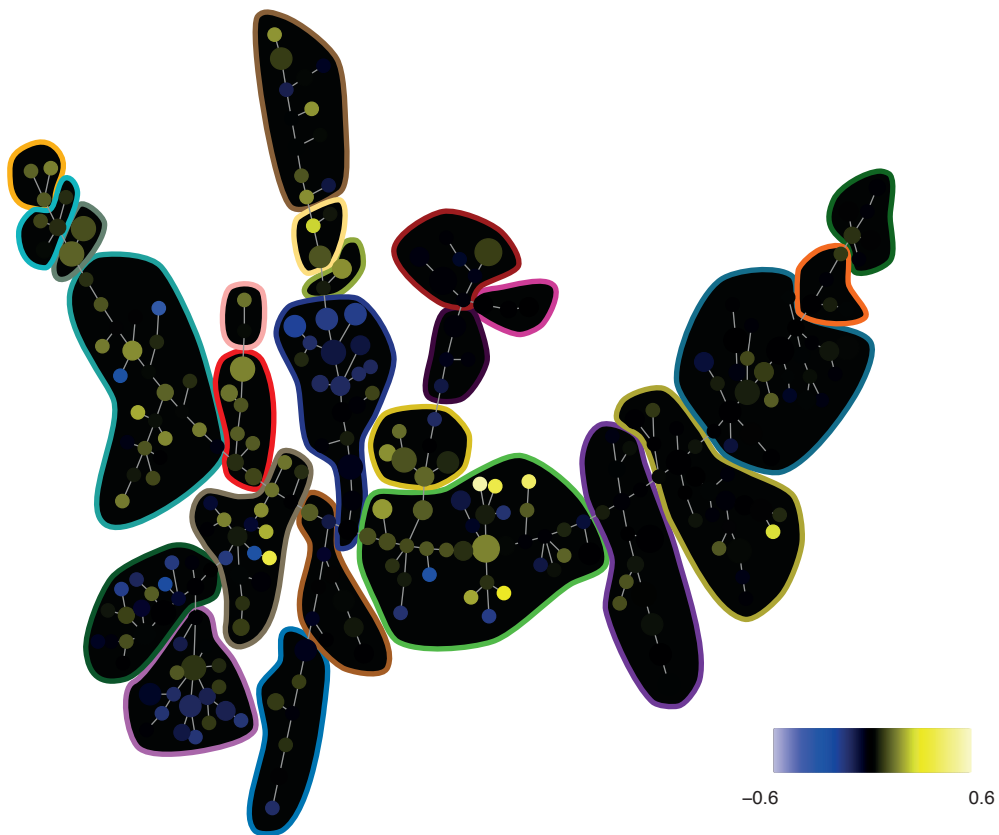

Figure S9A

154-pSHP2 ---- PVO4 vs Ref Ratio

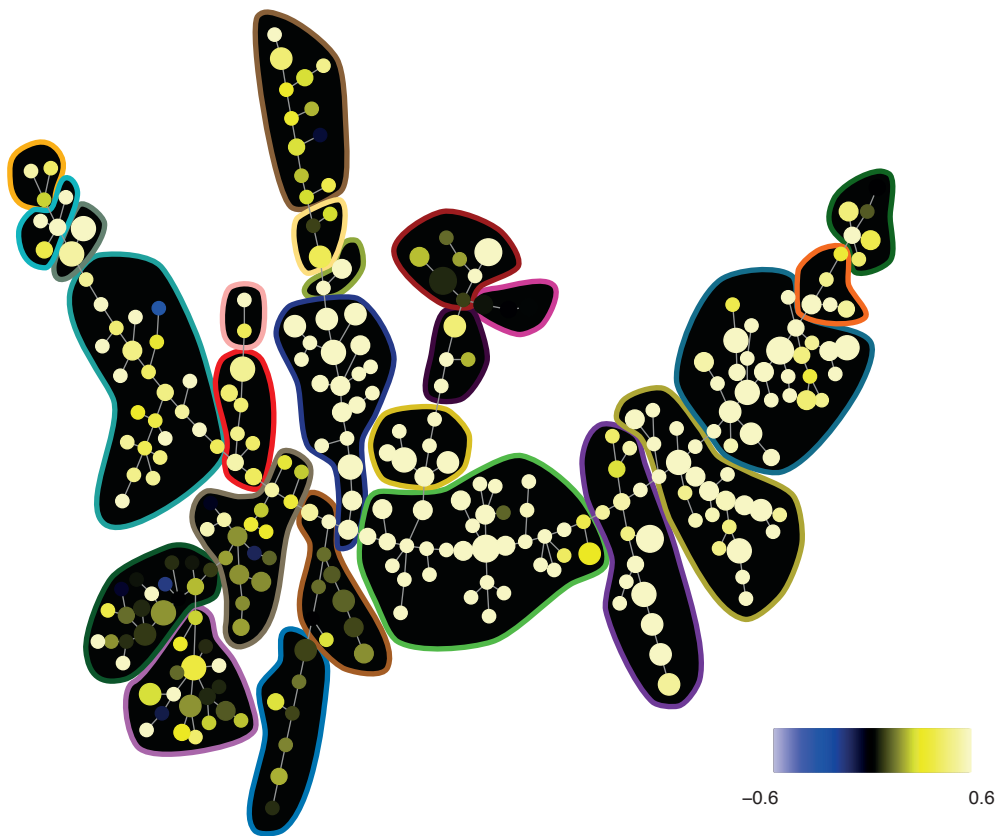

Figure S9A

154-pSHP2 --- SCF vs Ref Ratio

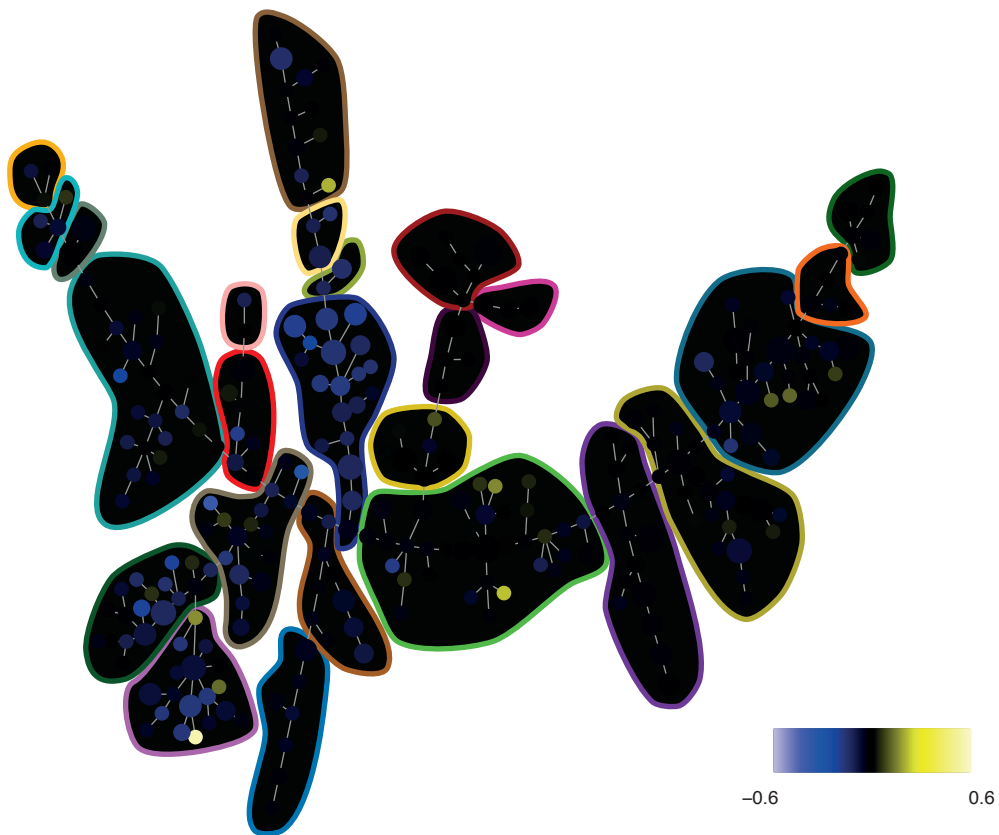

Figure S9A

154-pSHP2 ---- TNFa vs Ref Ratio

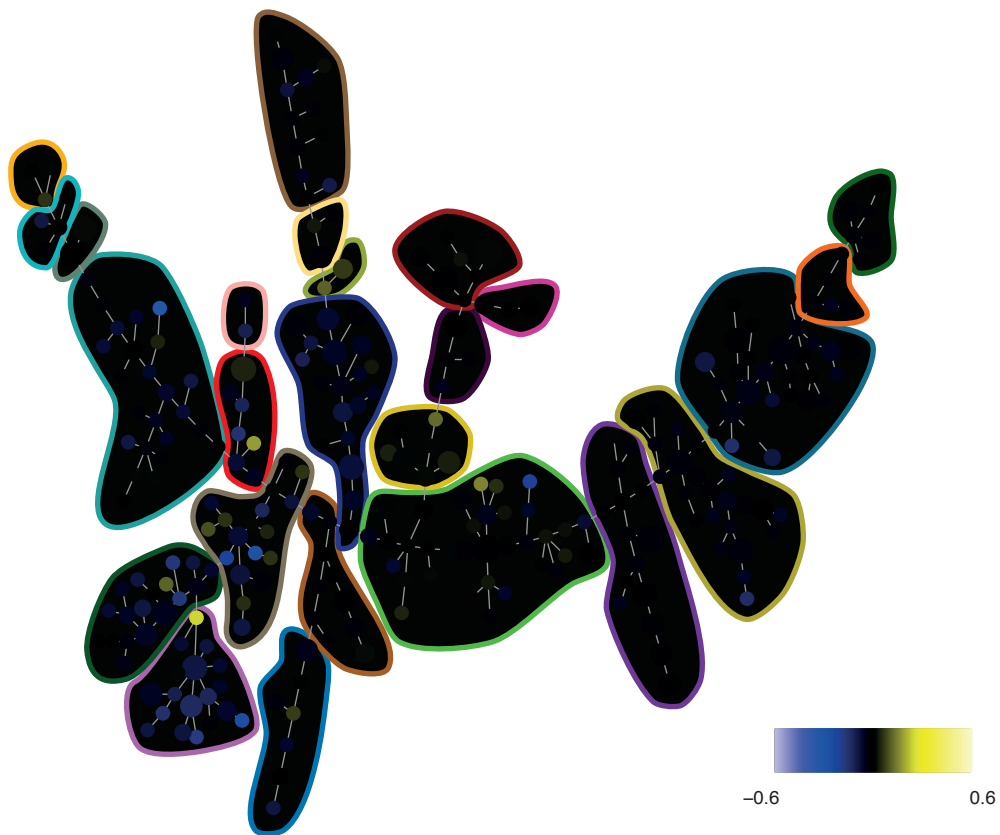

Figure S9A

154-pSHP2 --- TPO vs Ref Ratio

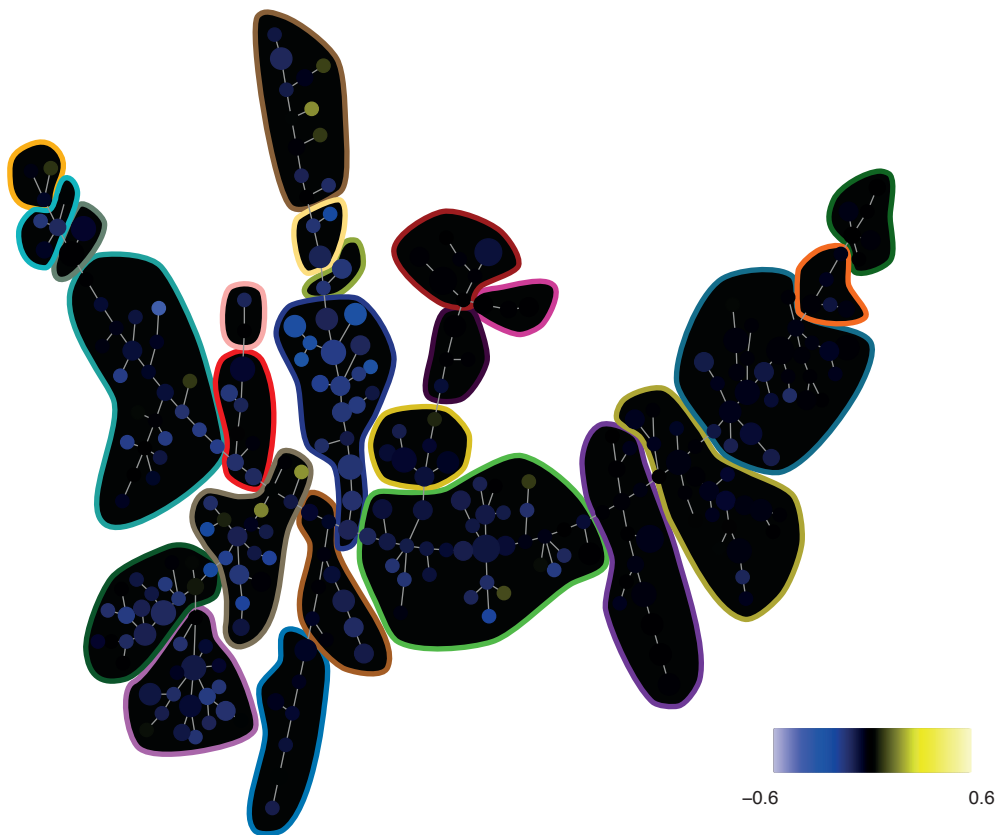



Figure S9A

156-pZAP70/Syk --- BCR vs Ref Ratio

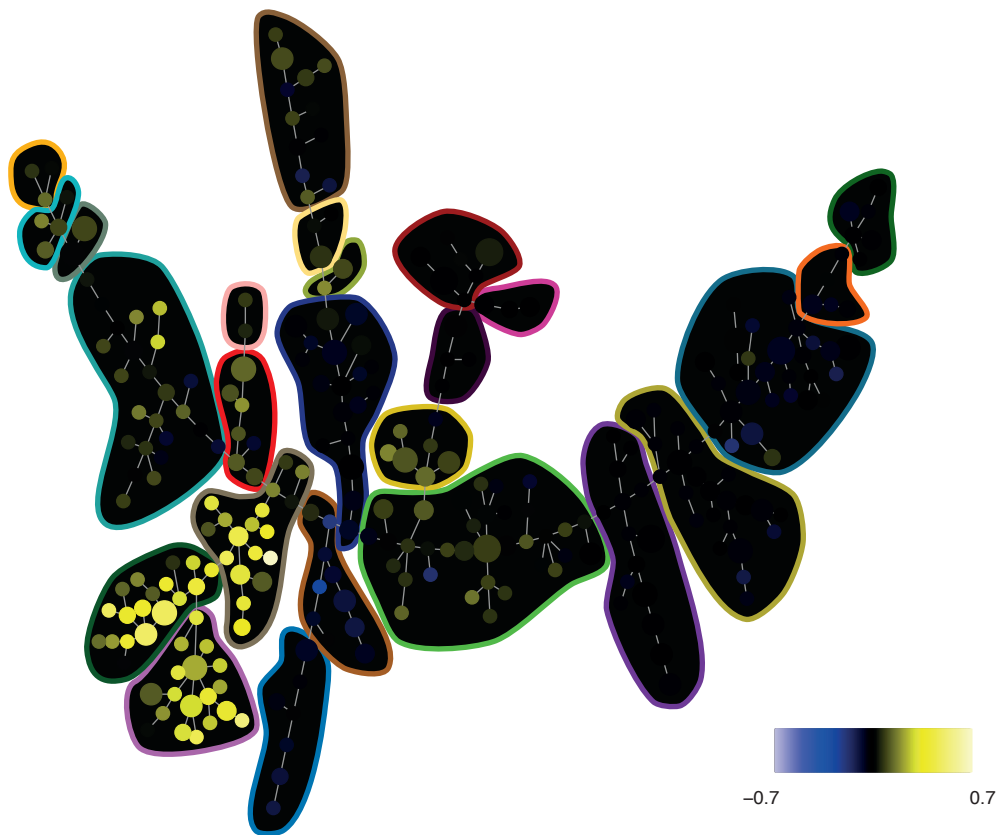

Figure S9A

156-pZAP70/Syk --- DMSO vs Ref Ratio

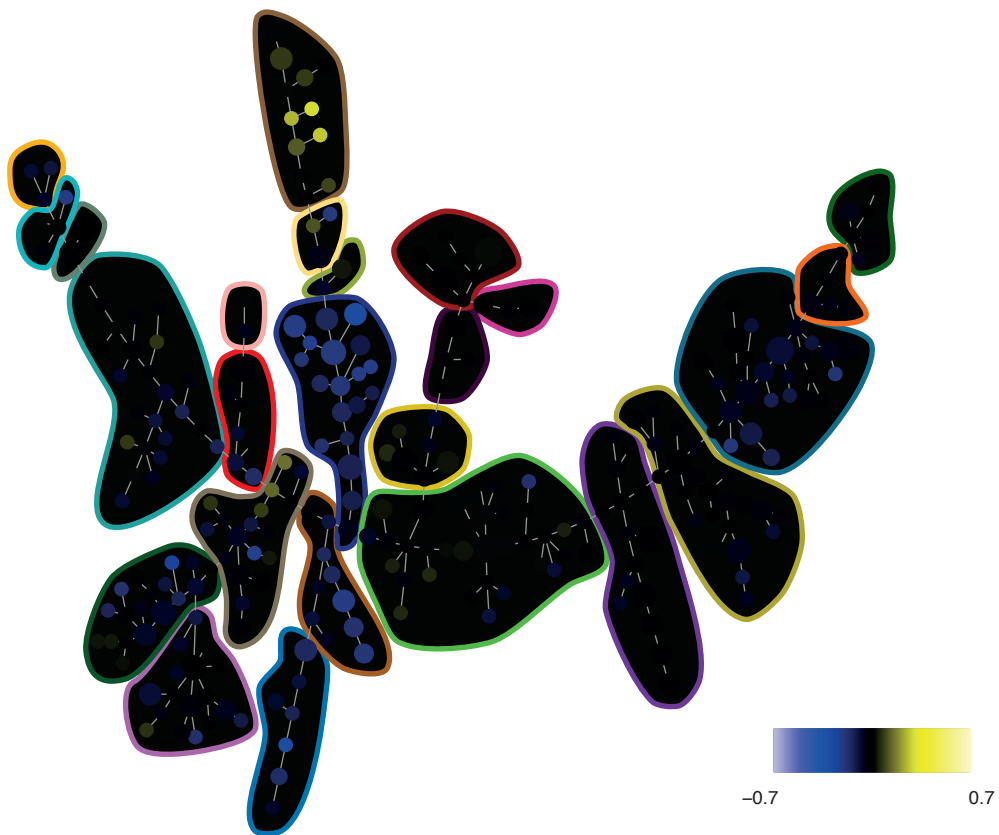

Figure S9A

156-pZAP70/Syk --- Flt3L vs Ref Ratio

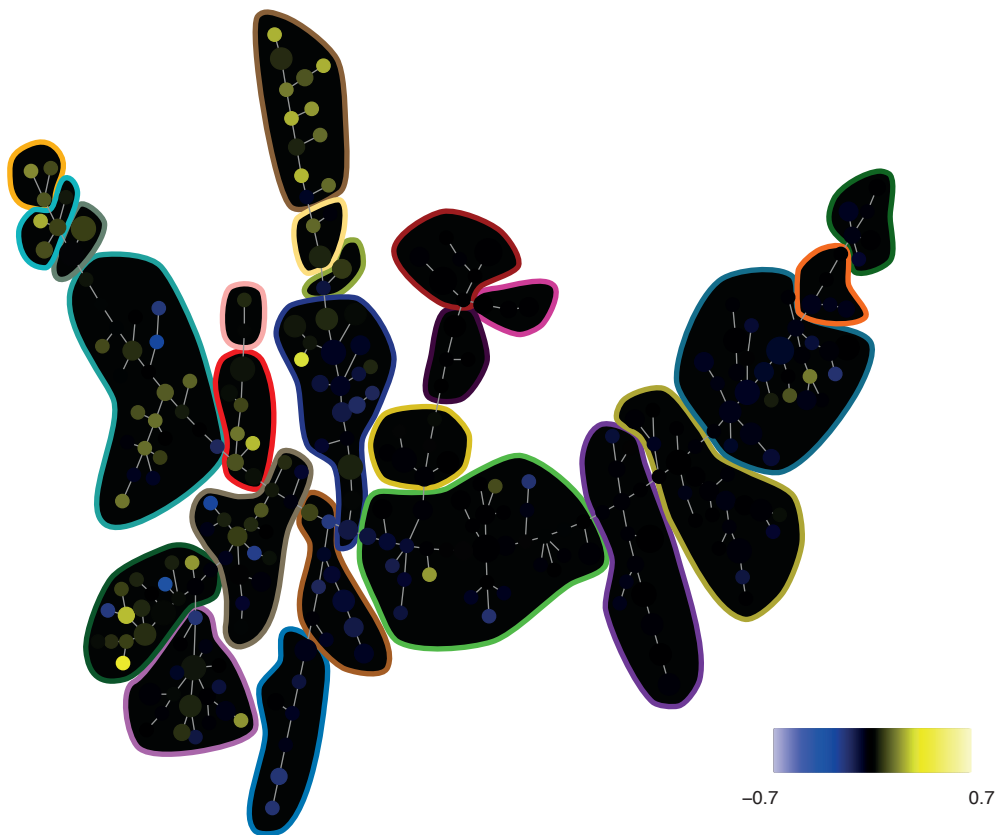

Figure S9A

156-pZAP70/Syk --- GCSF vs Ref Ratio

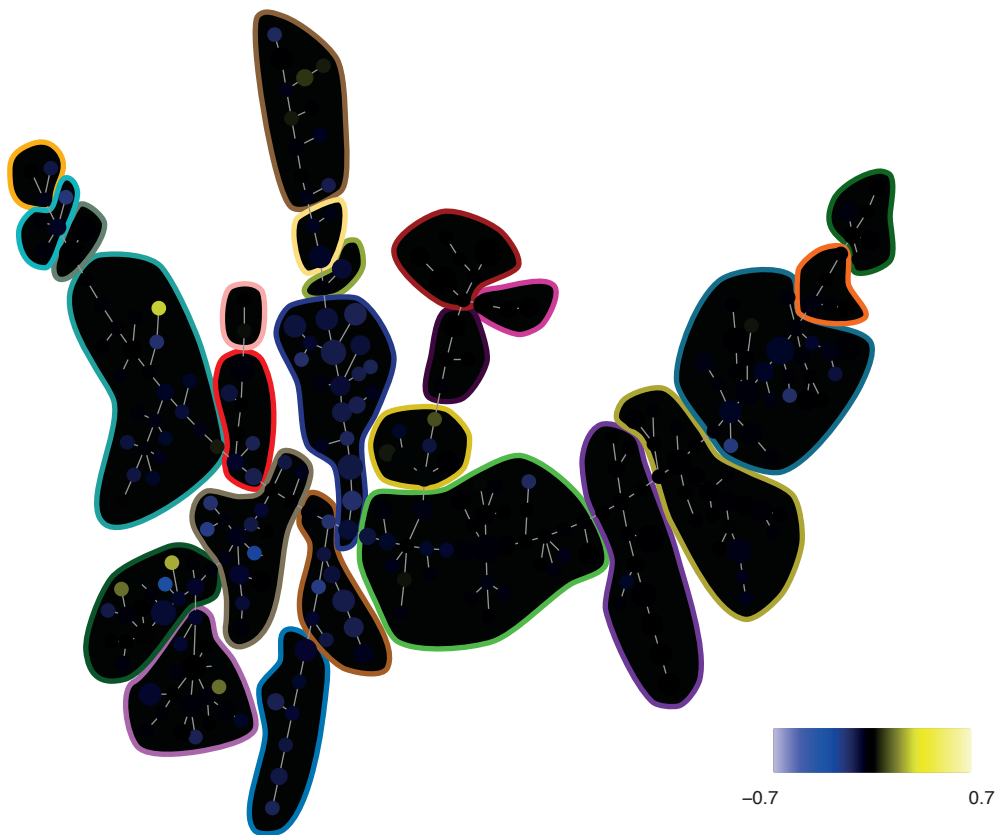

Figure S9A

156-pZAP70/Syk — GMCSF vs Ref Ratio

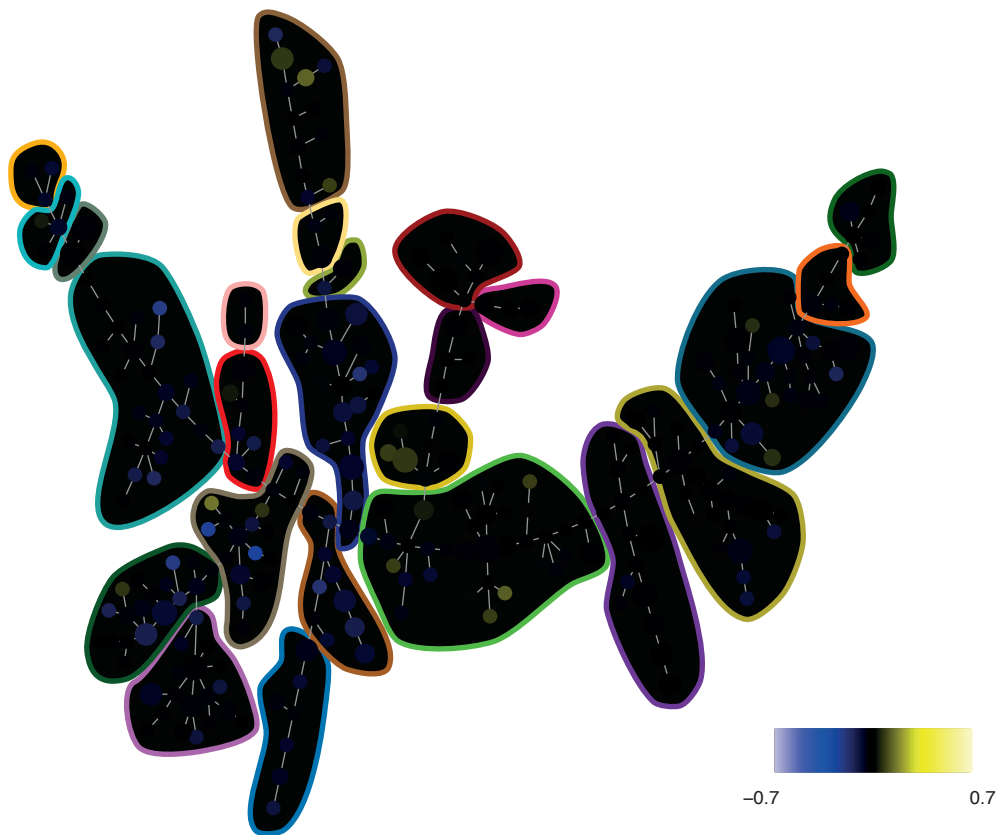

Figure S9A

156-pZAP70/Syk ---- IFNad vs Ref Ratio

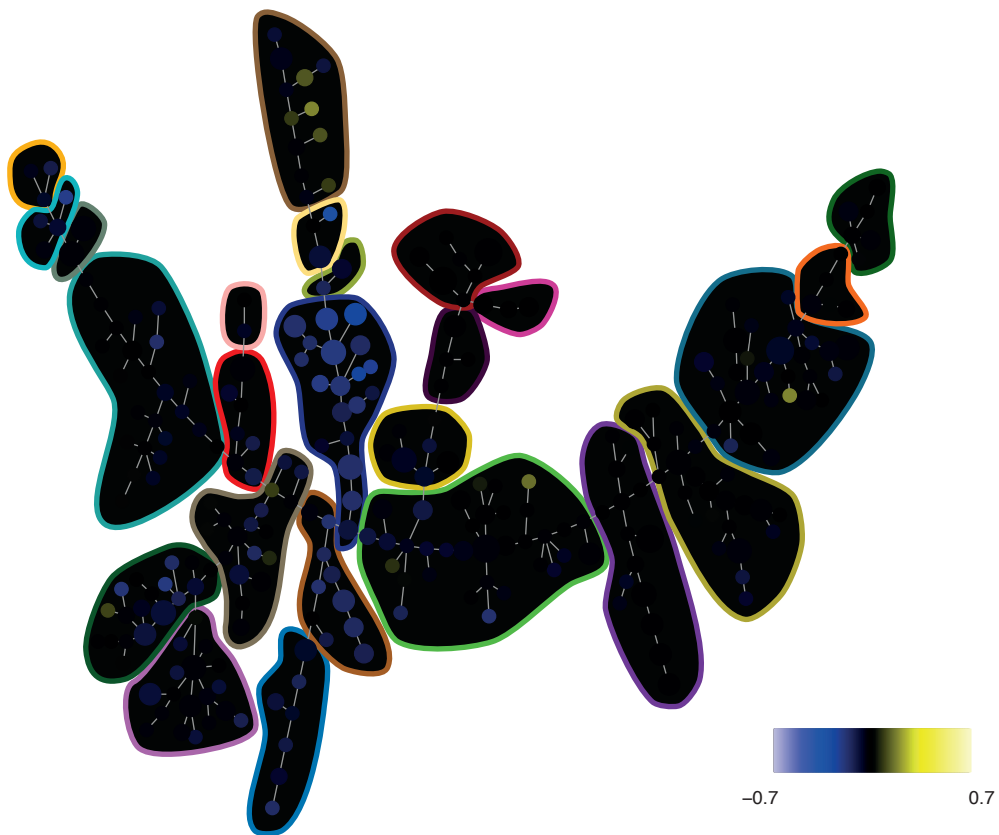

Figure S9A

156-pZAP70/Syk ---- IL3 vs Ref Ratio

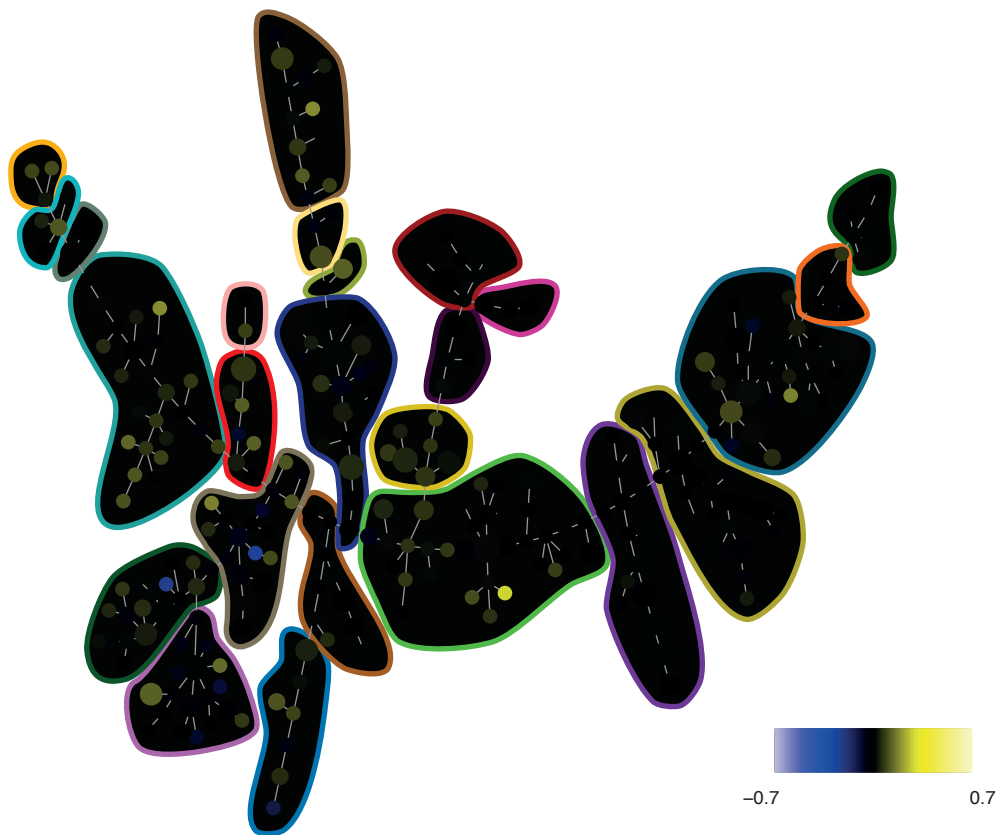

Figure S9A

156-pZAP70/Syk ---- IL7 vs Ref Ratio

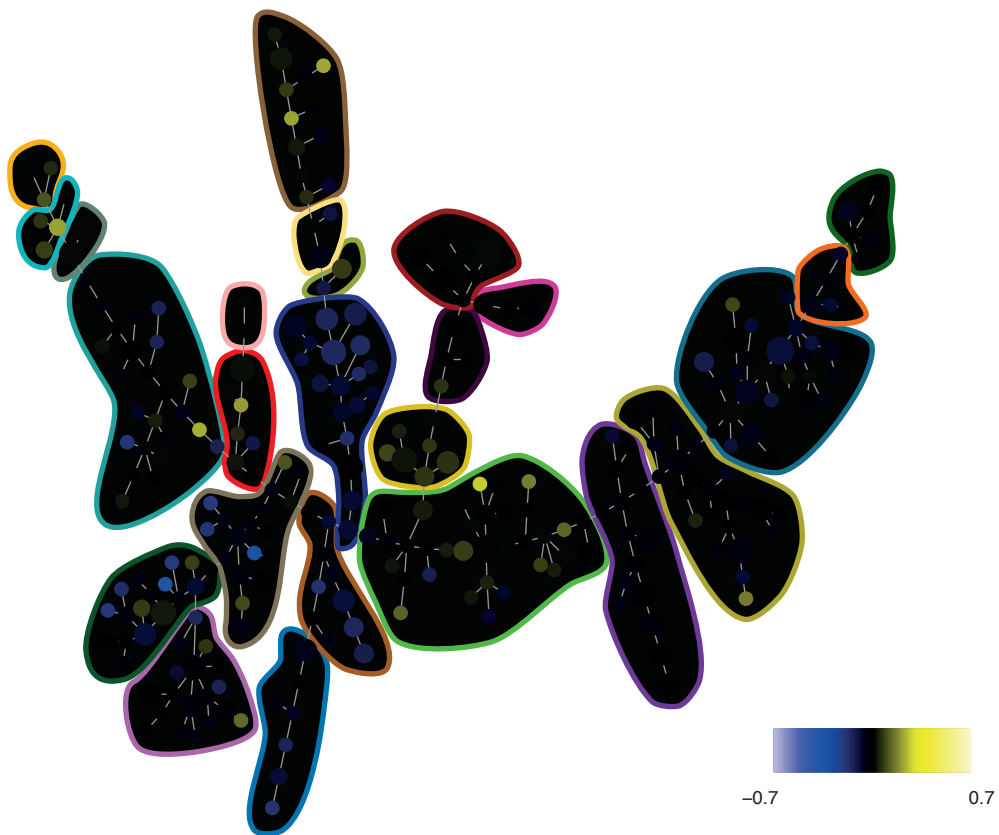



Figure S9A

156-pZAP70/Syk ---- LPS vs Ref Ratio

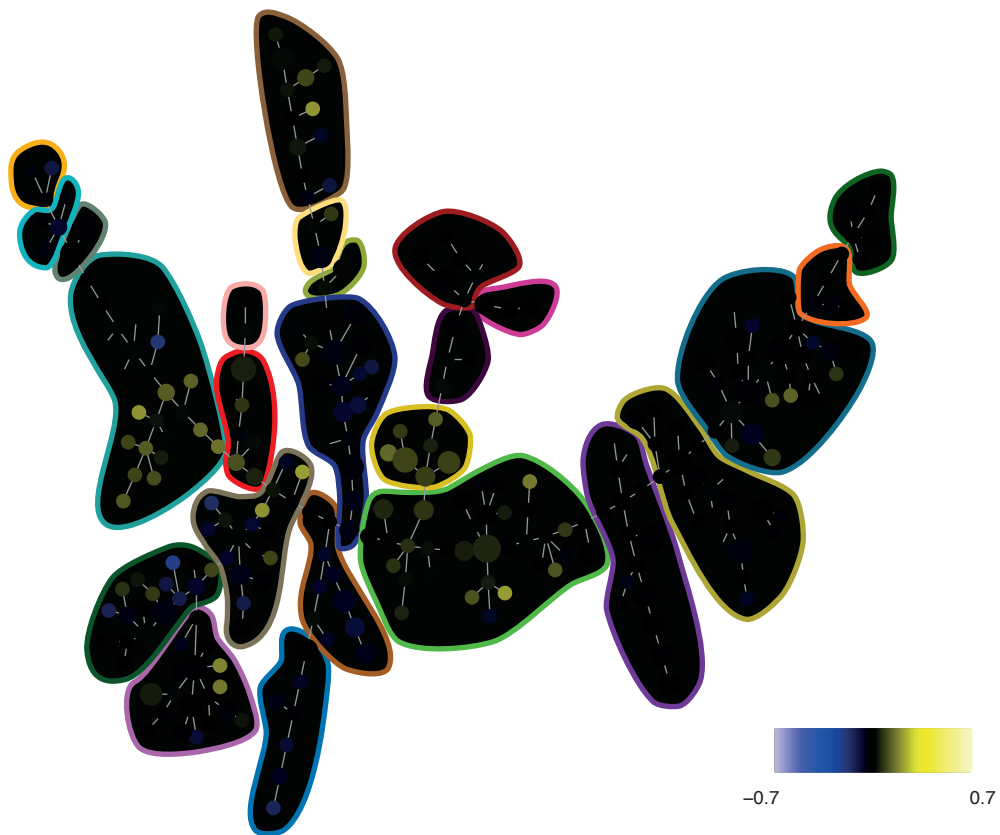

Figure S9A

156-pZAP70/Syk ---- PMAiono vs Ref Ratio

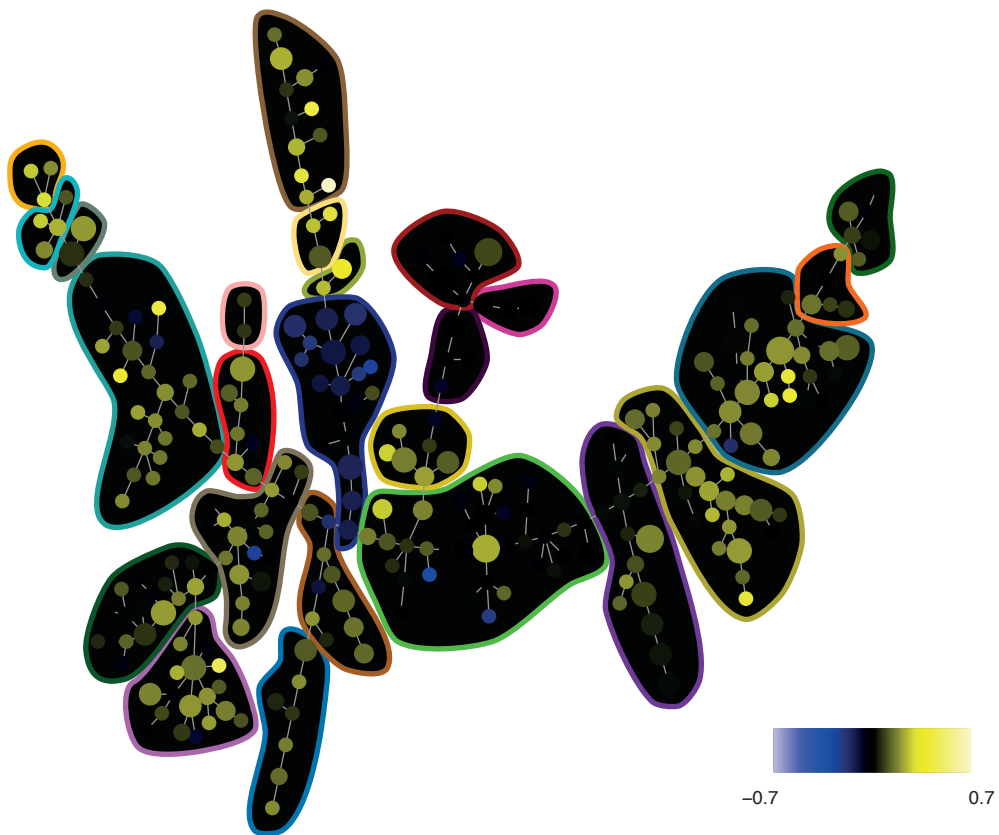

Figure S9A

156-pZAP70/Syk ---- PVO4 vs Ref Ratio

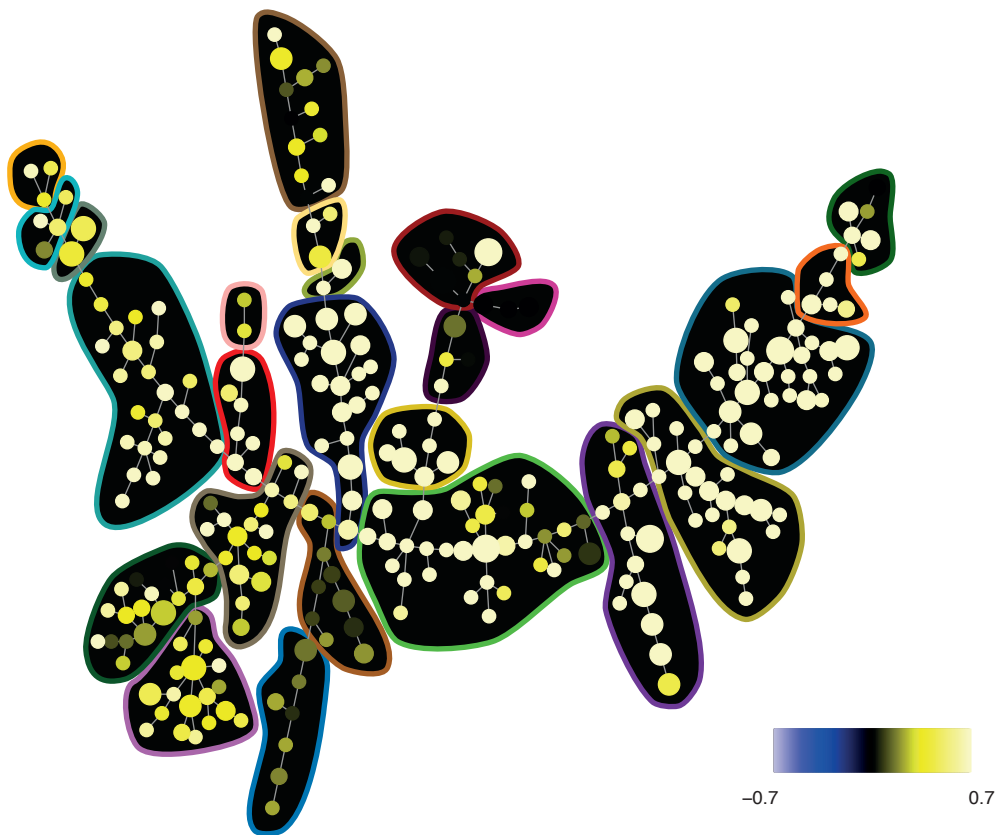

Figure S9A

156-pZAP70/Syk ---- SCF vs Ref Ratio

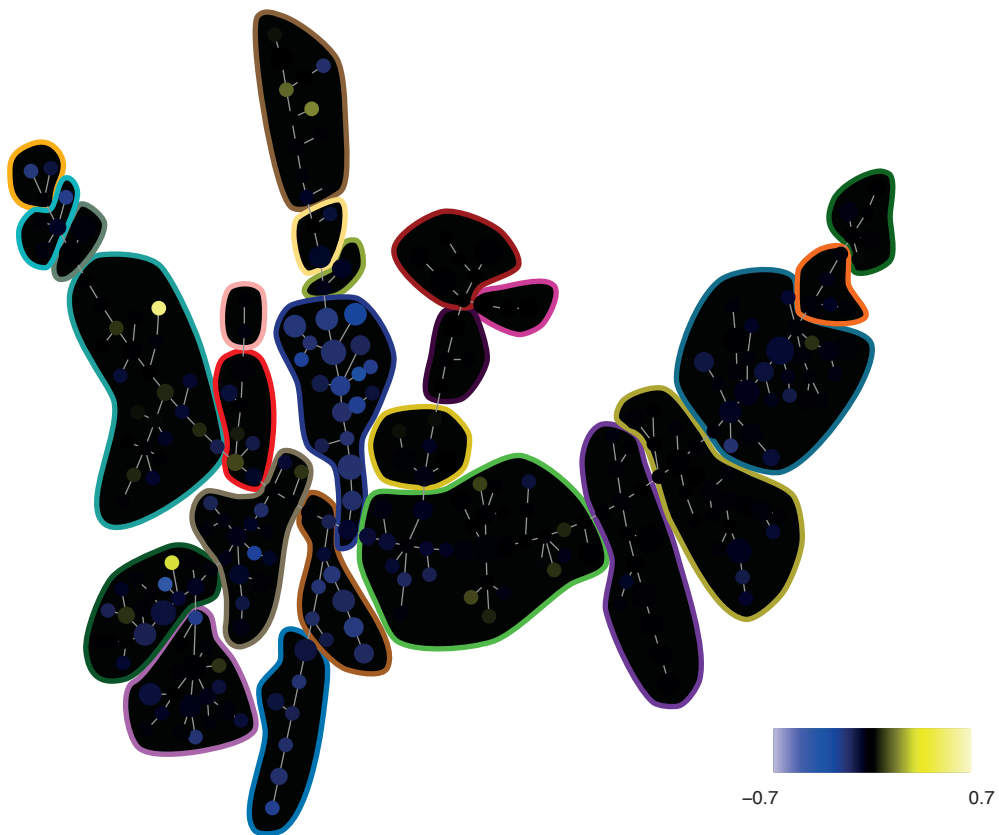

Figure S9A

156-pZAP70/Syk ---- TNFa vs Ref Ratio

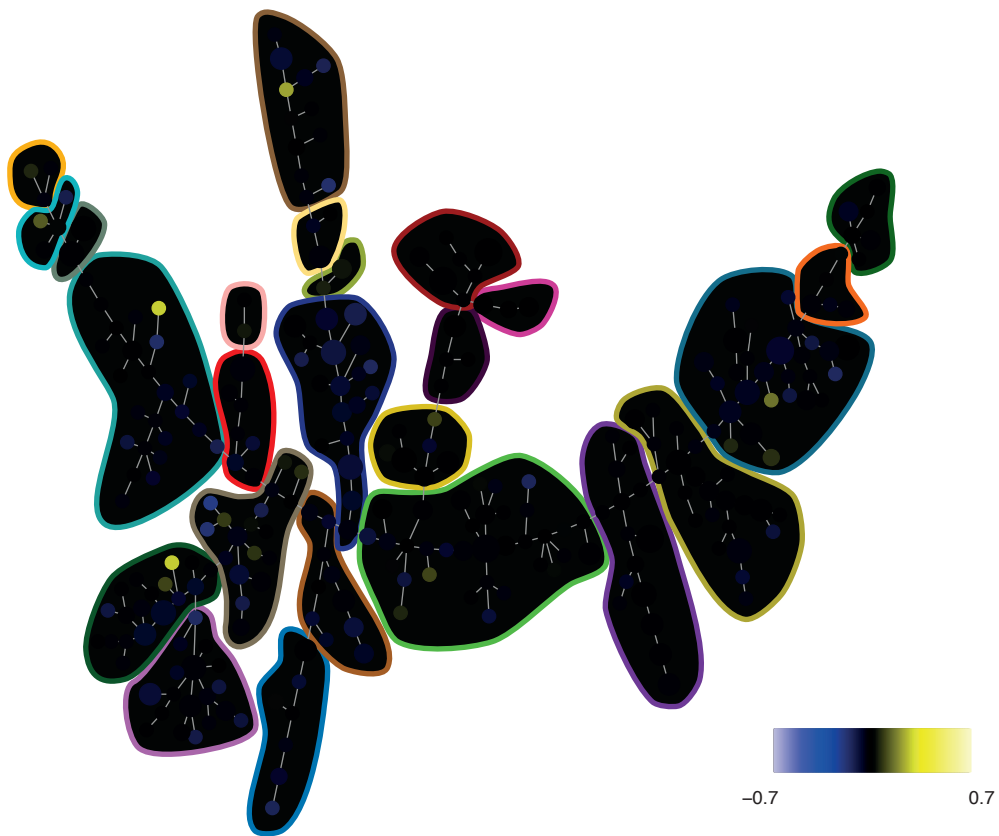

Figure S9A

156-pZAP70/Syk --- TPO vs Ref Ratio

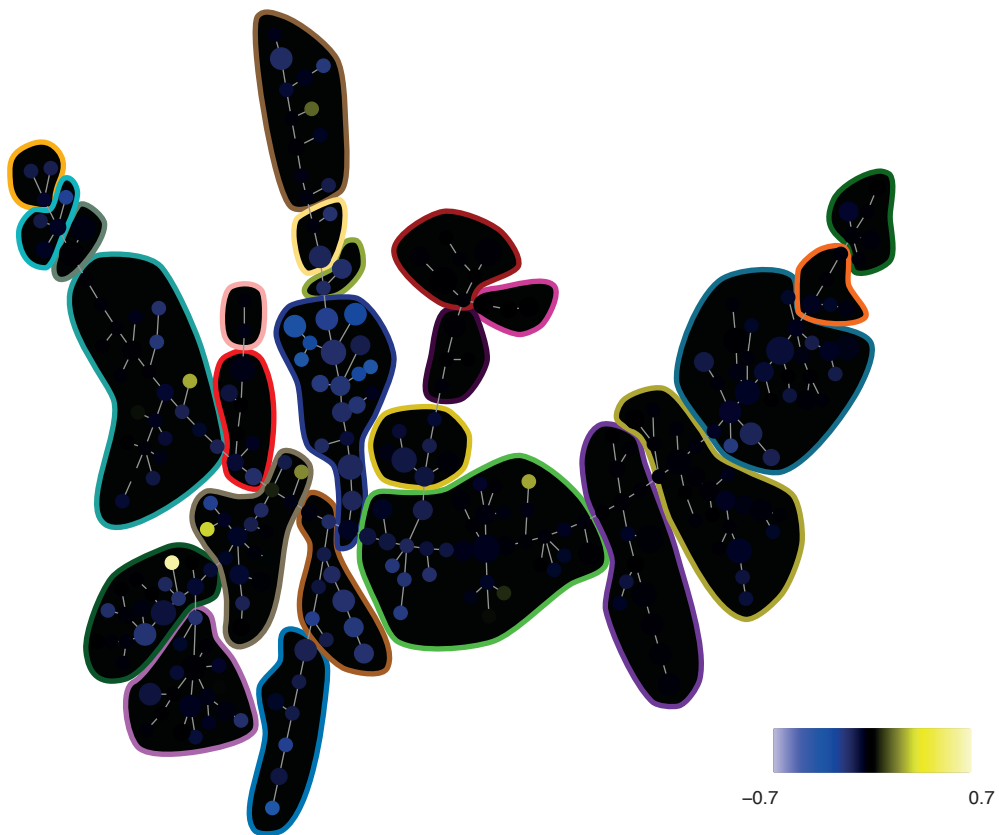

Figure S9A

159-pSTAT3 ---- BCR vs Ref Ratio

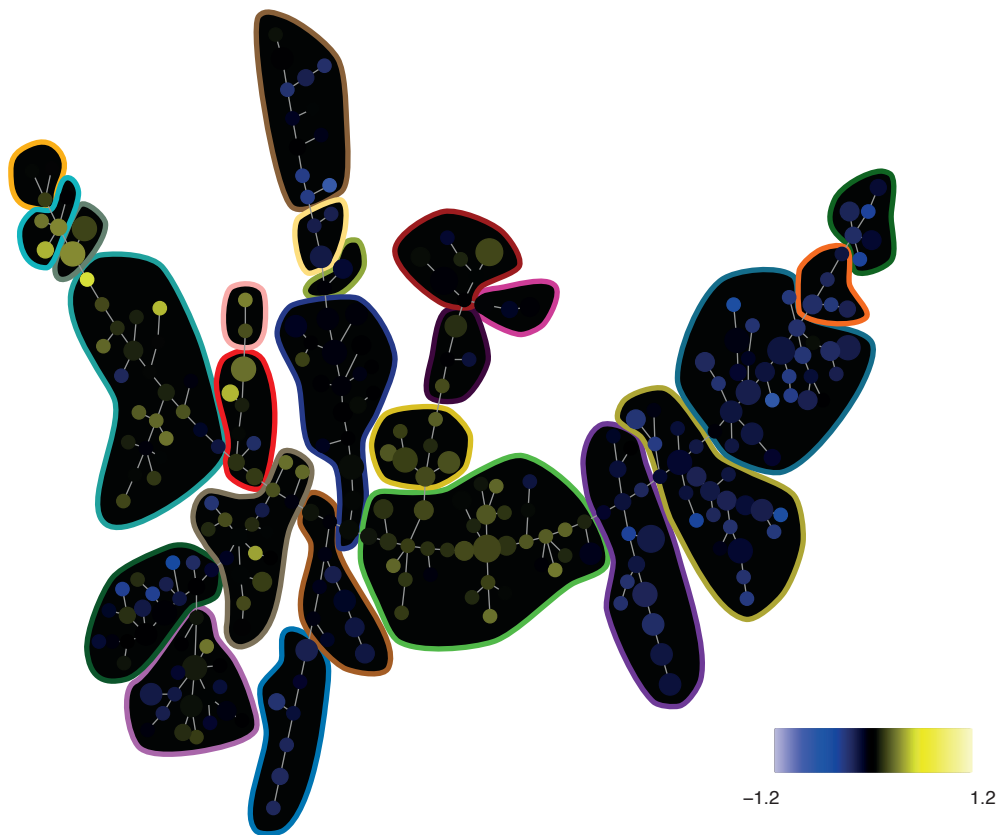

Figure S9A

159-pSTAT3 ---- DMSO vs Ref Ratio

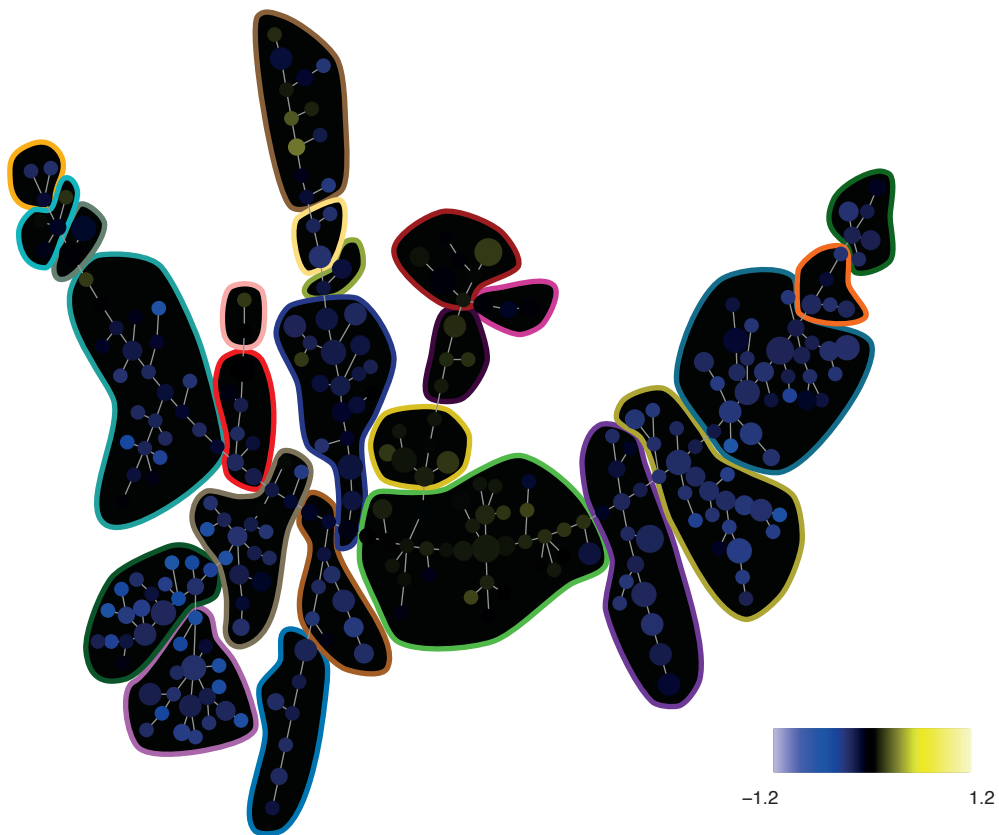



Figure S9A

159-pSTAT3 ---- Flt3L vs Ref Ratio

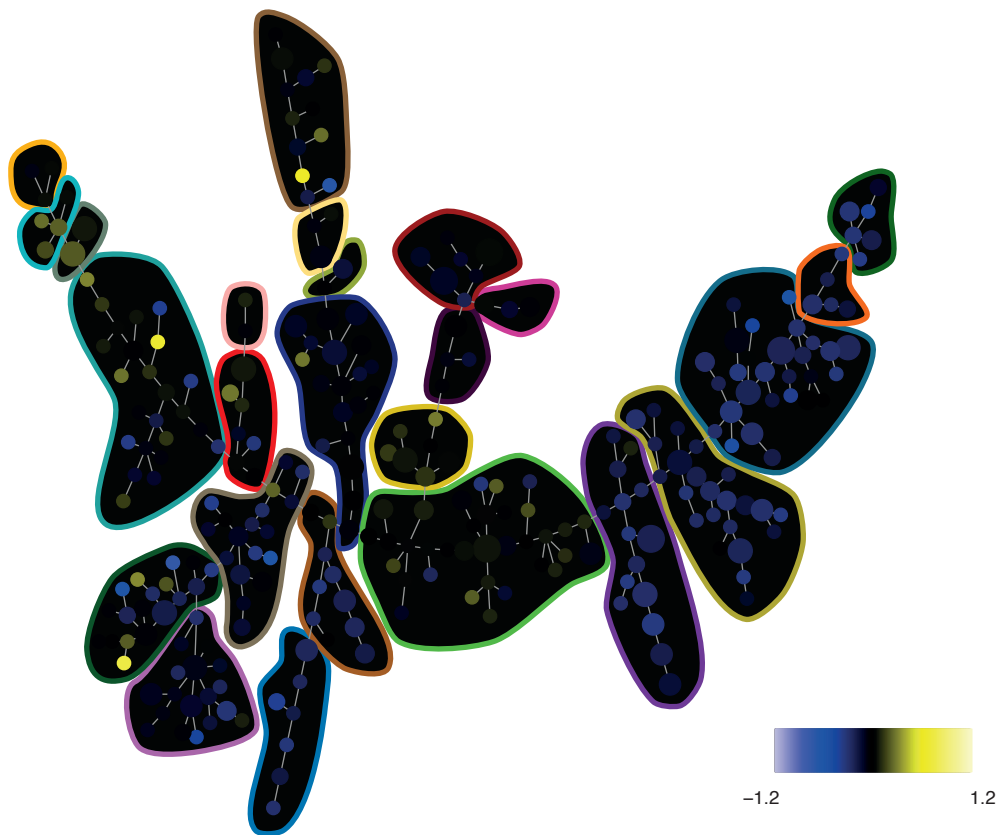

Figure S9A

159-pSTAT3 --- GCSF vs Ref Ratio

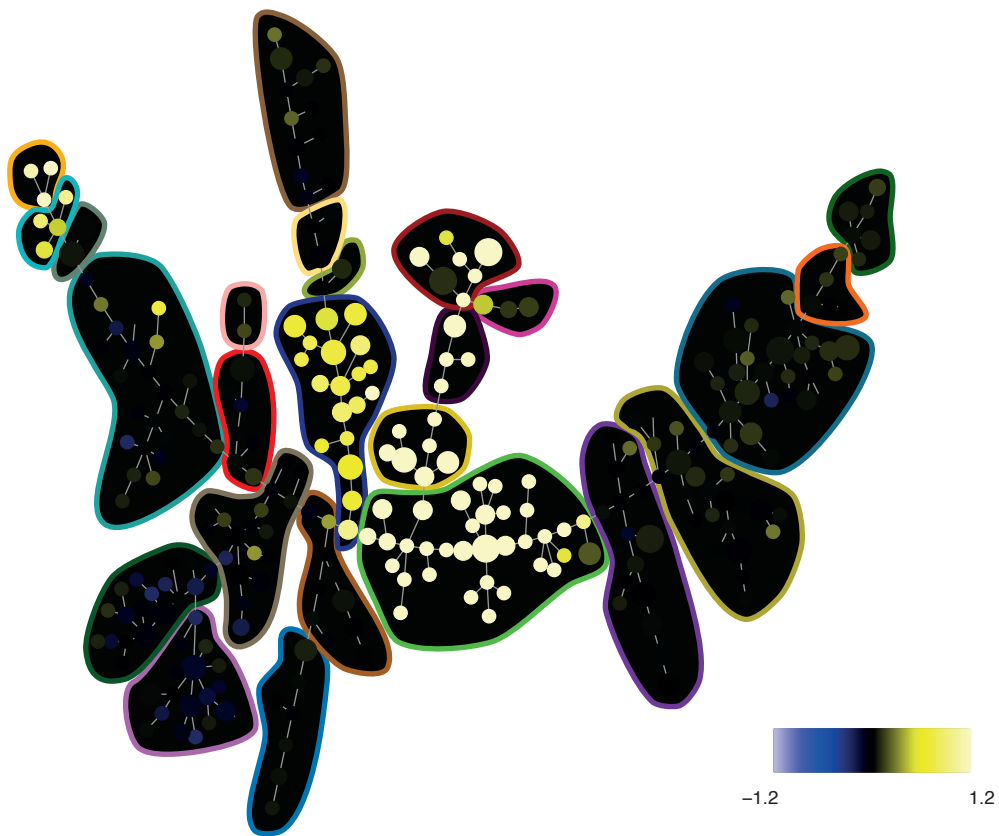

Figure S9A

159-pSTAT3 ---- GMCSF vs Ref Ratio

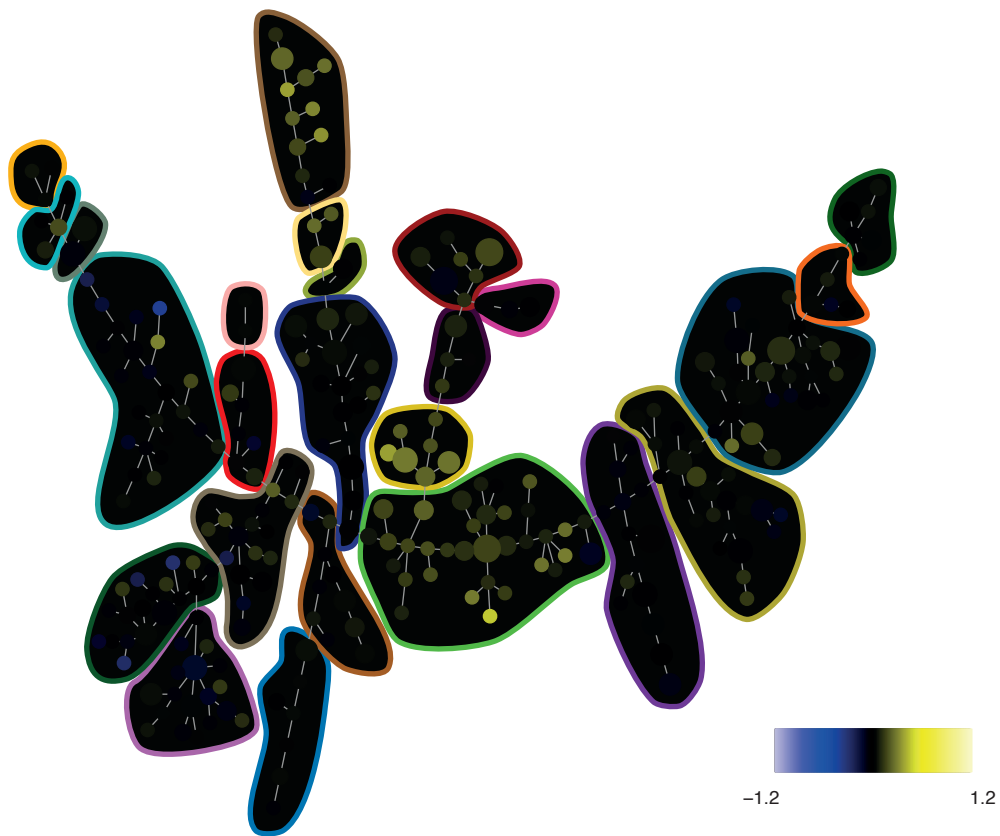

Figure S9A

159-pSTAT3 ---- IFNad vs Ref Ratio

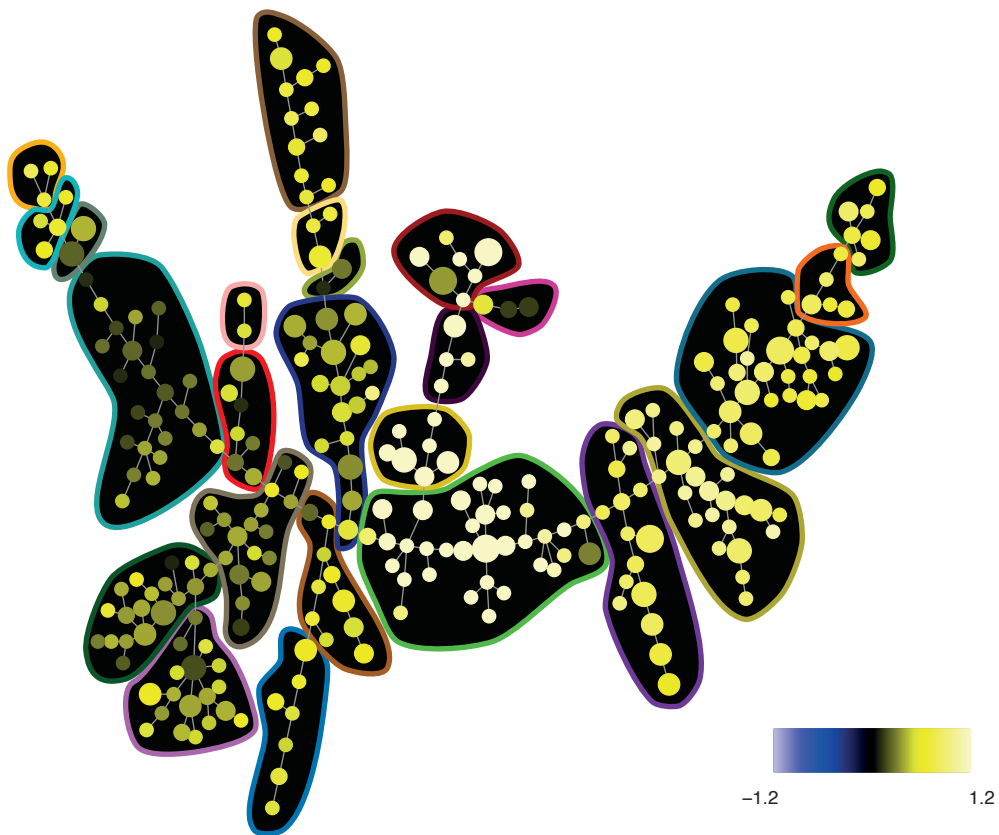

Figure S9A

159-pSTAT3 --- IL3 vs Ref Ratio

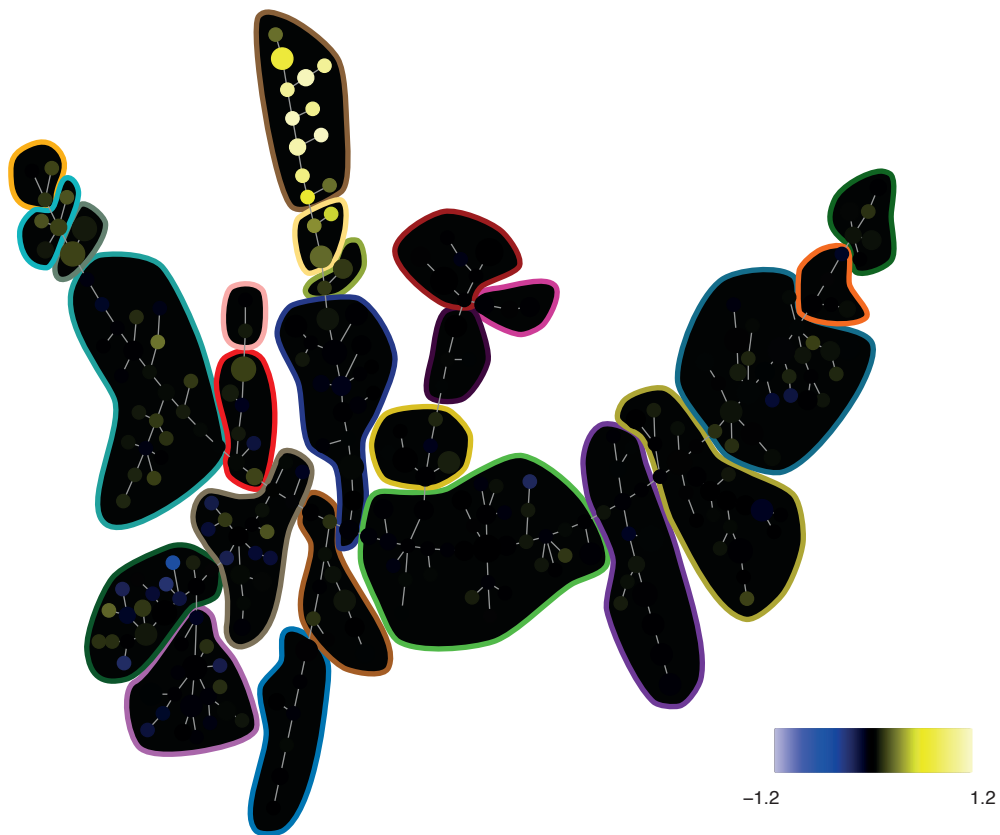

Figure S9A

159-pSTAT3 ---- IL7 vs Ref Ratio

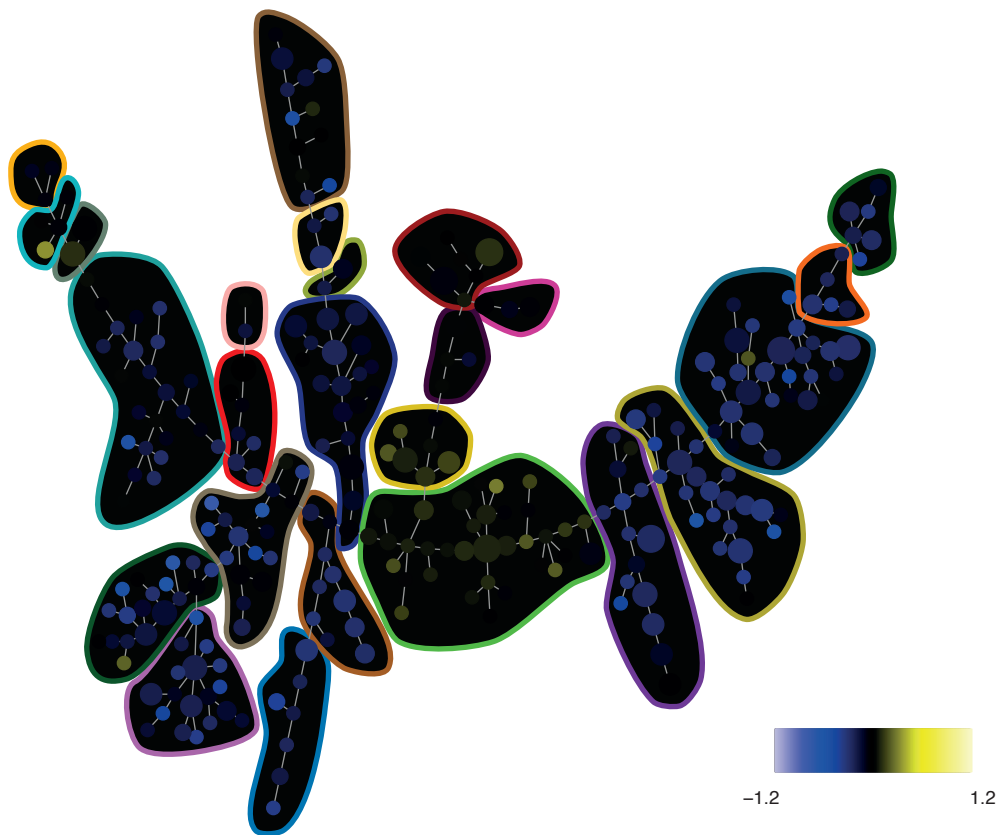

Figure S9A

159-pSTAT3 ---- LPS vs Ref Ratio

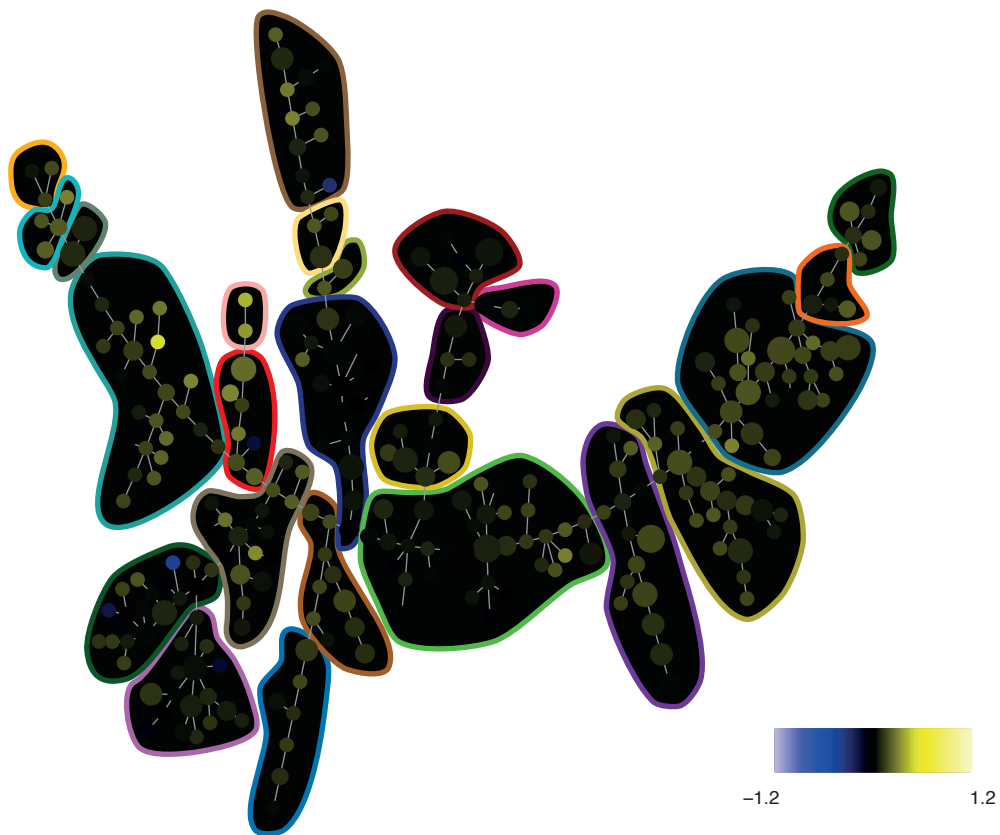

Figure S9A

159-pSTAT3 --- PMAiono vs Ref Ratio

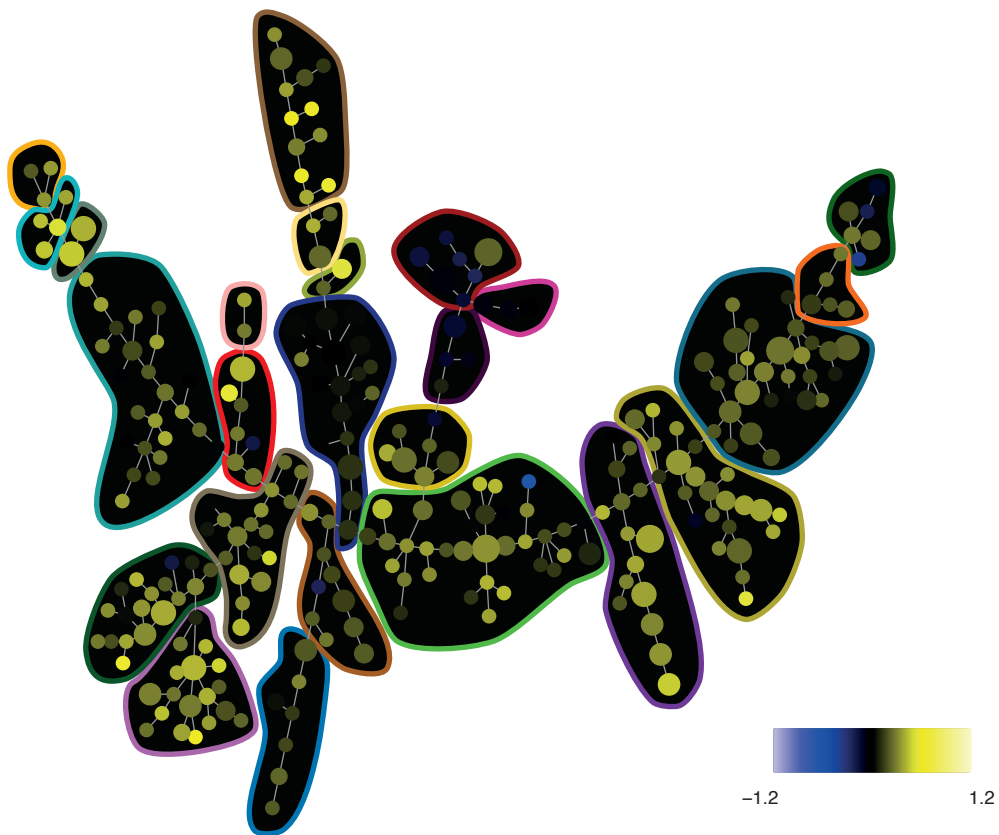



Figure S9A

159-pSTAT3 ---- PVO4 vs Ref Ratio

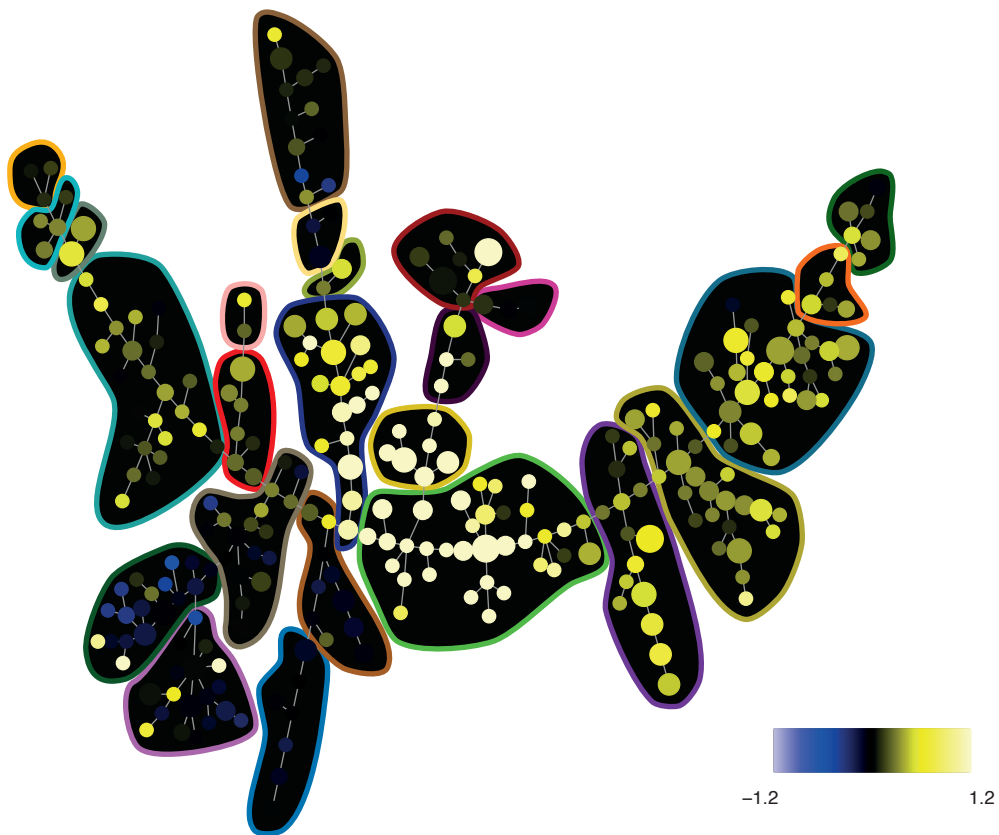

Figure S9A

159-pSTAT3 ---- SCF vs Ref Ratio

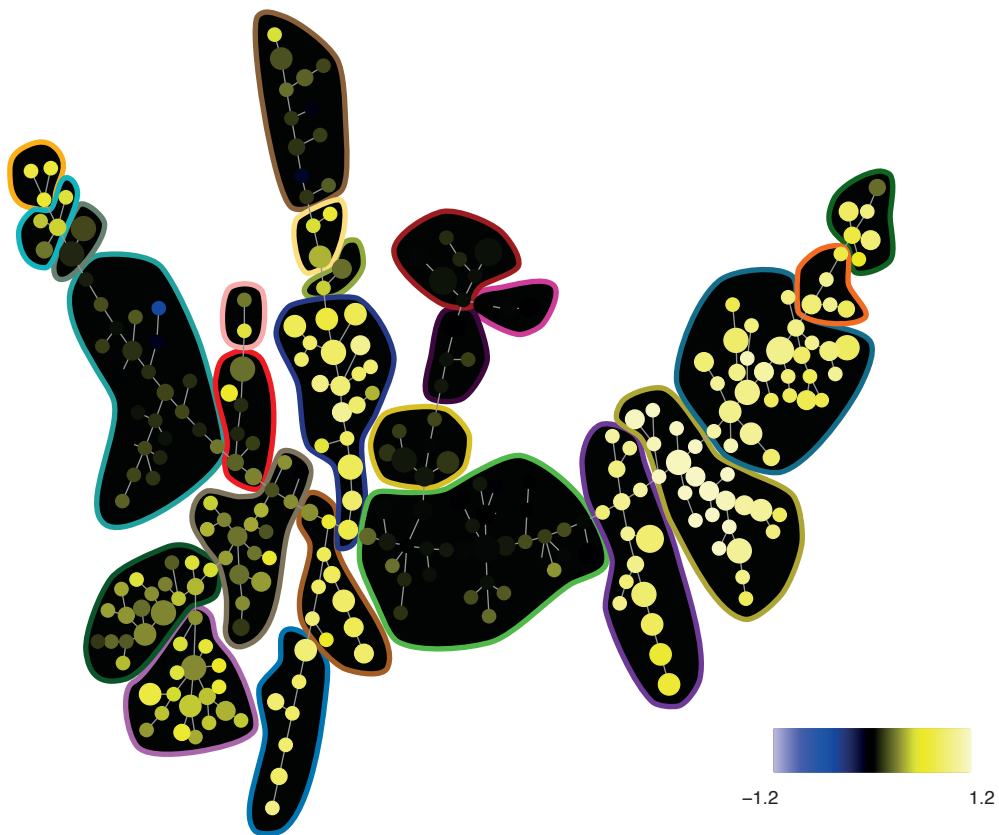

Figure S9A

159-pSTAT3 ---- TNFa vs Ref Ratio

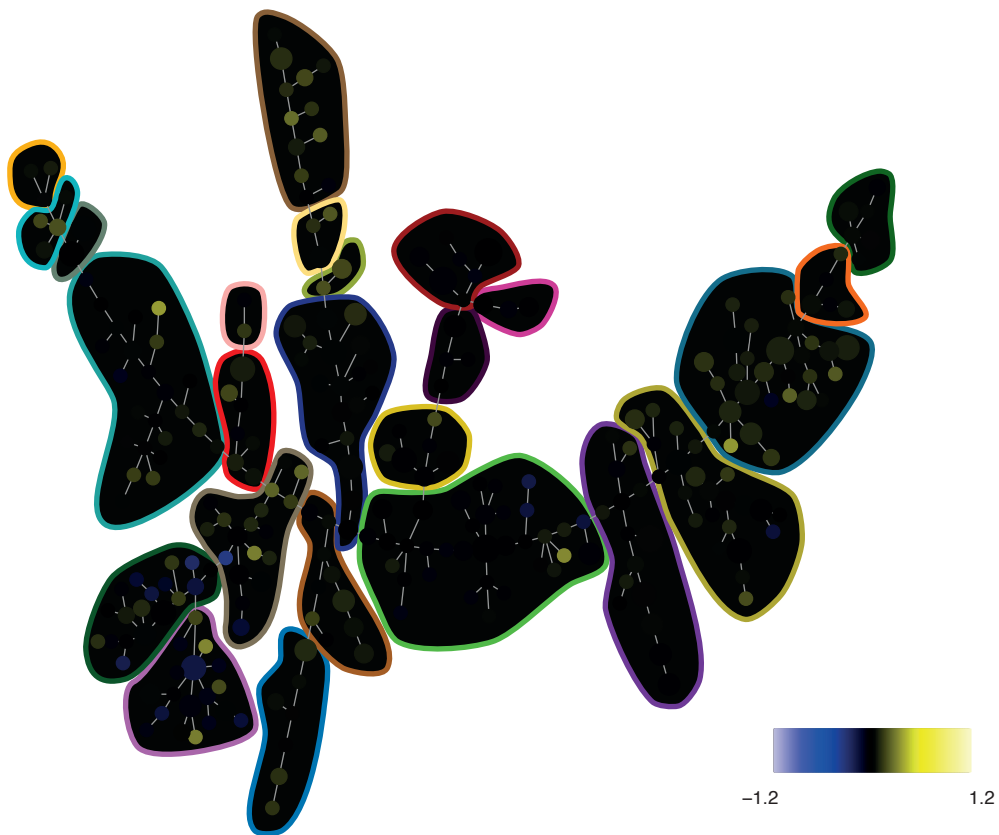

Figure S9A

159-pSTAT3 ---- TPO vs Ref Ratio

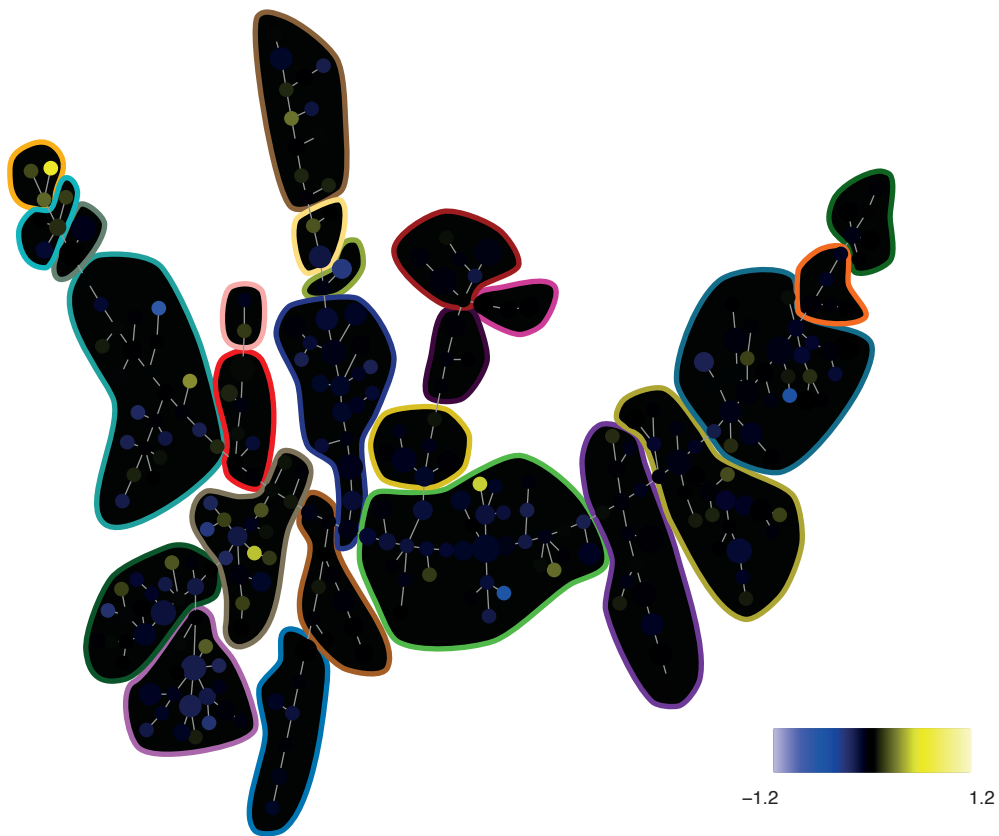

Figure S9A

164-pSLP-76 ---- BCR vs Ref Ratio

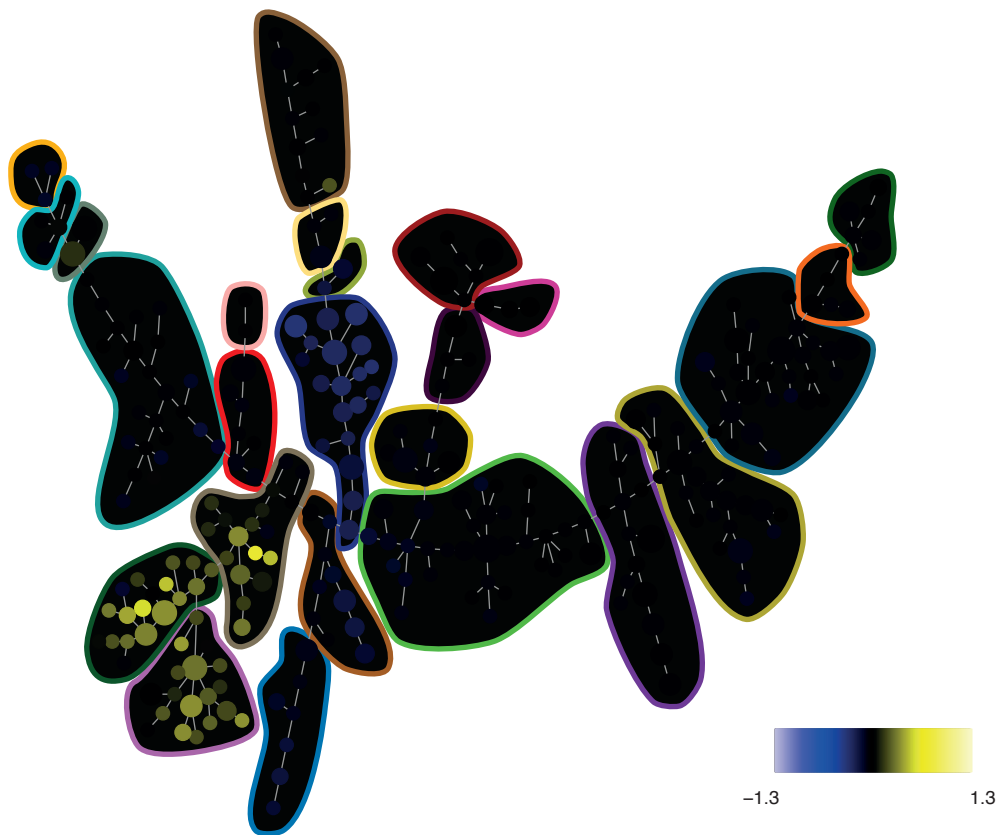

Figure S9A

164-pSLP-76 --- DMSO vs Ref Ratio

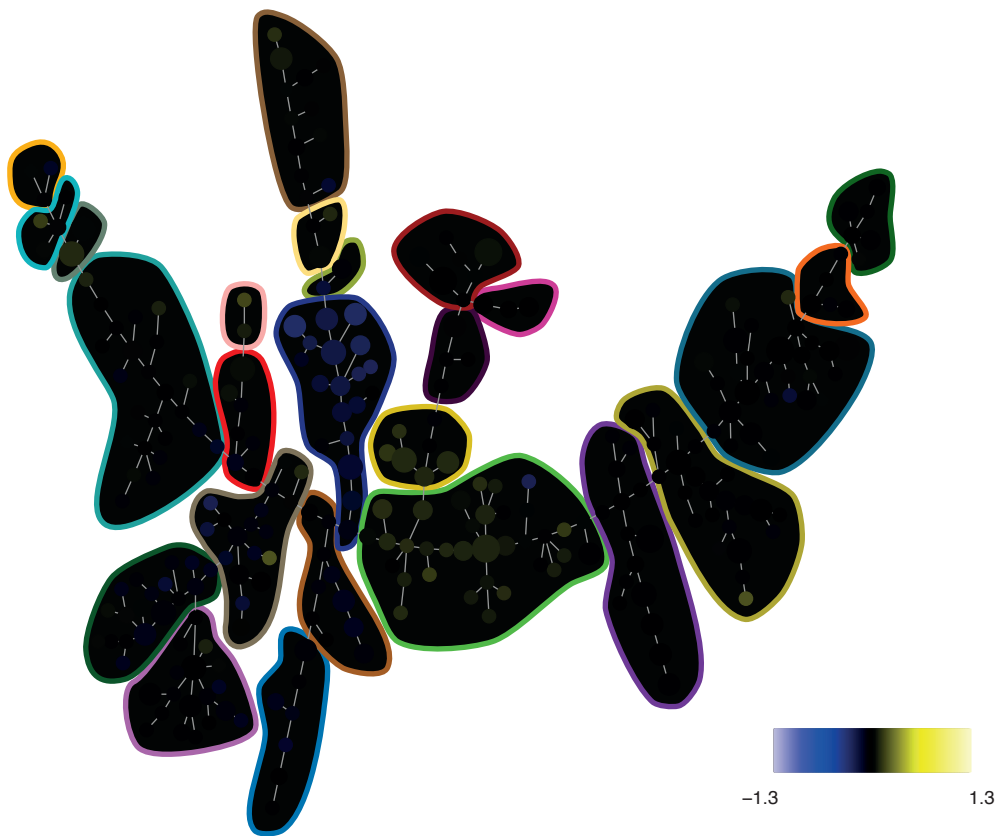

Figure S9A

164-pSLP-76 ---- Flt3L vs Ref Ratio

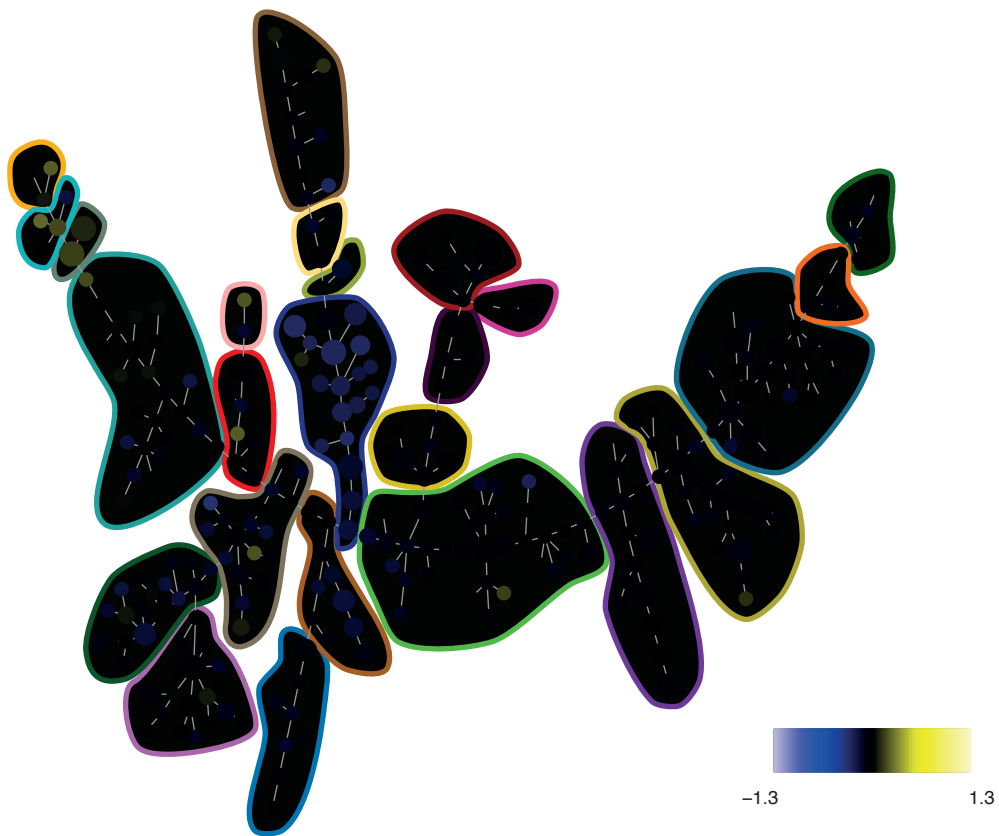

Figure S9A

164-pSLP-76 ---- GCSF vs Ref Ratio

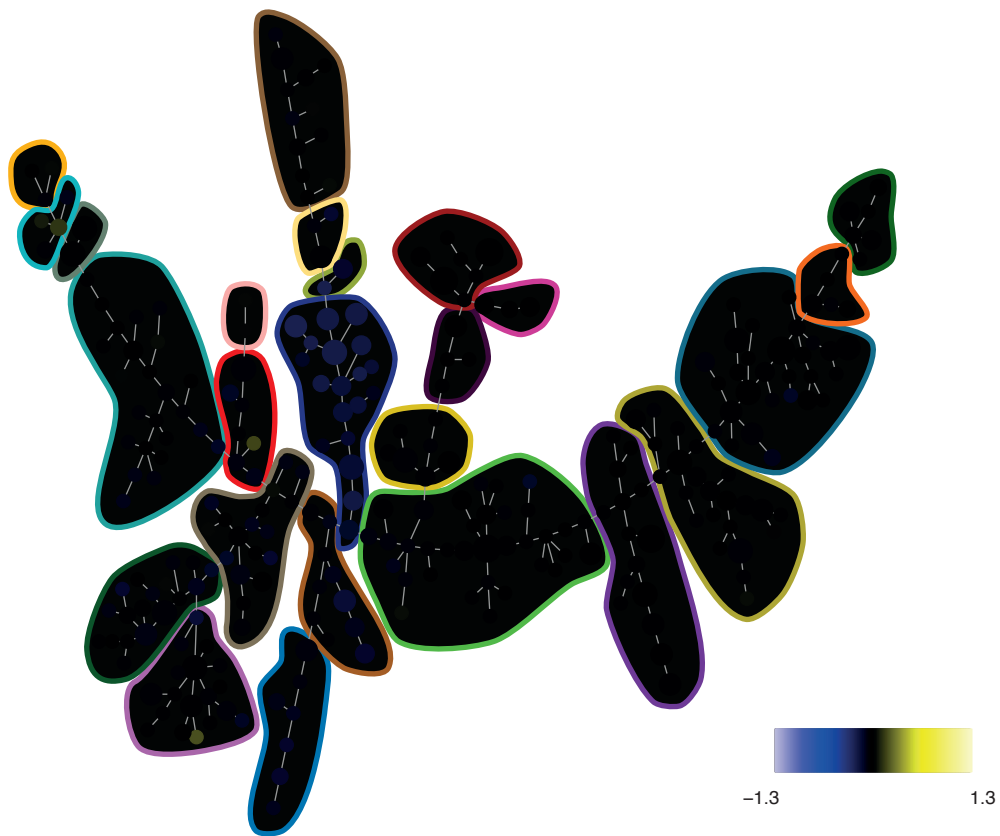



Figure S9A

164-pSLP-76 ---- GMCSF vs Ref Ratio

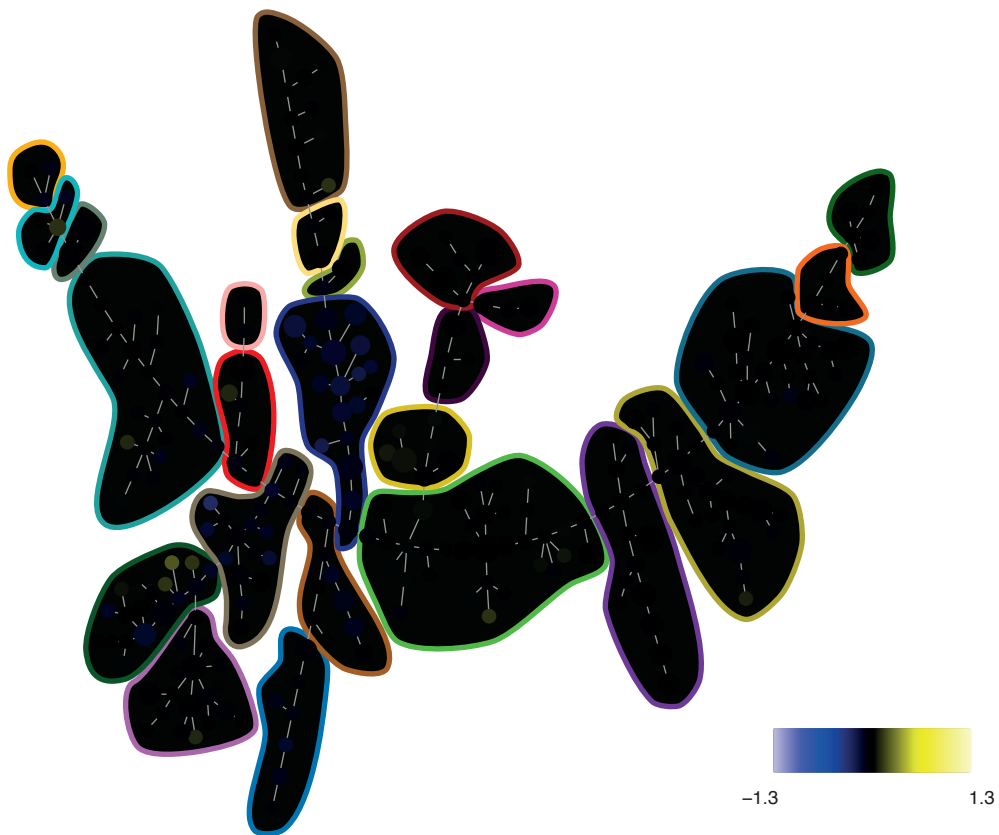

Figure S9A

164-pSLP-76 ---- IFNad vs Ref Ratio

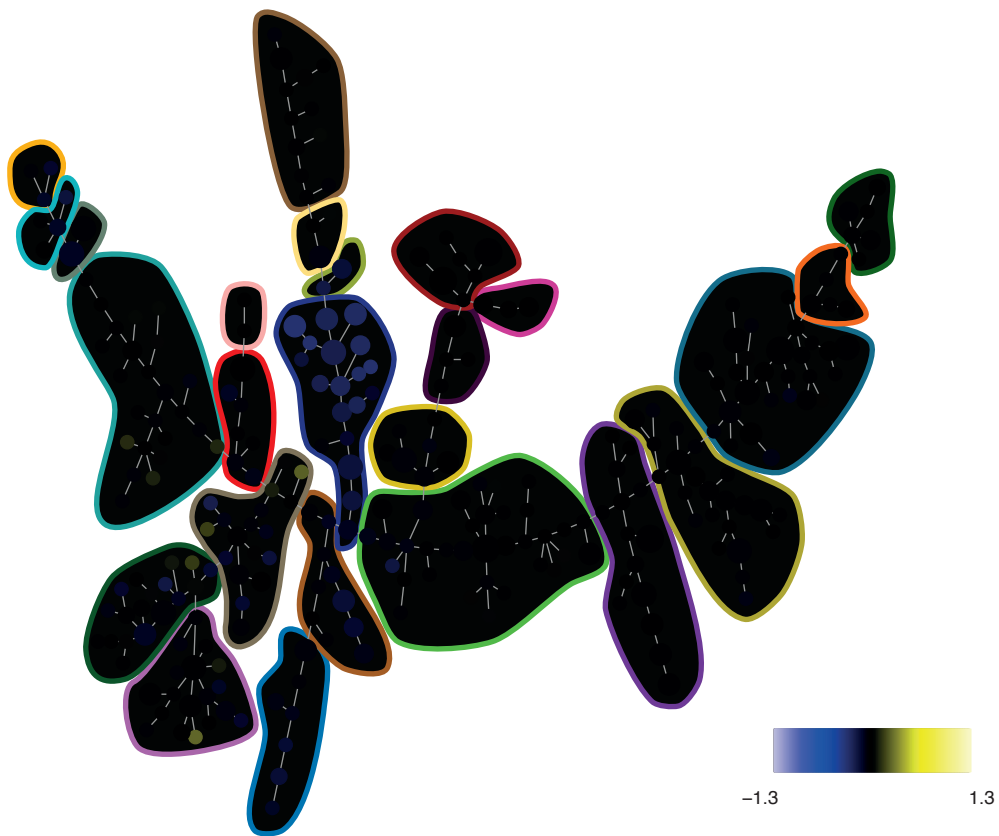

Figure S9A

164-pSLP-76 ---- IL3 vs Ref Ratio

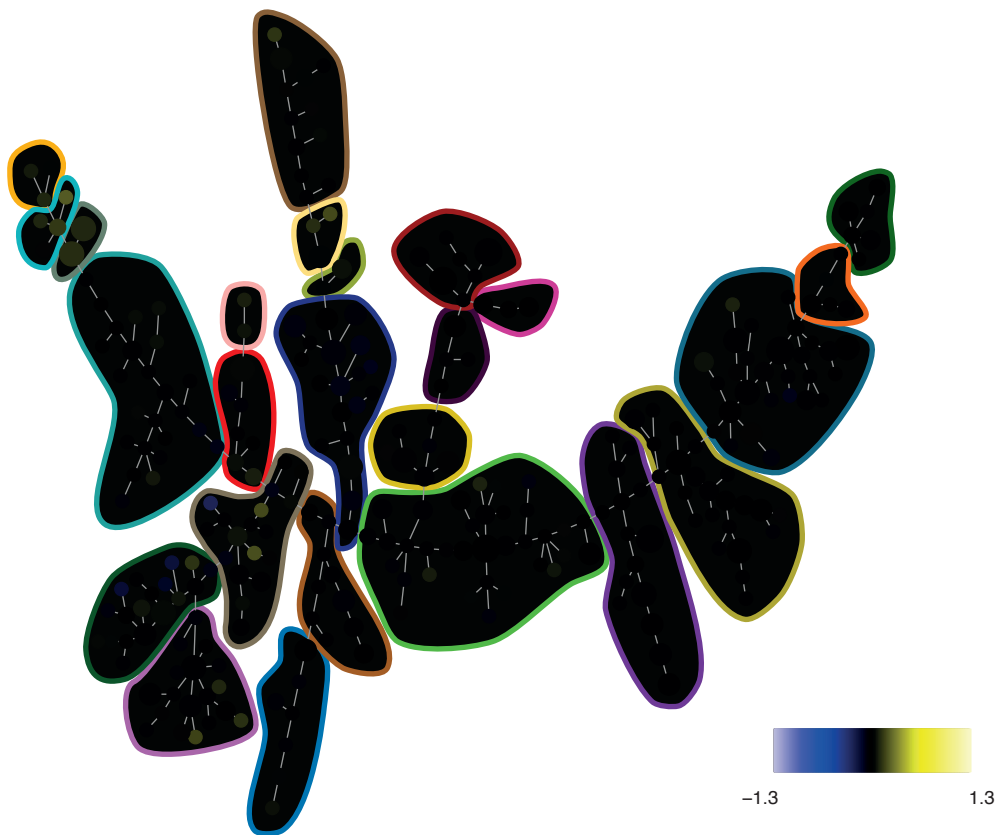

Figure S9A

164-pSLP-76 --- IL7 vs Ref Ratio

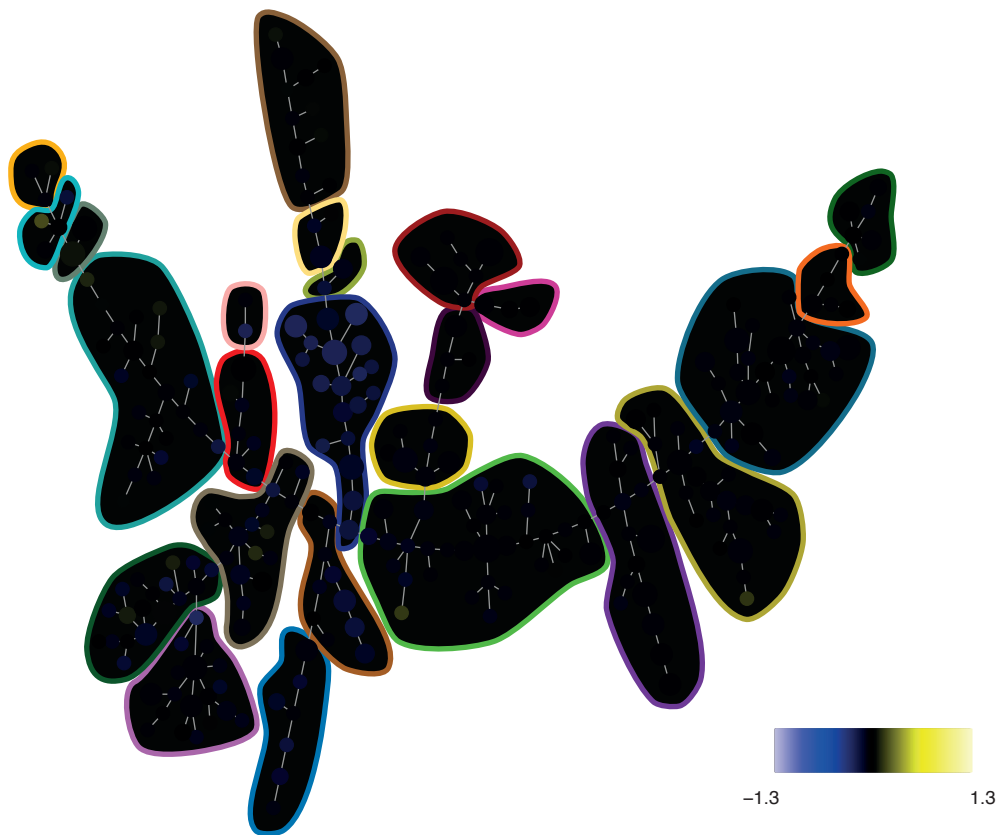

Figure S9A

164-pSLP-76 --- LPS vs Ref Ratio

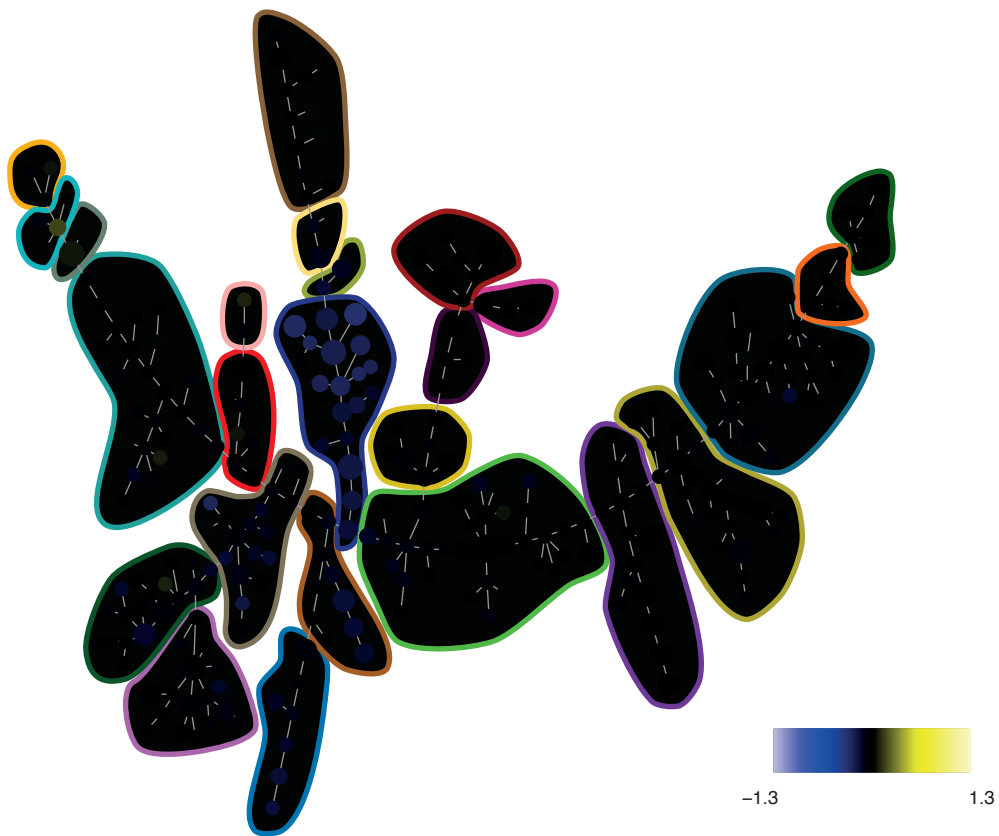

Figure S9A

164-pSLP-76 ---- PMAiono vs Ref Ratio

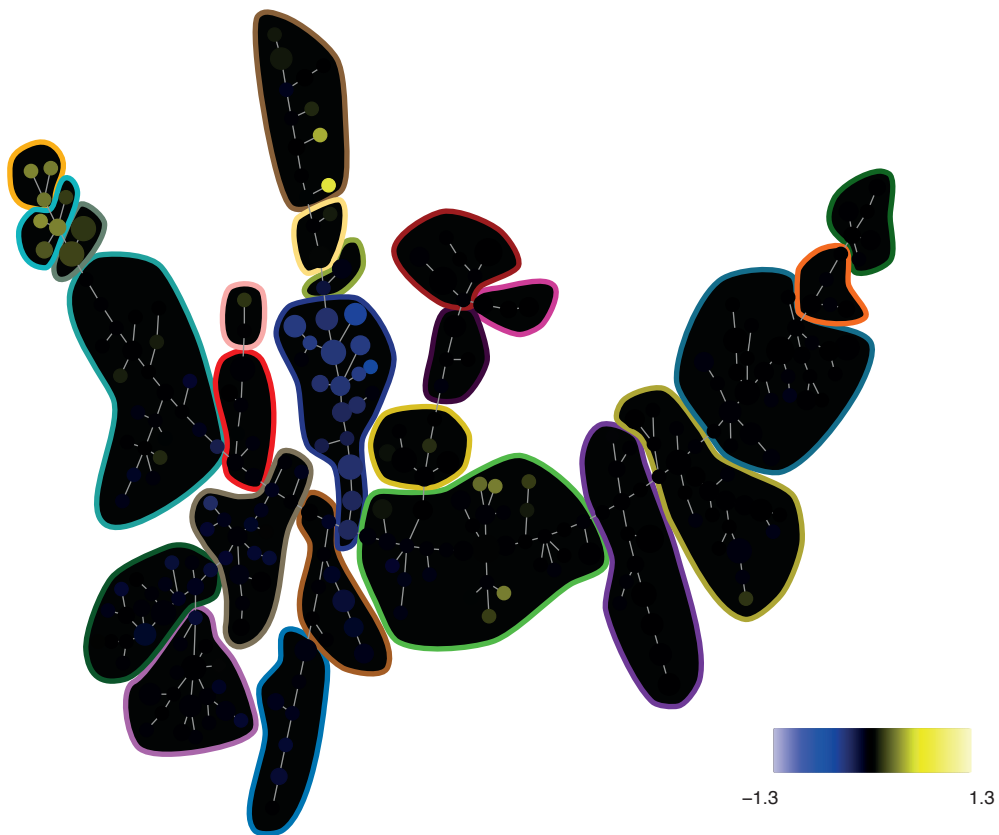

Figure S9A

164-pSLP-76 ---- PVO4 vs Ref Ratio

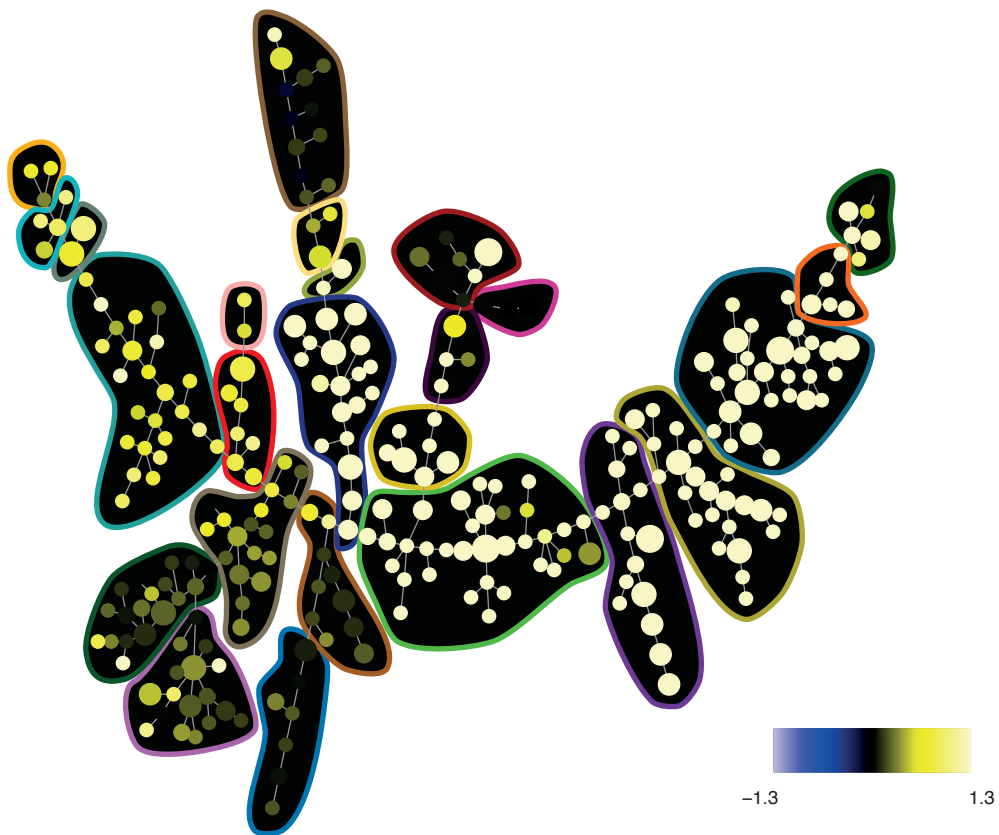

Figure S9A

164-pSLP-76 ---- SCF vs Ref Ratio

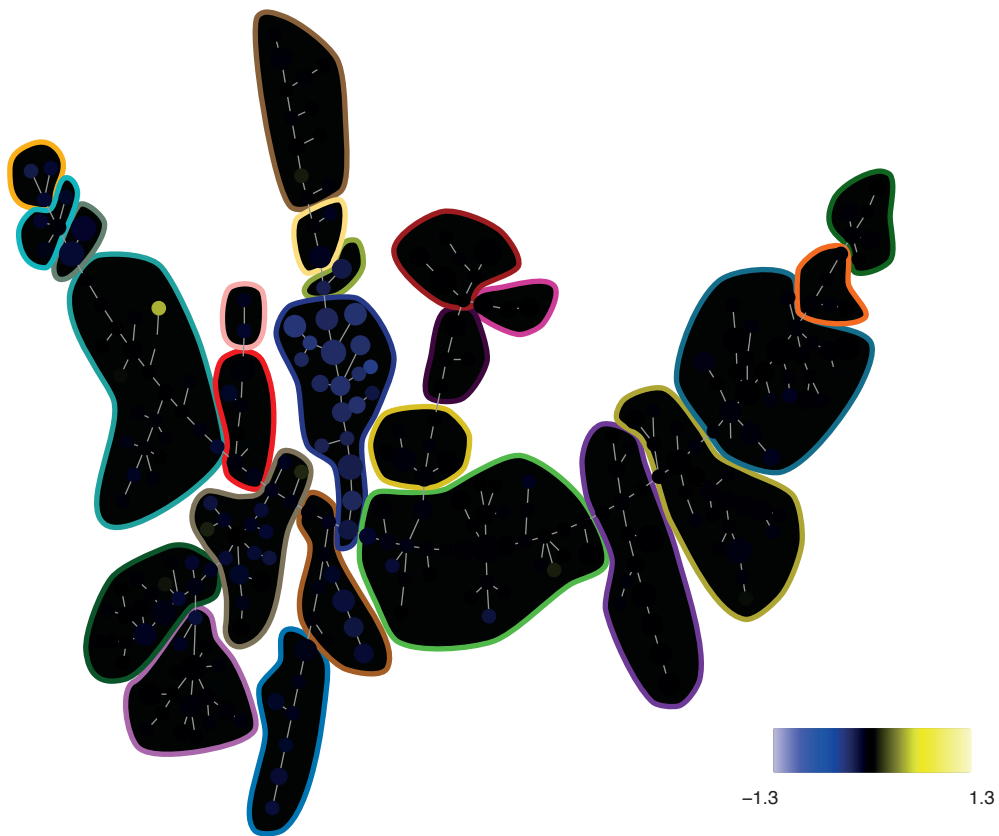



Figure S9A

164-pSLP-76 ---- TNFa vs Ref Ratio

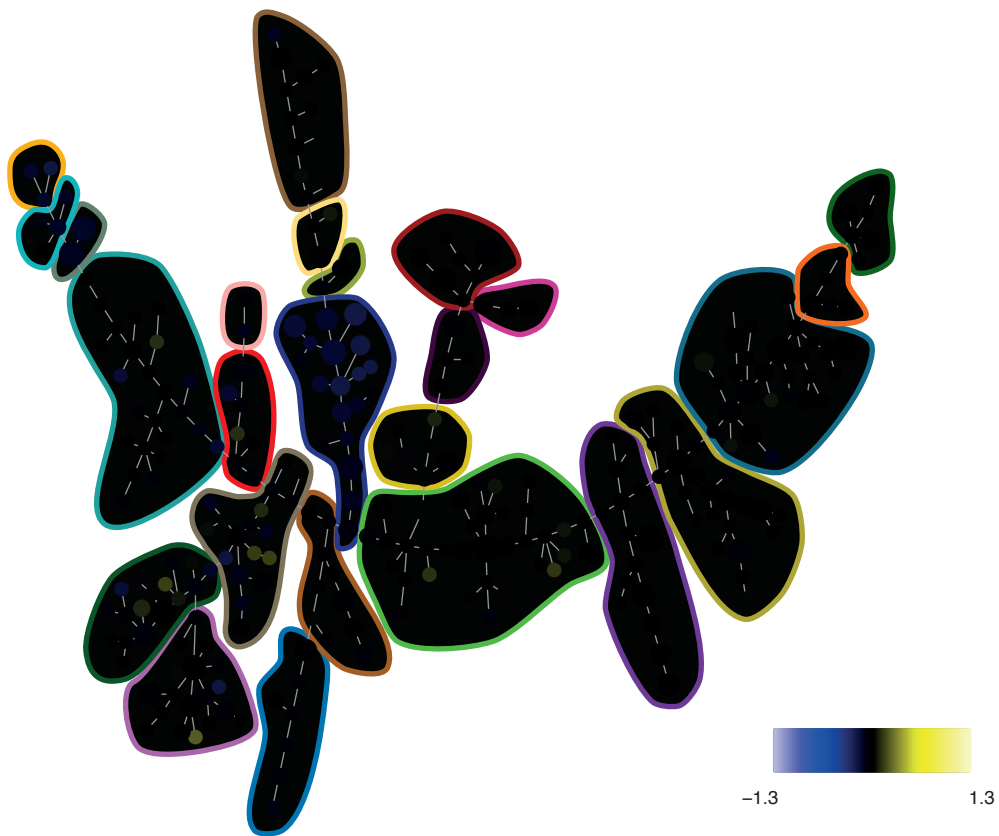

Figure S9A

164-pSLP-76 ---- TPO vs Ref Ratio

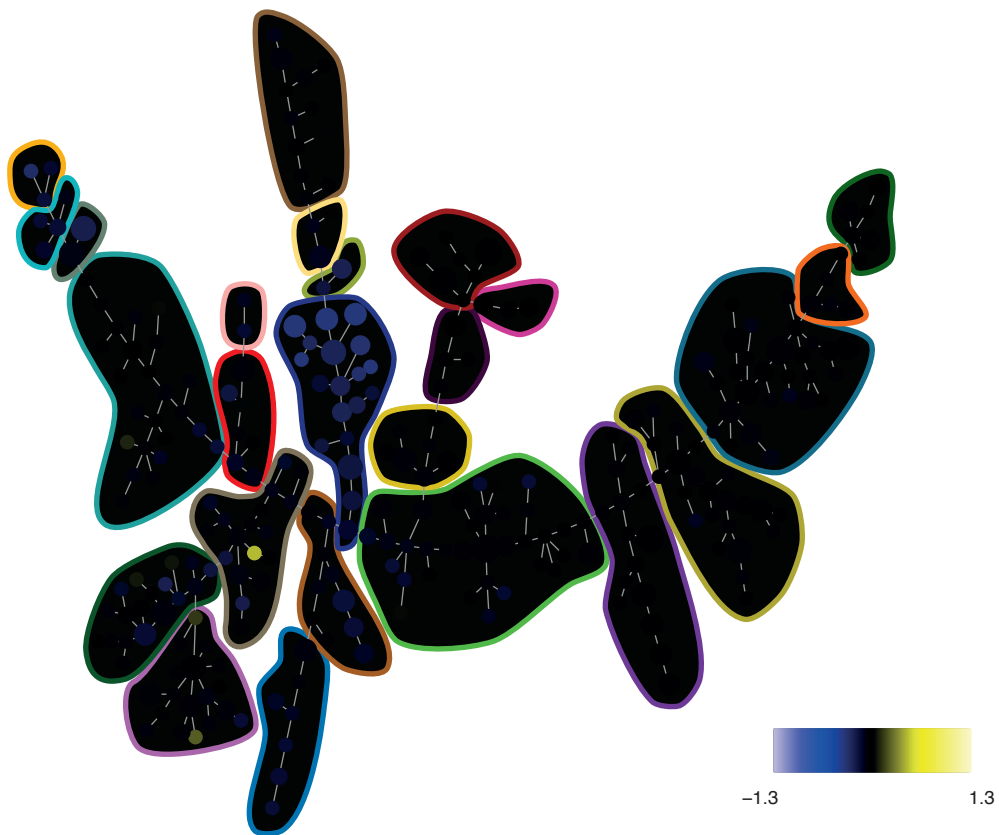

Figure S9A

165-pNFkB ---- BCR vs Ref Ratio

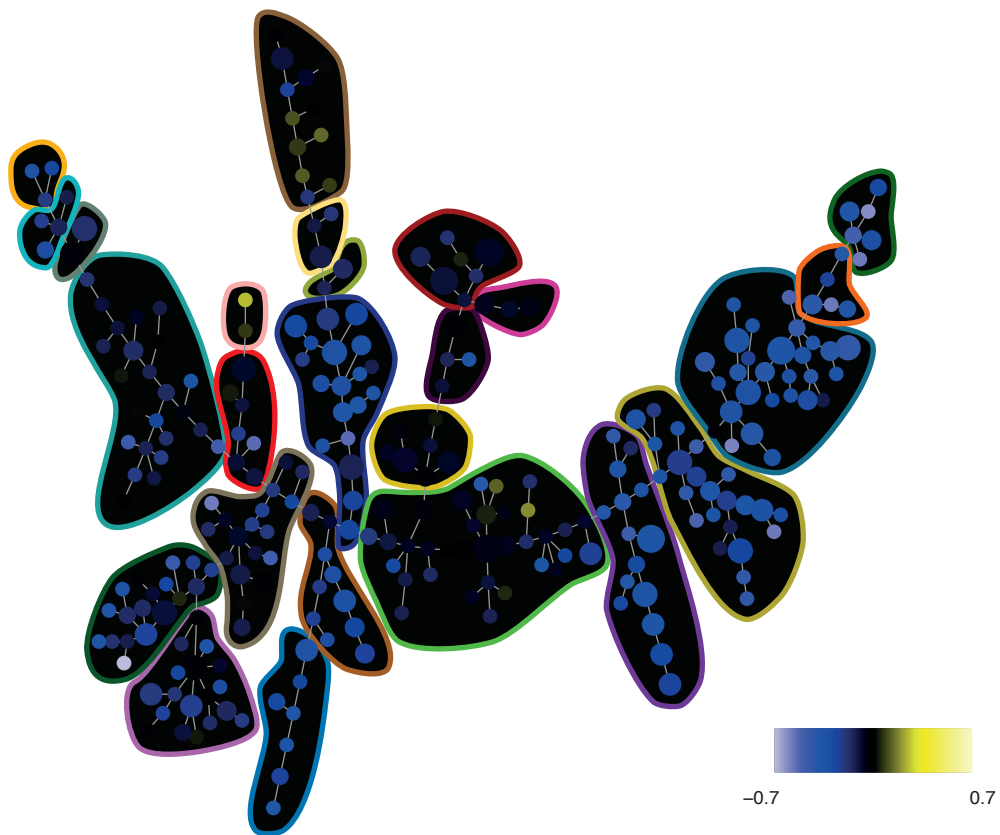

Figure S9A

165-pNFkB --- DMSO vs Ref Ratio

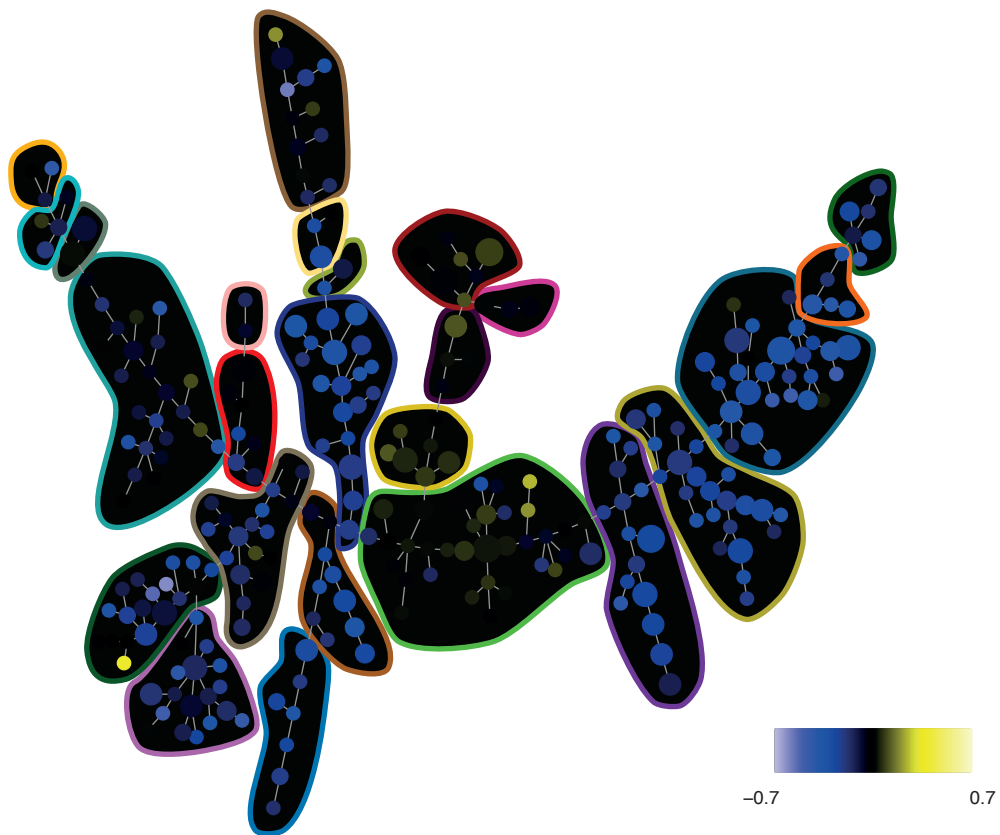

Figure S9A

165-pNFkB ---- Flt3L vs Ref Ratio

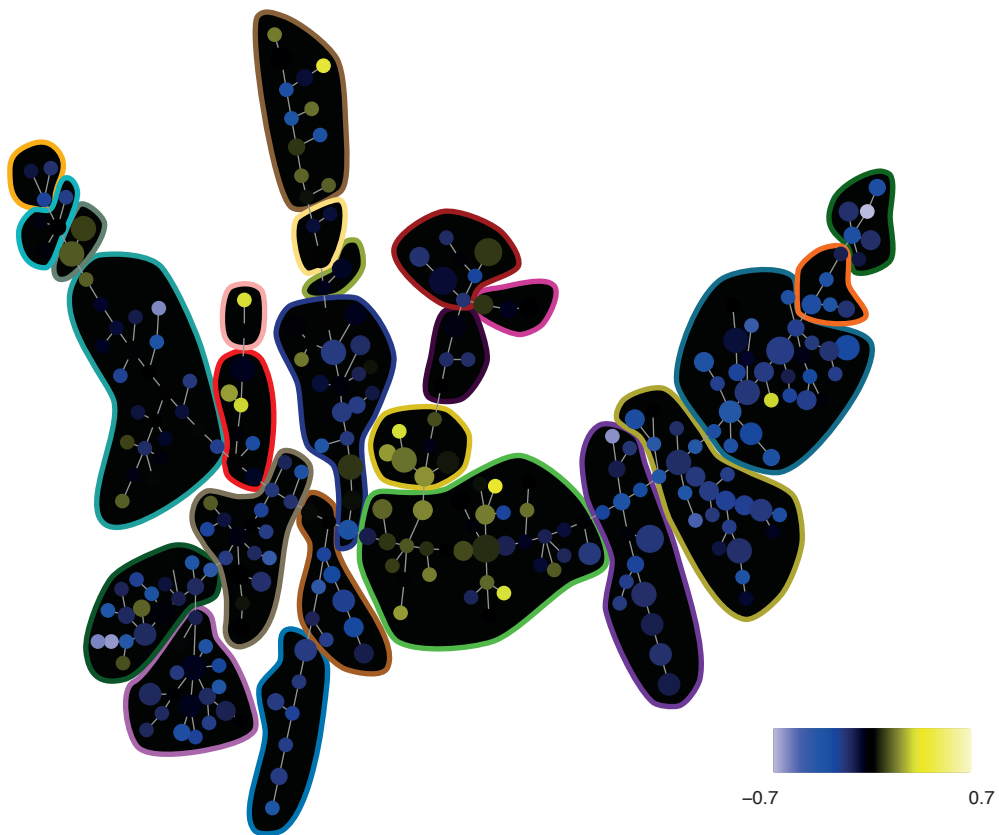

Figure S9A

165-pNFkB ---- GCSF vs Ref Ratio

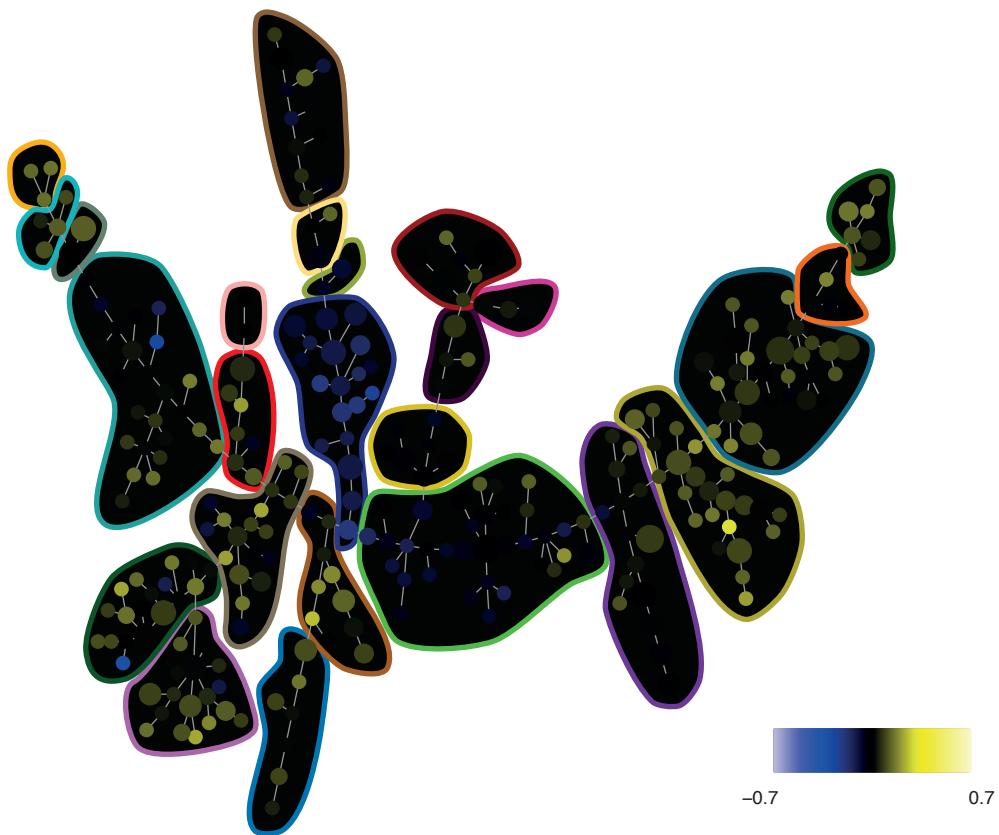

Figure S9A

165-pNFkB ---- GMCSF vs Ref Ratio

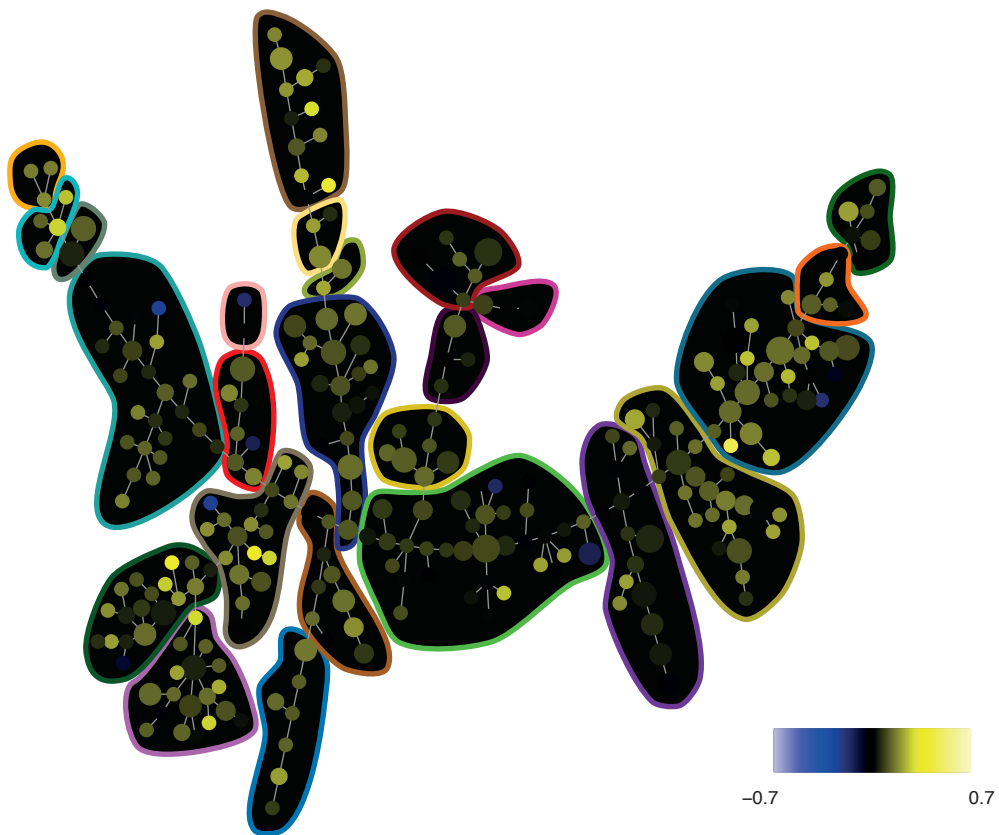

Figure S9A

165-pNFkB ---- IFNad vs Ref Ratio

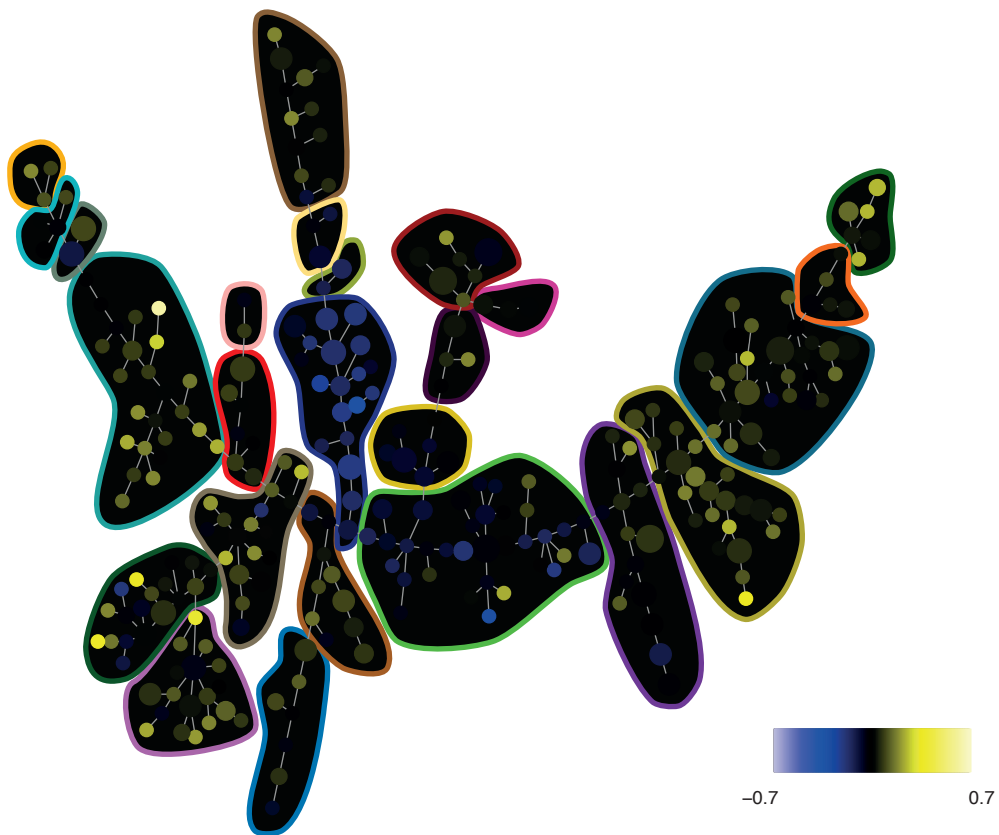



Figure S9A

165-pNFkB ---- IL3 vs Ref Ratio

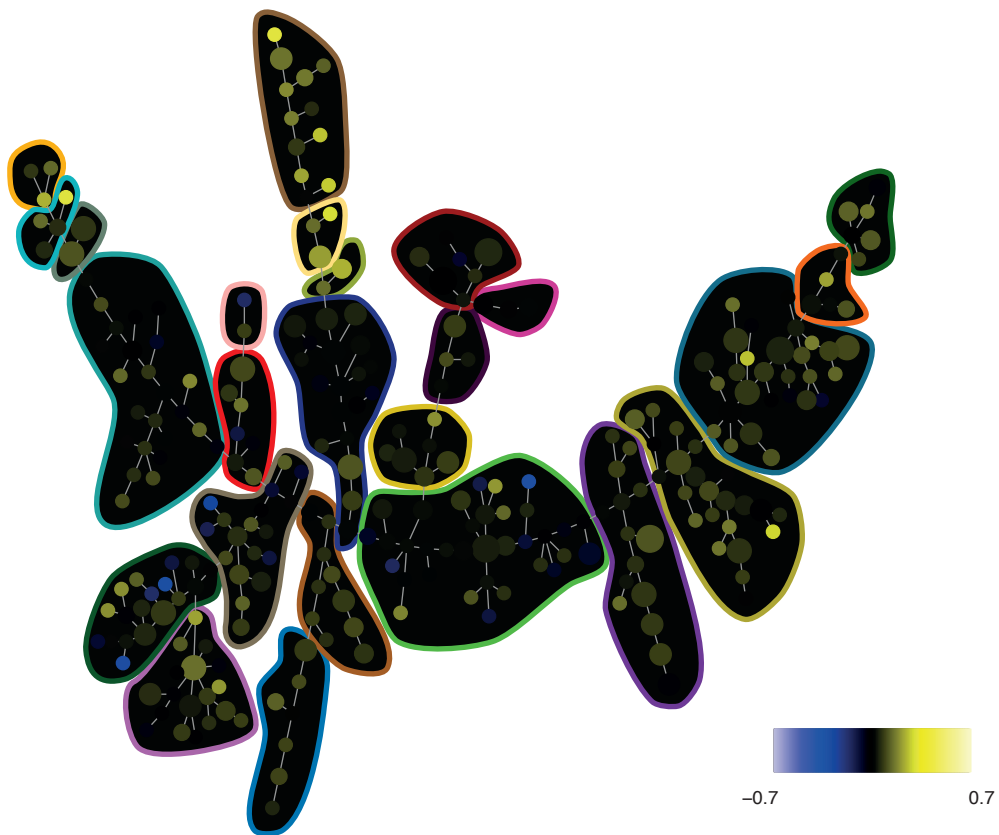

Figure S9A

165-pNFkB ---- IL7 vs Ref Ratio

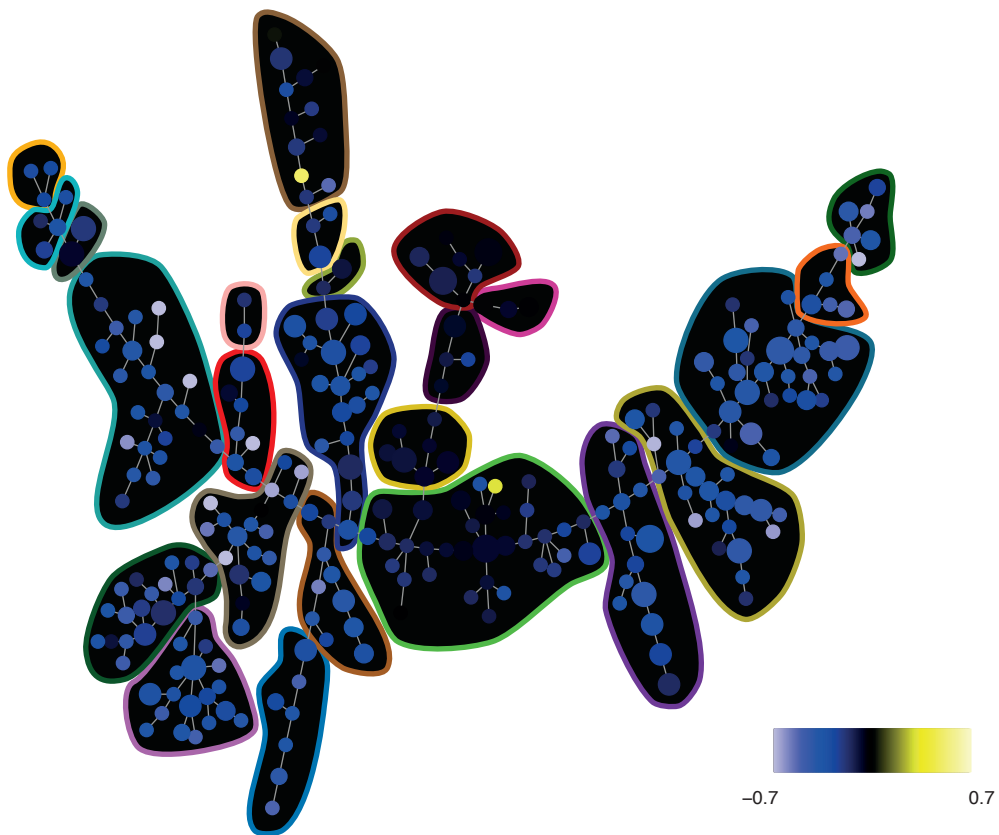

Figure S9A

165-pNFkB --- LPS vs Ref Ratio

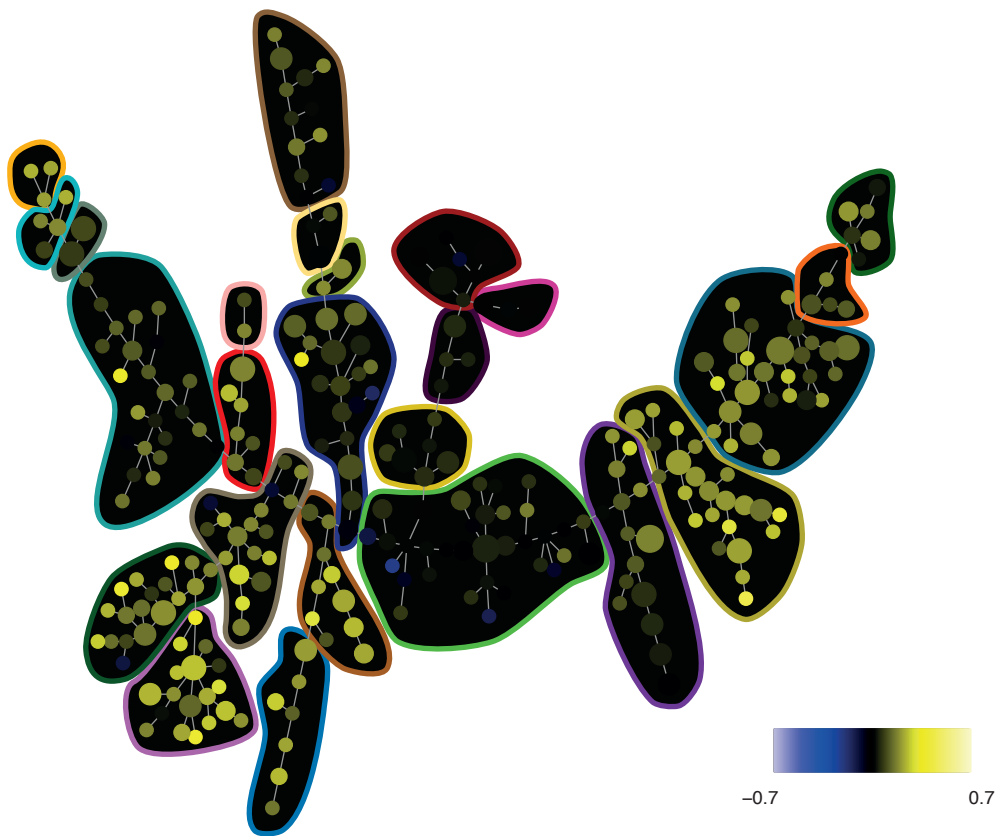

Figure S9A

165-pNFkB ---- PMAiono vs Ref Ratio

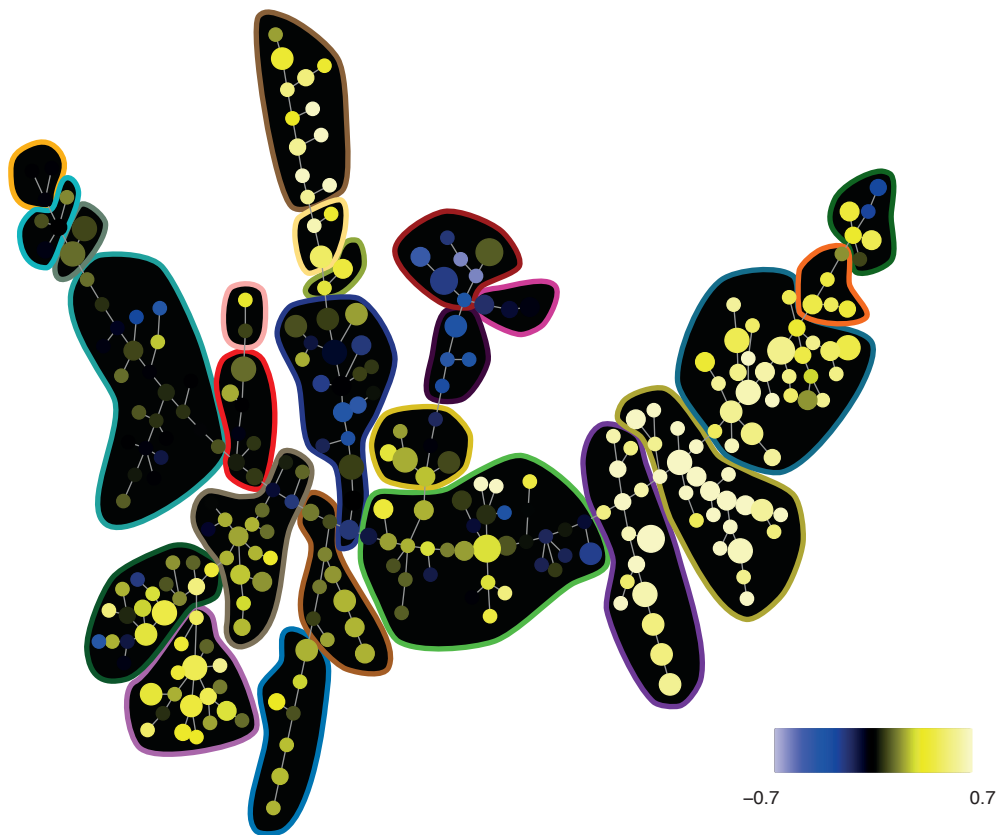

Figure S9A

165-pNFkB ---- PVO4 vs Ref Ratio

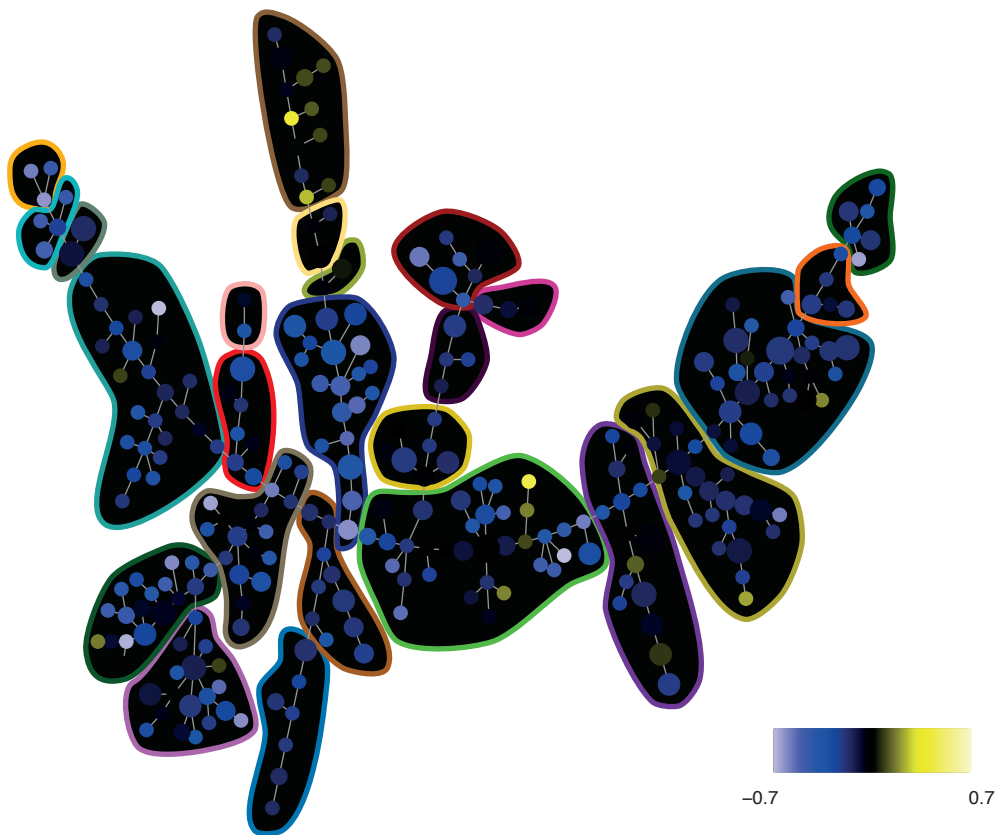

Figure S9A

165-pNFkB --- SCF vs Ref Ratio

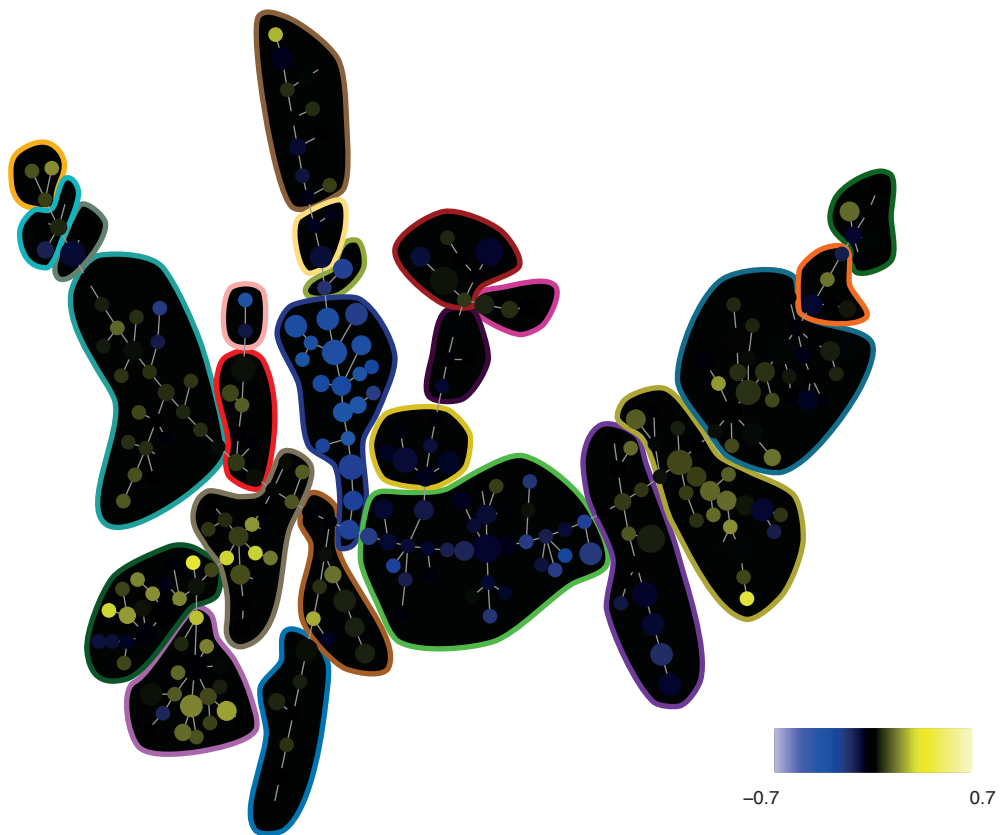

Figure S9A

165-pNFkB ---- TNFa vs Ref Ratio

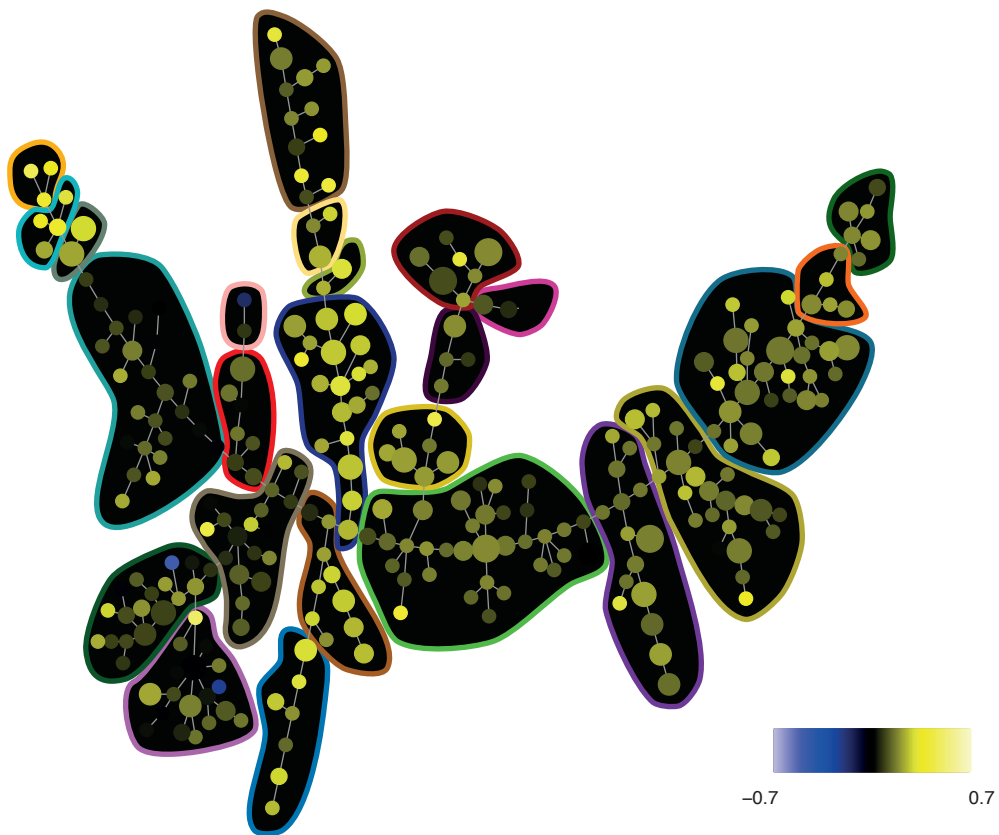

Figure S9A

165-pNFkB --- TPO vs Ref Ratio

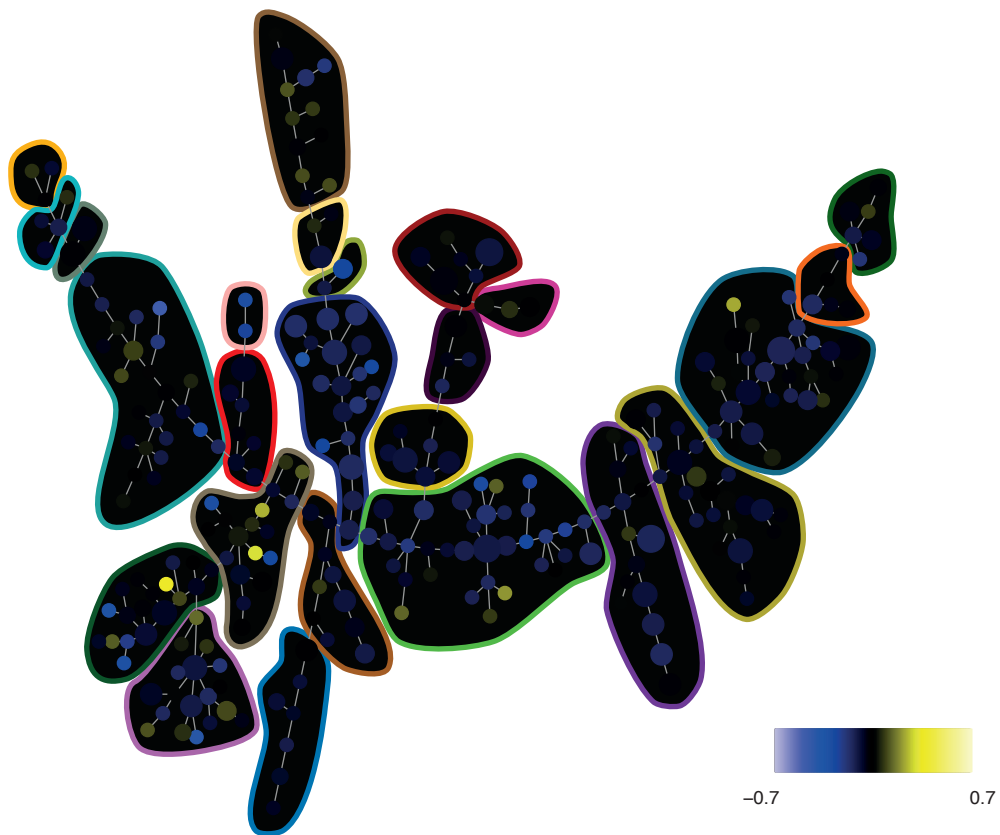



Figure S9A

166-lkBalpha ---- BCR vs Ref Ratio

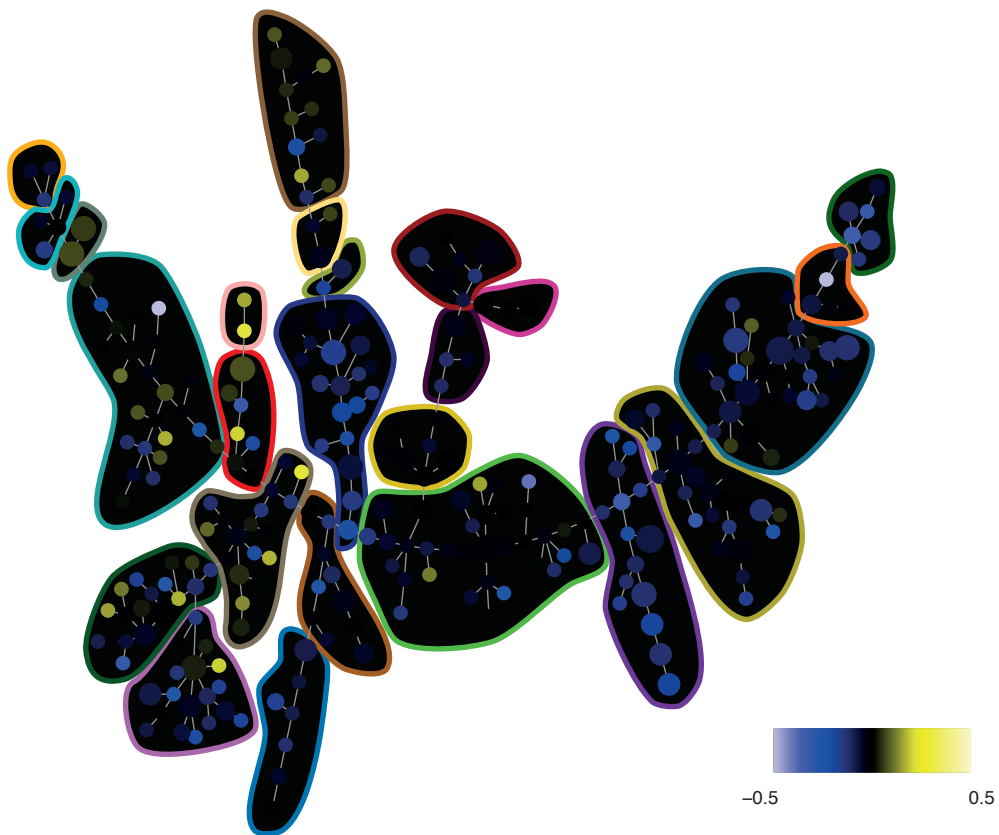

Figure S9A

166-IkBalpha ---- DMSO vs Ref Ratio

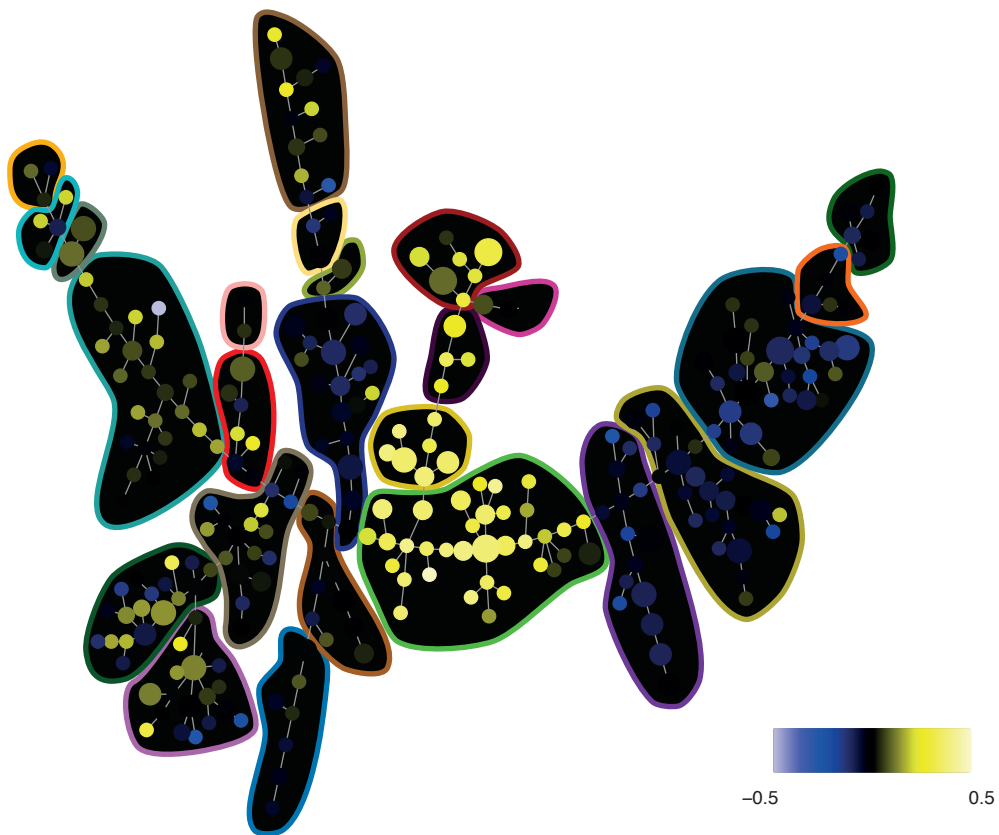

Figure S9A

166-lkBalpha ---- Flt3L vs Ref Ratio

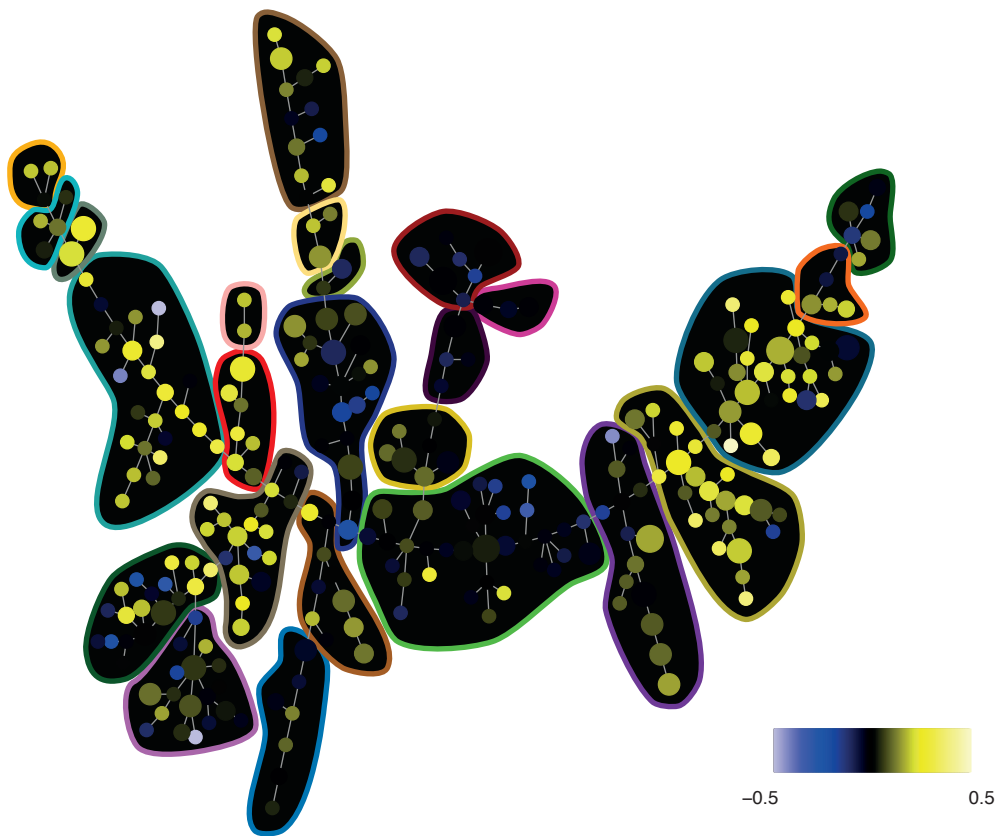

Figure S9A

166-IkBalpha --- GCSF vs Ref Ratio

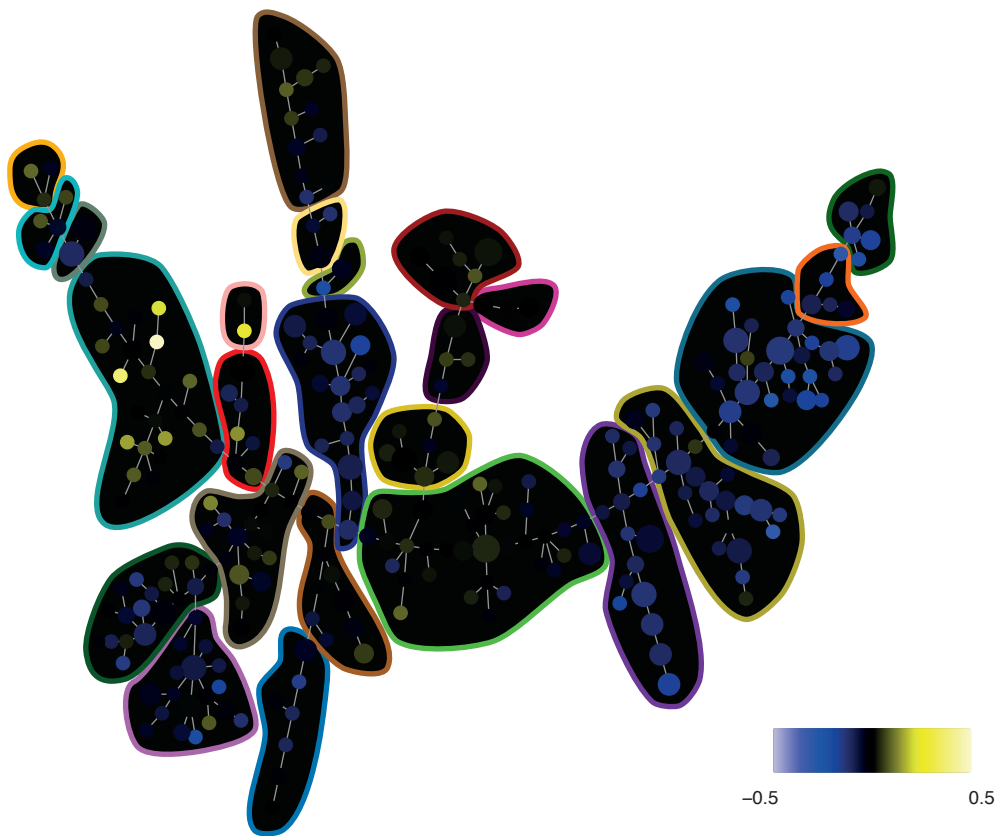

Figure S9A

166-lkBalpha ---- GMCSF vs Ref Ratio

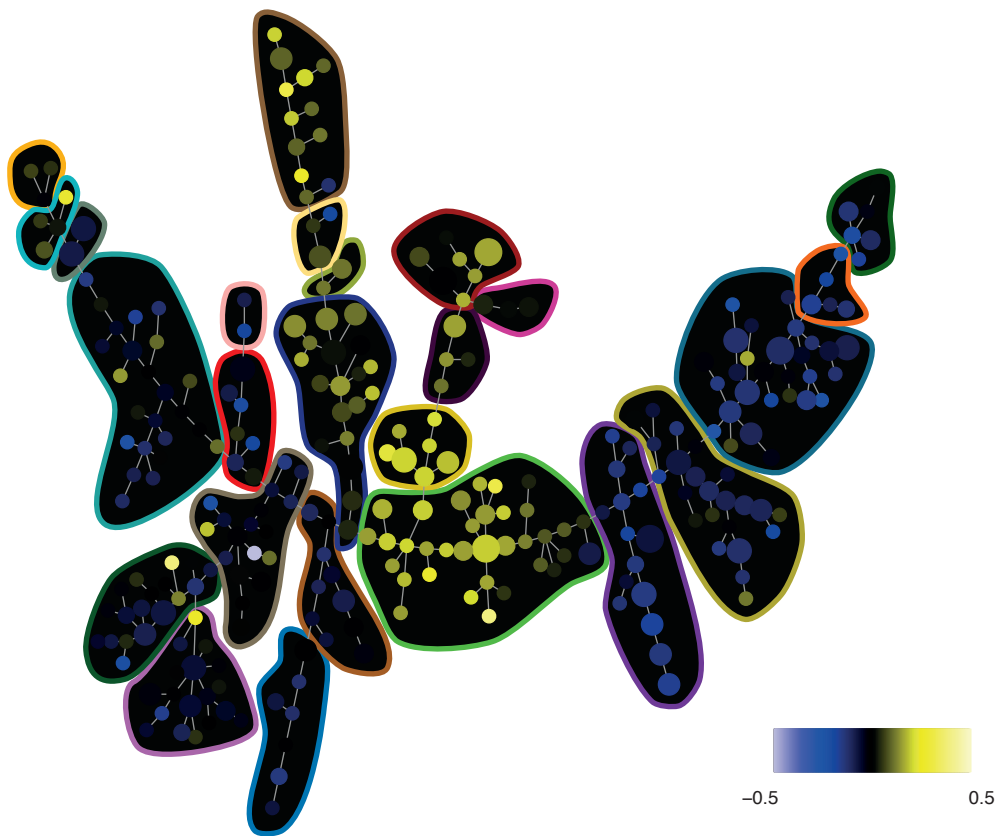

Figure S9A

166-IkBalpa --- IFNad vs Ref Ratio

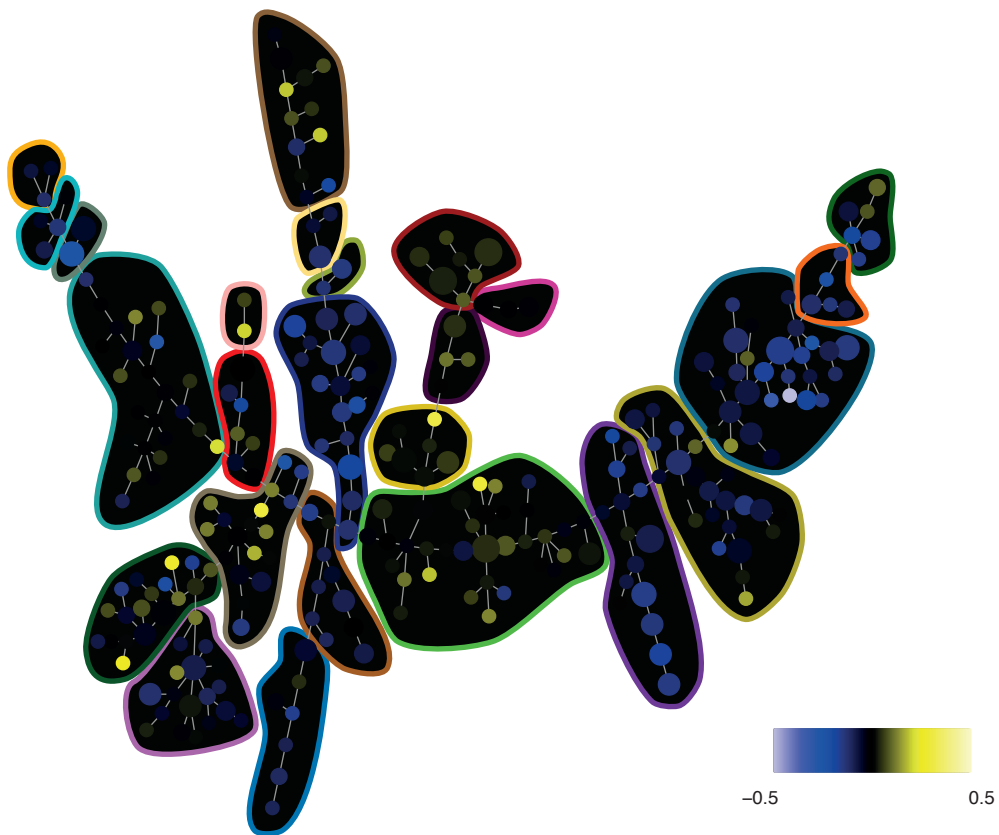

Figure S9A

166-IkBalpha ---- IL3 vs Ref Ratio

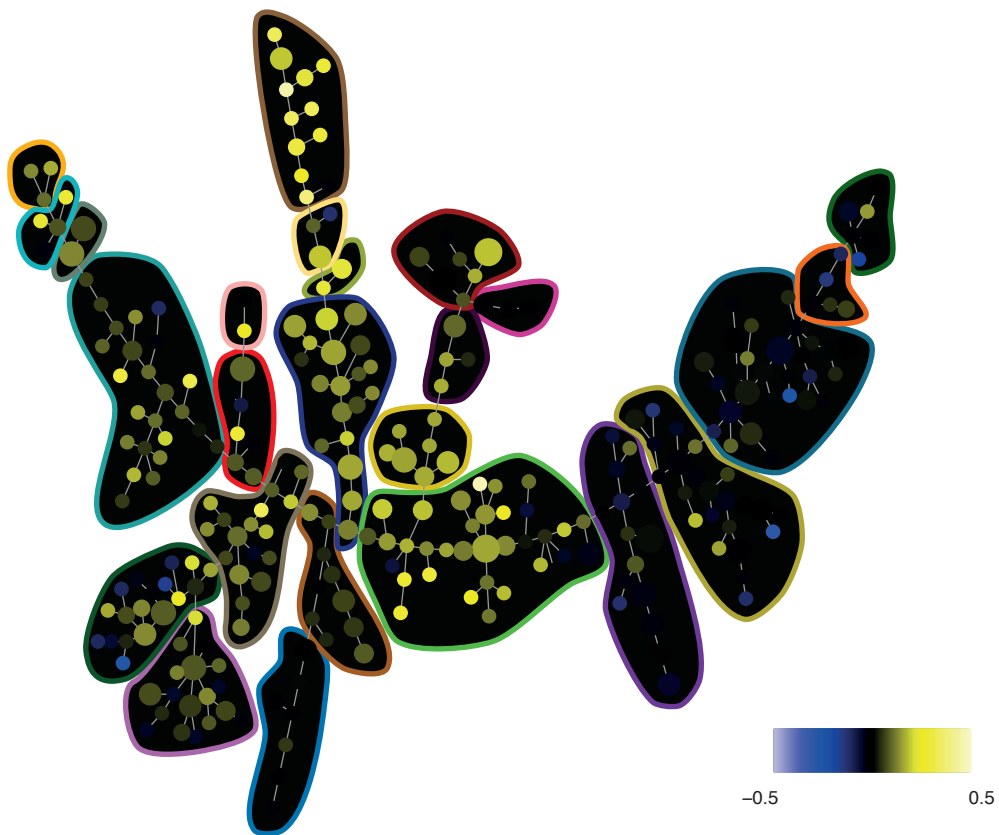

Figure S9A

166-IkBalpha ---- IL7 vs Ref Ratio

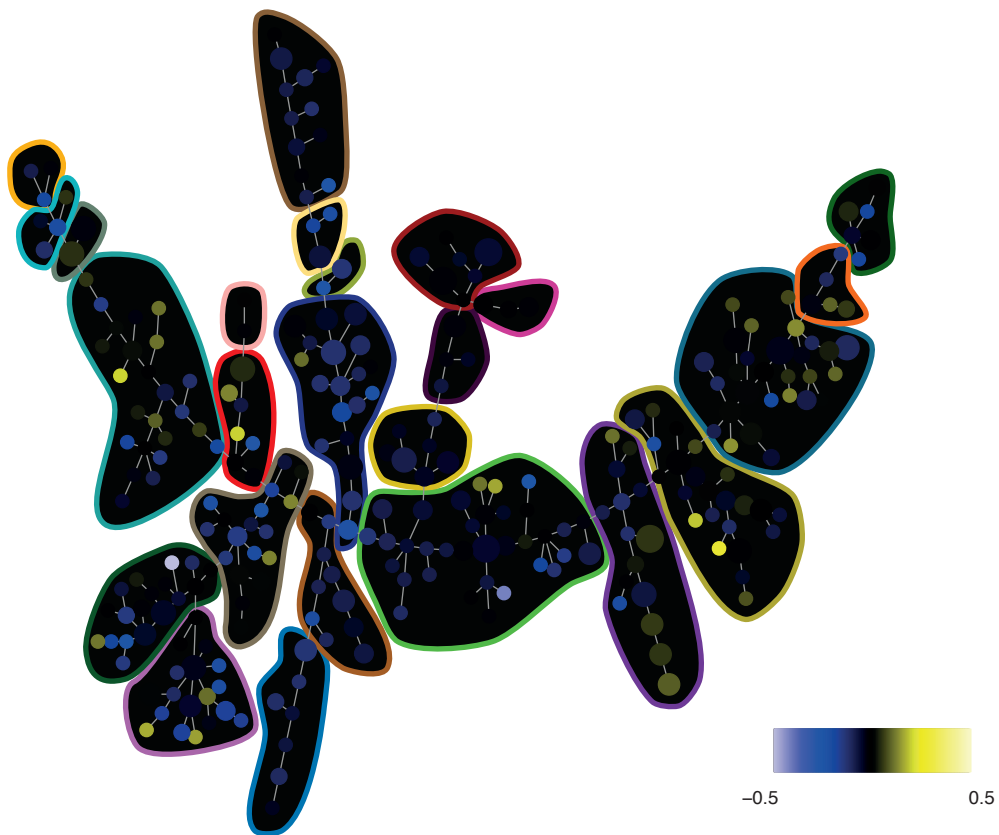



Figure S9A

166-lkBalpha ---- LPS vs Ref Ratio

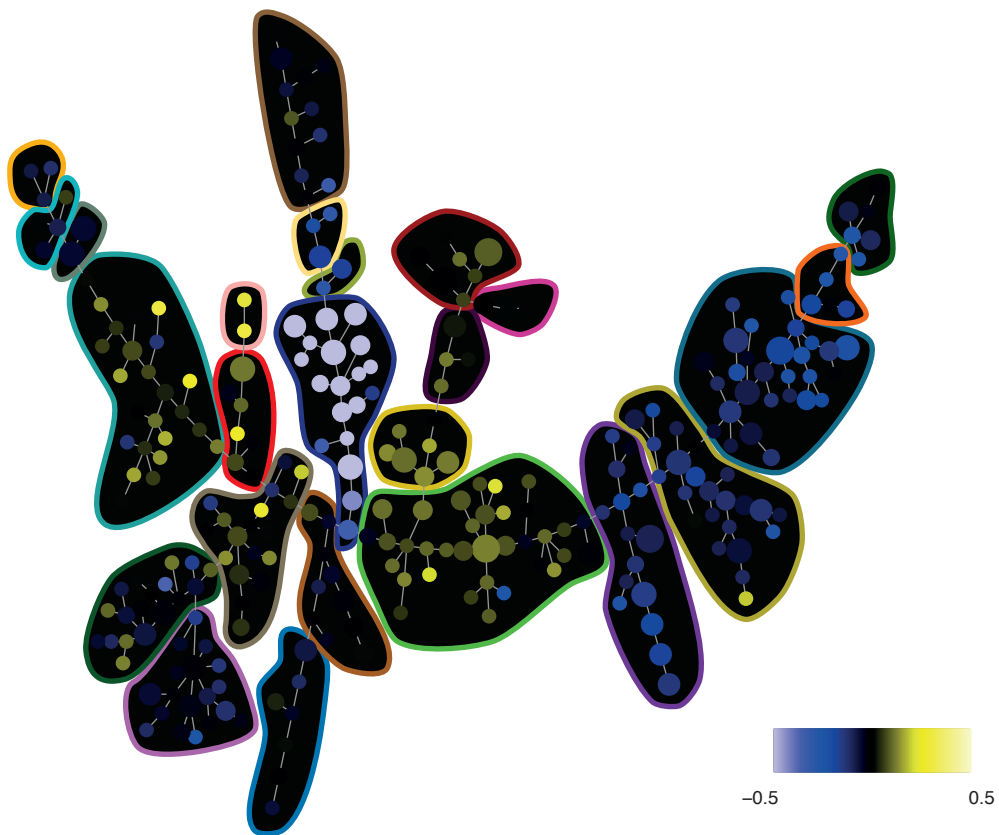

Figure S9A

166-IkBalpha ---- PMAiono vs Ref Ratio

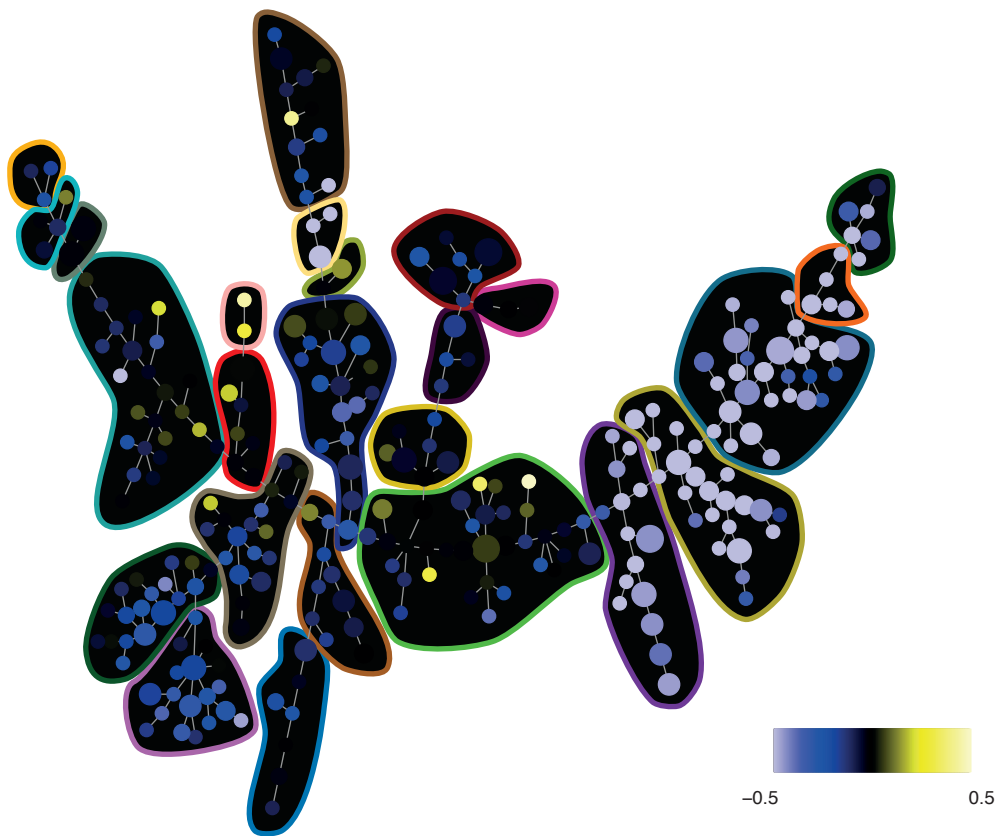

Figure S9A

166-IkBalpa ---- PVO4 vs Ref Ratio

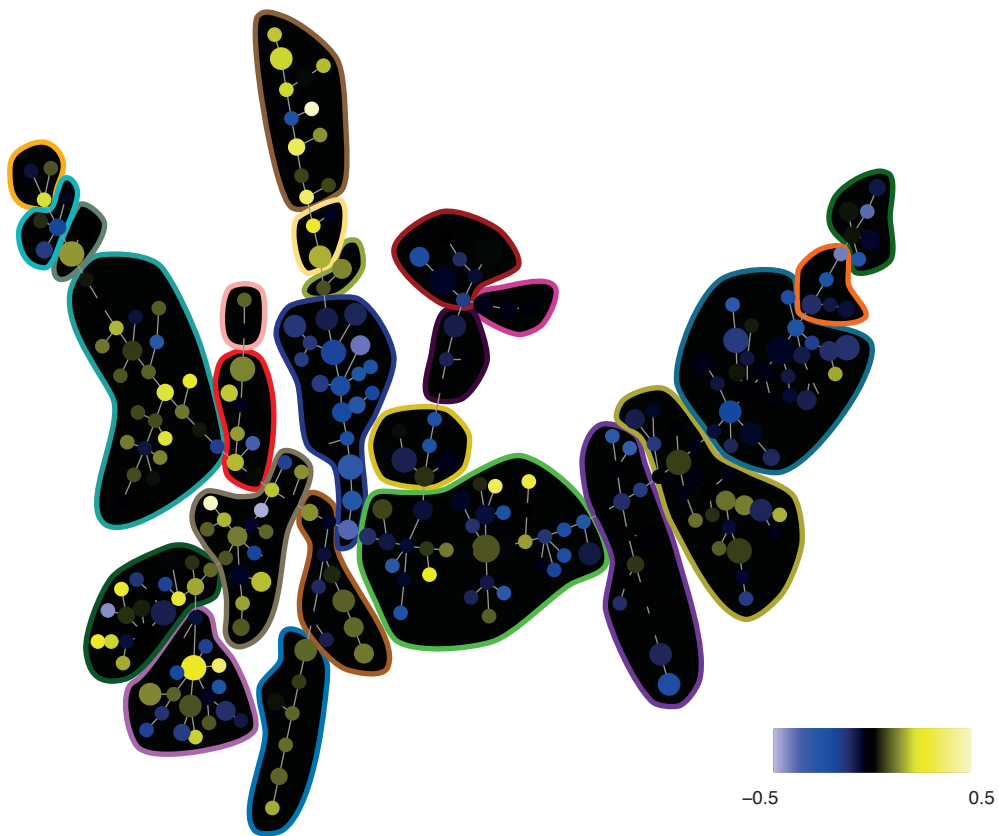

Figure S9A

166-lkBalpha ---- SCF vs Ref Ratio

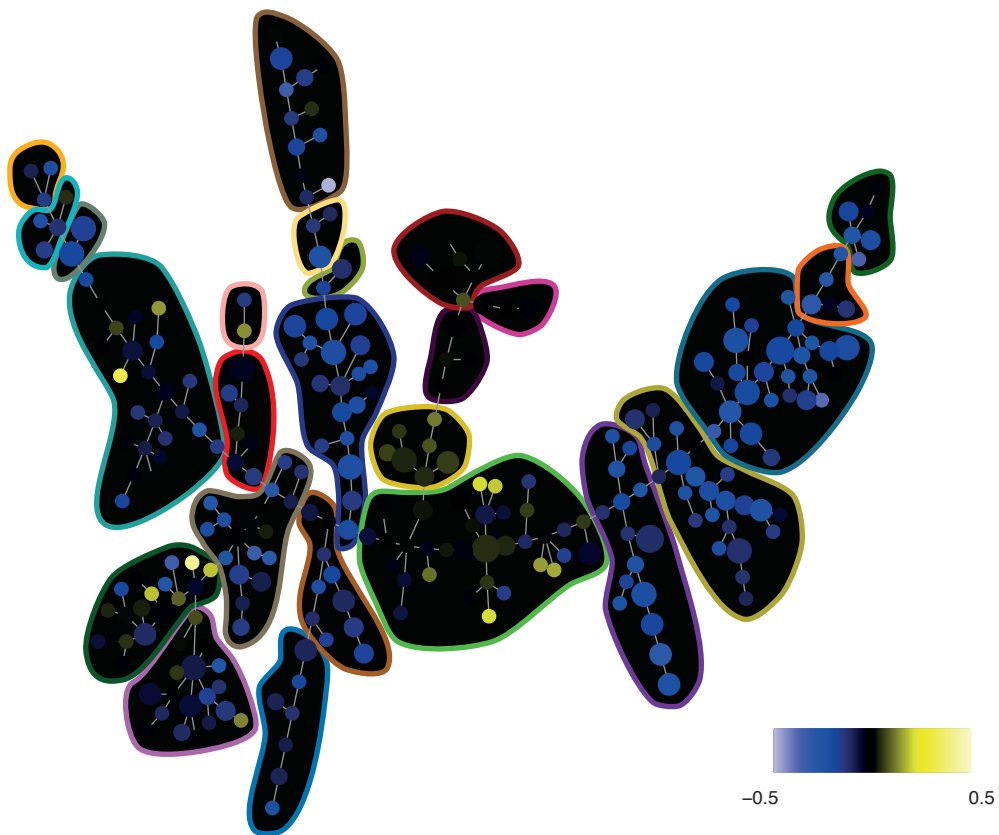

Figure S9A

166-lkBaIpha ---- TNFa vs Ref Ratio

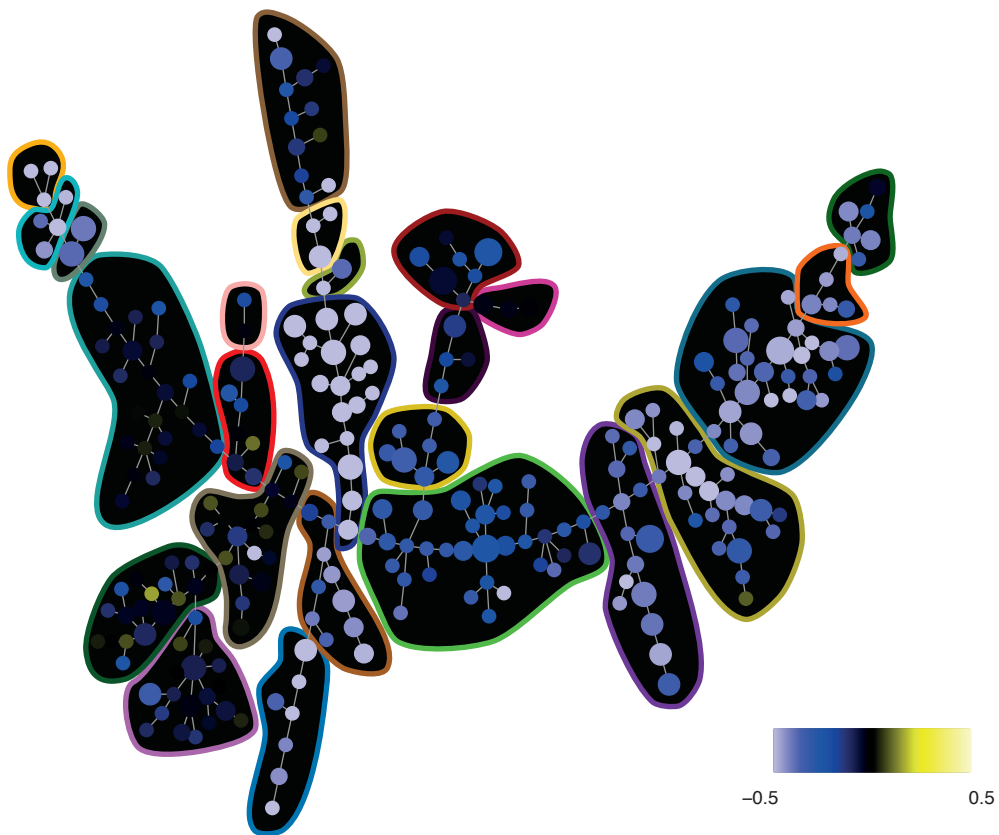

Figure S9A

166-lkBalpha ---- TPO vs Ref Ratio

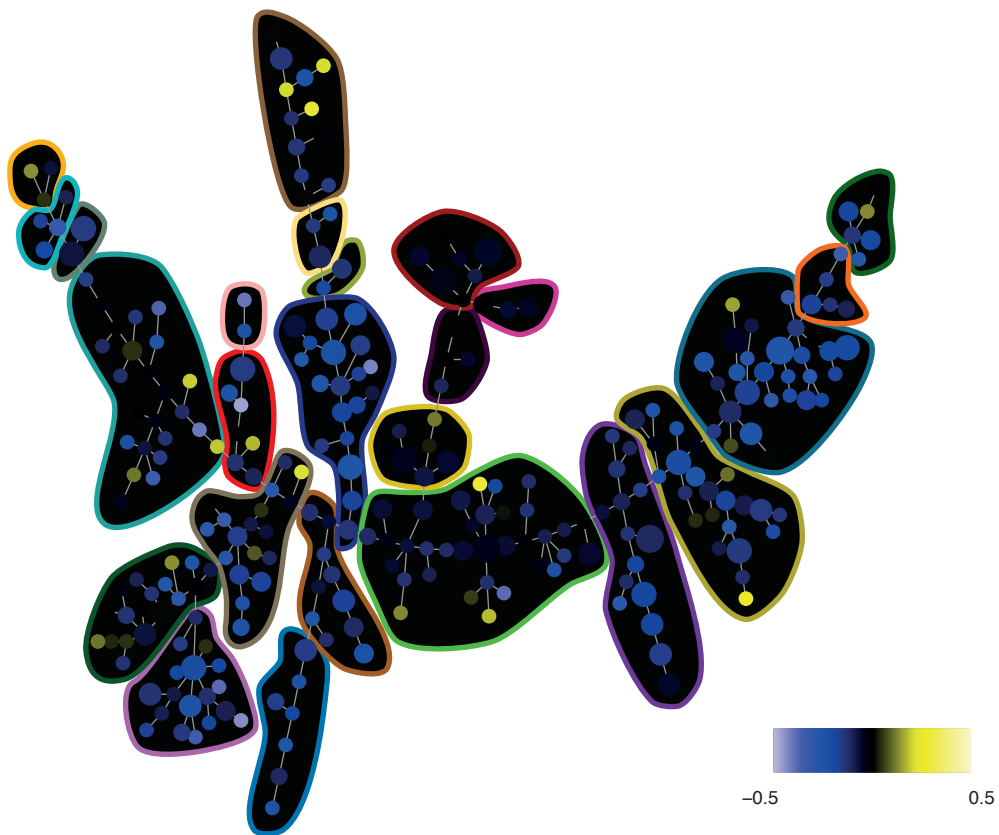

Figure S9A

168-pH3 ---- BCR vs Ref Ratio

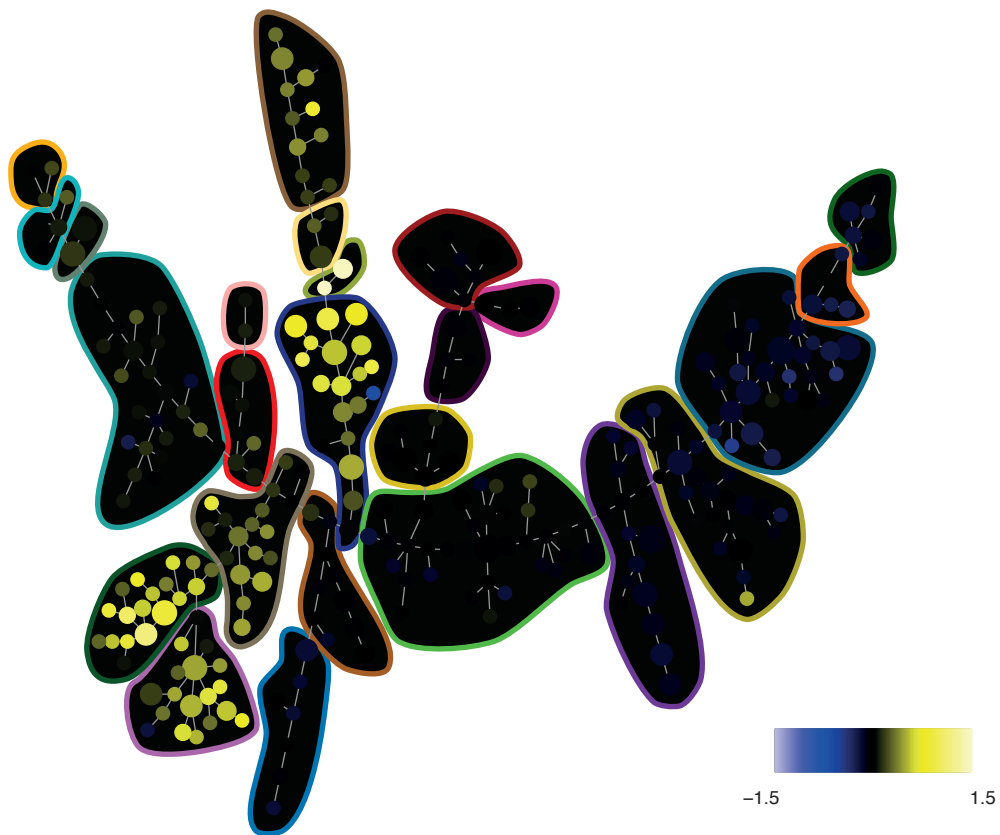

Figure S9A

168-pH3 --- DMSO vs Ref Ratio

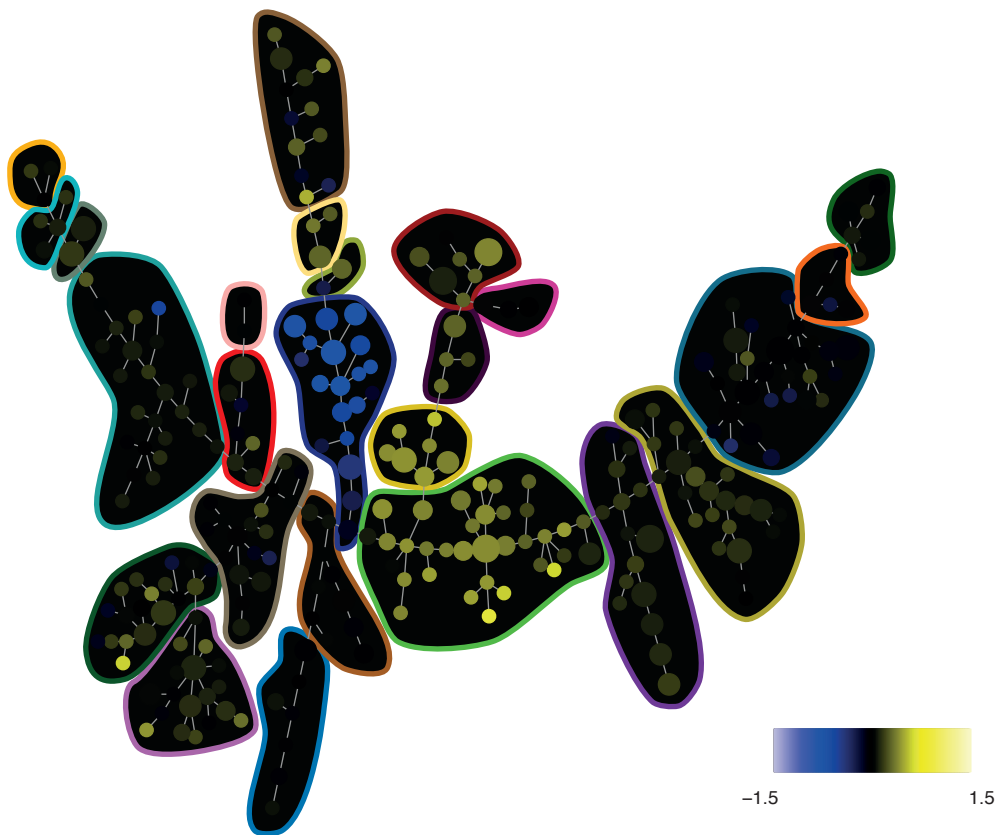



Figure S9A

168-pH3 ---- Flt3L vs Ref Ratio

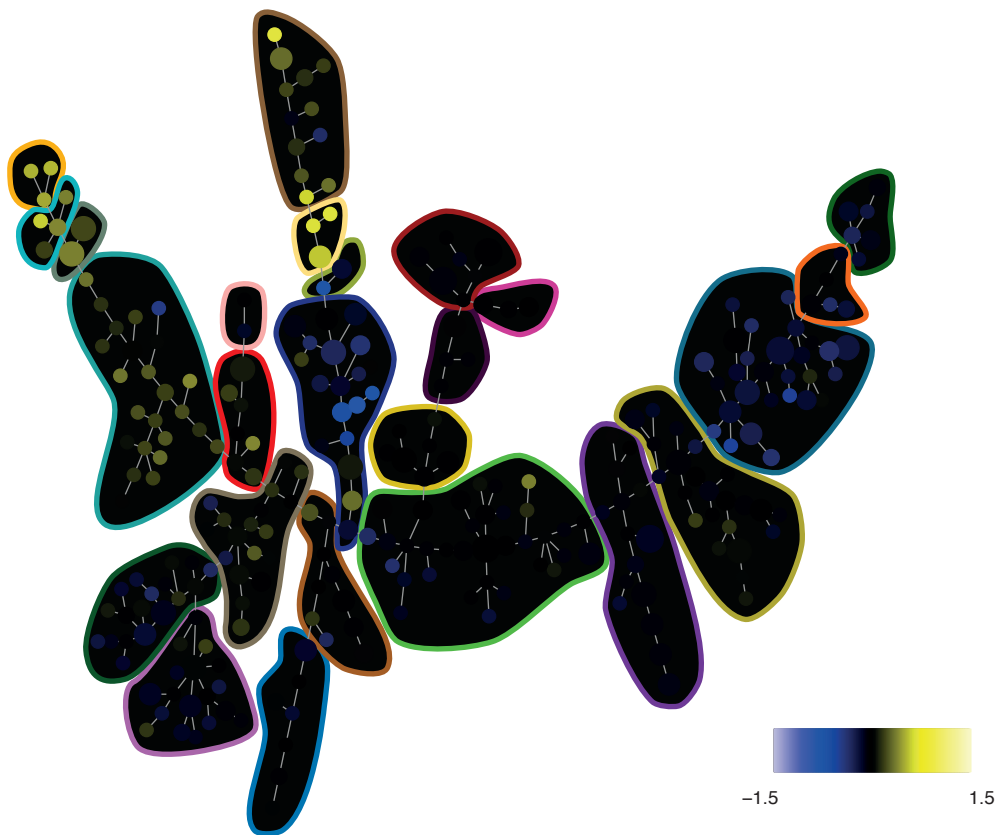

Figure S9A

168-pH3 ---- GCSF vs Ref Ratio

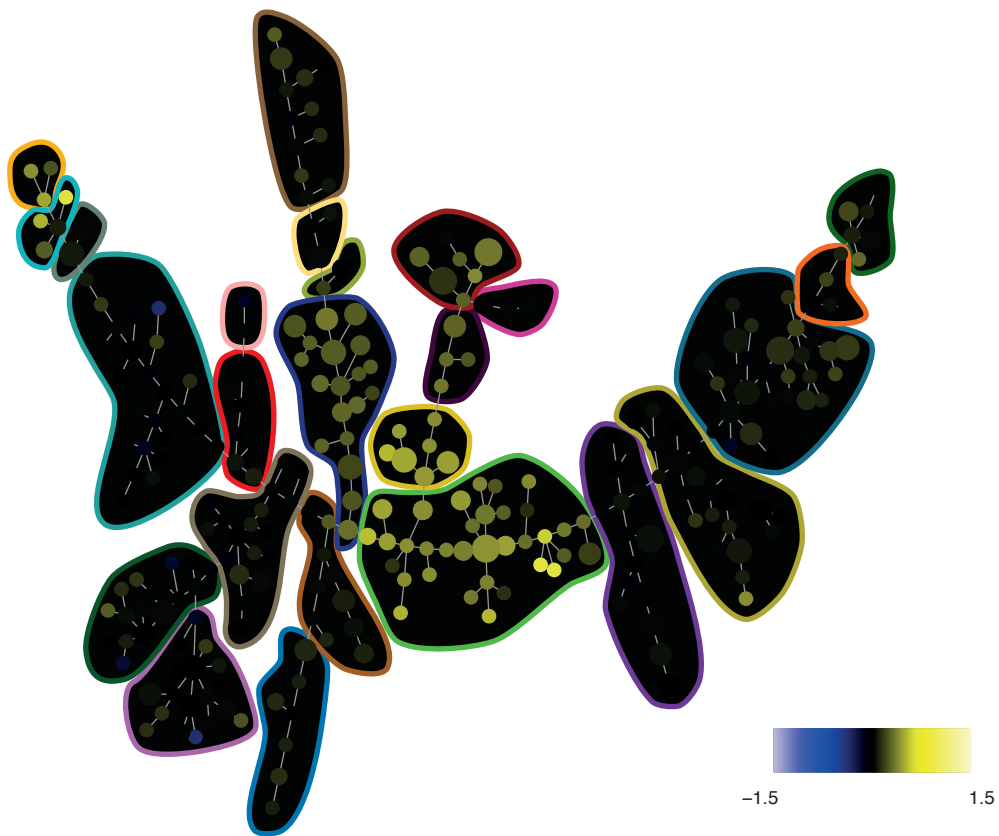

Figure S9A

168-pH3 ---- GMCSF vs Ref Ratio

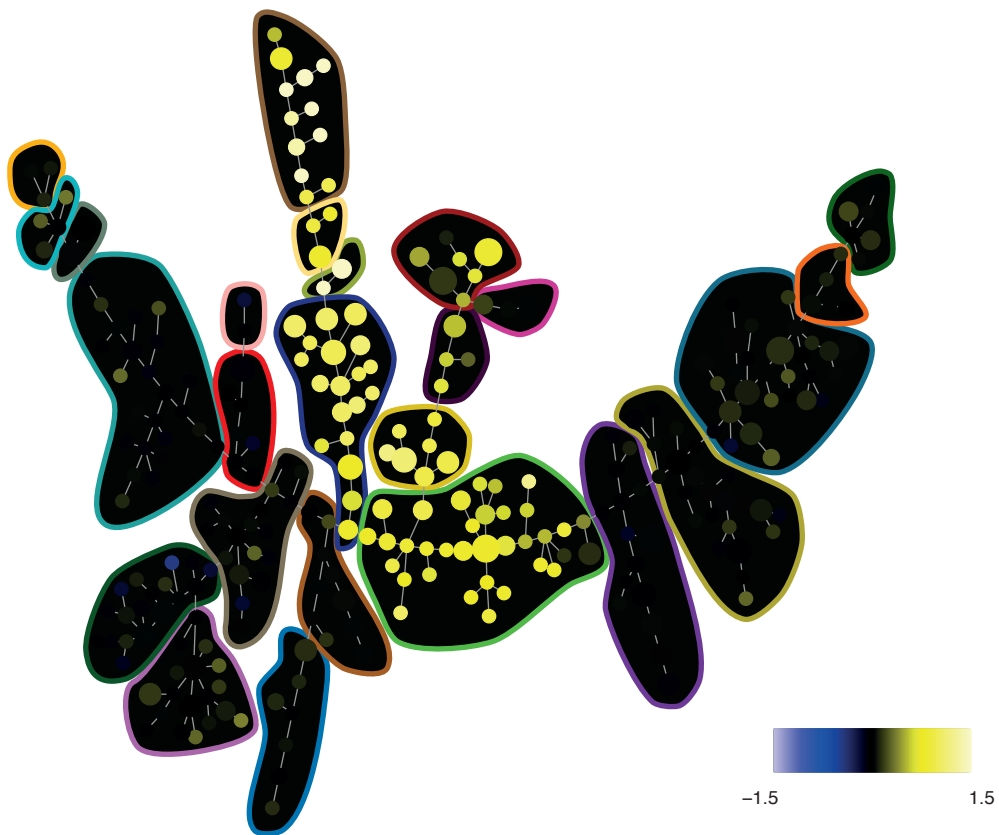

Figure S9A

168-pH3 ---- IFNad vs Ref Ratio

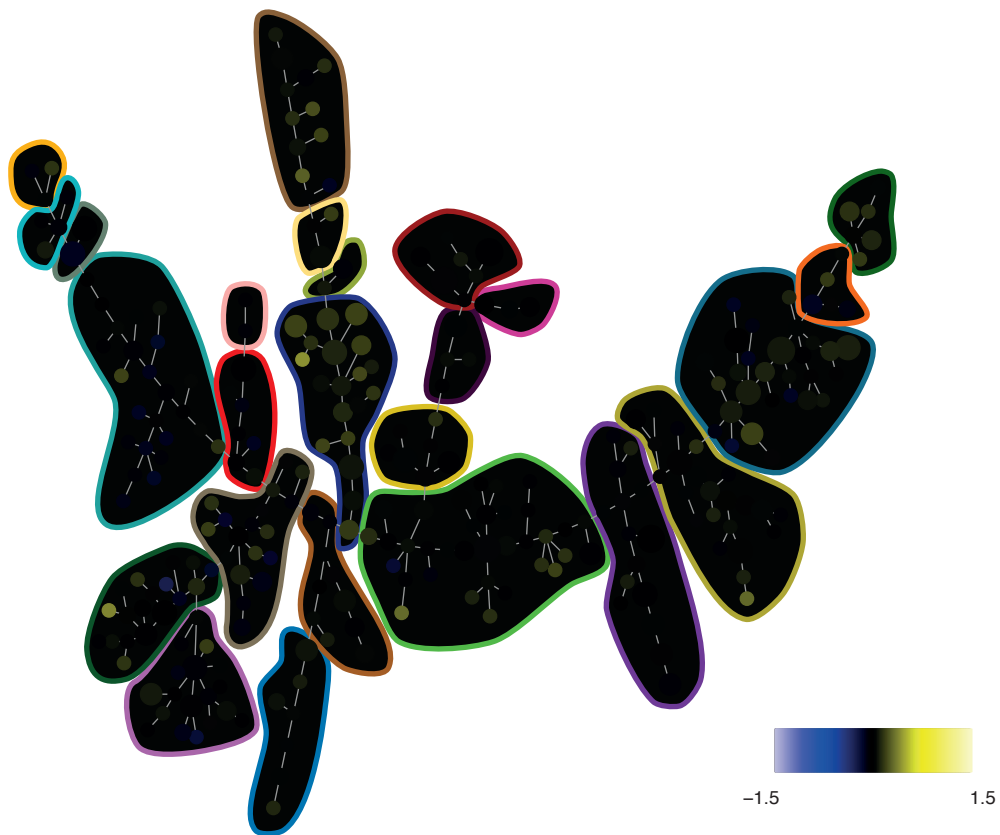

Figure S9A

168-pH3 ---- IL3 vs Ref Ratio

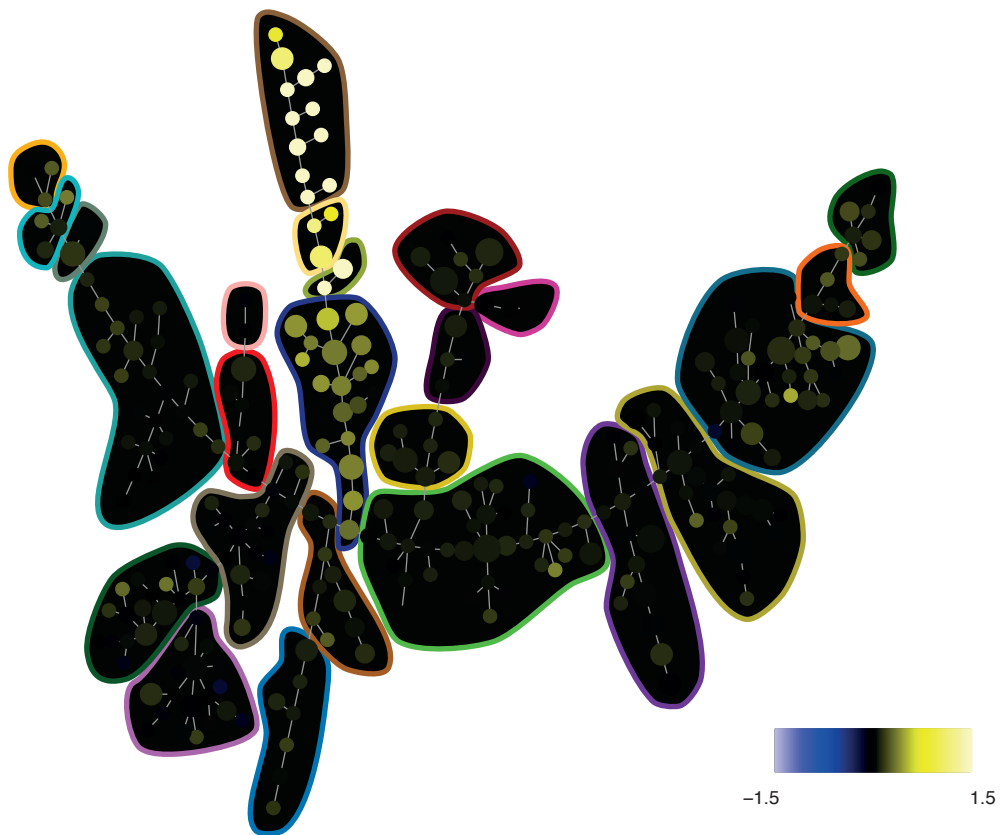

Figure S9A

168-pH3 ---- IL7 vs Ref Ratio

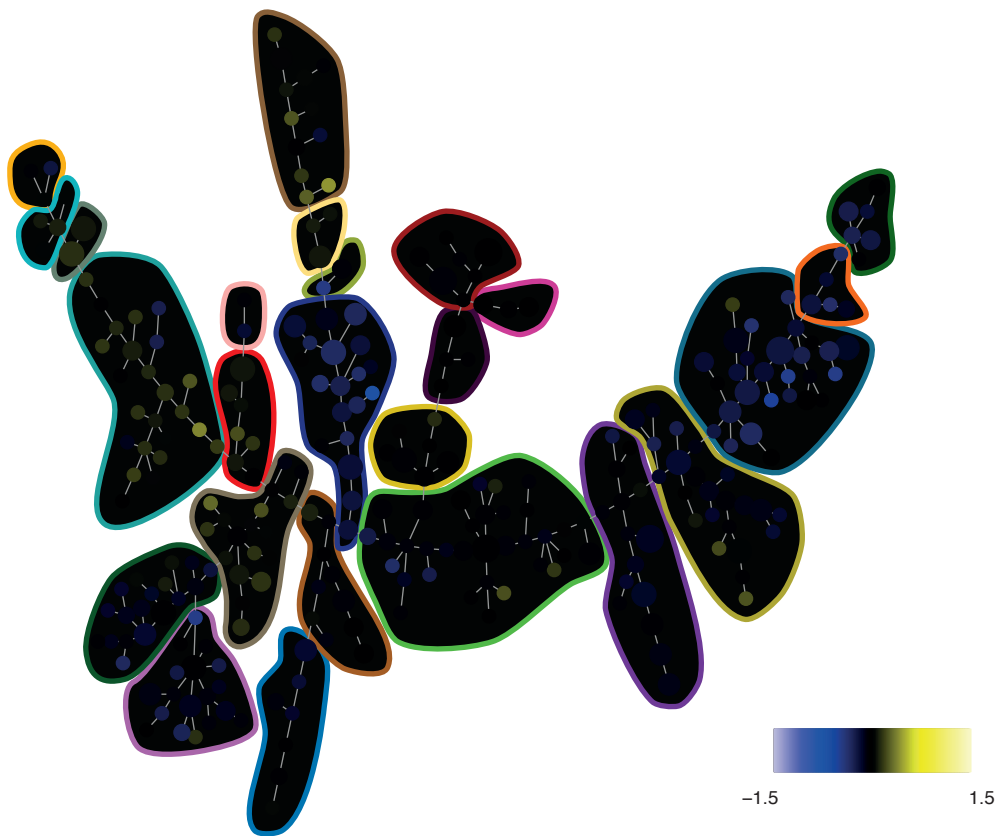

Figure S9A

168-pH3 --- LPS vs Ref Ratio

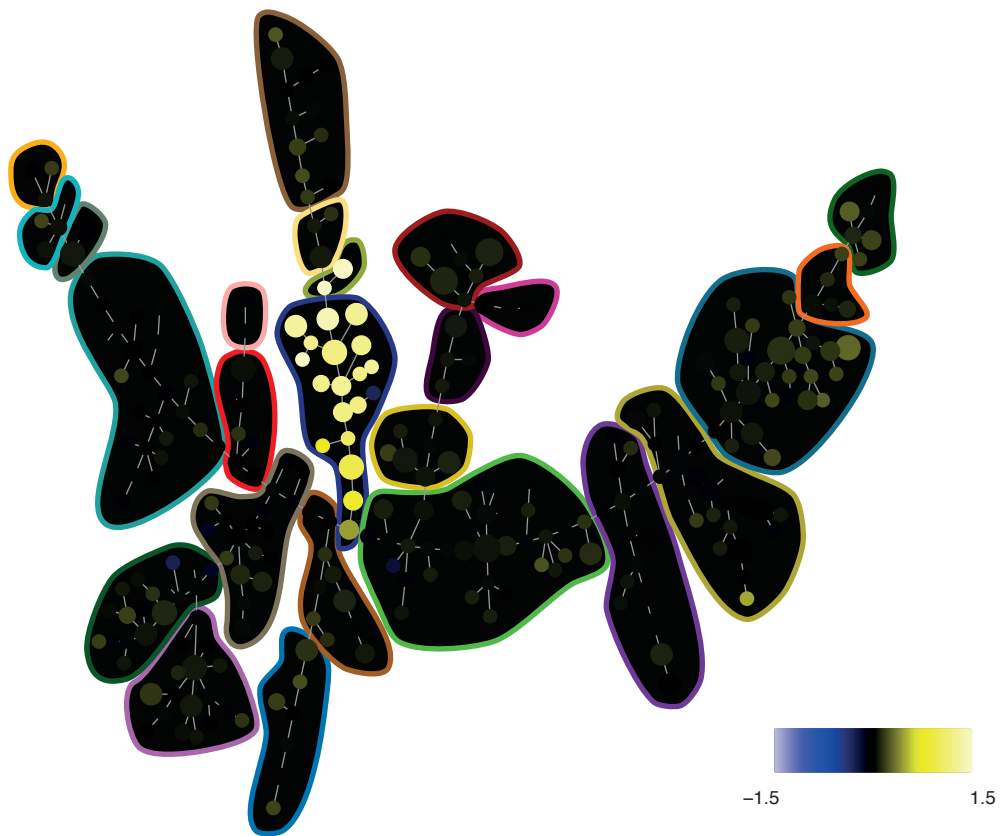

Figure S9A

168-pH3 ---- PMAiono vs Ref Ratio

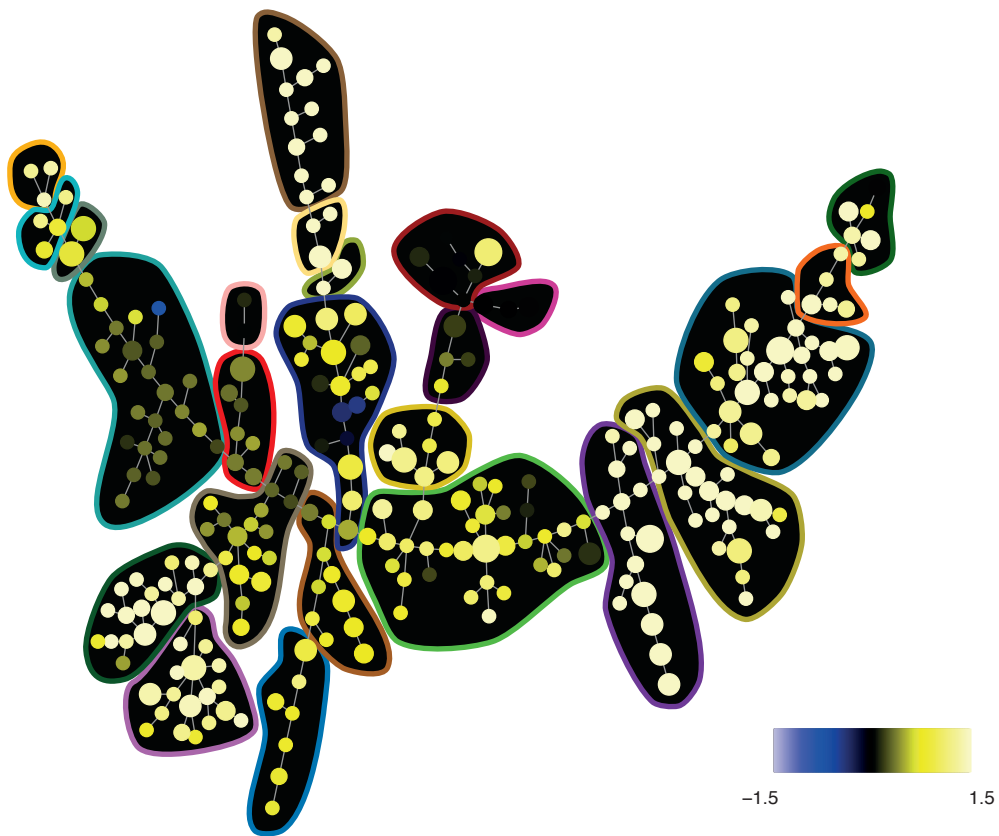



Figure S9A

168-pH3 ---- PVO4 vs Ref Ratio

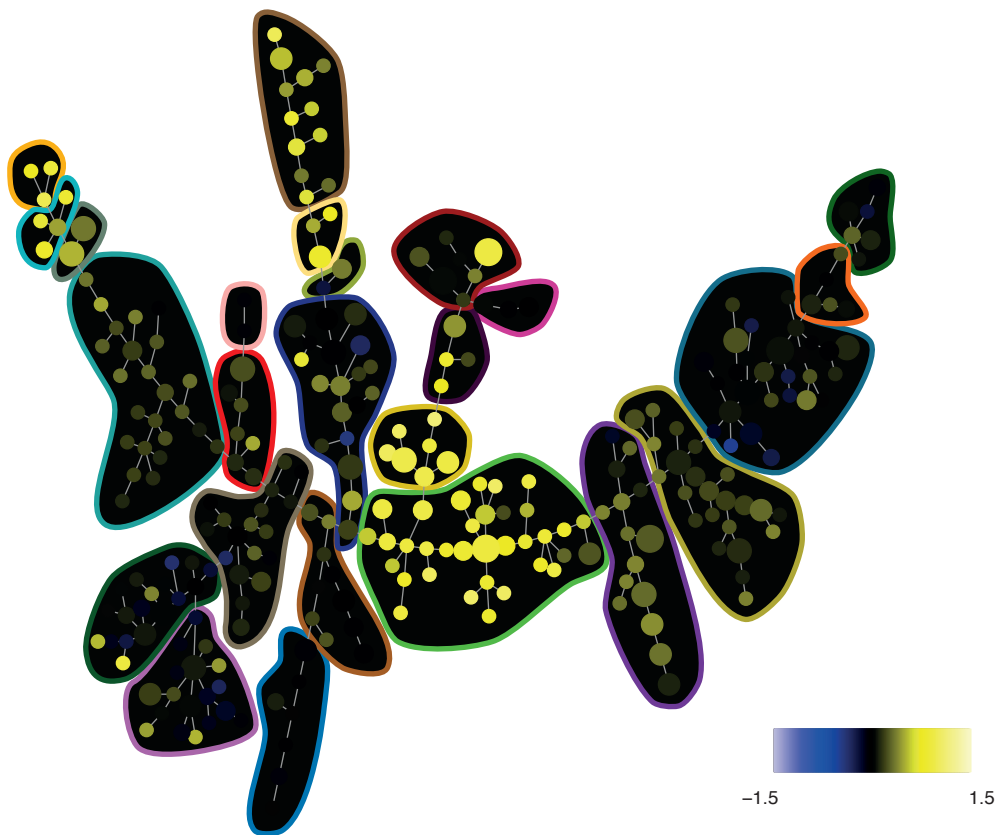

Figure S9A

168-pH3 --- SCF vs Ref Ratio

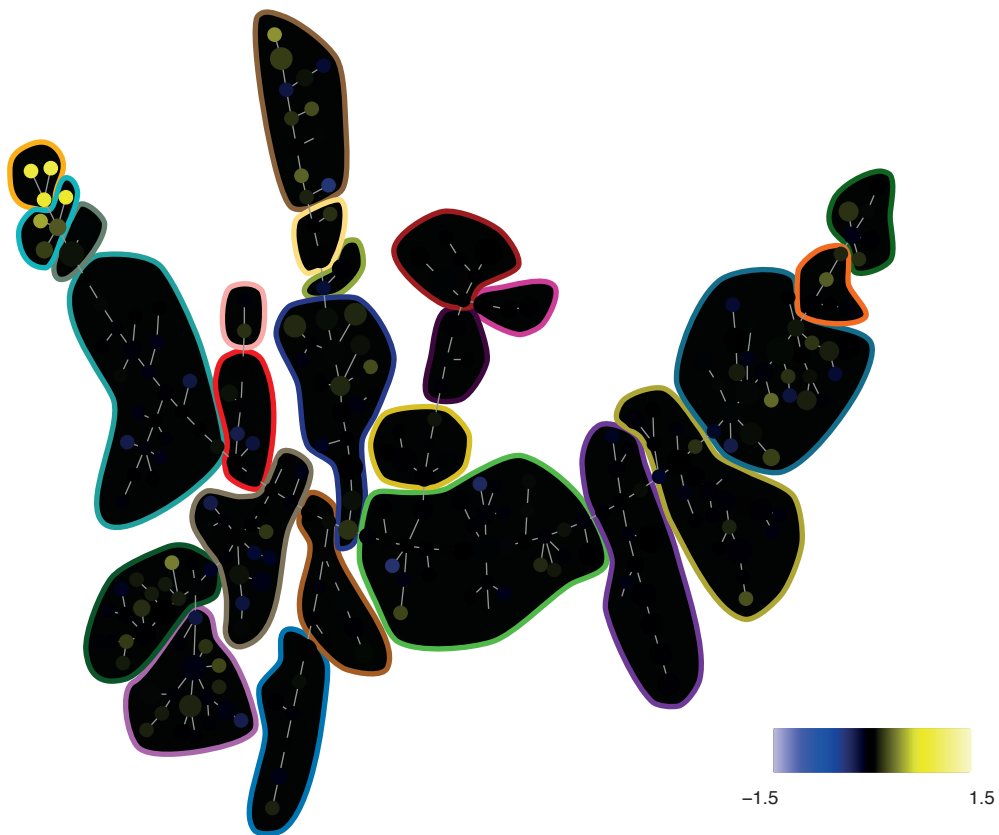

Figure S9A

168-pH3 ---- TNFa vs Ref Ratio

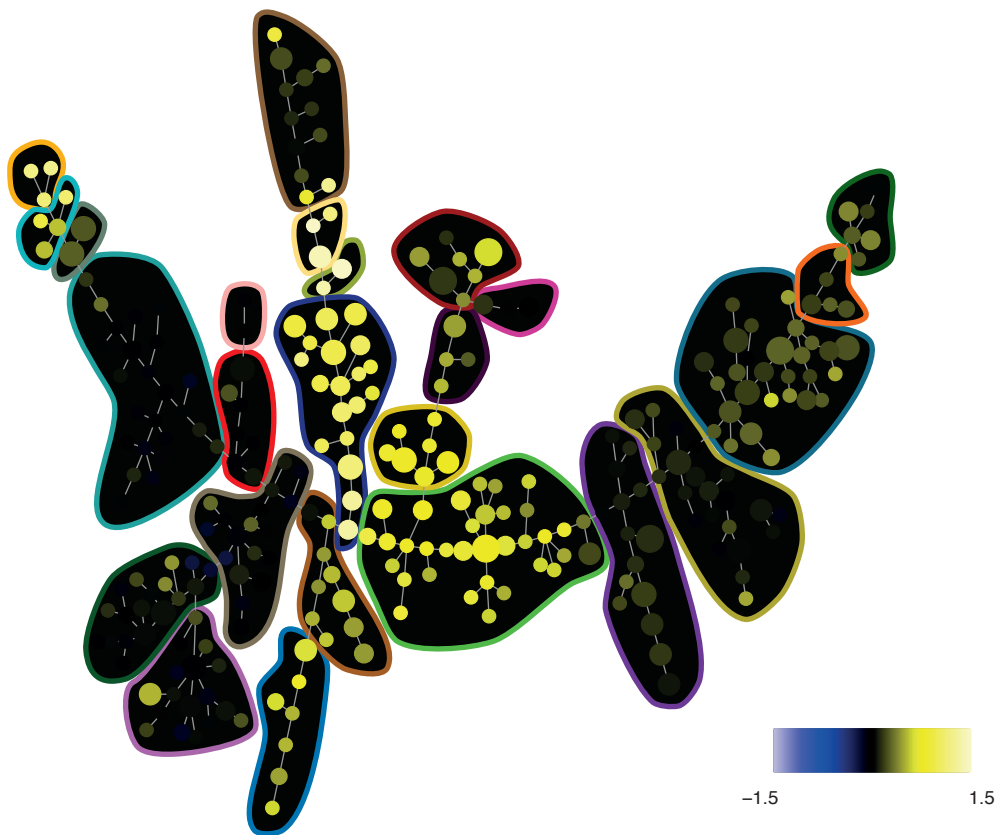

Figure S9A

168-pH3 --- TPO vs Ref Ratio

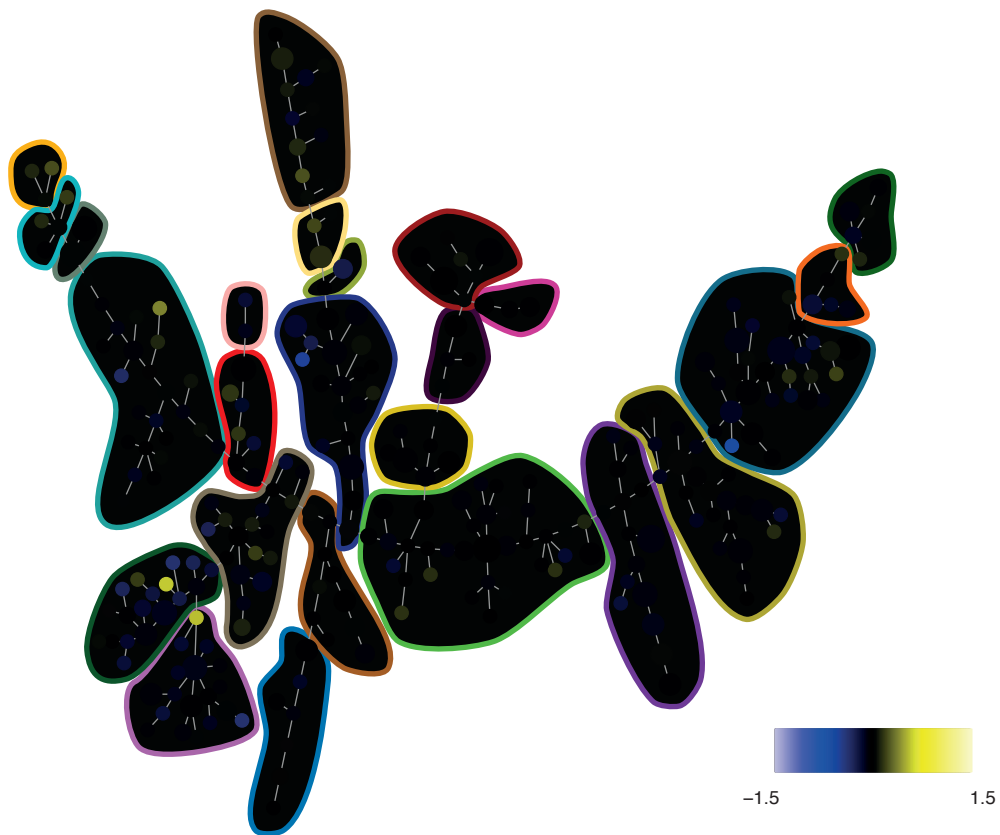

Figure S9A

169-pP38 ---- BCR vs Ref Ratio

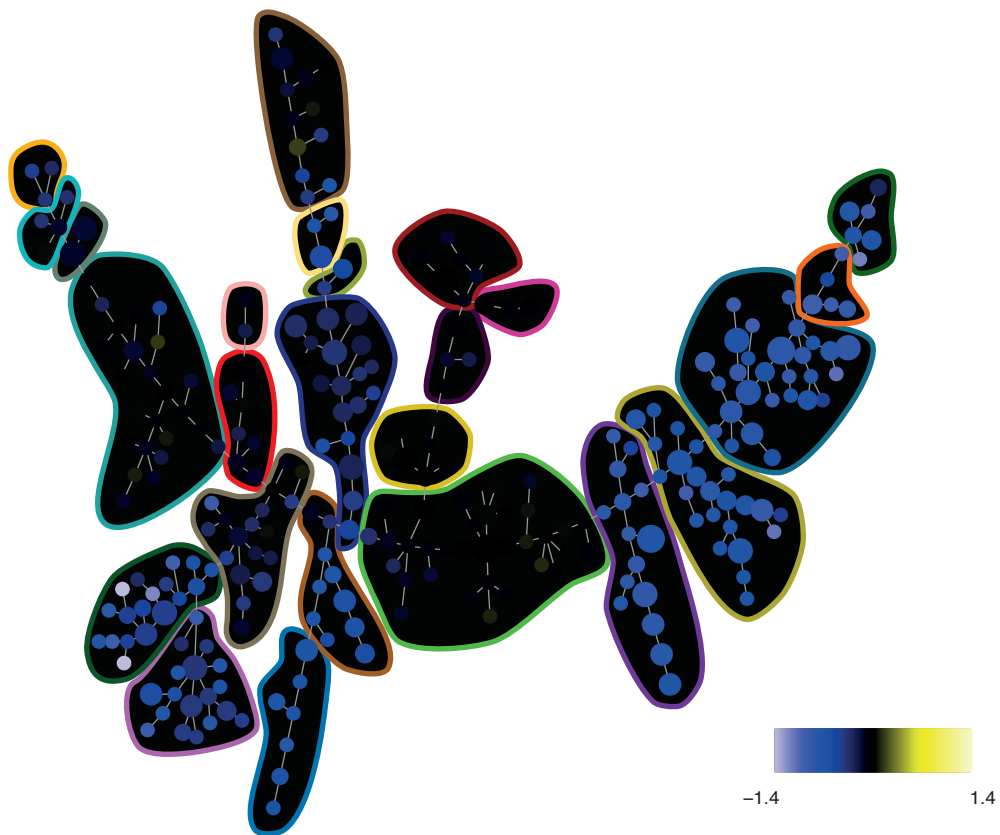

Figure S9A

169-pP38 ---- DMSO vs Ref Ratio

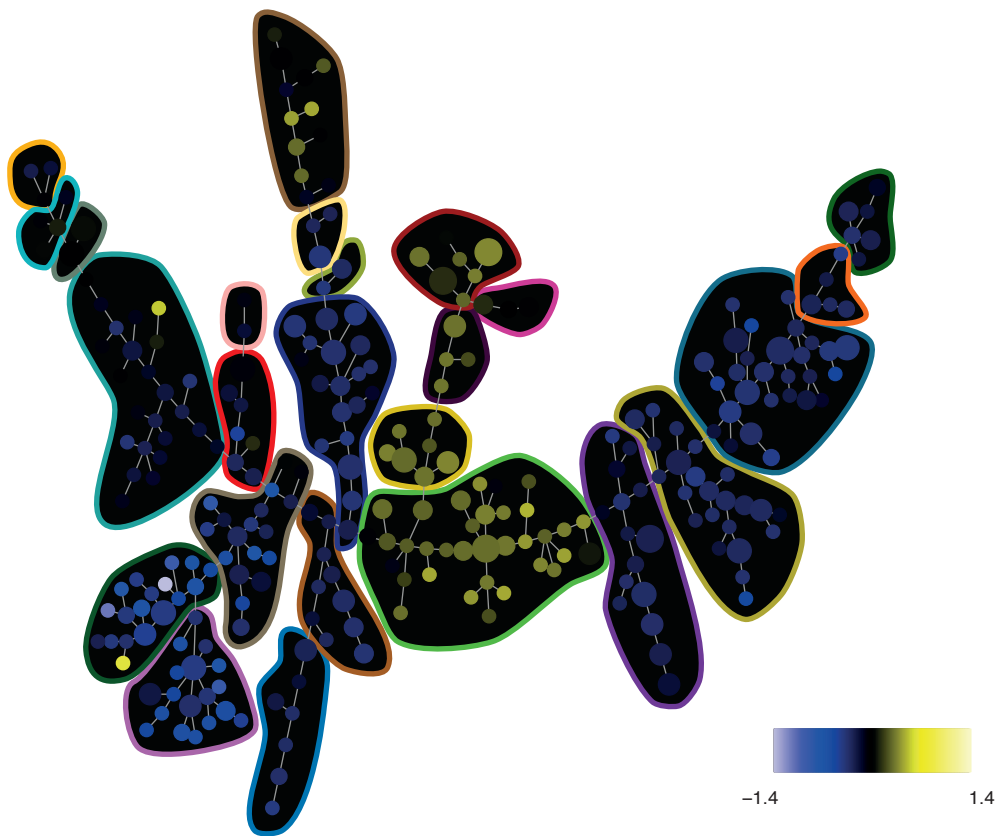

Figure S9A

169-pP38 ---- Flt3L vs Ref Ratio

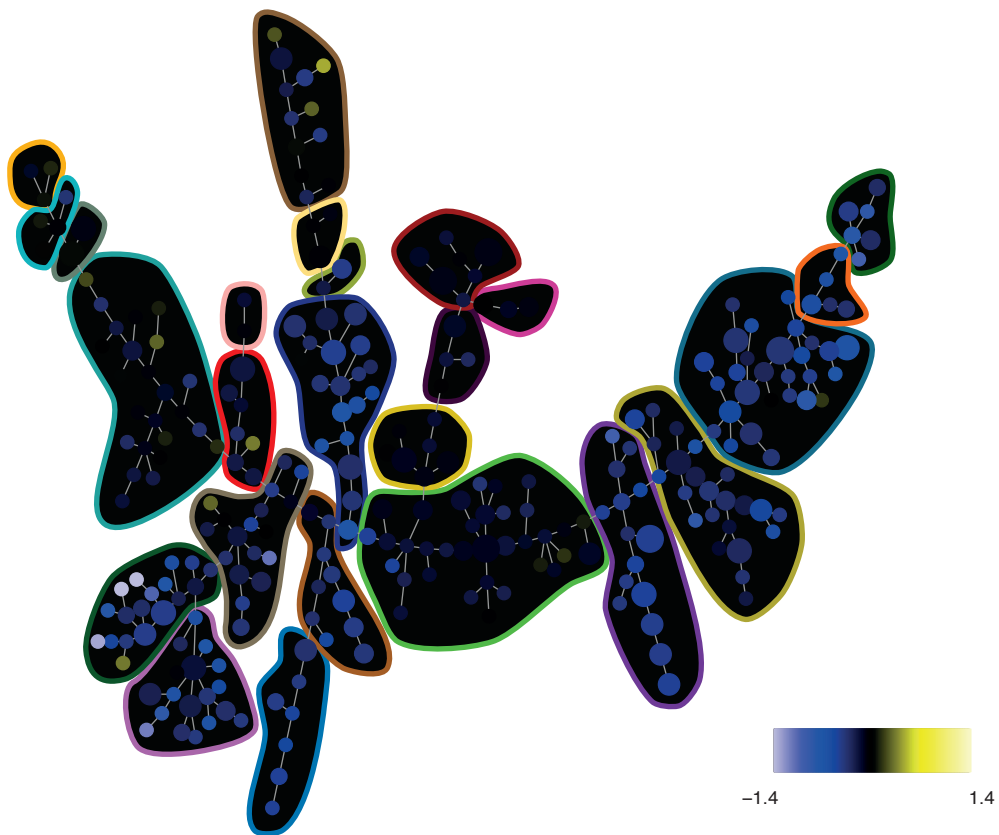

Figure S9A

169-pP38 — GCSF vs Ref Ratio

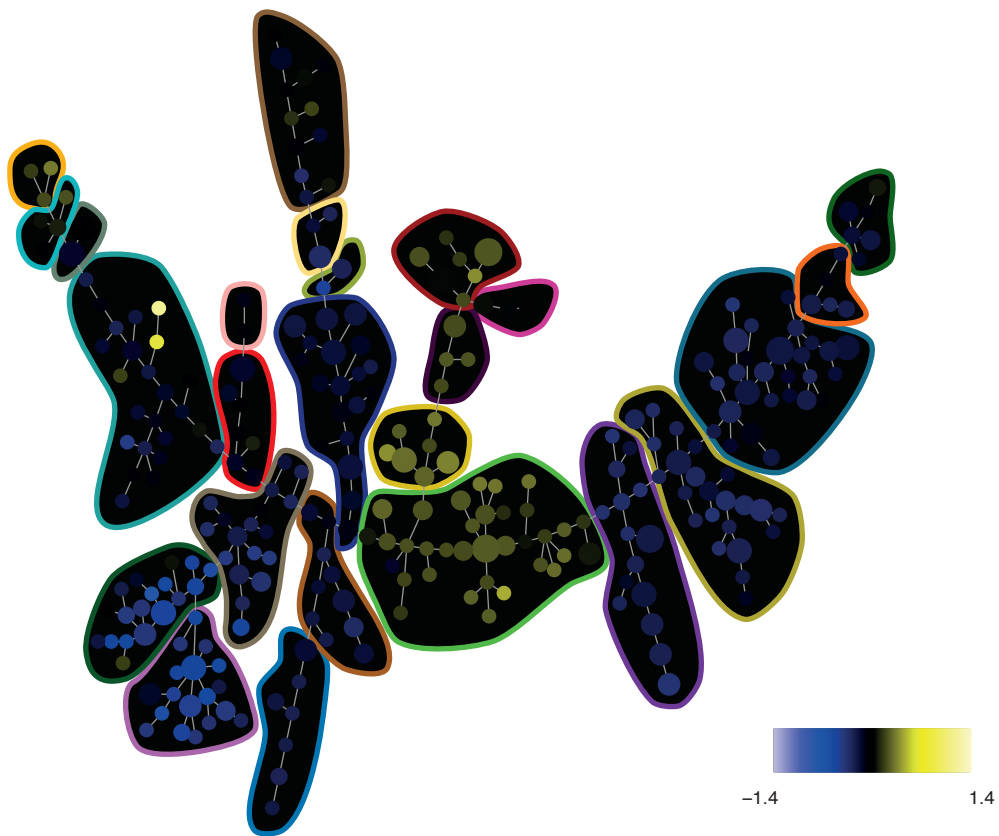



Figure S9A

169-pP38 --- GMCSF vs Ref Ratio

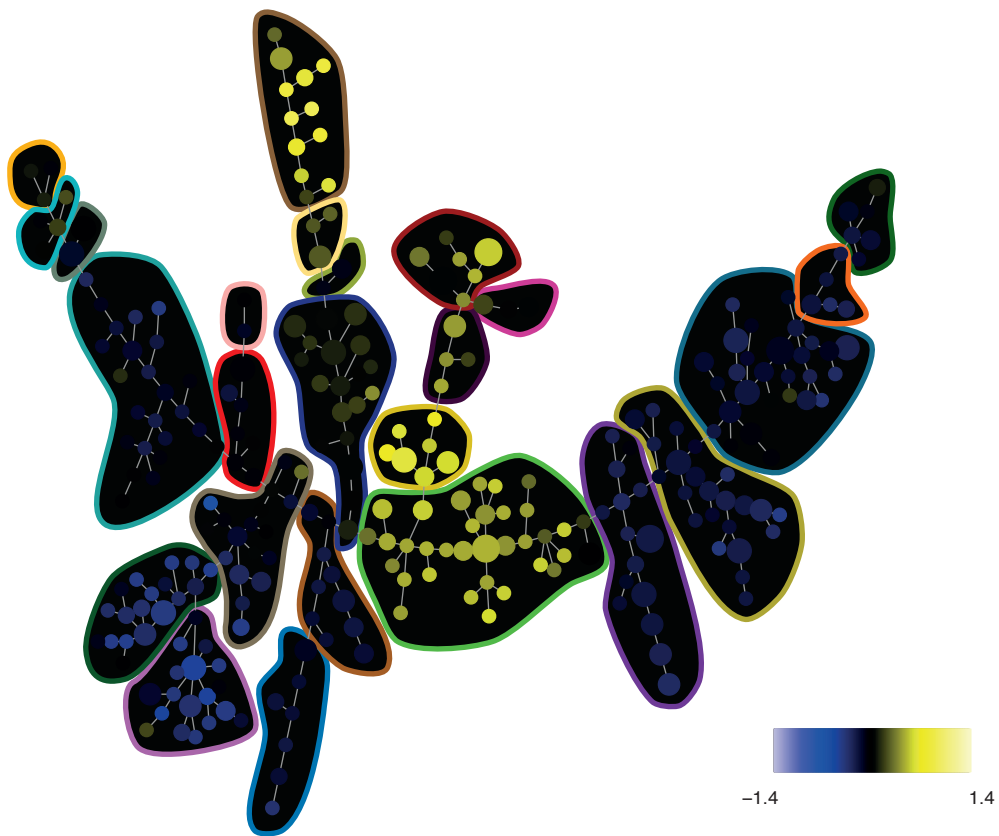

Figure S9A

169-pP38 ---- IFNad vs Ref Ratio

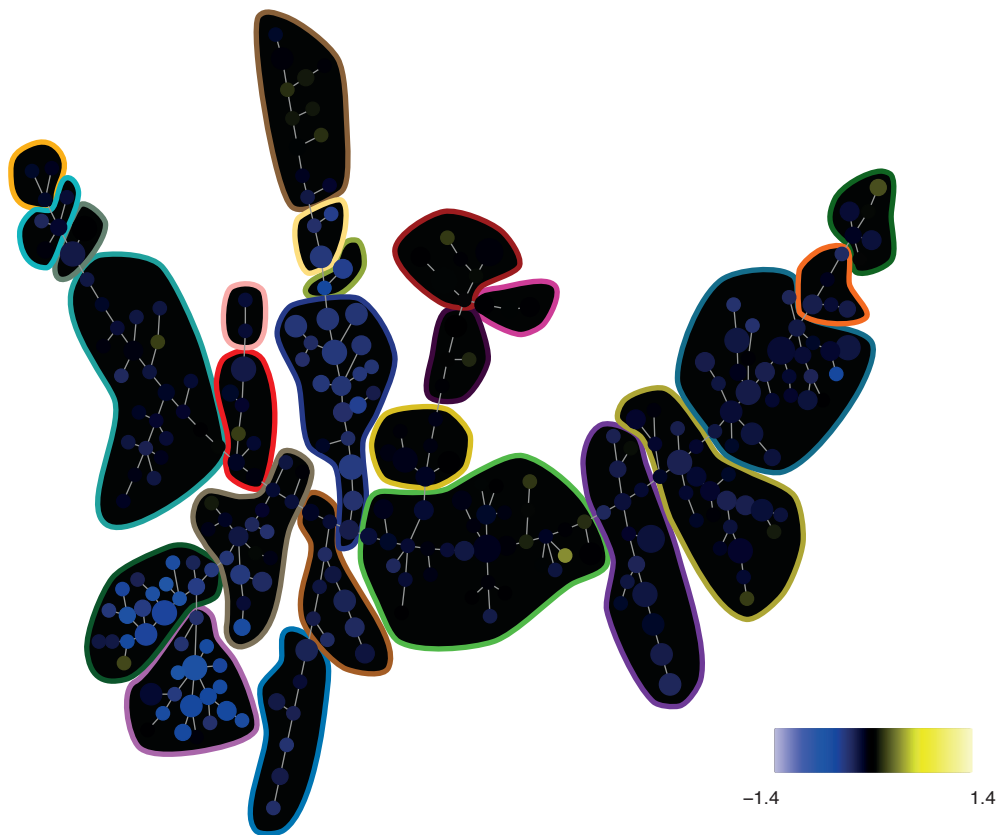

Figure S9A

169-pP38 ---- IL3 vs Ref Ratio

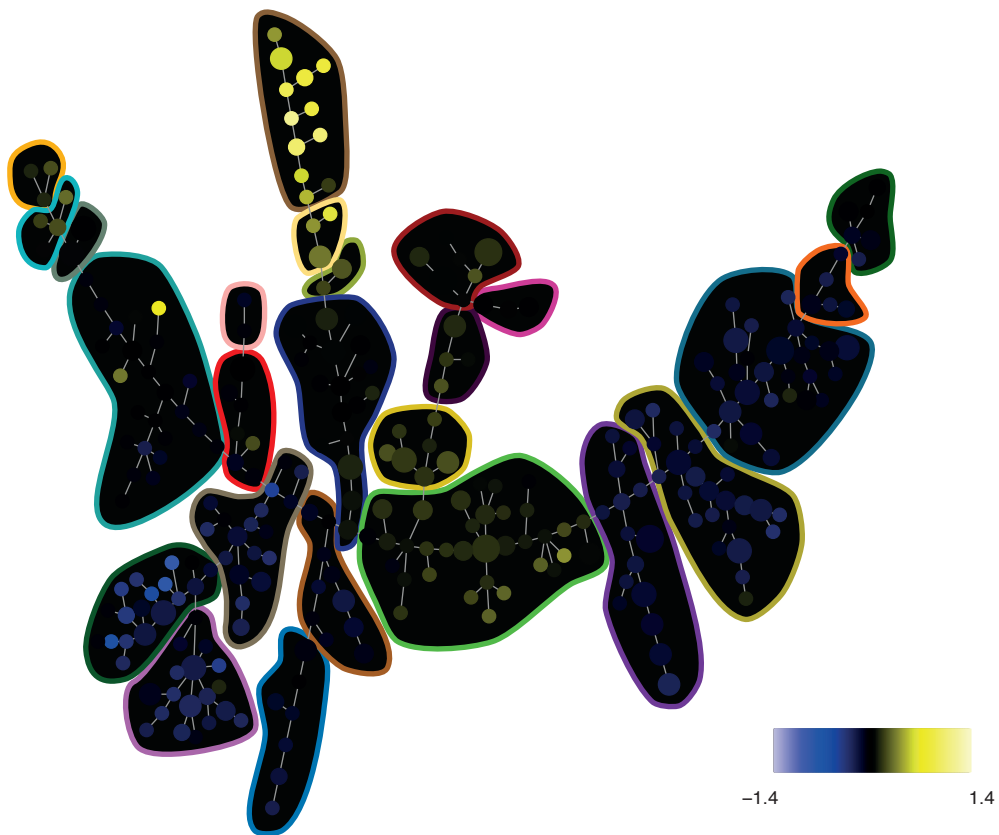

Figure S9A

169-pP38 ---- IL7 vs Ref Ratio

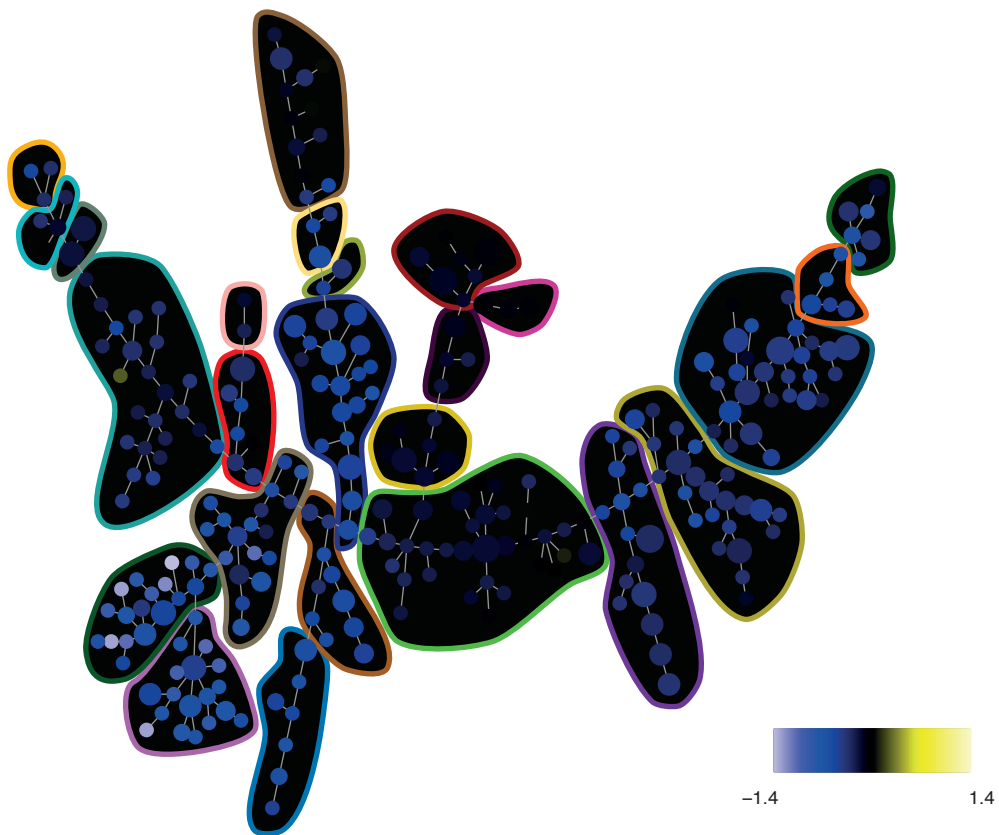

Figure S9A

169-pP38 ---- LPS vs Ref Ratio

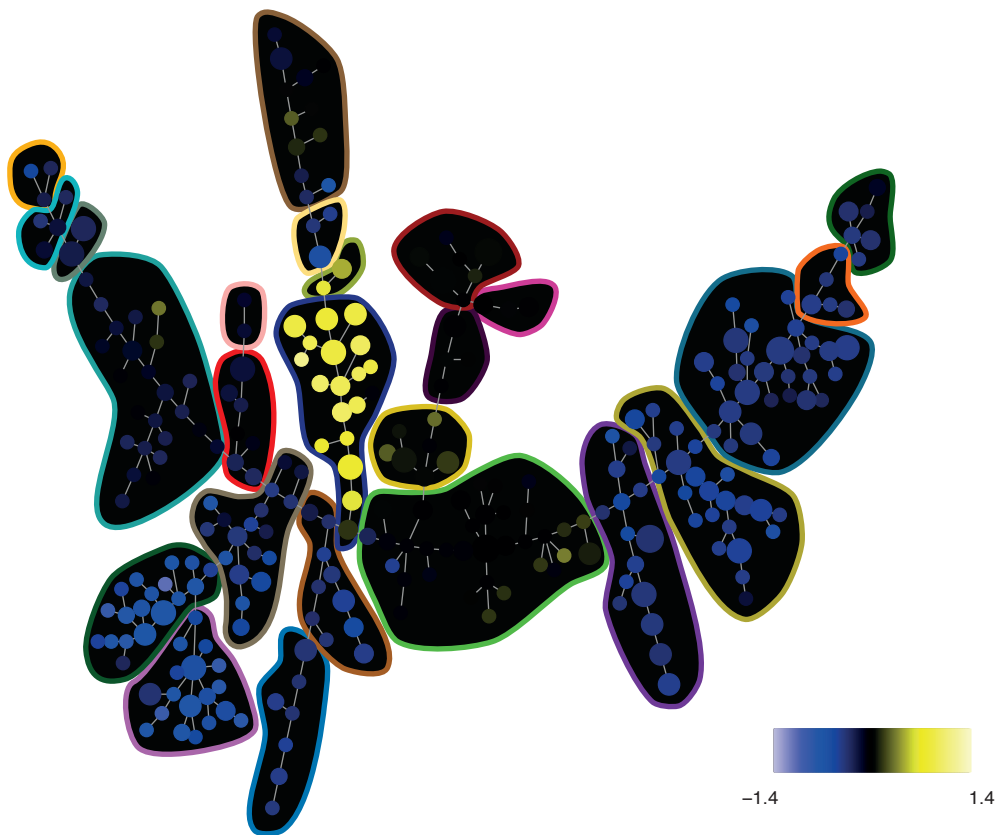

Figure S9A

169-pP38 ---- PMAiono vs Ref Ratio

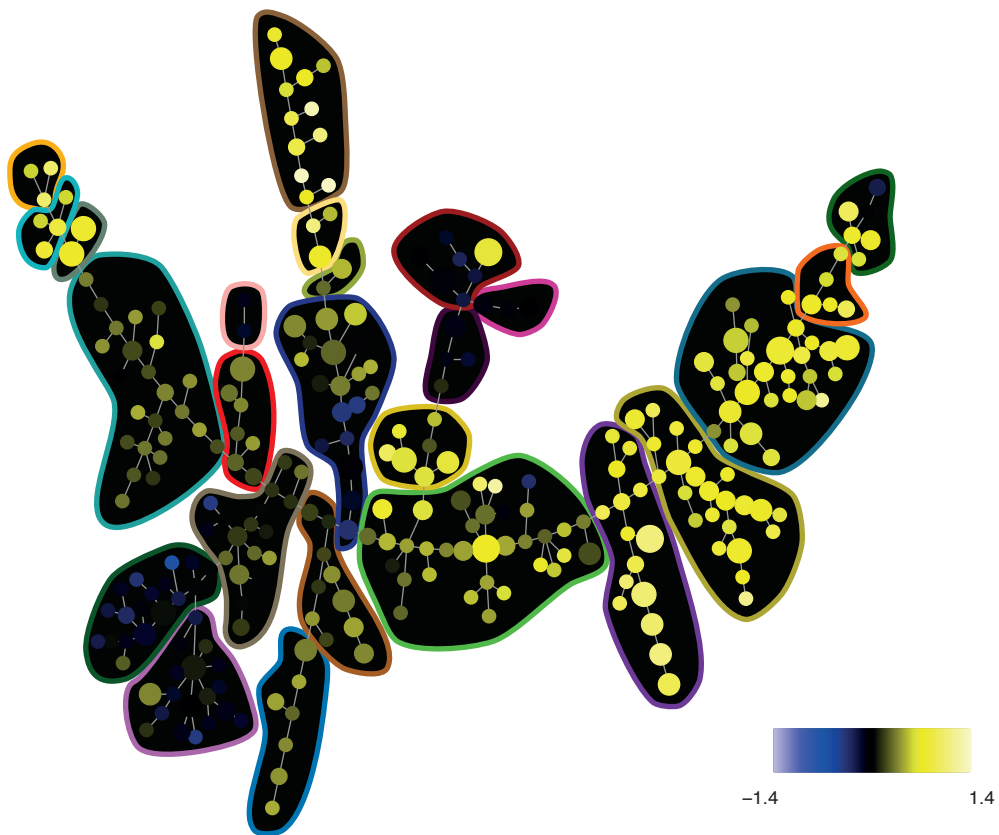

Figure S9A

169-pP38 ---- PVO4 vs Ref Ratio

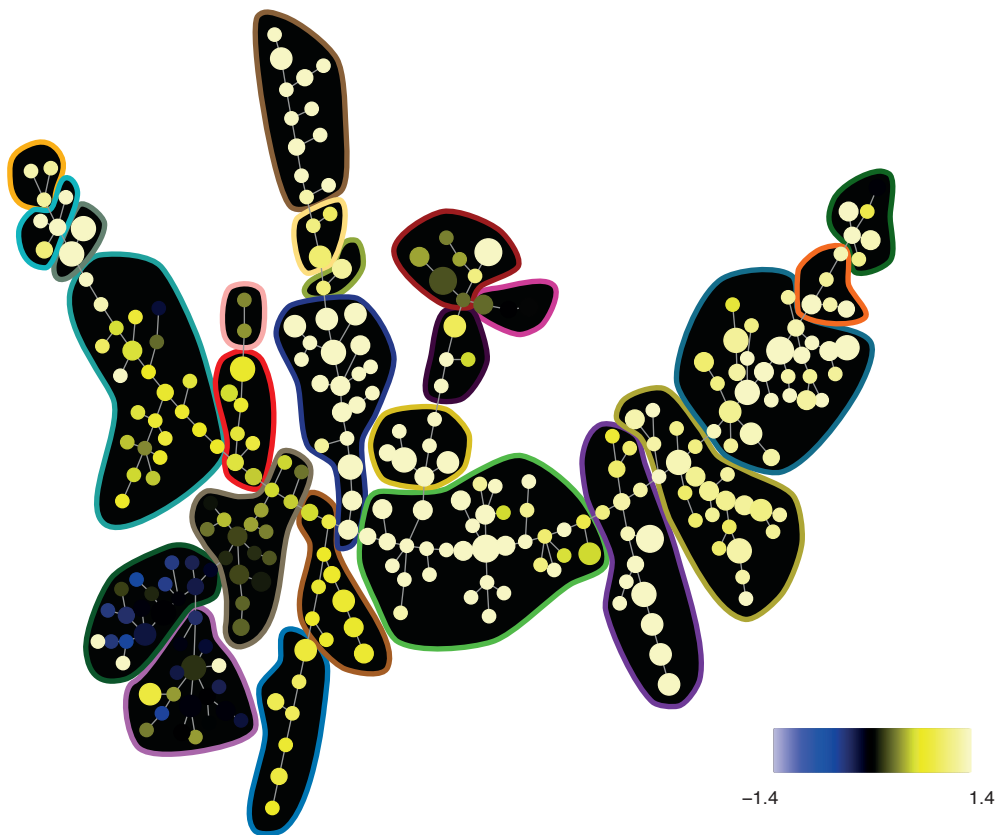

Figure S9A

169-pP38 ---- SCF vs Ref Ratio

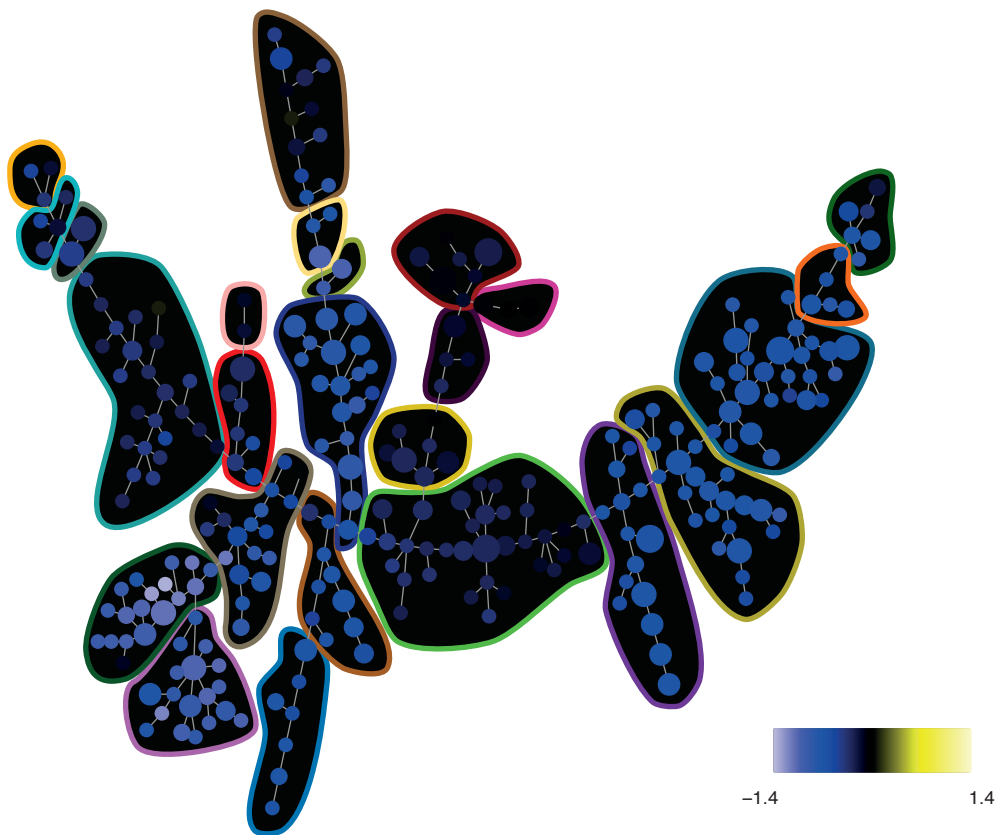



Figure S9A

169-pP38 --- TNFa vs Ref Ratio

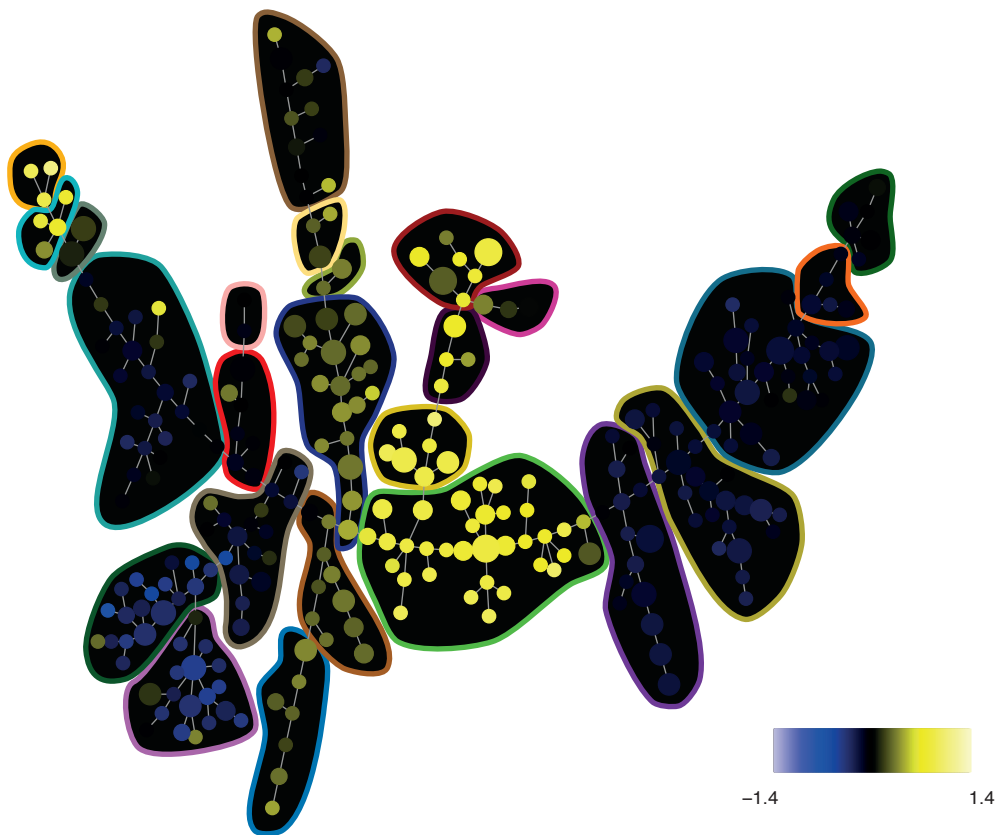

Figure S9A

169-pP38 ---- TPO vs Ref Ratio

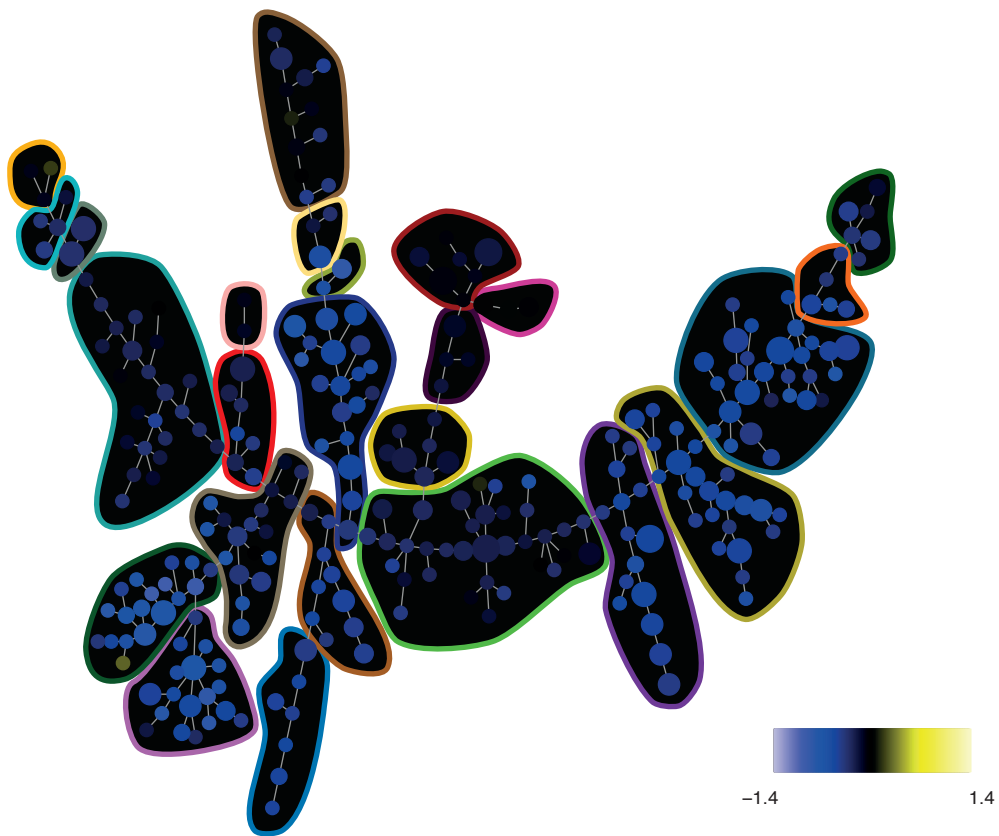

Figure S9A

171-pBtk/Itk --- BCR vs Ref Ratio

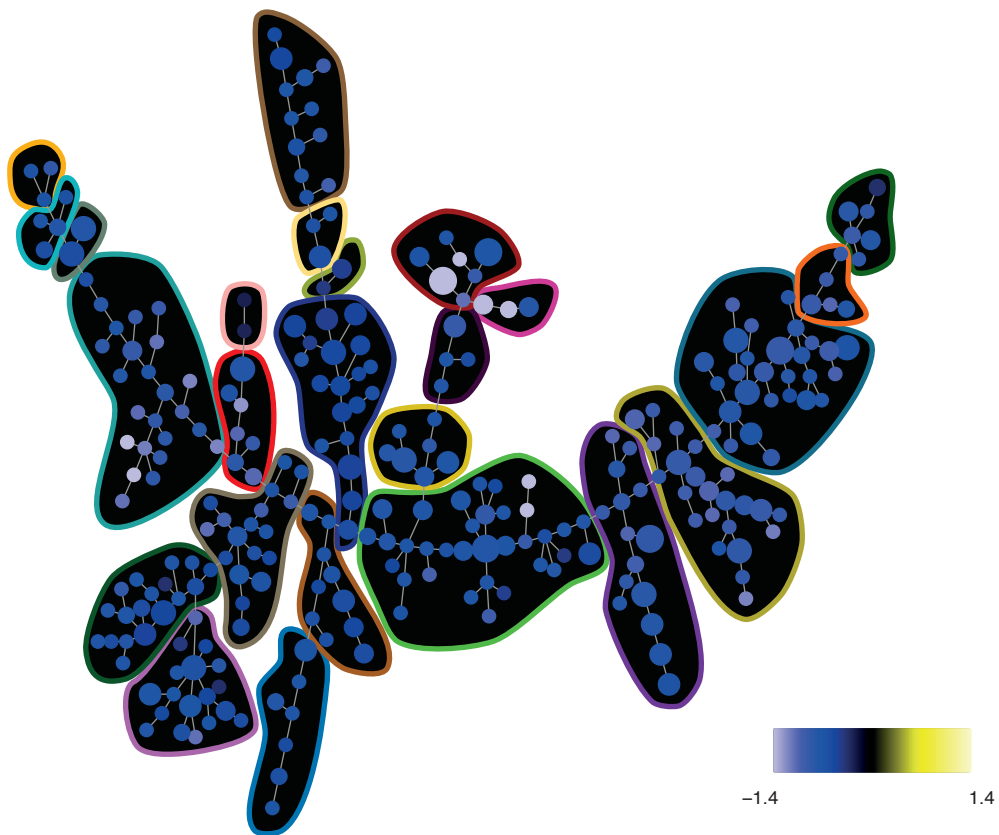

Figure S9A

171-pBtk/Itk --- DMSO vs Ref Ratio

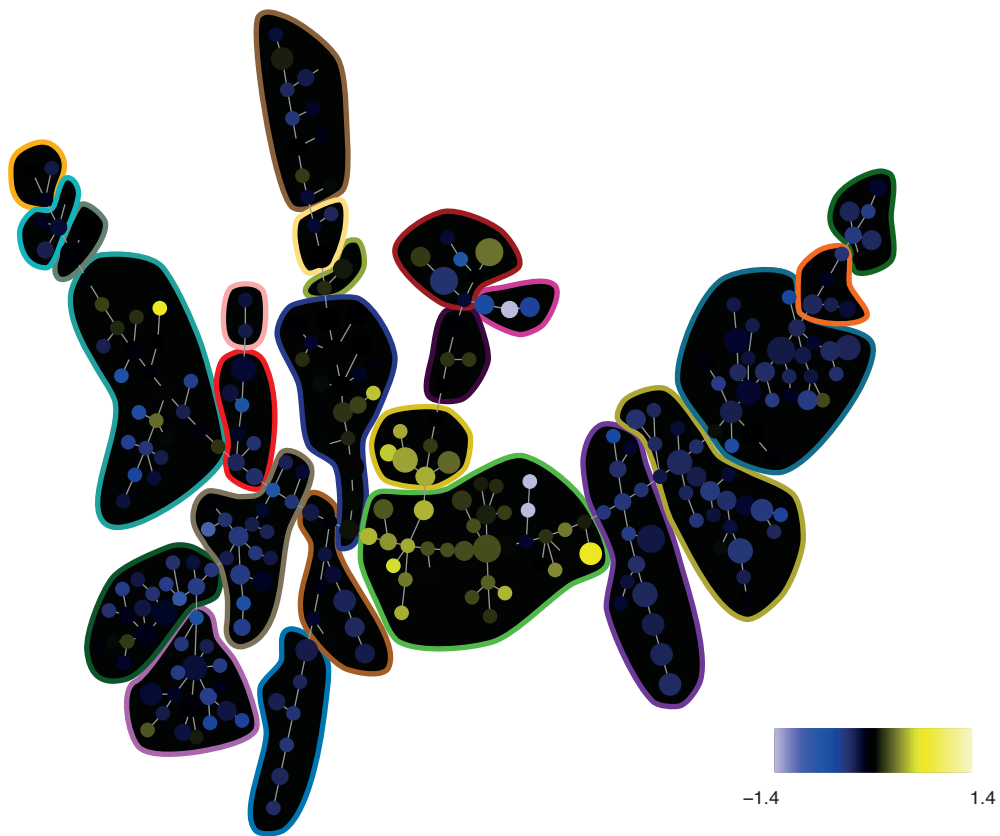

Figure S9A

171-pBtk/Itk --- Flt3L vs Ref Ratio

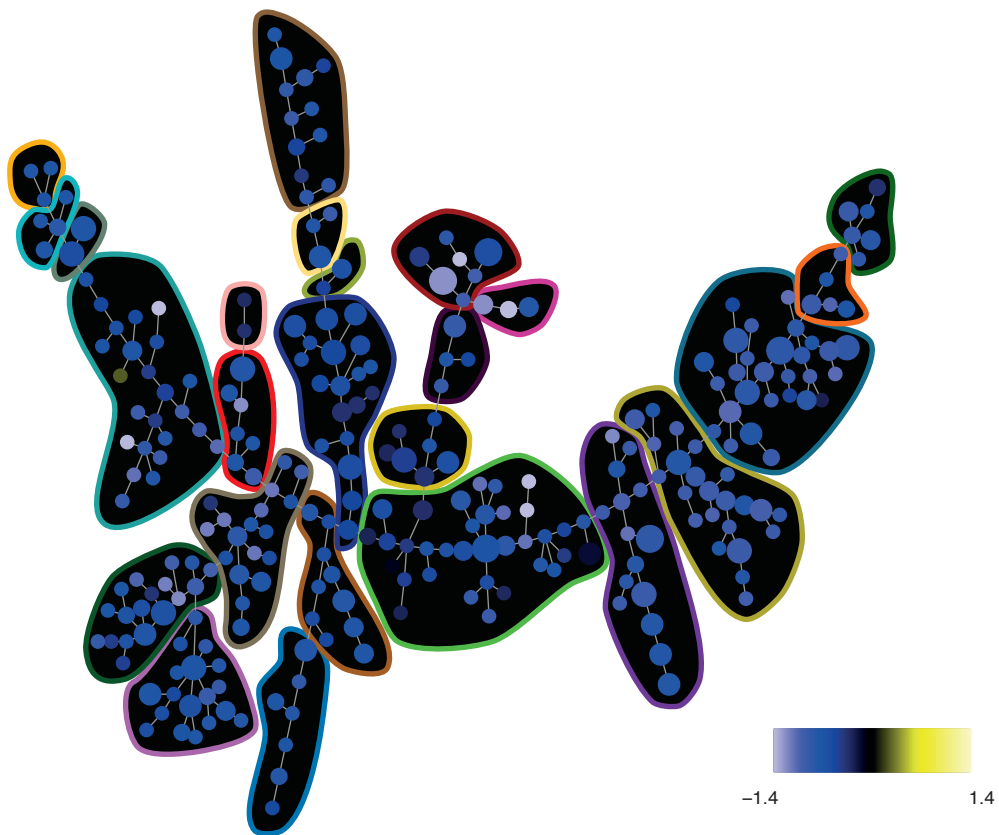

Figure S9A

171-pBtk/Itk ---- GCSF vs Ref Ratio

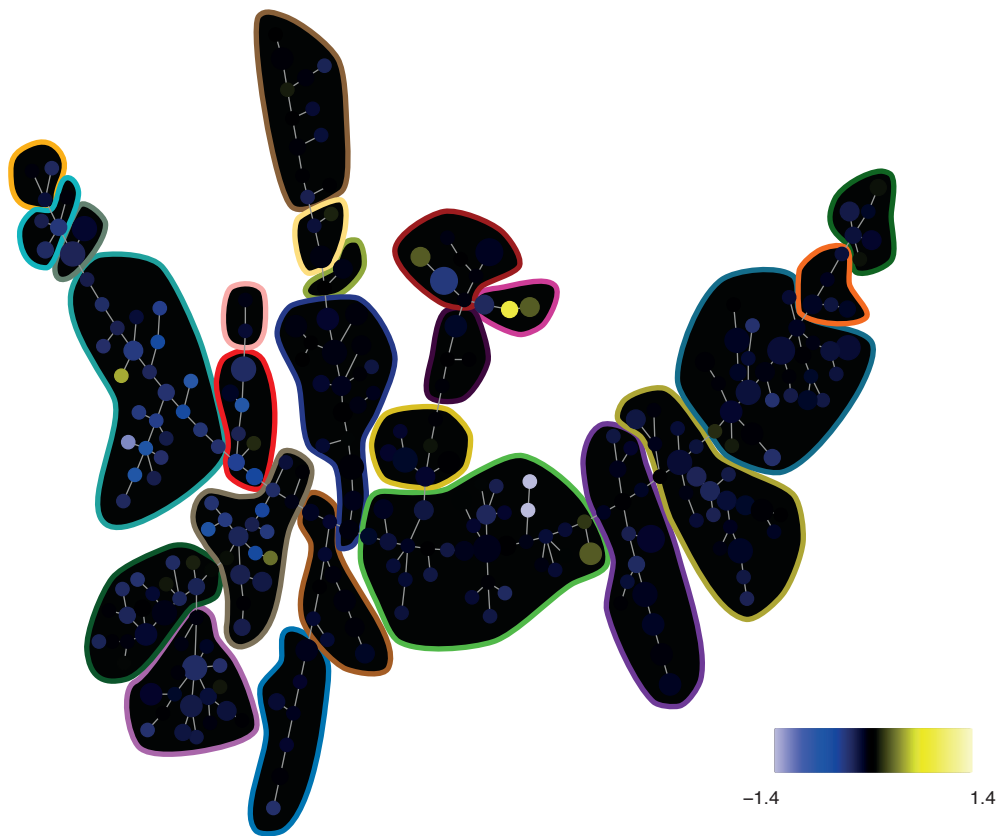

Figure S9A

171-pBtk/Itk ---- GMCSF vs Ref Ratio

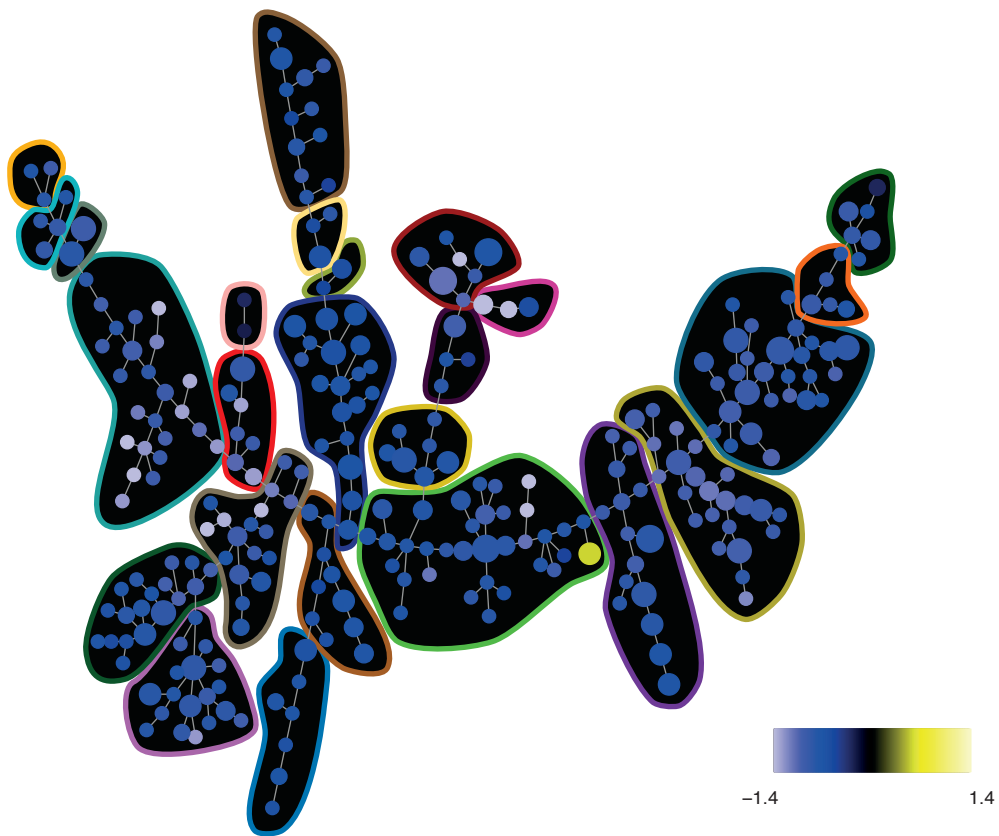

Figure S9A

171-pBtk/Itk ---- IFNad vs Ref Ratio

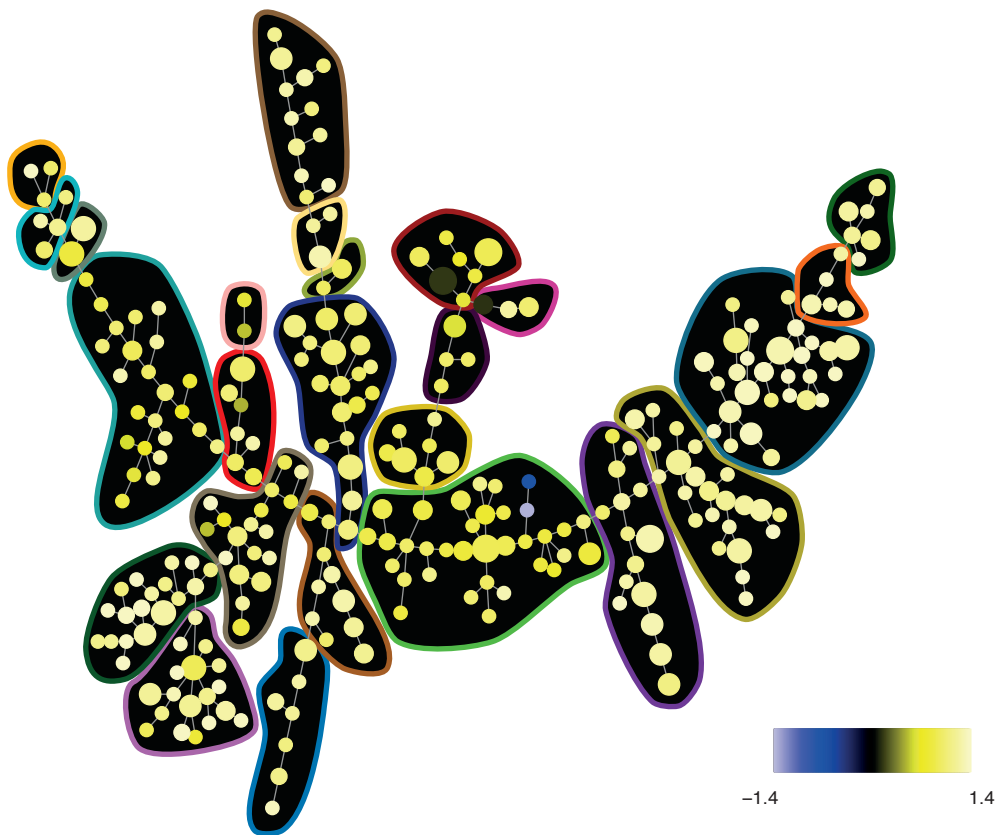



Figure S9A

171-pBtk/Itk — IL3 vs Ref Ratio

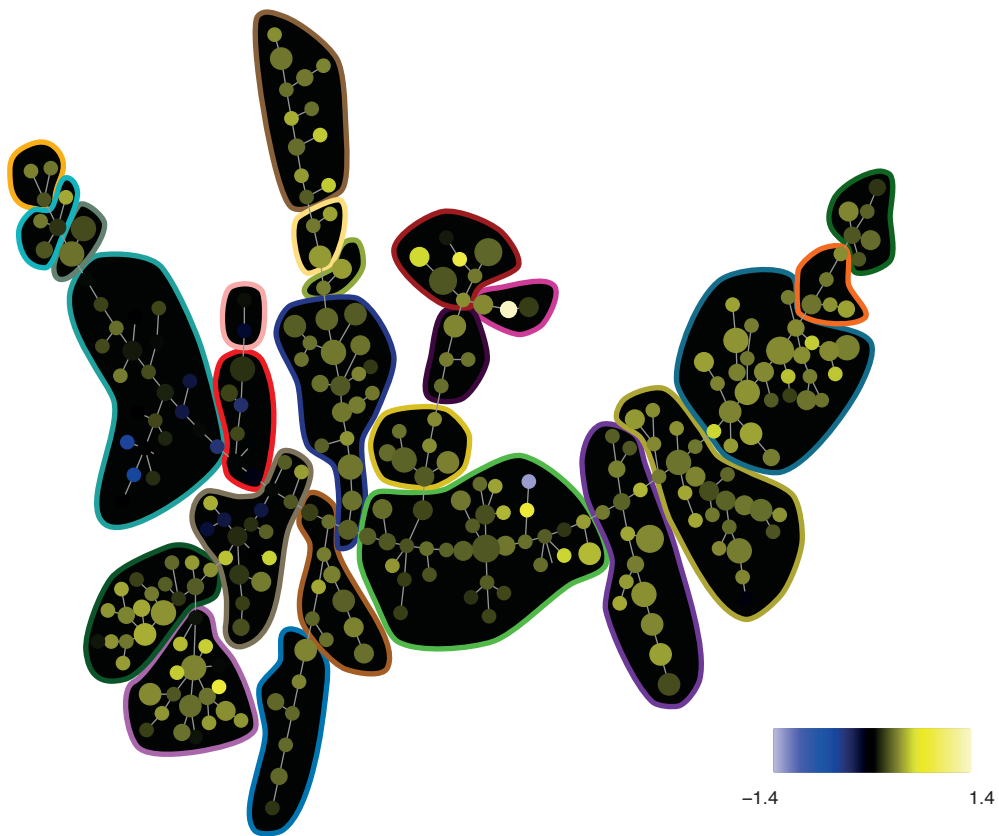

Figure S9A

171-pBtk/Itk — IL7 vs Ref Ratio

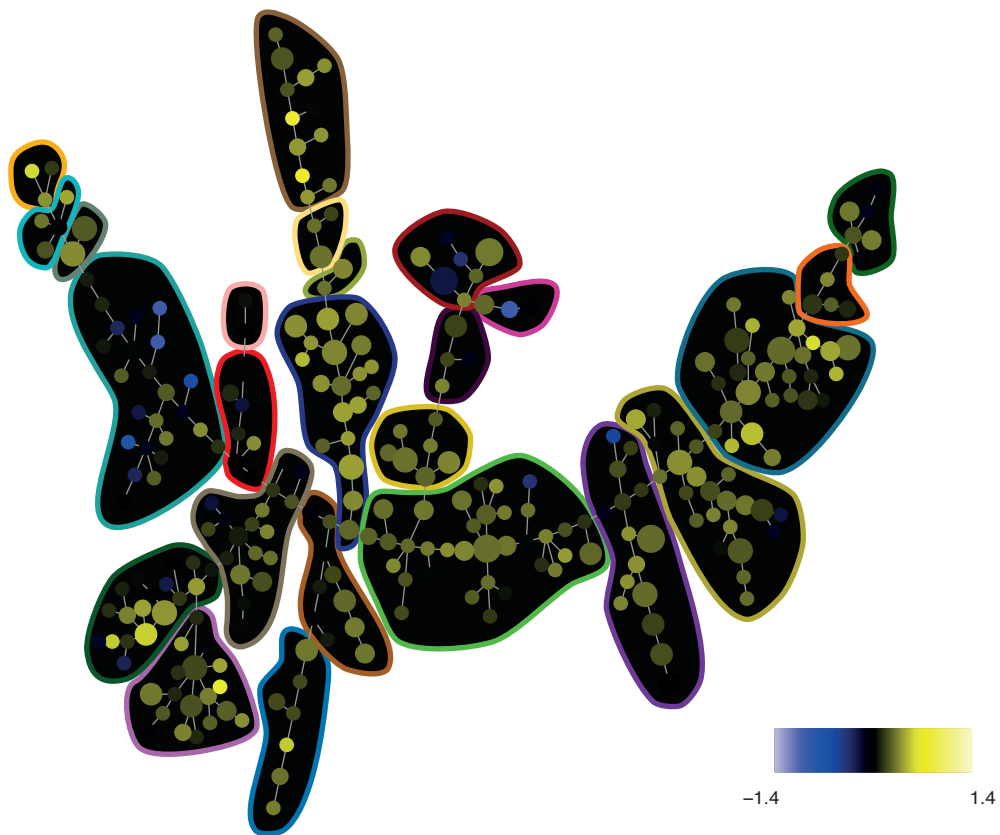

Figure S9A

171-pBtk/Itk --- LPS vs Ref Ratio

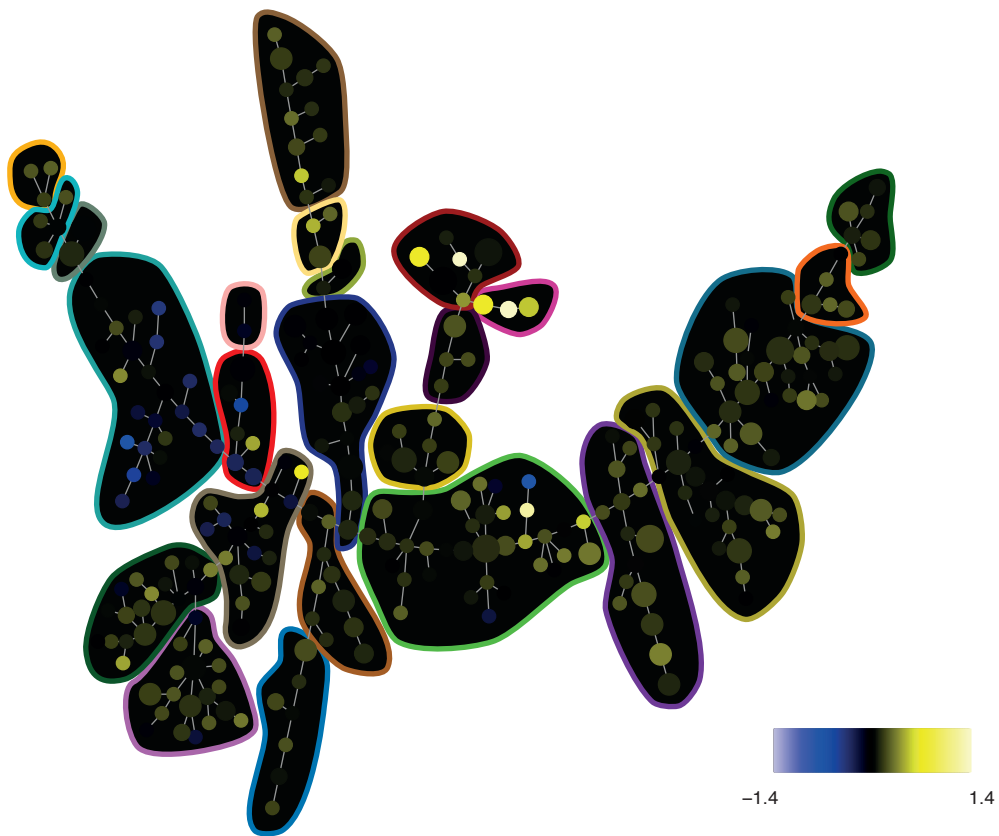

Figure S9A

171-pBtk/Itk ---- PMAiono vs Ref Ratio

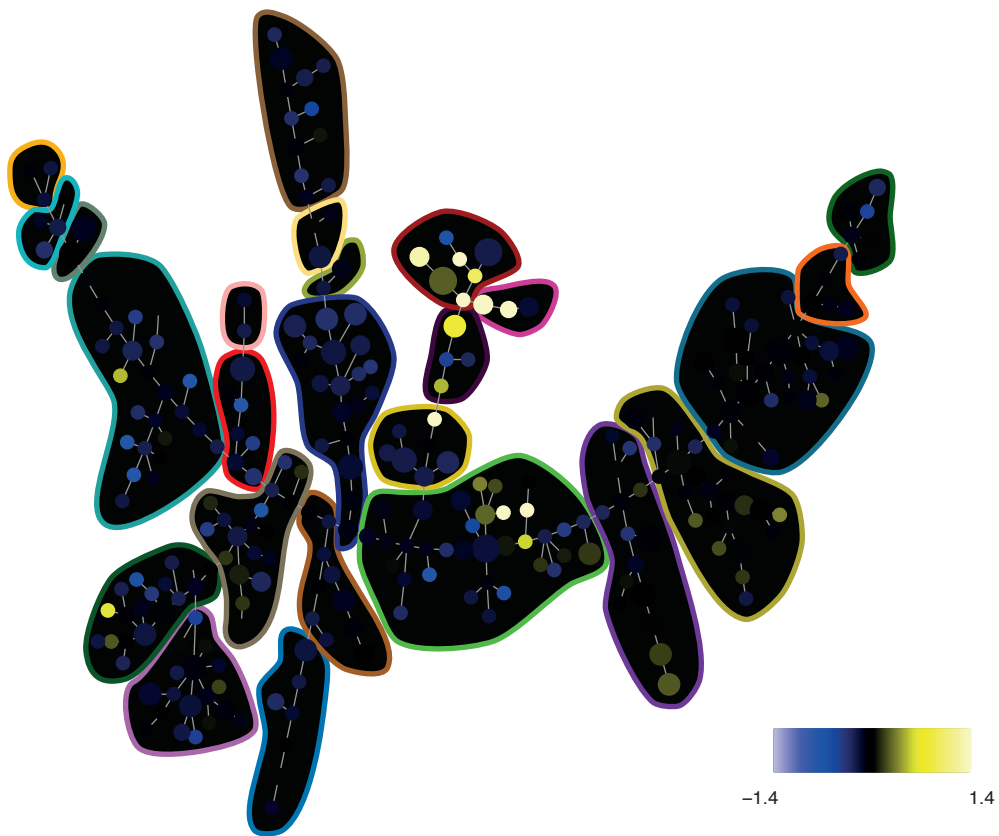

Figure S9A

171-pBtk/Itk — PVO4 vs Ref Ratio

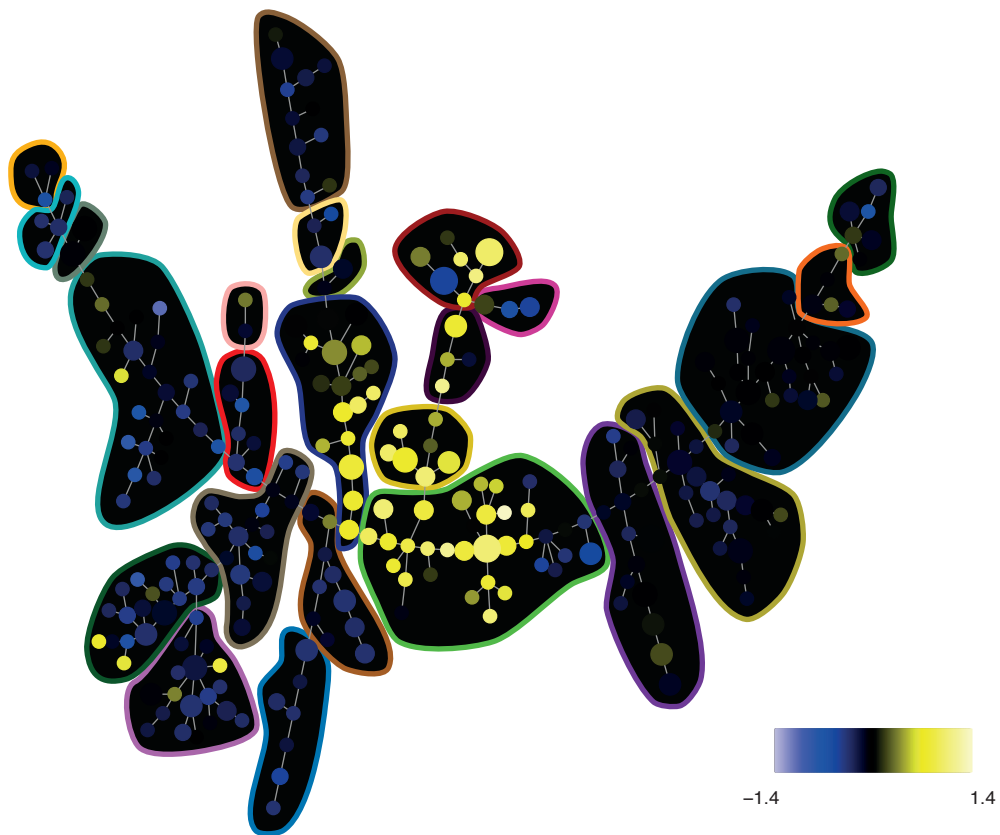

Figure S9A

171-pBtk/Itk ---- SCF vs Ref Ratio

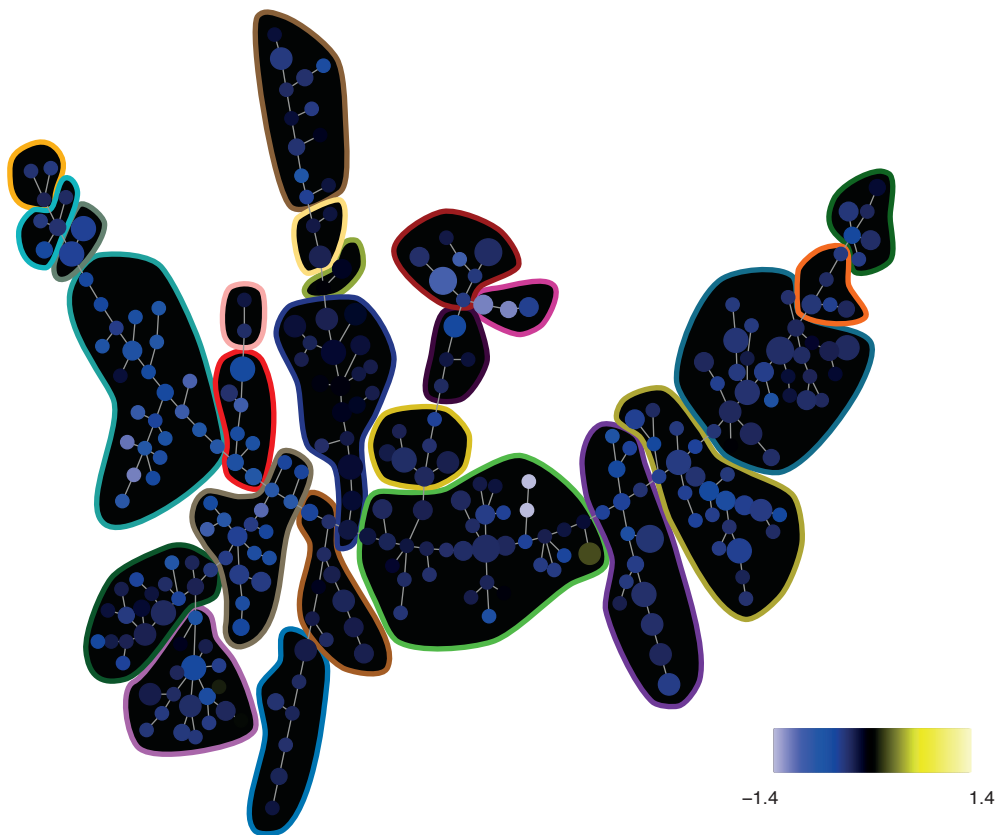

Figure S9A

171-pBtk/Itk --- TNFa vs Ref Ratio

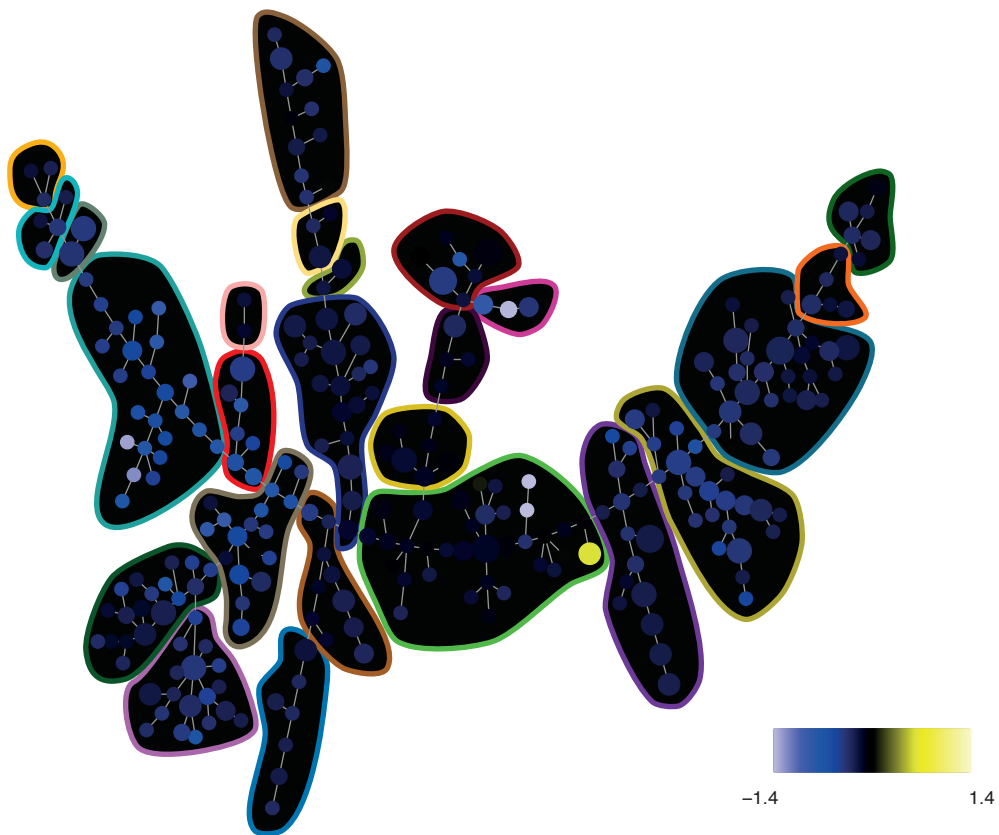

Figure S9A

171-pBtk/Itk ---- TPO vs Ref Ratio

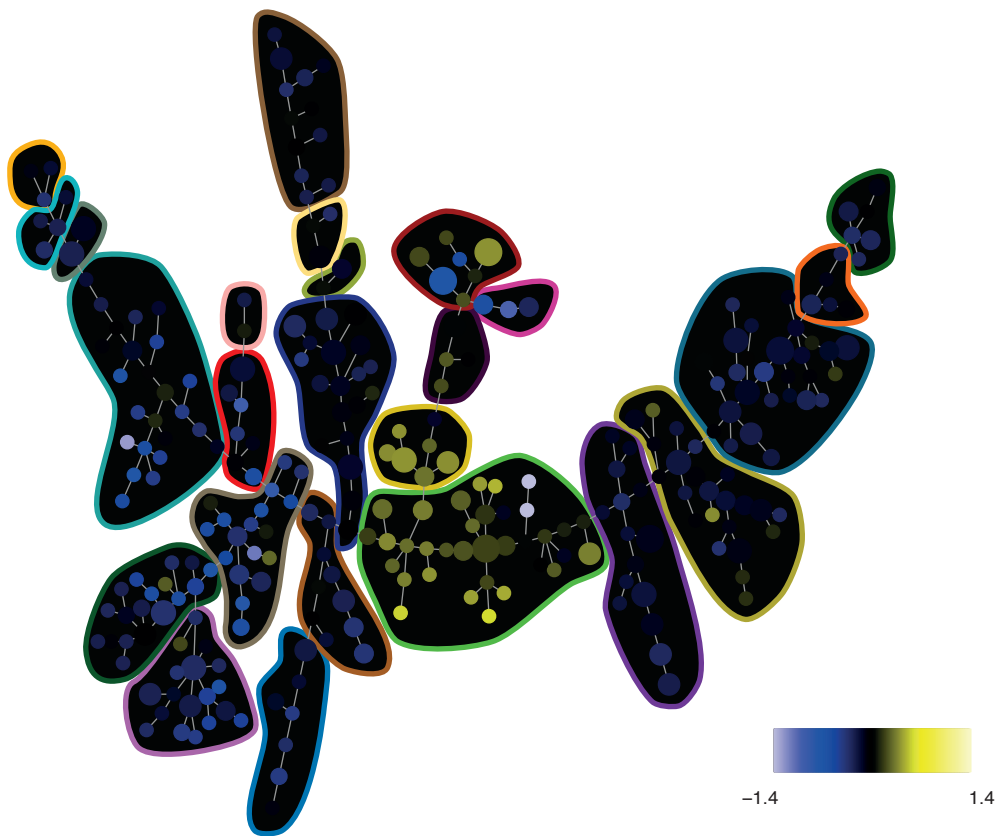



Figure S9A

172-pS6 ---- BCR vs Ref Ratio

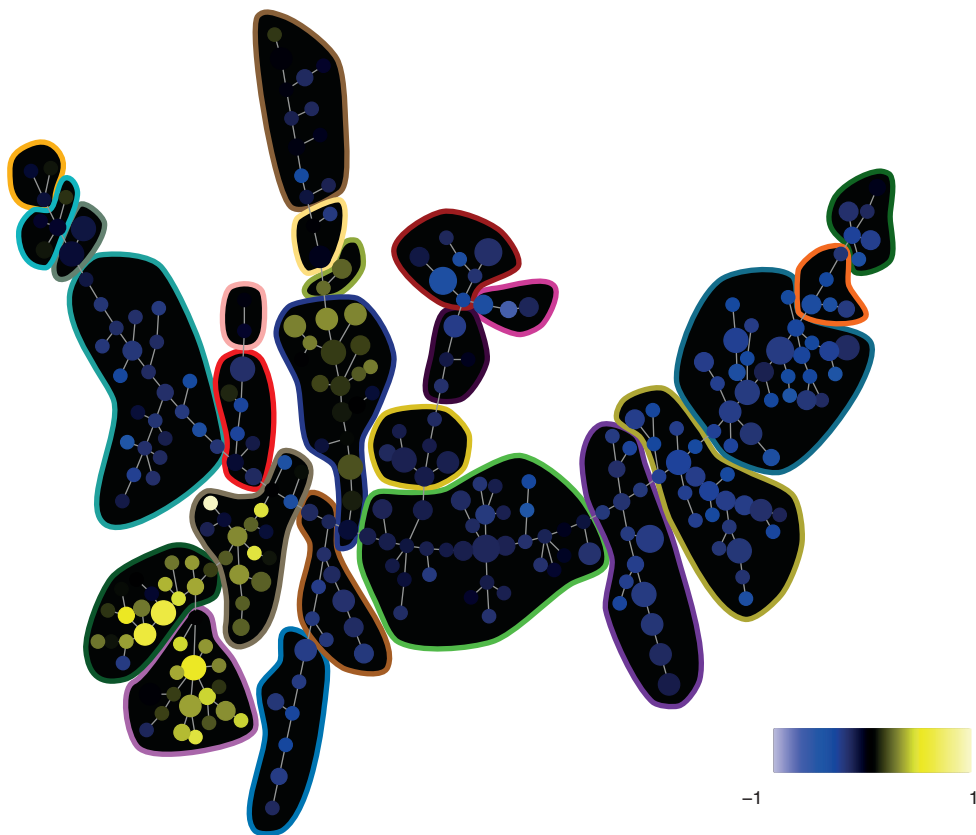

Figure S9A

172-pS6 --- DMSO vs Ref Ratio

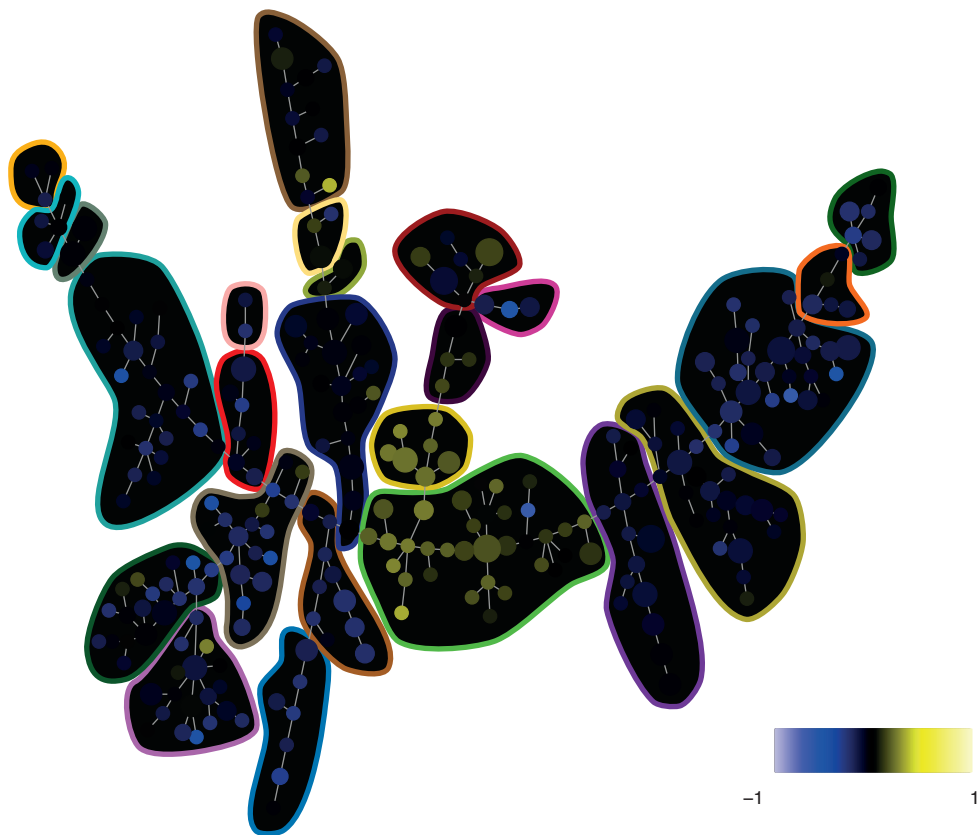

Figure S9A

172-pS6 ---- Flt3L vs Ref Ratio

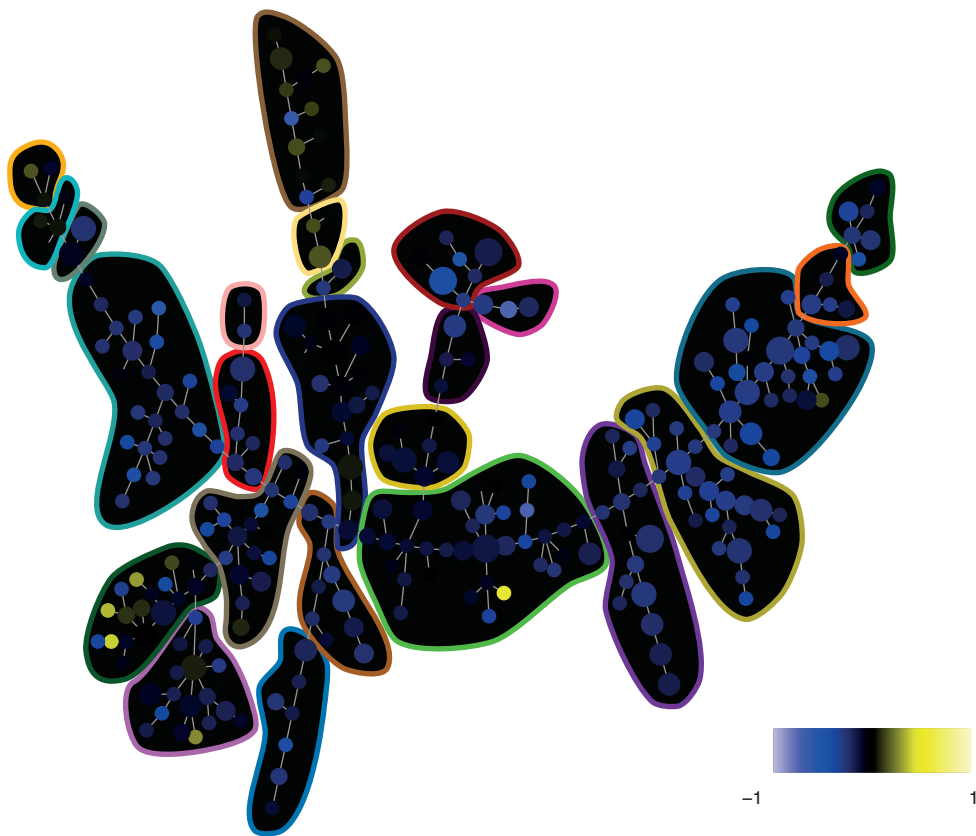

Figure S9A

172-pS6 ---- GCSF vs Ref Ratio

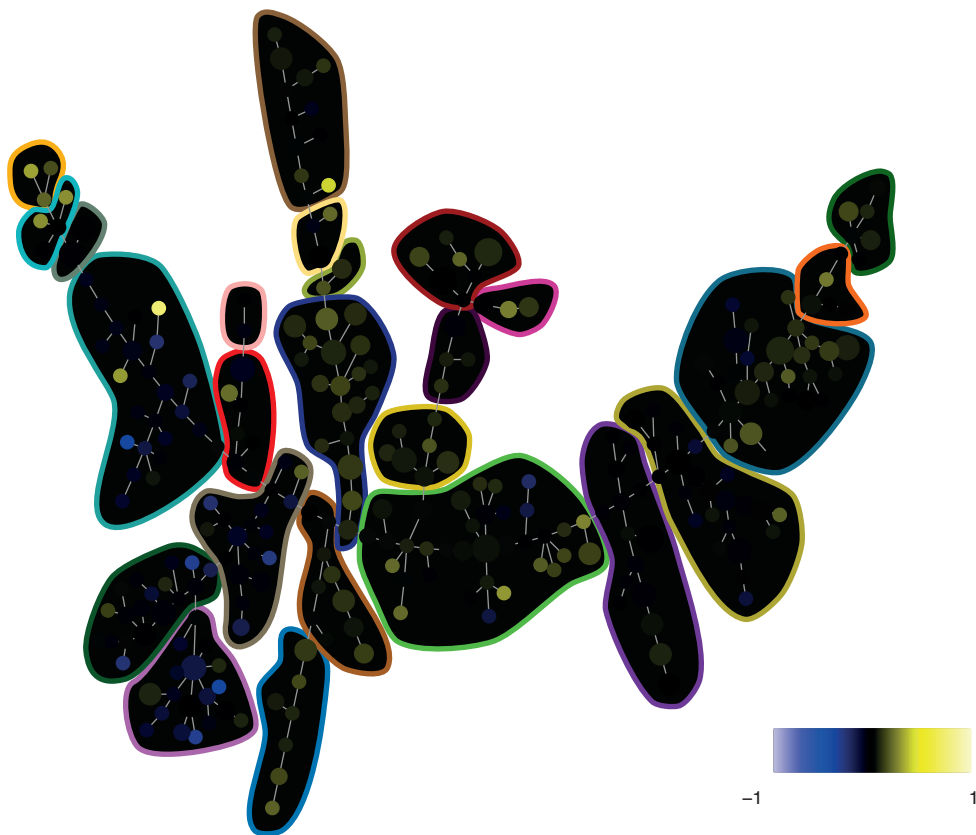

Figure S9A

172-pS6 ---- GMCSF vs Ref Ratio

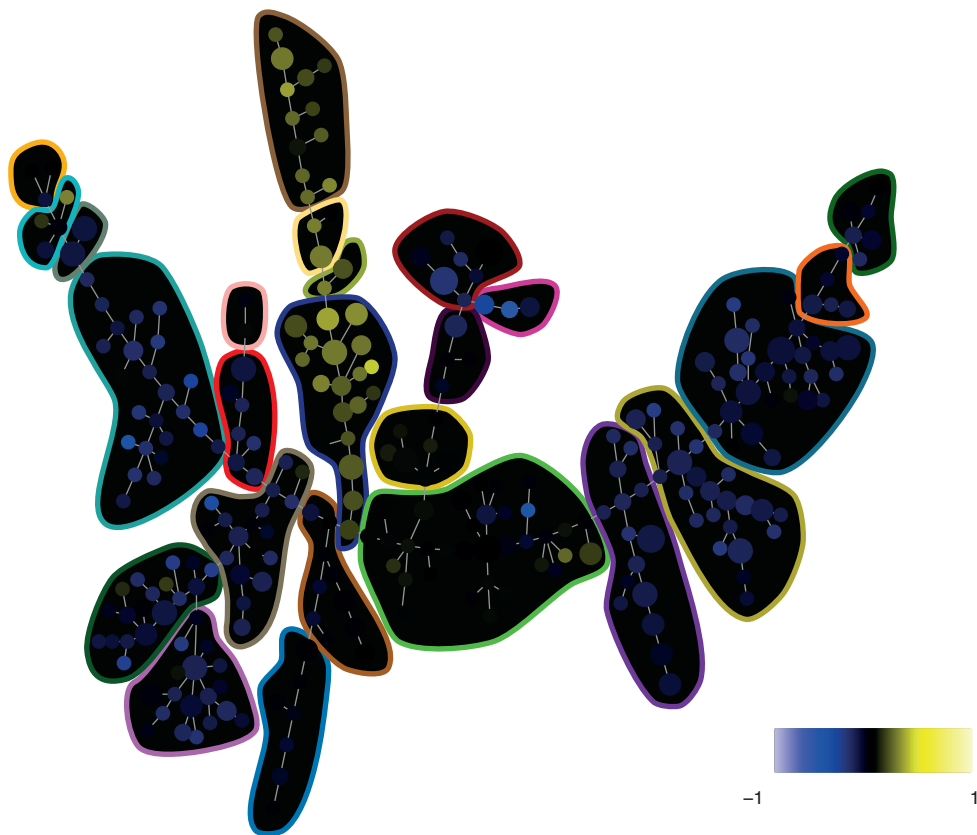

Figure S9A

172-pS6 ---- IFNad vs Ref Ratio

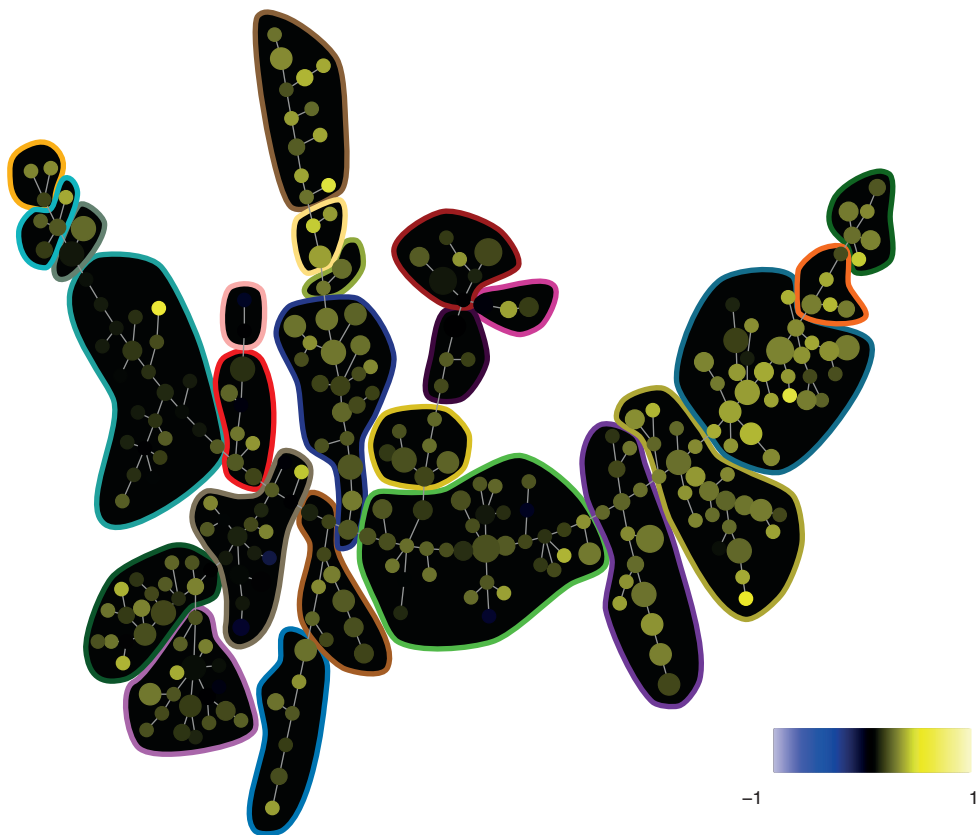

Figure S9A

172-pS6 ---- IL3 vs Ref Ratio

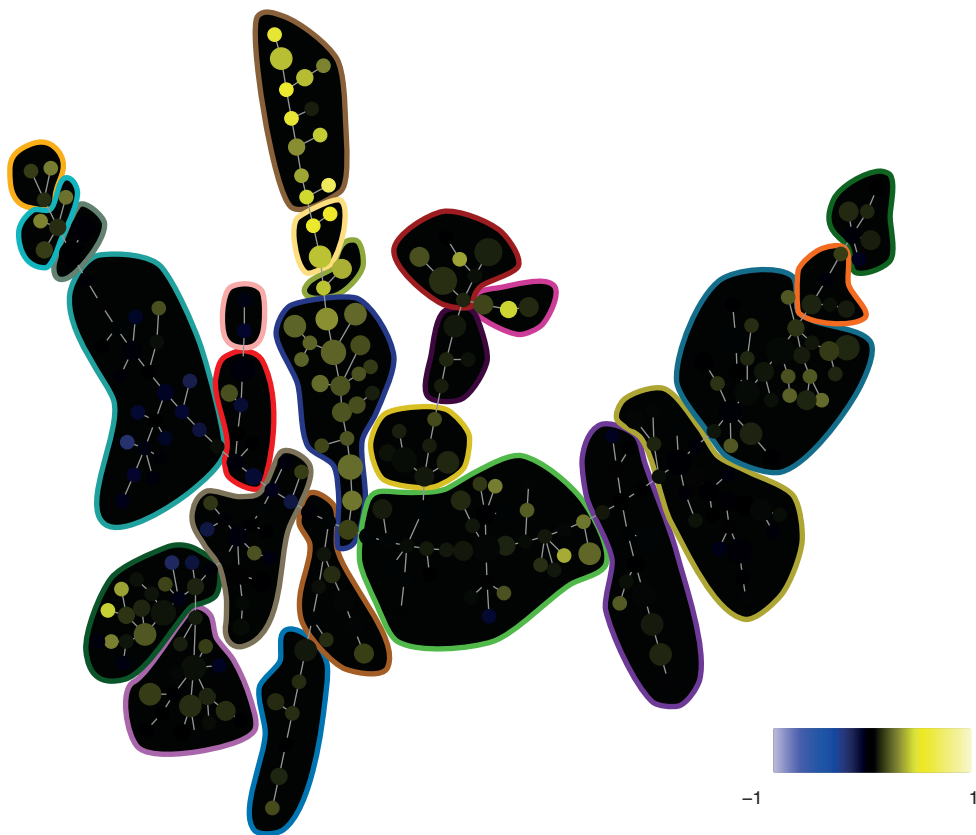

Figure S9A

172-pS6 ---- IL7 vs Ref Ratio

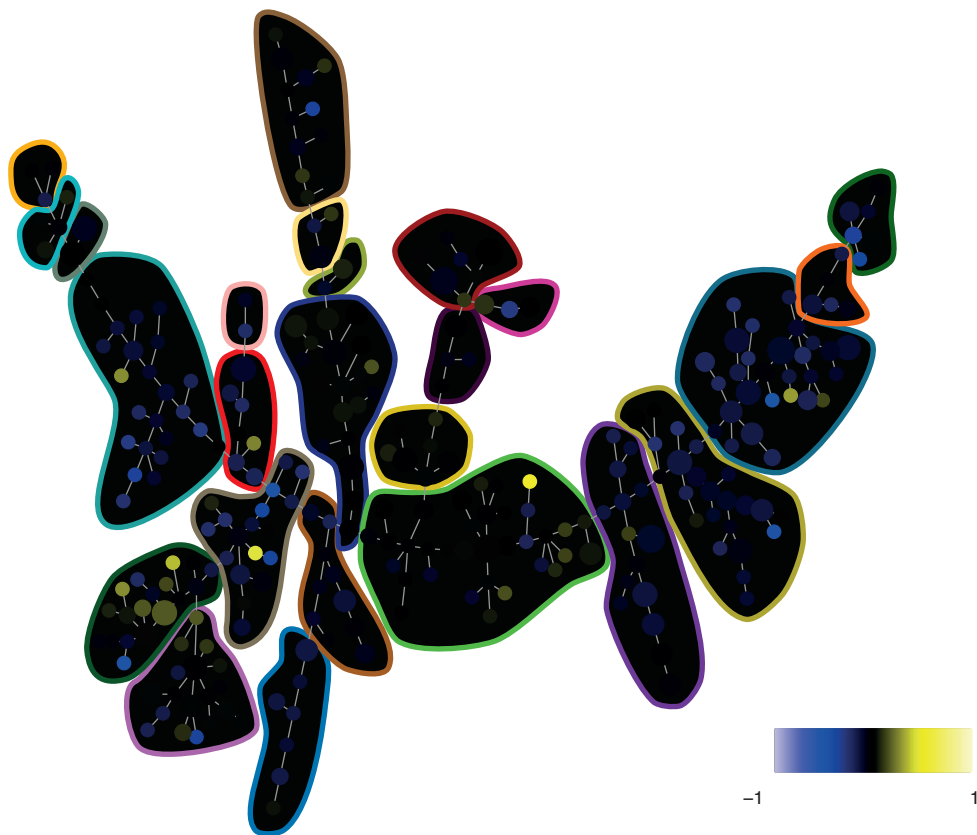



Figure S9A

172-pS6 --- LPS vs Ref Ratio

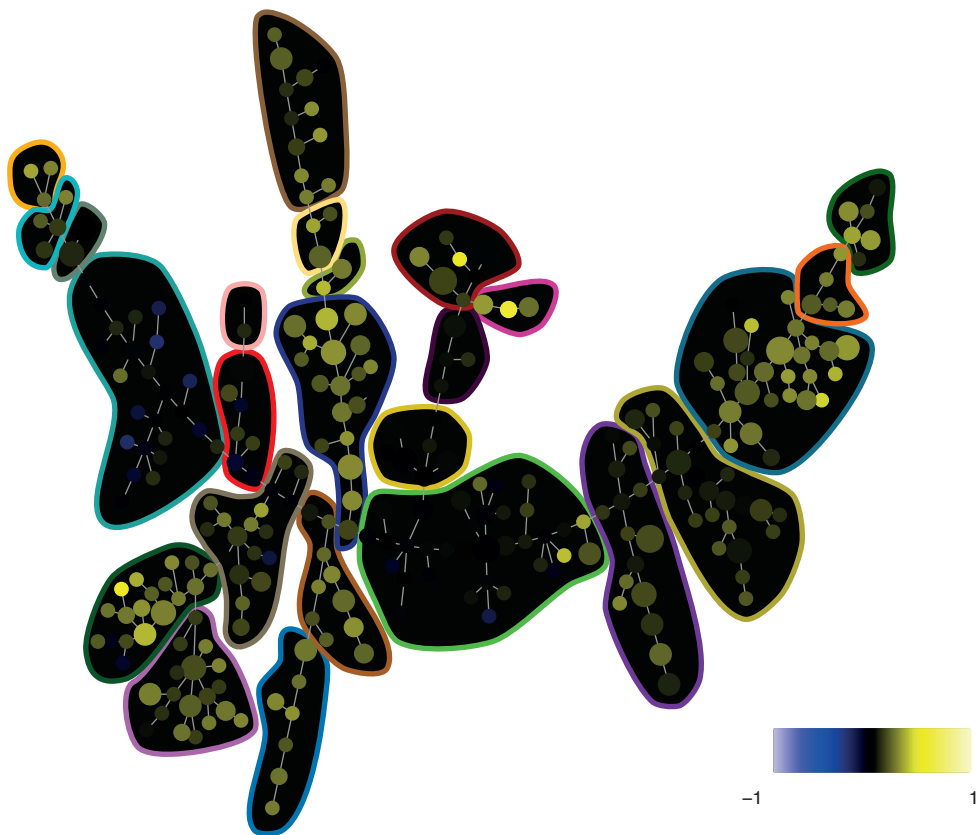

Figure S9A

172-pS6 ---- PMAiono vs Ref Ratio

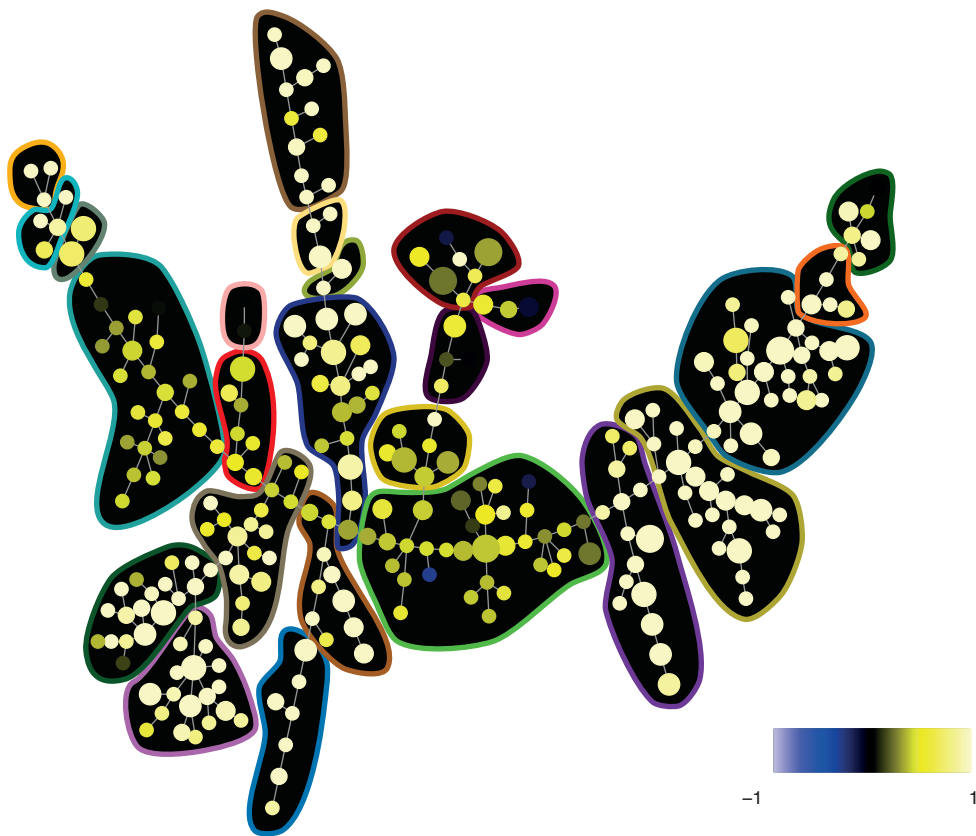

Figure S9A

172-pS6 ---- PVO4 vs Ref Ratio

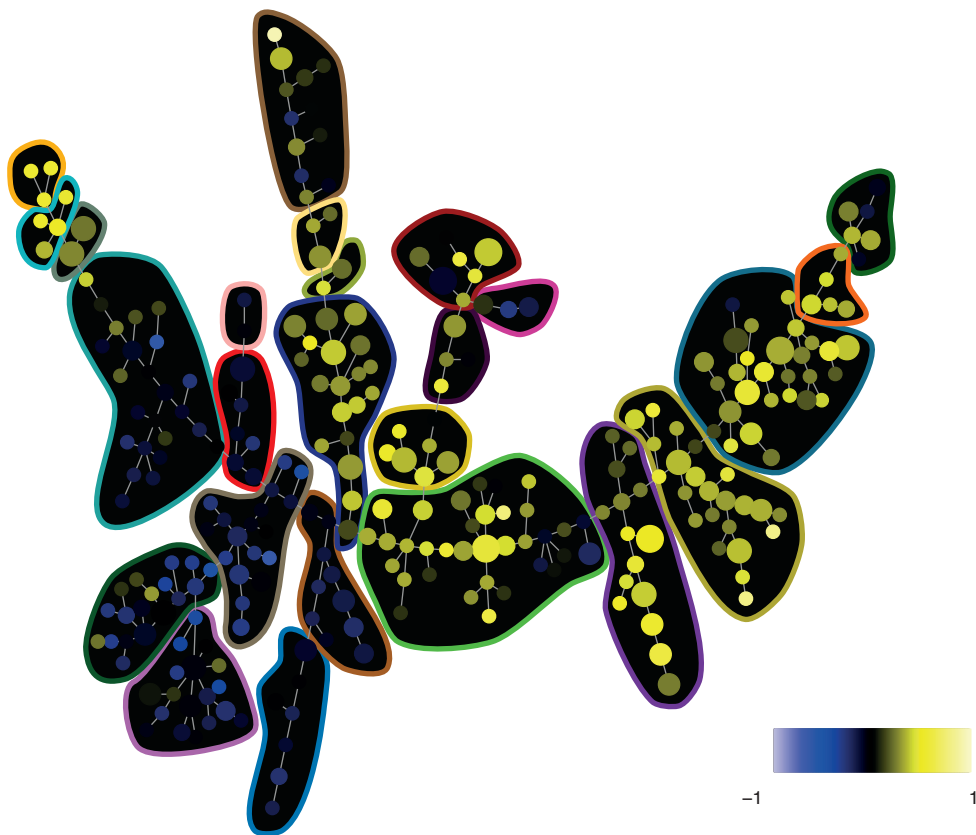

Figure S9A

172-pS6 ---- SCF vs Ref Ratio

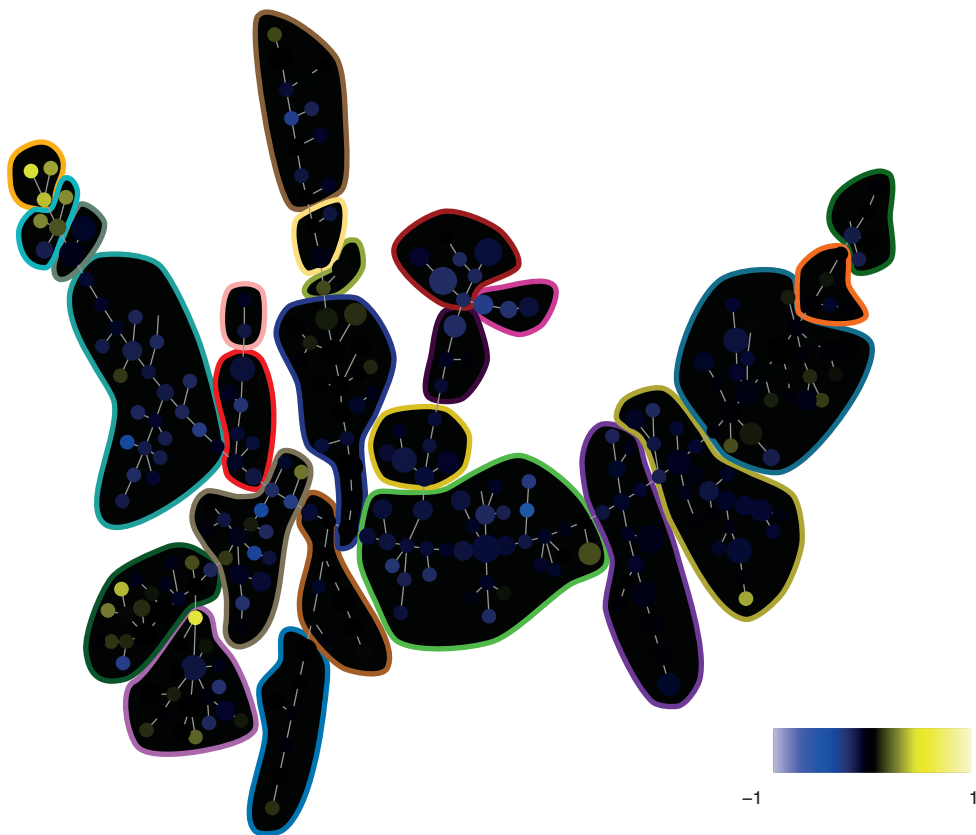

Figure S9A

172-pS6 ---- TNFa vs Ref Ratio

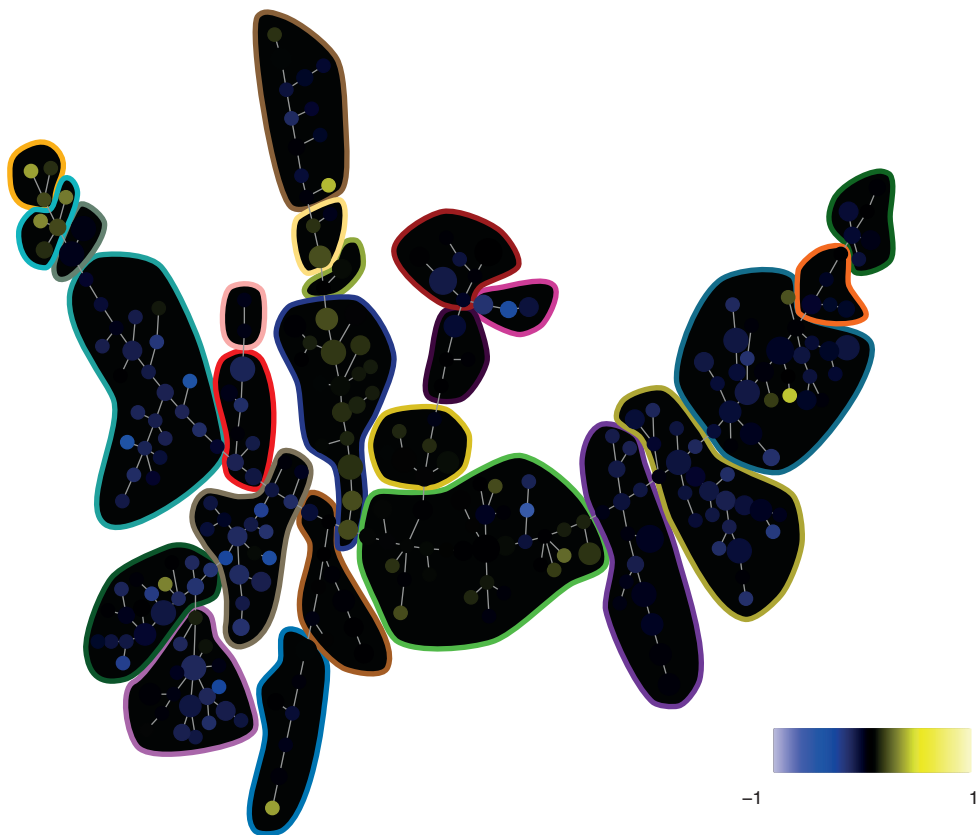

Figure S9A

172-pS6 --- TPO vs Ref Ratio

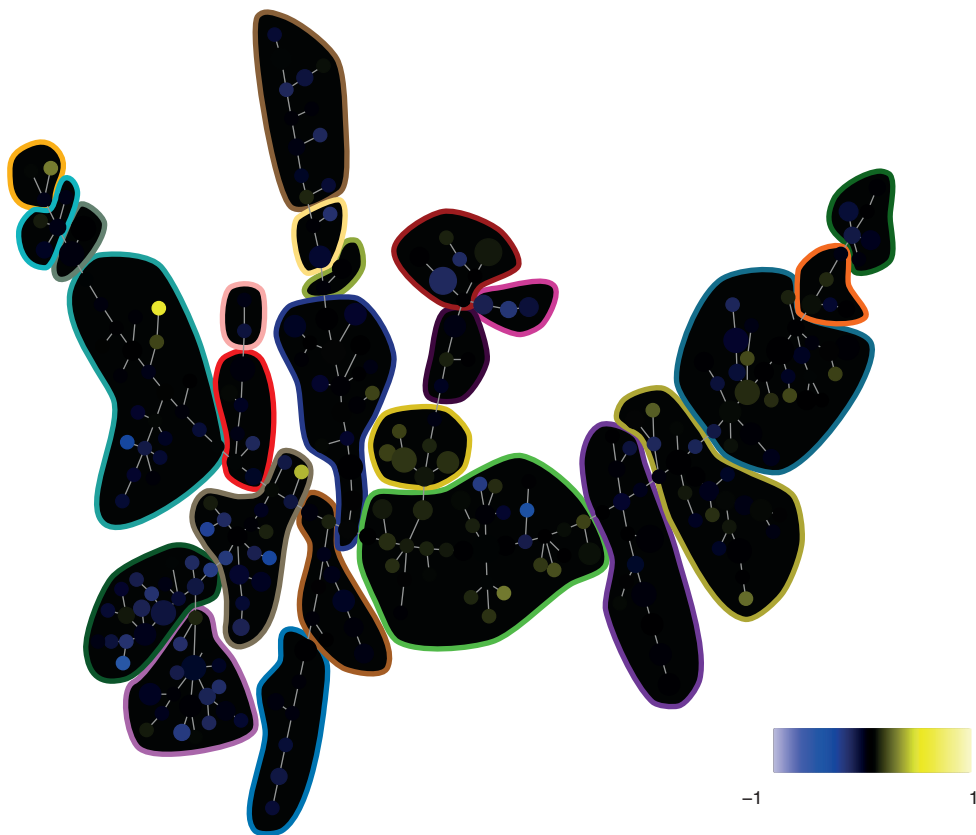

Figure S9A

174-pSrcFK ---- BCR vs Ref Ratio

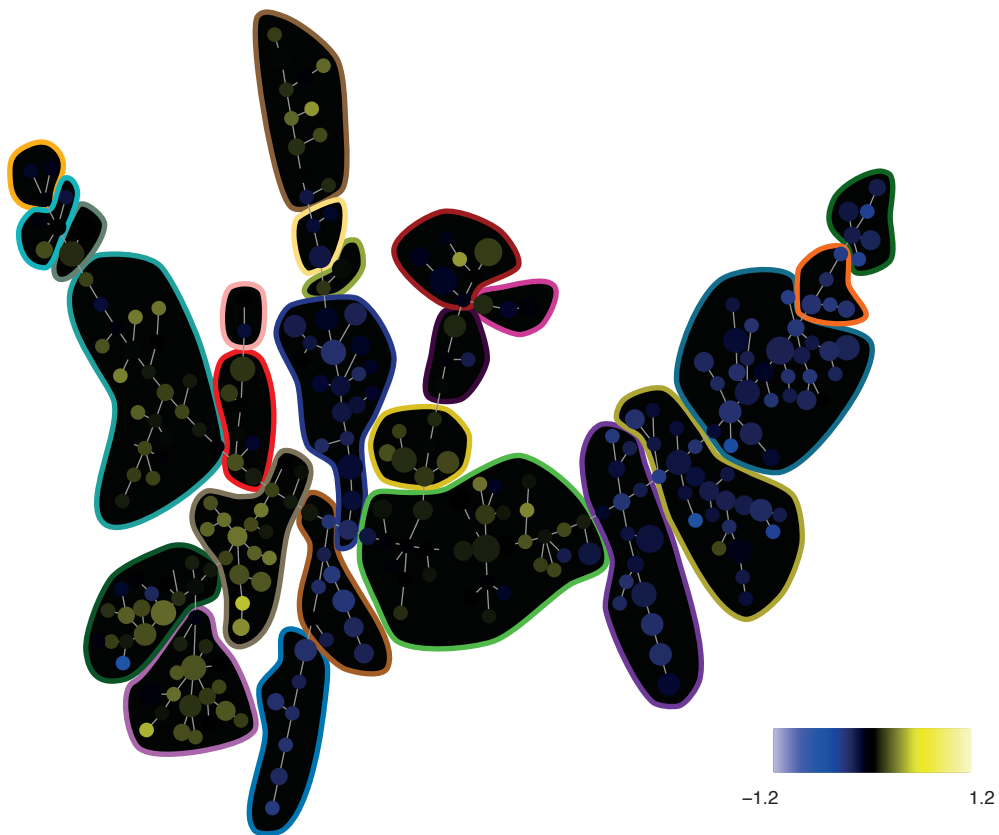

Figure S9A

174-pSrcFK ---- DMSO vs Ref Ratio

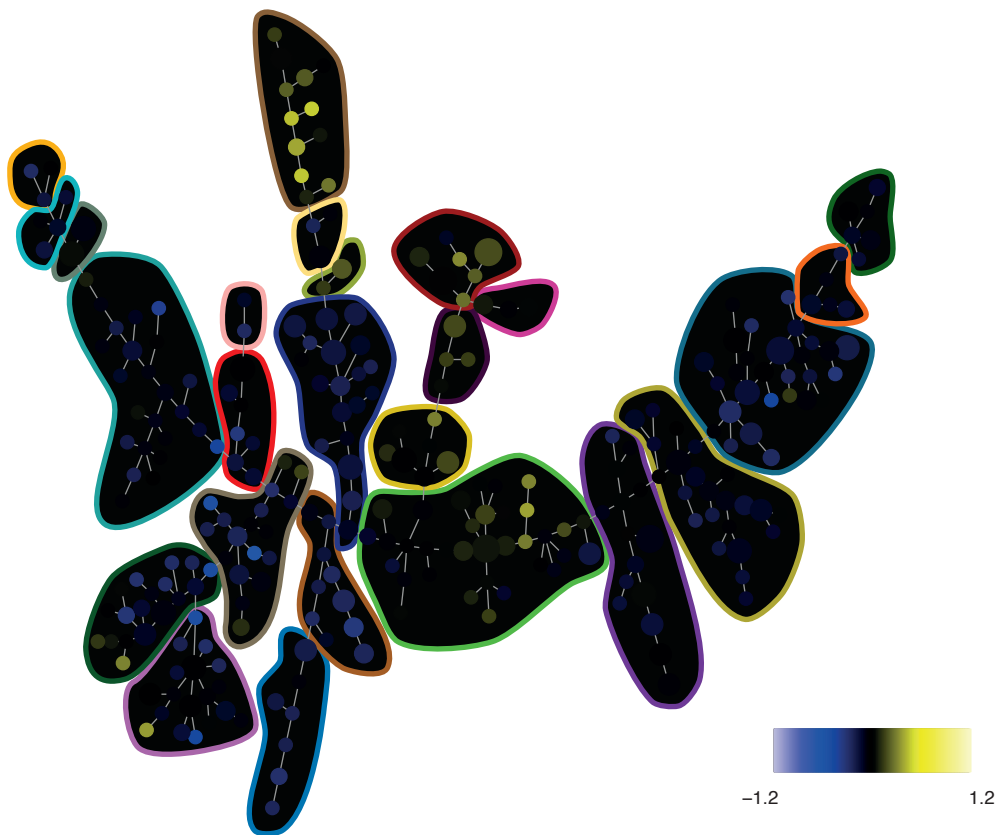



Figure S9A

174-pSrcFK --- Flt3L vs Ref Ratio

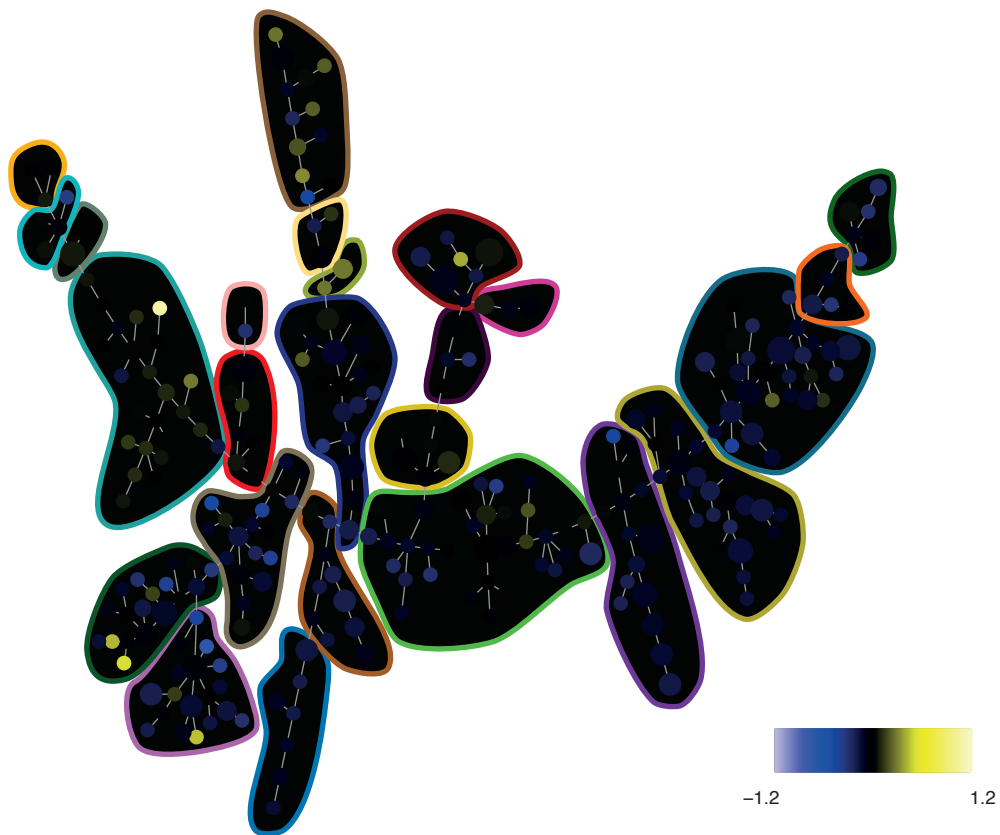

Figure S9A

174-pSrcFK ---- GCSF vs Ref Ratio

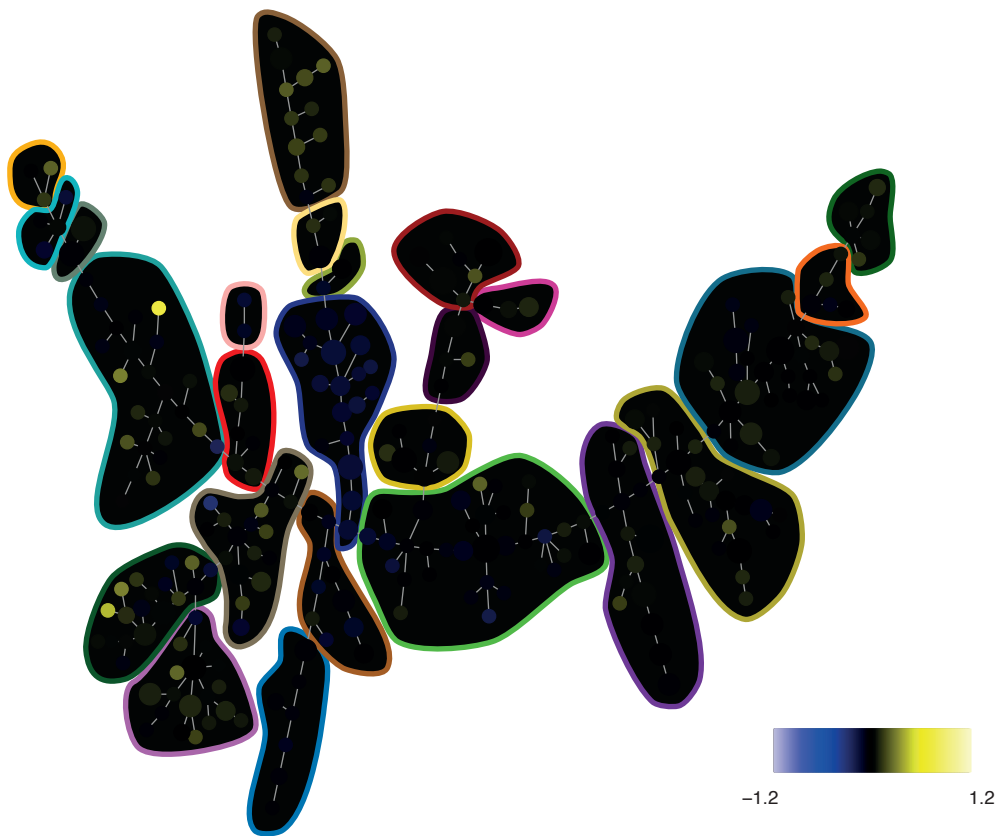

Figure S9A

174-pSrcFK ---- GMCSF vs Ref Ratio

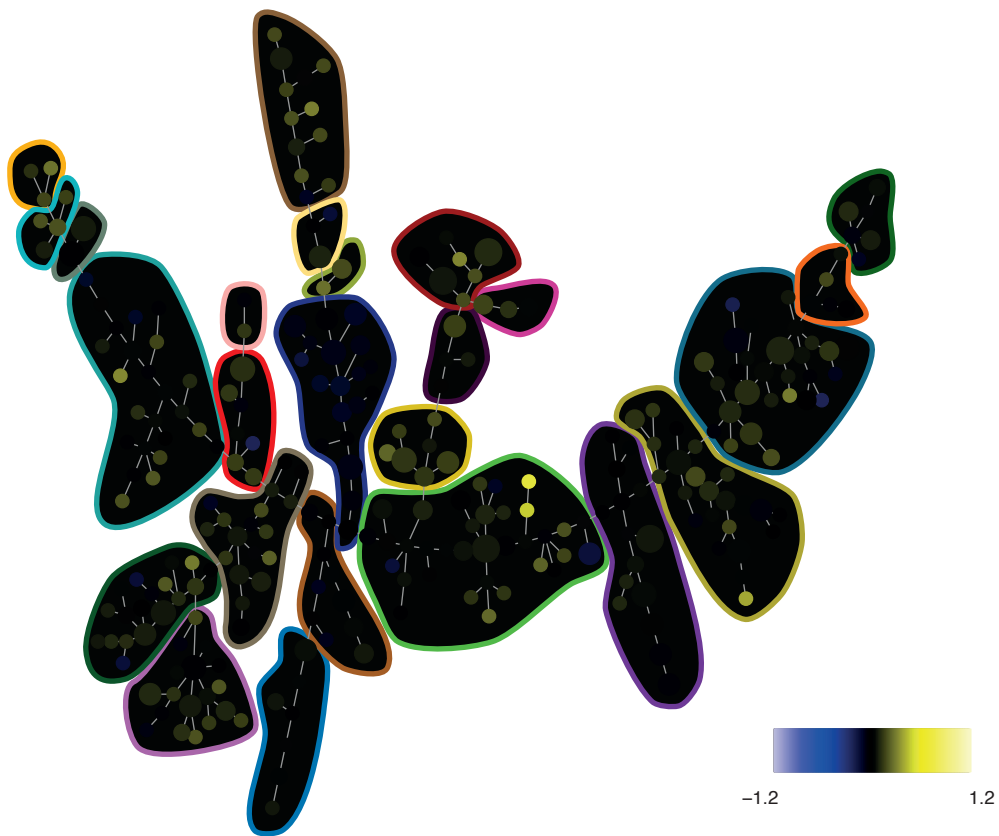

Figure S9A

174-pSrcFK ---- IFNad vs Ref Ratio

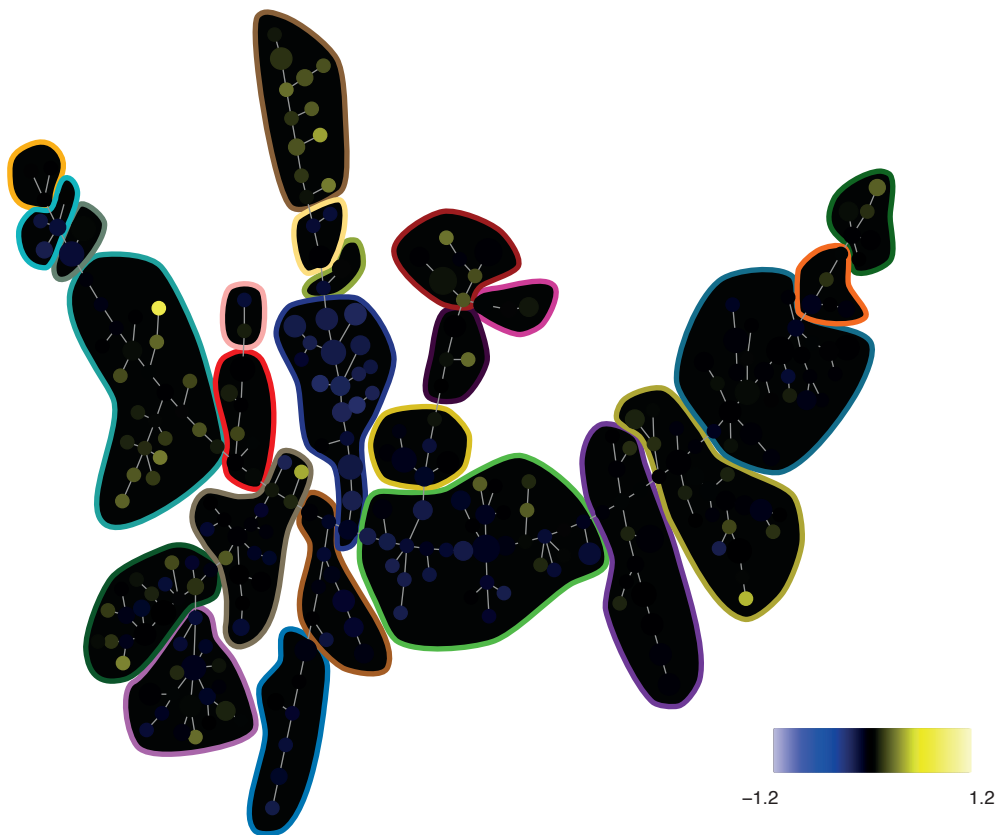

Figure S9A

174-pSrcFK — IL3 vs Ref Ratio

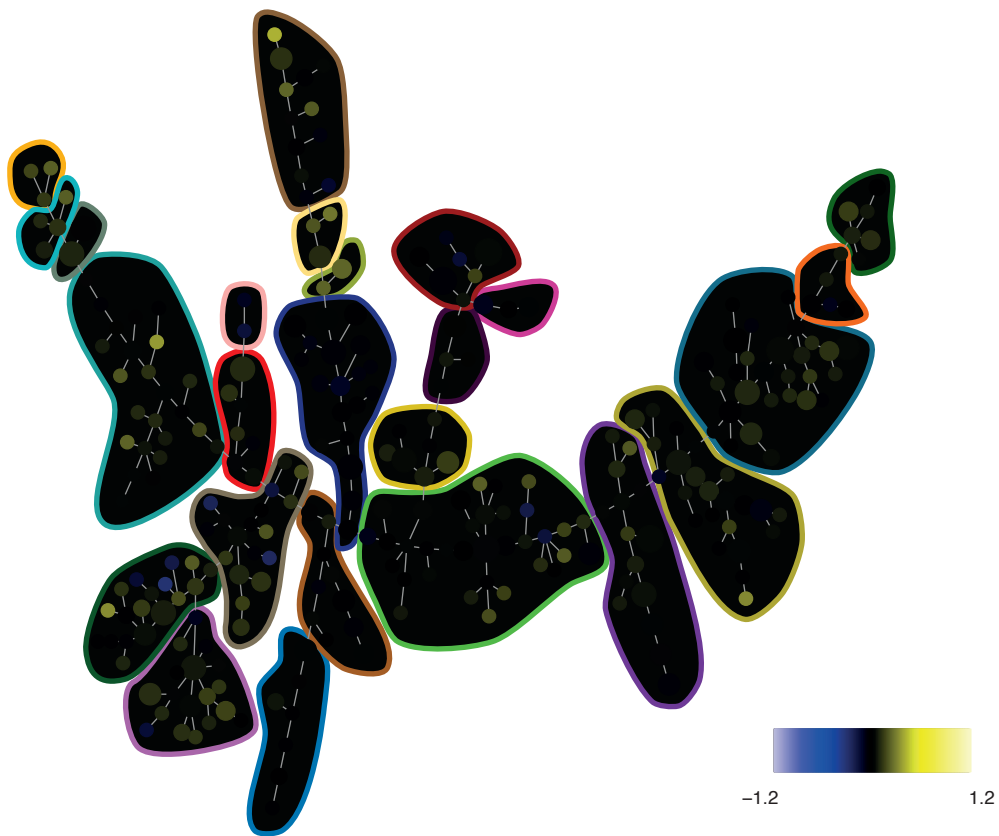

Figure S9A

174-pSrcFK — IL7 vs Ref Ratio

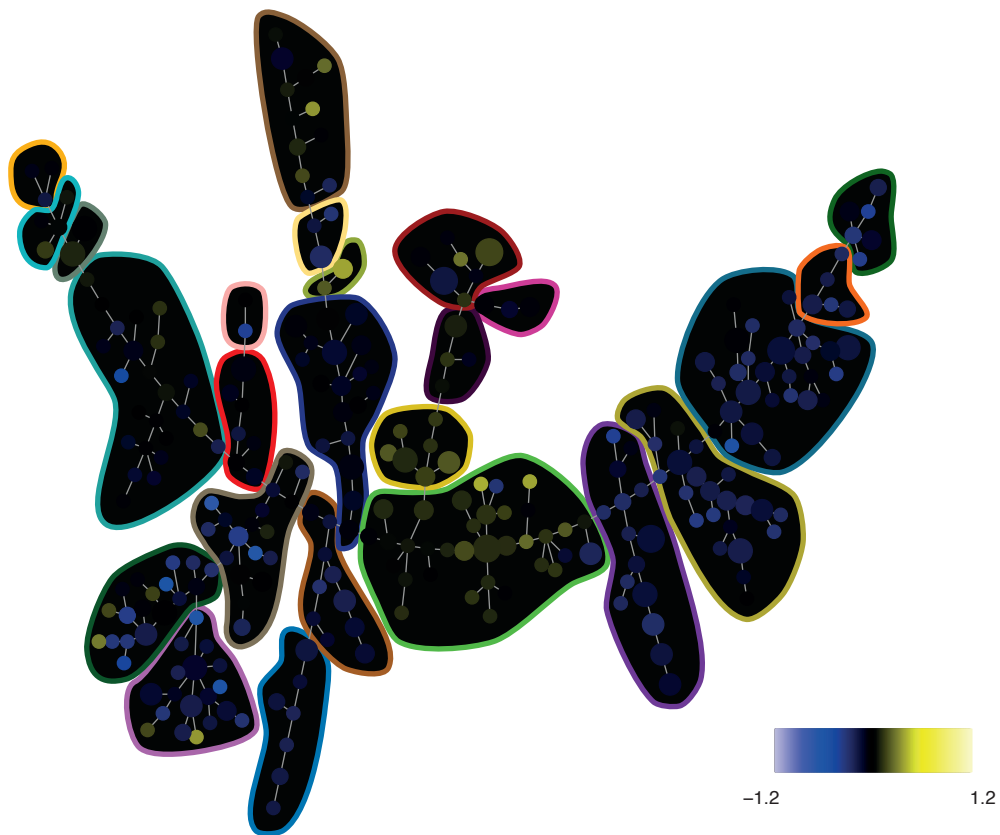

Figure S9A

174-pSrcFK ---- LPS vs Ref Ratio

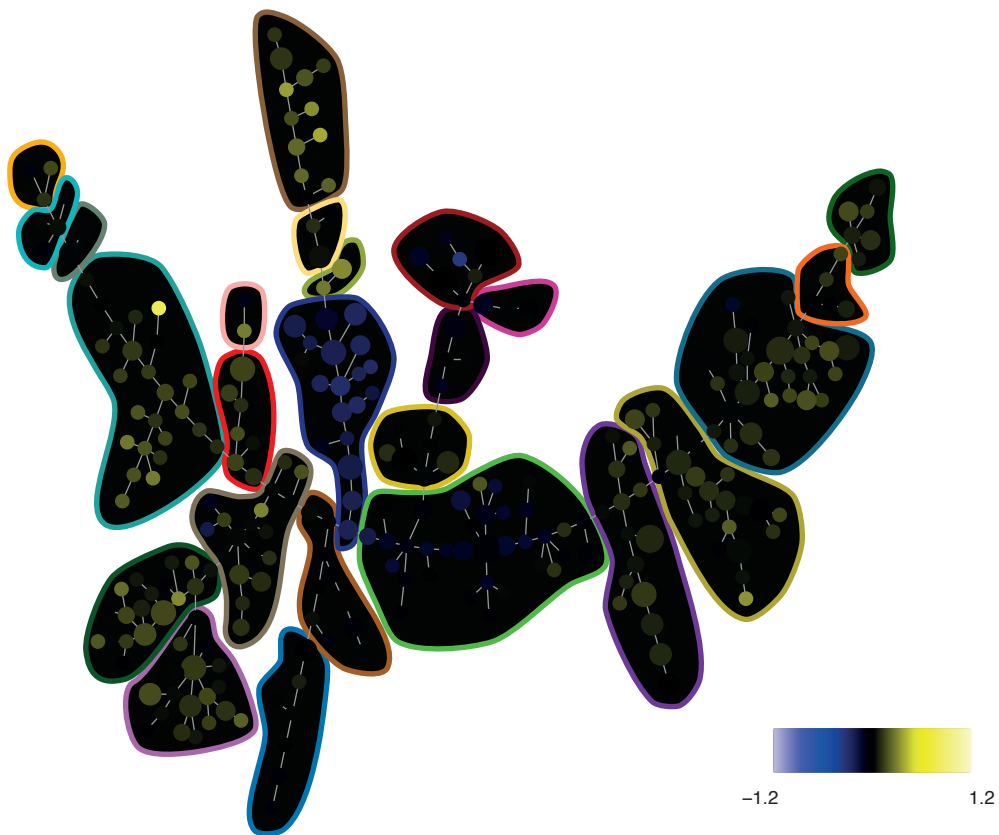

Figure S9A

174-pSrcFK ---- PMAiono vs Ref Ratio

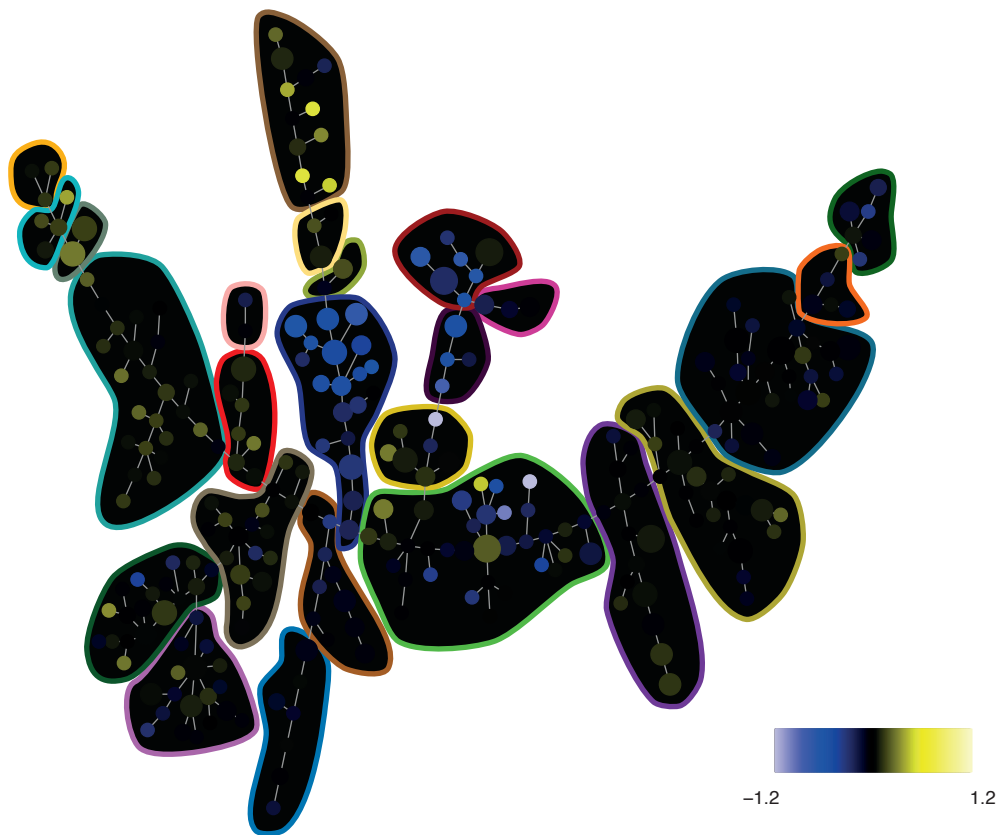



Figure S9A

174-pSrcFK ---- PVO4 vs Ref Ratio

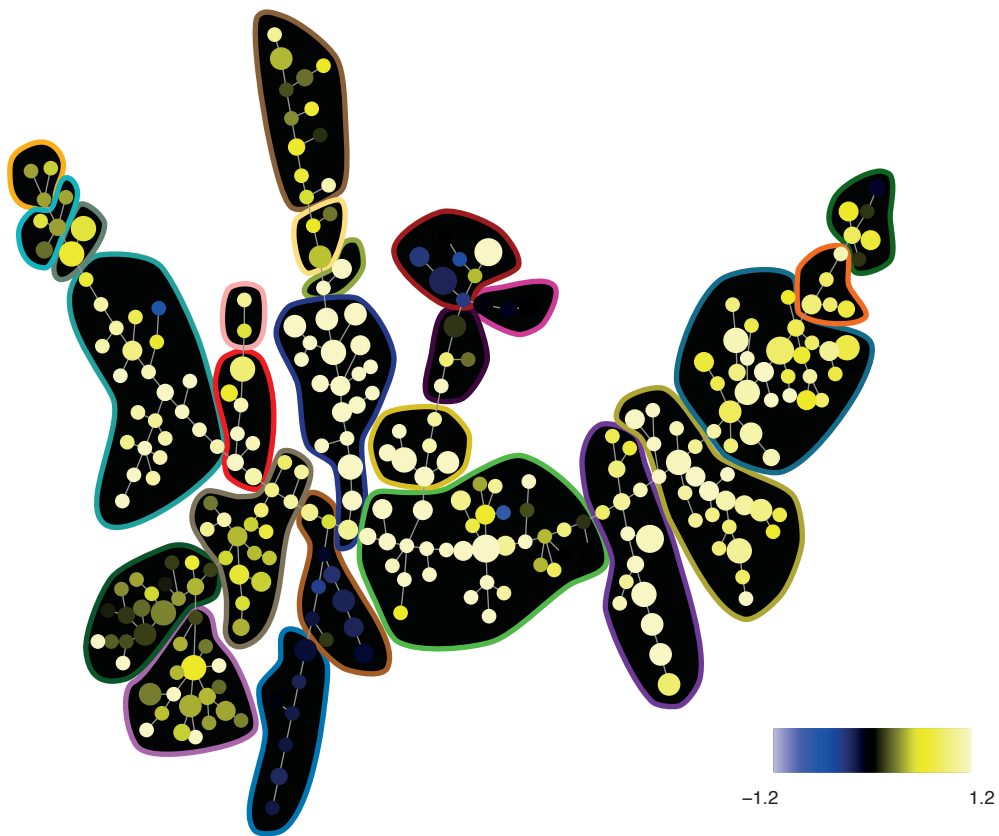

Figure S9A

174-pSrcFK ---- SCF vs Ref Ratio

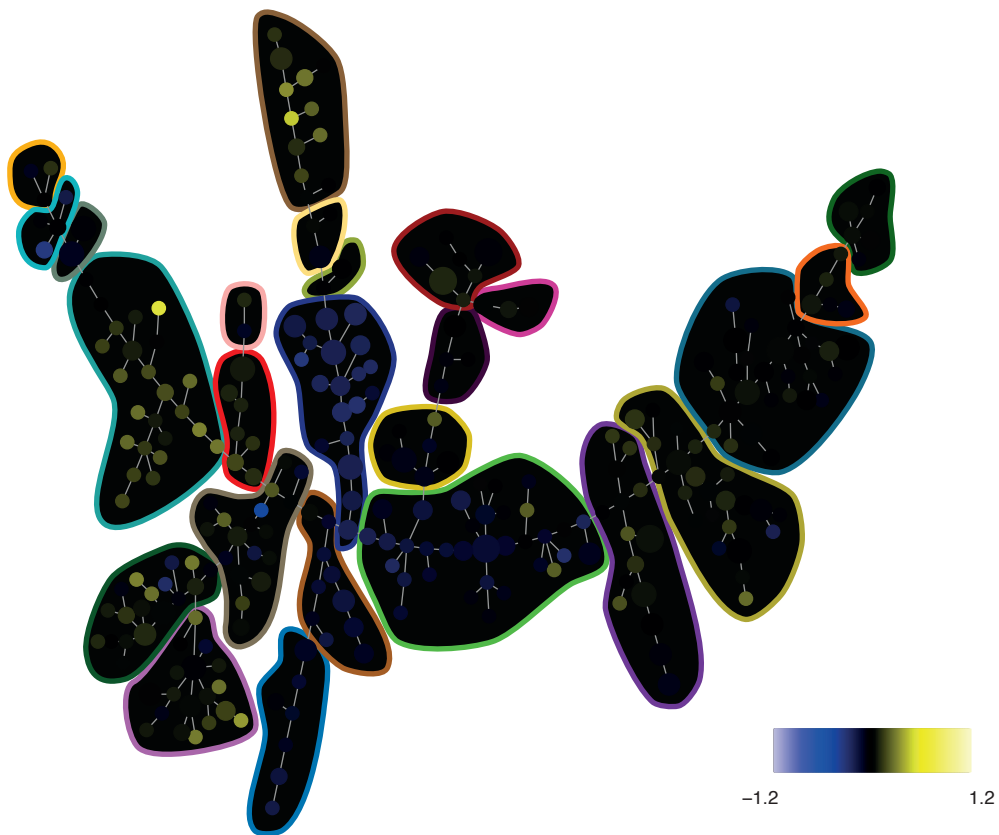

Figure S9A

174-pSrcFK --- TNFa vs Ref Ratio

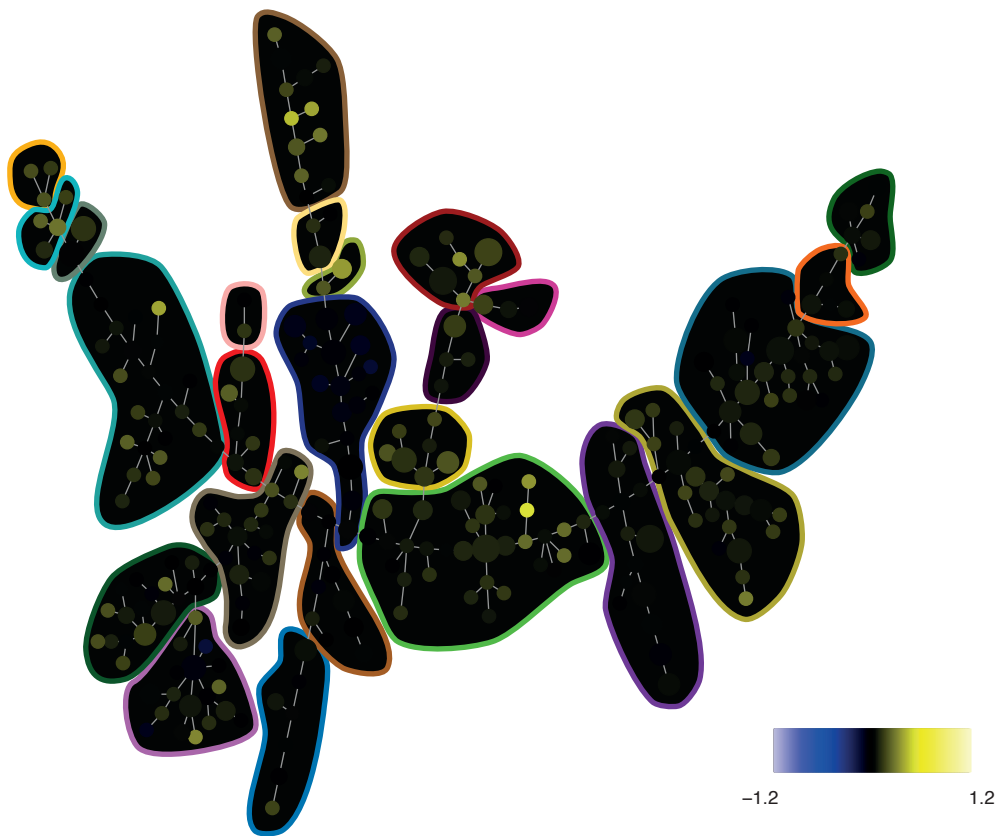

Figure S9A

174-pSrcFK ---- TPO vs Ref Ratio

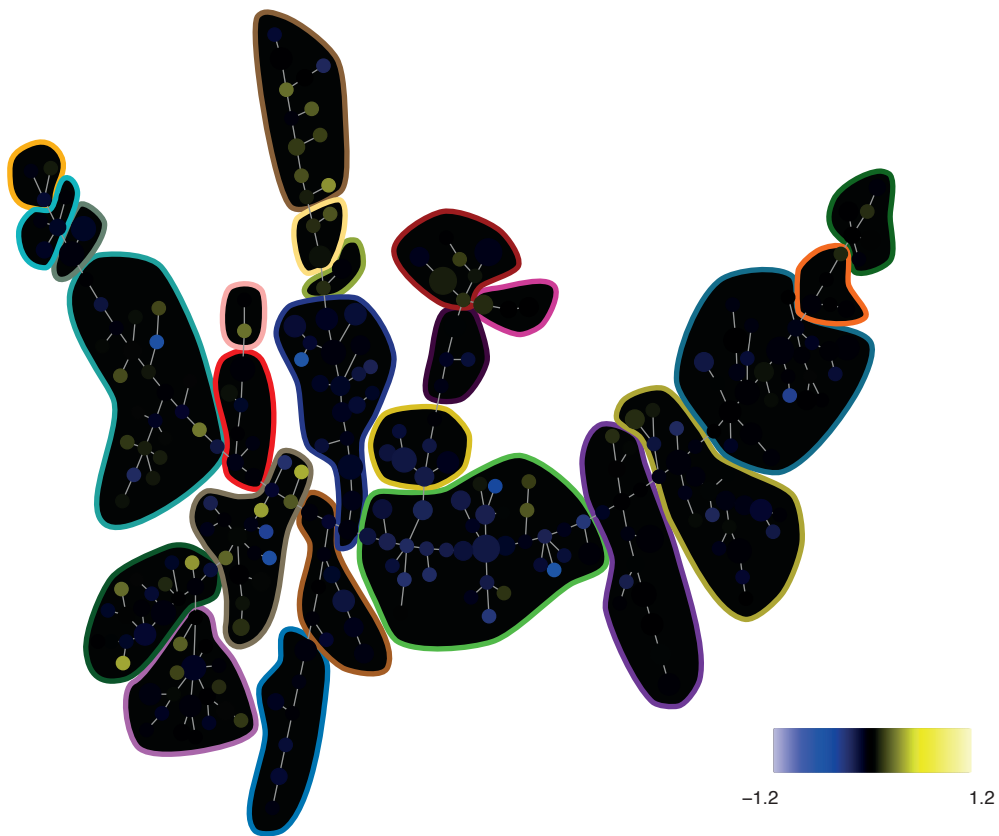

Figure S9A

175-pCrkL ---- BCR vs Ref Ratio

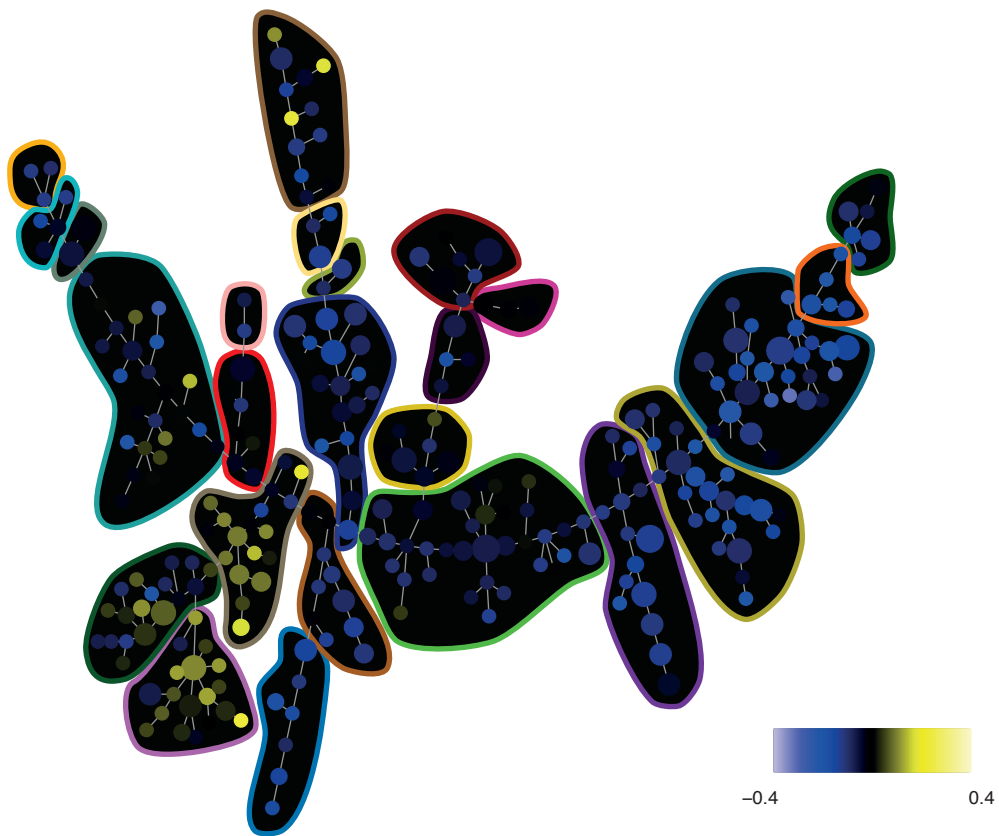

Figure S9A

175-pCrkL ---- DMSO vs Ref Ratio

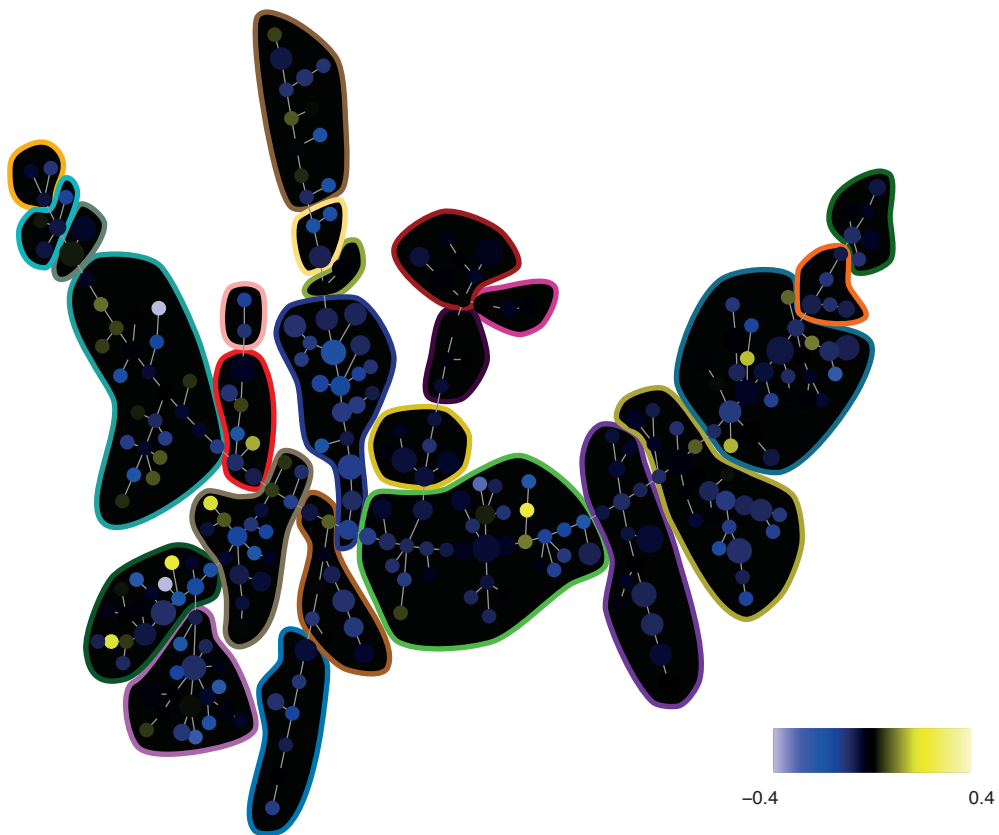

Figure S9A

175-pCrkL ---- Flt3L vs Ref Ratio

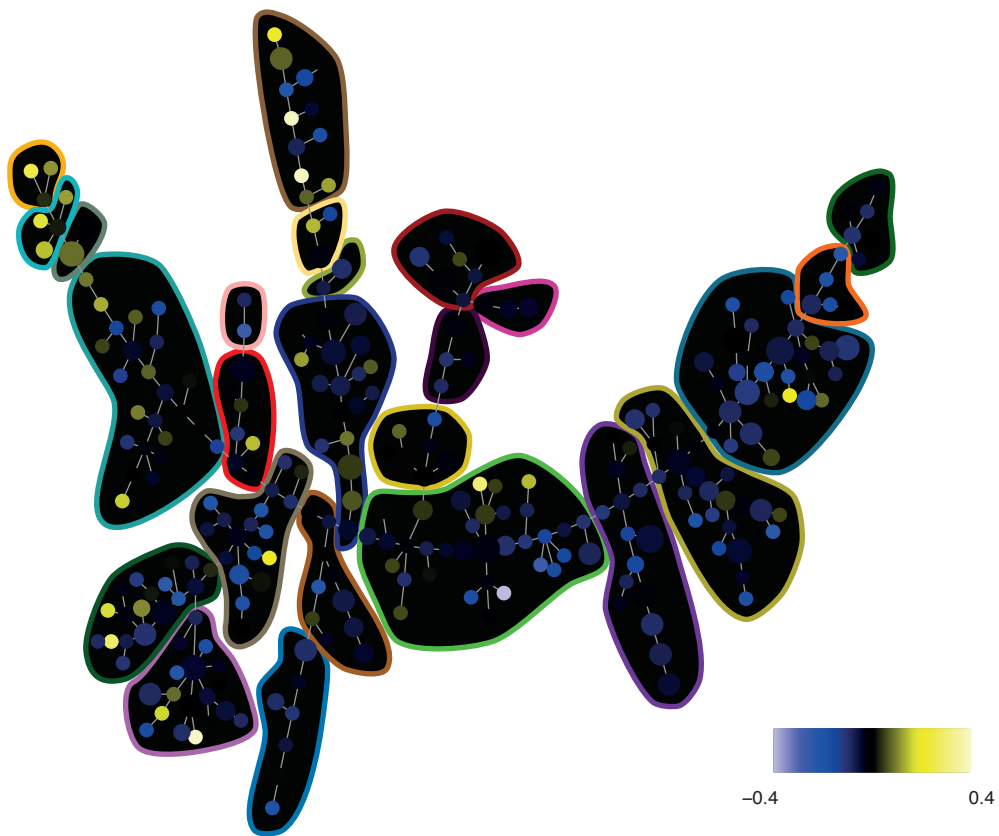

Figure S9A

175-pCrkL --- GCSF vs Ref Ratio

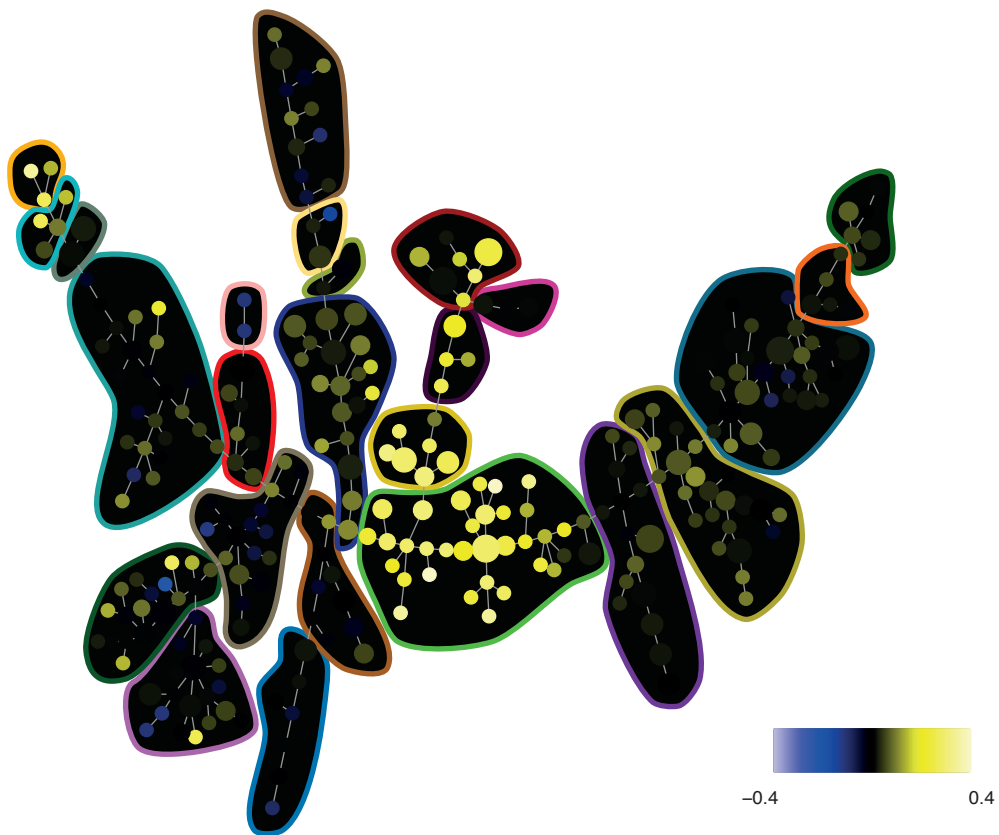



Figure S9A

175-pCrkL ---- GMCSF vs Ref Ratio

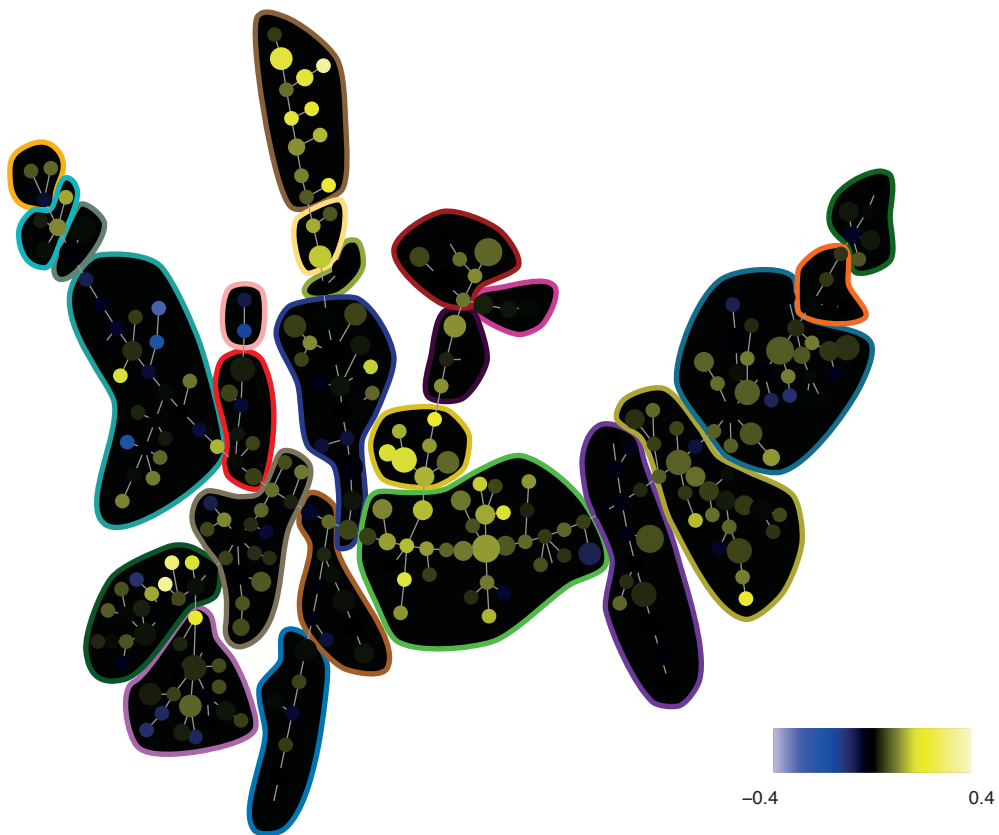

Figure S9A

175-pCrkL --- IFNad vs Ref Ratio

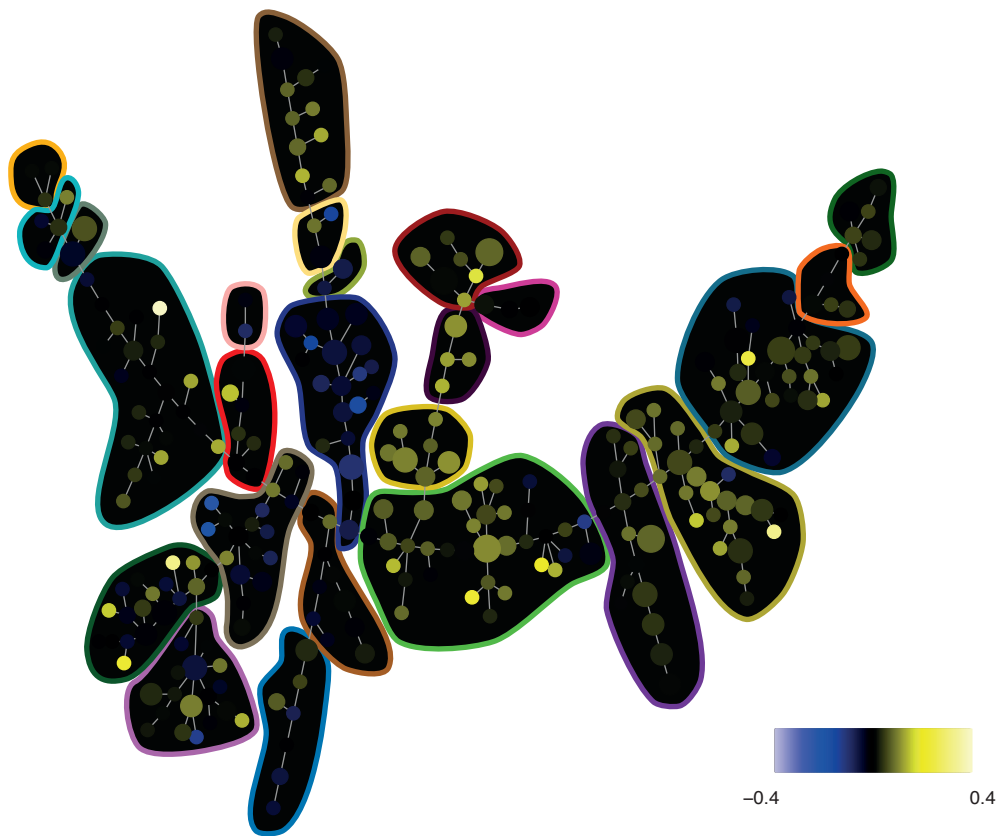

Figure S9A

175-pCrkL ---- IL3 vs Ref Ratio

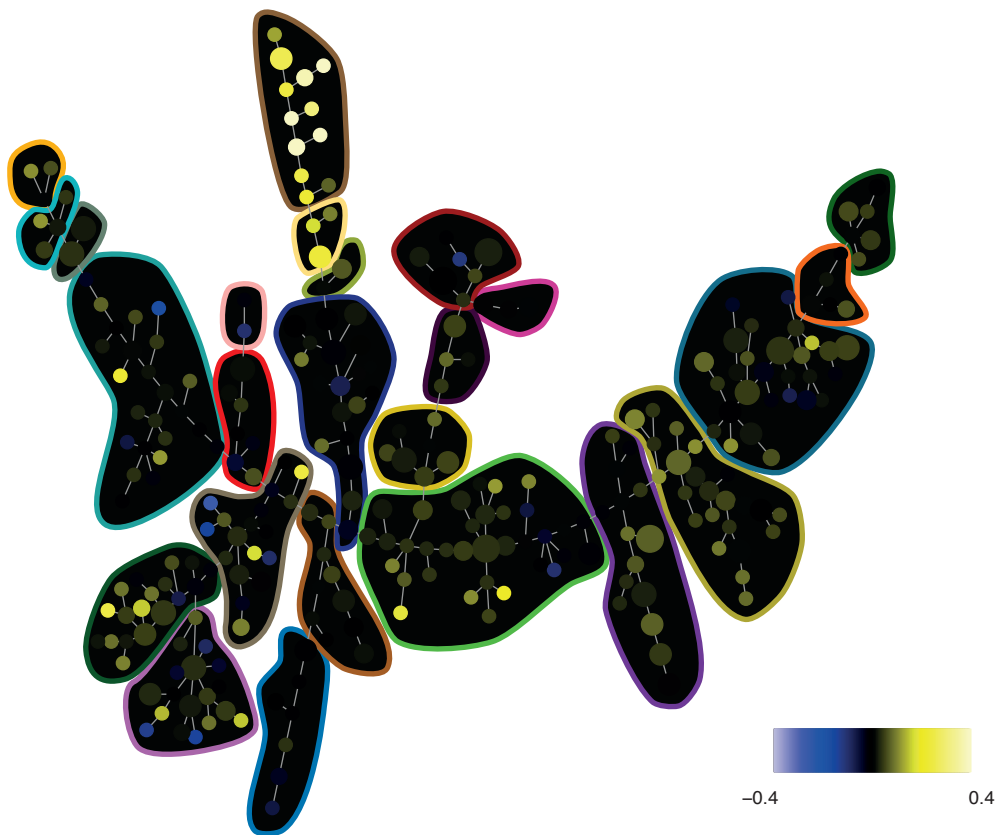

Figure S9A

175-pCrkL ---- IL7 vs Ref Ratio

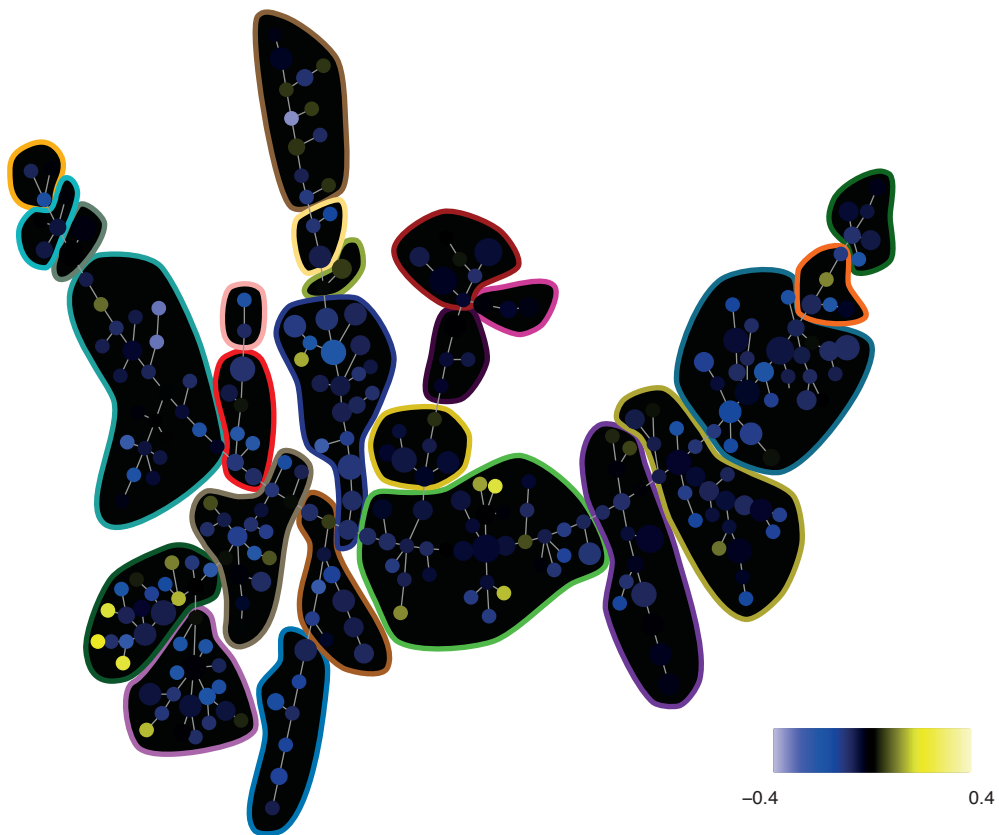

Figure S9A

175-pCrkL ---- LPS vs Ref Ratio

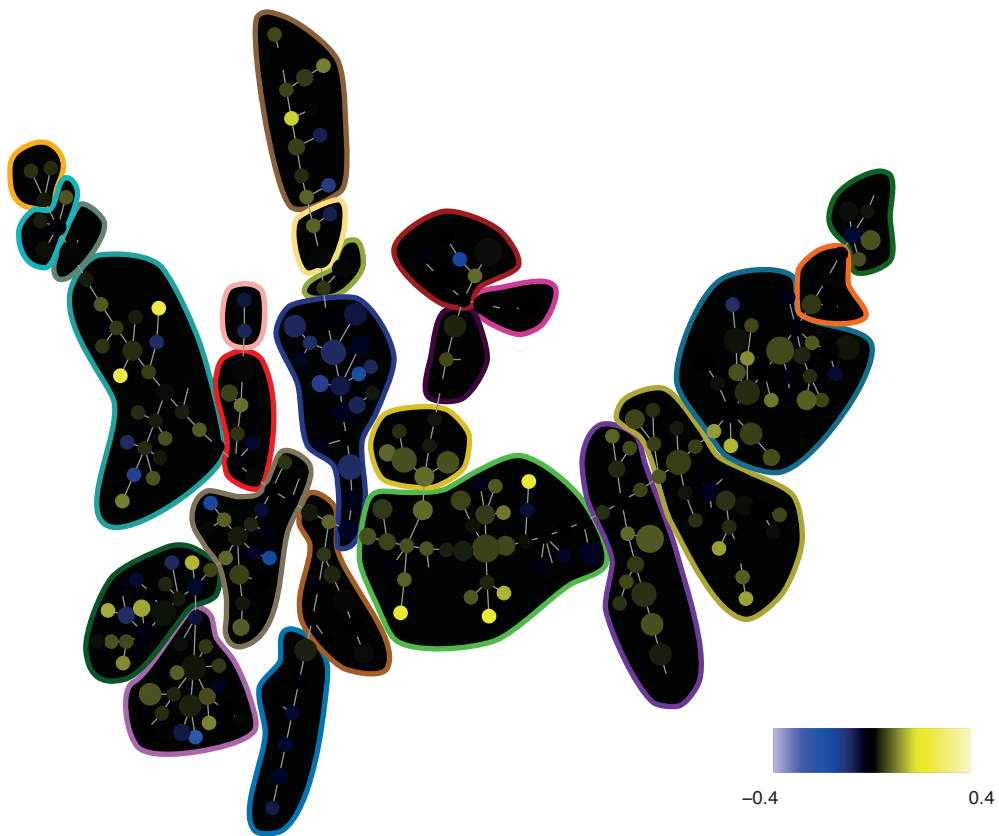

Figure S9A

175-pCrkL ---- PMAiono vs Ref Ratio

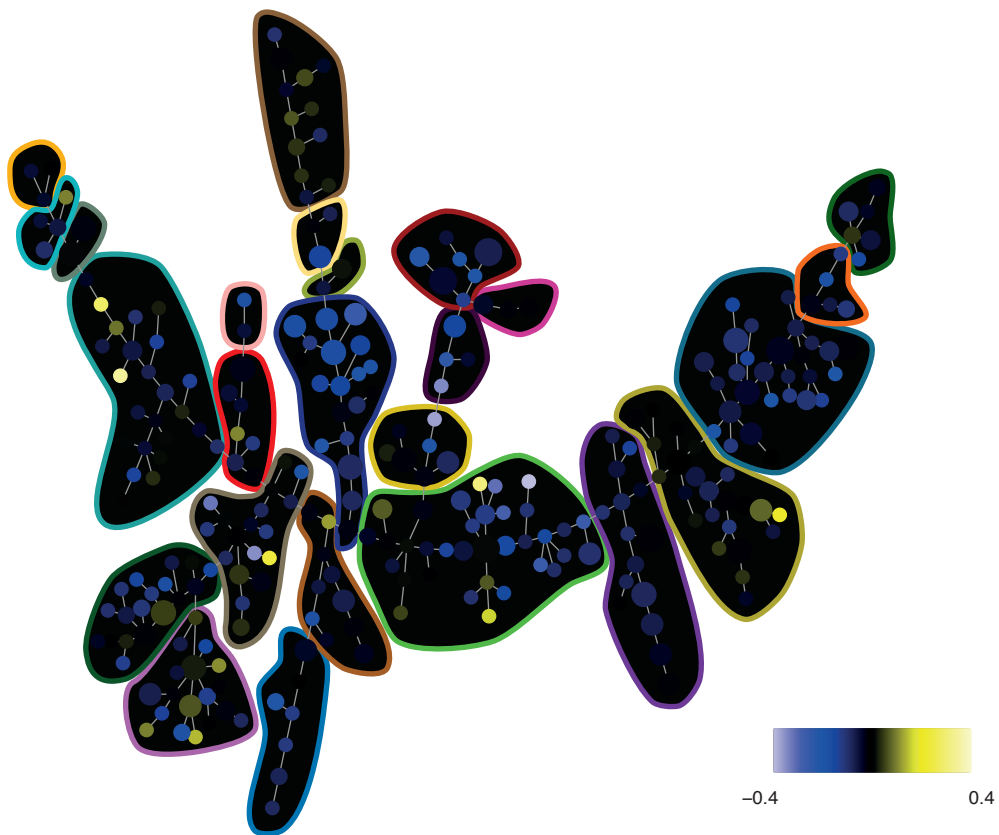

Figure S9A

175-pCrkL ---- PVO4 vs Ref Ratio

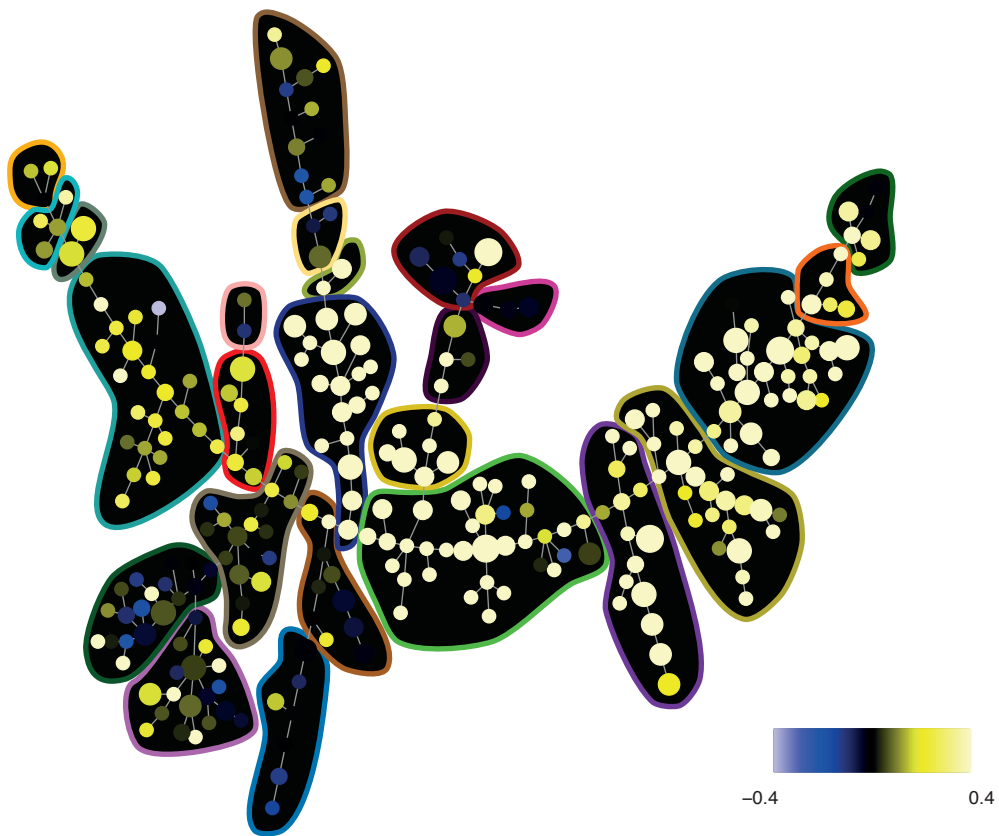

Figure S9A

175-pCrkL ---- SCF vs Ref Ratio

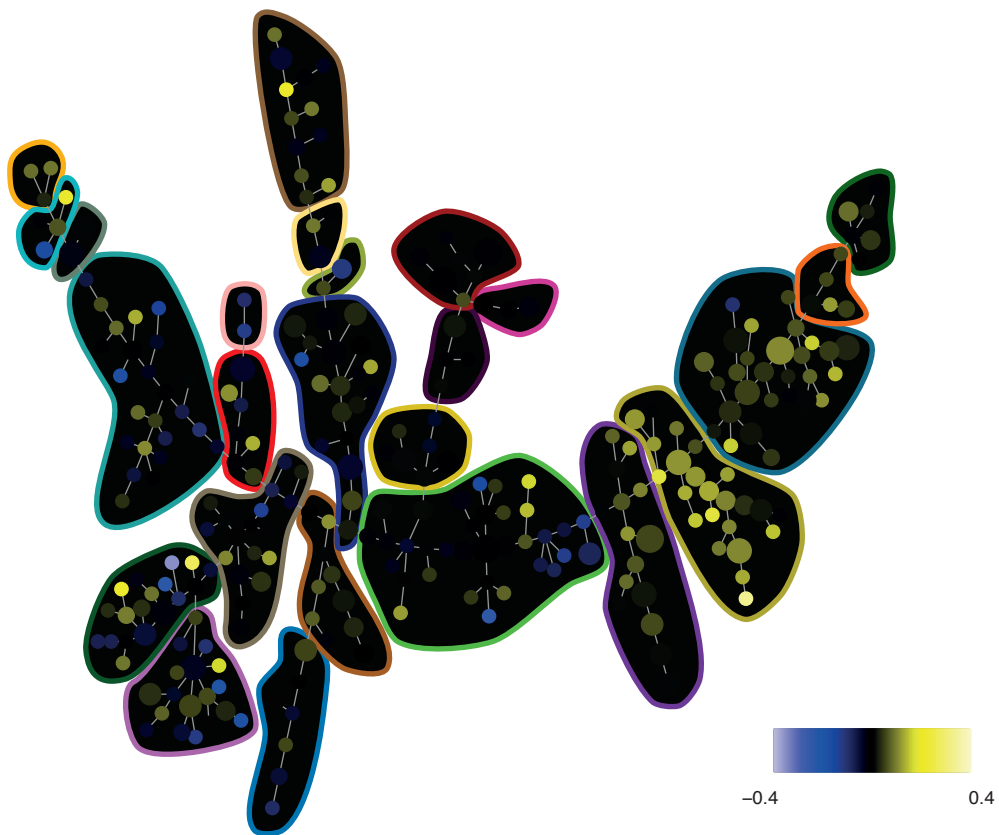



Figure S9A

175-pCrkL --- TNFa vs Ref Ratio

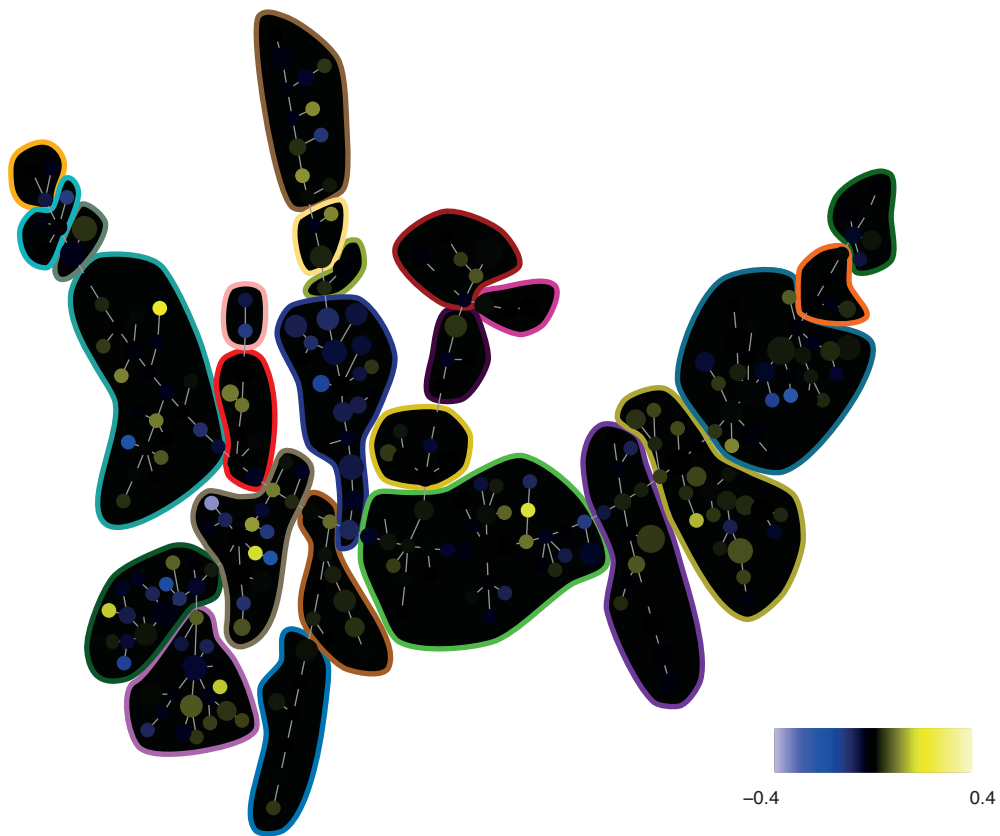

Figure S9A

175-pCrkL ---- TPO vs Ref Ratio

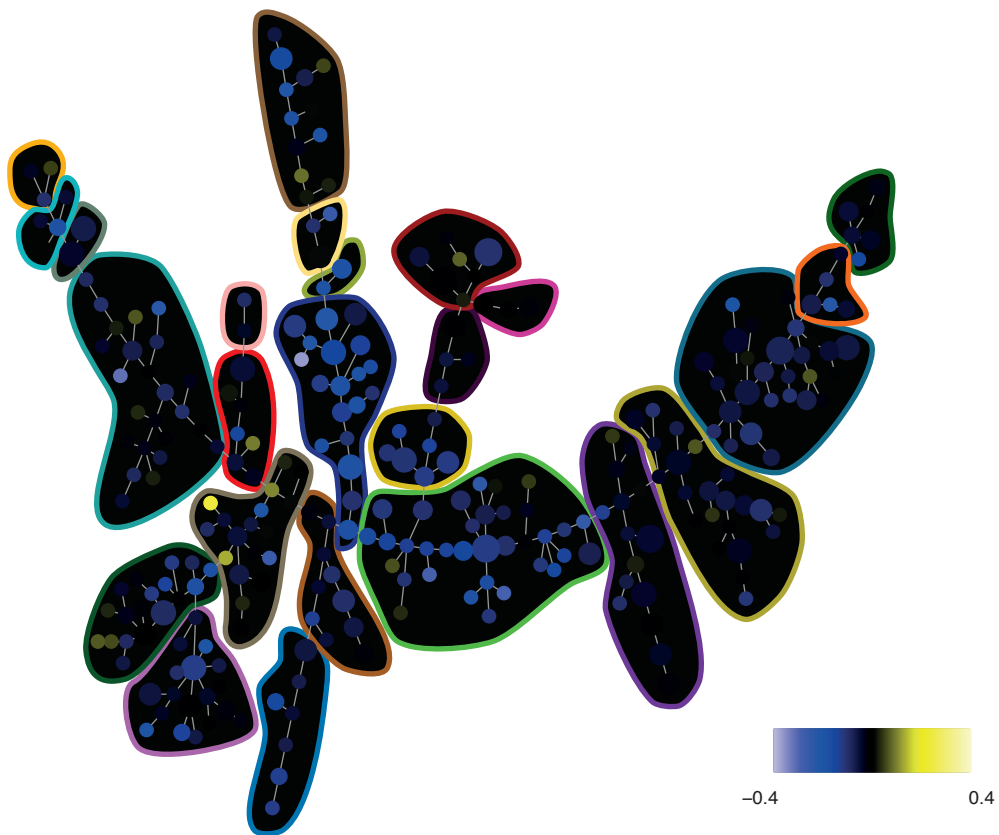

Figure S9A

176-pCREB --- BCR vs Ref Ratio

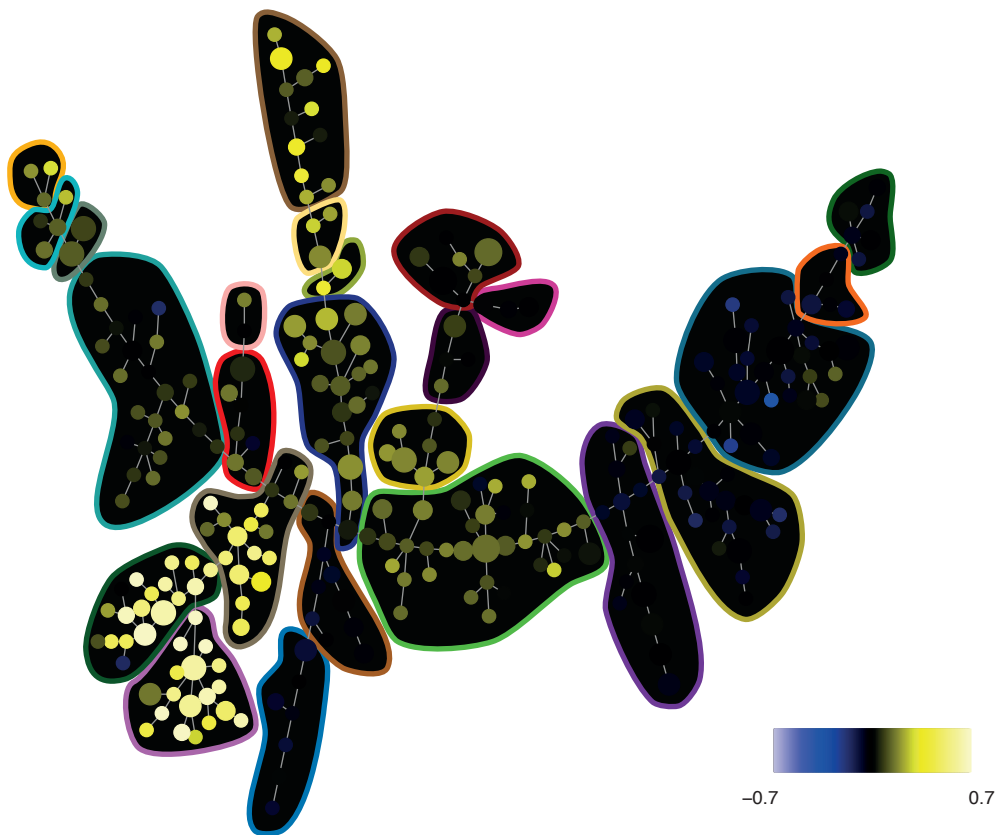

Figure S9A

176-pCREB --- DMSO vs Ref Ratio

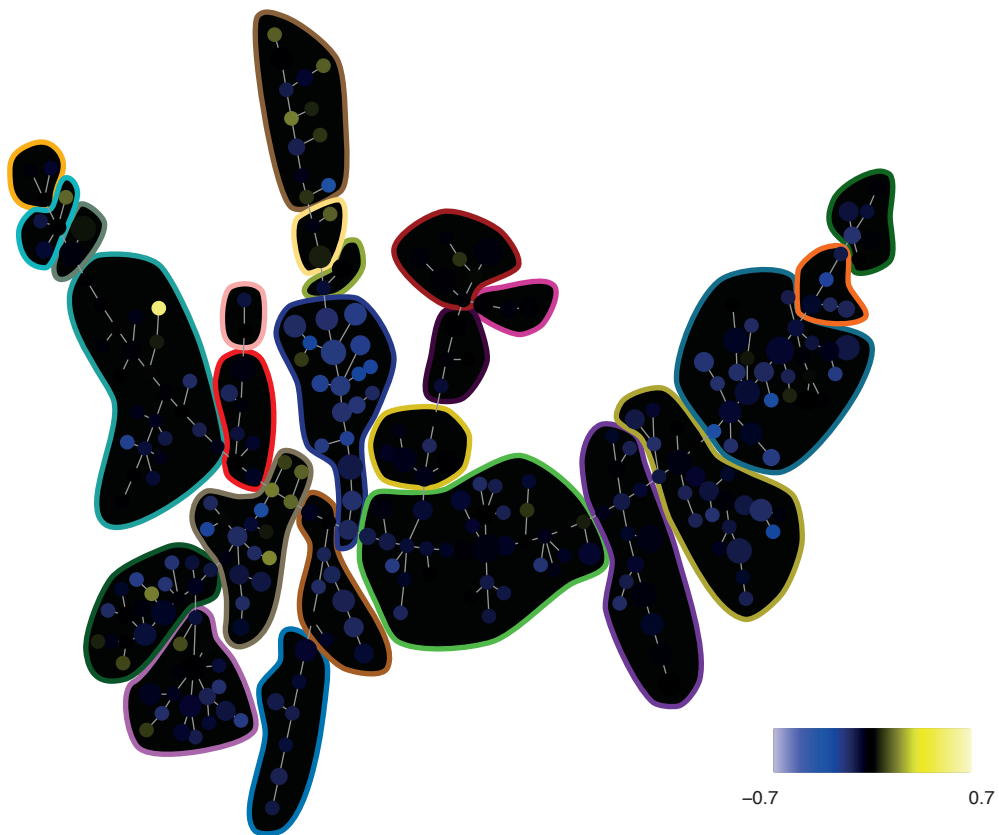

Figure S9A

176-pCREB --- Flt3L vs Ref Ratio

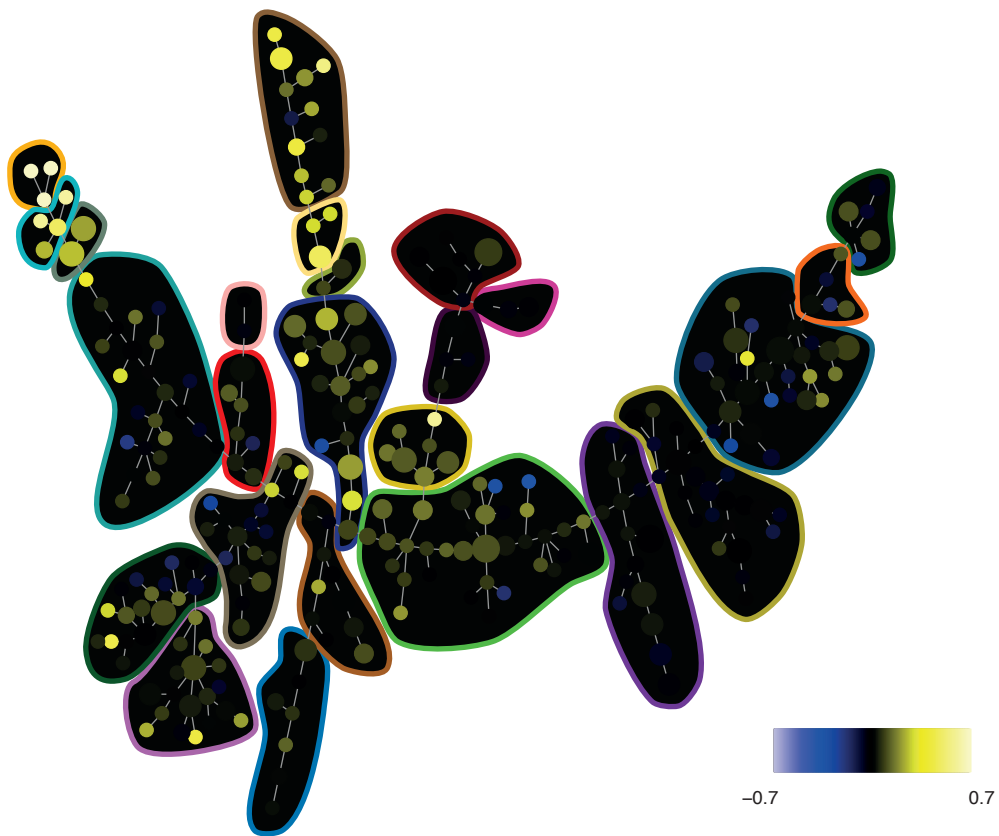

Figure S9A

176-pCREB ---- GCSF vs Ref Ratio

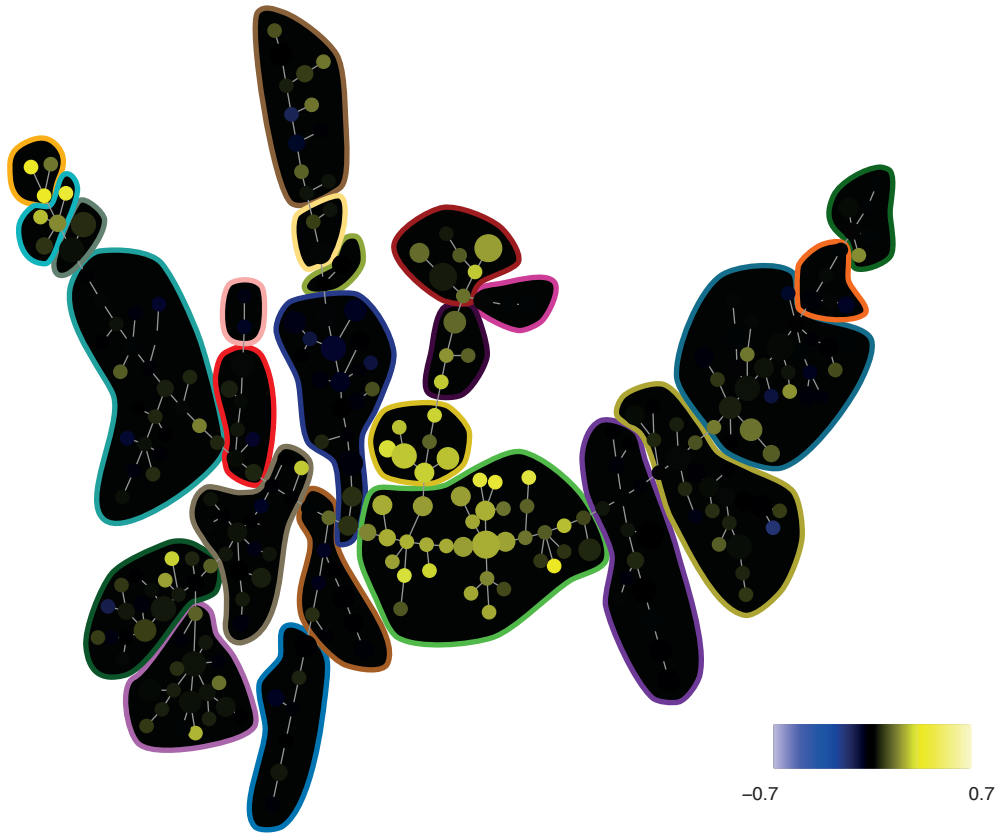

Figure S9A

176-pCREB ---- GMCSF vs Ref Ratio

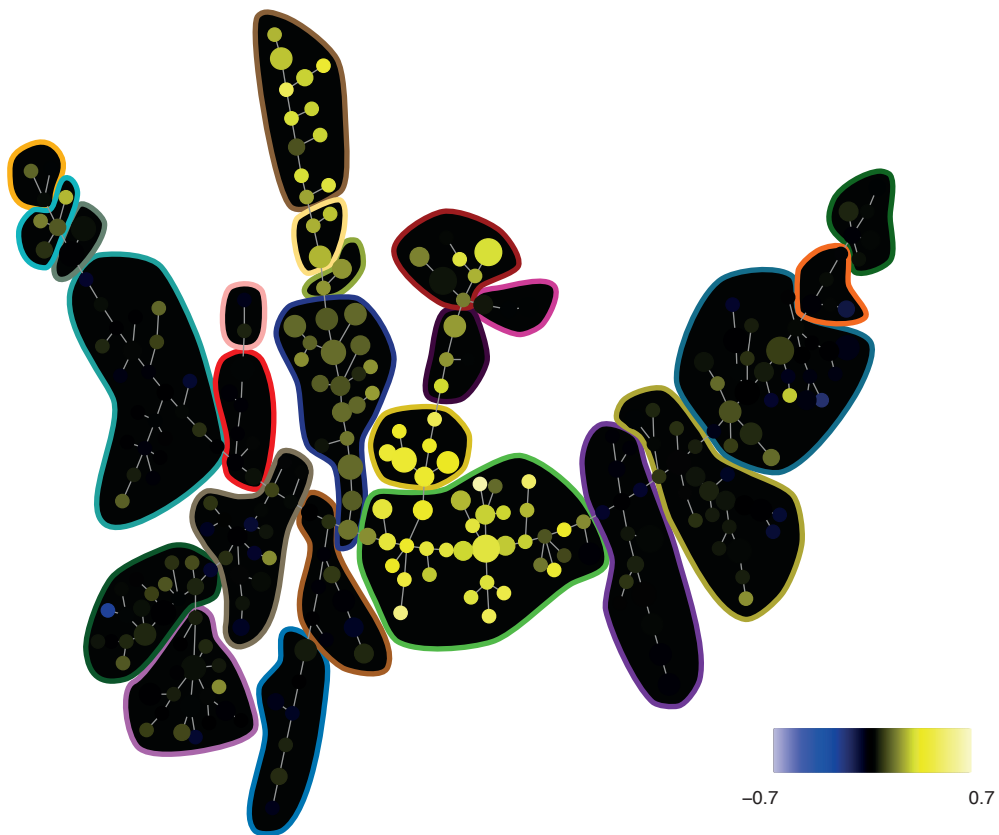

Figure S9A

176-pCREB ---- IFNad vs Ref Ratio

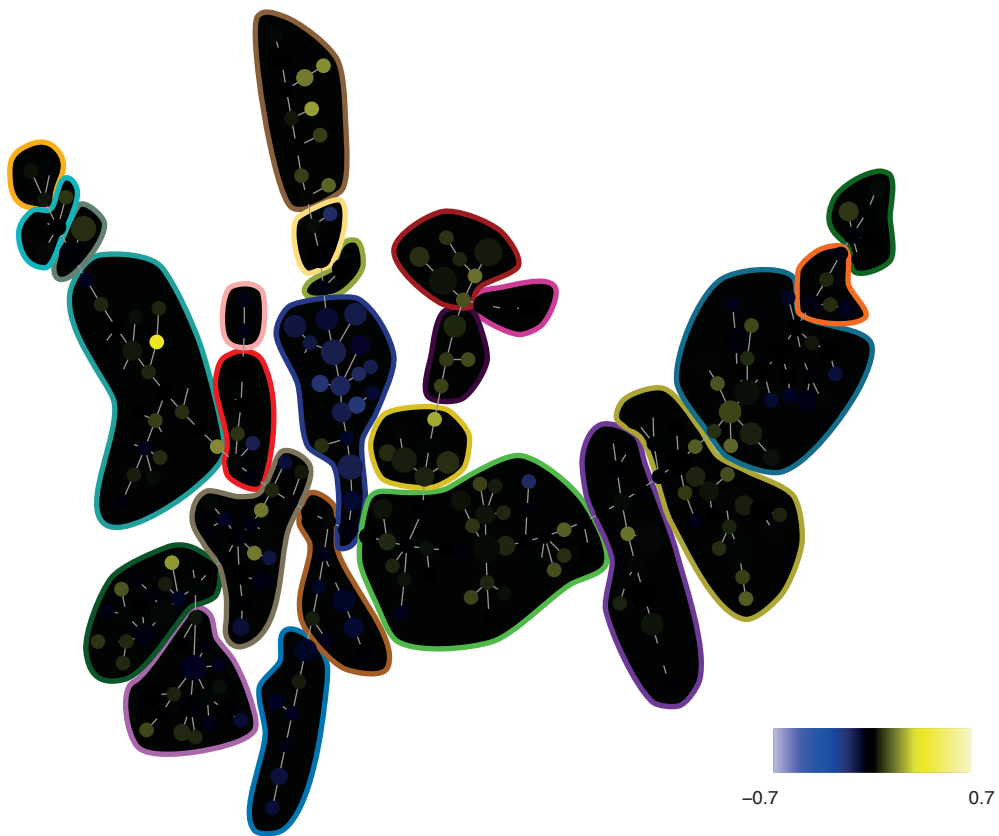



Figure S9A

176-pCREB — IL3 vs Ref Ratio

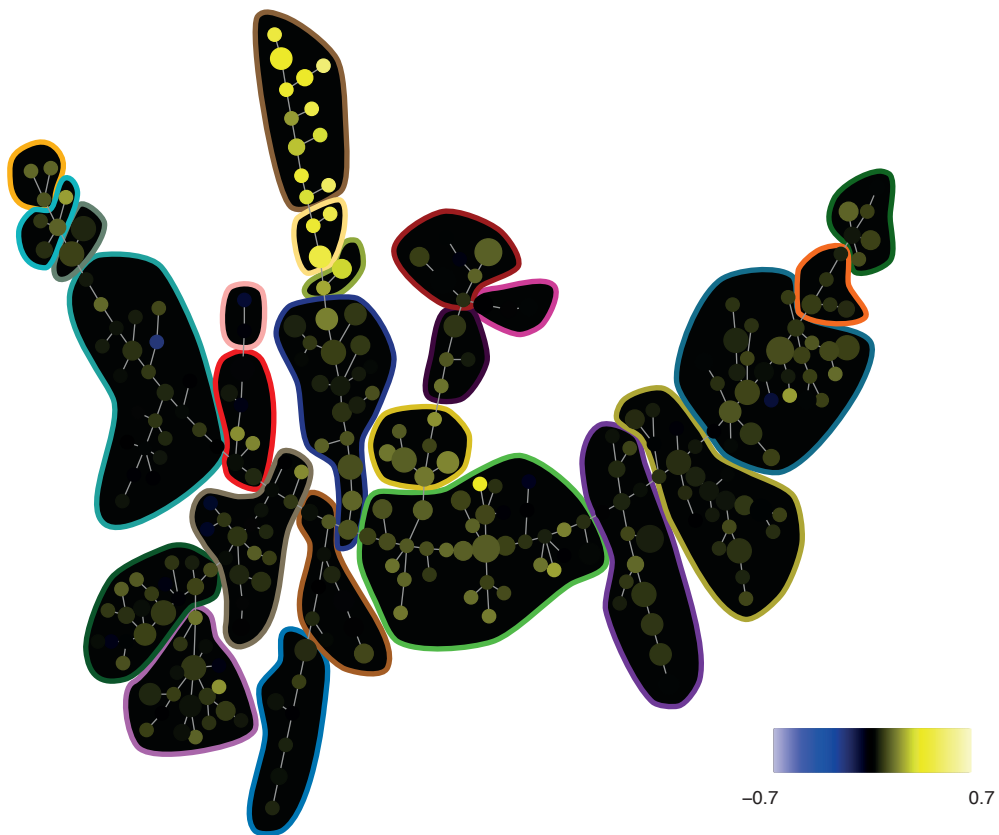

Figure S9A

176-pCREB — IL7 vs Ref Ratio

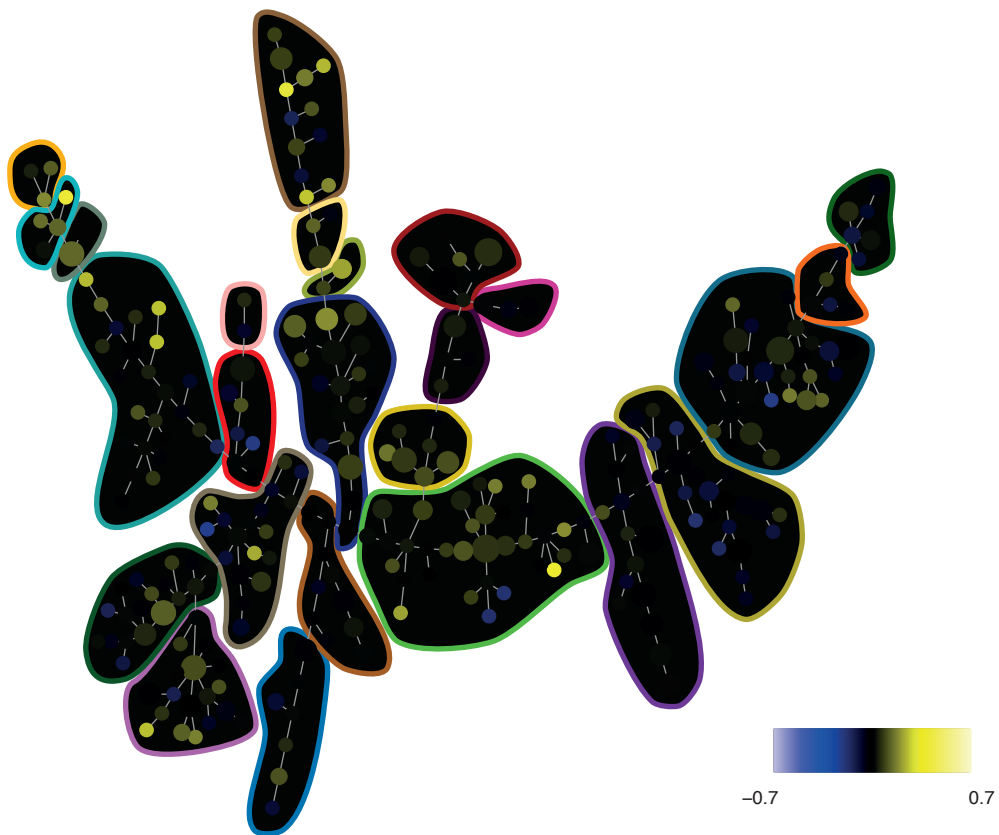

Figure S9A

176-pCREB ---- LPS vs Ref Ratio

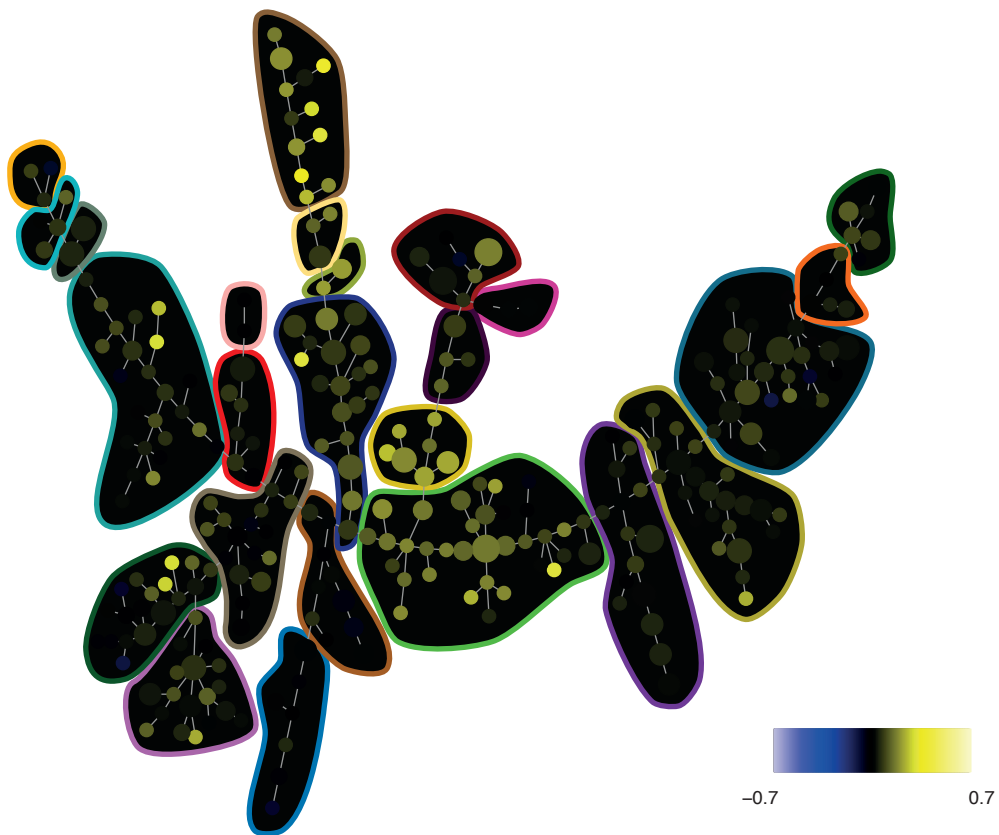

Figure S9A

176-pCREB ---- PMAiono vs Ref Ratio

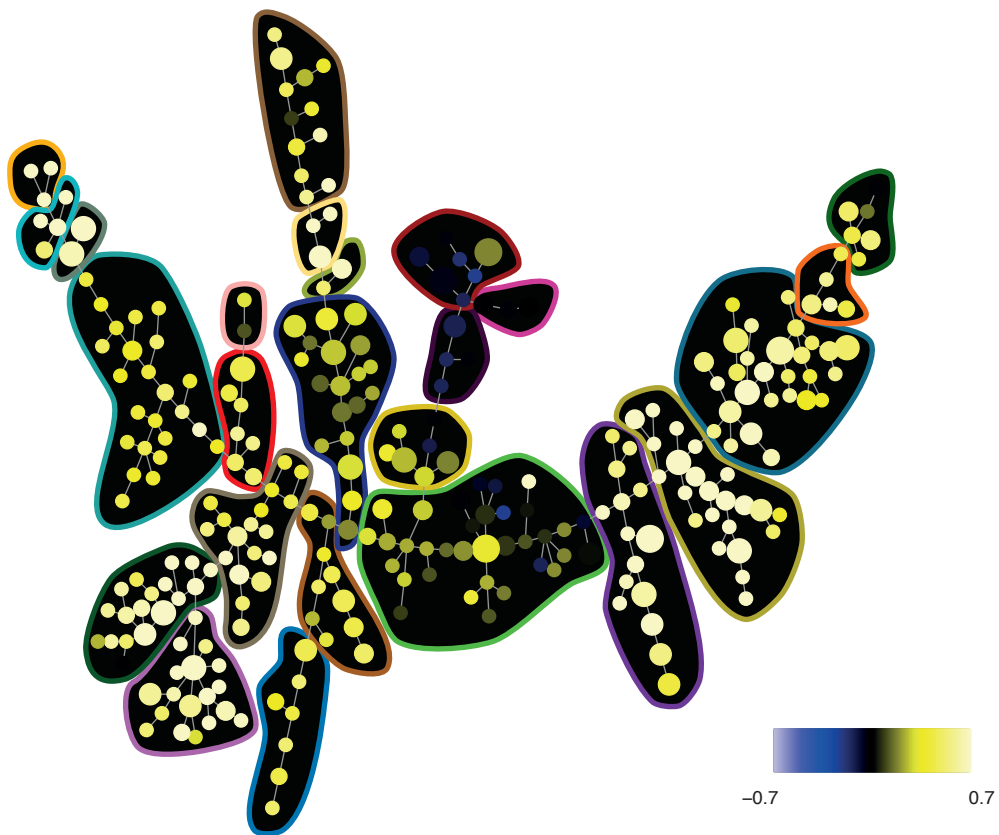

Figure S9A

176-pCREB ---- PVO4 vs Ref Ratio

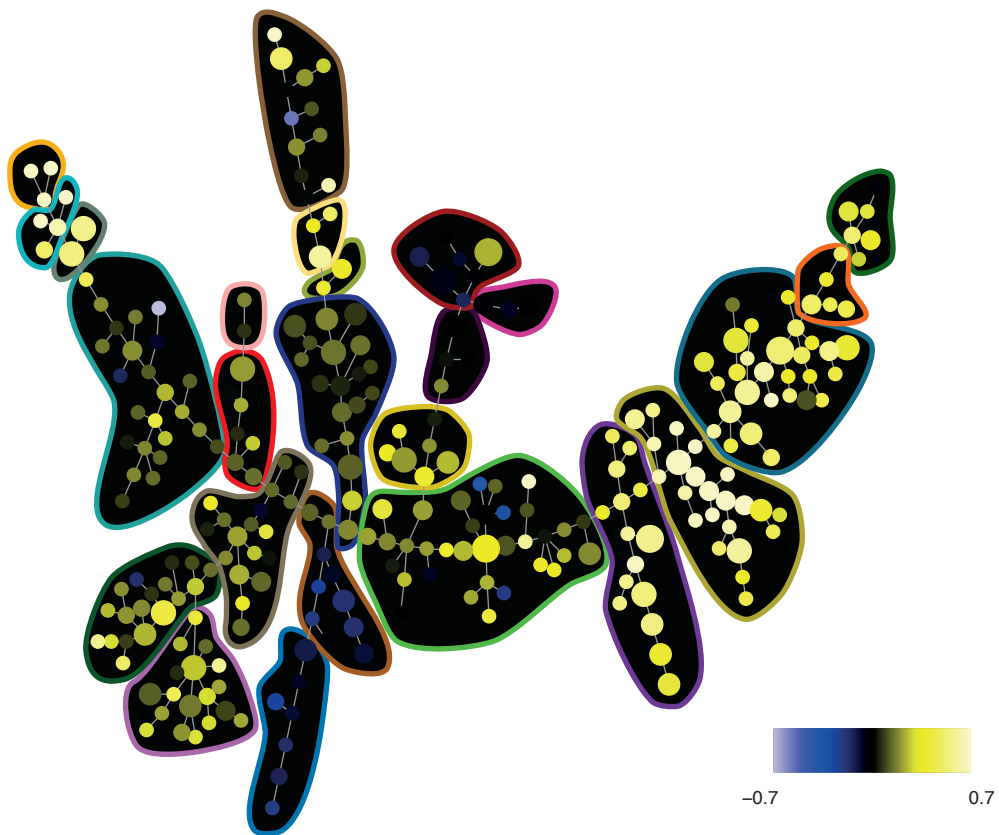

Figure S9A

176-pCREB ---- SCF vs Ref Ratio

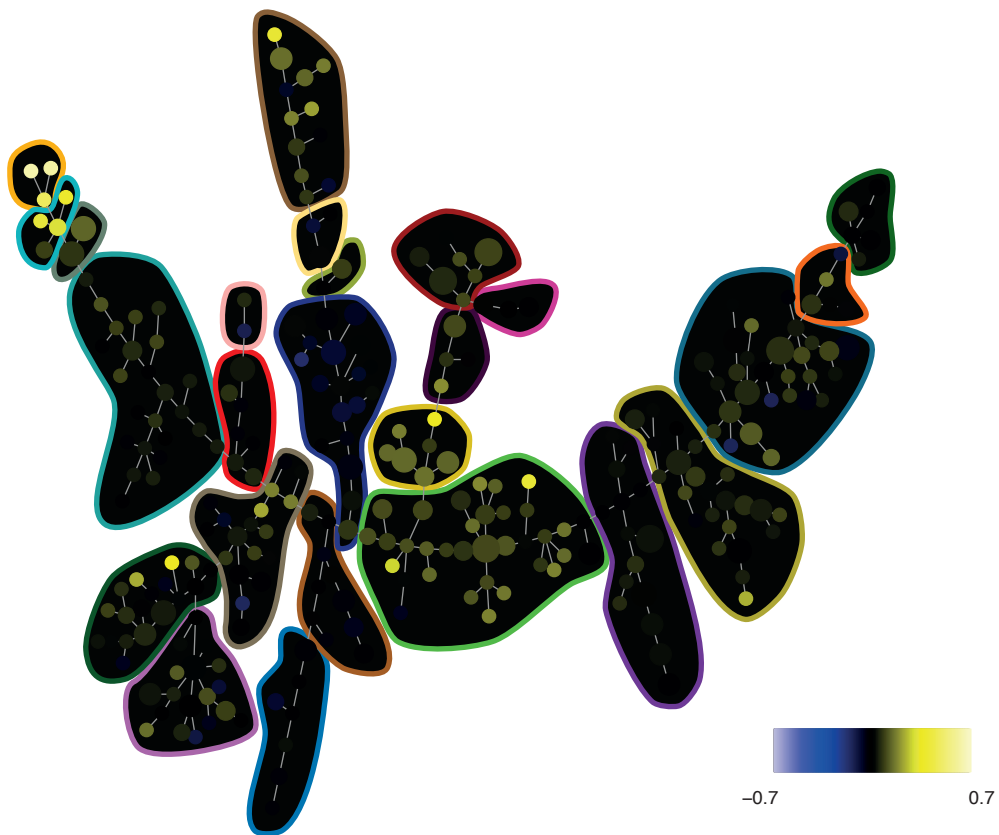

Figure S9A

176-pCREB ---- TNFa vs Ref Ratio

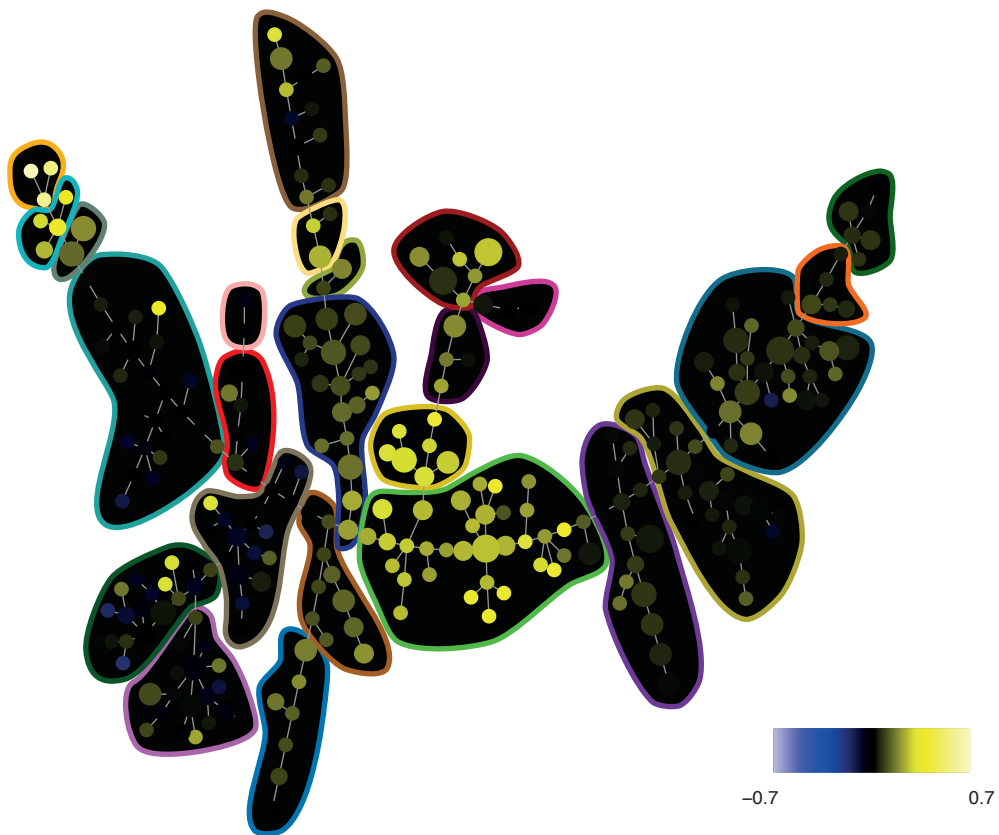

Figure S9A

176-pCREB --- TPO vs Ref Ratio

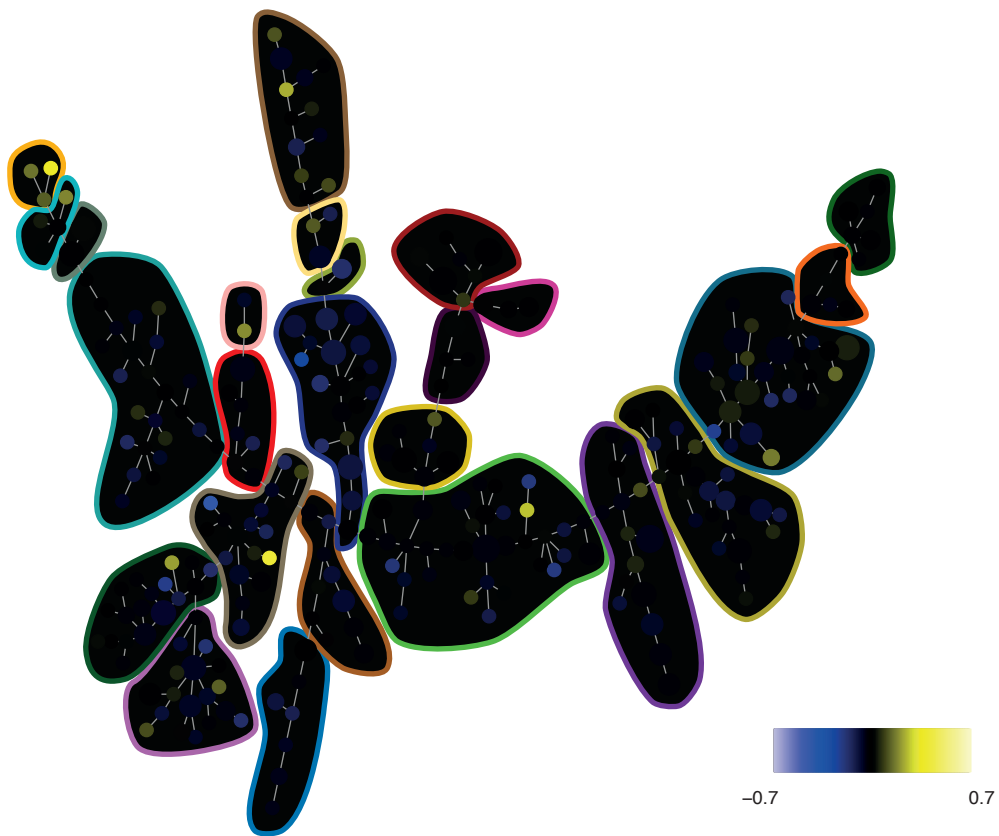



Figure S9B

141-pPLCgamma2 ——— Dasatinib+BCR vs Ref Ratio

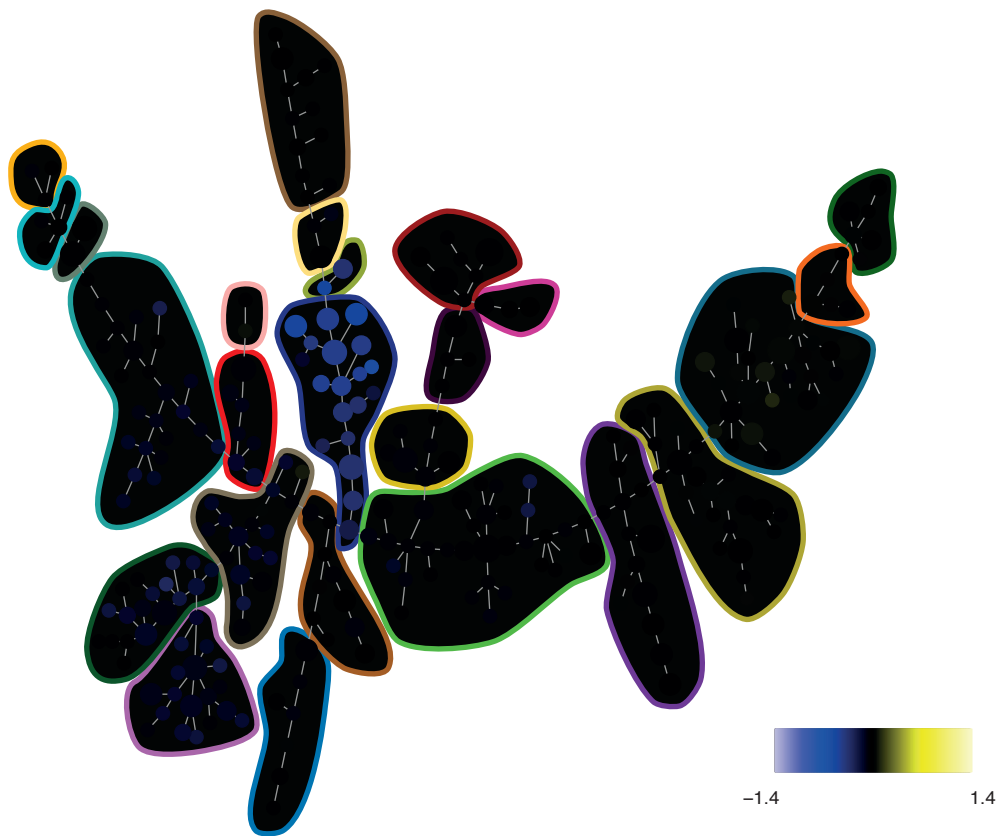

Figure S9B

141-pPLCgamma2 ---- Dasatinib+Flt3L vs Ref Ratio

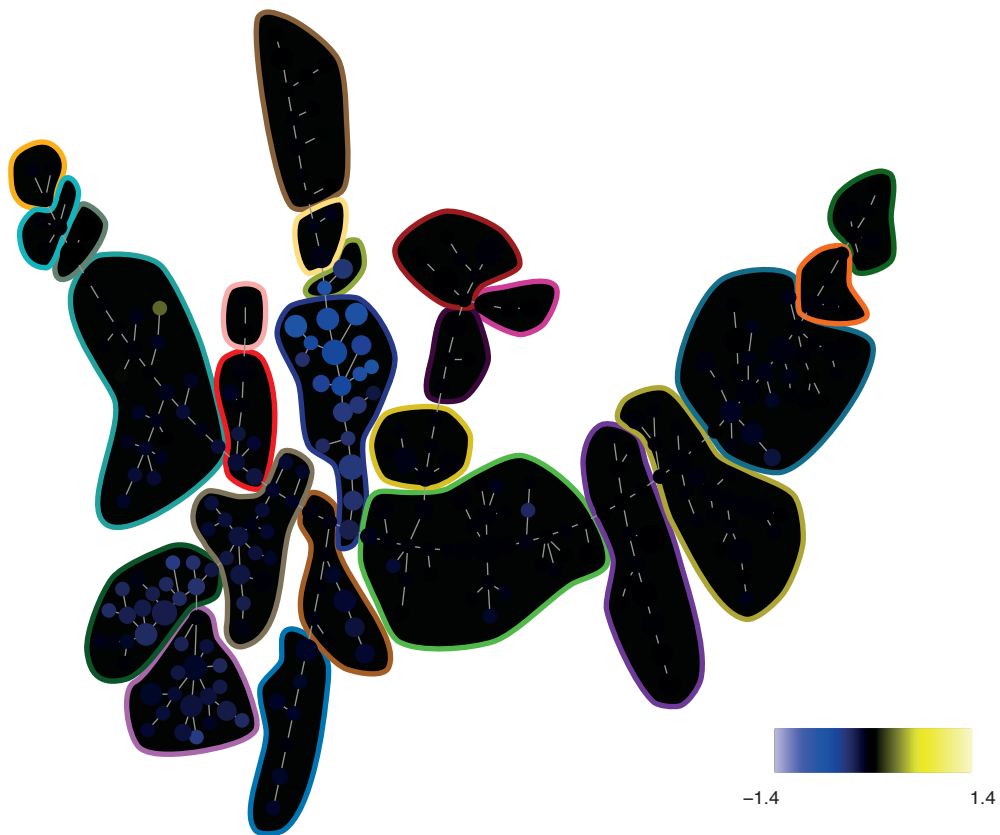

Figure S9B

141-pPLCgamma2 ---- Dasatinib+IL7 vs Ref Ratio

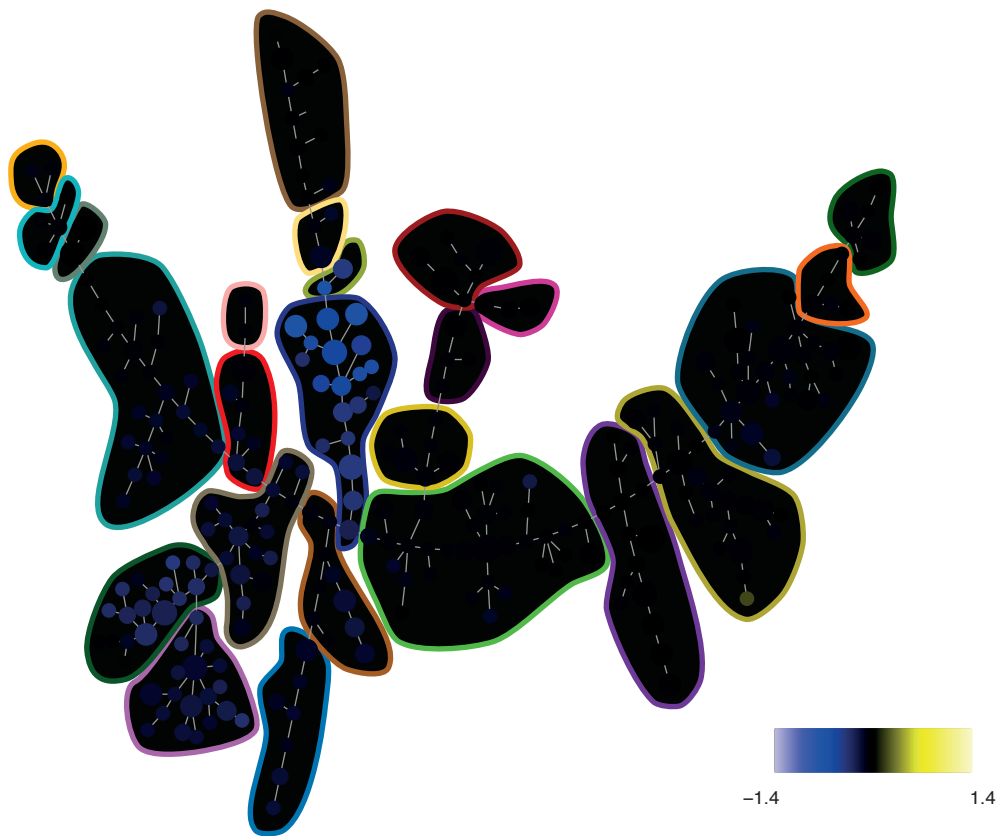

Figure S9B

141-pPLCgamma2 --- Dasatinib+PMAiono vs Ref Ratio

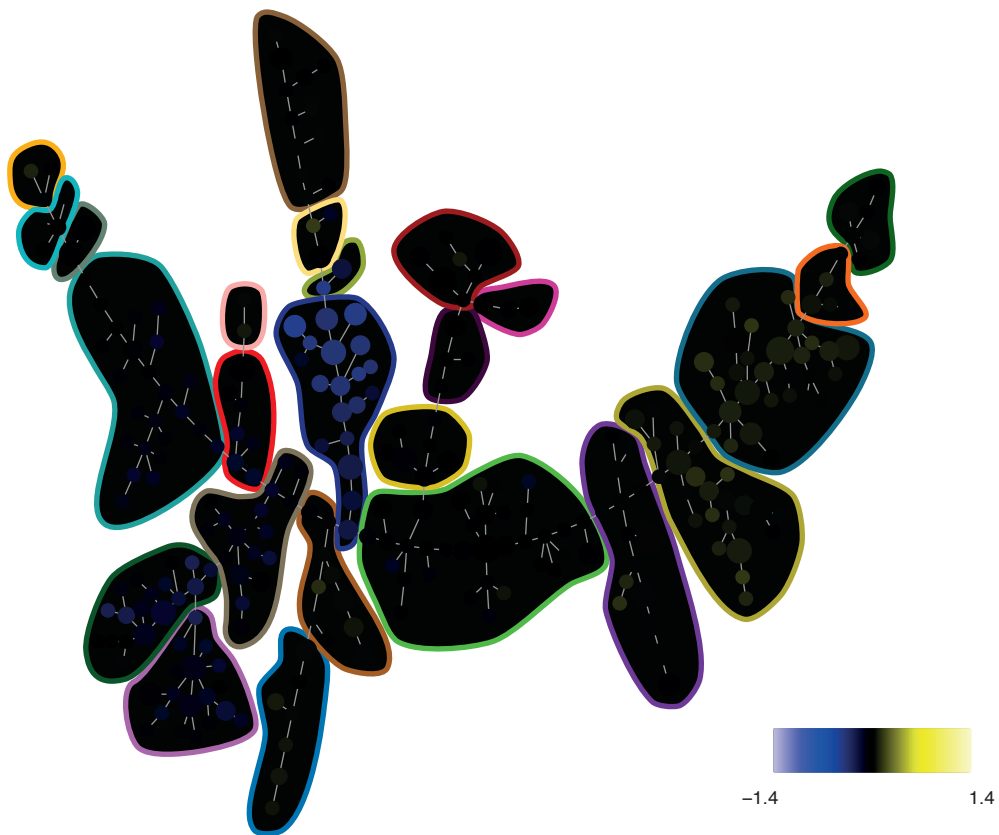

Figure S9B

141-pPLCgamma2 ---- Dasatinib+PVO4 vs Ref Ratio

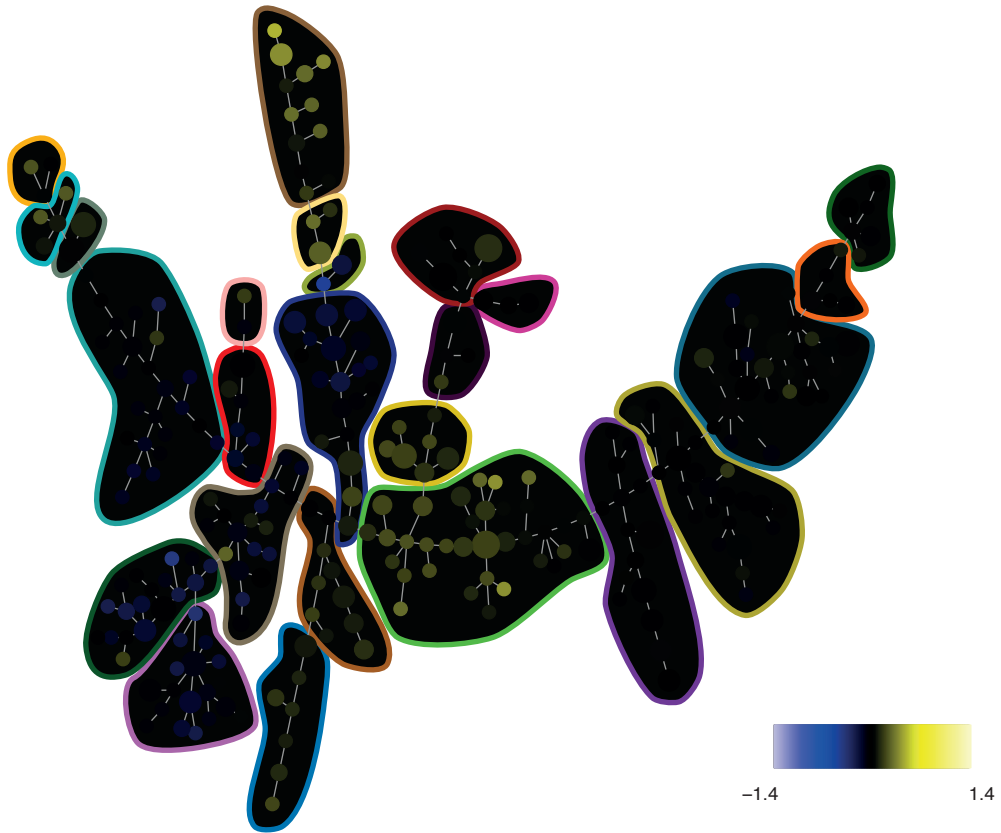

Figure S9B

141-pPLCgamma2 ---- Dasatinib+Unstim vs Ref Ratio

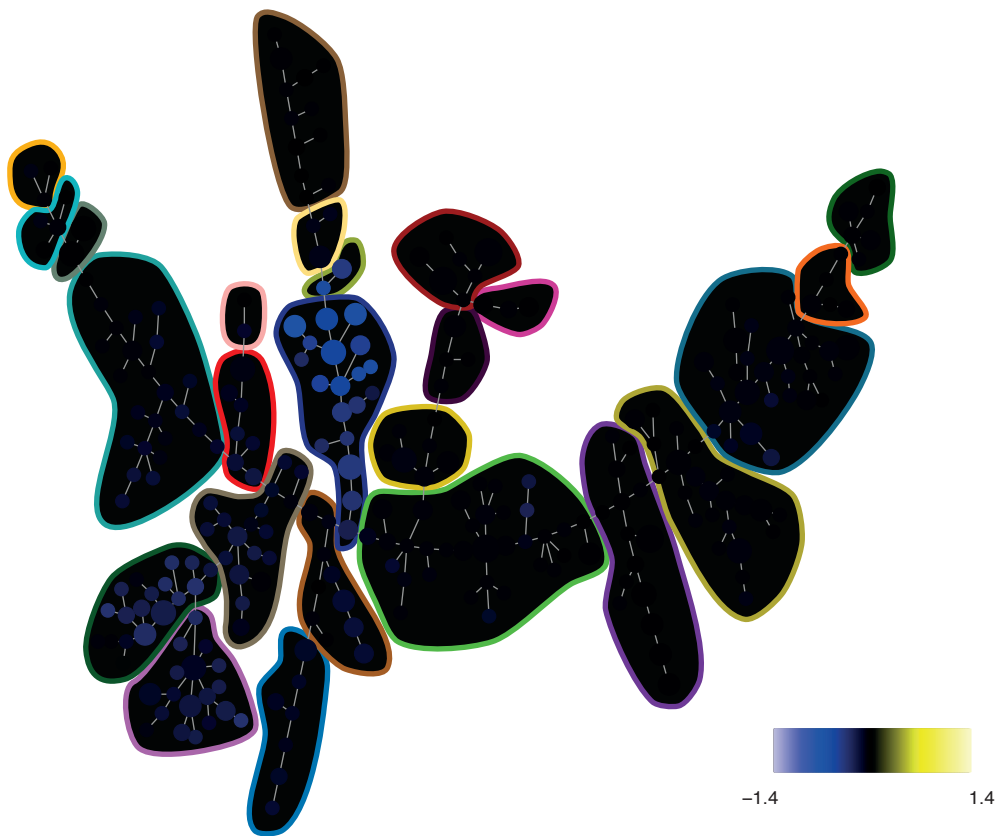

Figure S9B

150-pSTAT5 ---- Dasatinib+BCR vs Ref Ratio

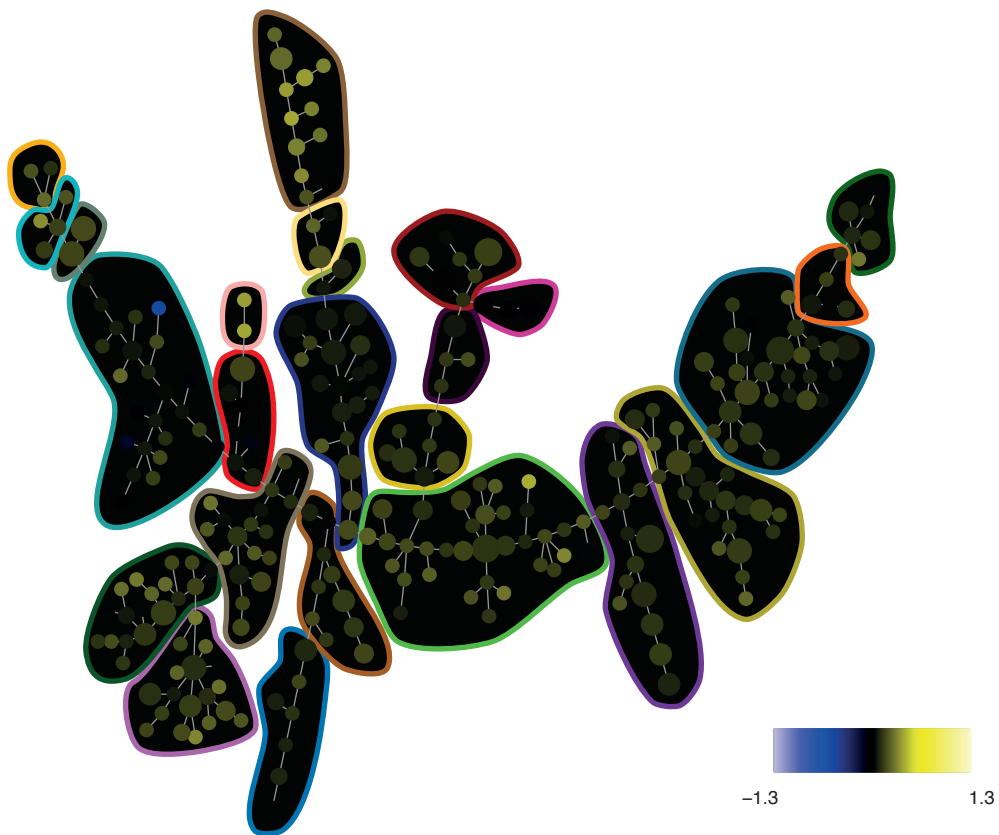

Figure S9B

150-pSTAT5 ---- Dasatinib+Flt3L vs Ref Ratio

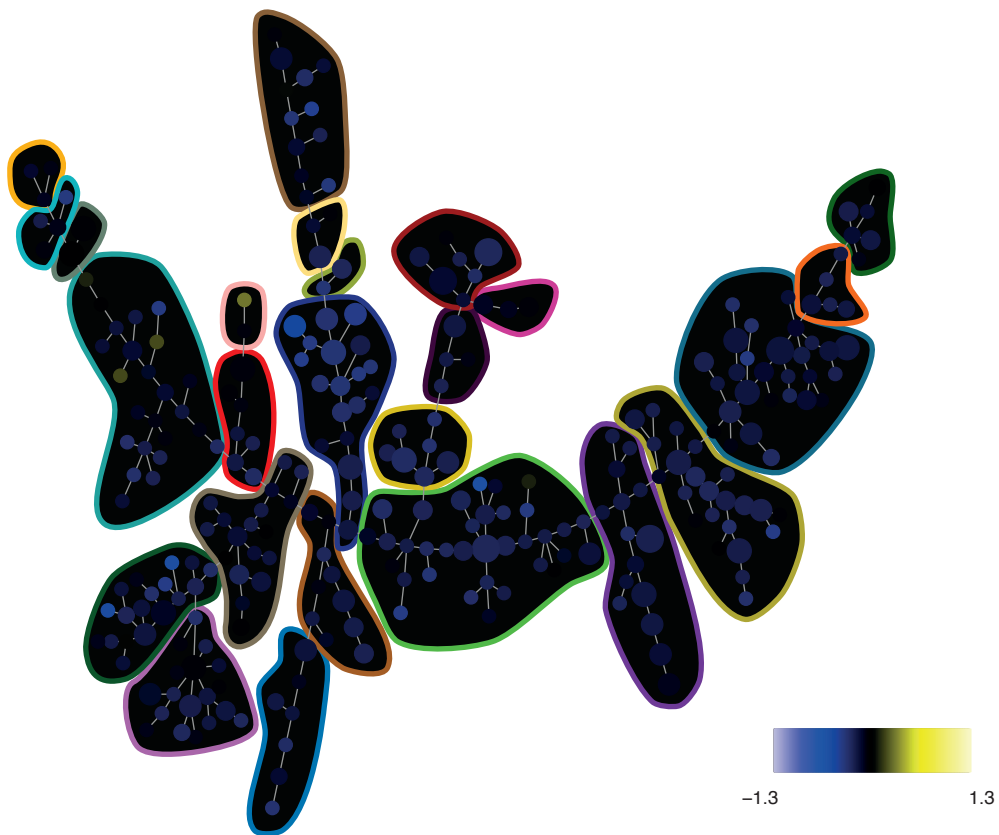



Figure S9B

150-pSTAT5 ---- Dasatinib+IL7 vs Ref Ratio

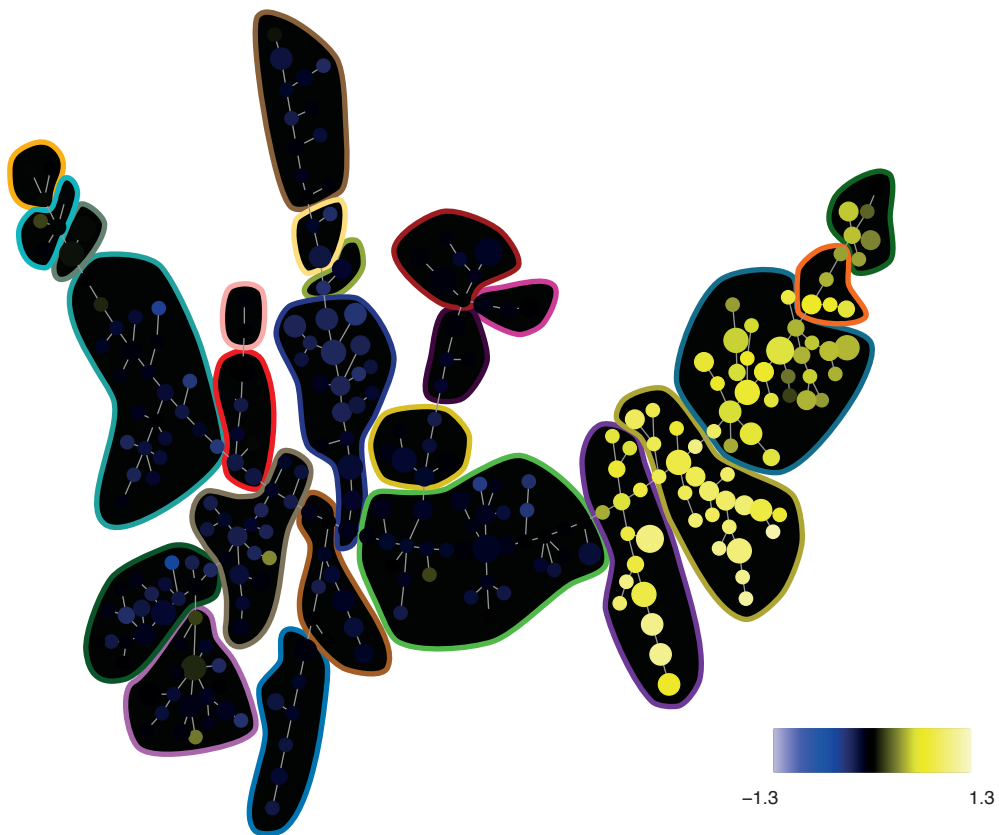

Figure S9B

150-pSTAT5 --- Dasatinib+PMAiono vs Ref Ratio

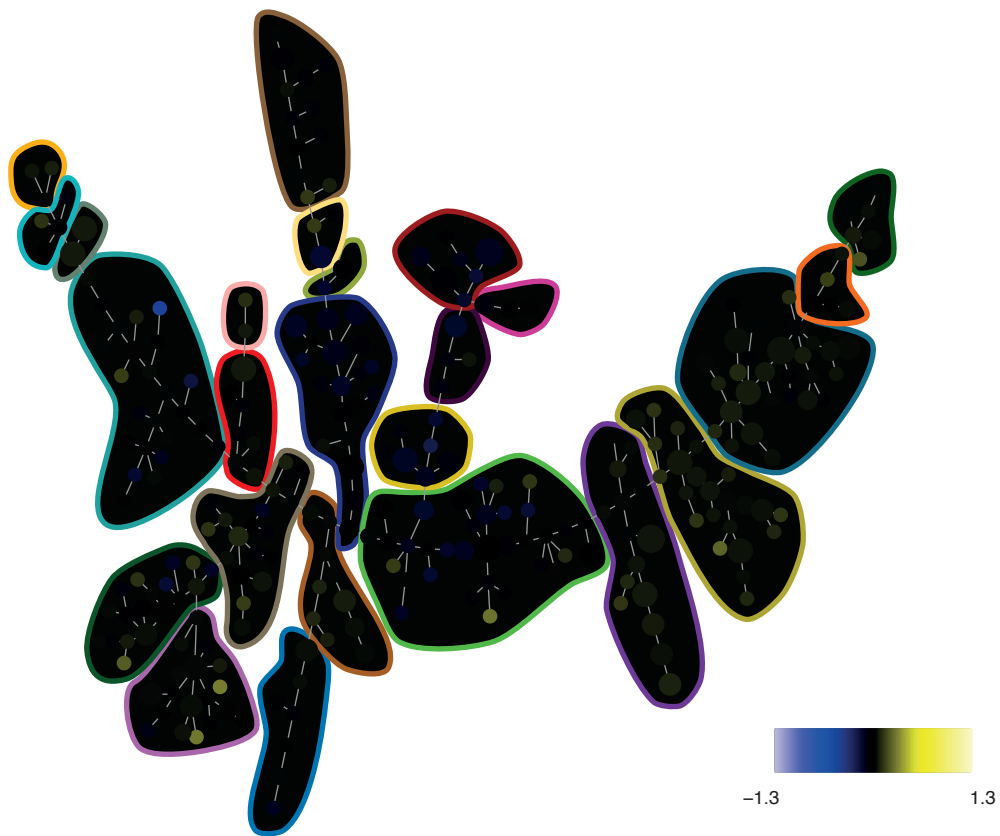

Figure S9B

150-pSTAT5 ---- Dasatinib+PVO4 vs Ref Ratio

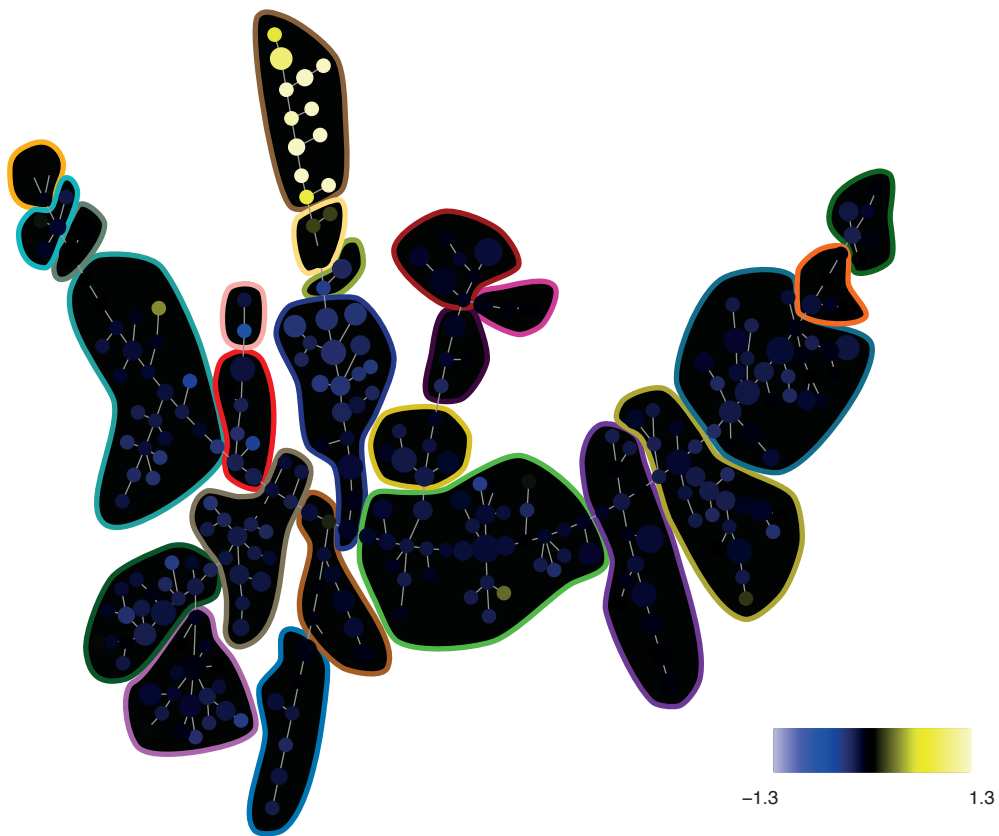

Figure S9B

150-pSTAT5 ---- Dasatinib+Unstim vs Ref Ratio

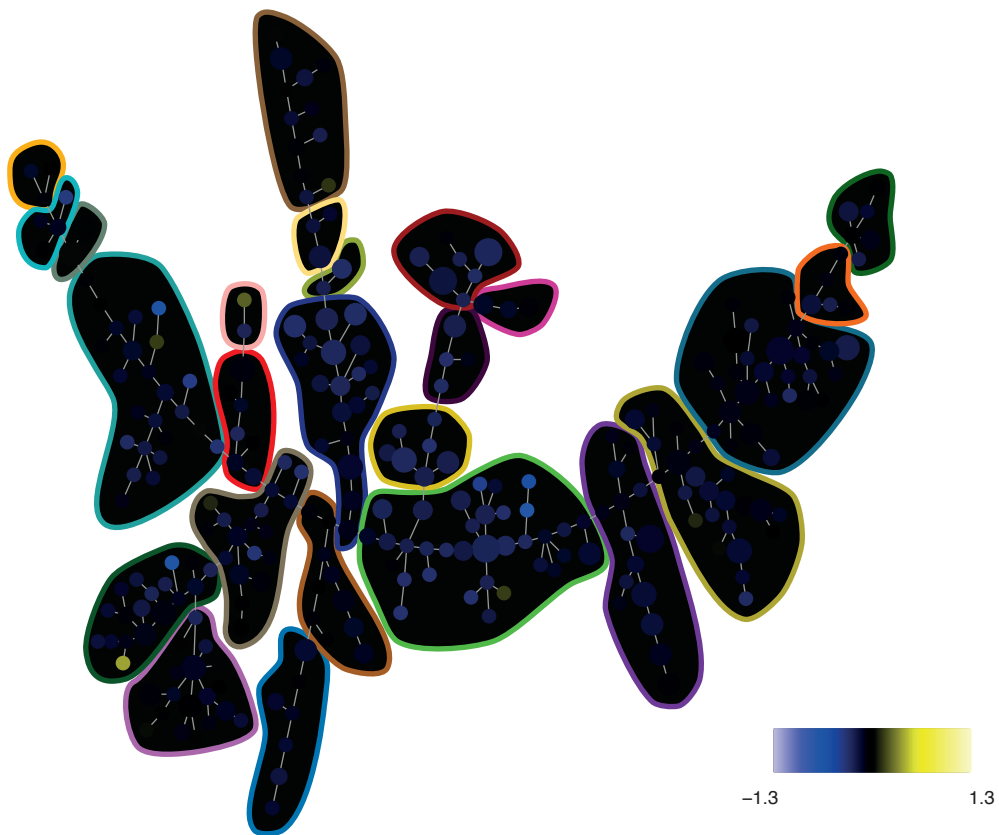

Figure S9B

151-pERK1/2 ---- Dasatinib+BCR vs Ref Ratio

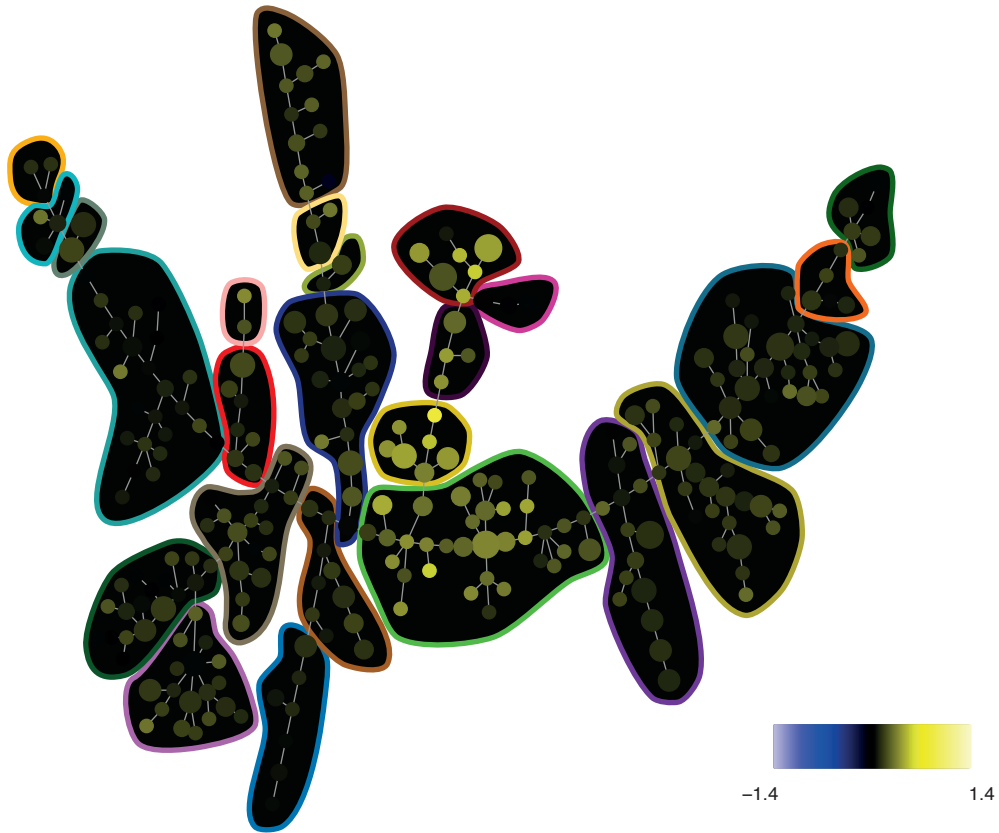

Figure S9B

151-pERK1/2 ---- Dasatinib+Flt3L vs Ref Ratio

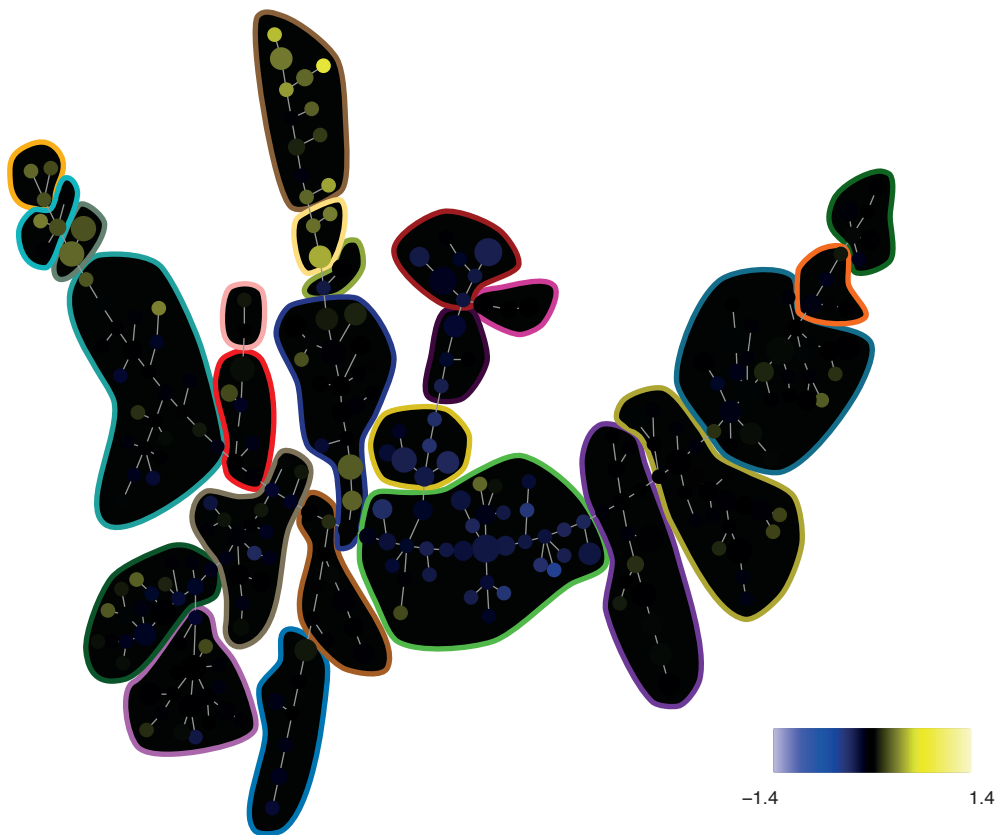

Figure S9B

151-pERK1/2 ---- Dasatinib+IL7 vs Ref Ratio

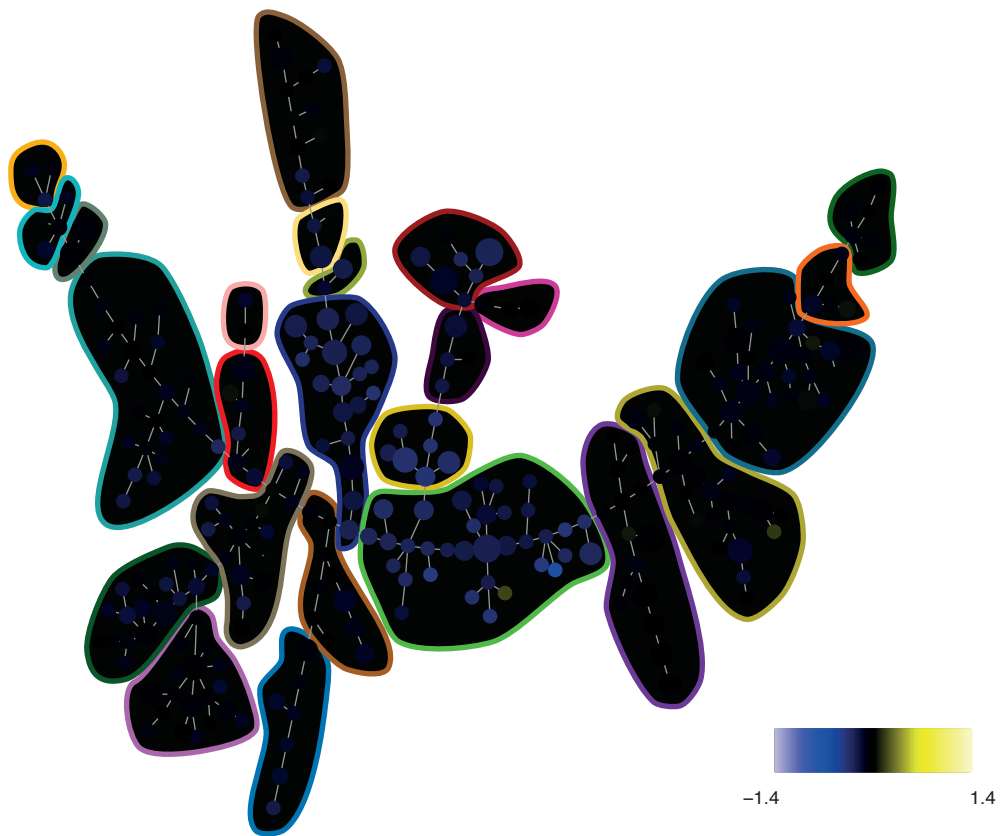

Figure S9B

151-pERK1/2 --- Dasatinib+PMAiono vs Ref Ratio

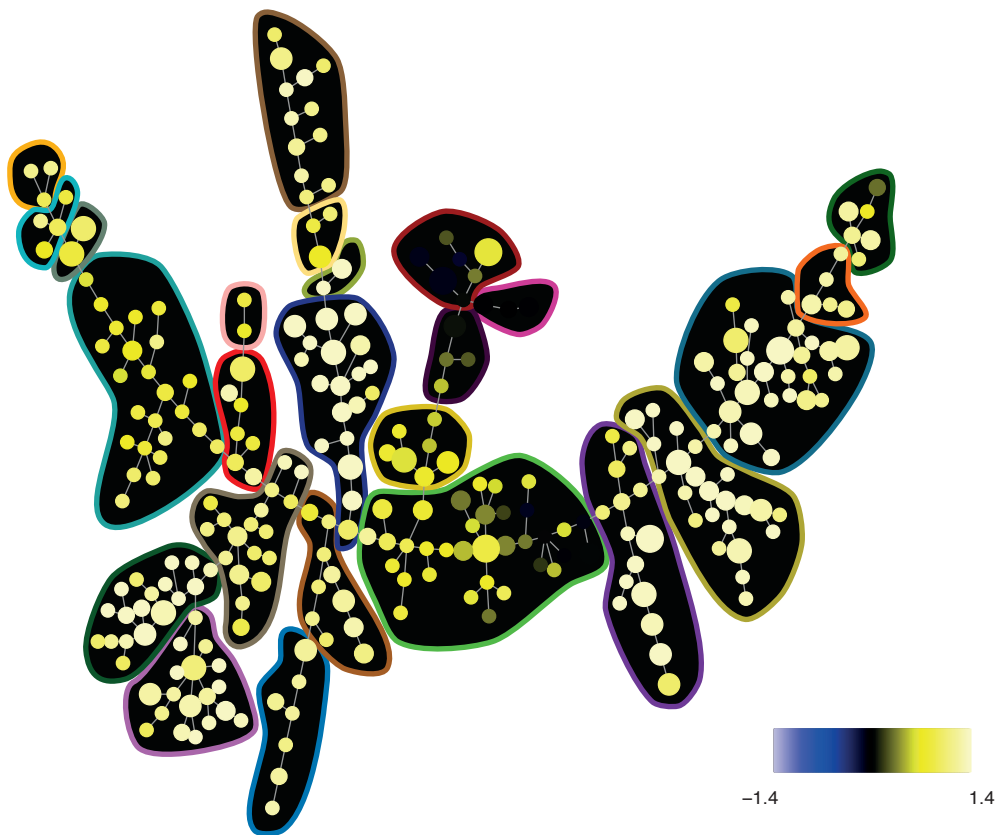



Figure S9B

151-pERK1/2 ---- Dasatinib+PVO4 vs Ref Ratio

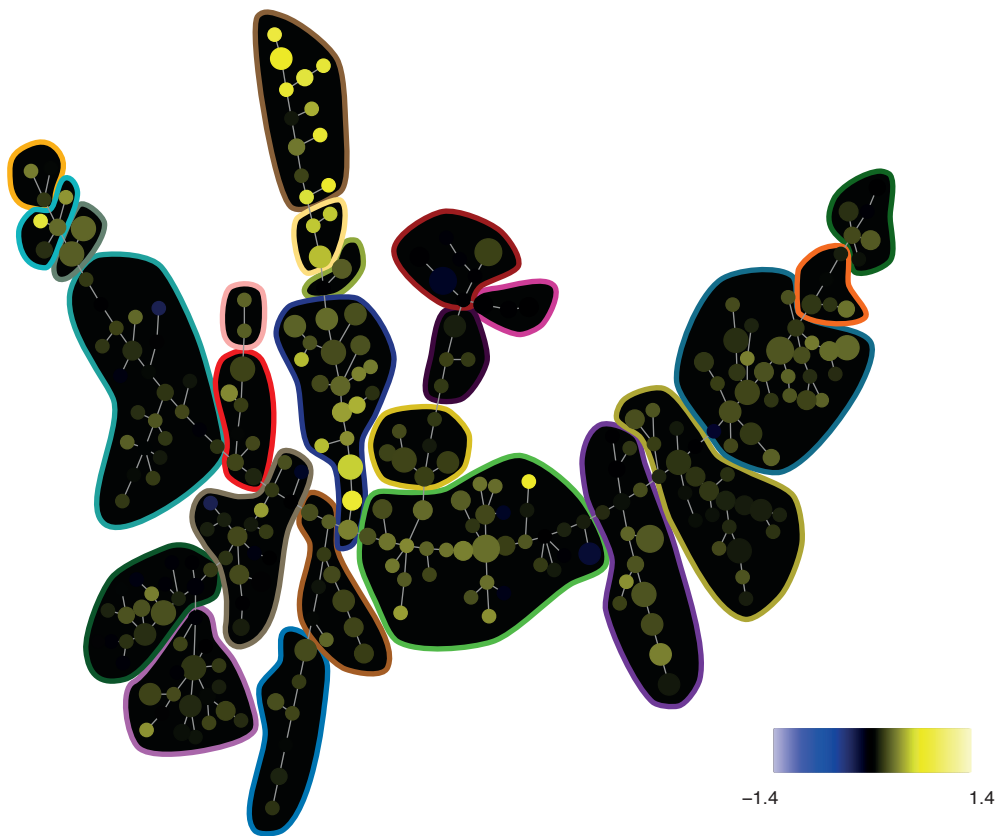

Figure S9B

151-pERK1/2 ---- Dasatinib+Unstim vs Ref Ratio

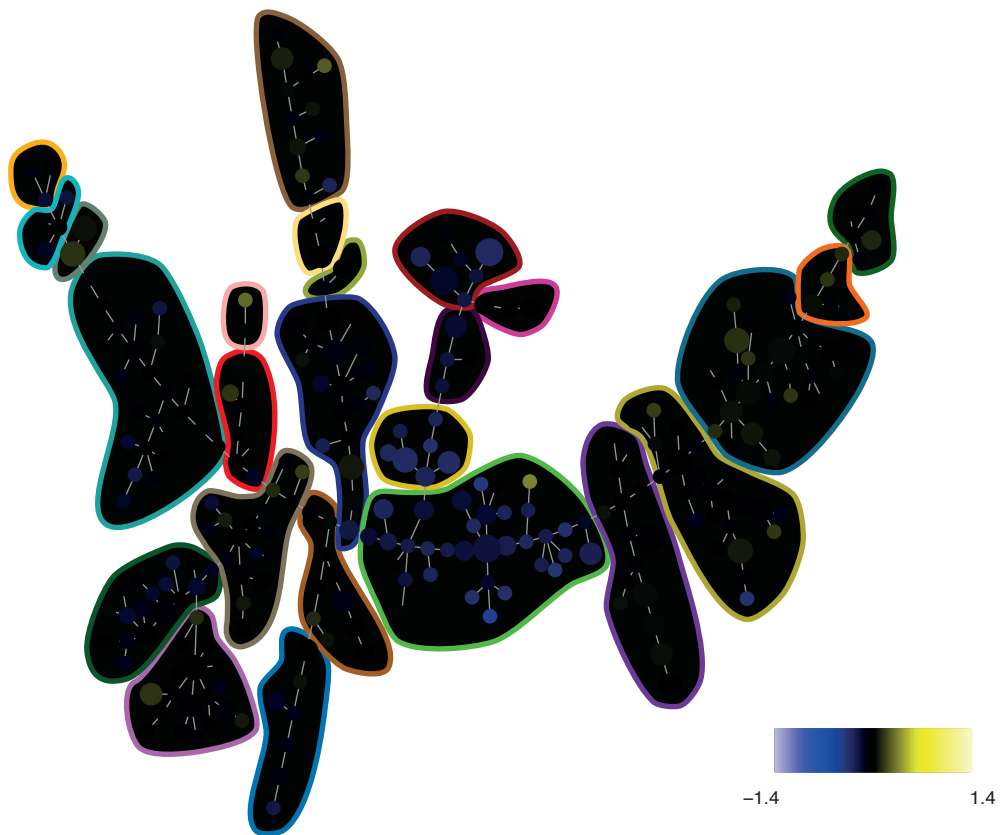

Figure S9B

152-Ki67 --- Dasatinib+BCR vs Ref Ratio

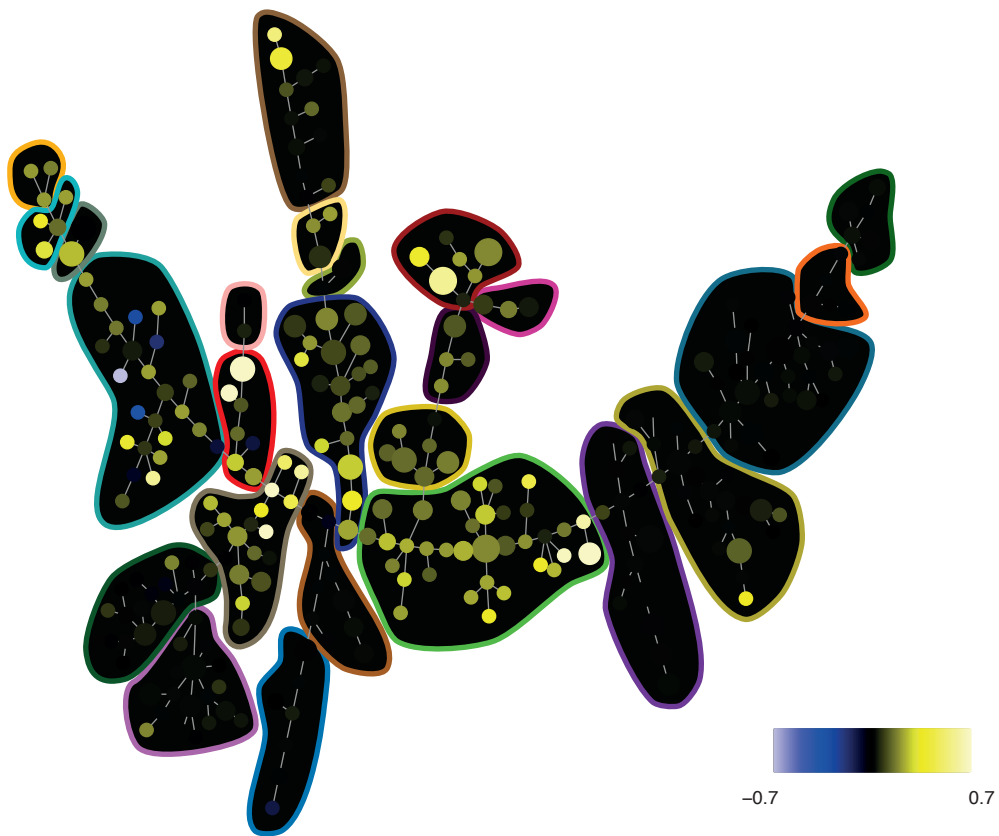

Figure S9B

152-Ki67 --- Dasatinib+Flt3L vs Ref Ratio

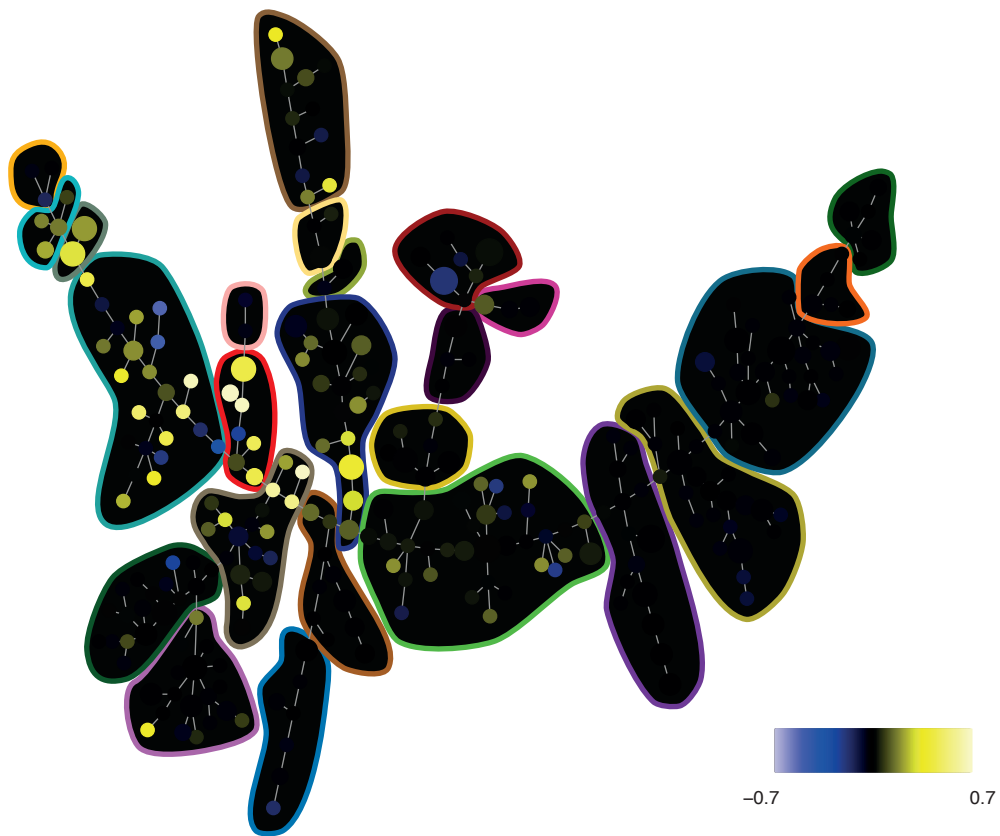

Figure S9B

152-Ki67 ---- Dasatinib+IL7 vs Ref Ratio

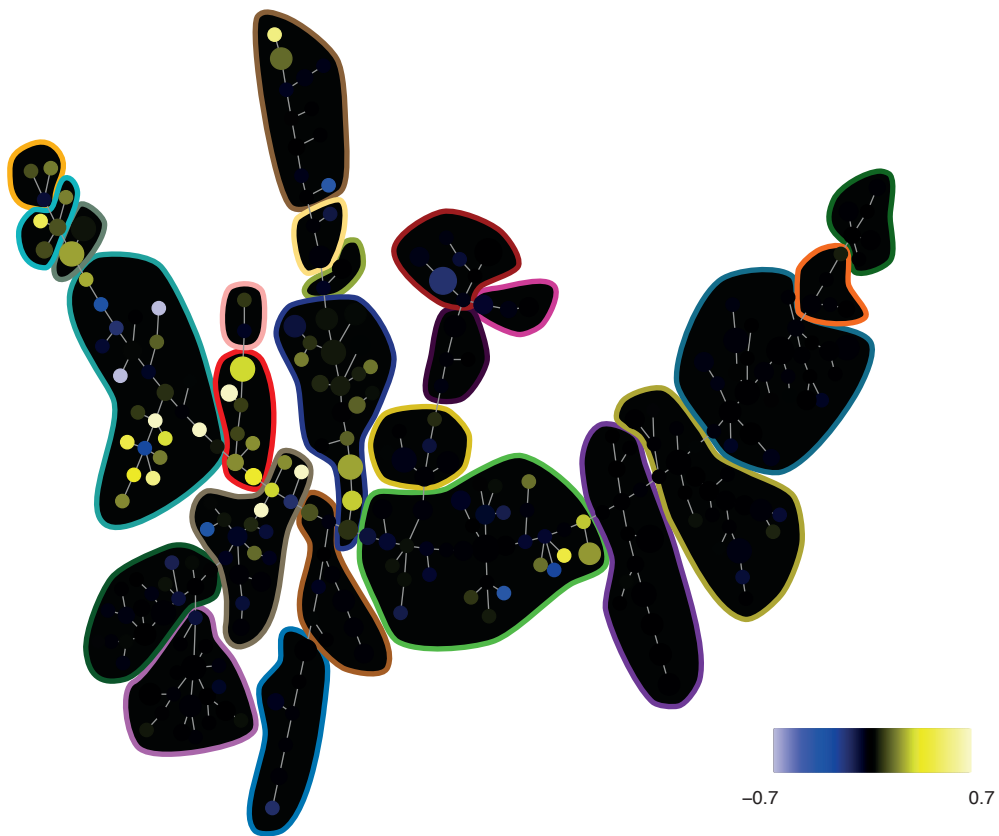

Figure S9B

152-Ki67 ---- Dasatinib+PMAiono vs Ref Ratio

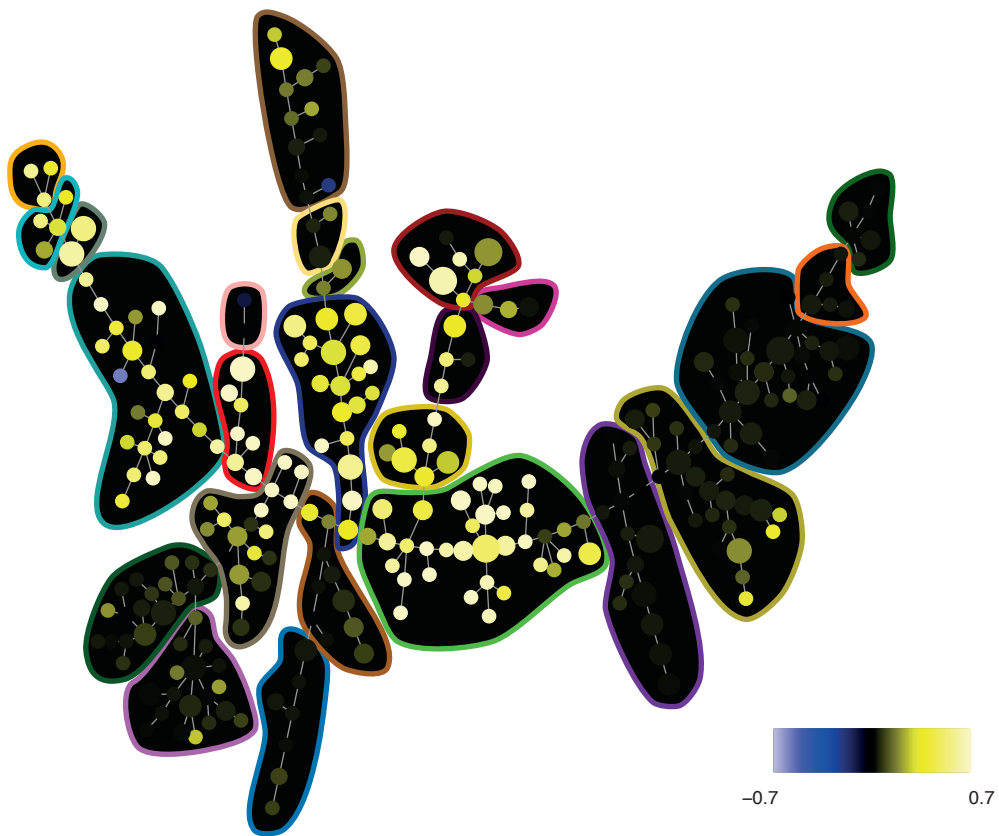

Figure S9B

152-Ki67 ---- Dasatinib+PVO4 vs Ref Ratio

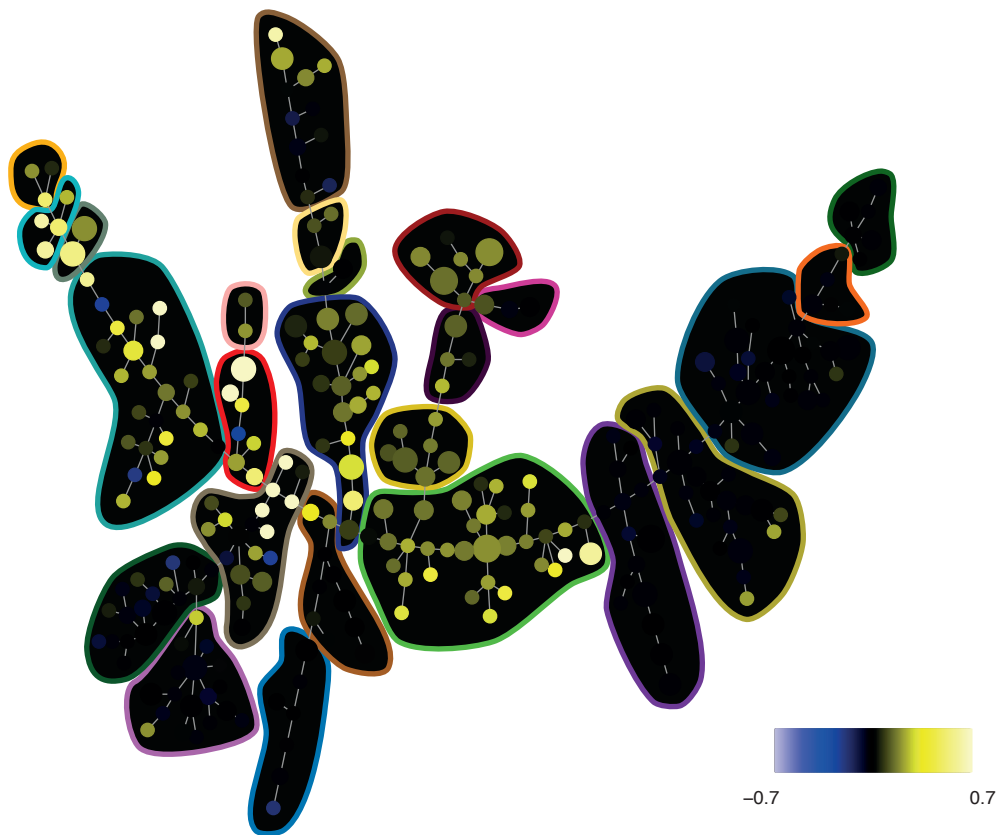

Figure S9B

152-Ki67 ---- Dasatinib+Unstim vs Ref Ratio

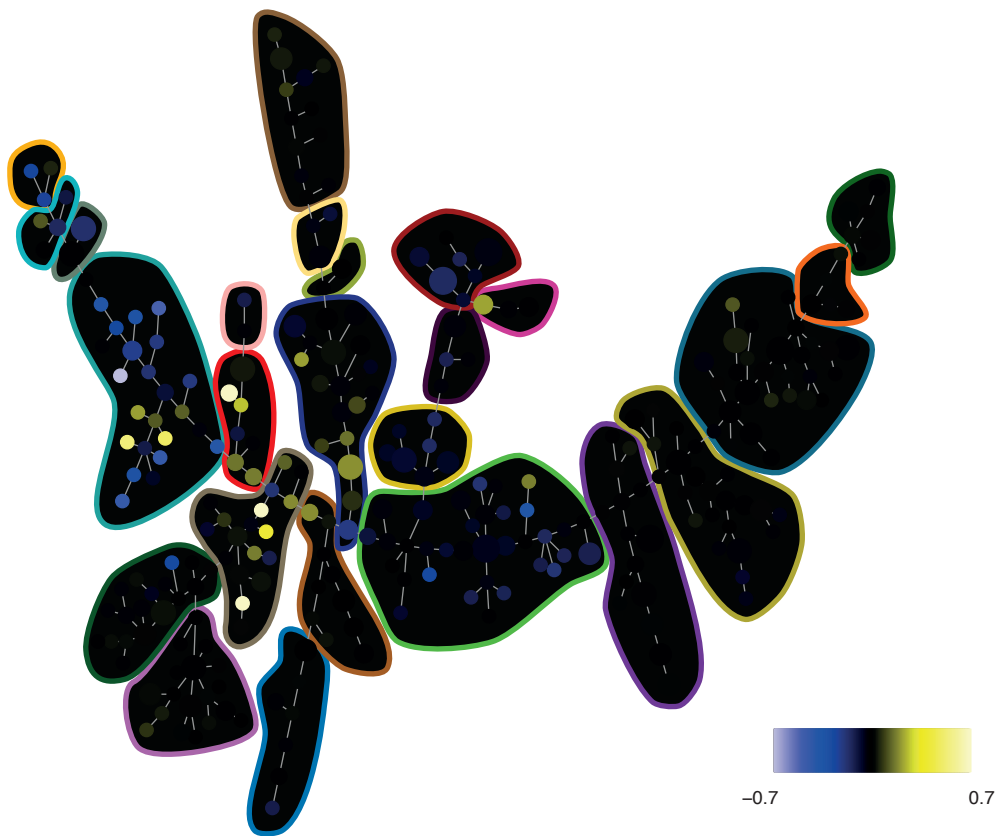



Figure S9B

153-pMAPKAPK2 ---- Dasatinib+BCR vs Ref Ratio

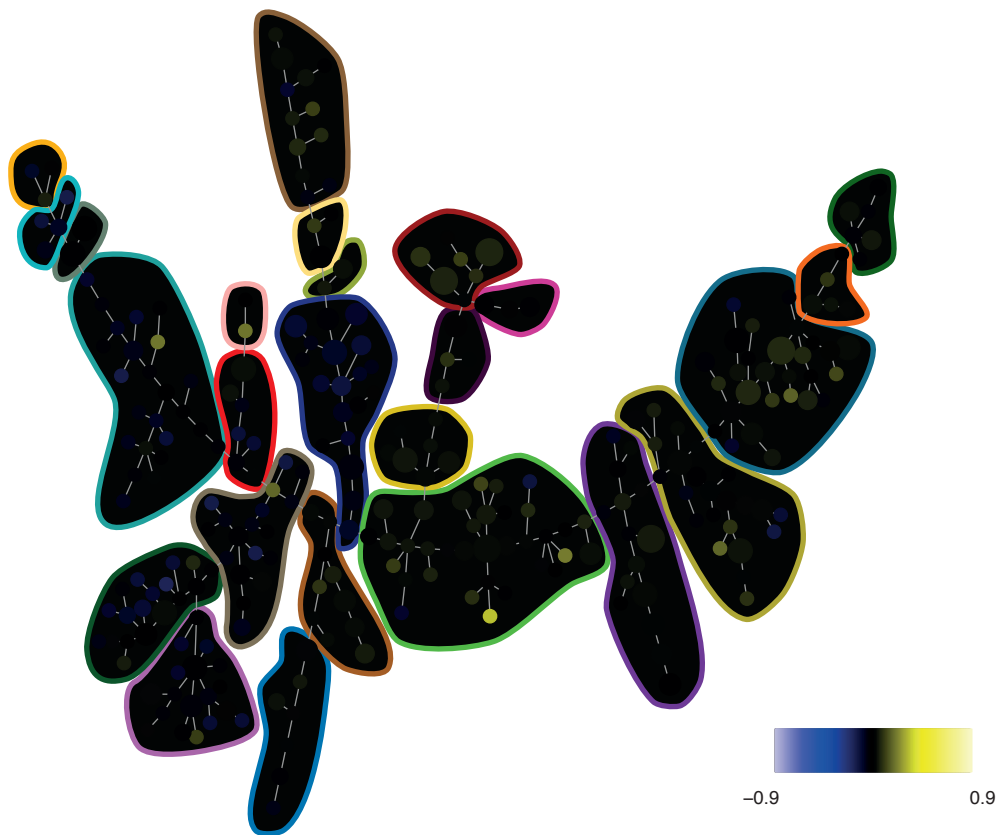

Figure S9B

153-pMAPKAPK2 ---- Dasatinib+Fit3L vs Ref Ratio

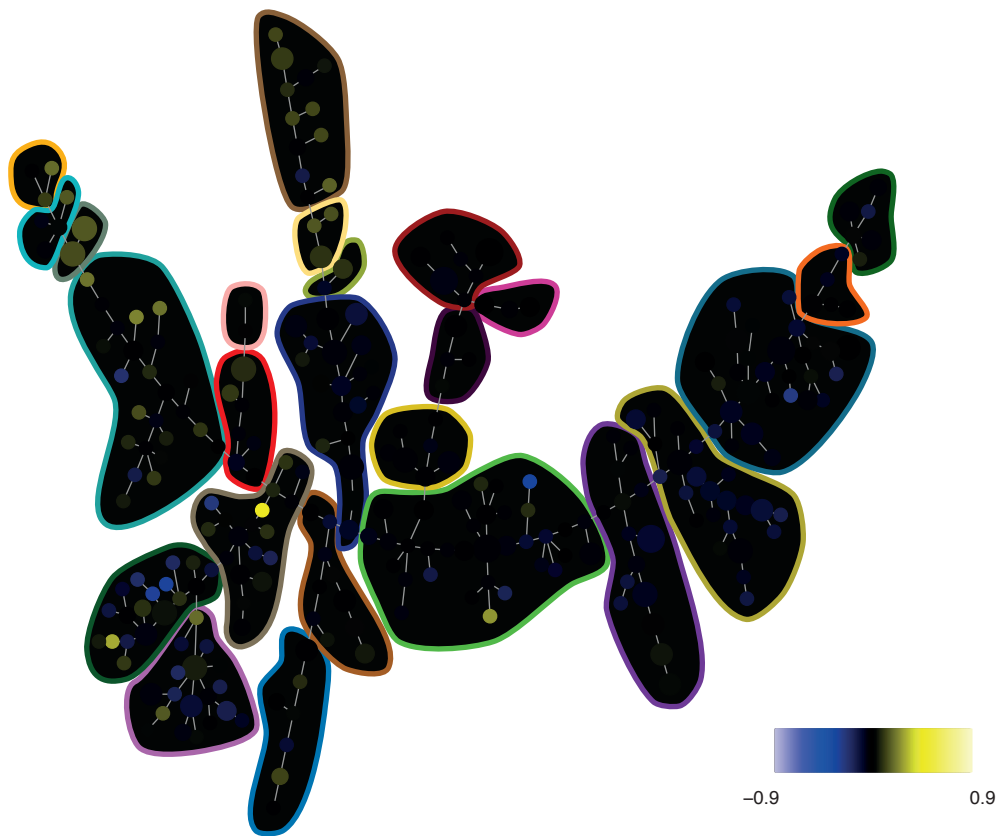

Figure S9B

153-pMAPKAPK2 ---- Dasatinib+IL7 vs Ref Ratio

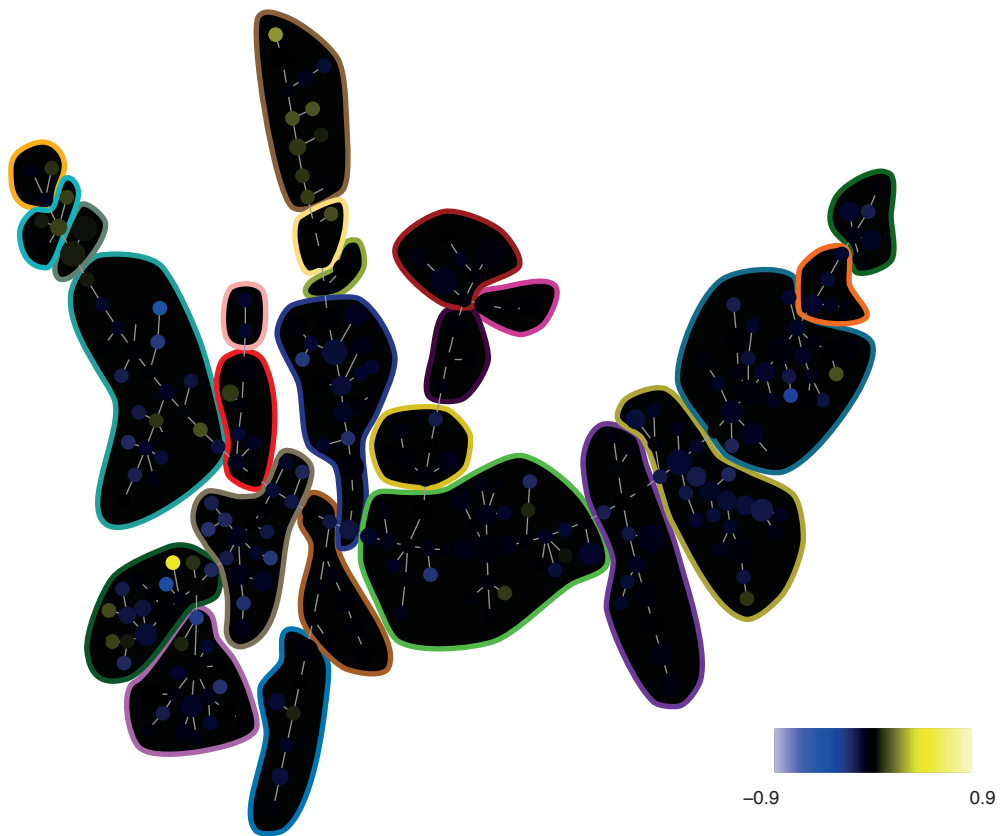

Figure S9B

153-pMAPKAPK2 ---- Dasatinib+PMAiono vs Ref Ratio

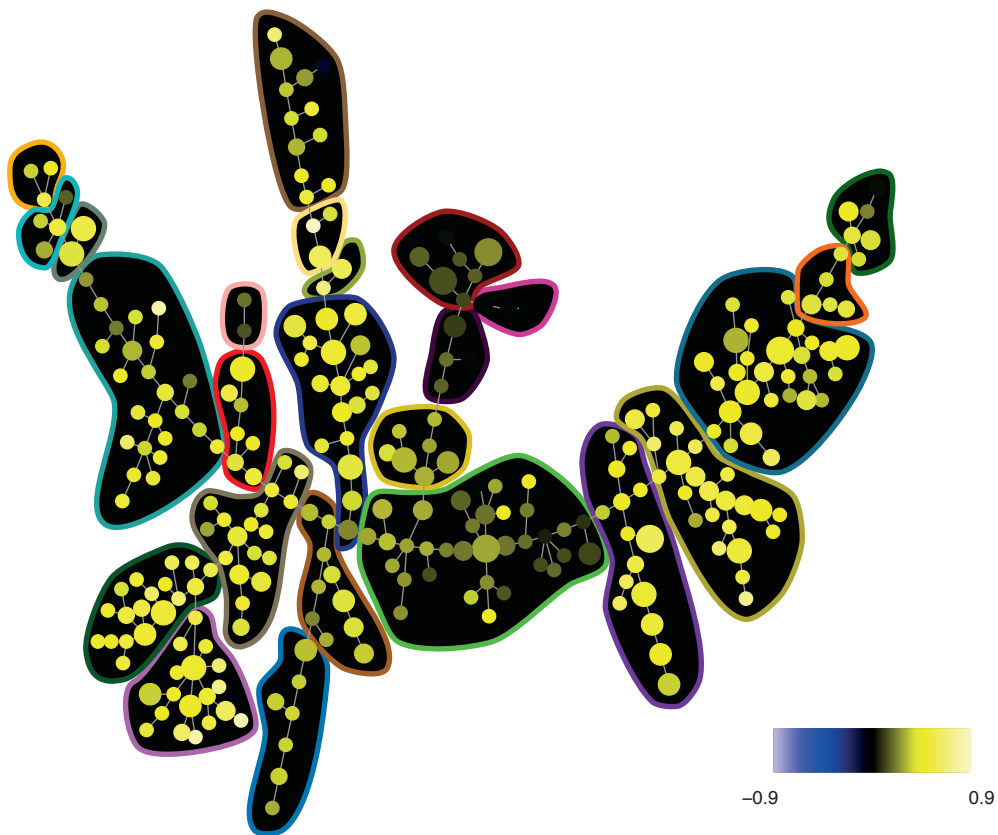

Figure S9B

153-pMAPKAPK2 ---- Dasatinib+PVO4 vs Ref Ratio

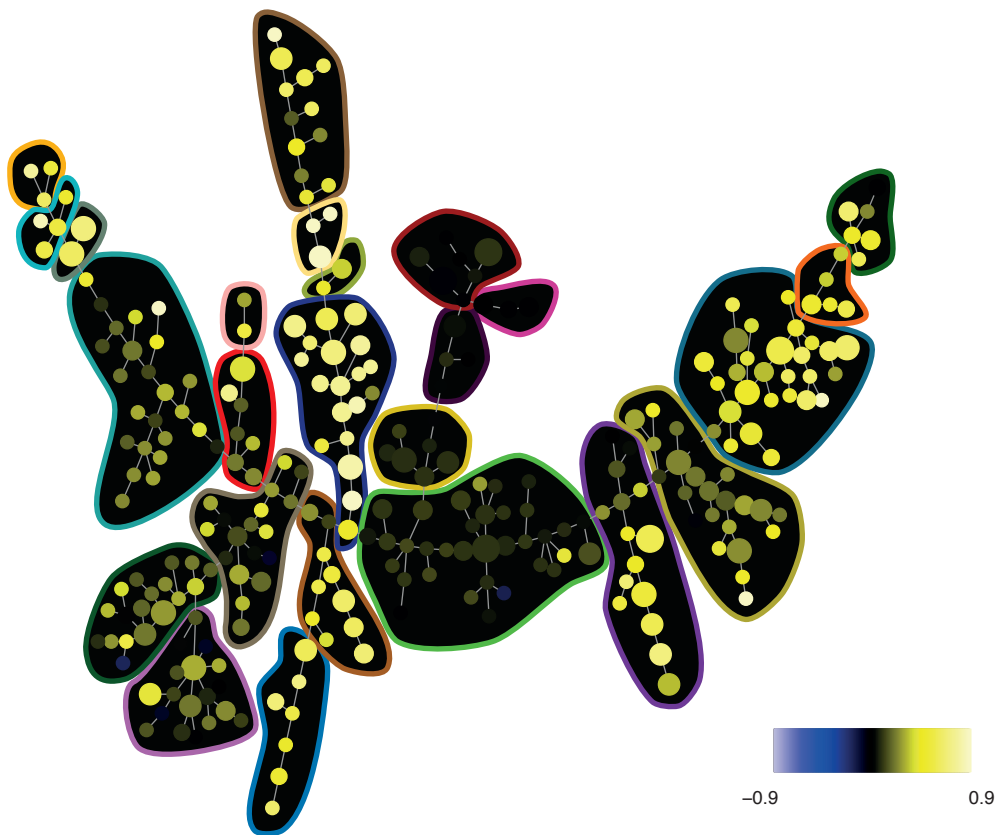

Figure S9B

153-pMAPKAPK2 ---- Dasatinib+Unstim vs Ref Ratio

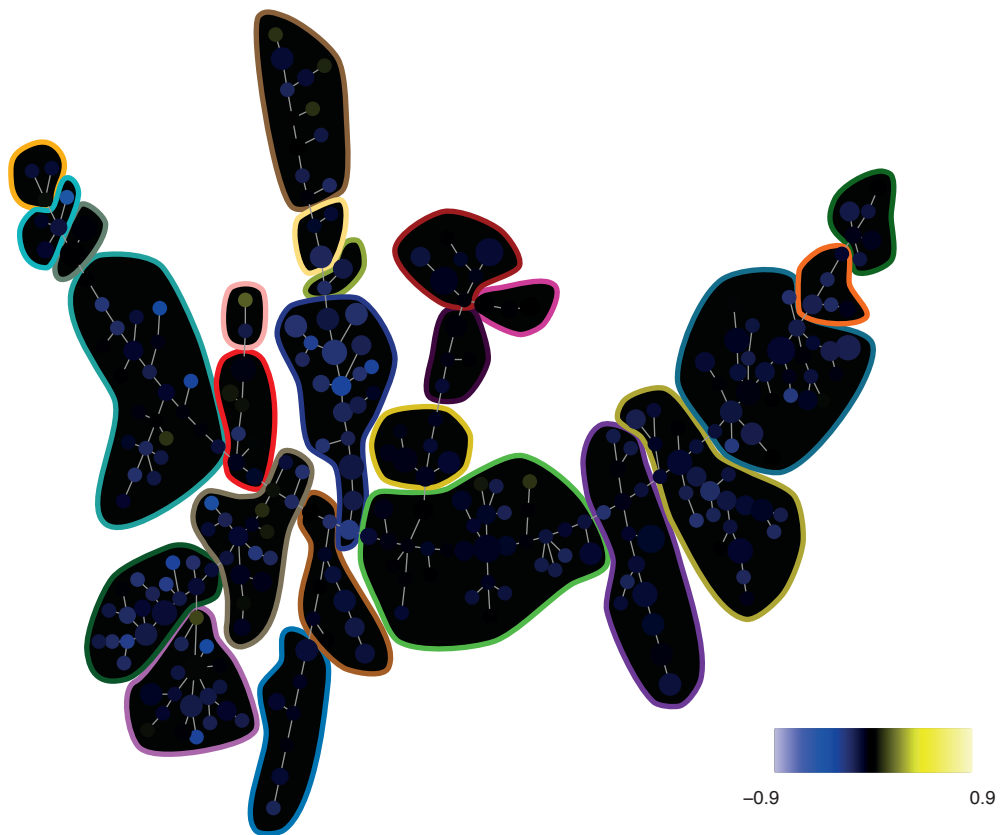

Figure S9B

154-pSHP2 --- Dasatinib+BCR vs Ref Ratio

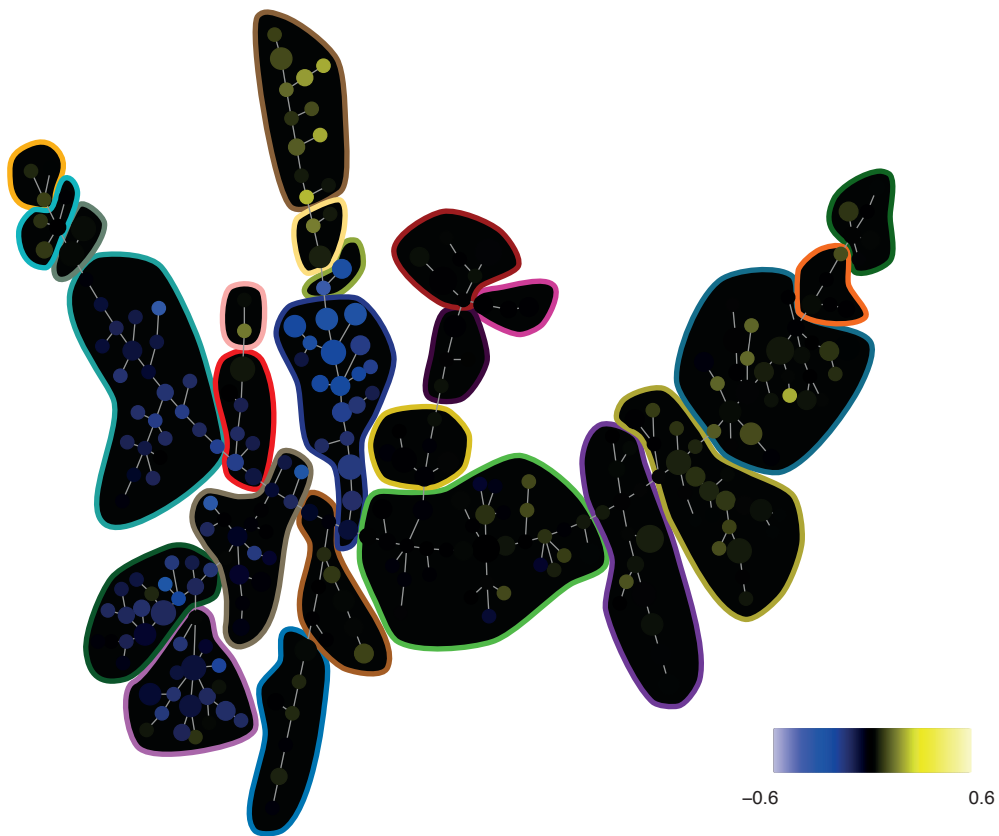

Figure S9B

154-pSHP2 --- Dasatinib+Flt3L vs Ref Ratio

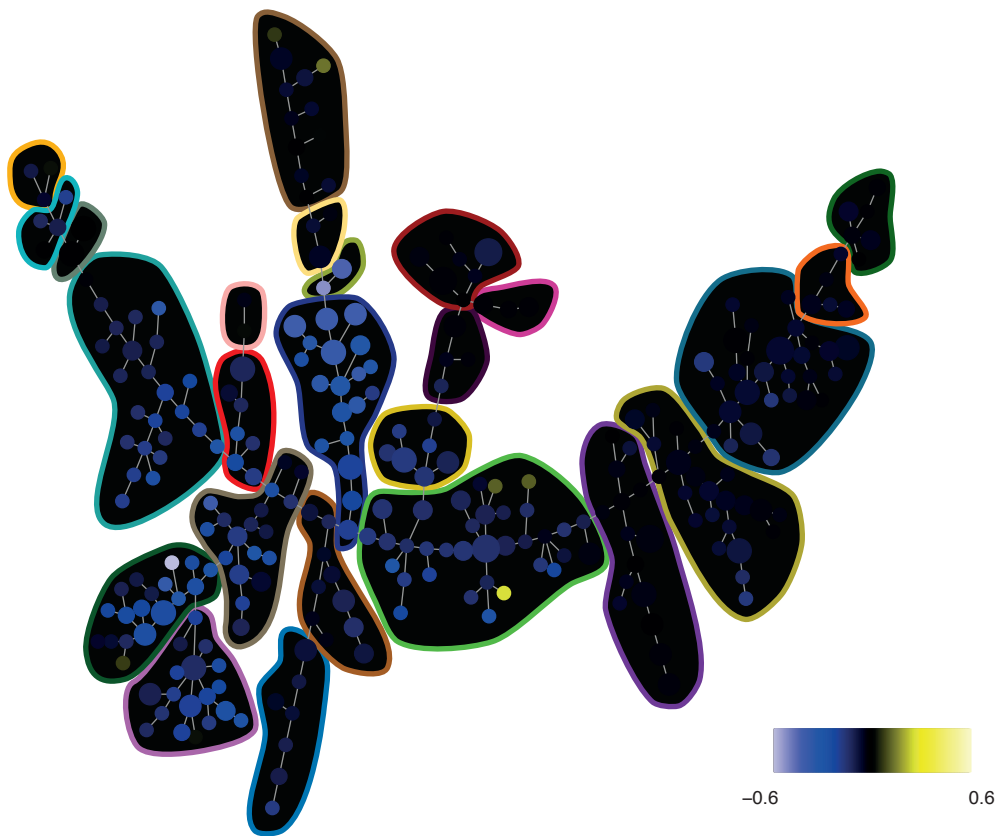



Figure S9B

154-pSHP2 ---- Dasatinib+IL7 vs Ref Ratio

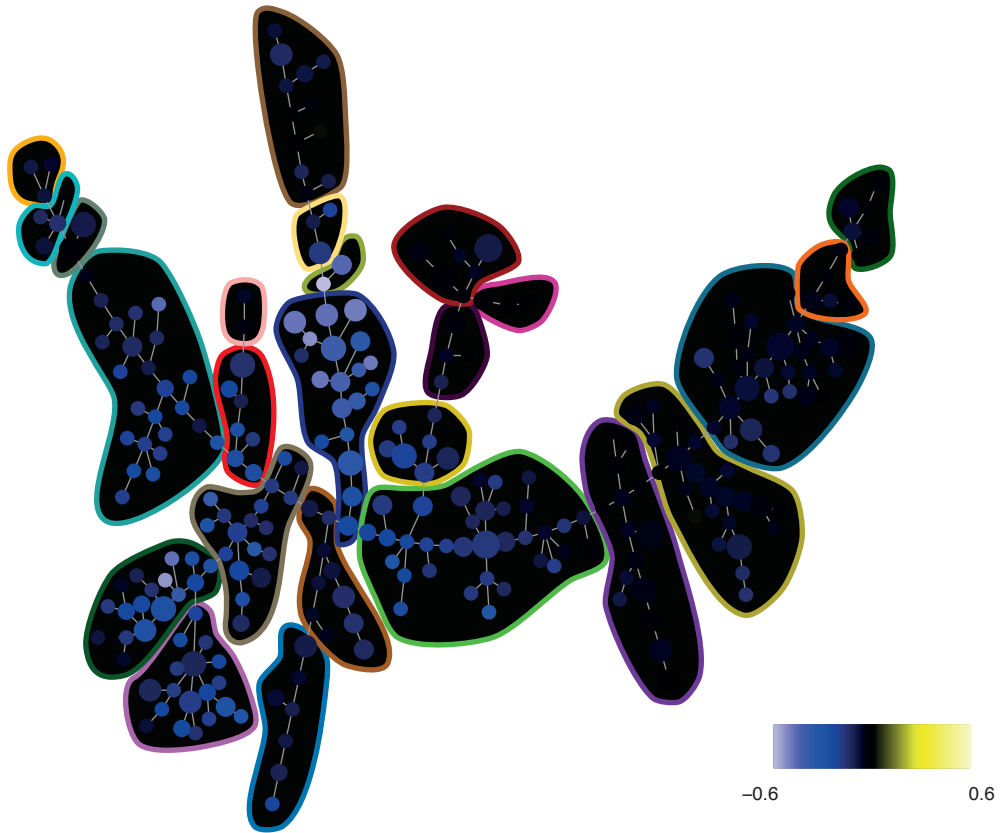

Figure S9B

154-pSHP2 ---- Dasatinib+PMAiono vs Ref Ratio

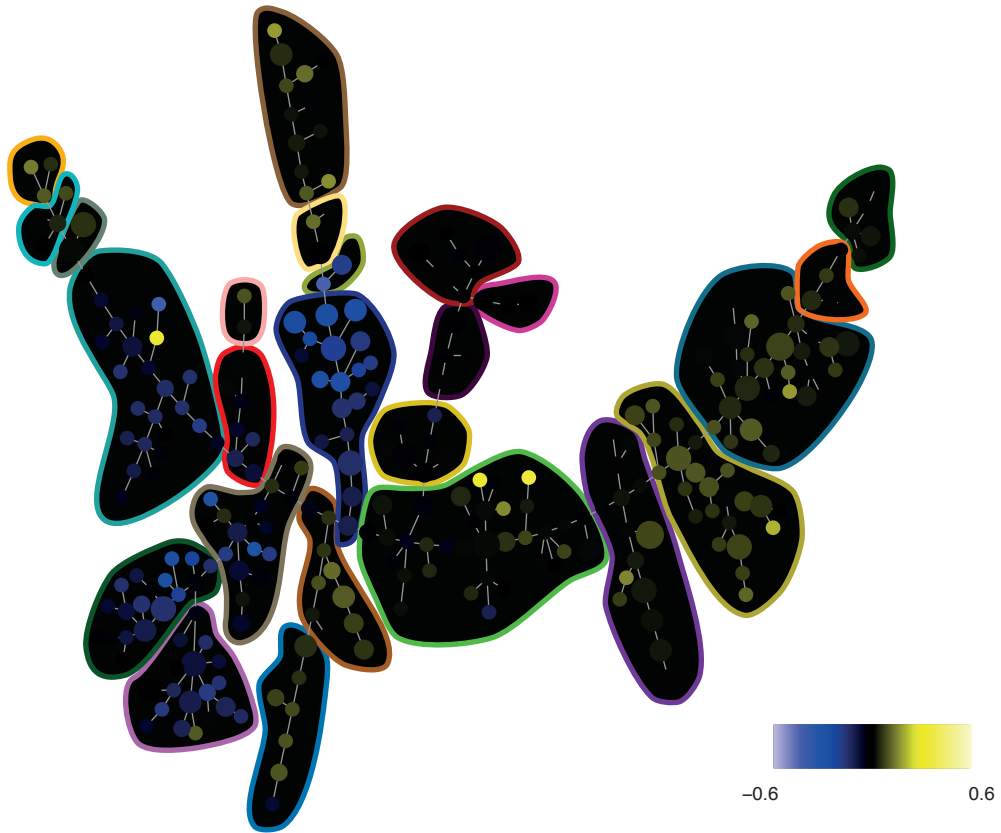

Figure S9B

154-pSHP2 ---- Dasatinib+PVO4 vs Ref Ratio

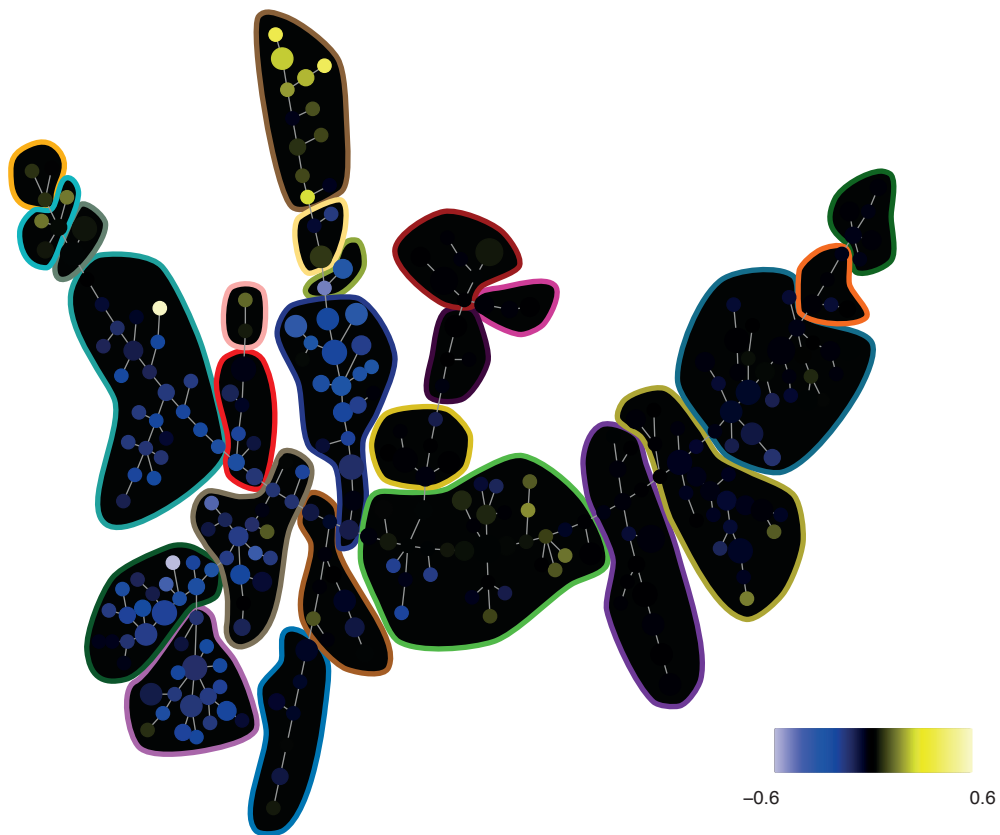

Figure S9B

154-pSHP2 --- Dasatinib+Unstim vs Ref Ratio

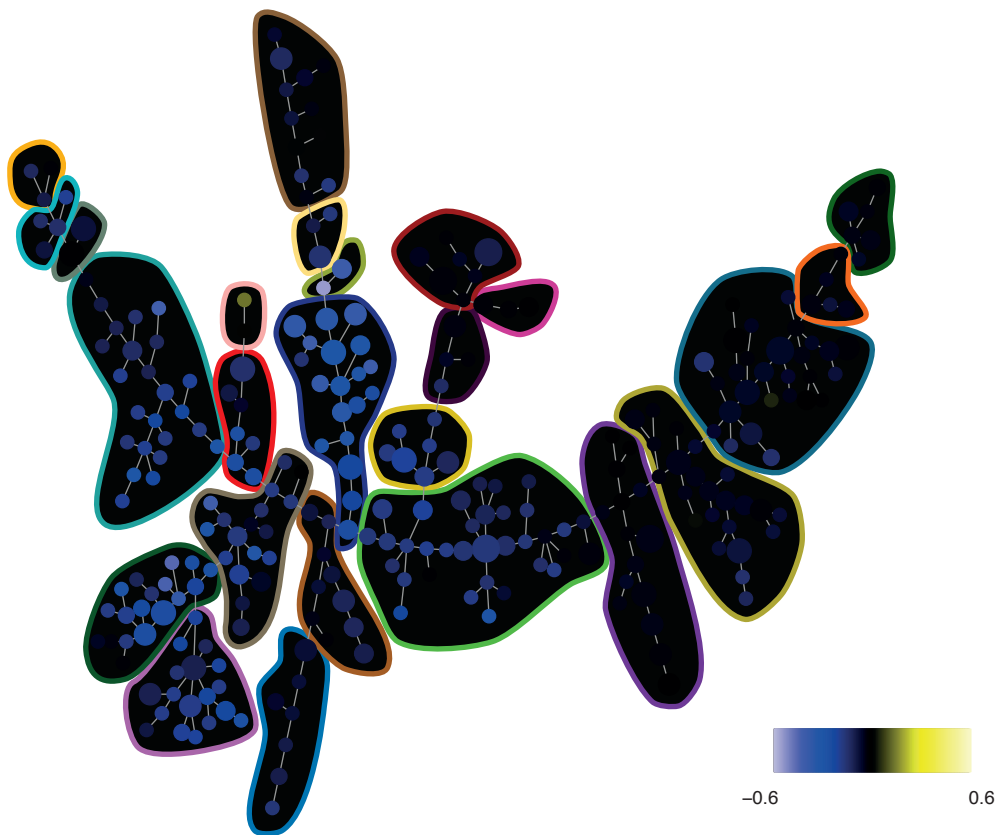

Figure S9B

156-pZAP70/Syk --- Dasatinib+BCR vs Ref Ratio

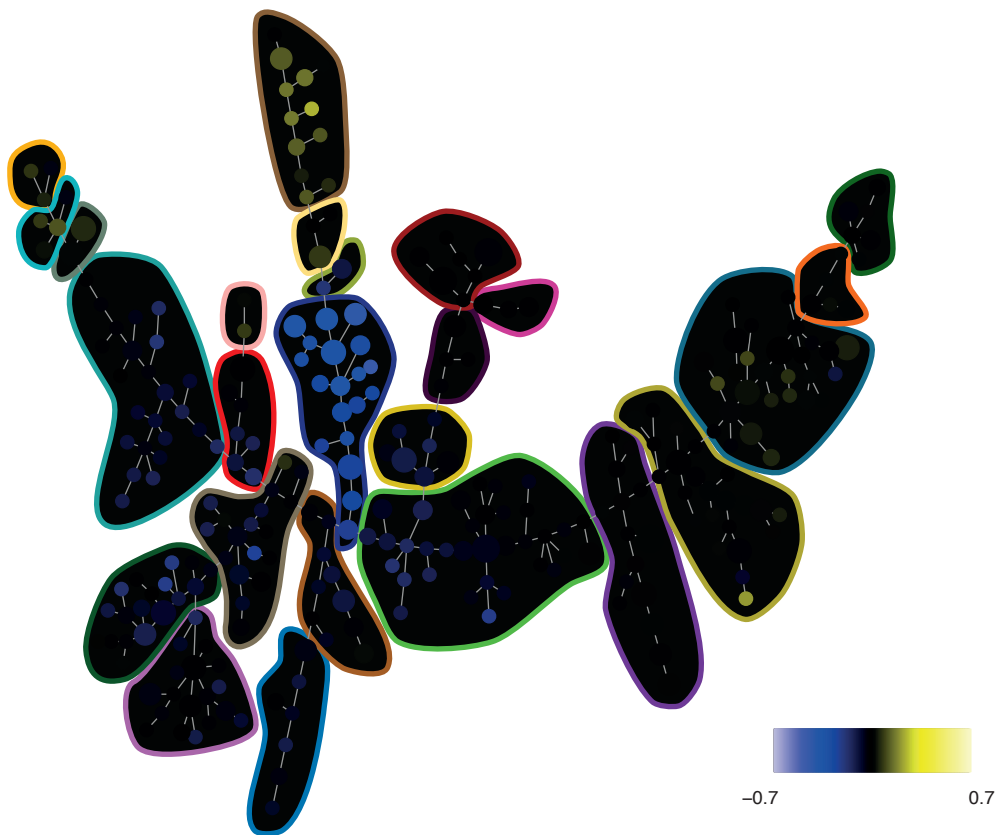

Figure S9B

156-pZAP70/Syk --- Dasatinib+Flt3L vs Ref Ratio

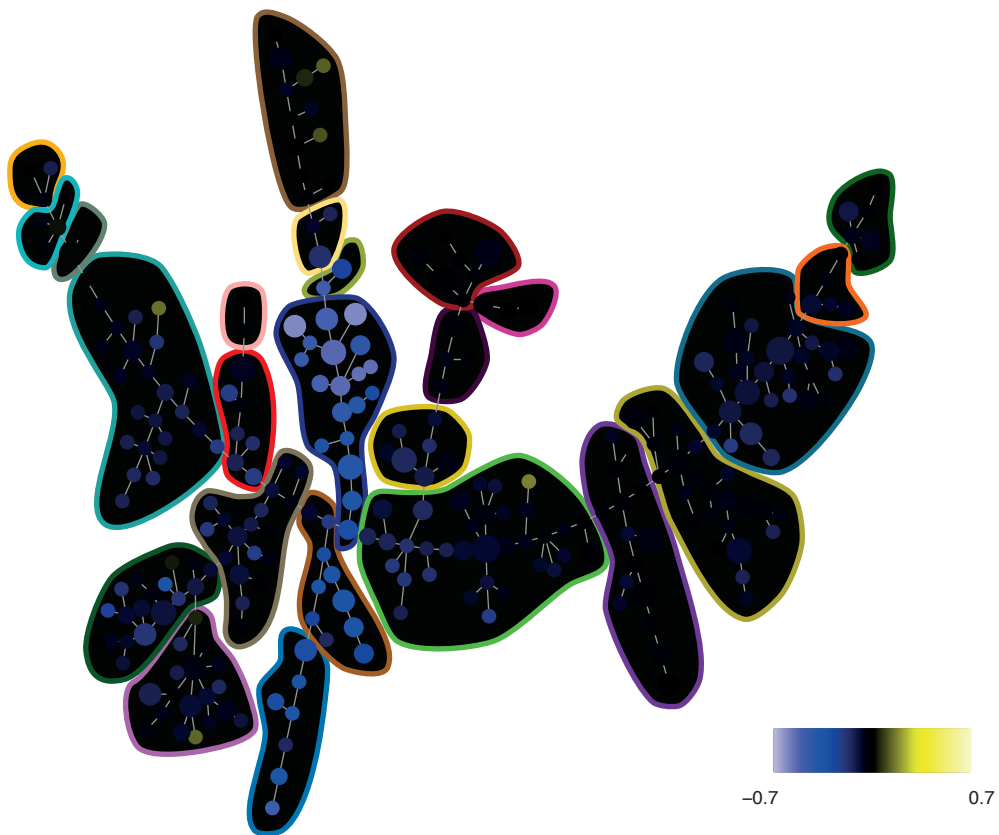

Figure S9B

156-pZAP70/Syk ---- Dasatinib+IL7 vs Ref Ratio

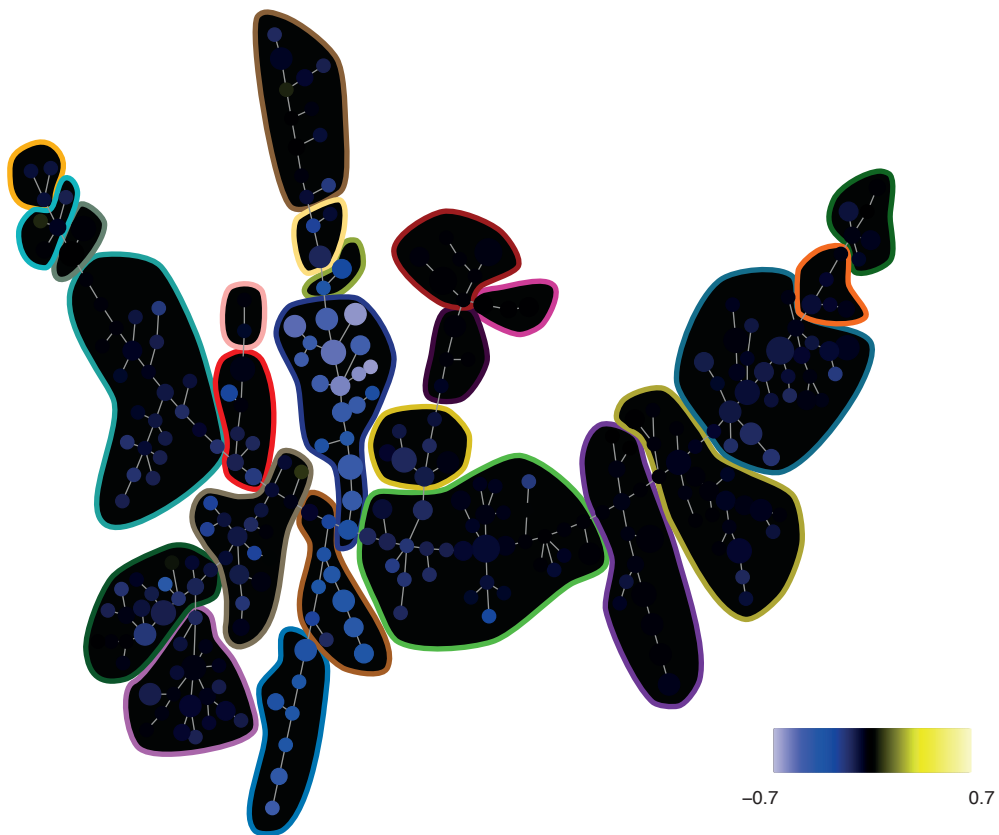

Figure S9B

156-pZAP70/Syk --- Dasatinib+PMAiono vs Ref Ratio

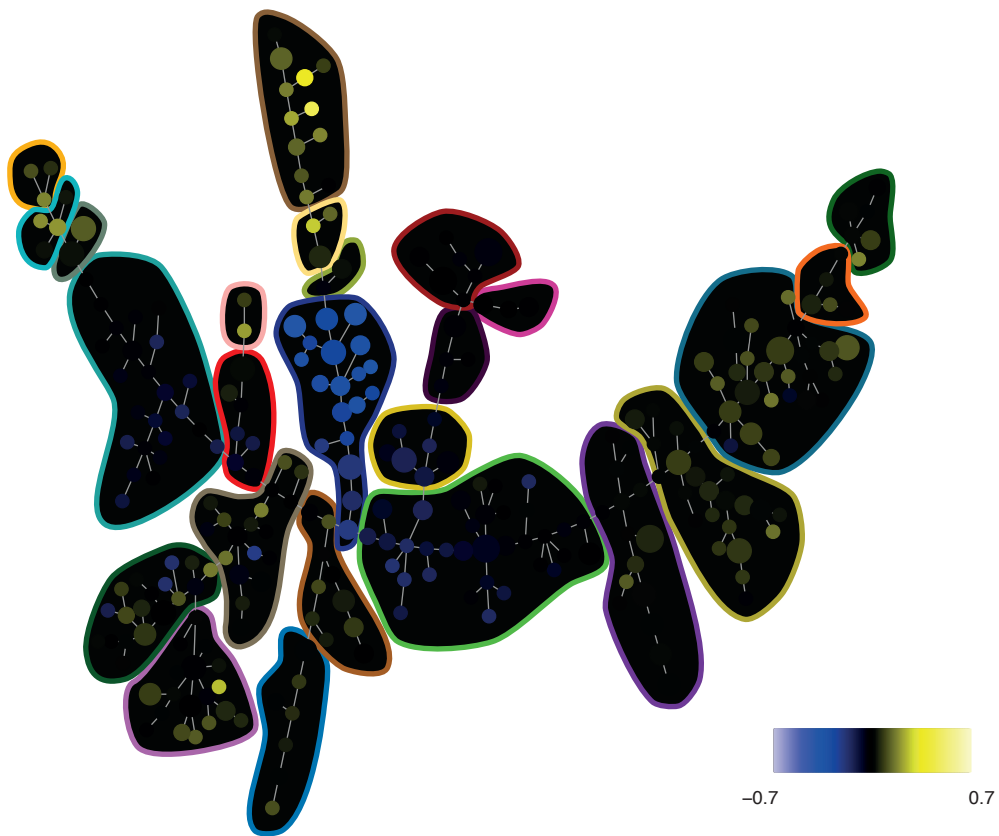



Figure S9B

156-pZAP70/Syk ---- Dasatinib+PVO4 vs Ref Ratio

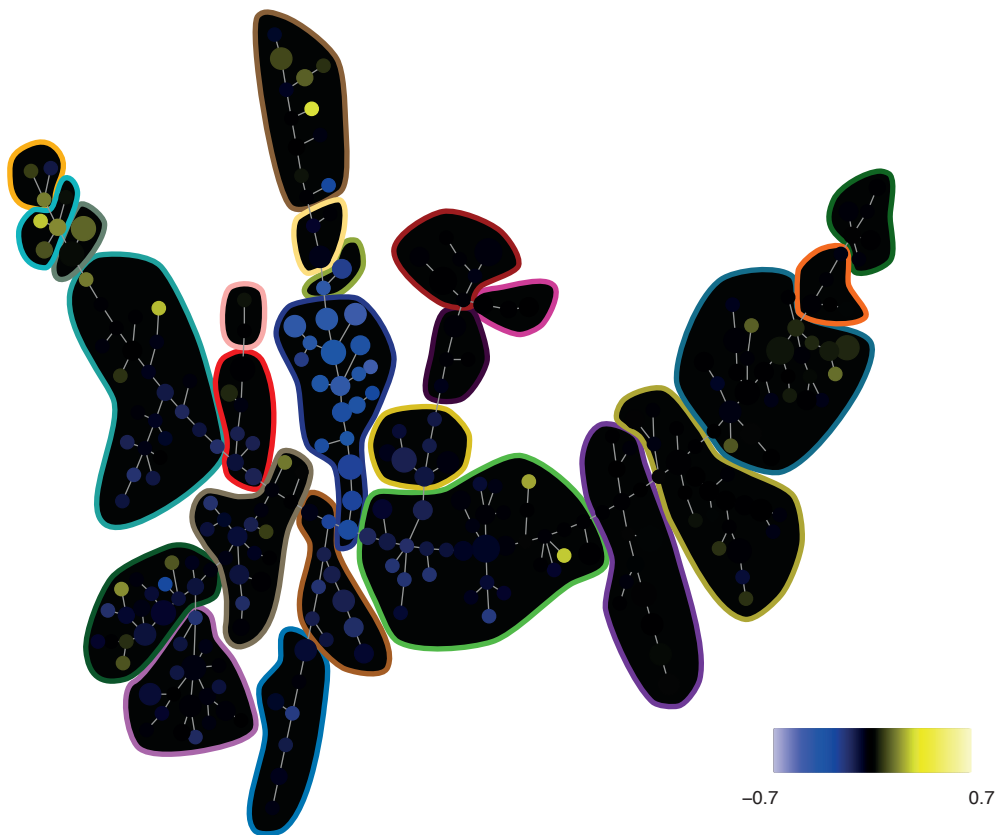

Figure S9B

156-pZAP70/Syk --- Dasatinib+Unstim vs Ref Ratio

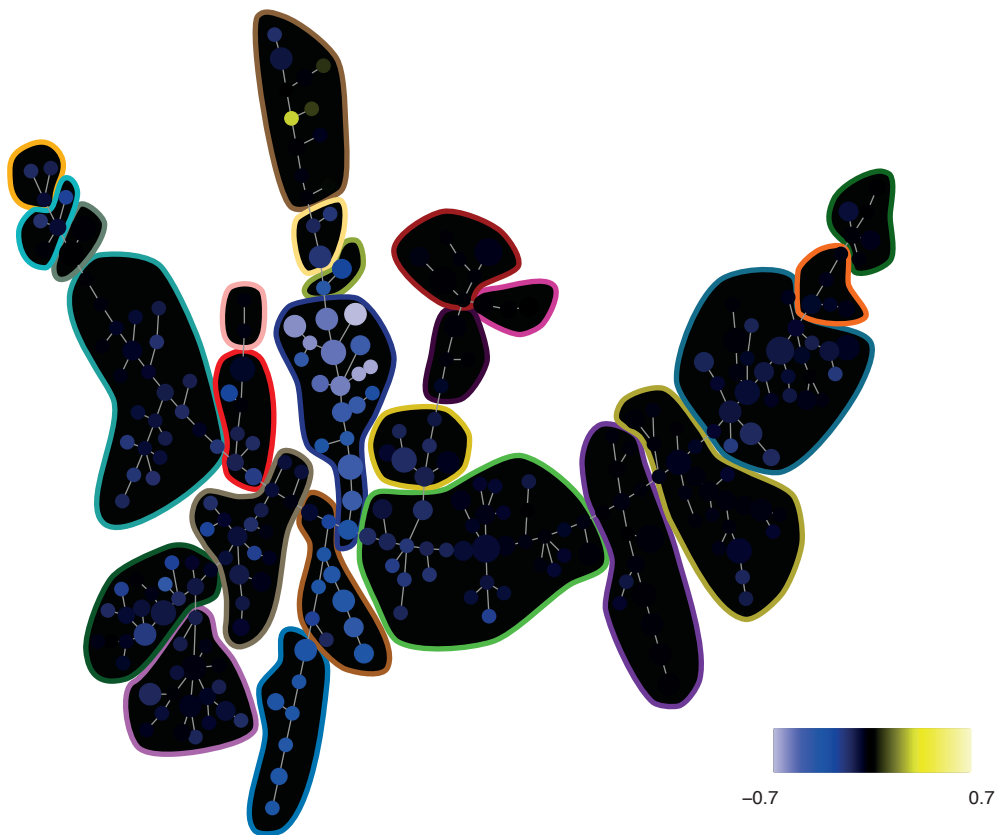

Figure S9B

159-pSTAT3 ---- Dasatinib+BCR vs Ref Ratio

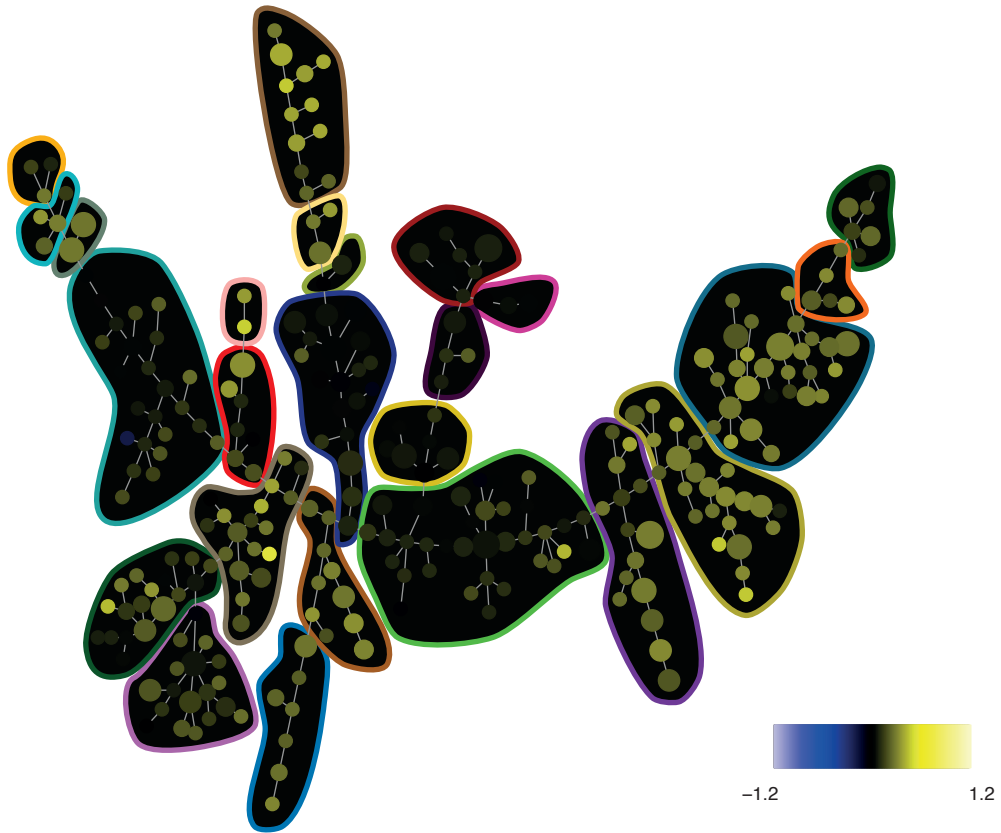

Figure S9B

159-pSTAT3 ---- Dasatinib+Flt3L vs Ref Ratio

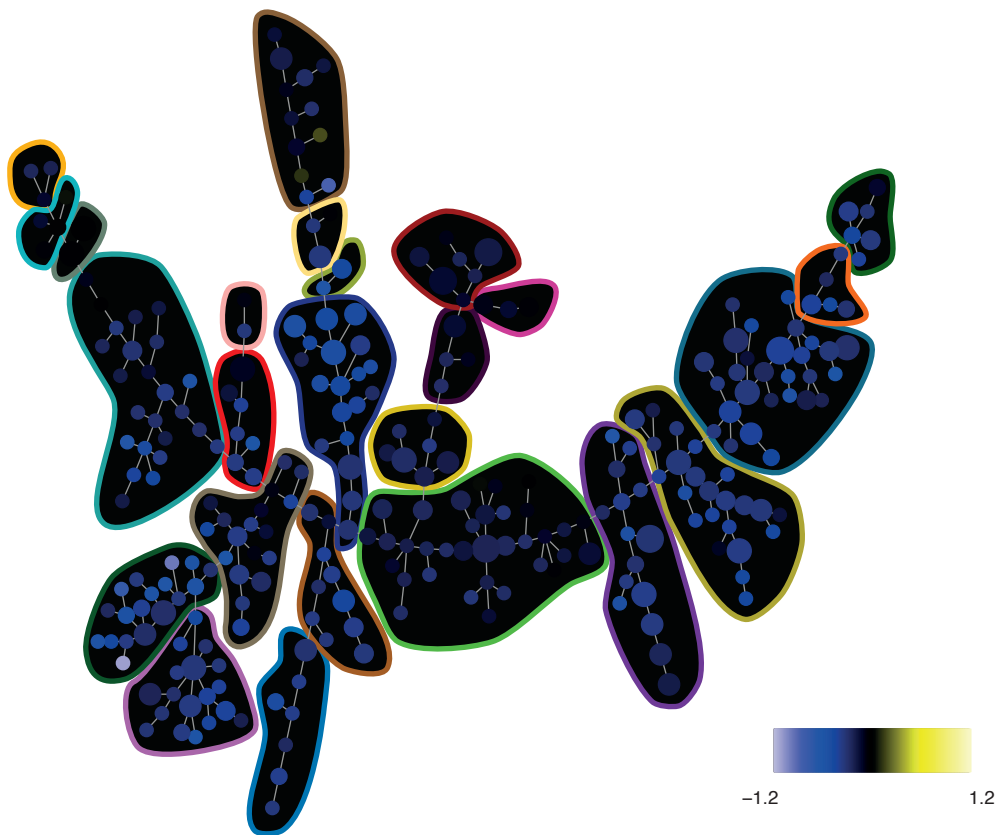

Figure S9B

159-pSTAT3 ---- Dasatinib+IL7 vs Ref Ratio

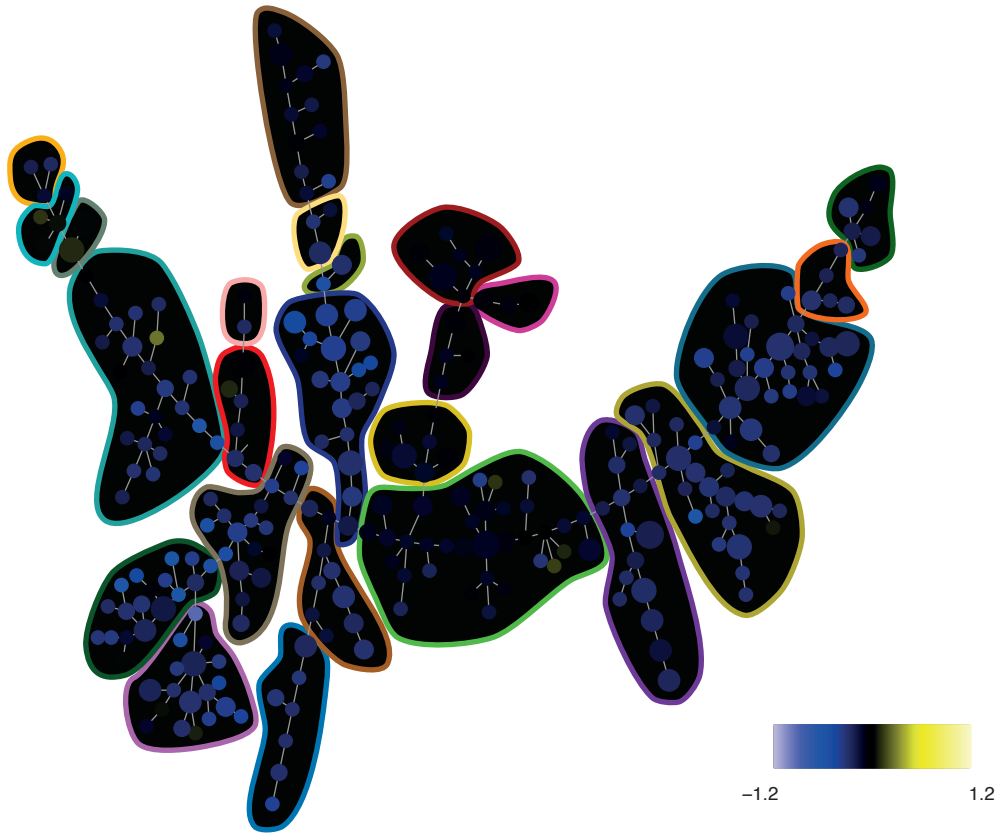

Figure S9B

159-pSTAT3 --- Dasatinib+PMAiono vs Ref Ratio

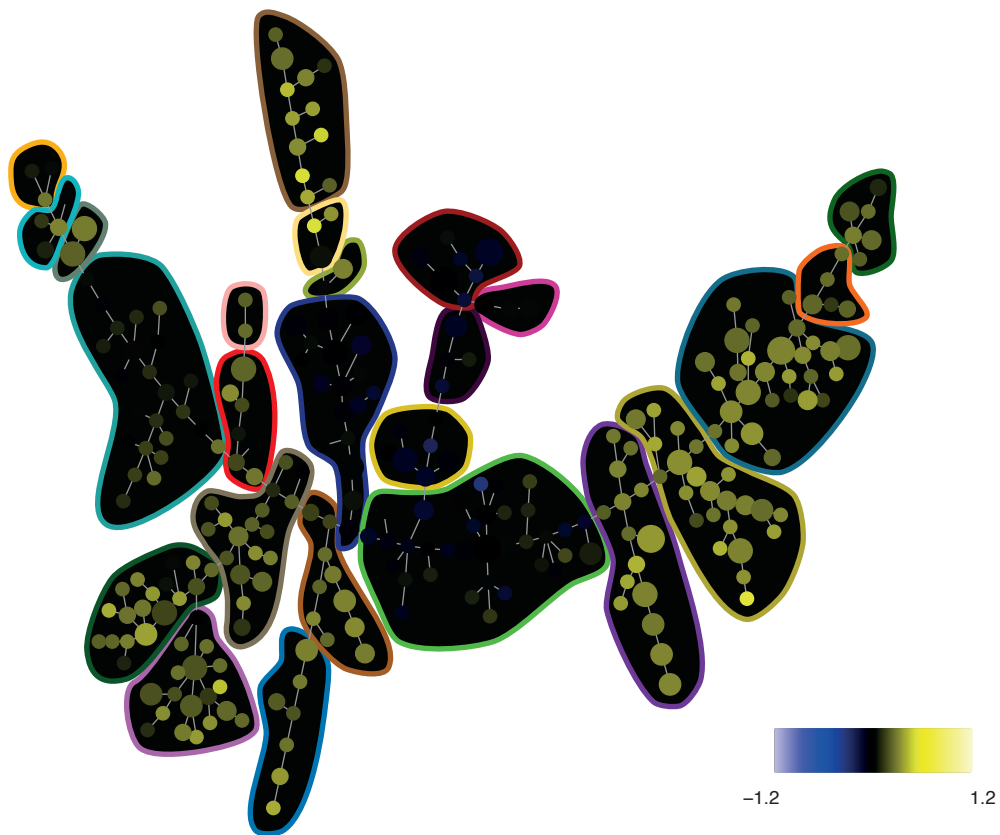

Figure S9B

159-pSTAT3 ---- Dasatinib+PVO4 vs Ref Ratio

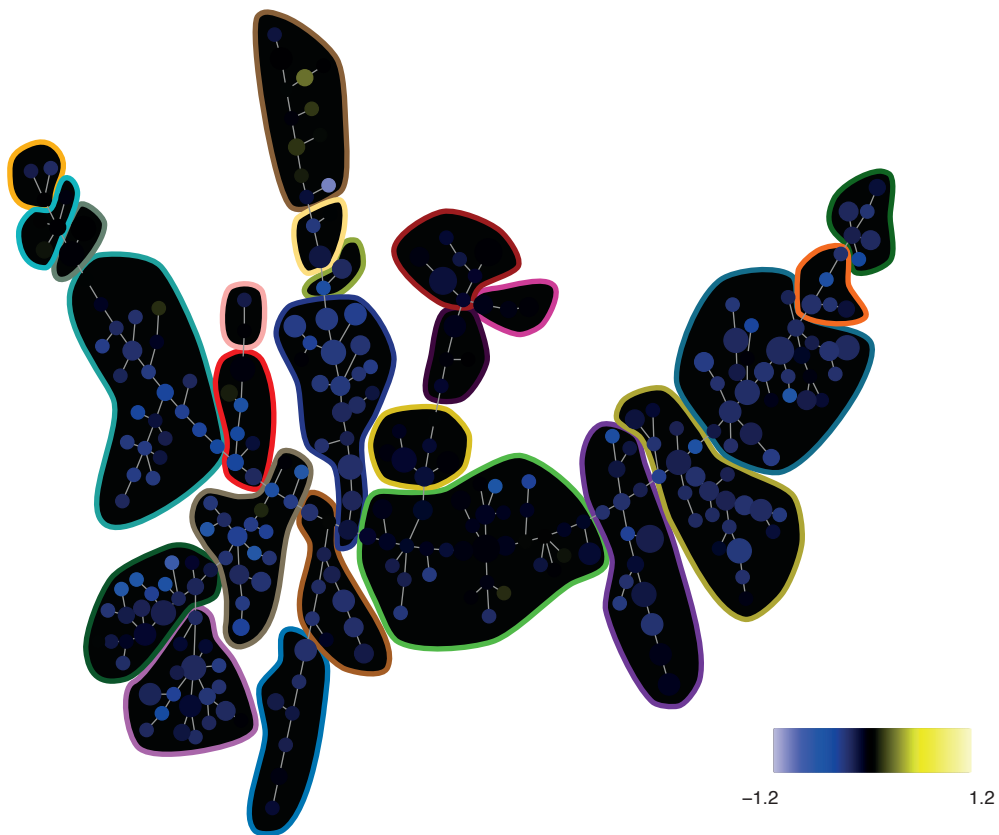

Figure S9B

159-pSTAT3 ---- Dasatinib+Unstim vs Ref Ratio

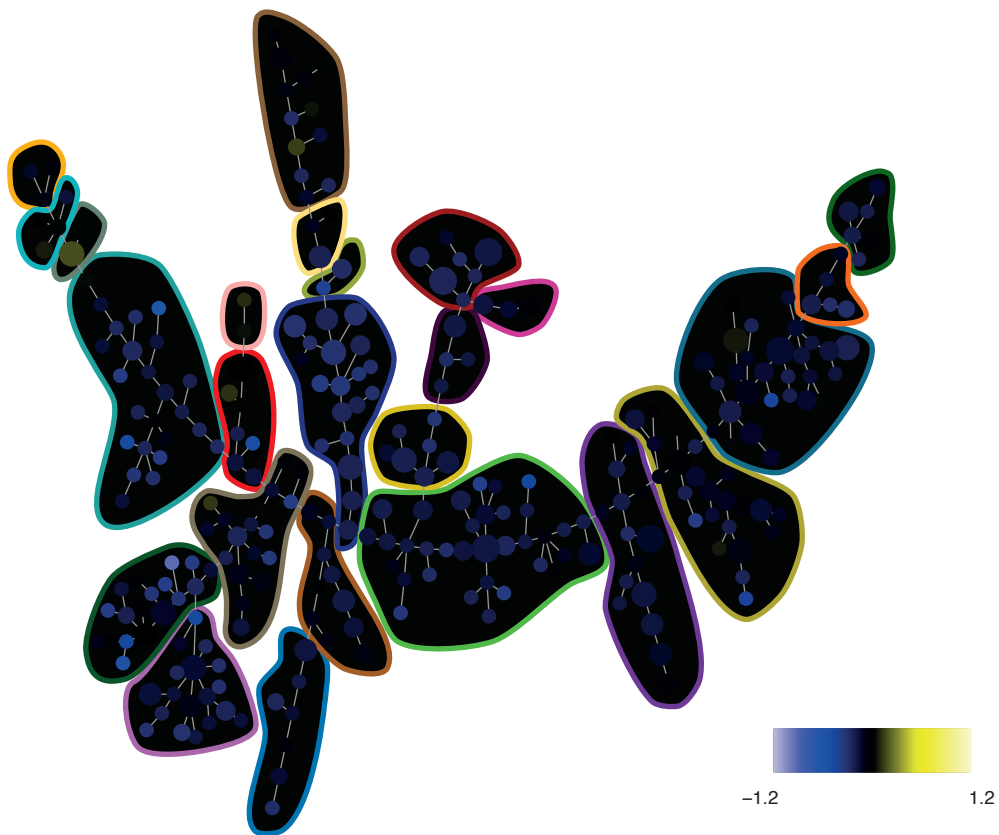



Figure S9B

164-pSLP-76 ---- Dasatinib+BCR vs Ref Ratio

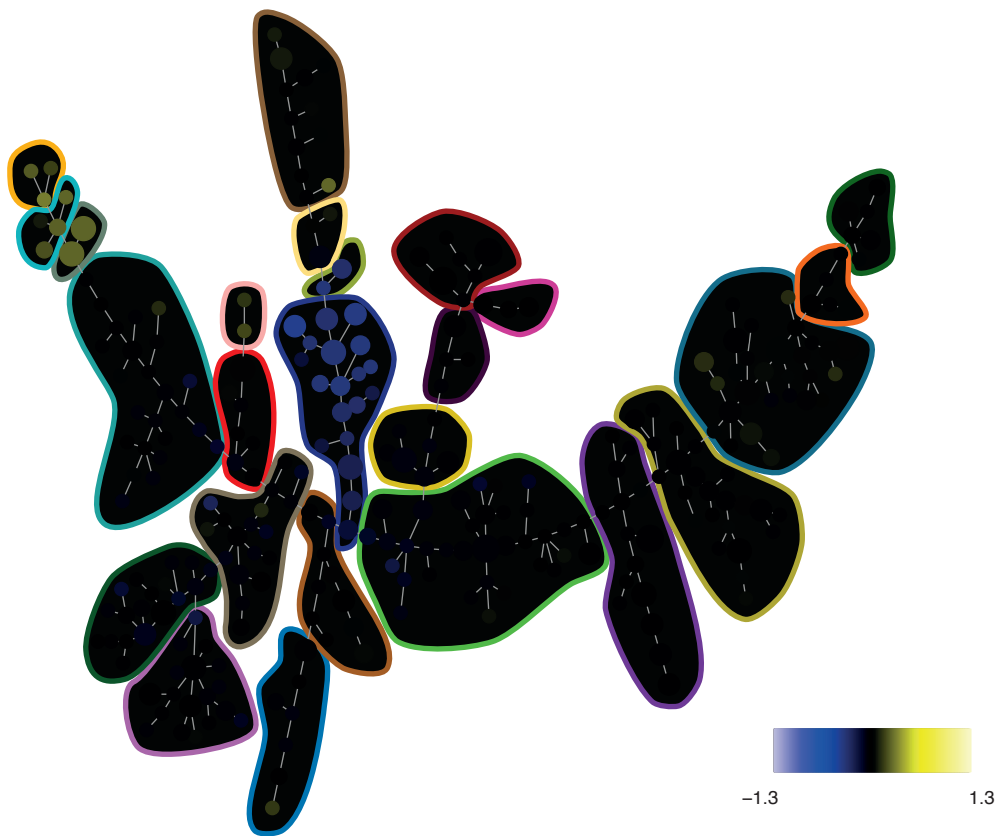

Figure S9B

164-pSLP-76 ---- Dasatinib+Flt3L vs Ref Ratio

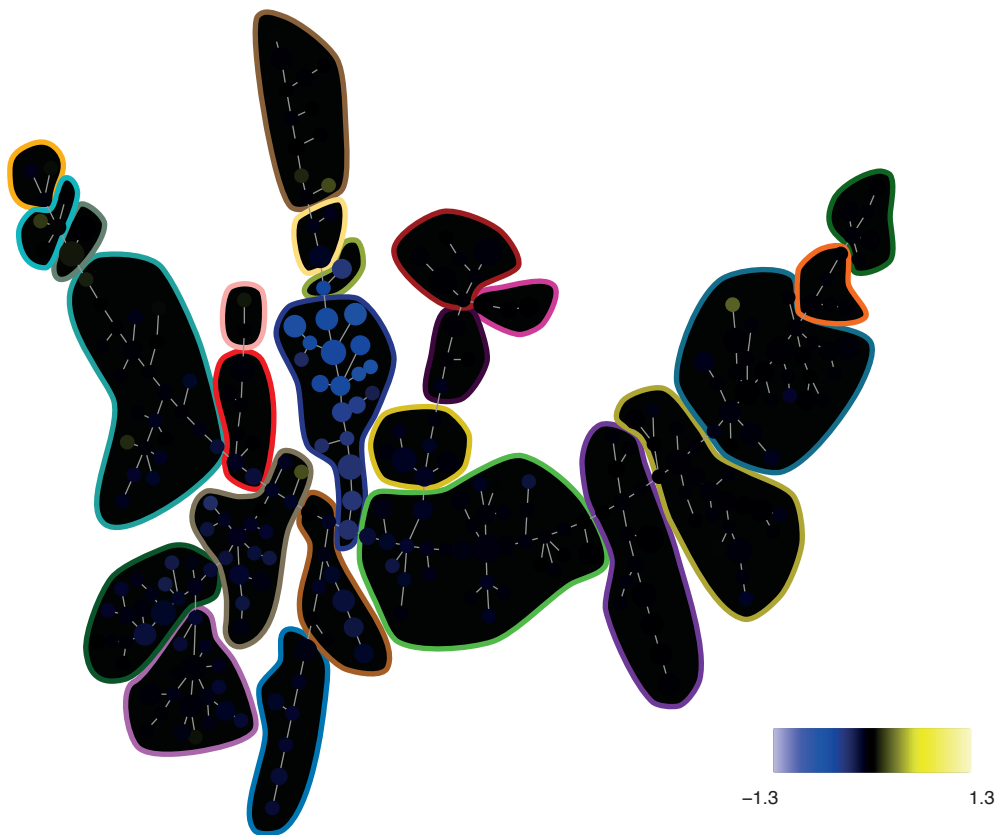

Figure S9B

164-pSLP-76 ---- Dasatinib+IL7 vs Ref Ratio

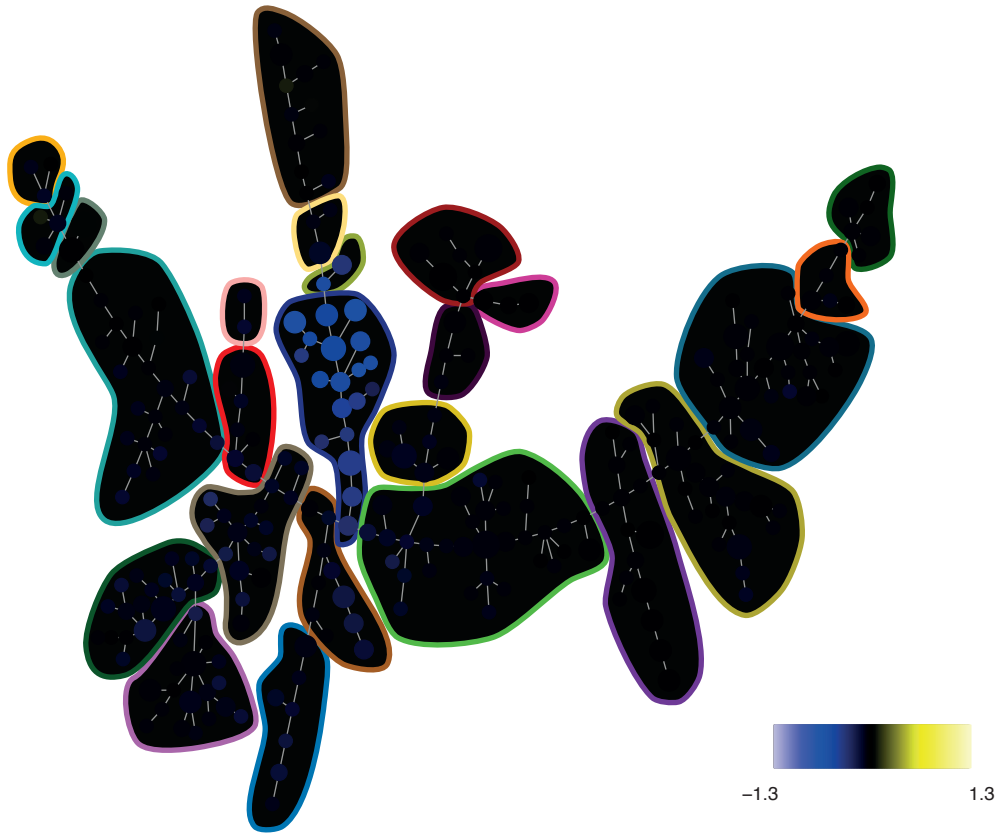

Figure S9B

164-pSLP-76 --- Dasatinib+PMAiono vs Ref Ratio

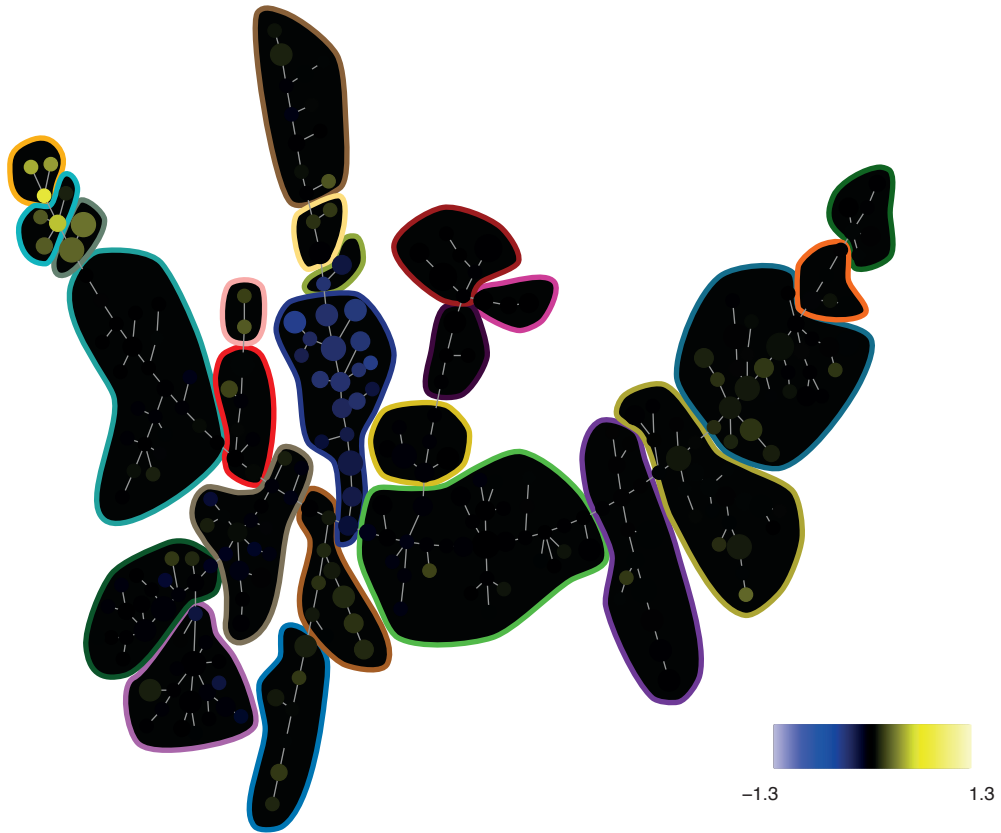

Figure S9B

164-pSLP-76 ---- Dasatinib+PVO4 vs Ref Ratio

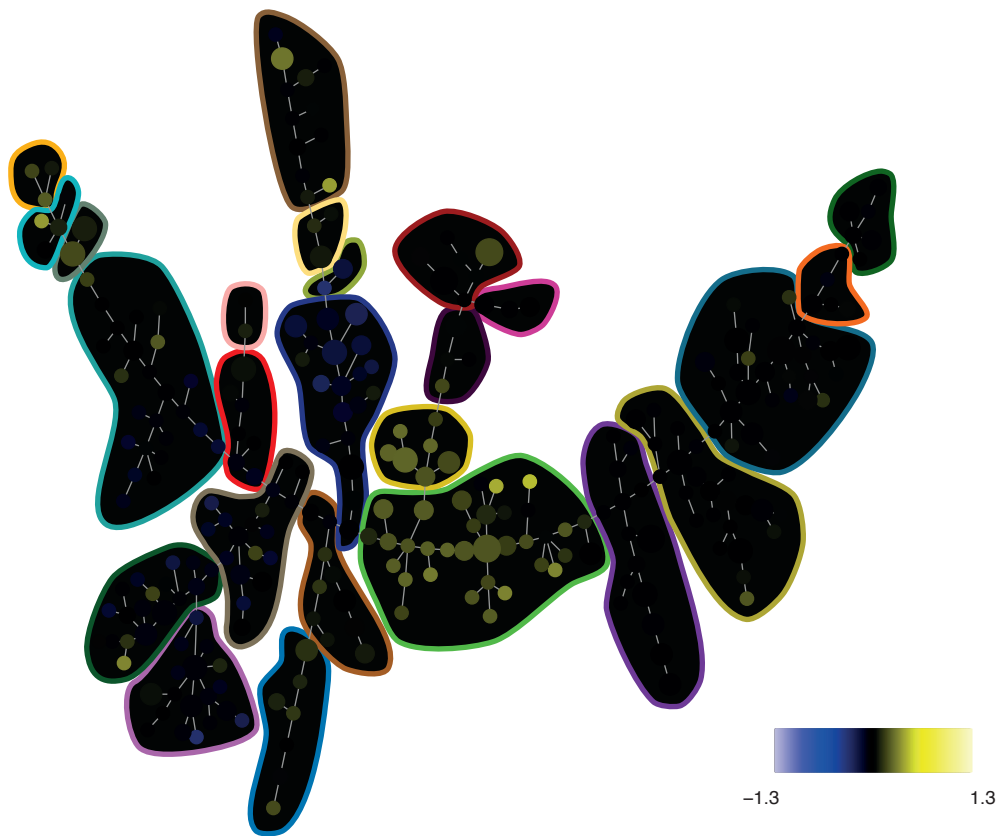

Figure S9B

164-pSLP-76 --- Dasatinib+Unstim vs Ref Ratio

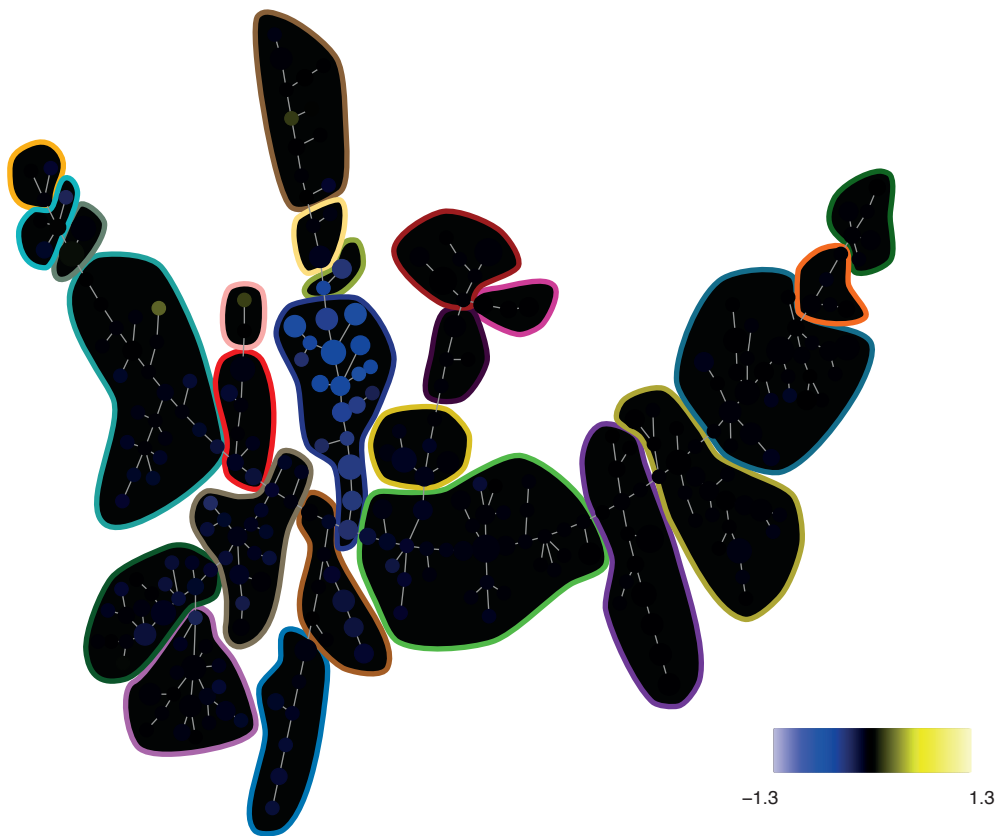

Figure S9B

165-pNFkB --- Dasatinib+BCR vs Ref Ratio

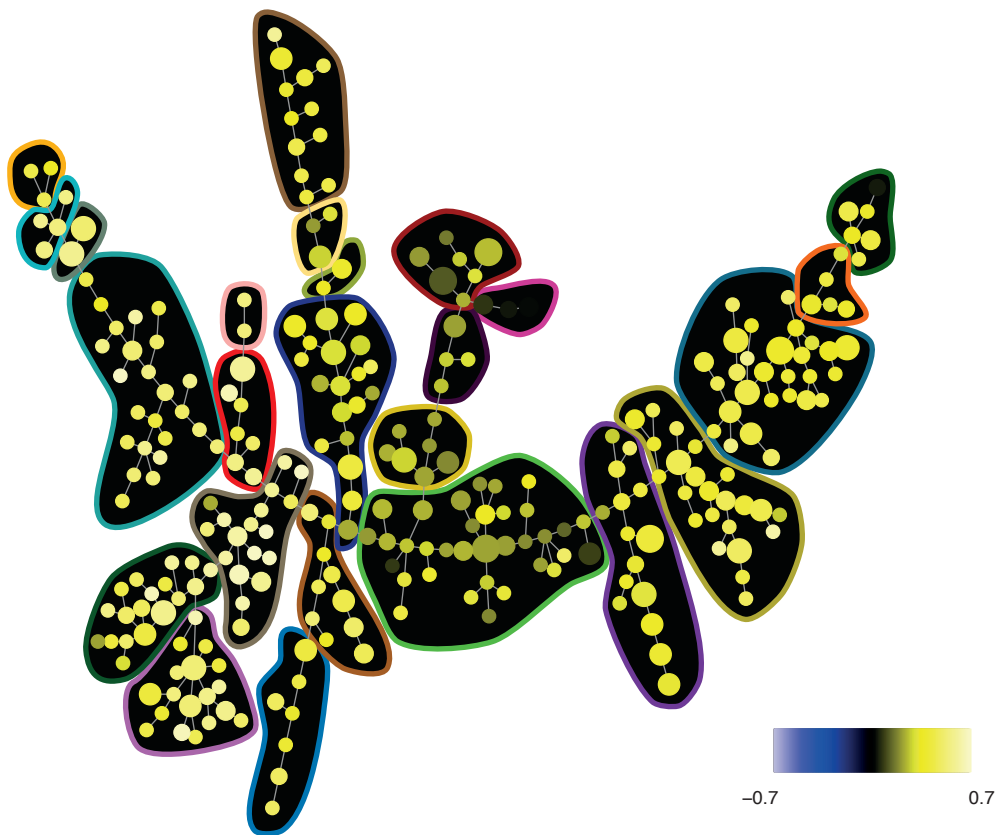

Figure S9B

165-pNFkB ---- Dasatinib+Flt3L vs Ref Ratio

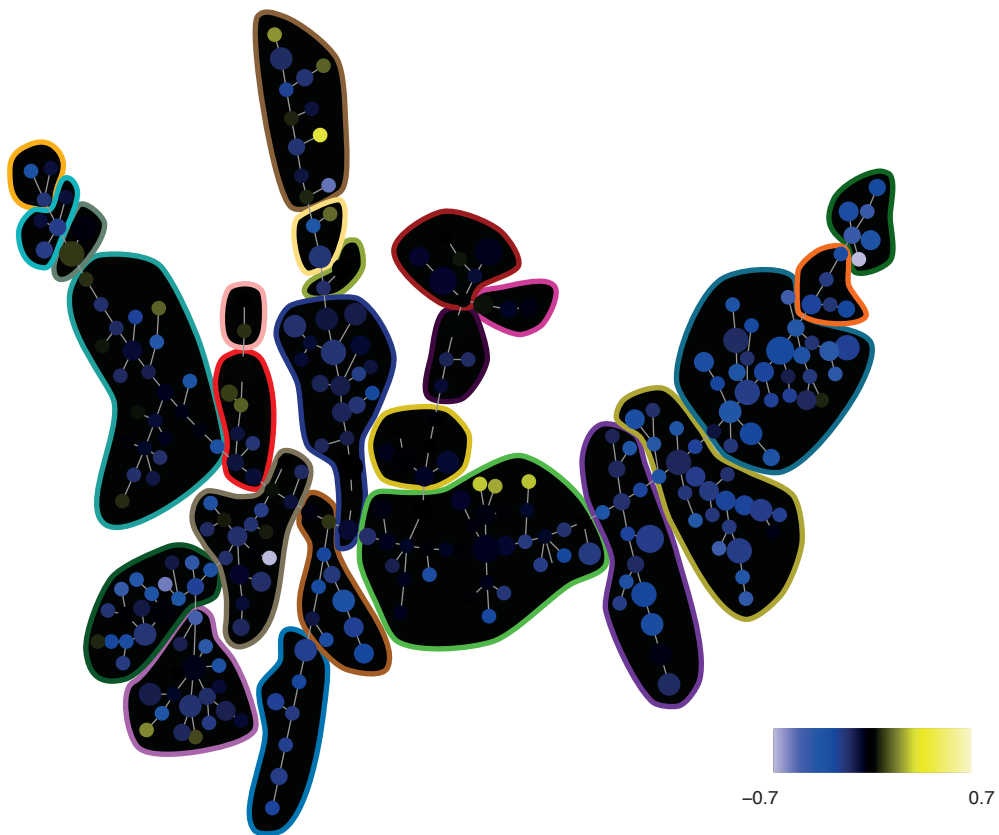



Figure S9B

165-pNFkB ---- Dasatinib+IL7 vs Ref Ratio

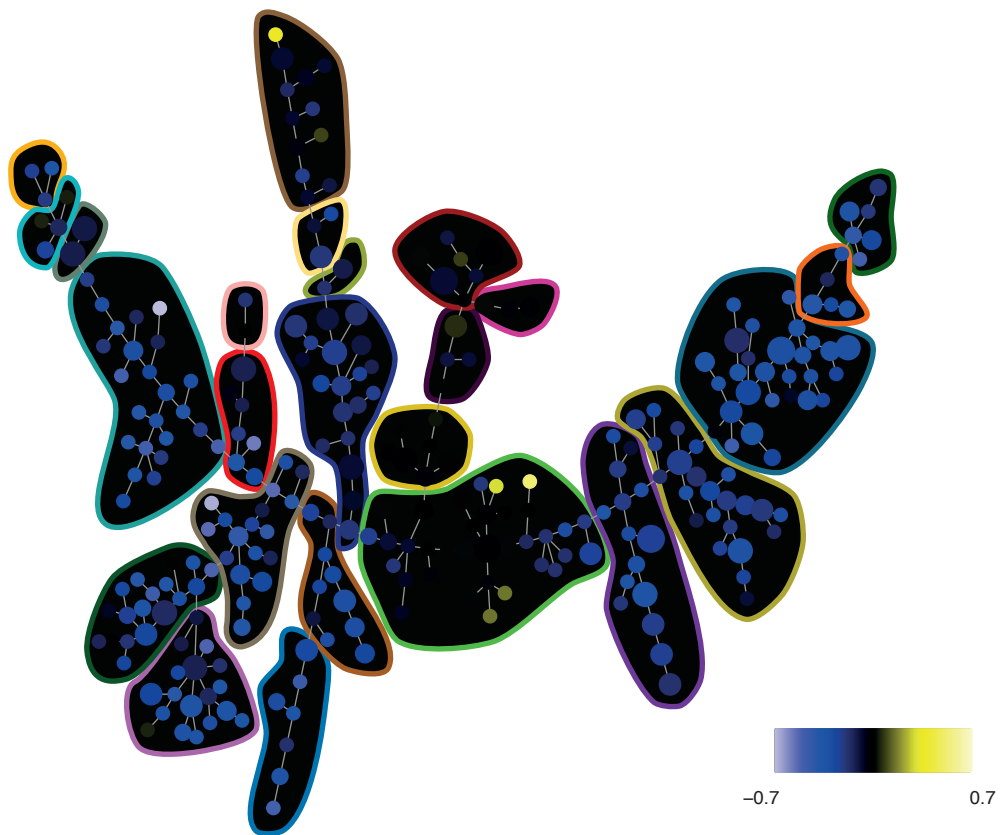

Figure S9B

165-pNFkB ---- Dasatinib+PMAiono vs Ref Ratio

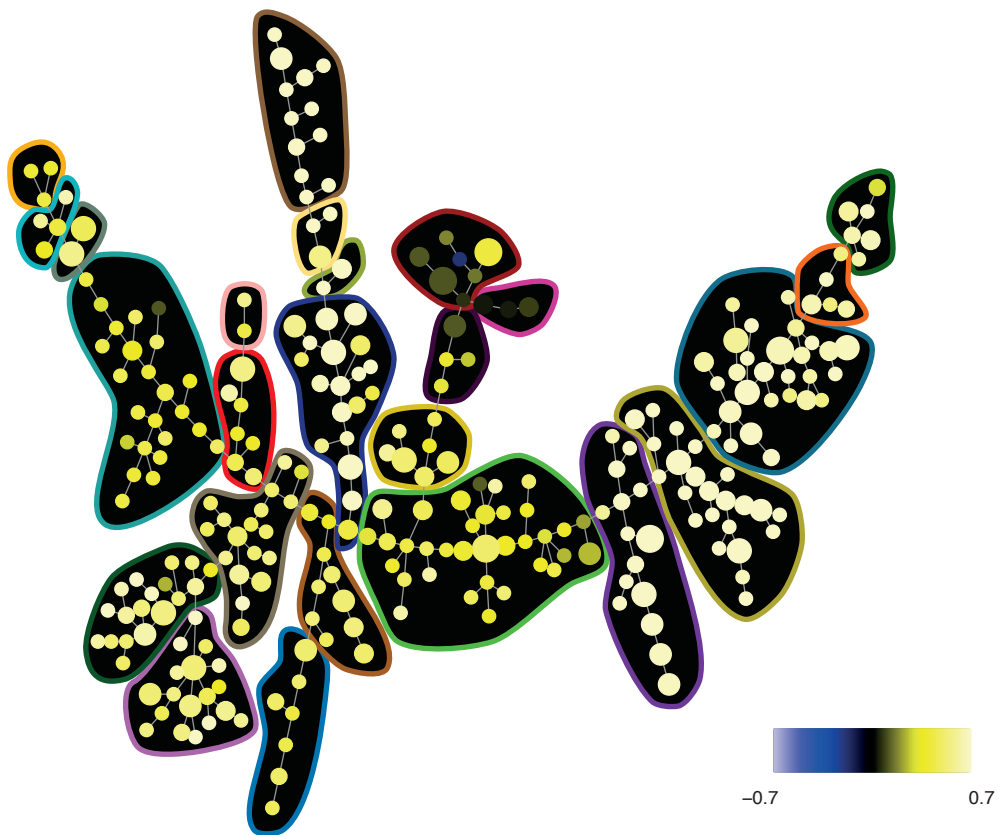

Figure S9B

165-pNFkB ---- Dasatinib+PVO4 vs Ref Ratio

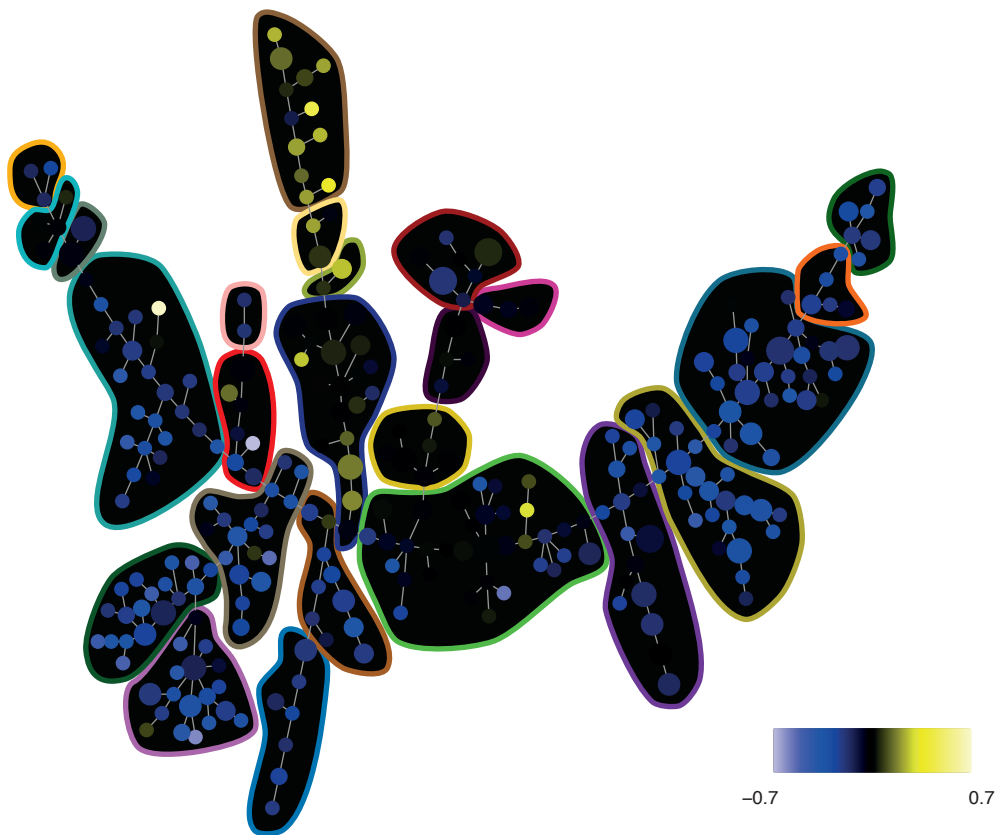

Figure S9B

165-pNFkB --- Dasatinib+Unstim vs Ref Ratio

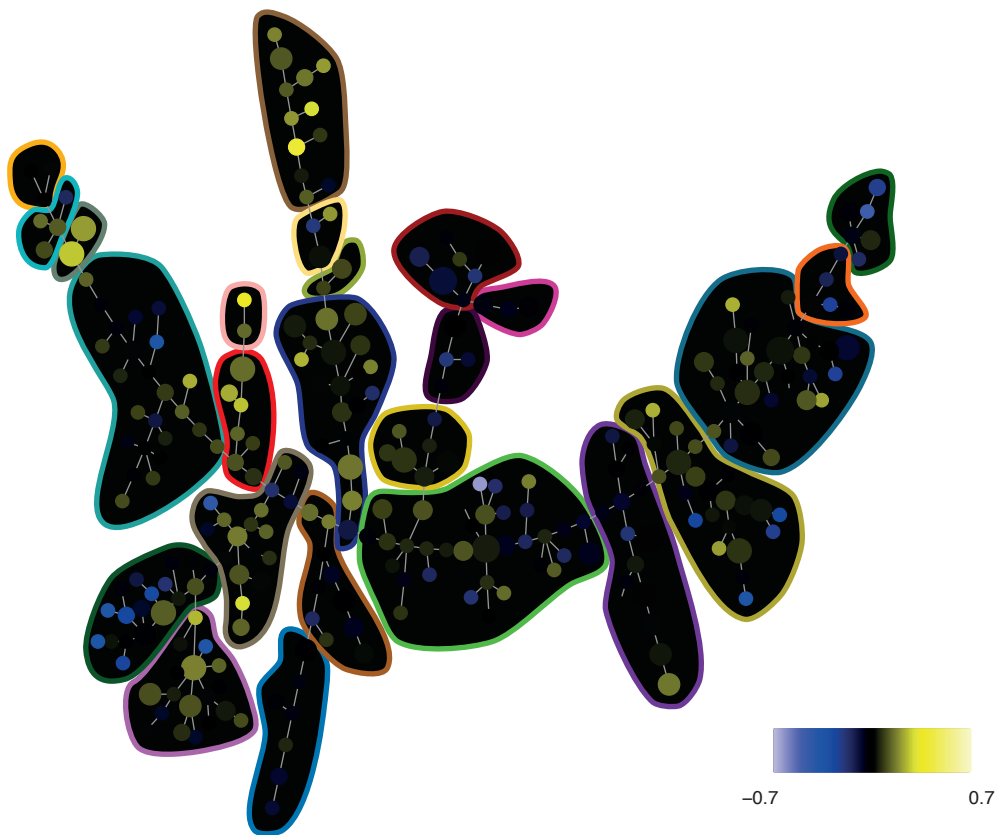

Figure S9B

166-IkBalpa ---- Dasatinib+BCR vs Ref Ratio

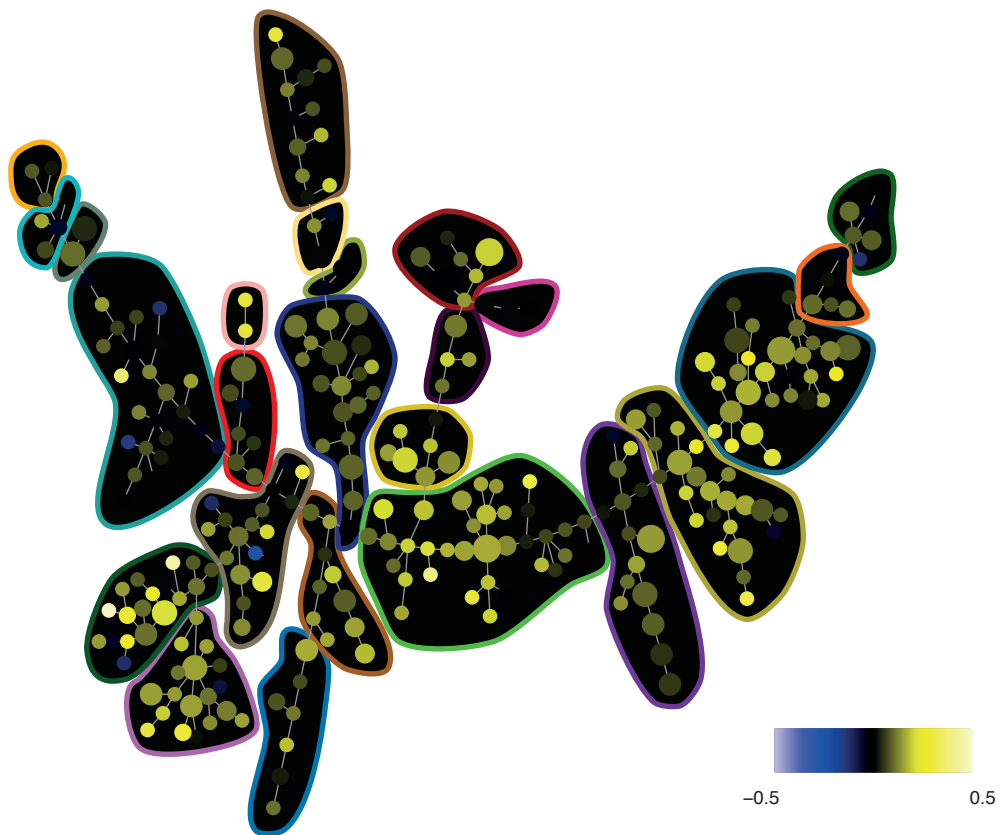

Figure S9B

166-1kBaIpha ---- Dasatinib+Flt3L vs Ref Ratio

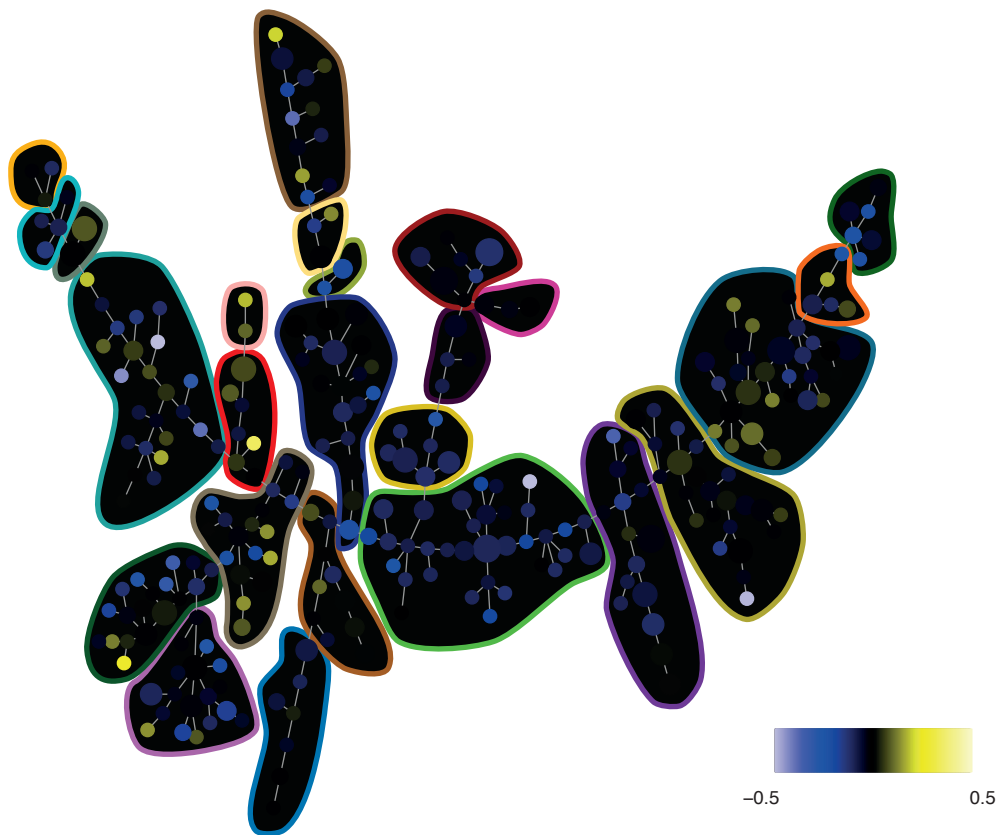

Figure S9B

166-IkBalpha --- Dasatinib+IL7 vs Ref Ratio

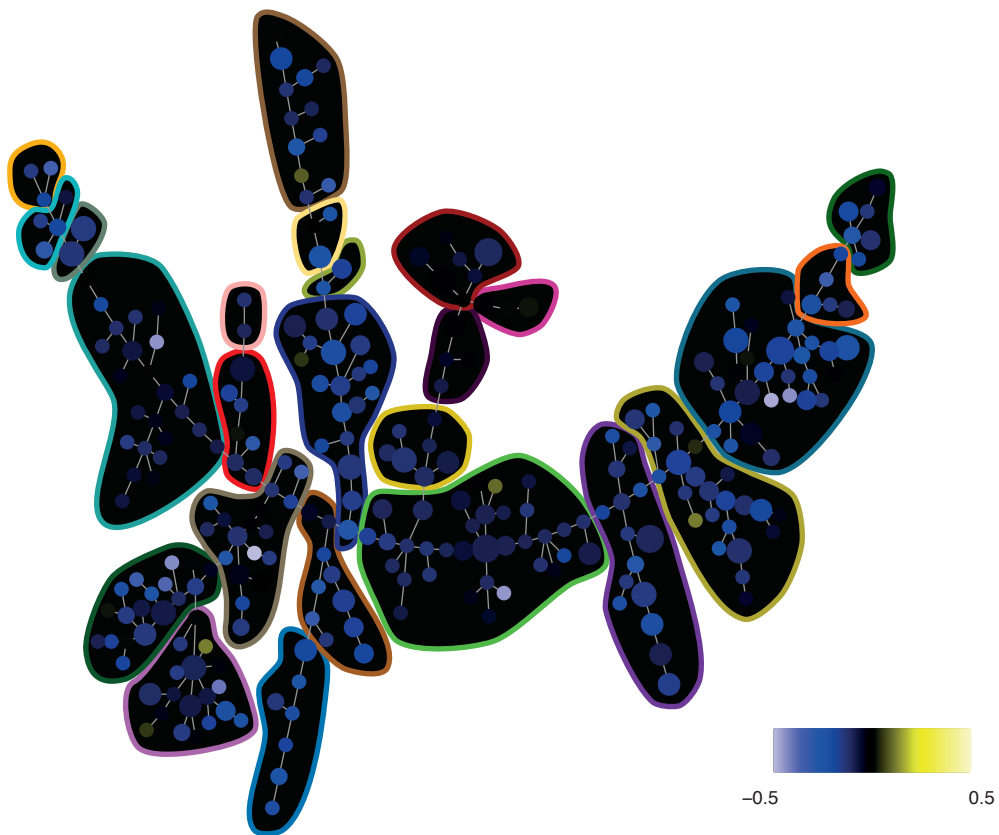

Figure S9B

166-IkBalpha --- Dasatinib+PMAiono vs Ref Ratio

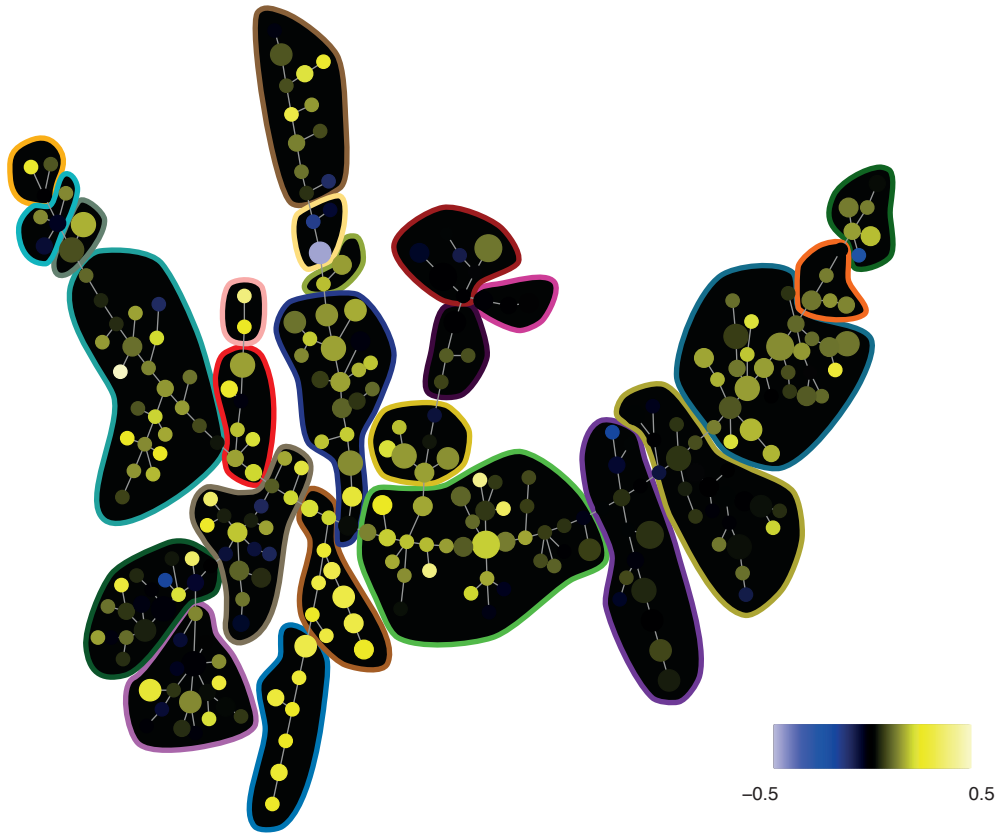



Figure S9B

166-IkBalpa ---- Dasatinib+PVO4 vs Ref Ratio

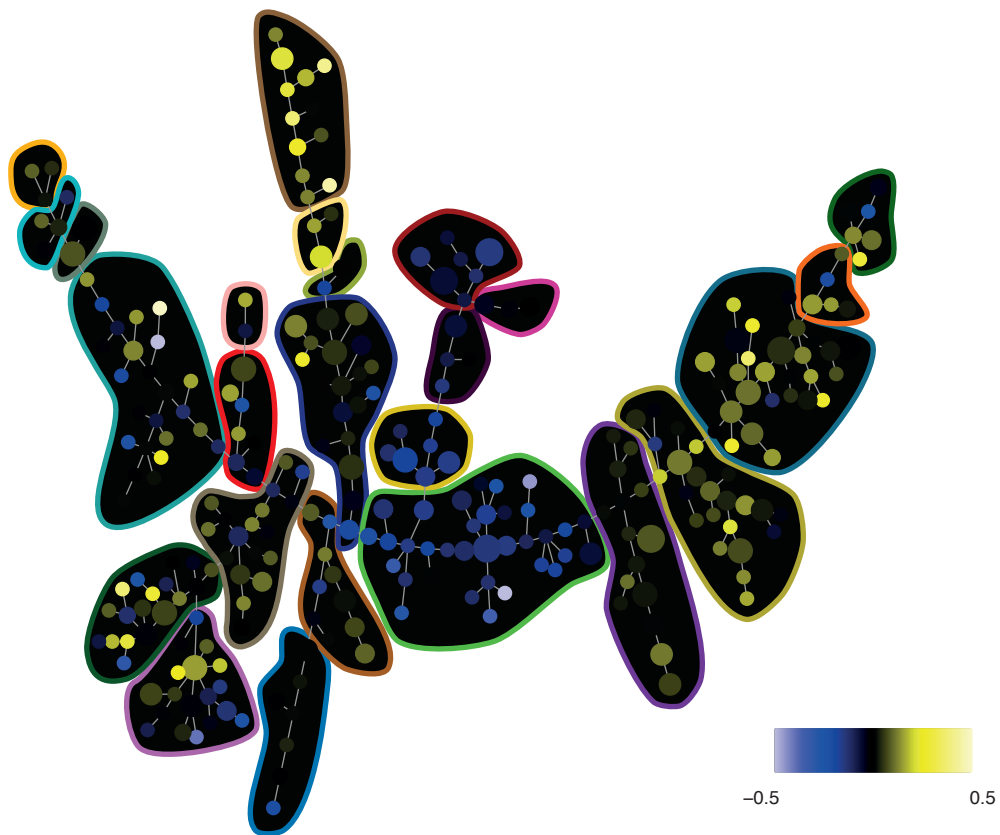

Figure S9B

166-IkBalpa ---- Dasatinib+Unstim vs Ref Ratio

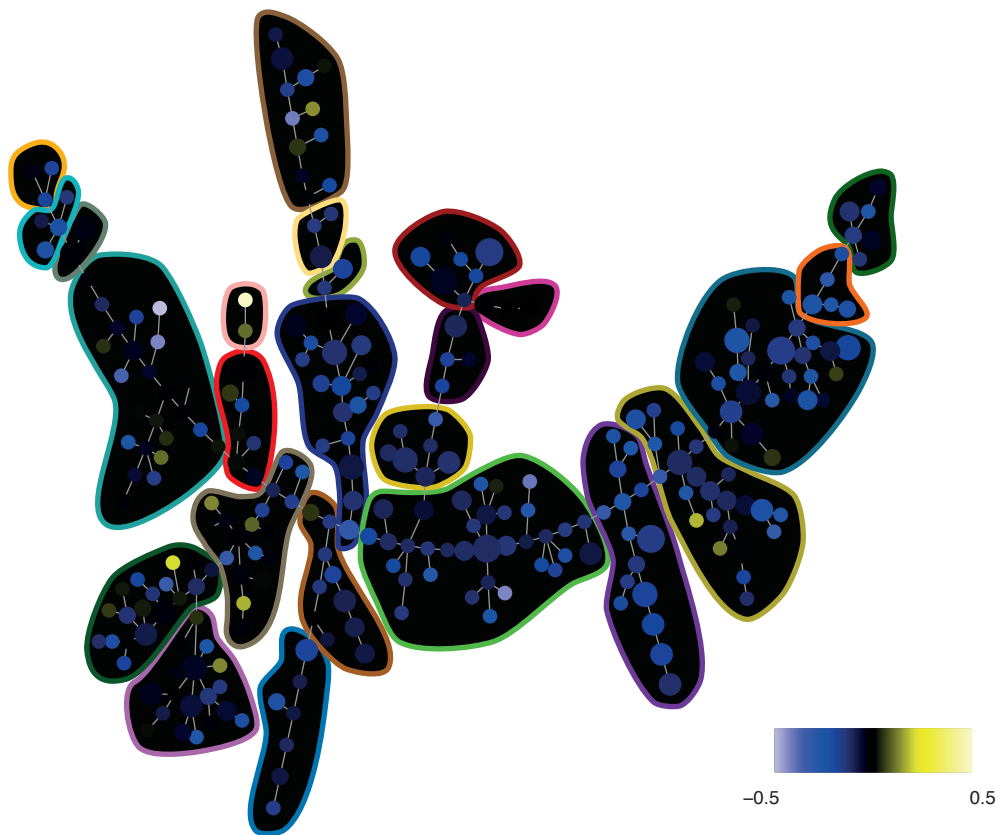

Figure S9B

168-pH3 --- Dasatinib+BCR vs Ref Ratio

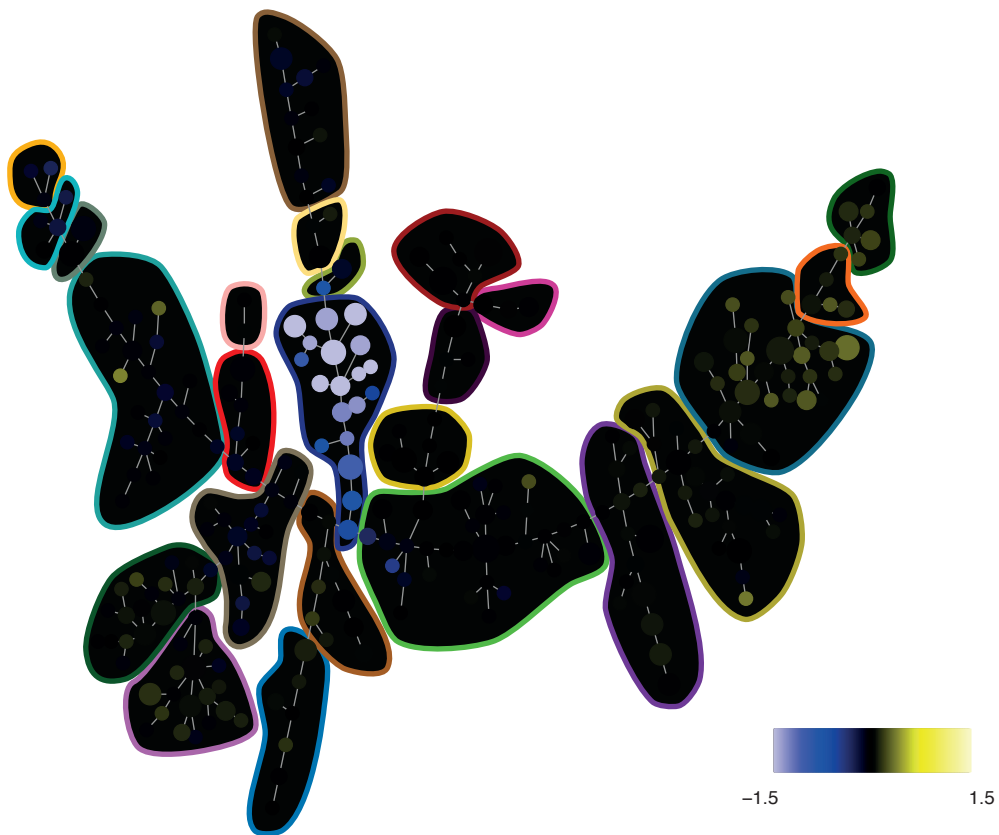

Figure S9B

168-pH3 ---- Dasatinib+Flt3L vs Ref Ratio

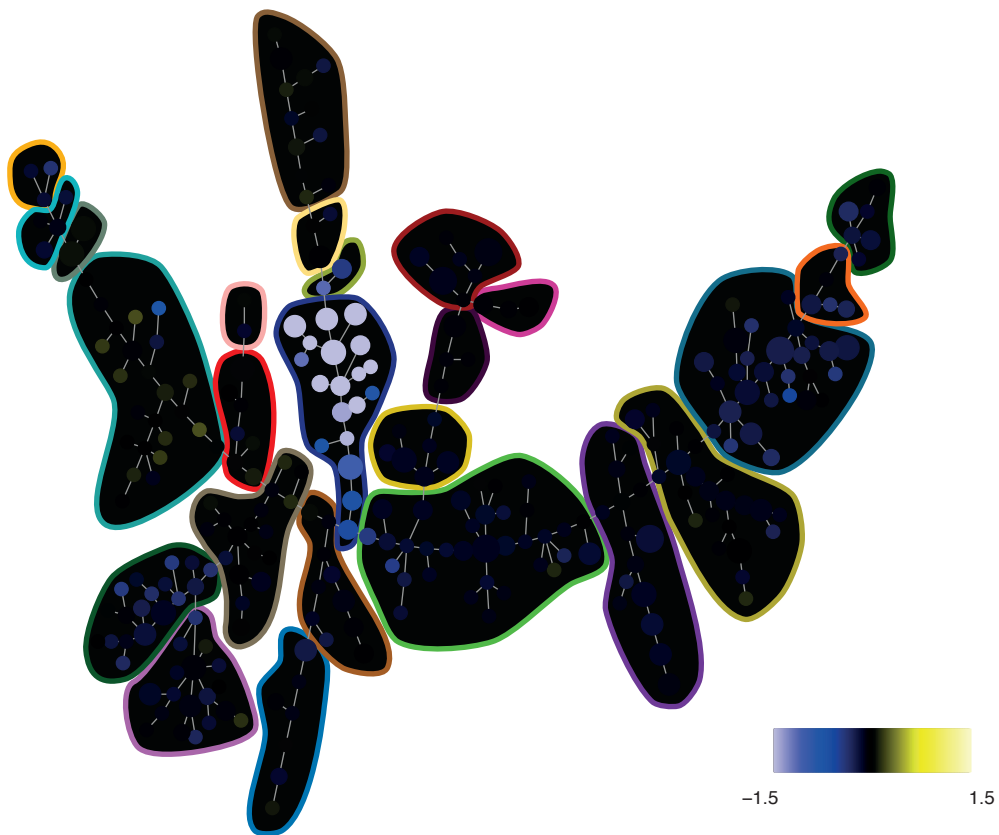

Figure S9B

168-pH3 --- Dasatinib+IL7 vs Ref Ratio

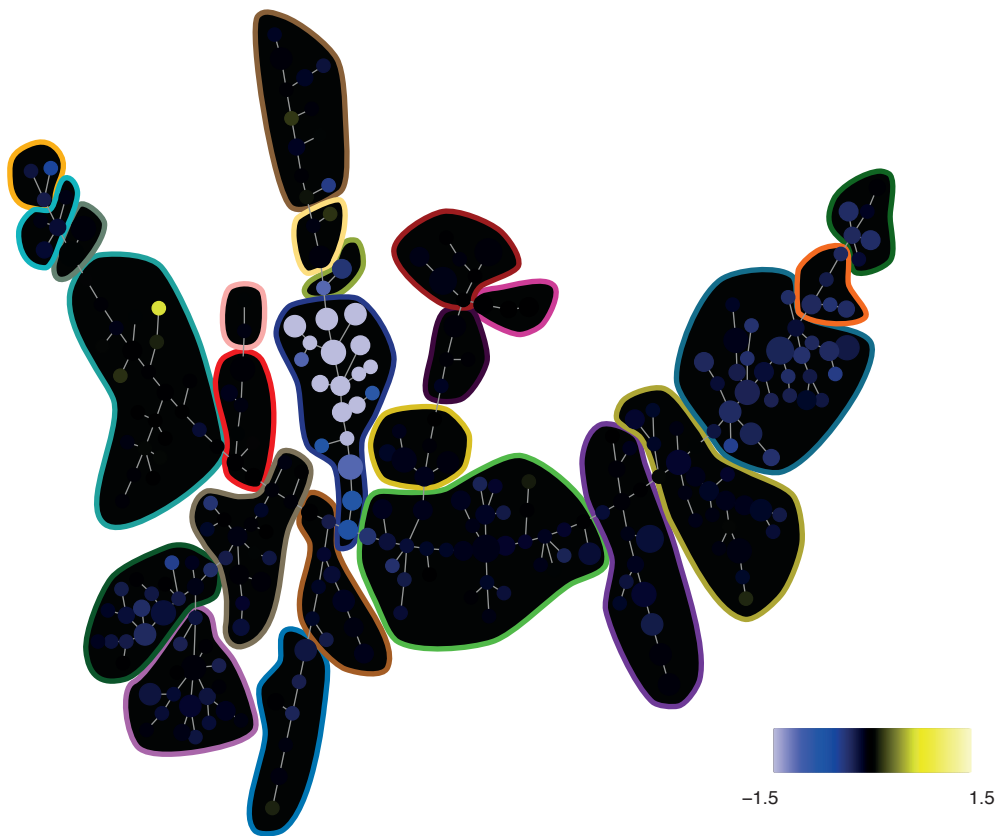

Figure S9B

168-pH3 --- Dasatinib+PMAiono vs Ref Ratio

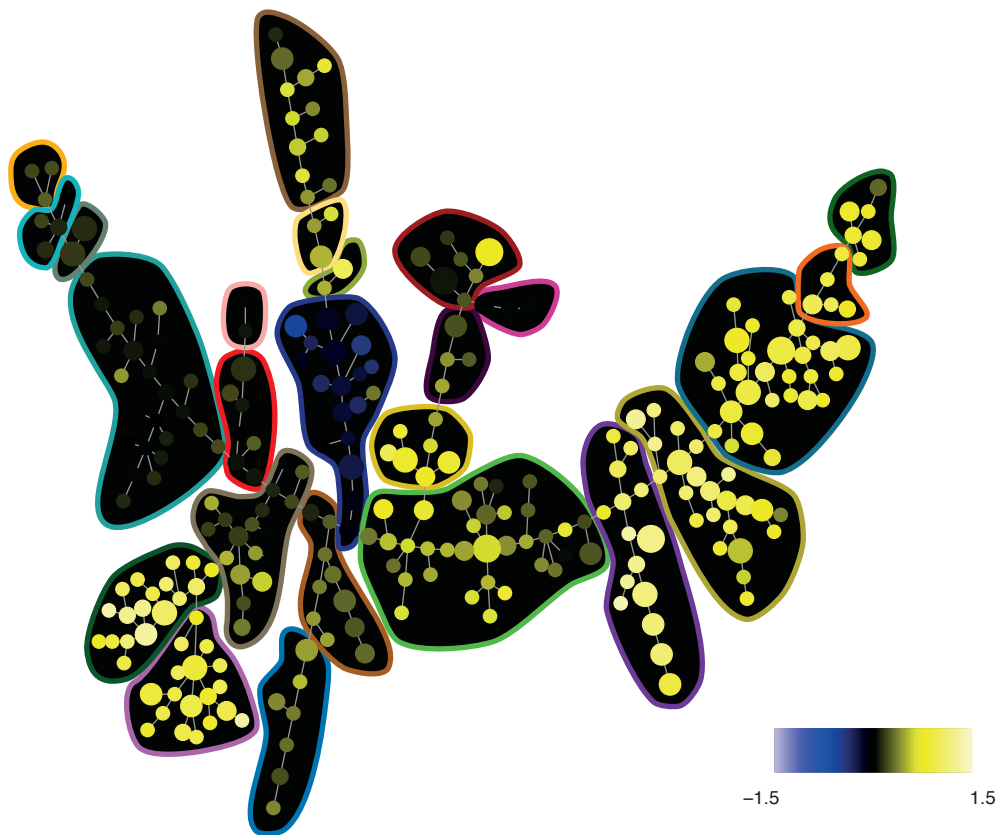

Figure S9B

168-pH3 ---- Dasatinib+PVO4 vs Ref Ratio

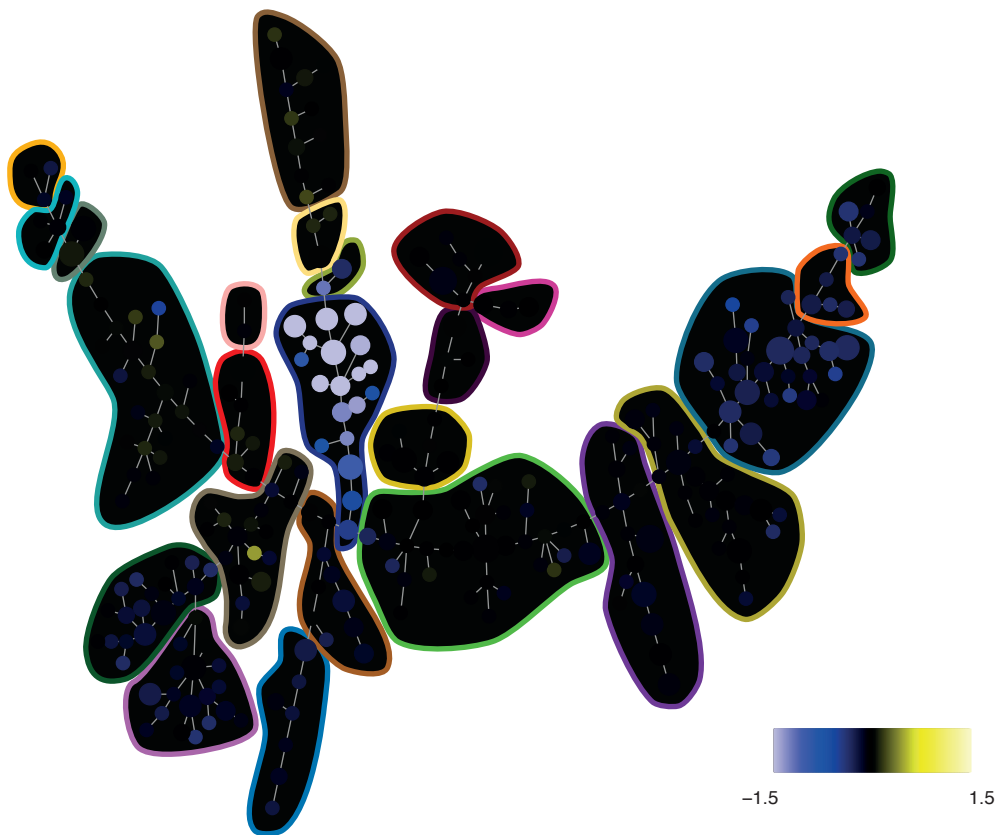

Figure S9B

168-pH3 --- Dasatinib+Unstim vs Ref Ratio

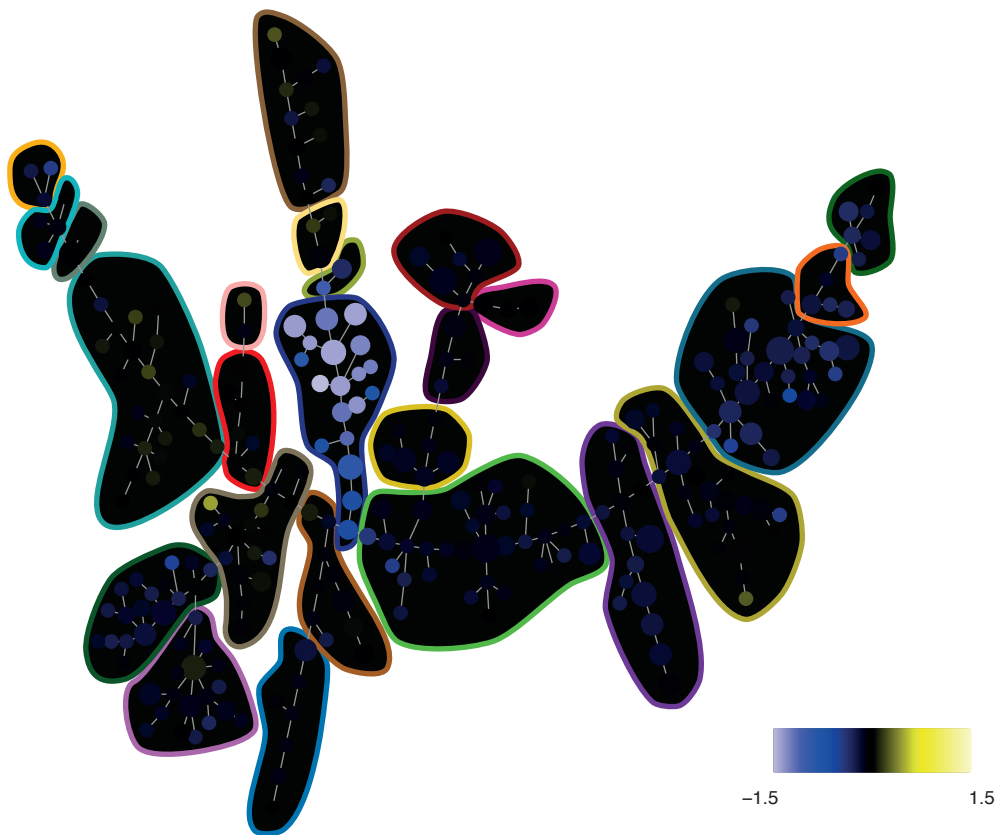



Figure S9B

169-pP38 ---- Dasatinib+BCR vs Ref Ratio

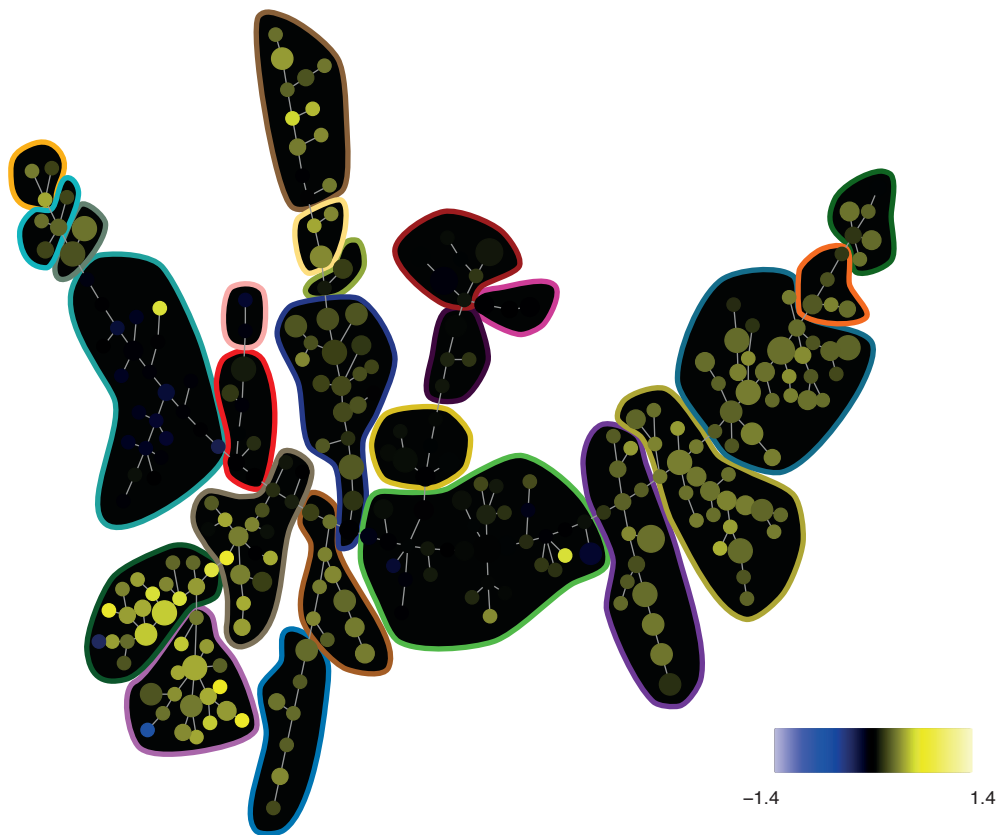

Figure S9B

169-pP38 --- Dasatinib+Fit3L vs Ref Ratio

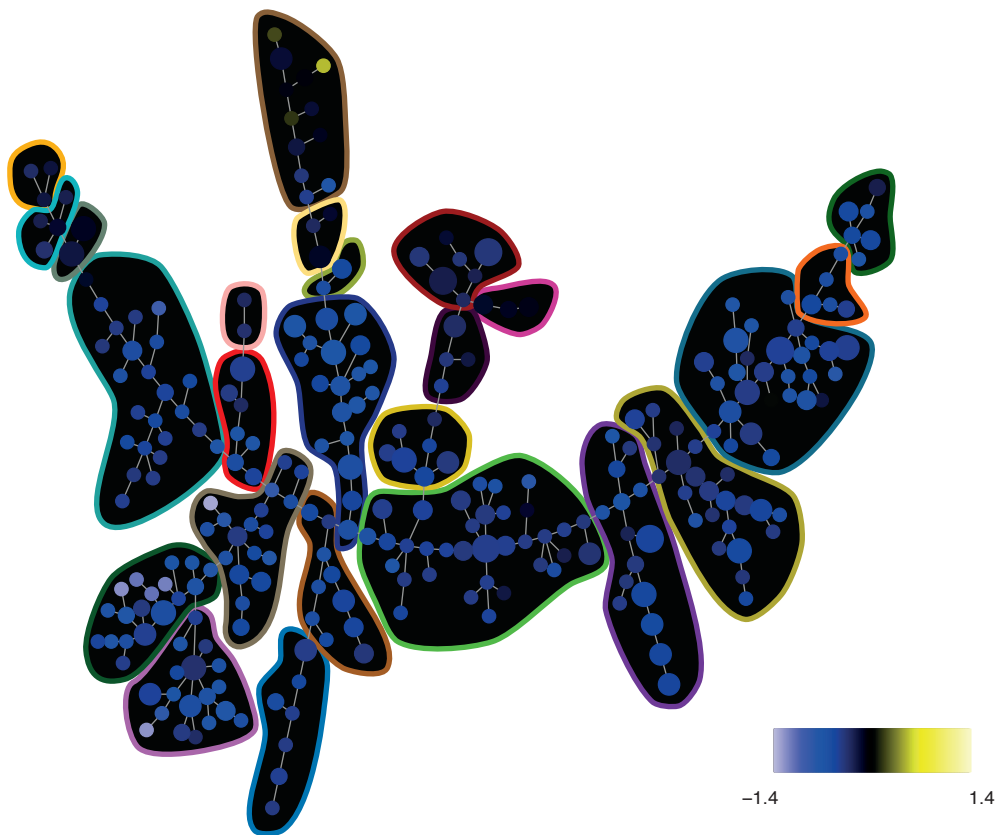

Figure S9B

169-pP38 --- Dasatinib+IL7 vs Ref Ratio

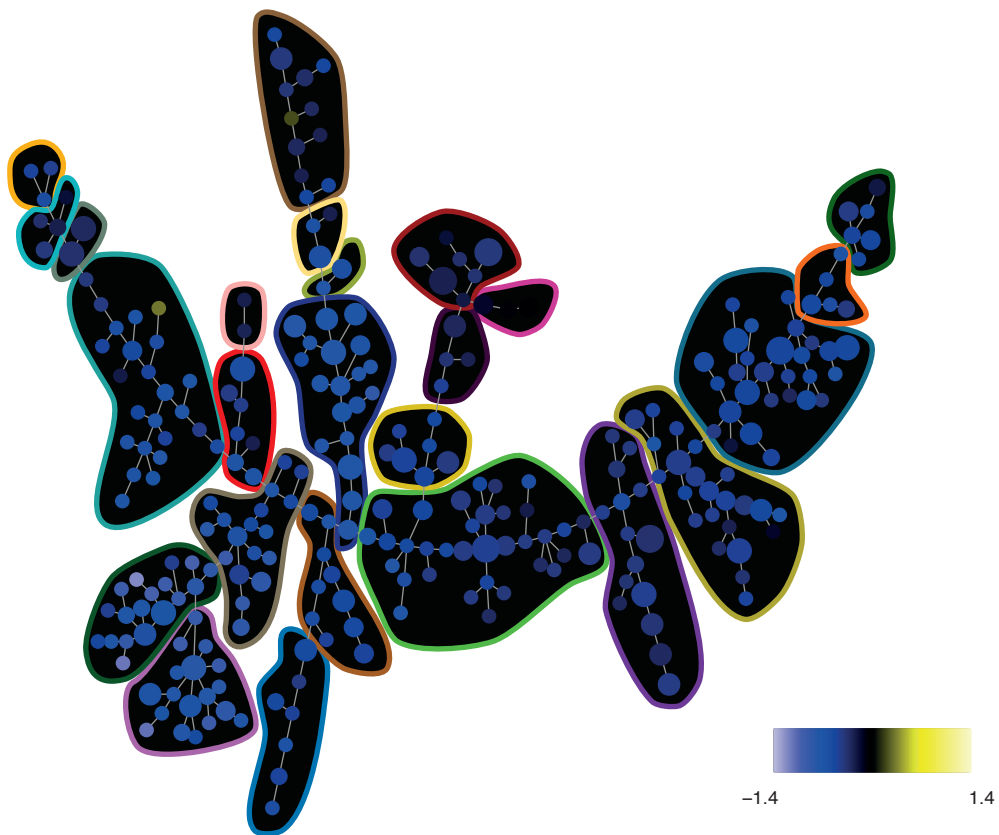

Figure S9B

169-pP38 — Dasatinib+PMAiono vs Ref Ratio

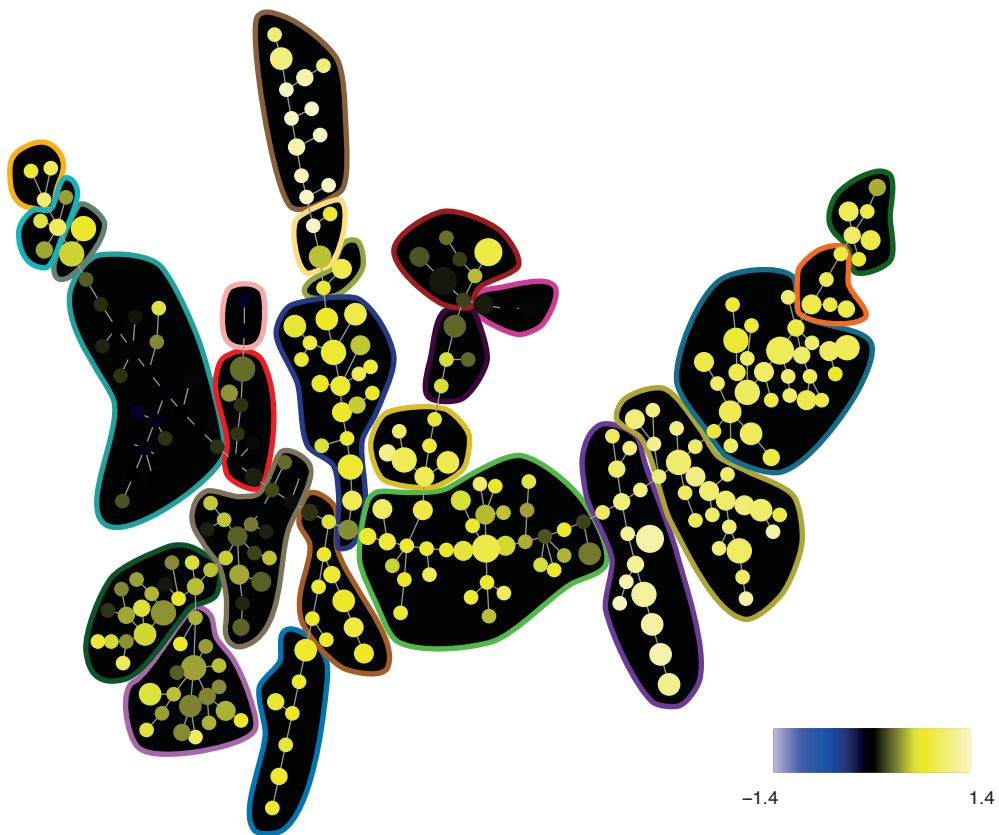

Figure S9B

169-pP38 ---- Dasatinib+PVO4 vs Ref Ratio

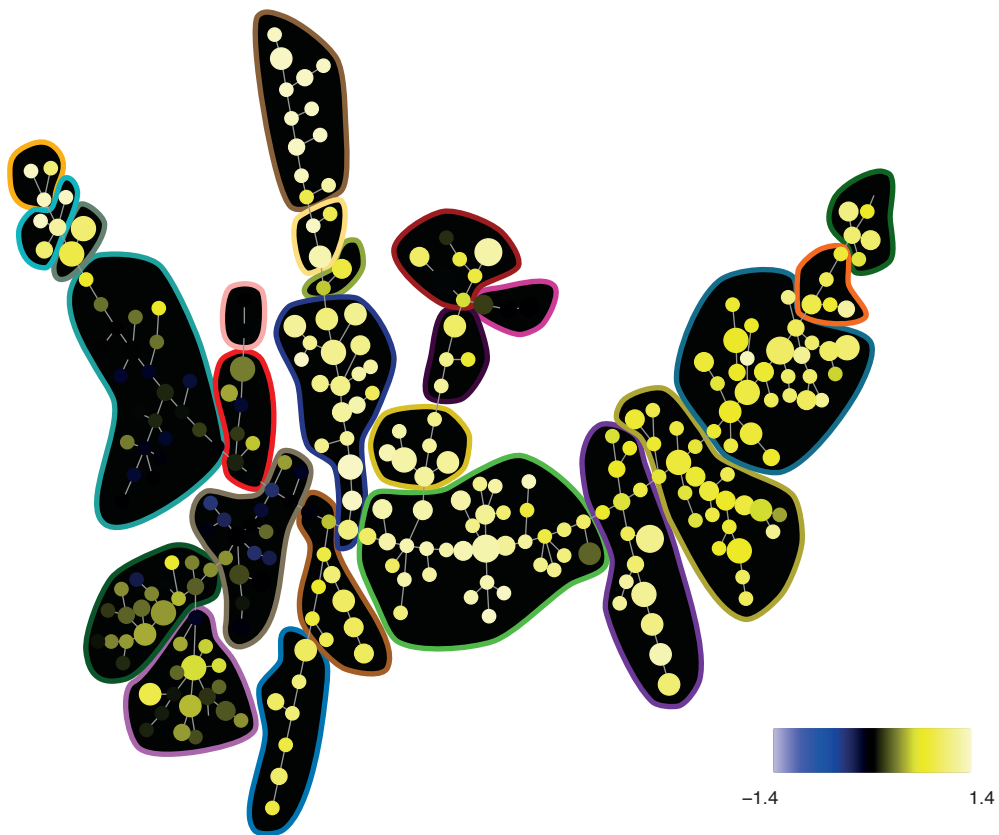

Figure S9B

169-pP38 --- Dasatinib+Unstim vs Ref Ratio

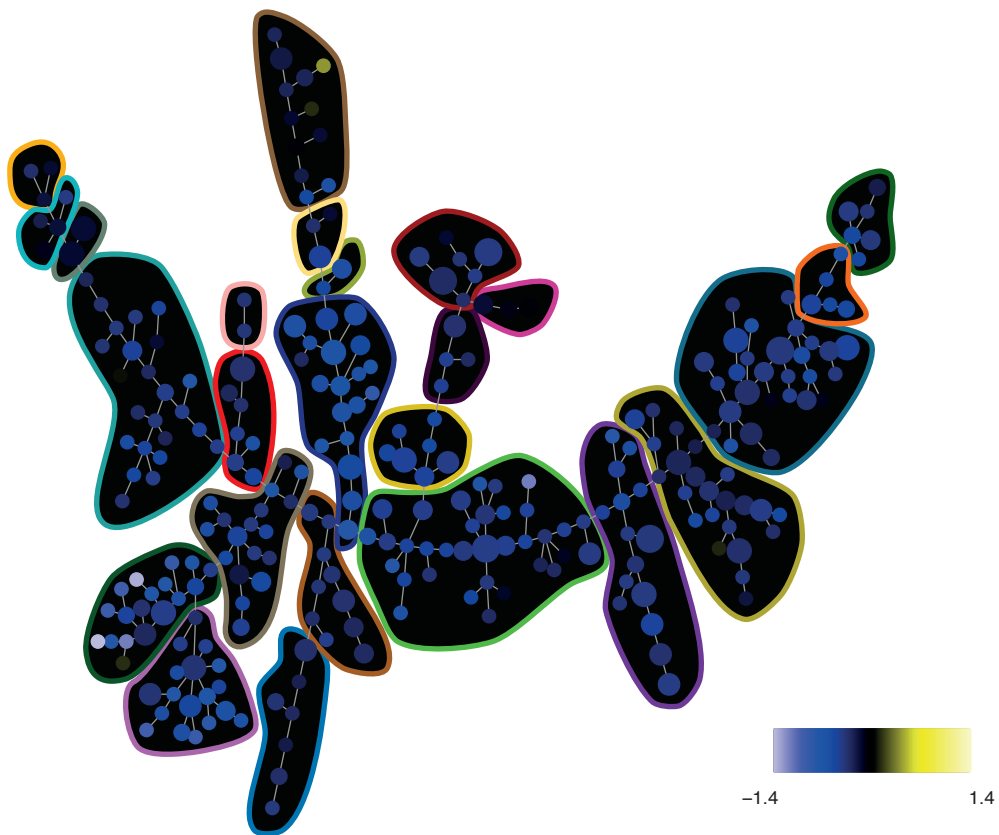

Figure S9B

171-pBtk/Itk --- Dasatinib+BCR vs Ref Ratio

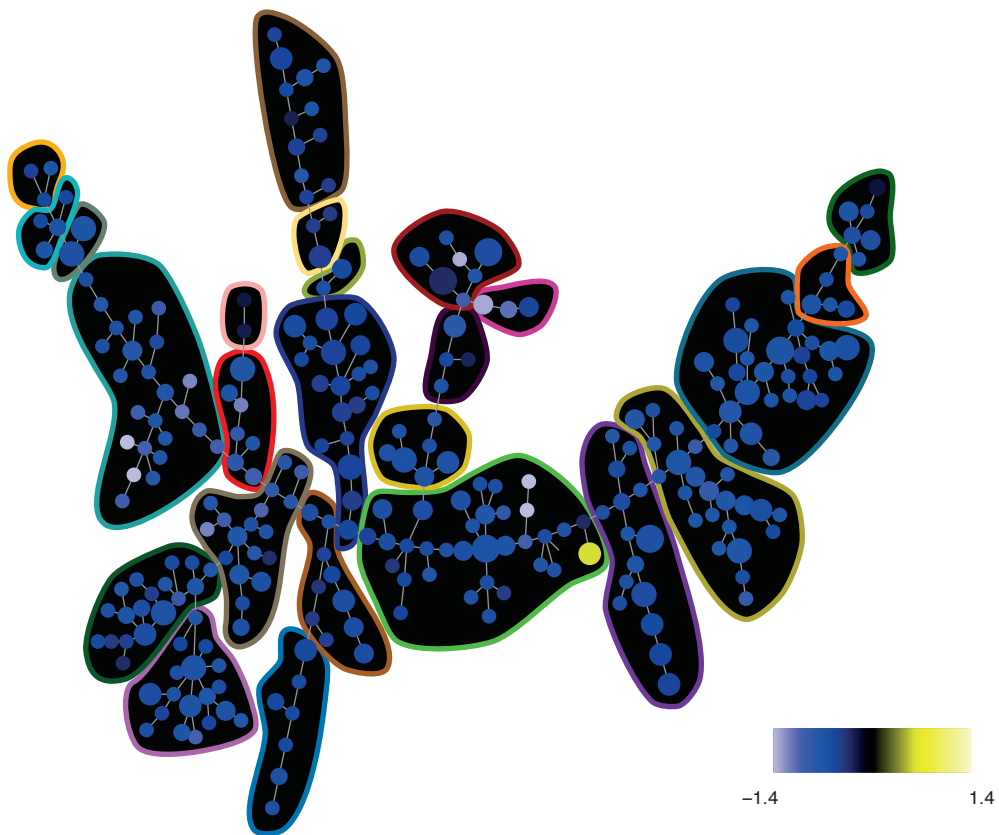

Figure S9B

171-pBtk/Itk --- Dasatinib+Flt3L vs Ref Ratio

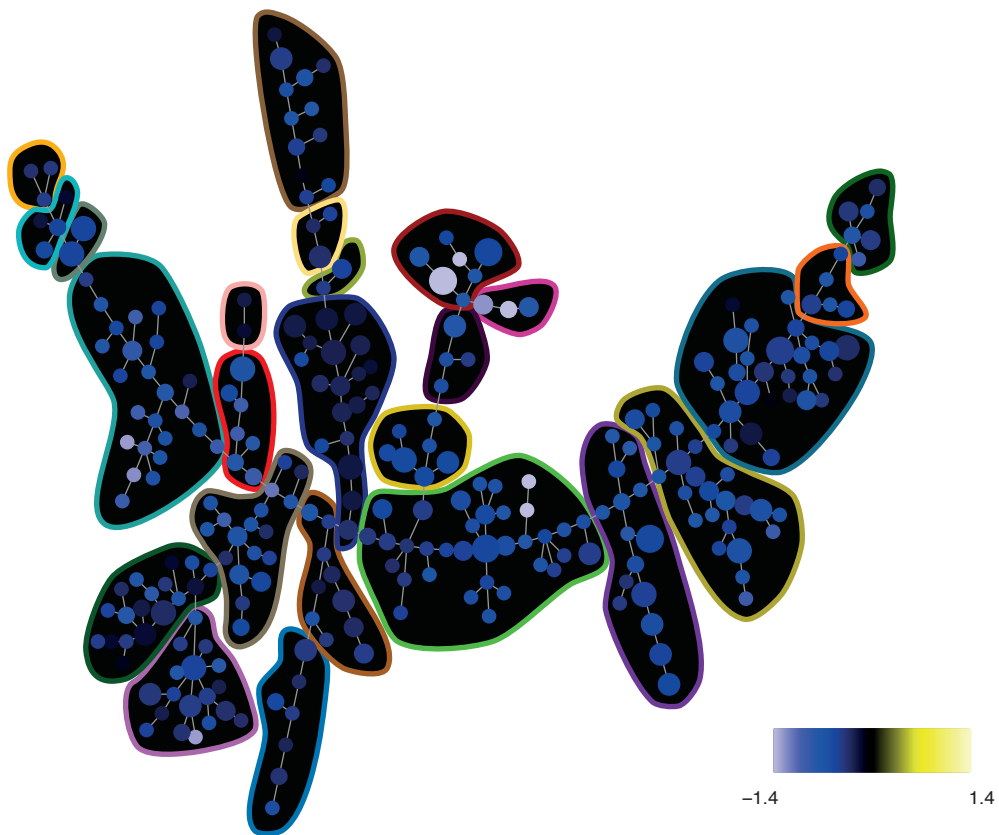



Figure S9B

171-pBtk/Itk — Dasatinib+IL7 vs Ref Ratio

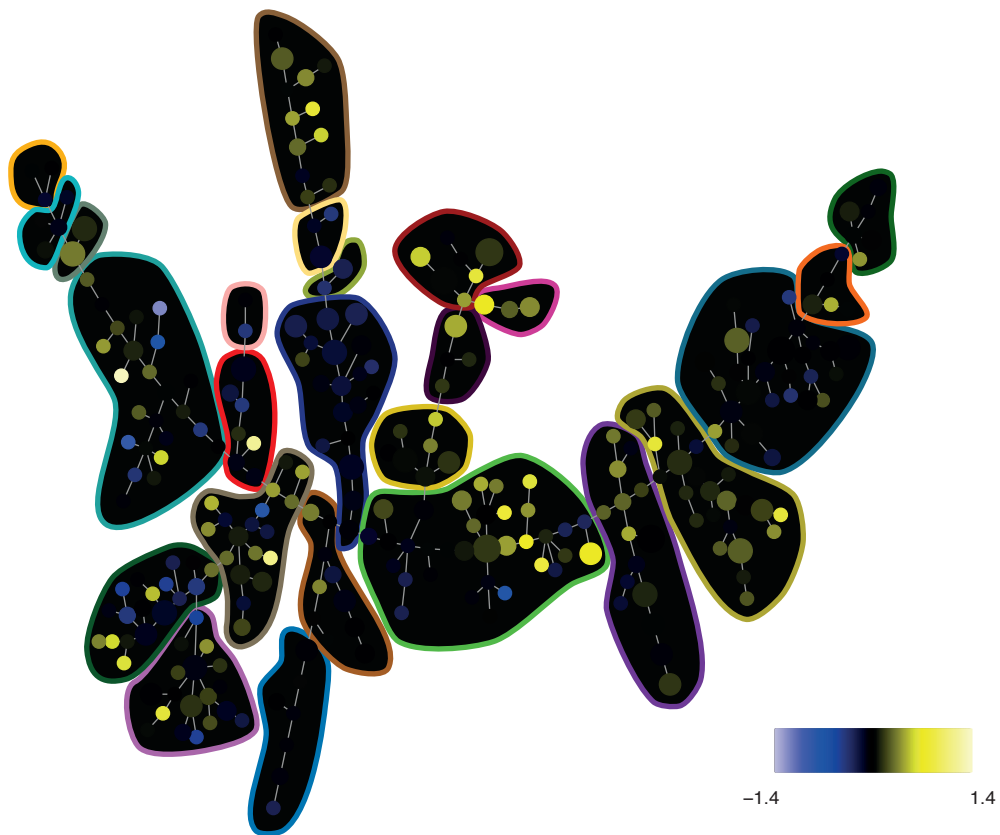

Figure S9B

171-pBtk/Itk ---- Dasatinib+PMAiono vs Ref Ratio

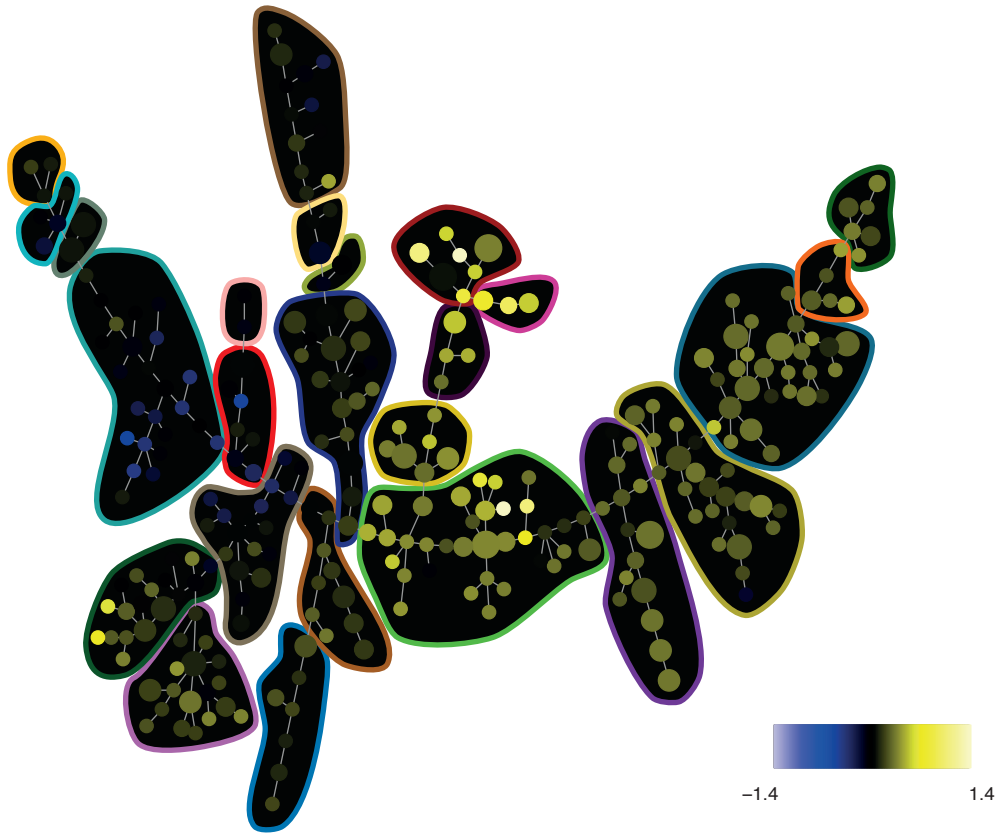

Figure S9B

171-pBtk/Itk — Dasatinib+PVO4 vs Ref Ratio

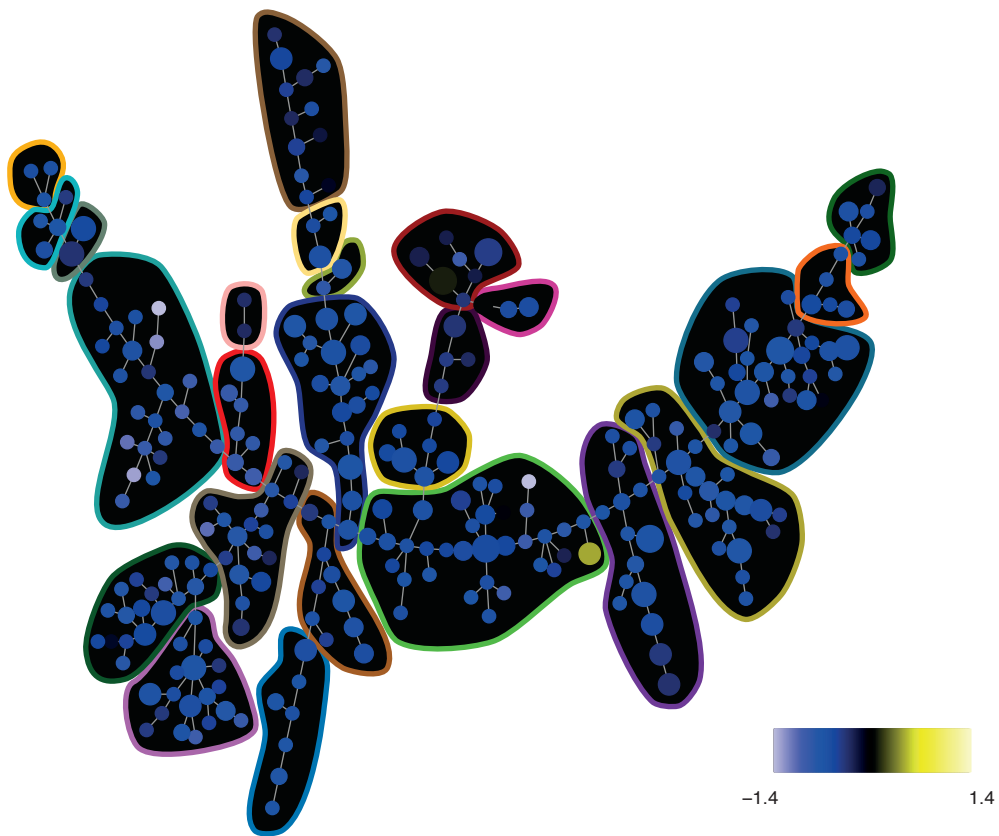

Figure S9B

171-pBtk/Itk ---- Dasatinib+Unstim vs Ref Ratio

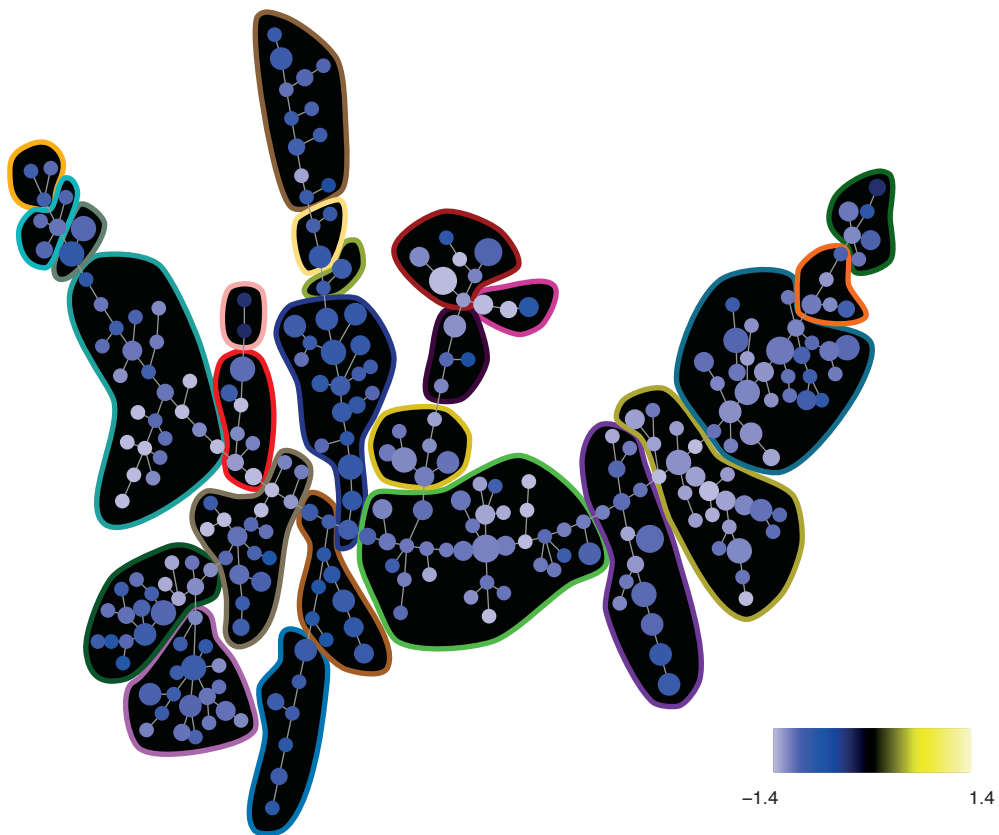

Figure S9B

172-pS6 ---- Dasatinib+BCR vs Ref Ratio

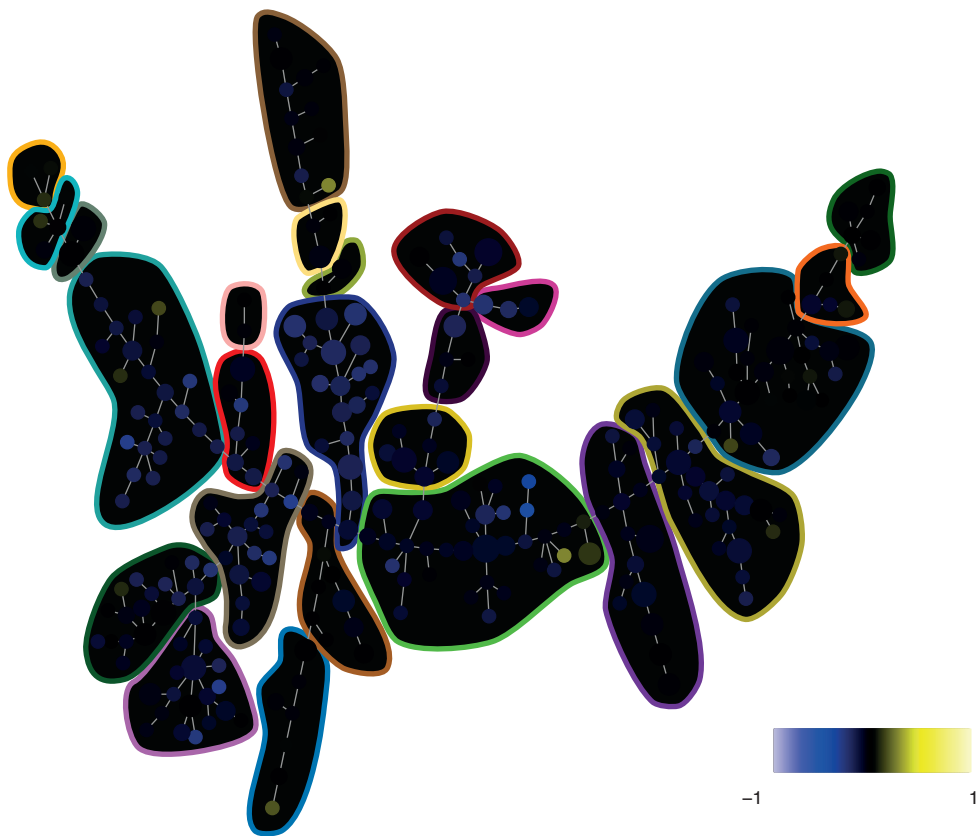

Figure S9B

172-pS6 ---- Dasatinib+Flt3L vs Ref Ratio

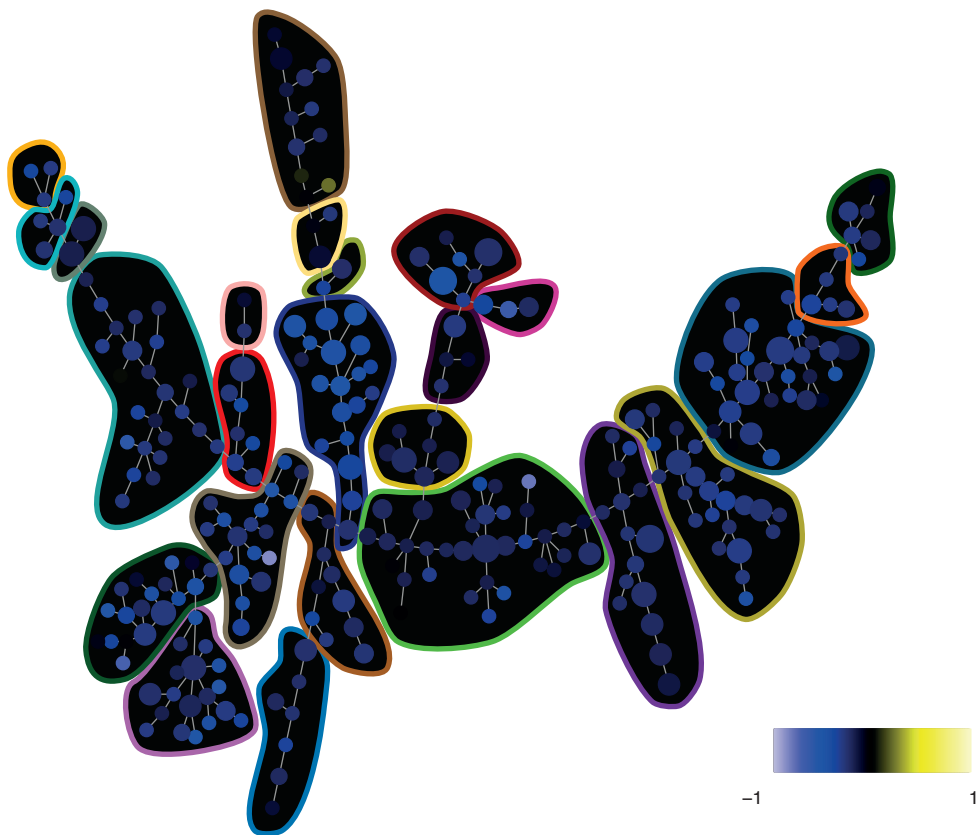

Figure S9B

172-pS6 ---- Dasatinib+IL7 vs Ref Ratio

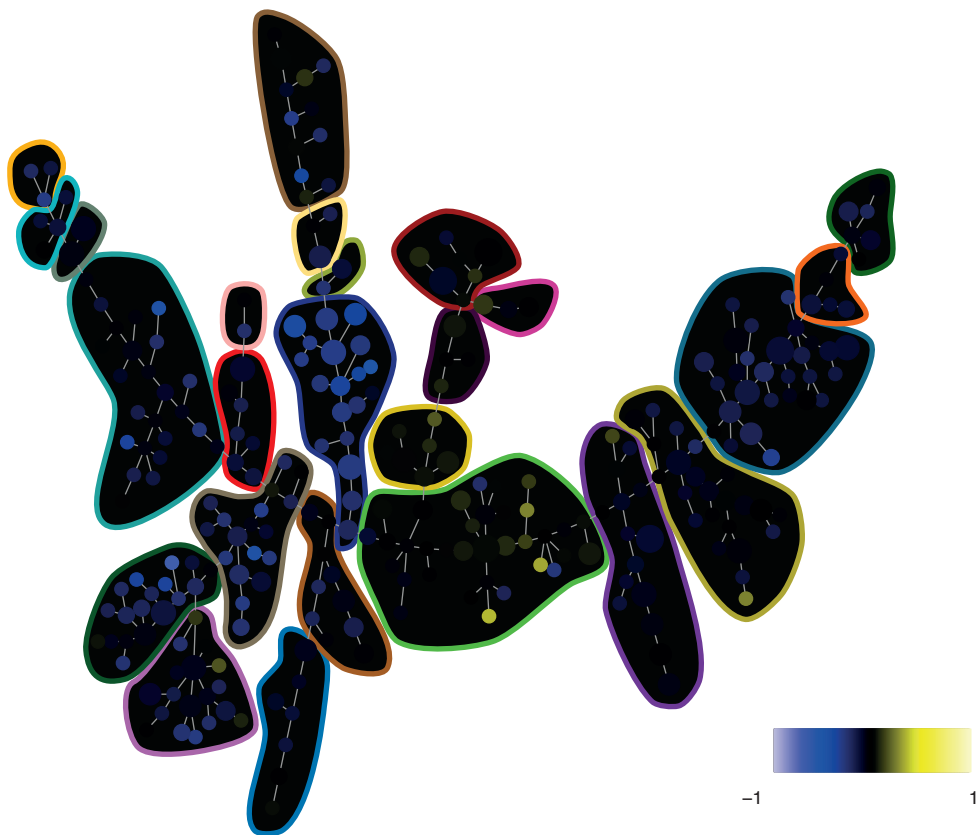

Figure S9B

172-pS6 --- Dasatinib+PMAiono vs Ref Ratio

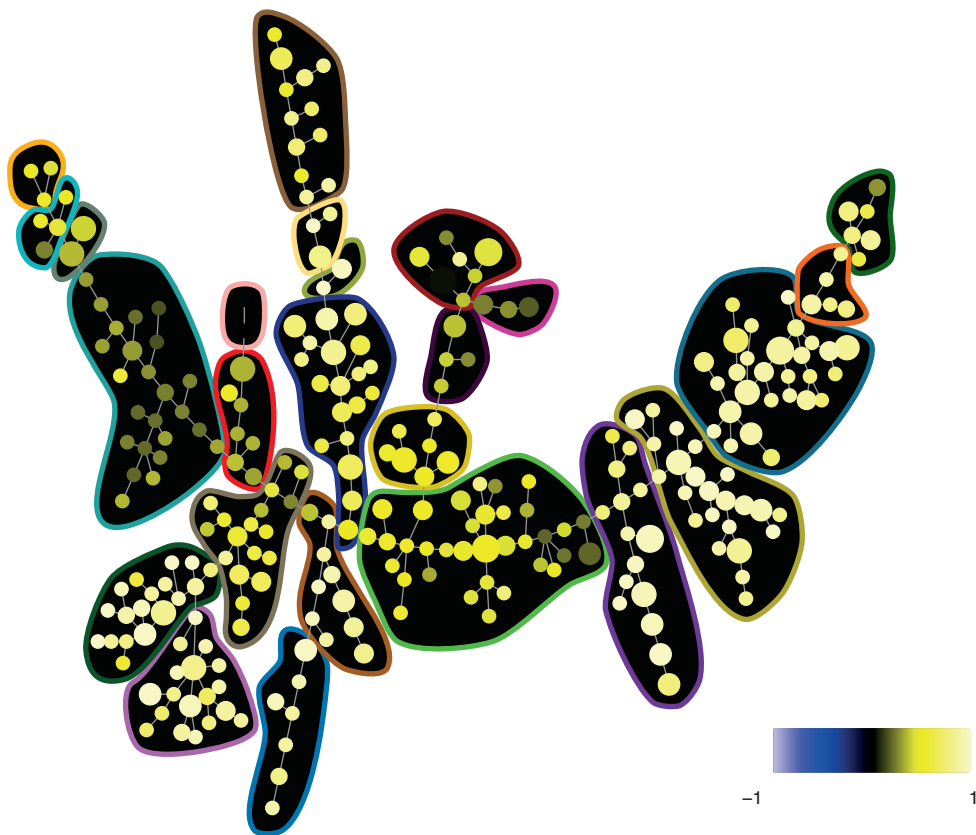



Figure S9B

172-pS6 ---- Dasatinib+PVO4 vs Ref Ratio

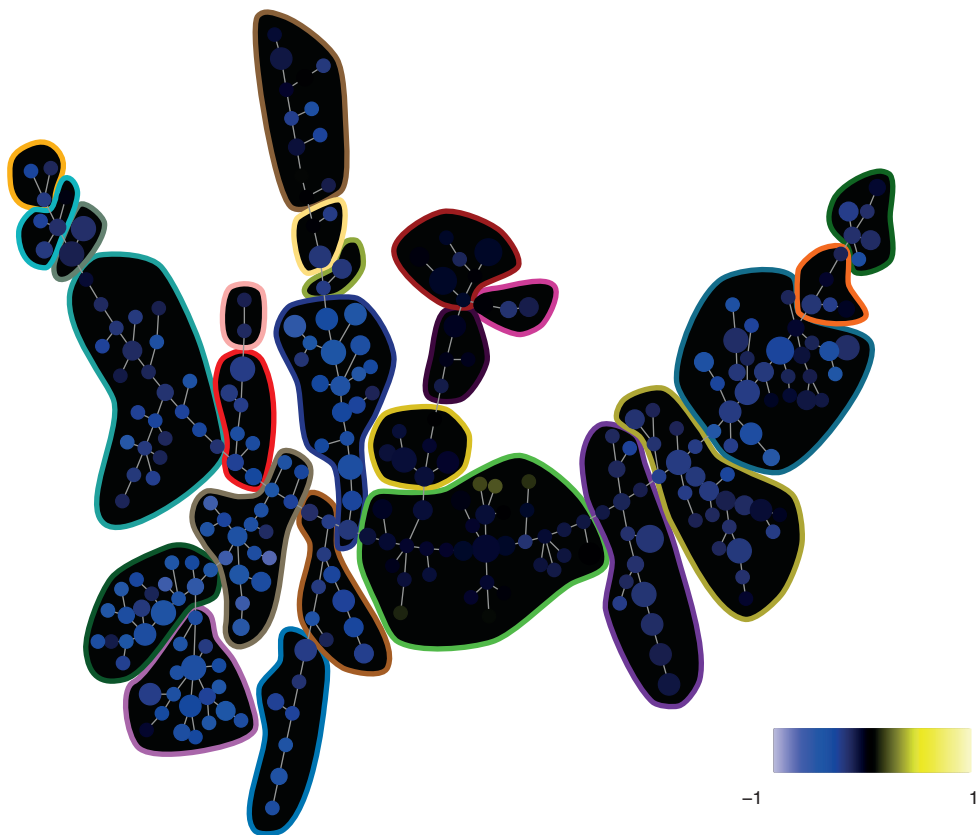

Figure S9B

172-pS6 --- Dasatinib+Unstim vs Ref Ratio

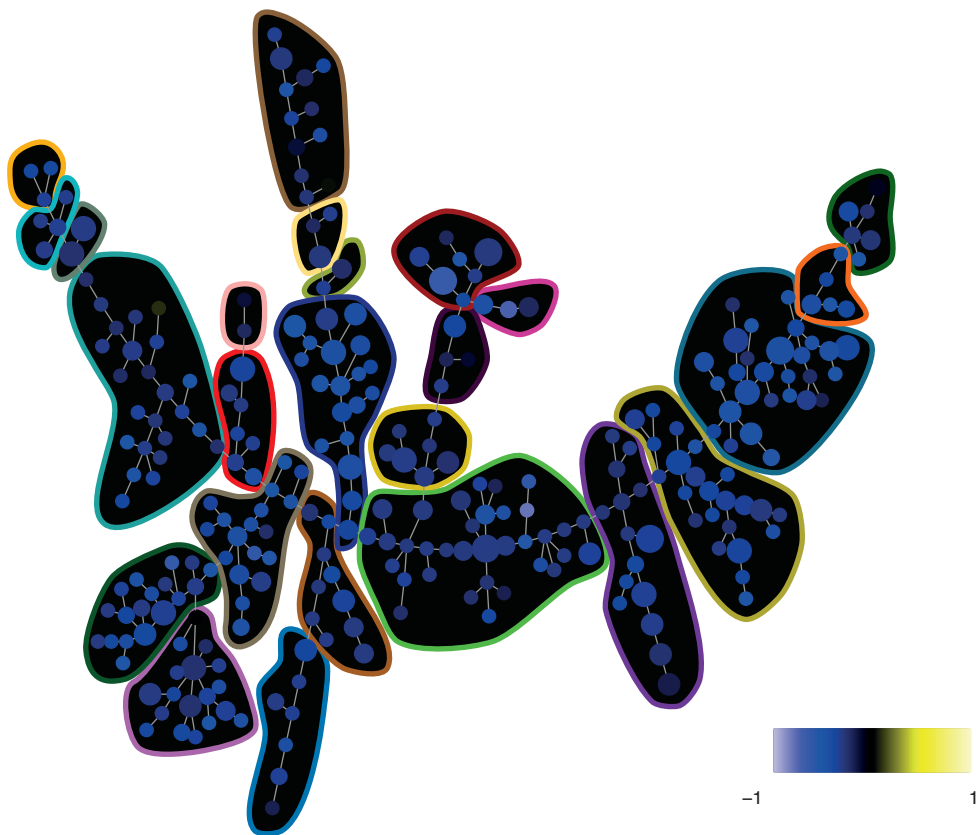

Figure S9B

174-pSrcFK ---- Dasatinib+BCR vs Ref Ratio

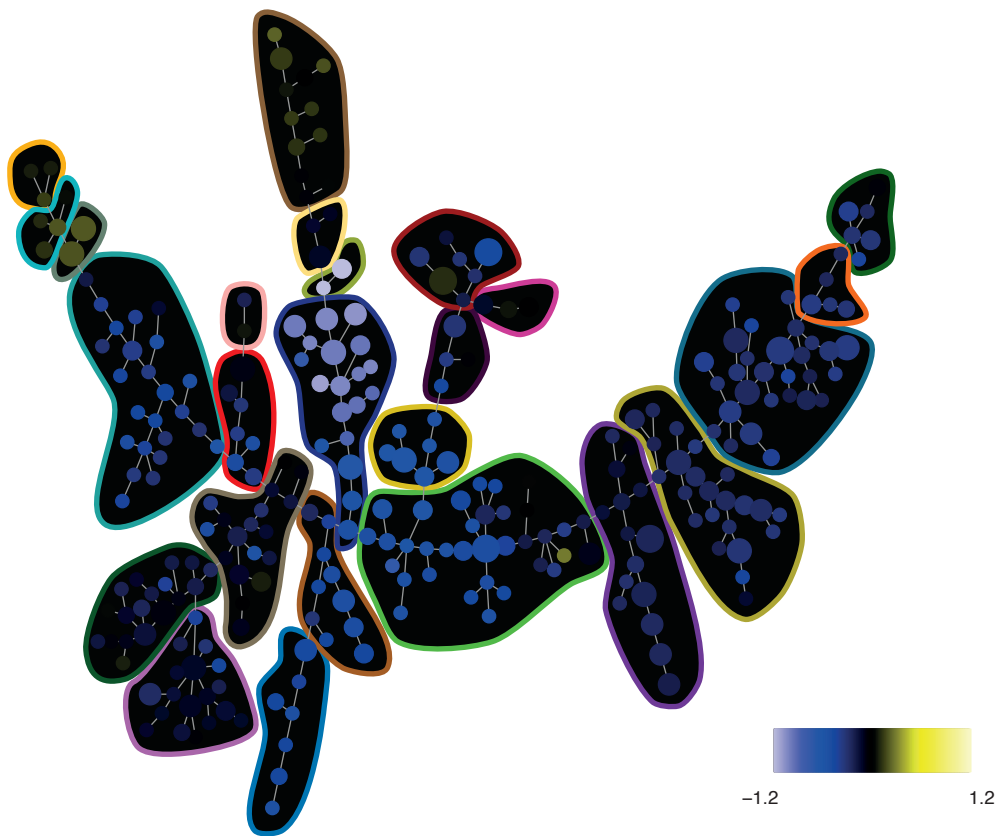

Figure S9B

174-pSrcFK --- Dasatinib+Flt3L vs Ref Ratio

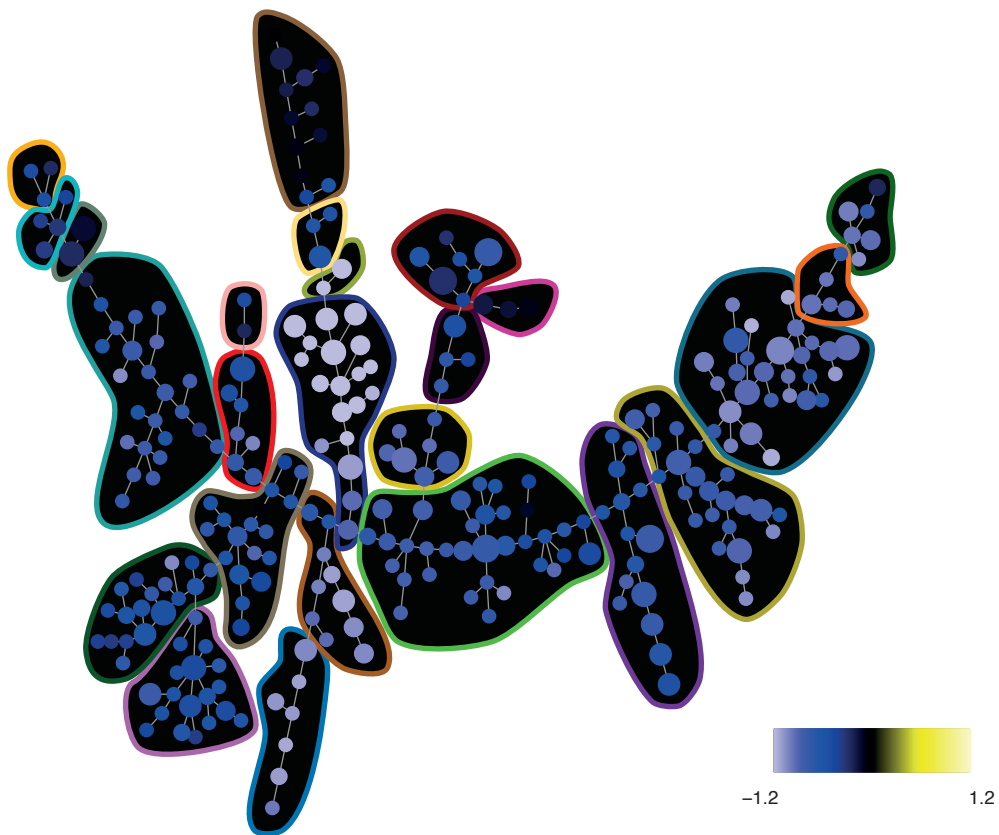

Figure S9B

174-pSrcFK — Dasatinib+IL7 vs Ref Ratio

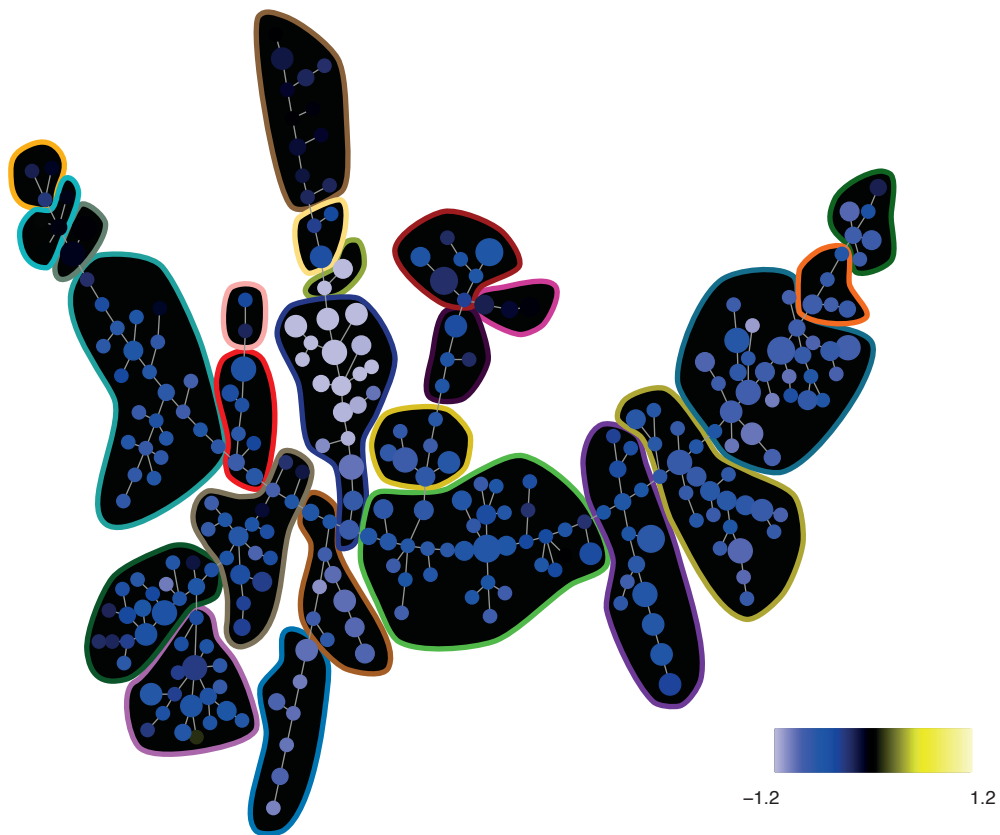

Figure S9B

174-pSrcFK ---- Dasatinib+PMAiono vs Ref Ratio

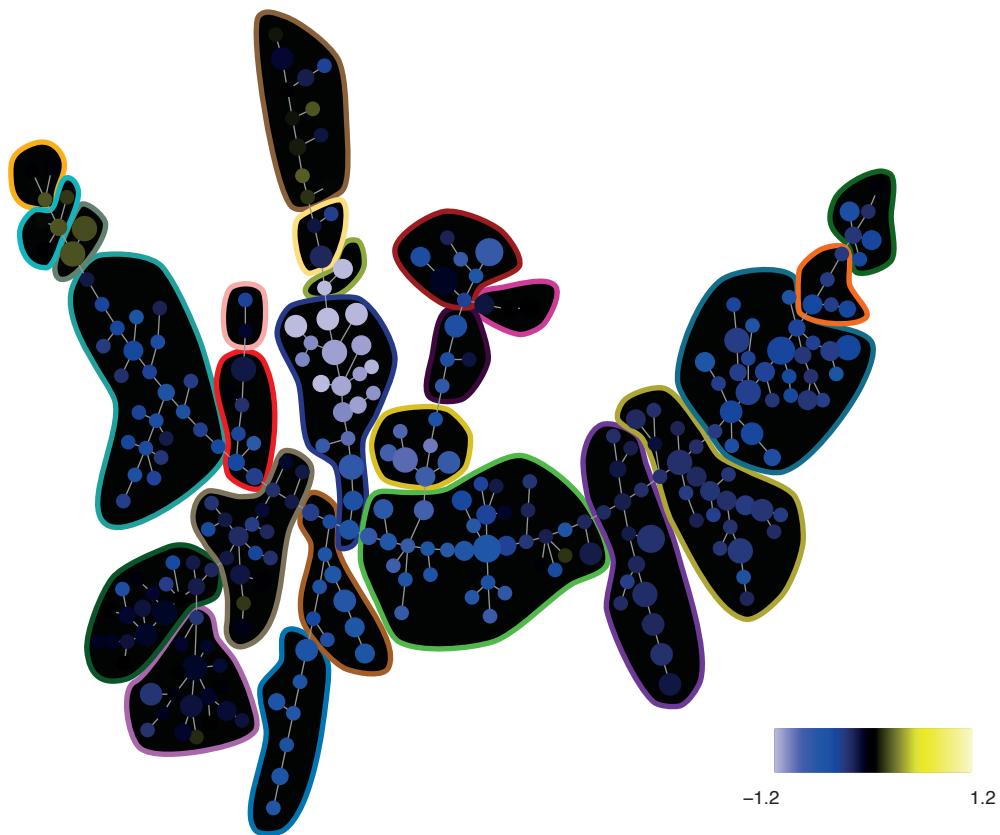

Figure S9B

174-pSrcFK — Dasatinib+PVO4 vs Ref Ratio

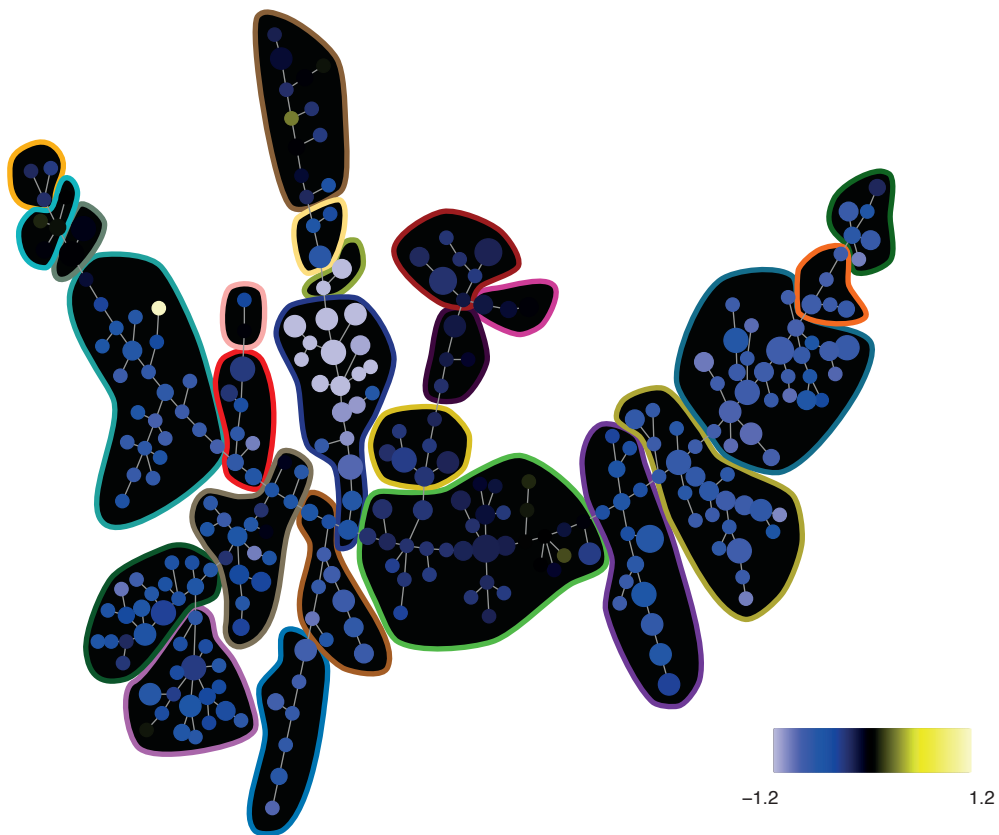

Figure S9B

174-pSrcFK ---- Dasatinib+Unstim vs Ref Ratio

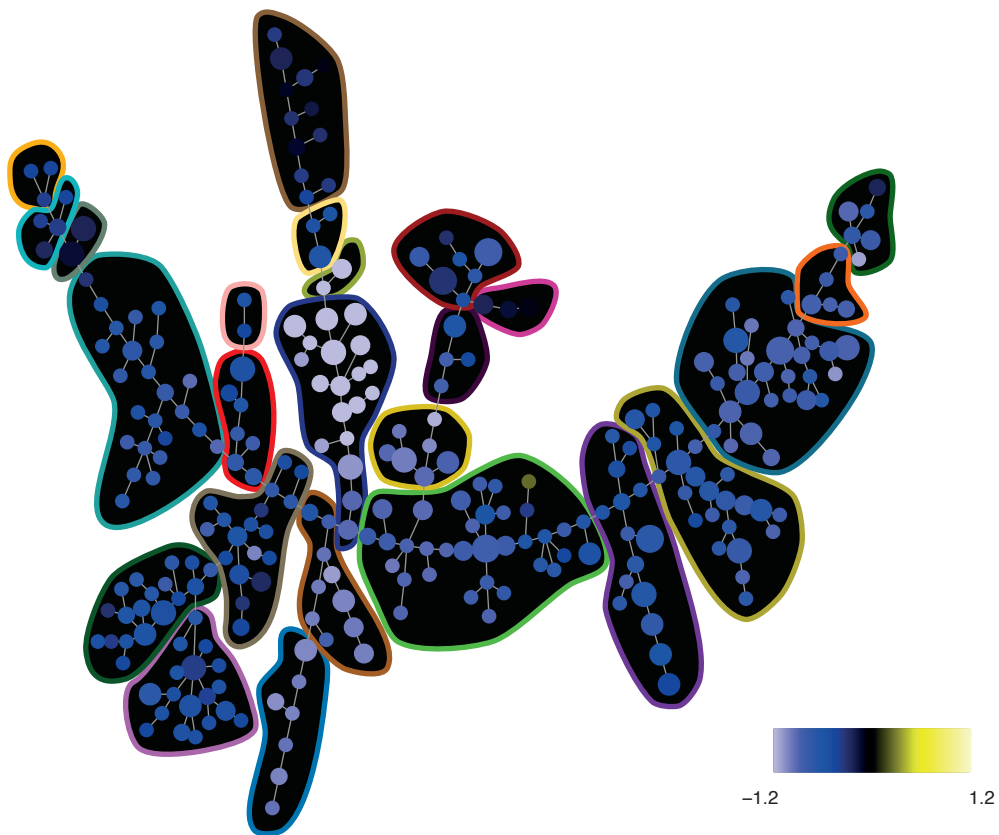



Figure S9B

175-pCrkL ---- Dasatinib+BCR vs Ref Ratio

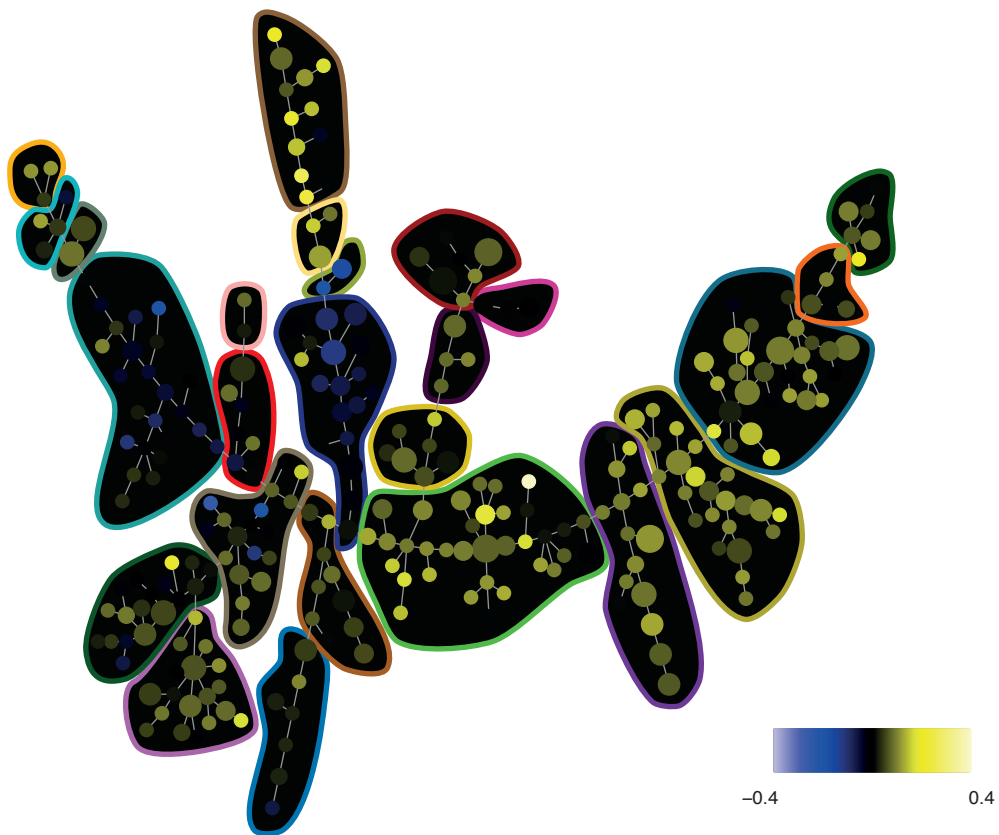

Figure S9B

175-pCrkL ---- Dasatinib+Flt3L vs Ref Ratio

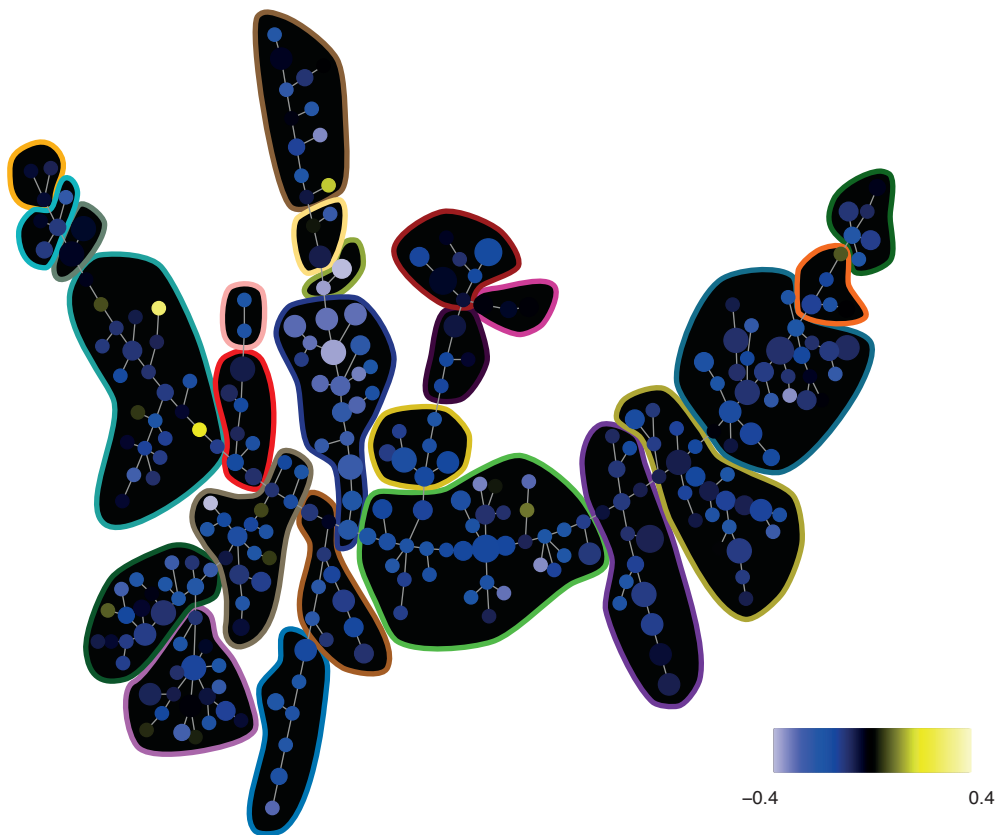

Figure S9B

175-pCrkL ---- Dasatinib+IL7 vs Ref Ratio

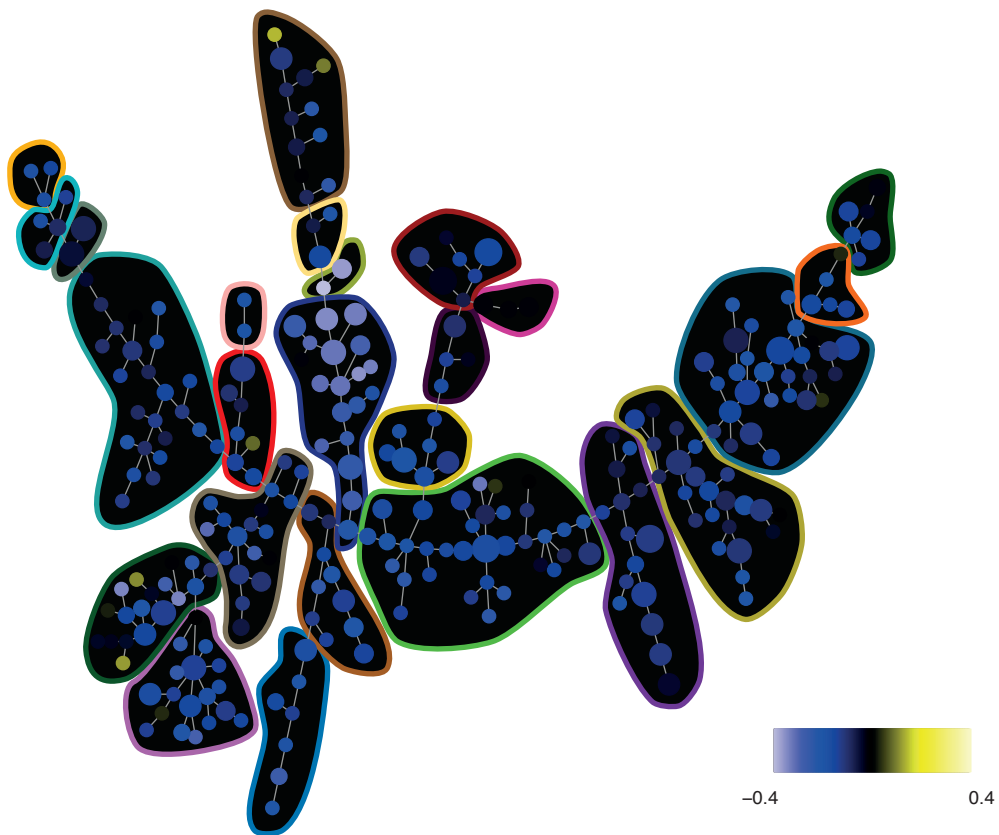

Figure S9B

175-pCrkL --- Dasatinib+PMAiono vs Ref Ratio

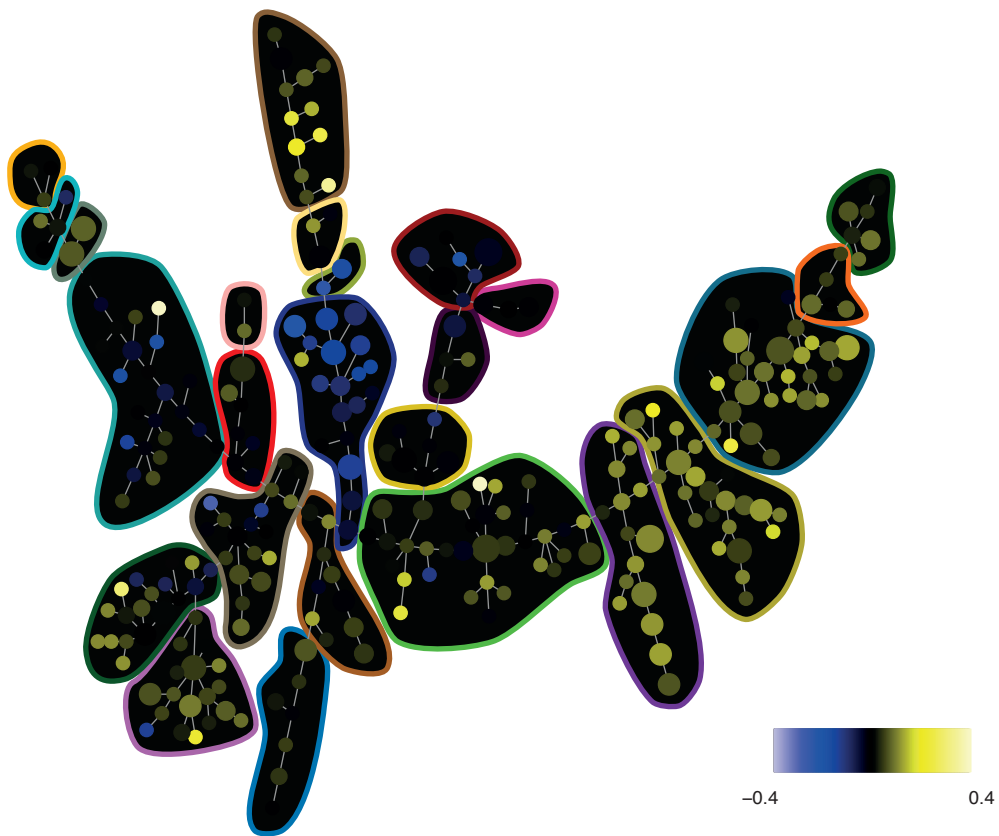

Figure S9B

175-pCrkL --- Dasatinib+PVO4 vs Ref Ratio

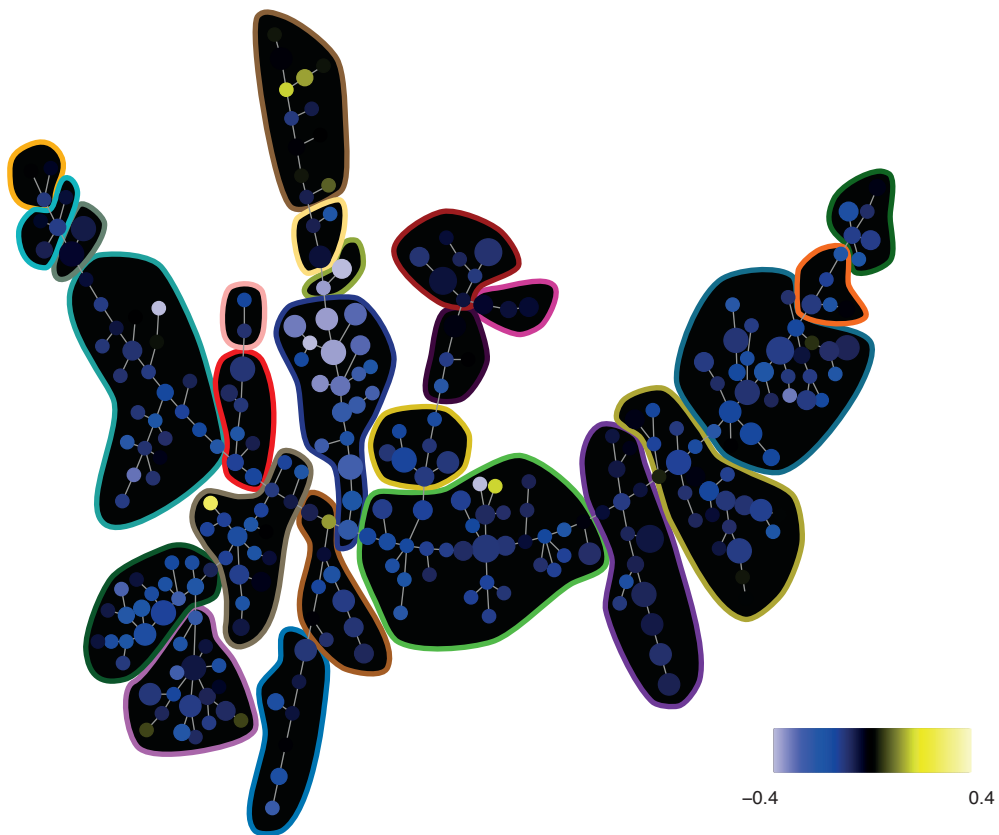

Figure S9B

175-pCrkL --- Dasatinib+Unstim vs Ref Ratio

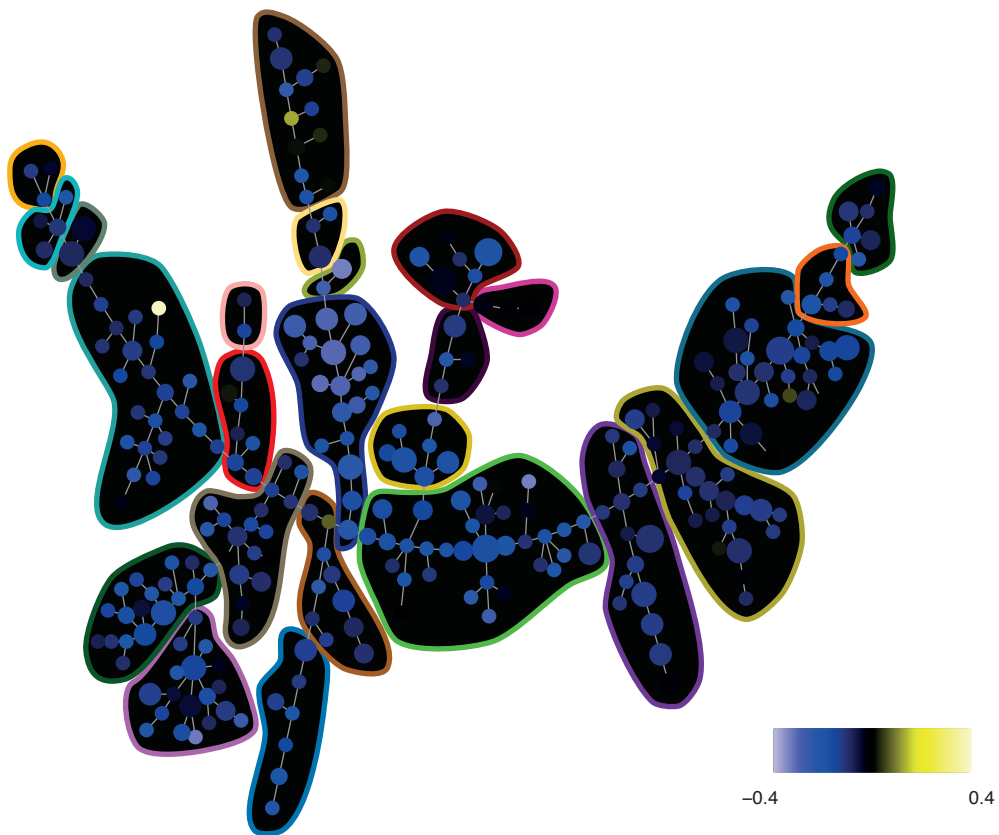

Figure S9B

176-pCREB --- Dasatinib+BCR vs Ref Ratio

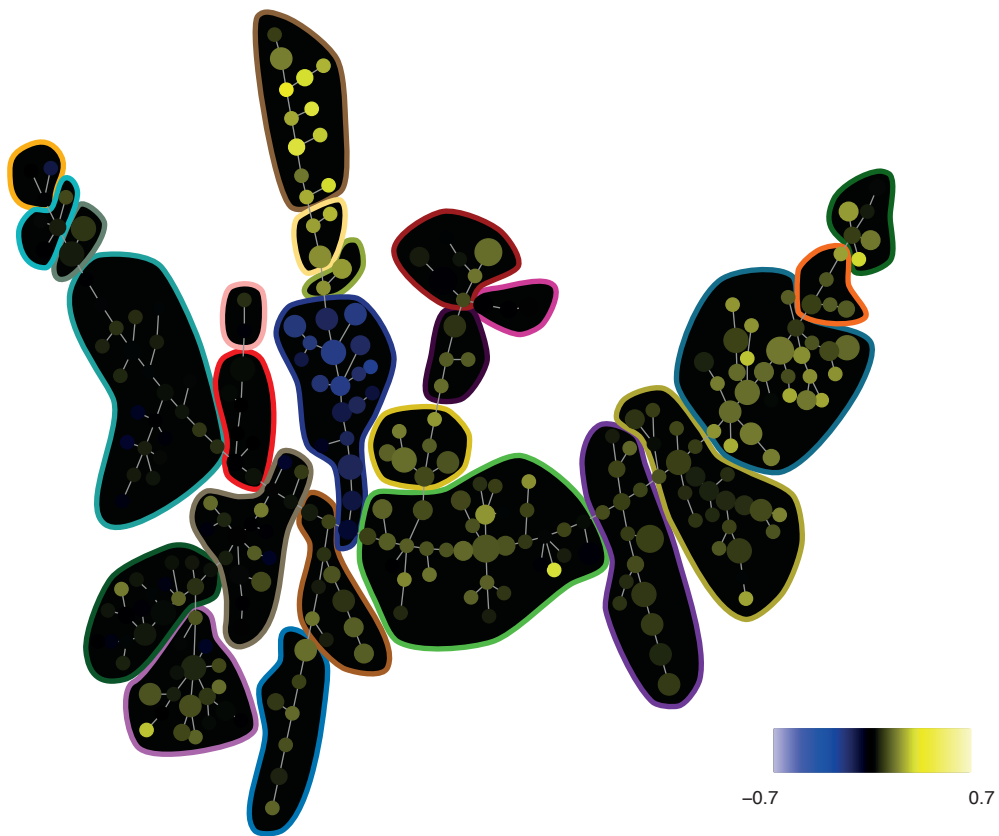

Figure S9B

176-pCREB --- Dasatinib+Flt3L vs Ref Ratio

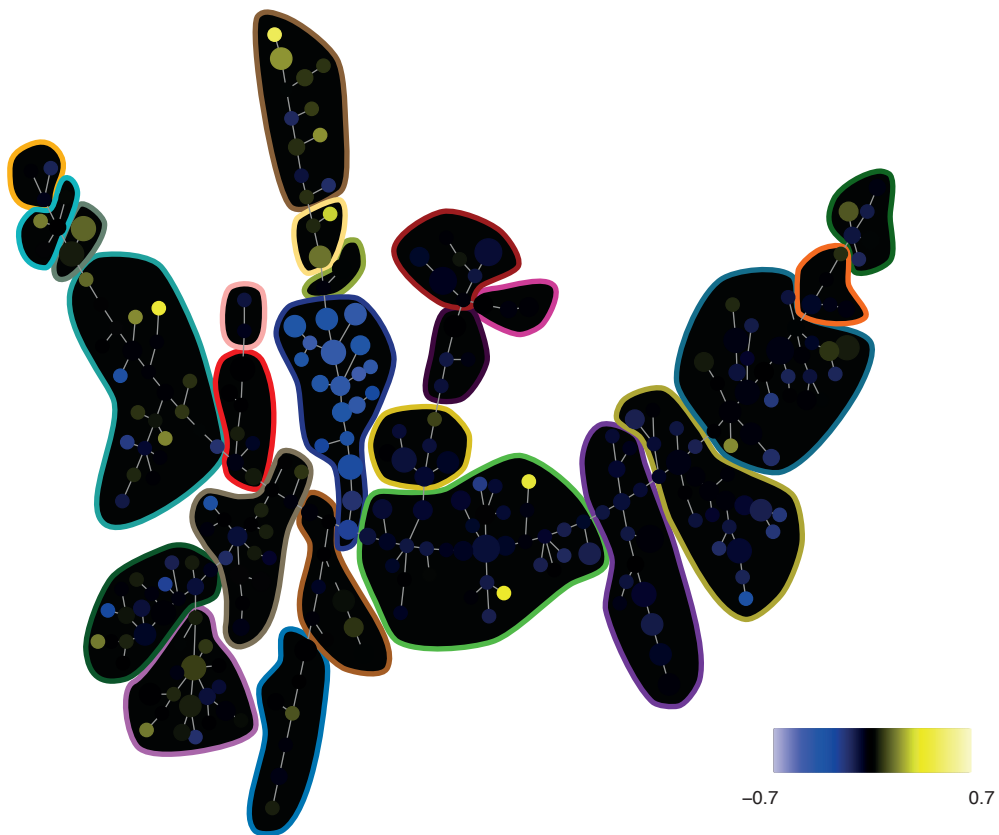



Figure S9B

176-pCREB — Dasatinib+IL7 vs Ref Ratio

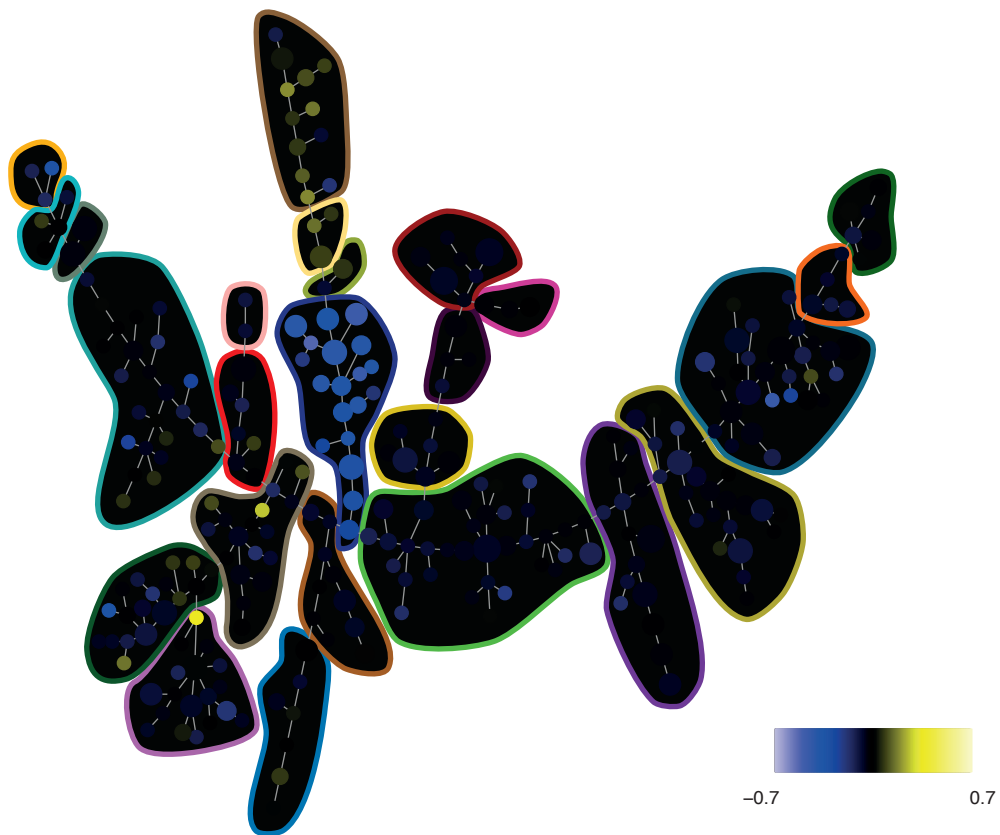

Figure S9B

176-pCREB ---- Dasatinib+PMAiono vs Ref Ratio

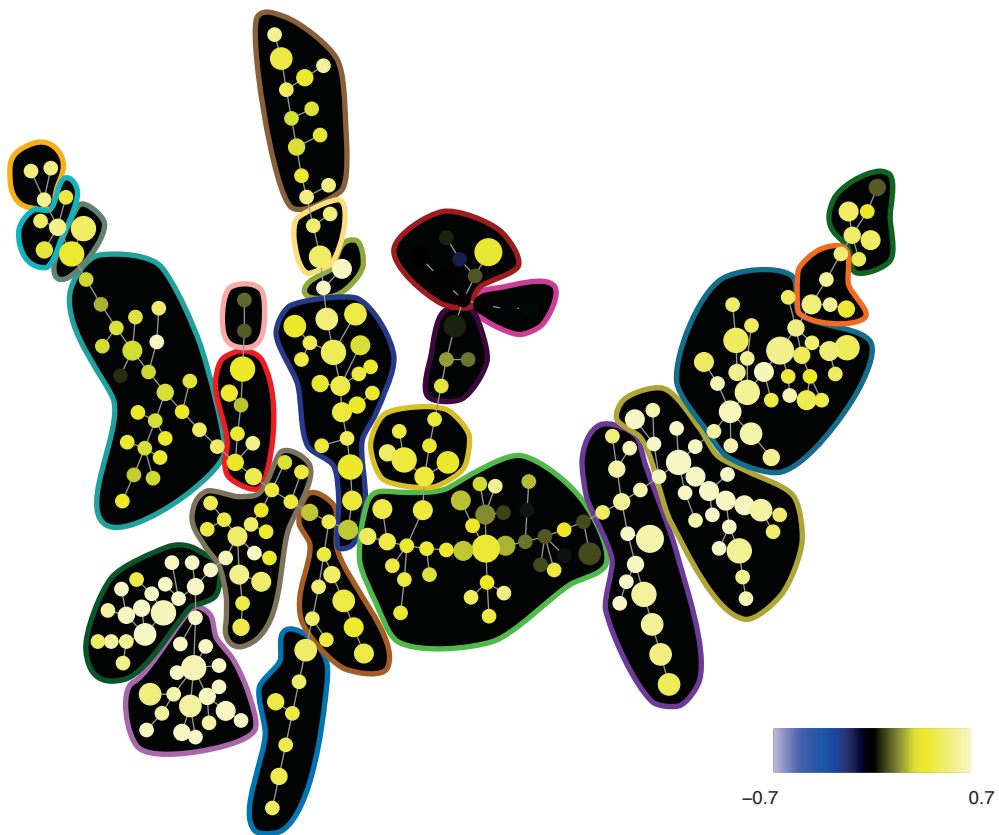

Figure S9B

176-pCREB — Dasatinib+PVO4 vs Ref Ratio

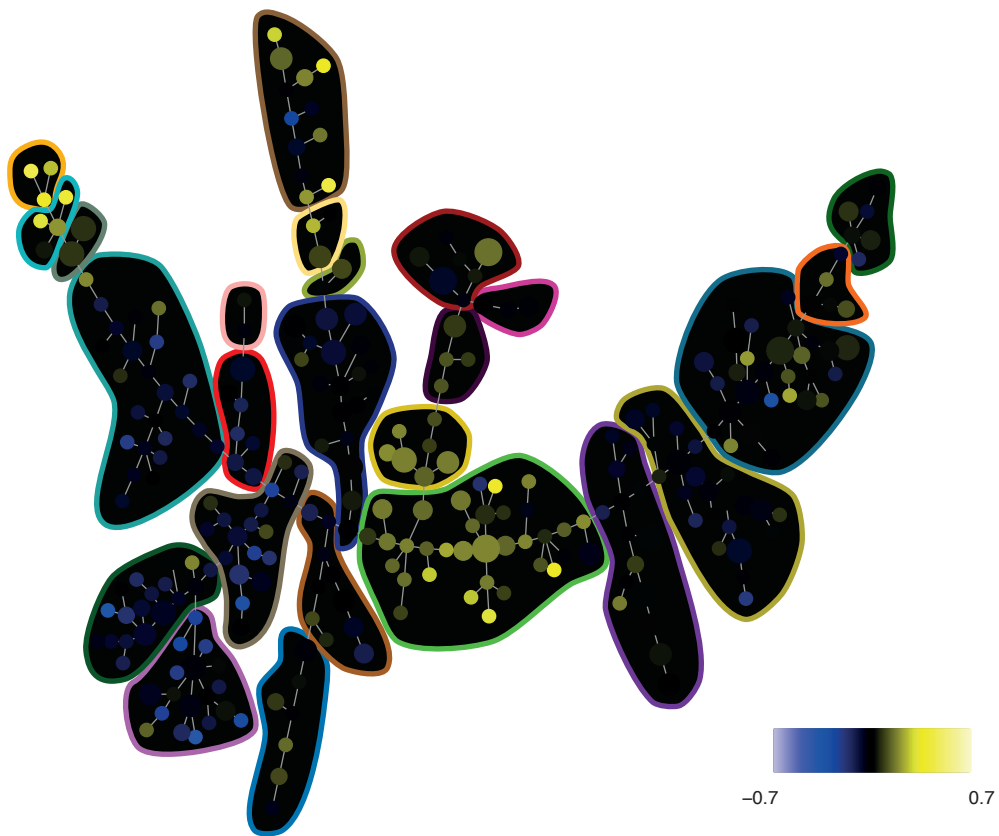

Figure S9B

176-pCREB --- Dasatinib+Unstim vs Ref Ratio

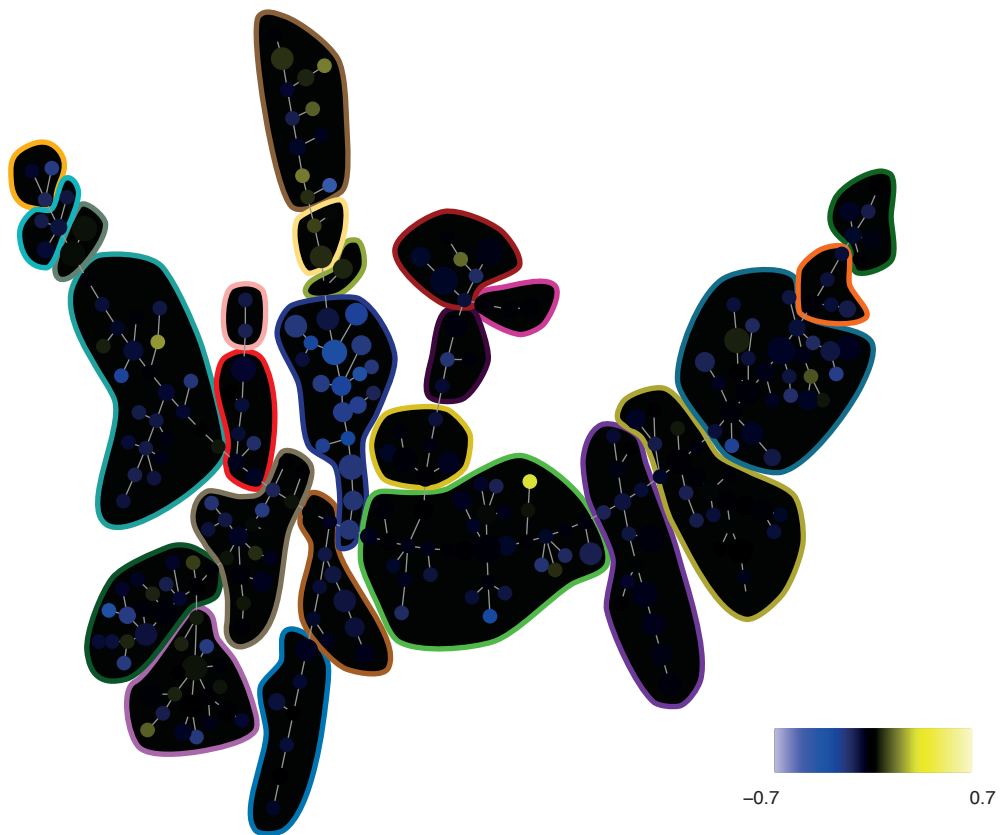

Figure S9C

141-pPLCgamma2 --- JAKi+GCSF vs Ref Ratio

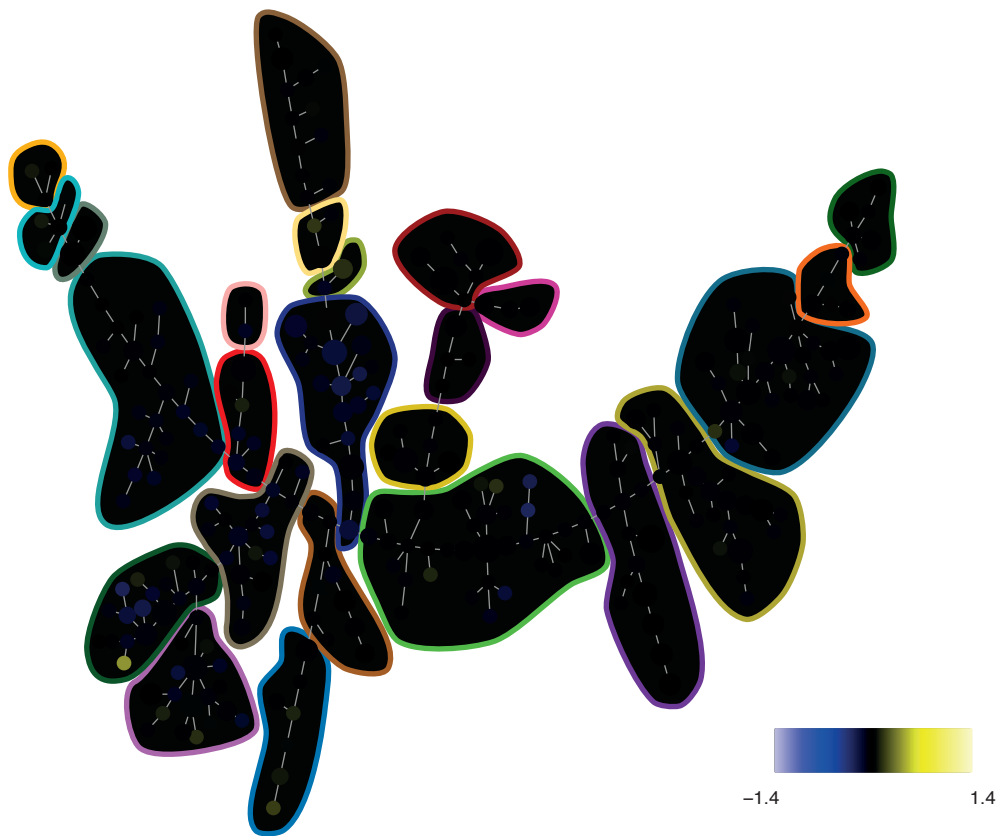

Figure S9C

141-pPLCgamma2 ---- JAKi+Unstim vs Ref Ratio

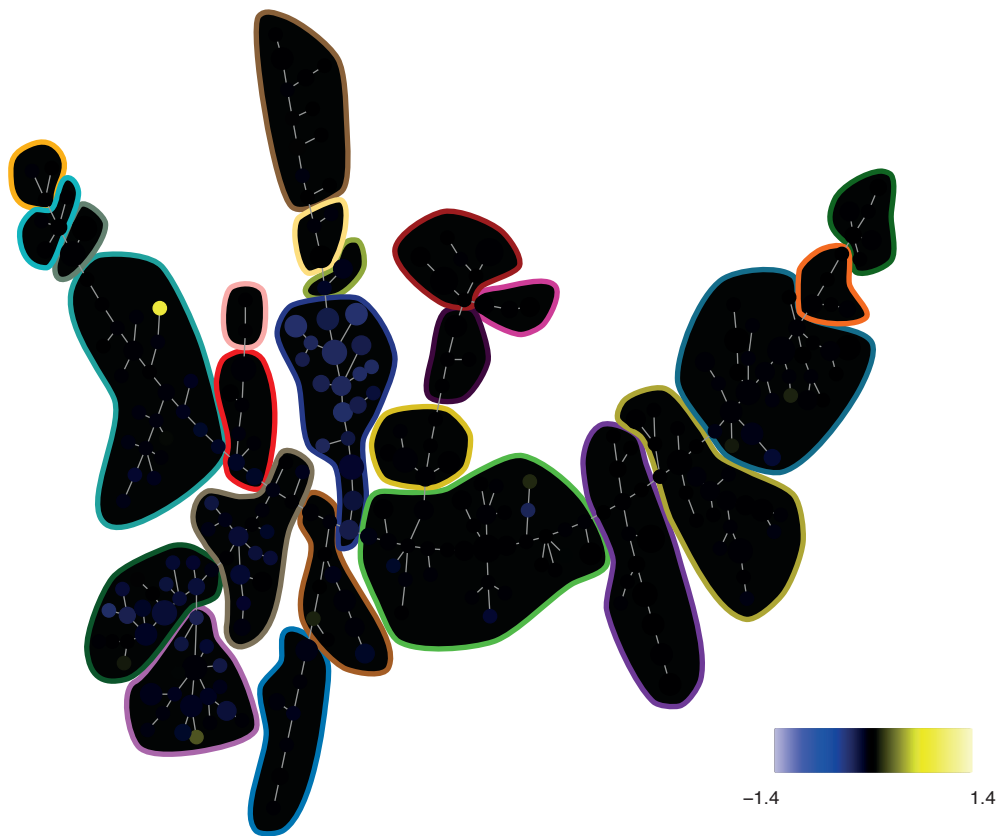

Figure S9C

150-pSTAT5 ---- JAKi+GCSF vs Ref Ratio

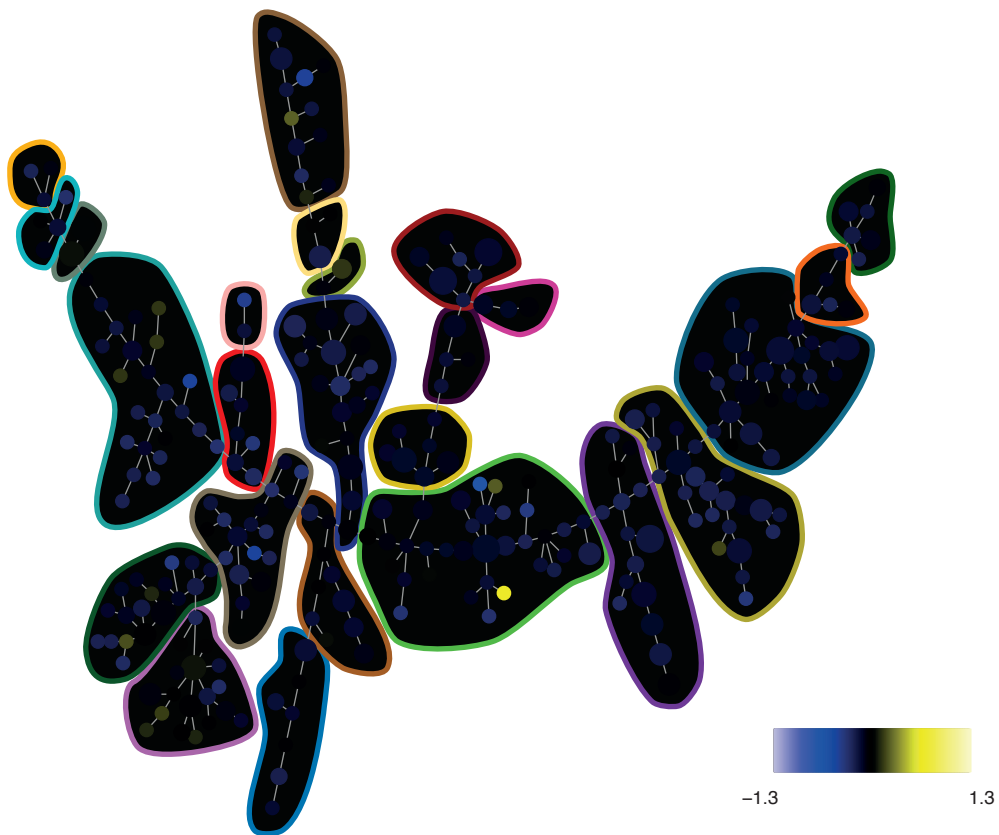

Figure S9C

150-pSTAT5 ---- JAKi+Unstim vs Ref Ratio

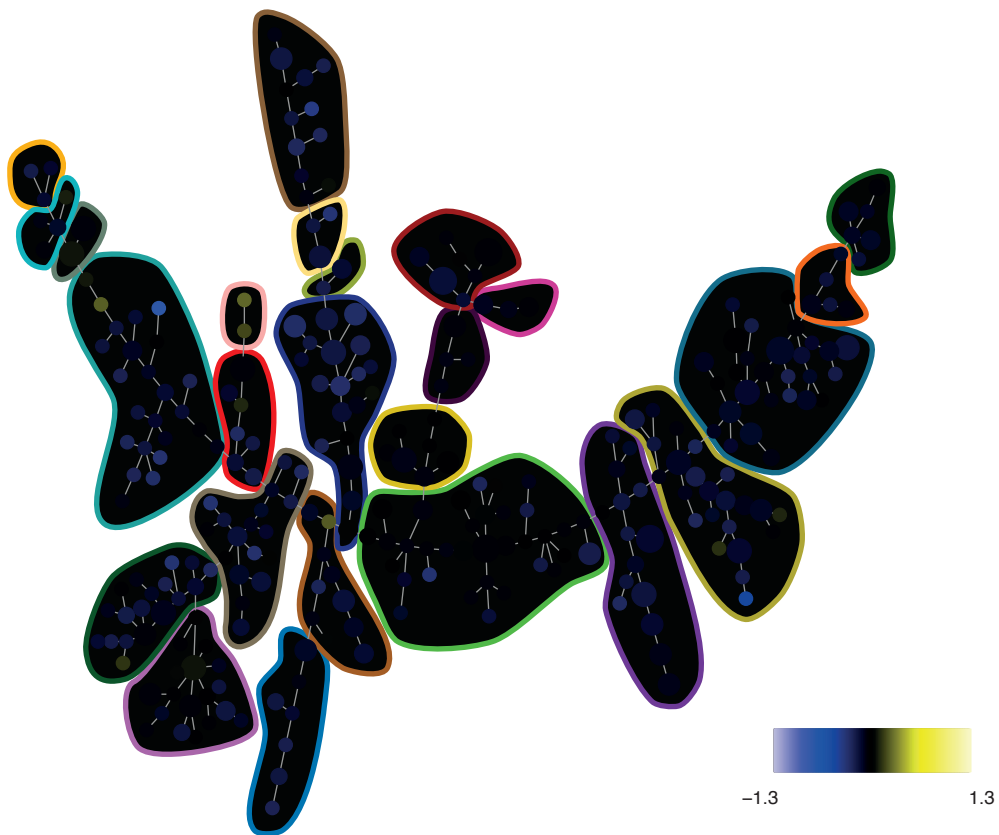



Figure S9C

151-pERK1/2 --- JAKi+GCSF vs Ref Ratio

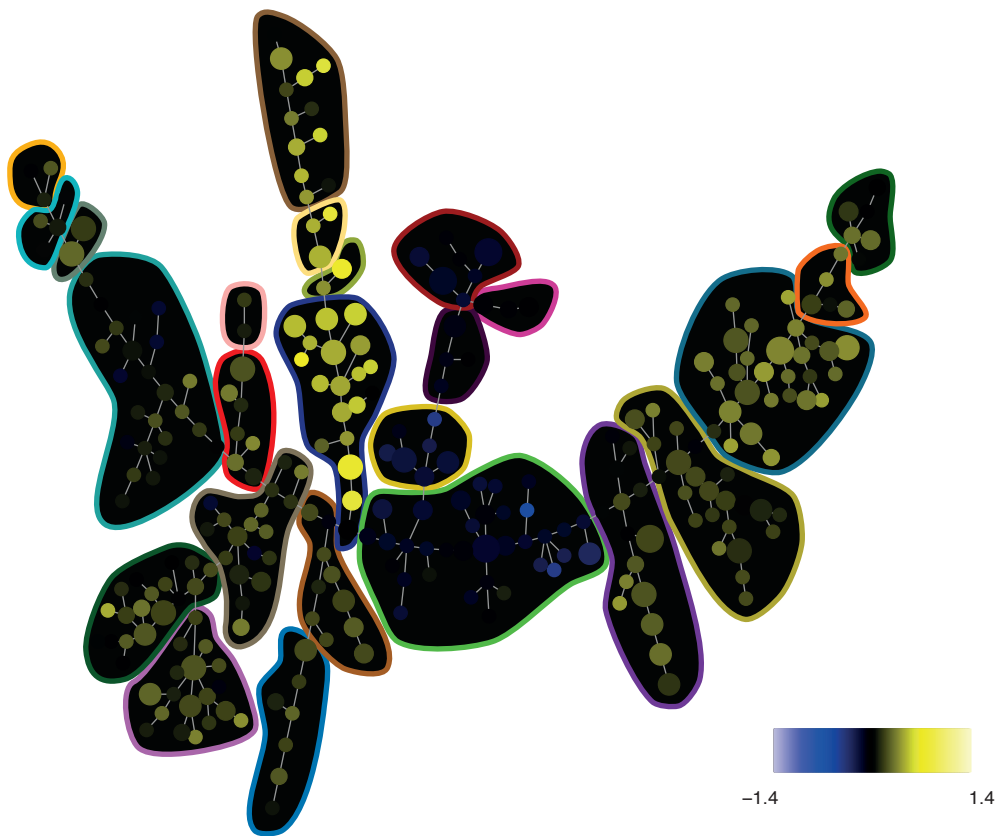

Figure S9C

151-pERK1/2 ---- JAKi+Unstim vs Ref Ratio

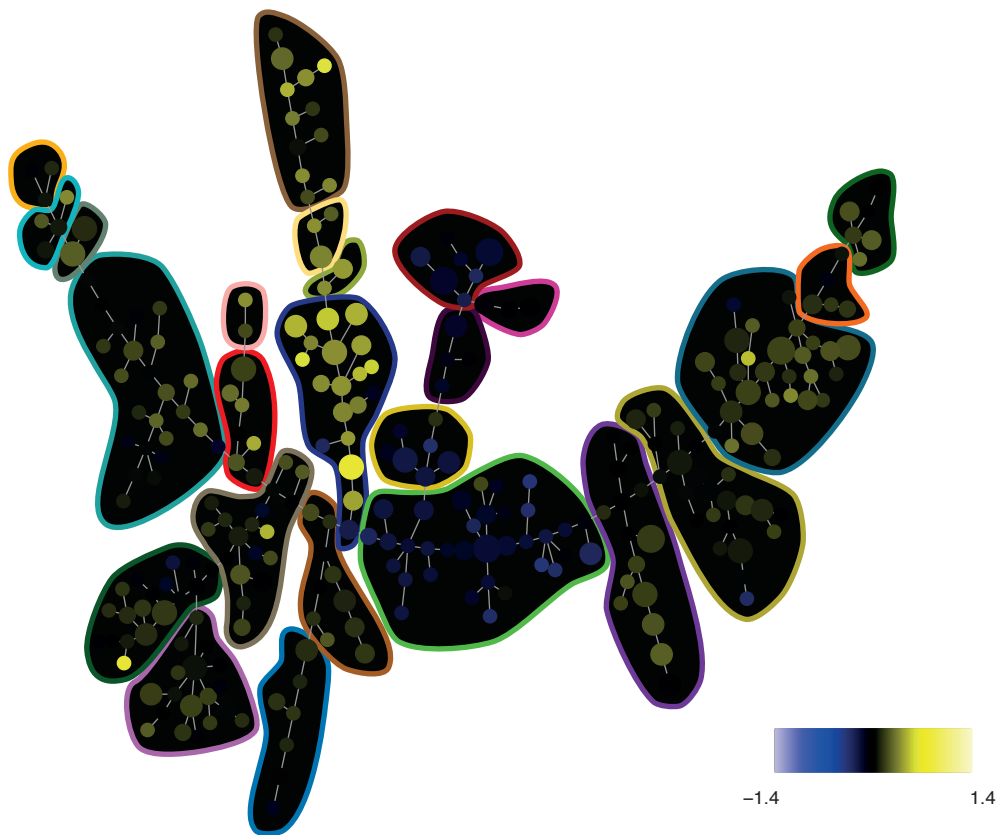

Figure S9C

152-Ki67 ---- JAKi+GCSF vs Ref Ratio

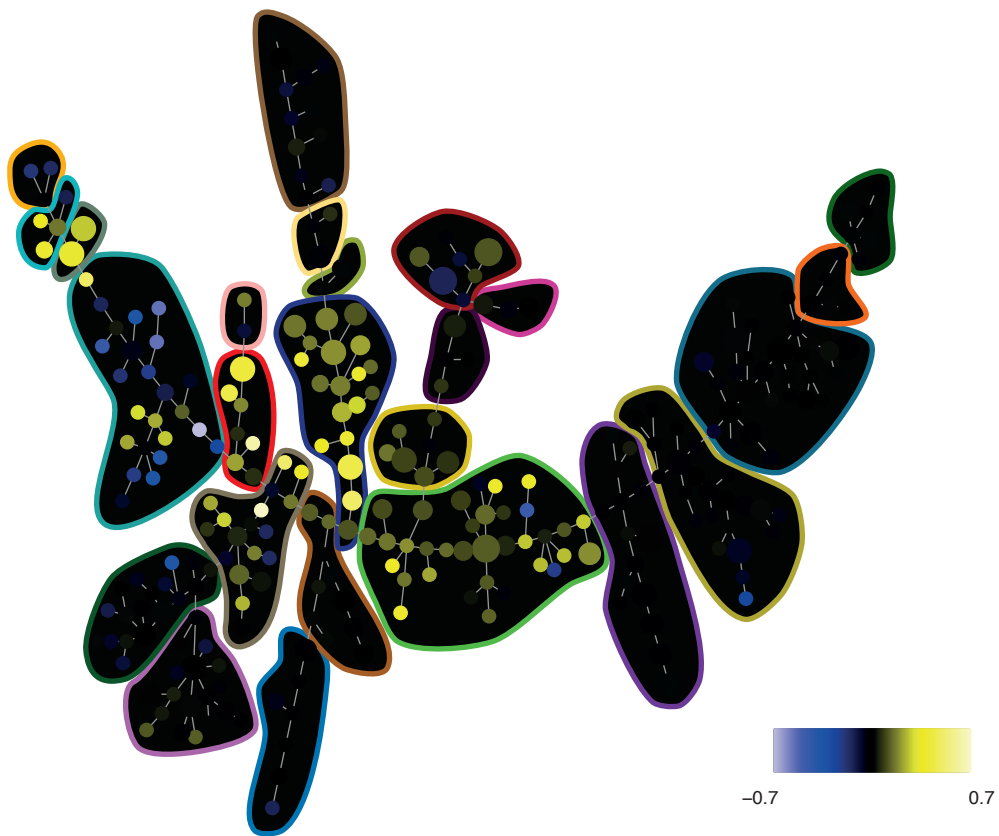

Figure S9C

152-Ki67 --- JAKi+Unstim vs Ref Ratio

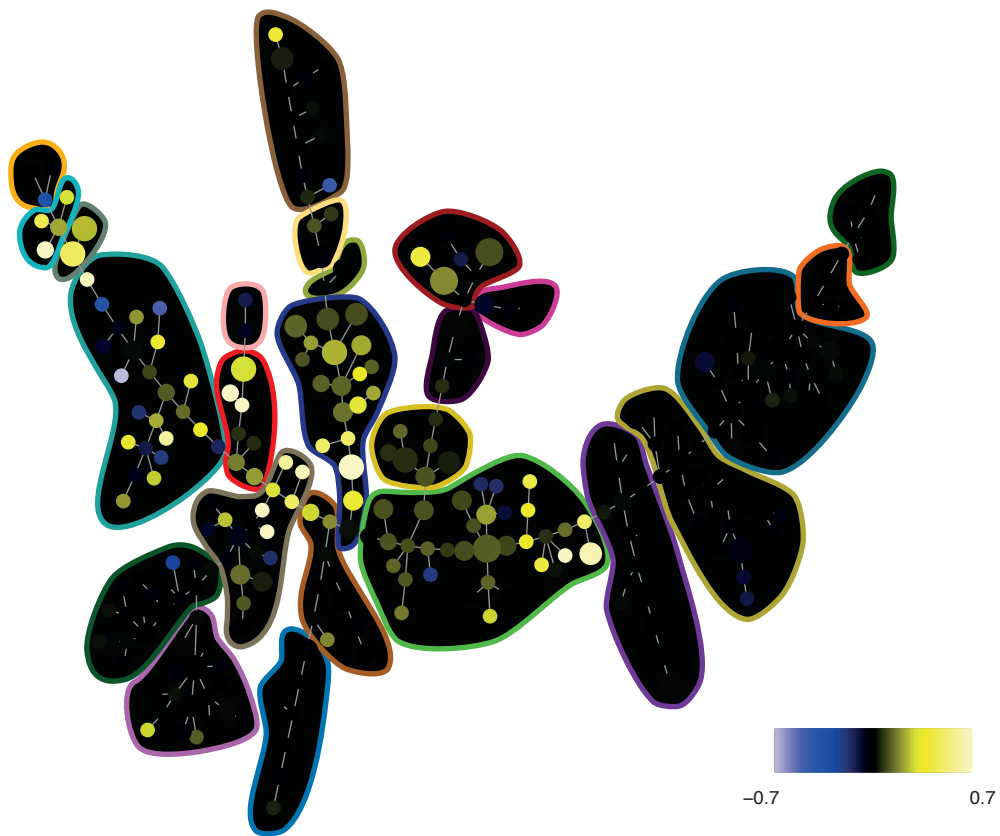

Figure S9C

153-pMAPKAPK2 ---- JAKi+GCSF vs Ref Ratio

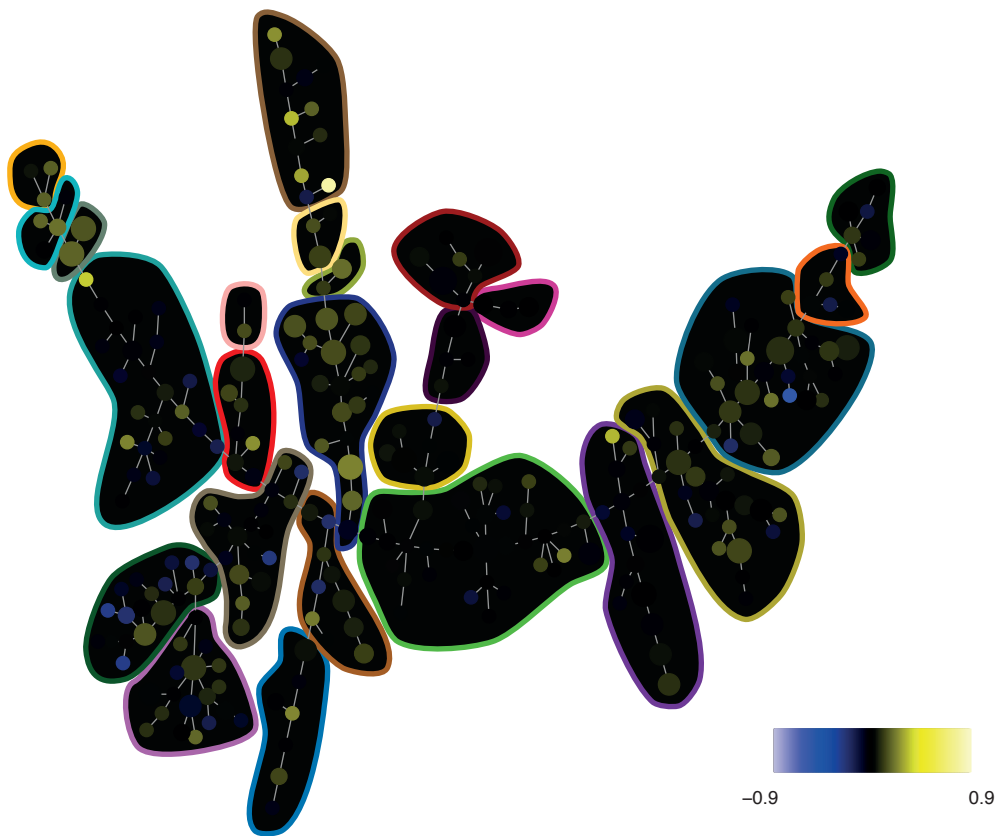

Figure S9C

153-pMAPKAPK2 ---- JAKi+Unstim vs Ref Ratio

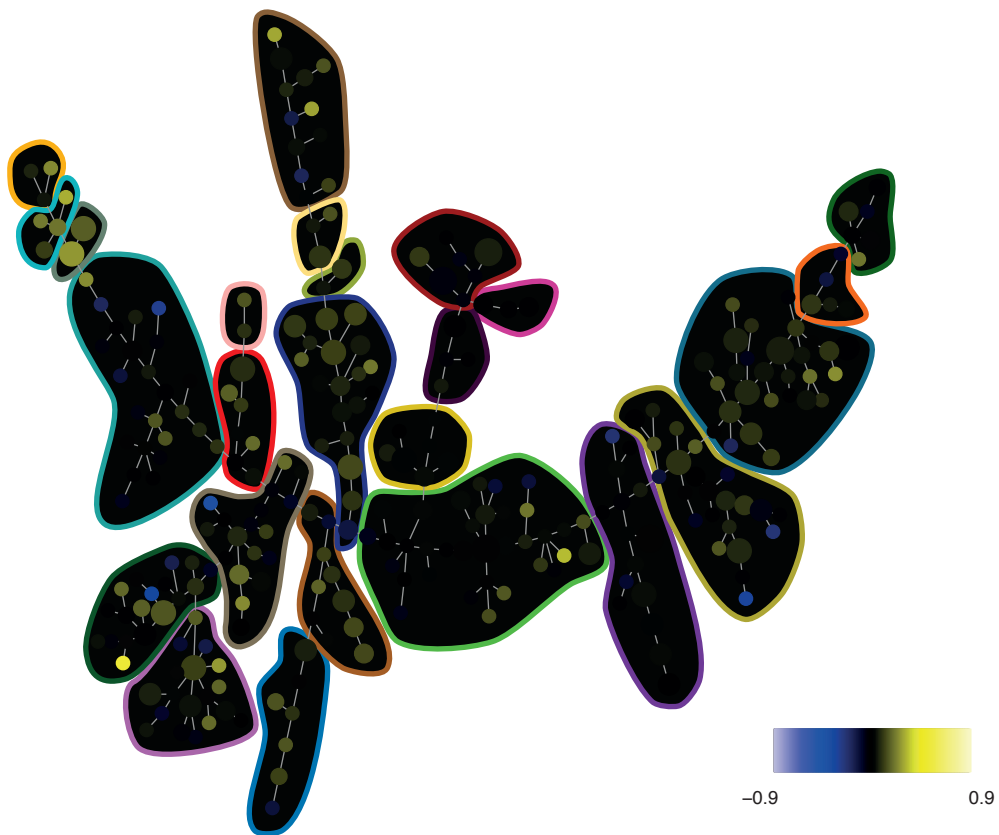

Figure S9C

154-pSHP2 ---- JAKi+GCSF vs Ref Ratio

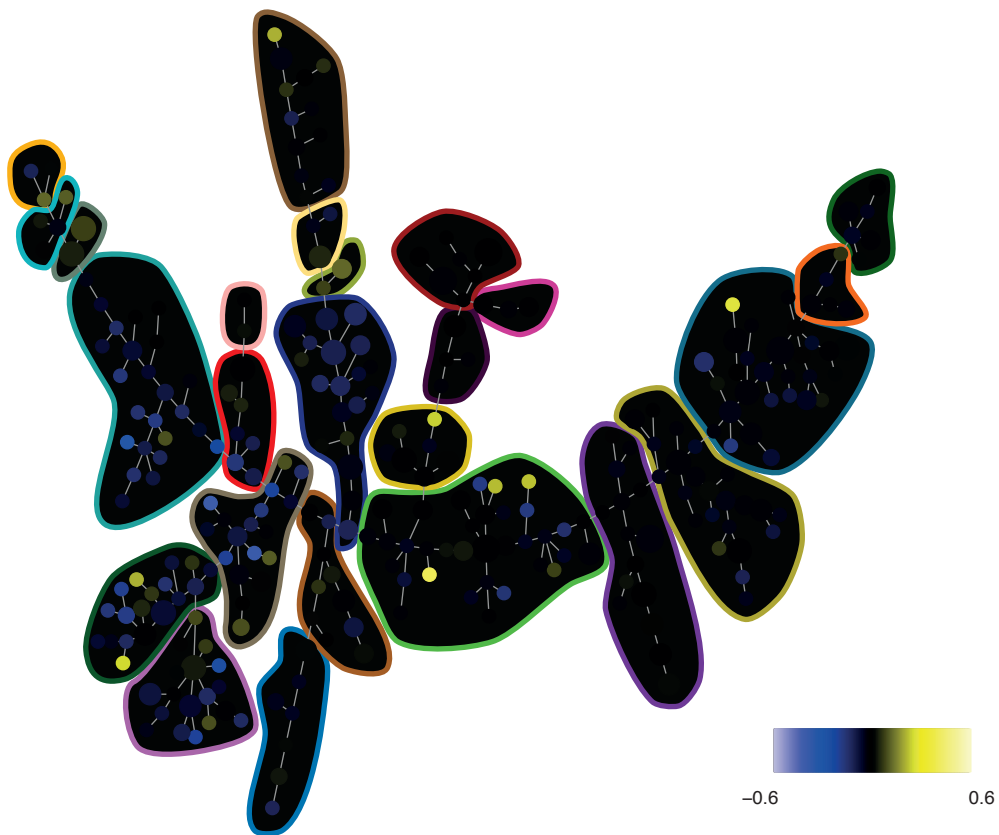

Figure S9C

154-pSHP2 --- JAKi+Unstim vs Ref Ratio

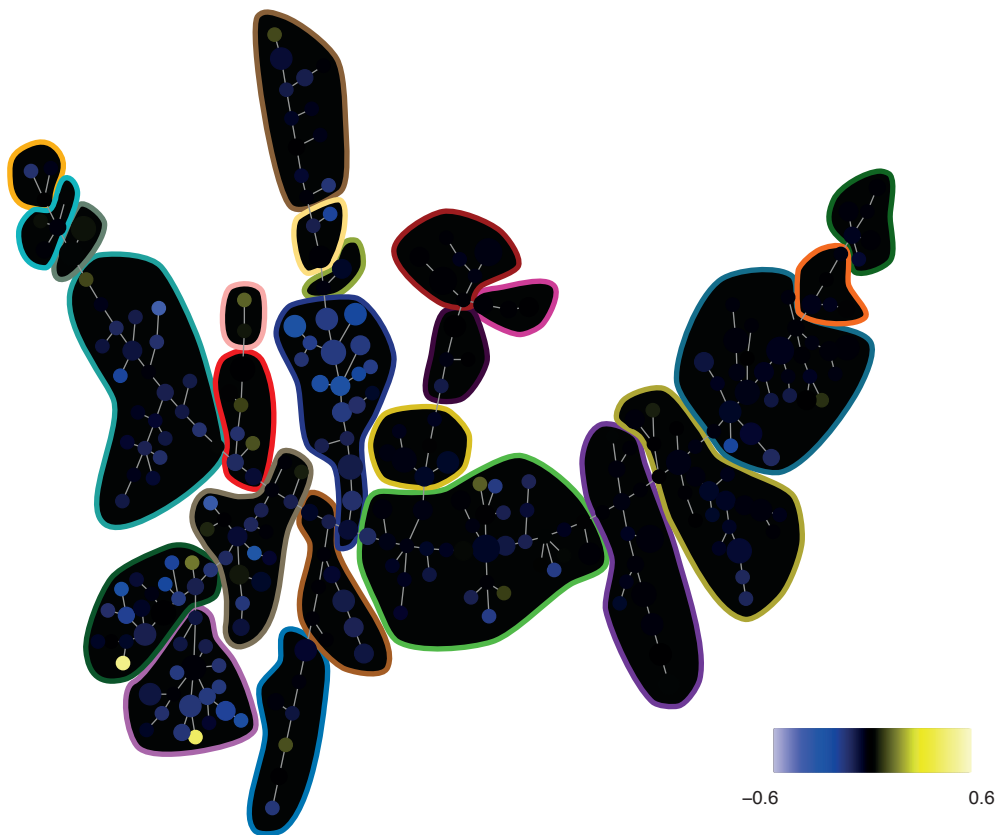



Figure S9C

156-pZAP70/Syk ---- JAKi+GCSF vs Ref Ratio

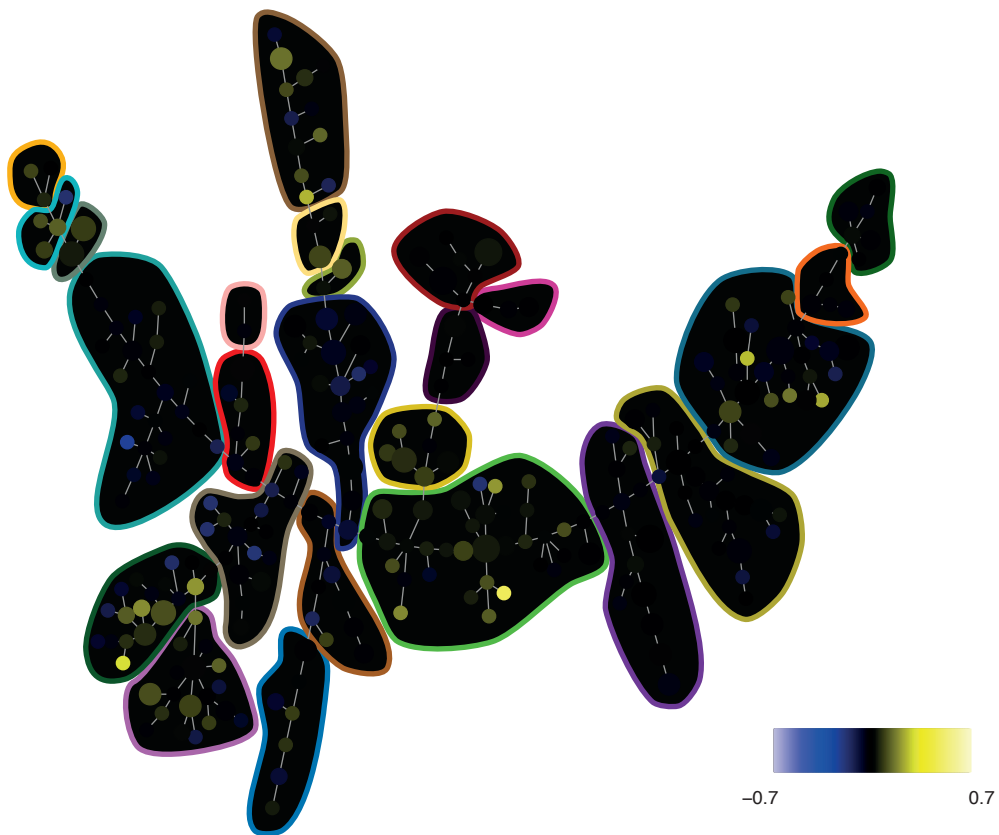

Figure S9C

156-pZAP70/Syk --- JAKi+Unstim vs Ref Ratio

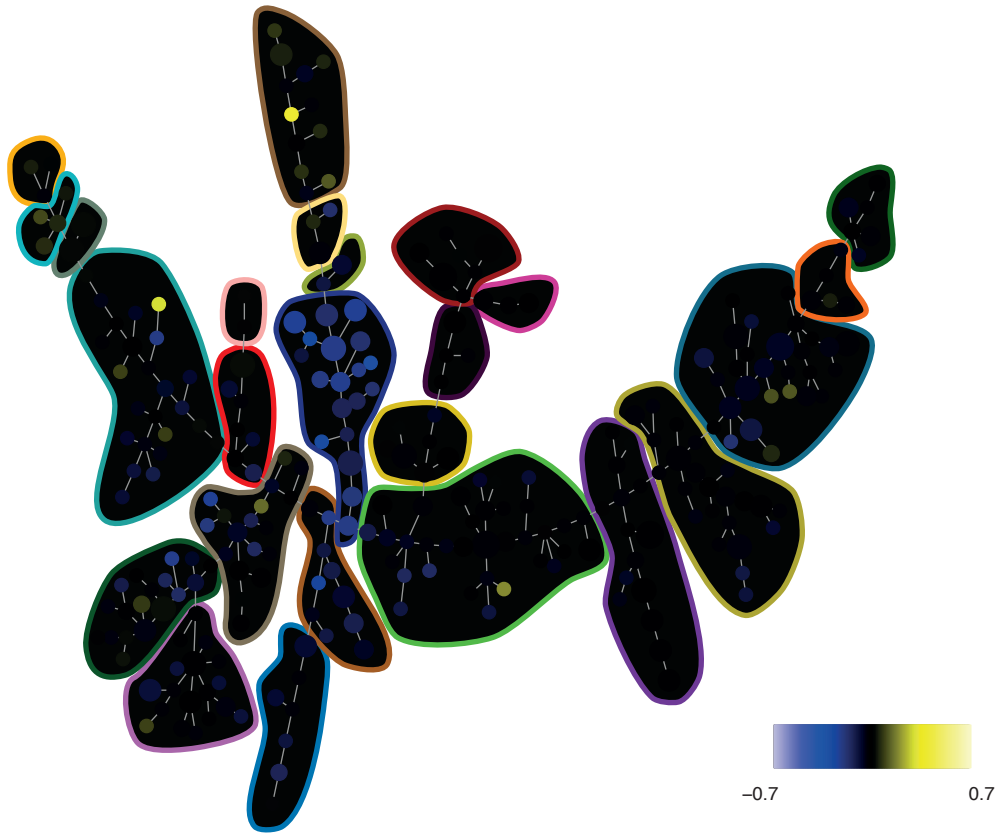

Figure S9C

159-pSTAT3 ---- JAKi+GCSF vs Ref Ratio

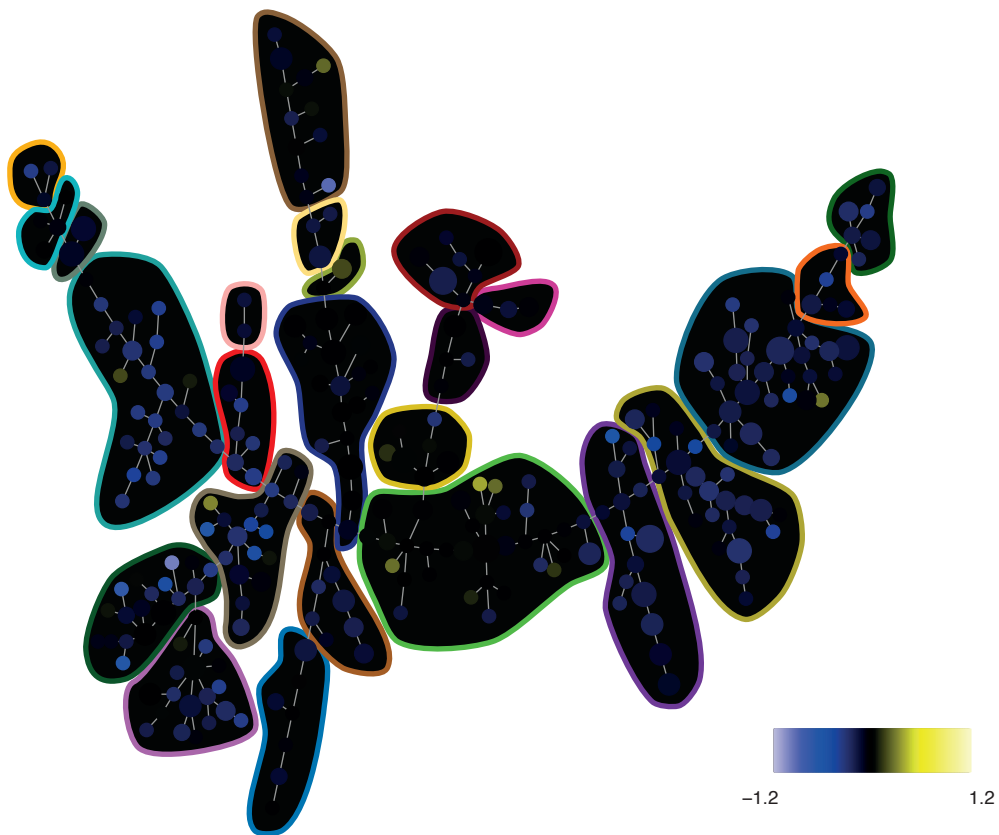

Figure S9C

159-pSTAT3 ---- JAKi+Unstim vs Ref Ratio

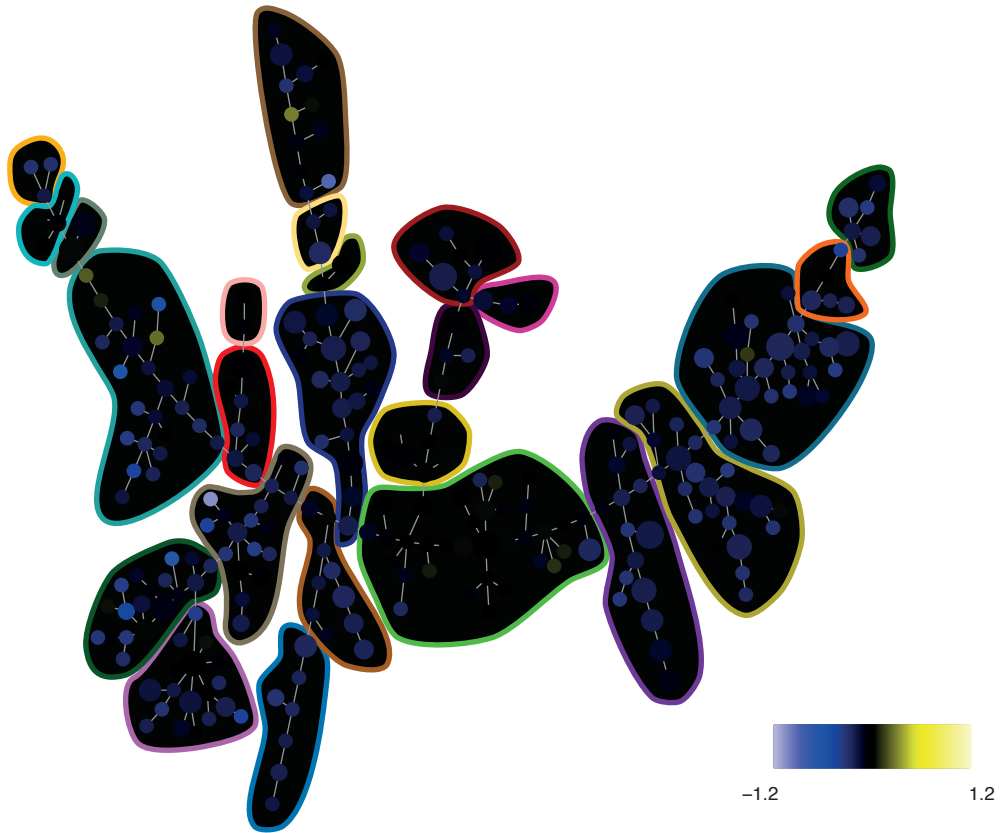

Figure S9C

164-pSLP-76 ---- JAKi+GCSF vs Ref Ratio

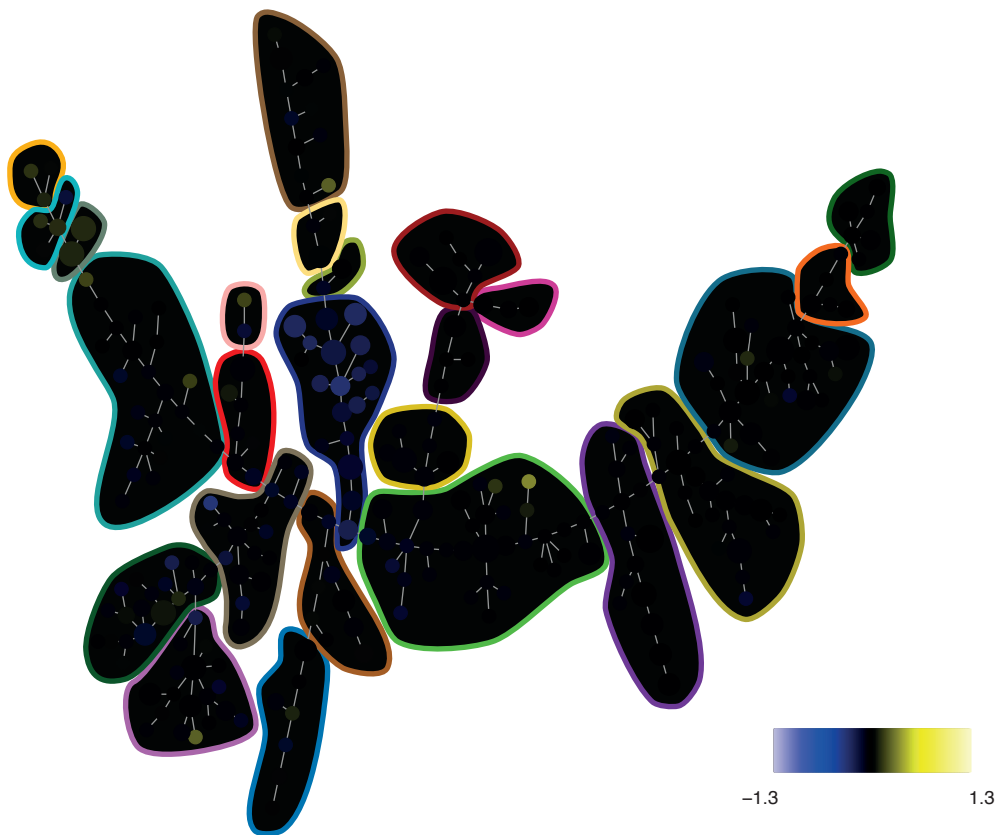

Figure S9C

164-pSLP-76 ---- JAKi+Unstim vs Ref Ratio

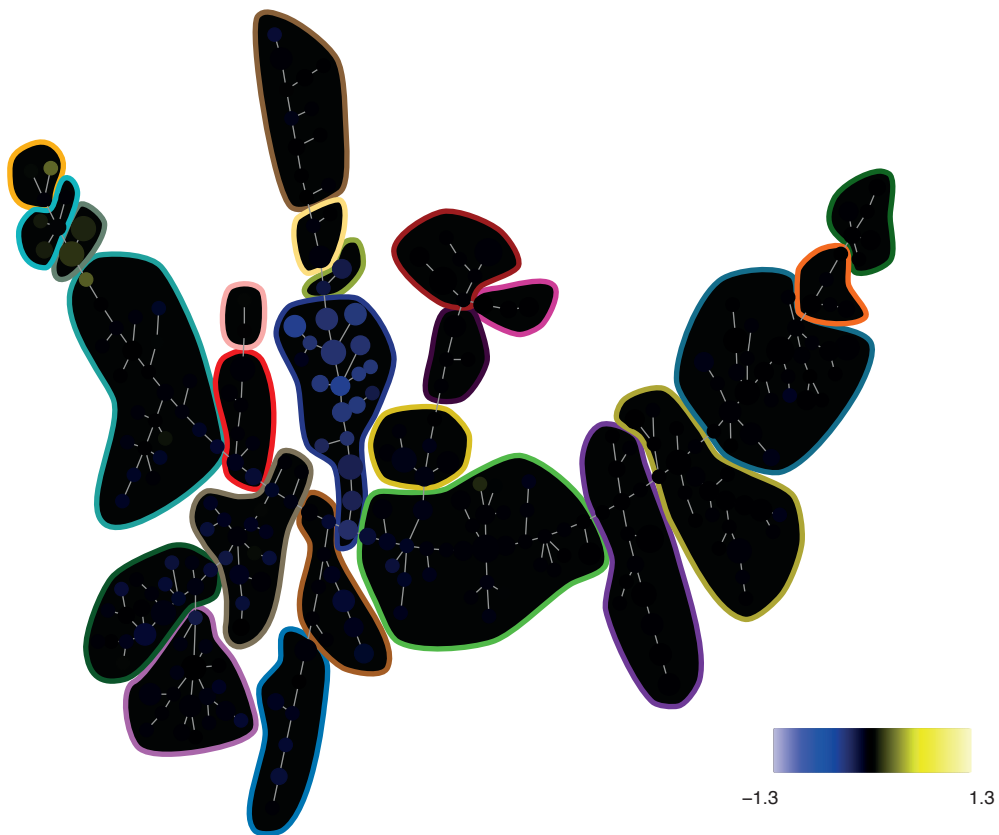

Figure S9C

165-pNFkB ---- JAKi+GCSF vs Ref Ratio

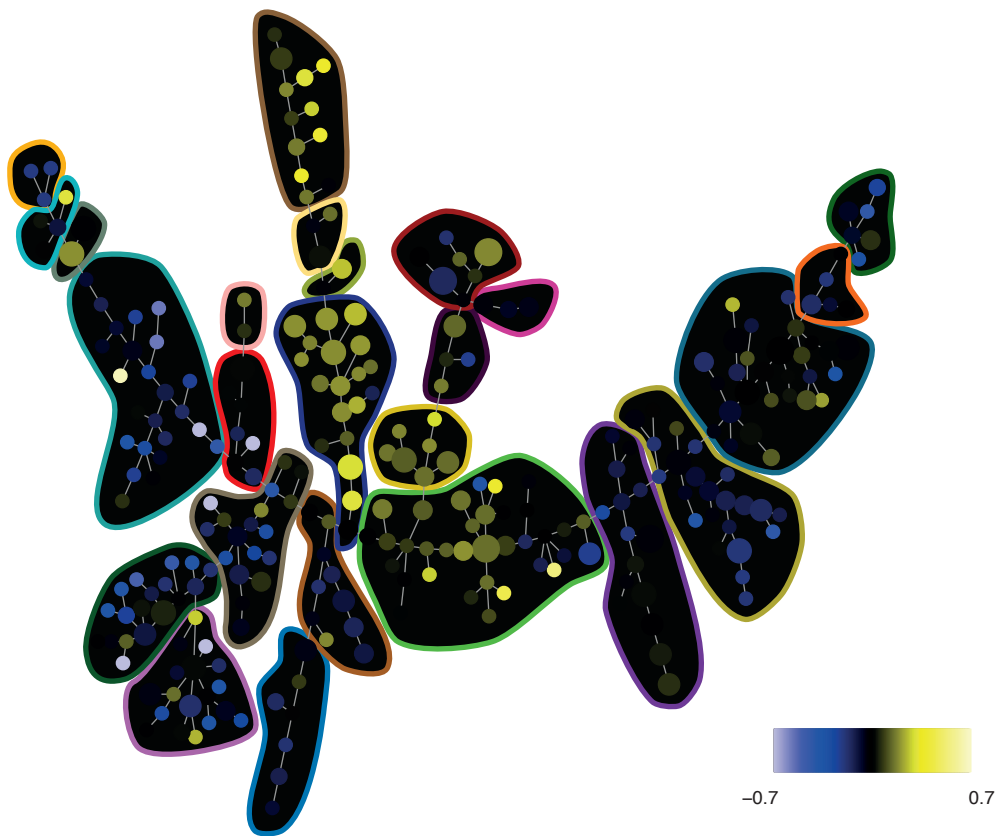

Figure S9C

165-pNFkB ---- JAKi+Unstim vs Ref Ratio

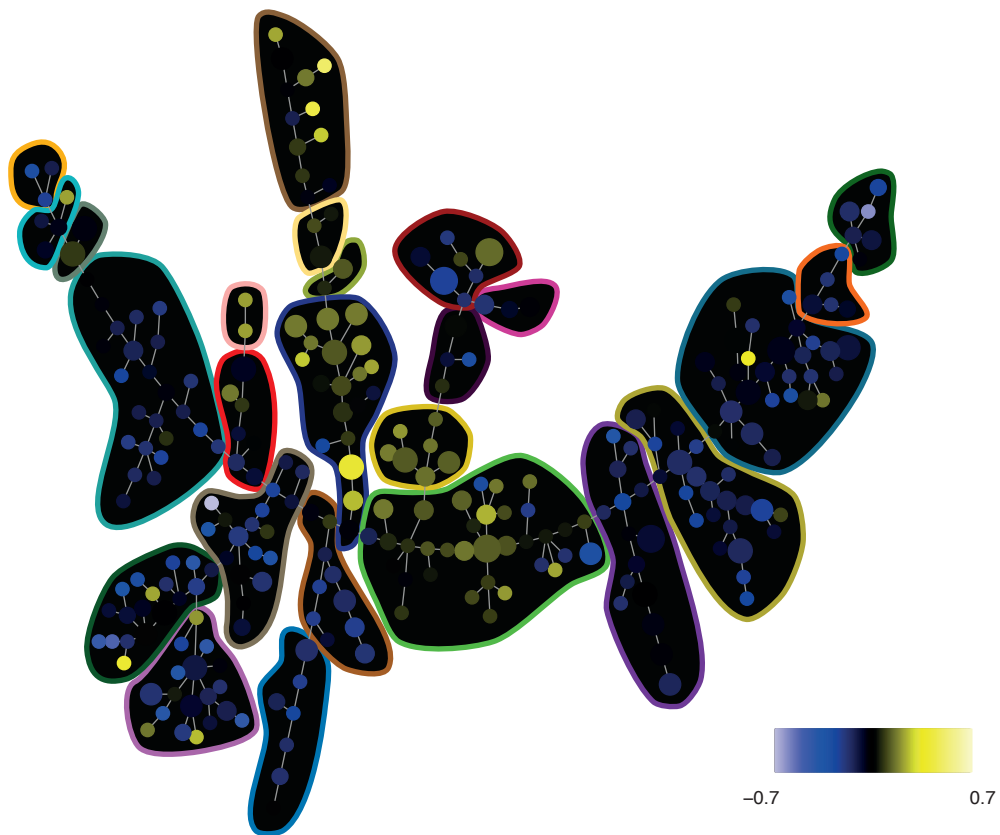



Figure S9C

166-IkBalpha ---- JAKi+GCSF vs Ref Ratio

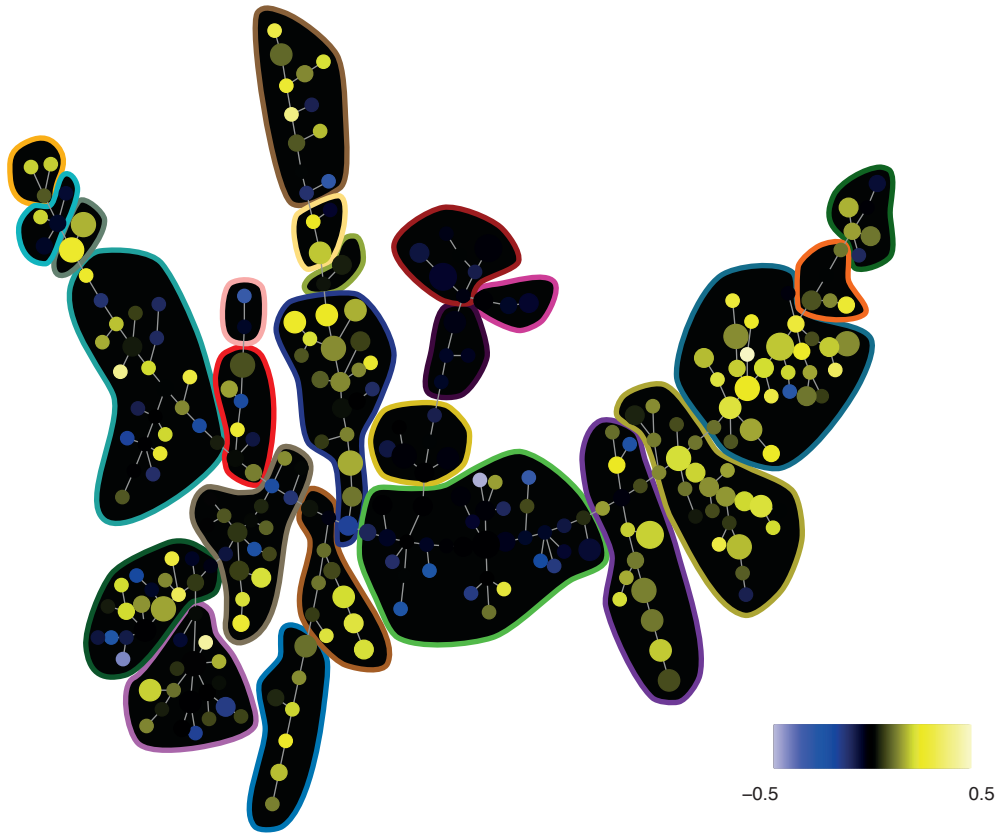

Figure S9C

166-lkBalpha ---- JAKi+Unstim vs Ref Ratio

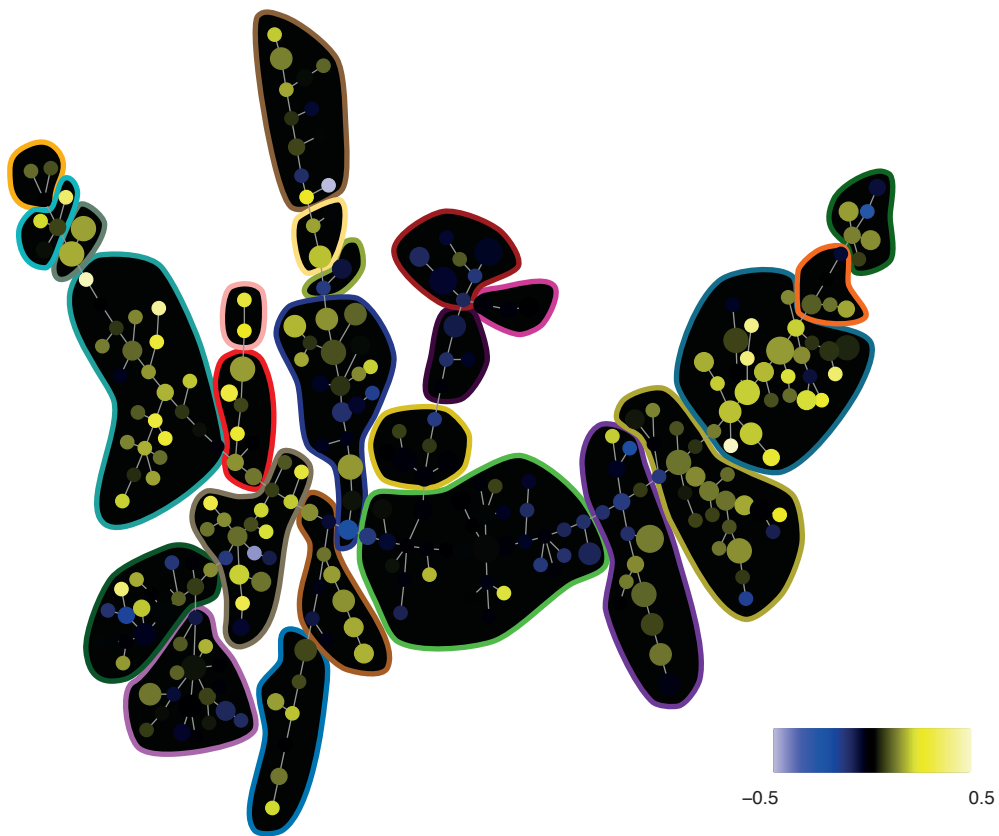

Figure S9C

168-pH3 ---- JAKi+GCSF vs Ref Ratio

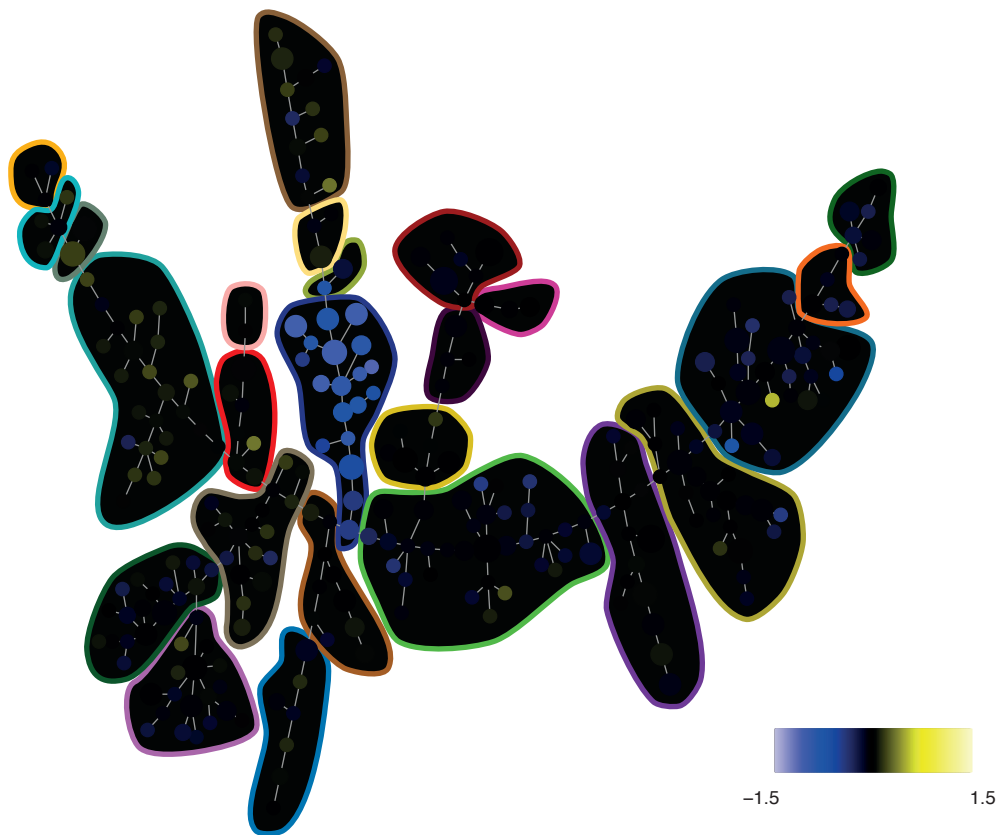

Figure S9C

168-pH3 ---- JAKi+Unstim vs Ref Ratio

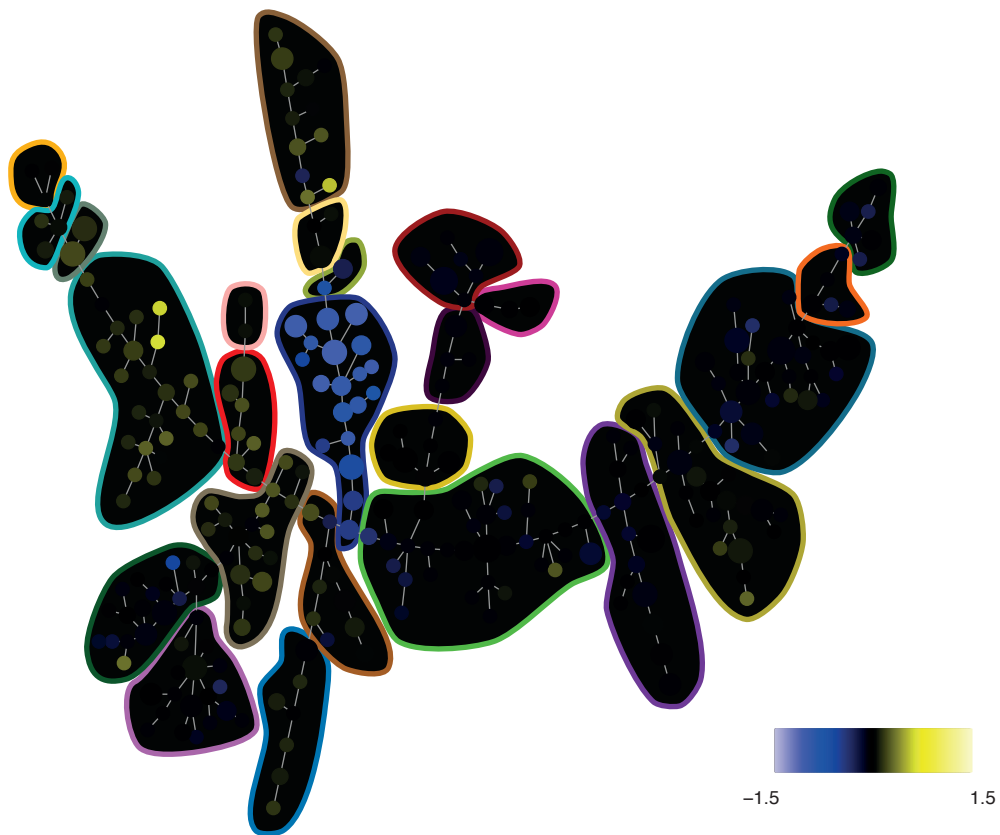

Figure S9C

169-pP38 ---- JAKi+GCSF vs Ref Ratio

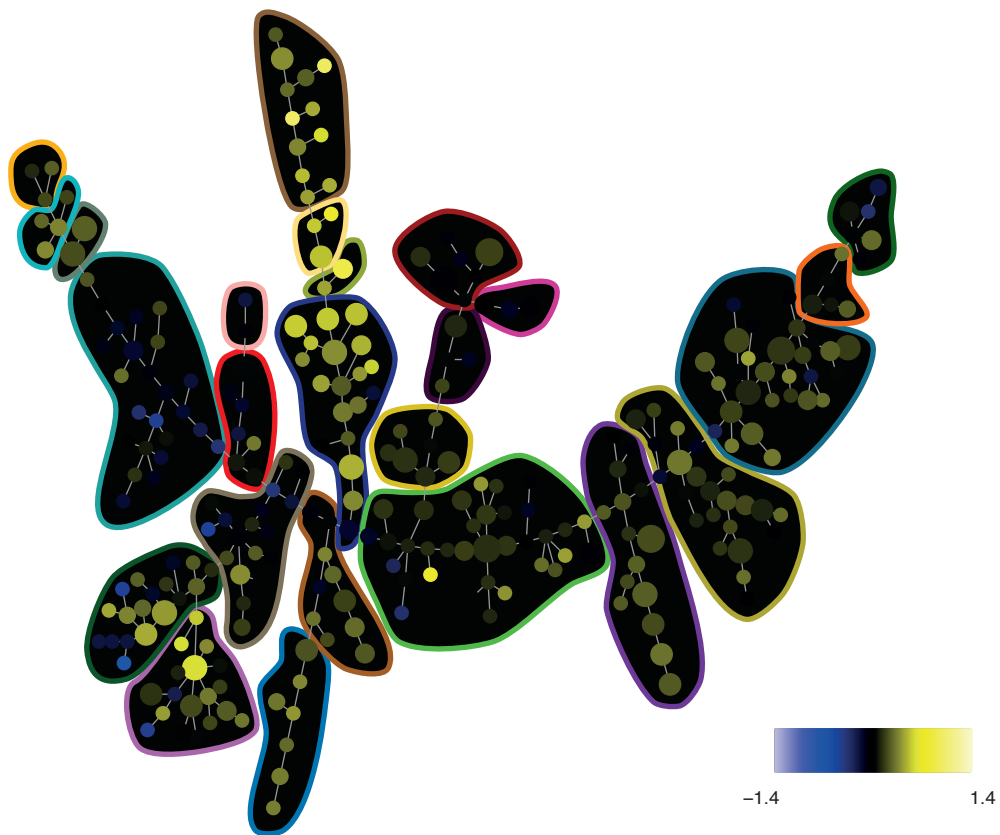

Figure S9C

169-pP38 ---- JAKi+Unstim vs Ref Ratio

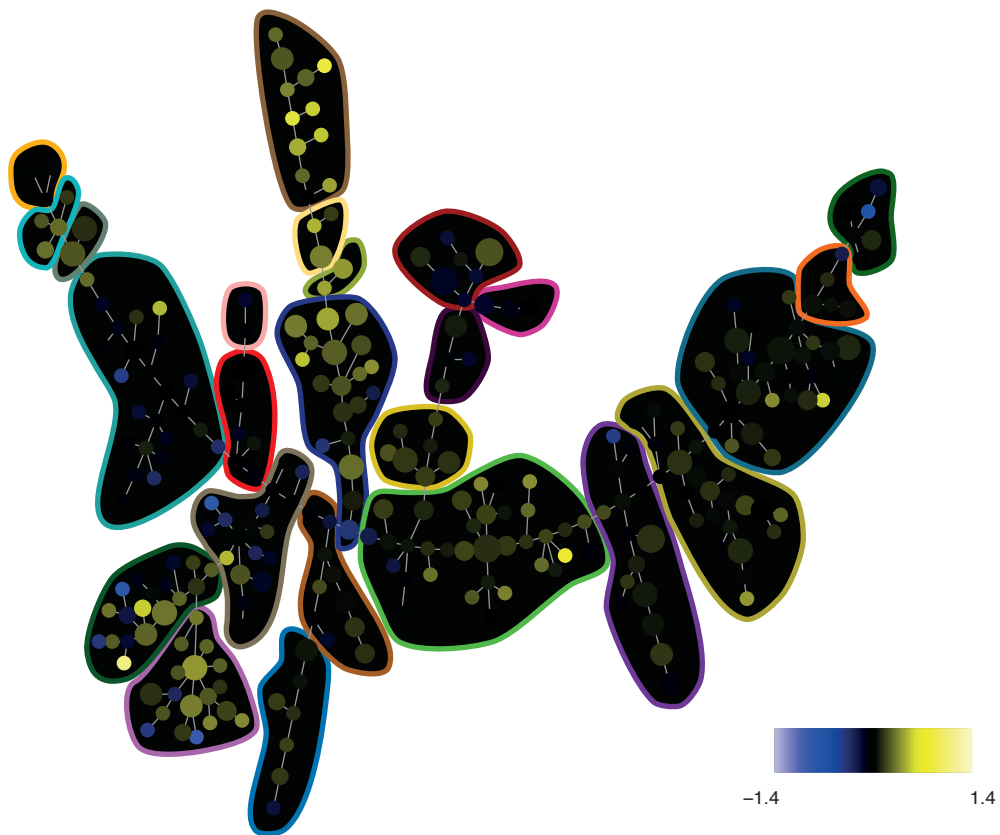

Figure S9C

171-pBtk/Itk ---- JAKi+GCSF vs Ref Ratio

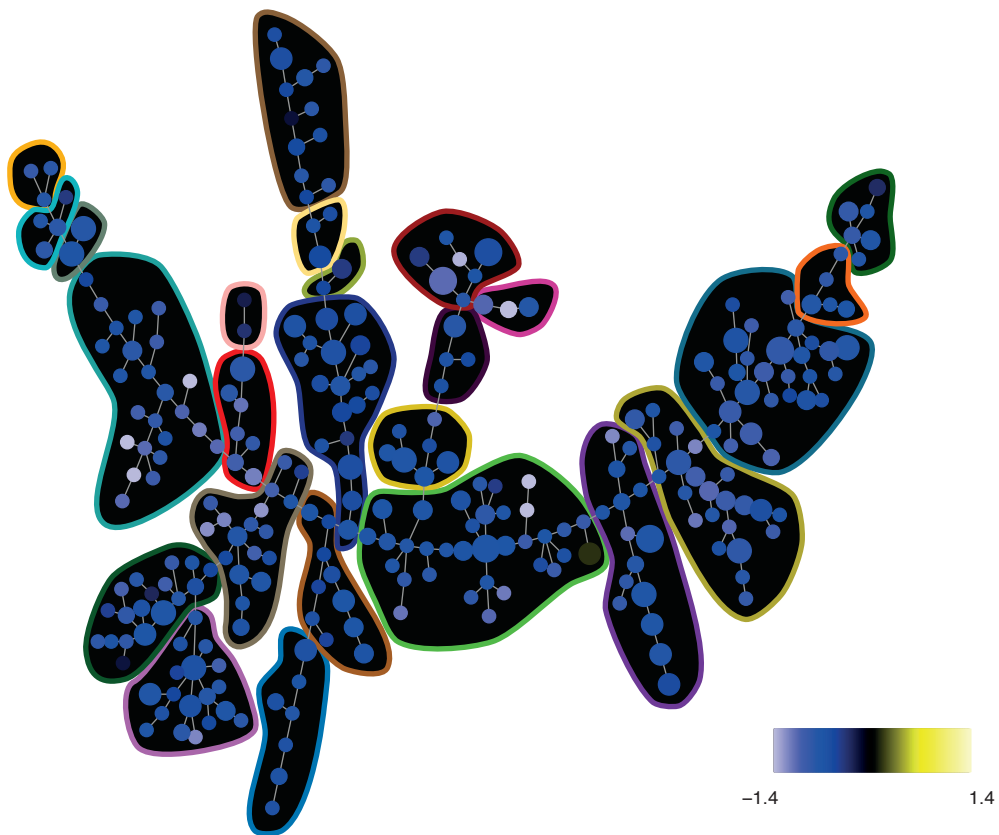

Figure S9C

171-pBtk/Itk ---- JAKi+Unstim vs Ref Ratio

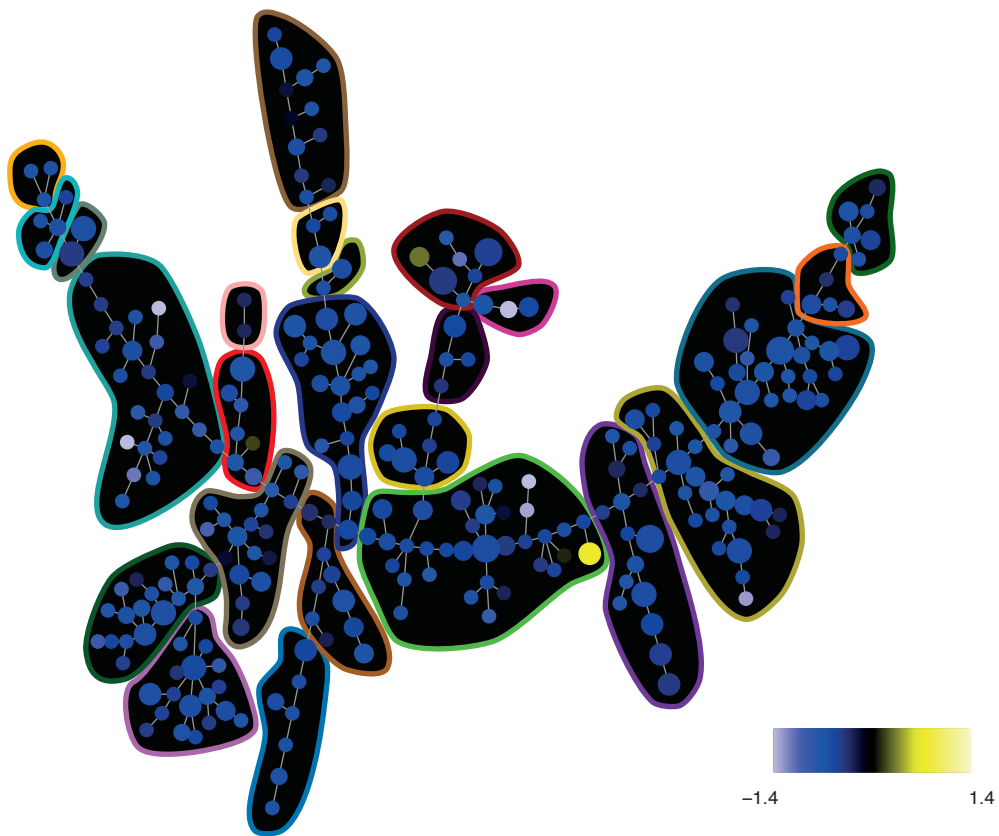



Figure S9C

172-pS6 ---- JAKi+GCSF vs Ref Ratio

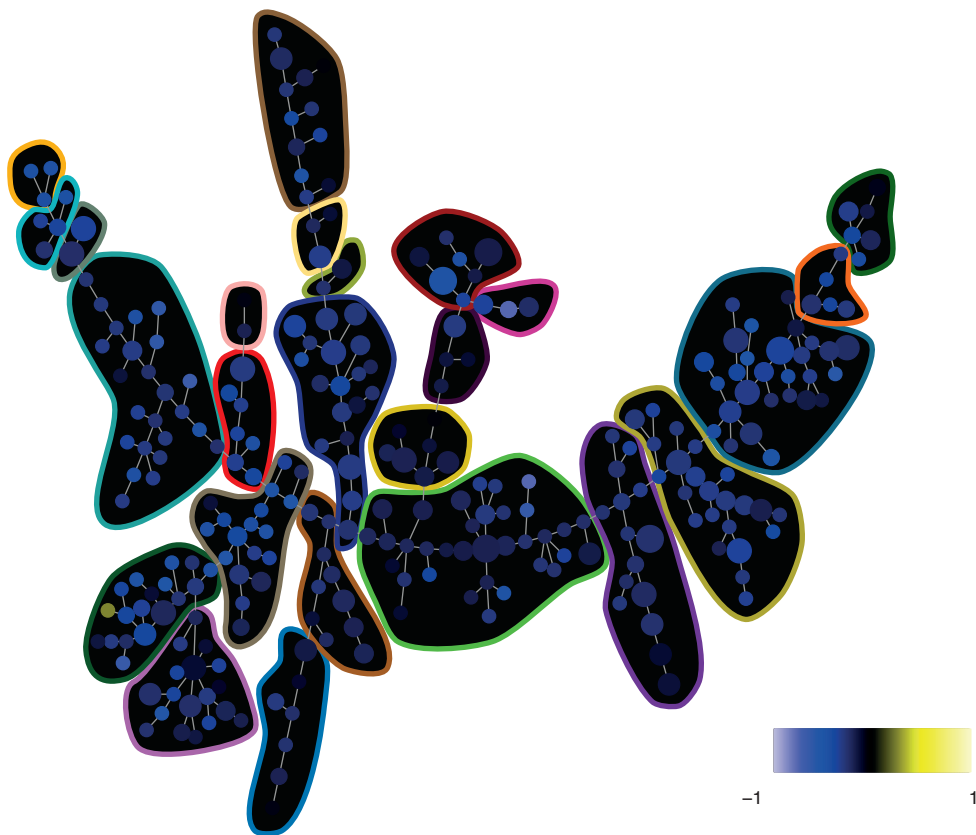

Figure S9C

172-pS6 ---- JAKi+Unstim vs Ref Ratio

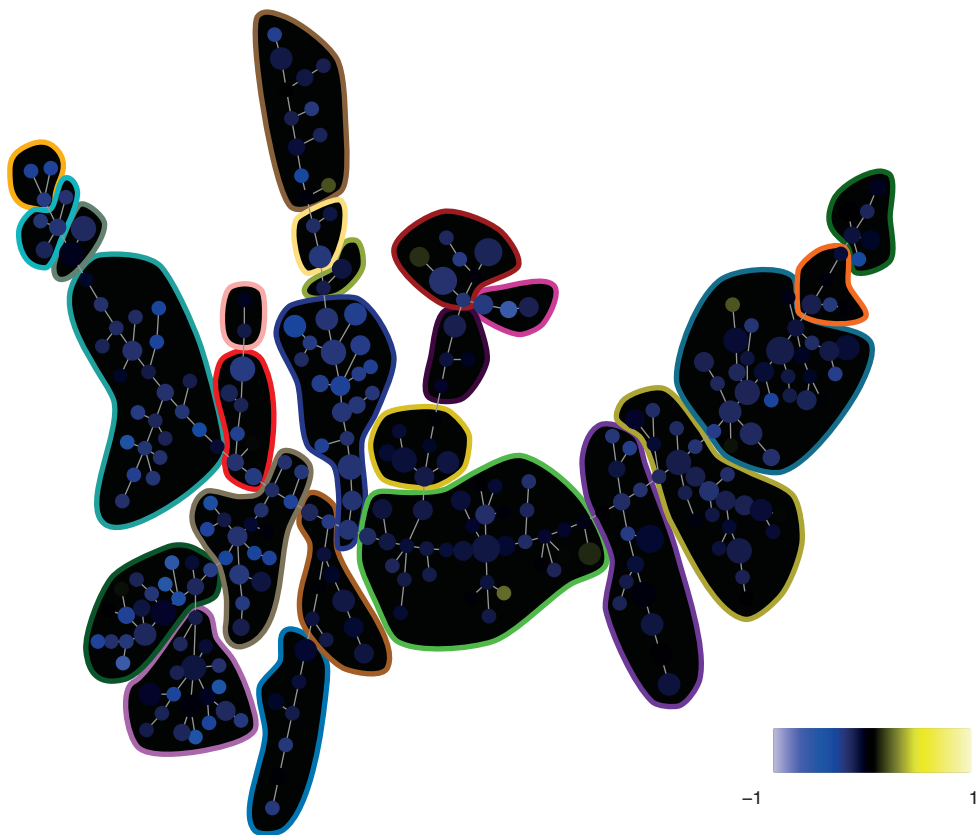

Figure S9C

174-pSrcFK ---- JAKi+GCSF vs Ref Ratio

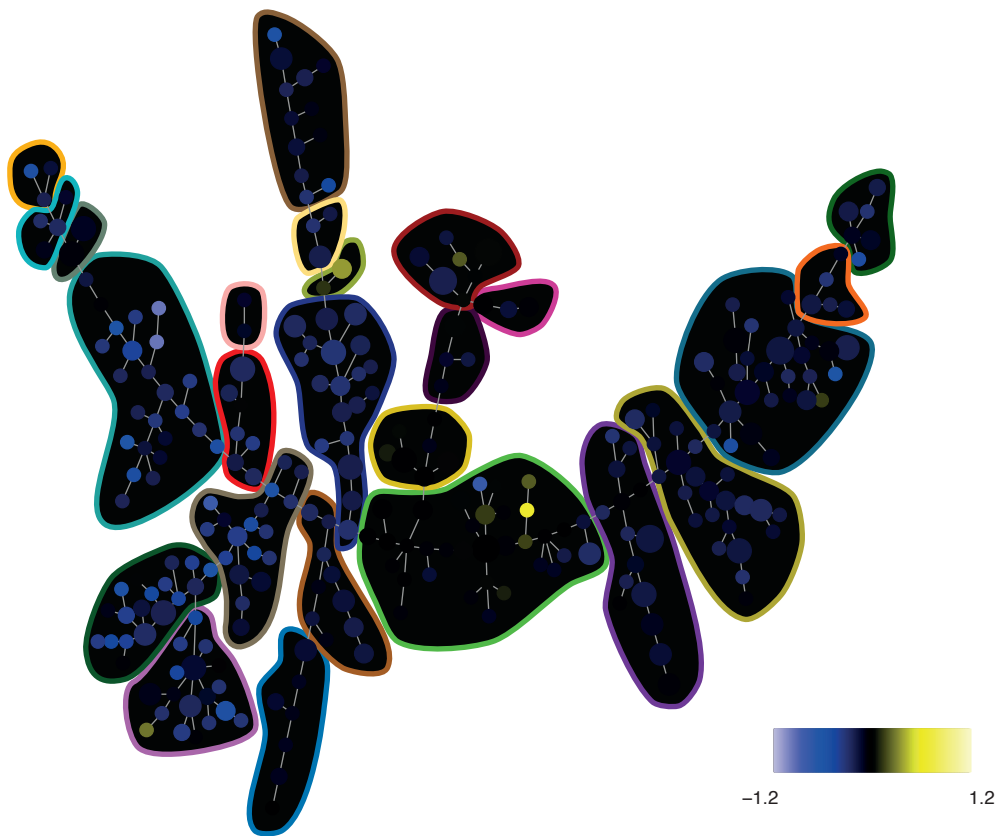

Figure S9C

174-pSrcFK ---- JAKi+Unstim vs Ref Ratio

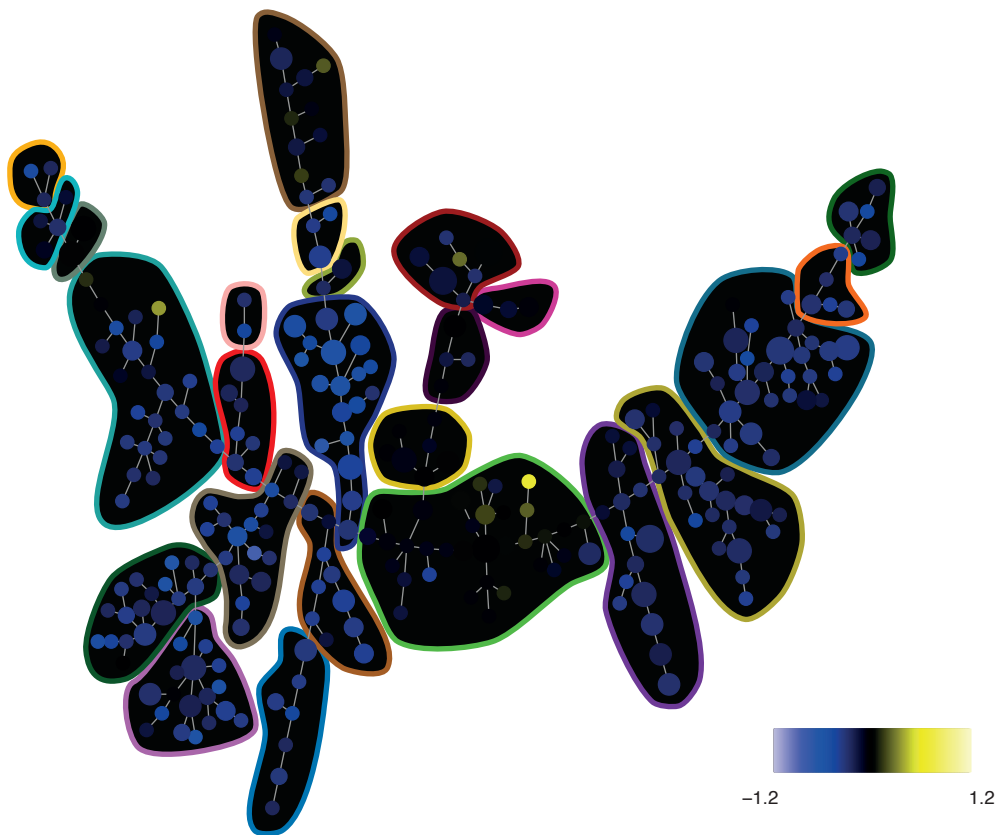

Figure S9C

175-pCrkL ---- JAKi+GCSF vs Ref Ratio

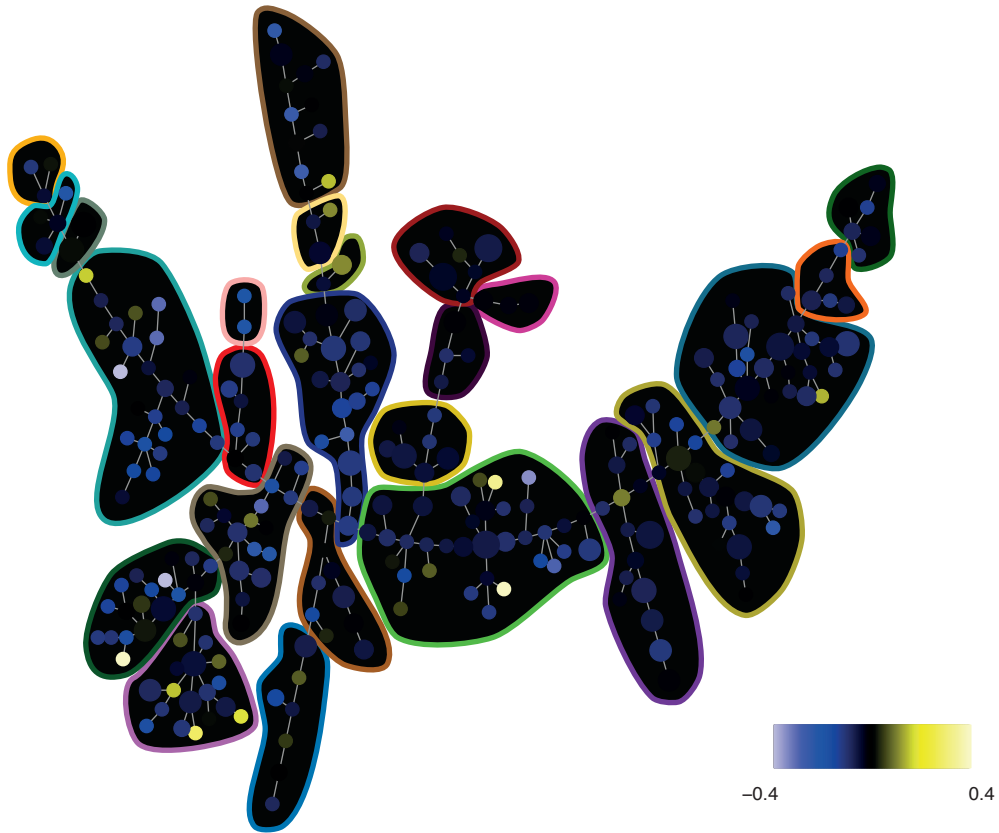

Figure S9C

175-pCrkL ---- JAKi+Unstim vs Ref Ratio

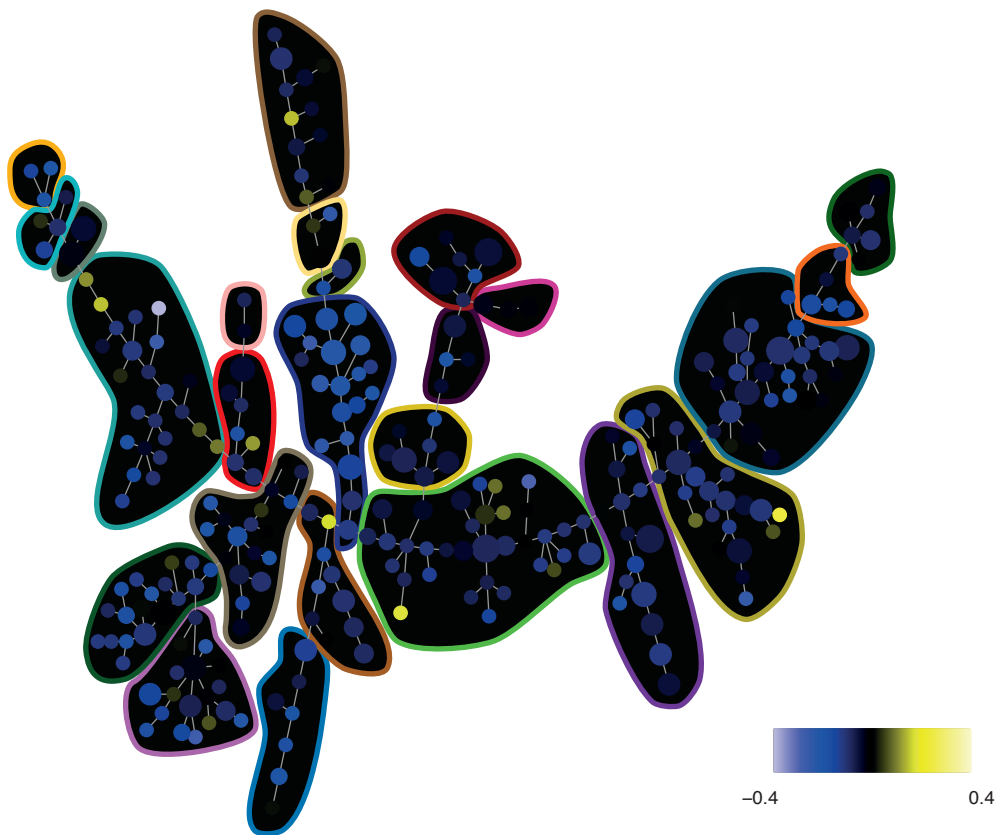

Figure S9C

176-pCREB ---- JAKi+GCSF vs Ref Ratio

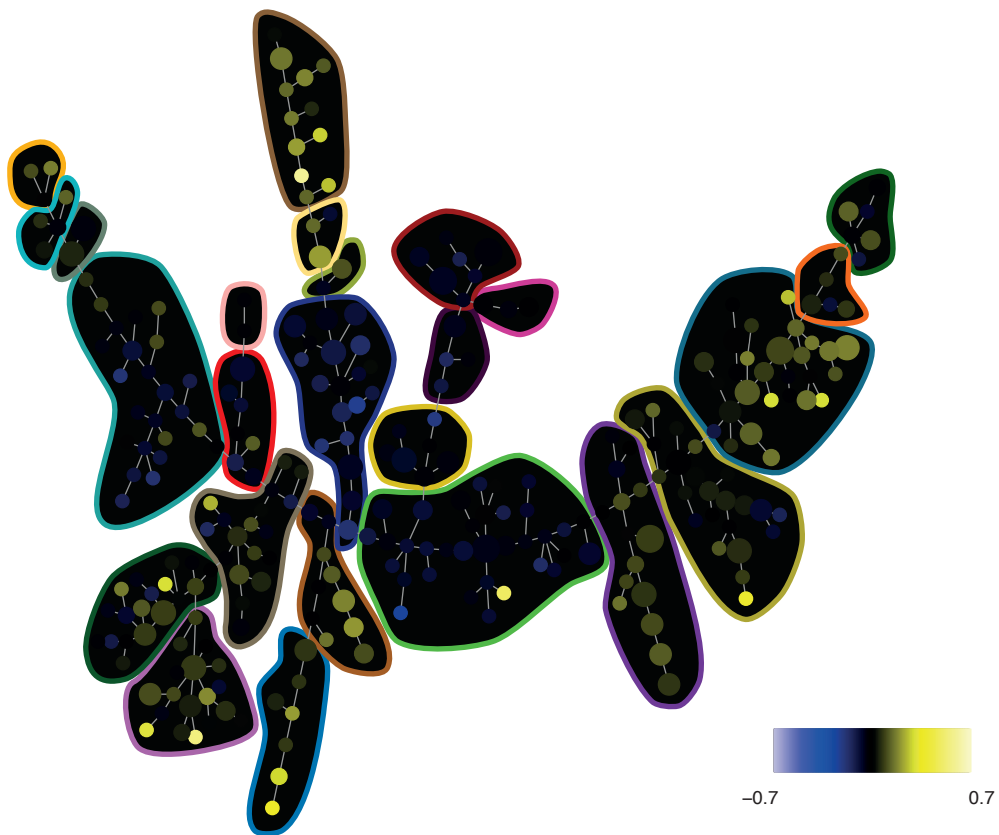

Figure S9C

176-pCREB ---- JAKi+Unstim vs Ref Ratio

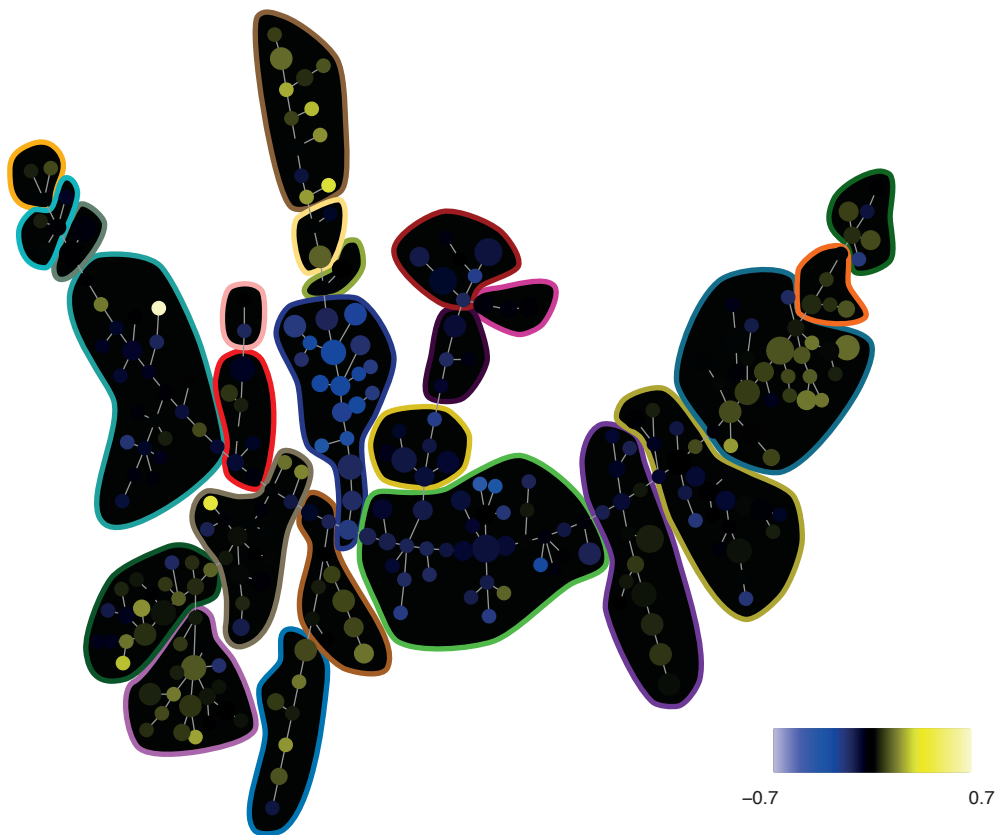



Figure S9D

141-pPLCgamma2 ---- U0126+PMAiono vs Ref Ratio

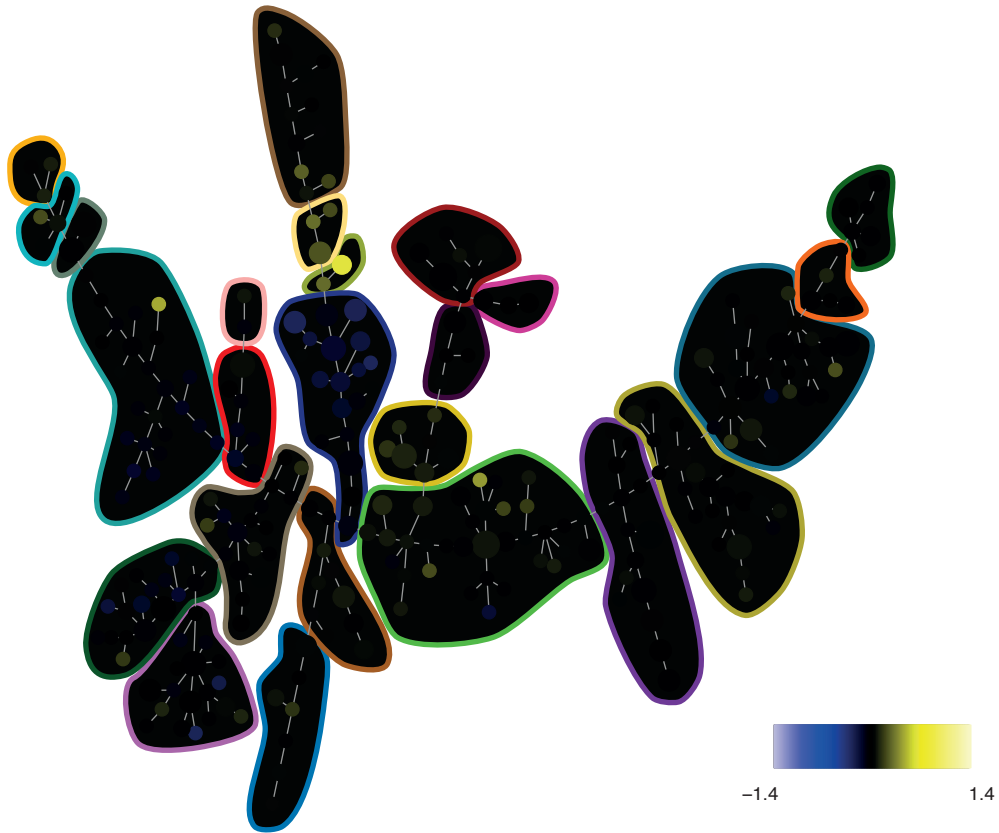

Figure S9D

141-pPLCgamma2 --- U0126+Unstim vs Ref Ratio

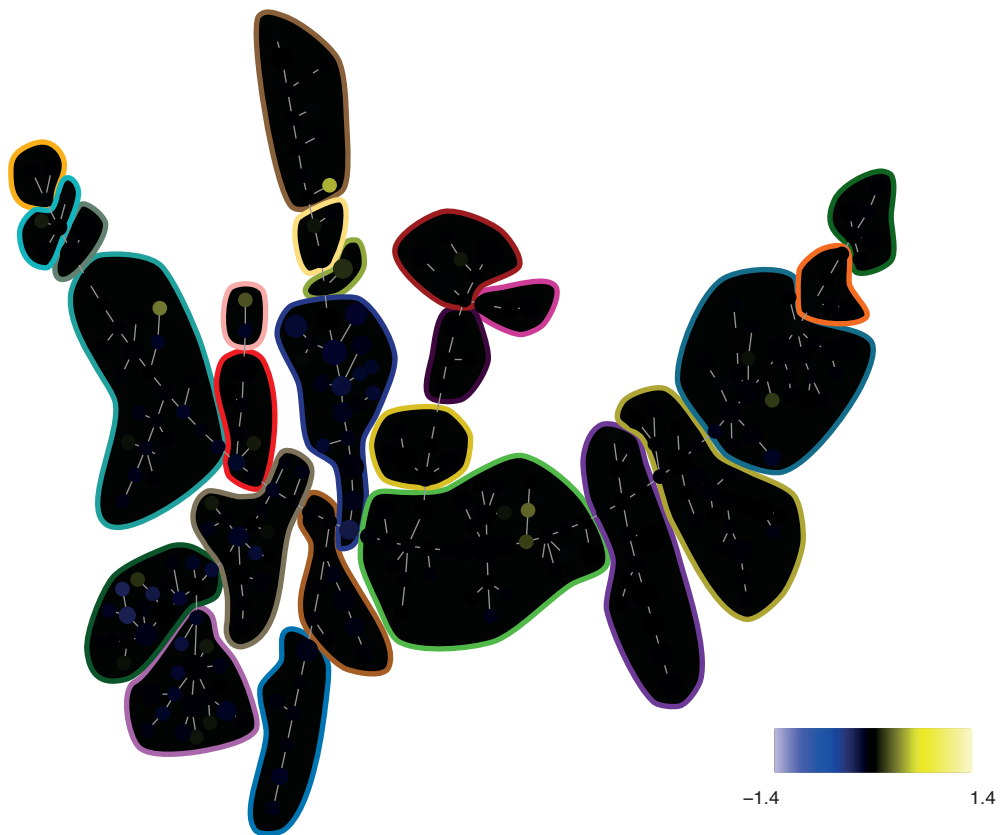

Figure S9D

150-pSTAT5 --- U0126+PMAiono vs Ref Ratio

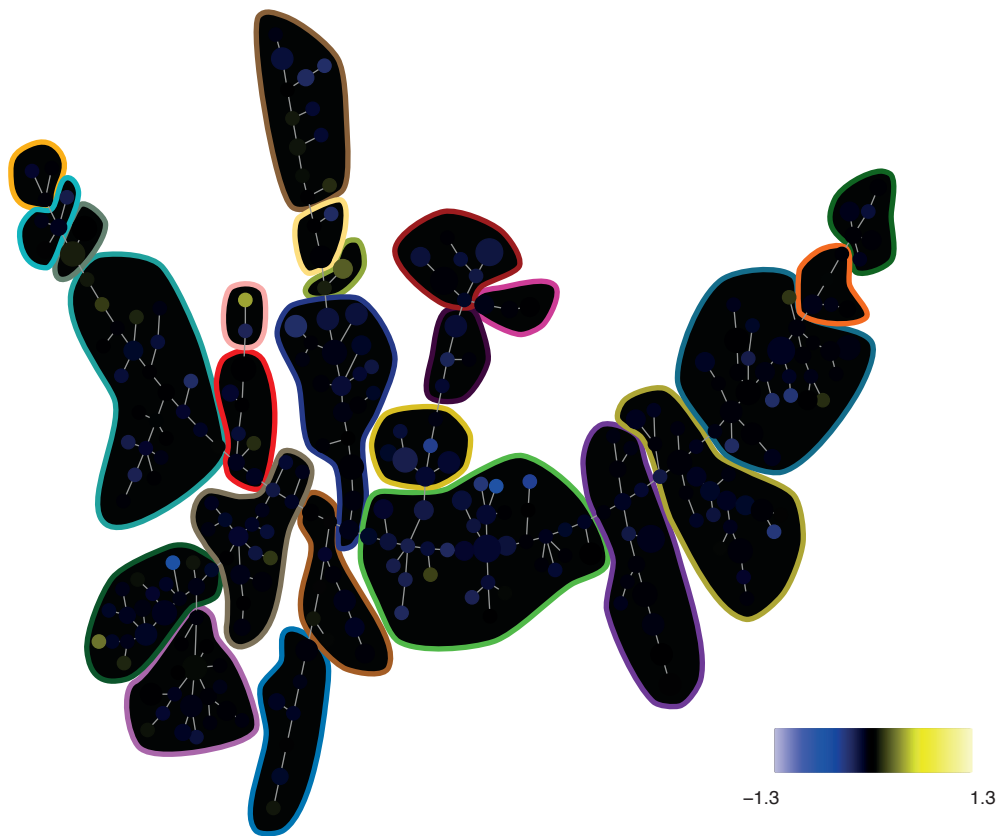

Figure S9D

150-pSTAT5 ---- U0126+Unstim vs Ref Ratio

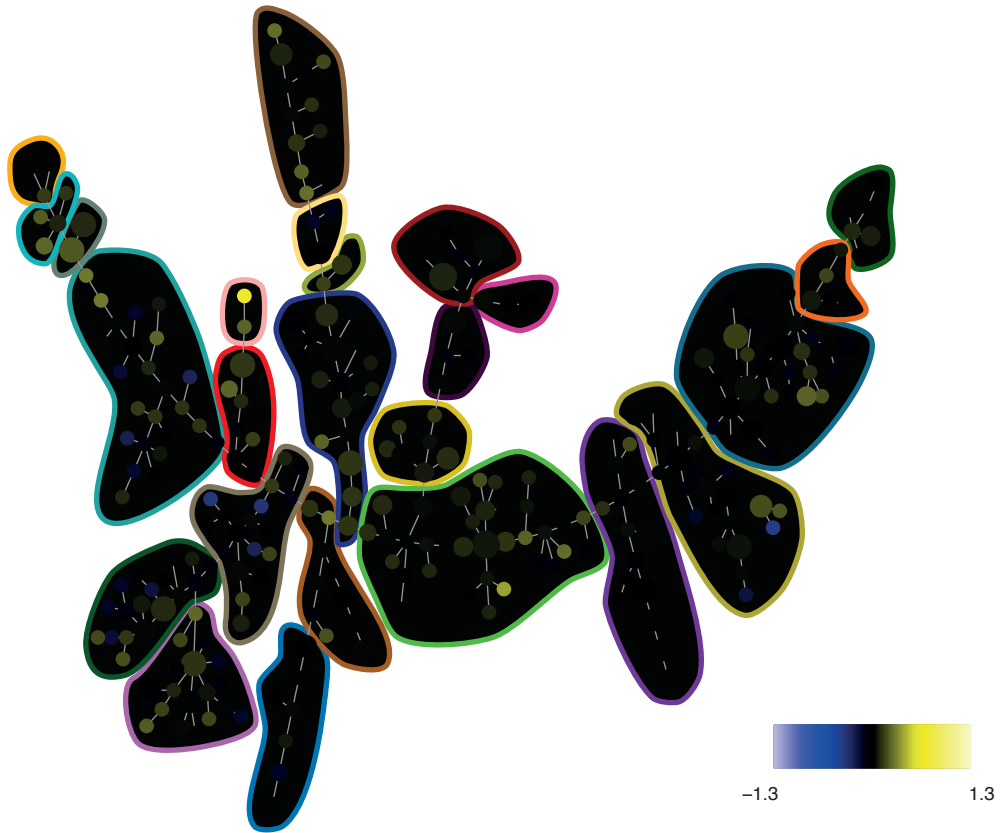

Figure S9D

151-pERK1/2 ---- U0126+PMAiono vs Ref Ratio

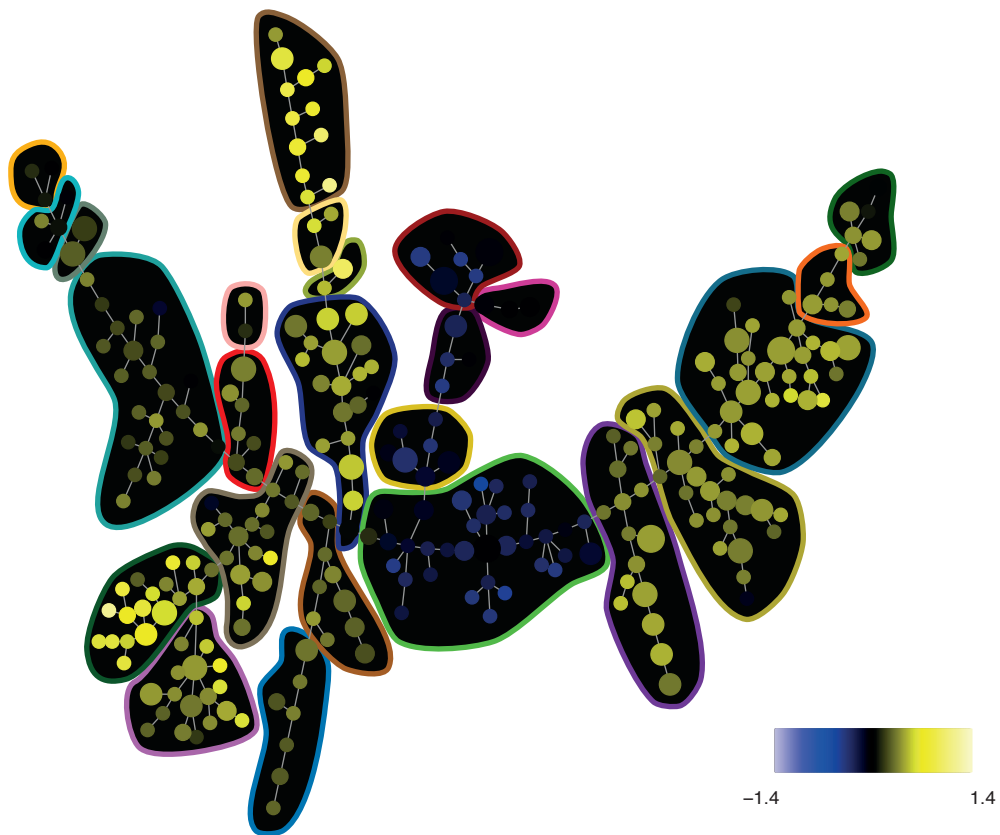

Figure S9D

151-pERK1/2 --- U0126+Unstim vs Ref Ratio

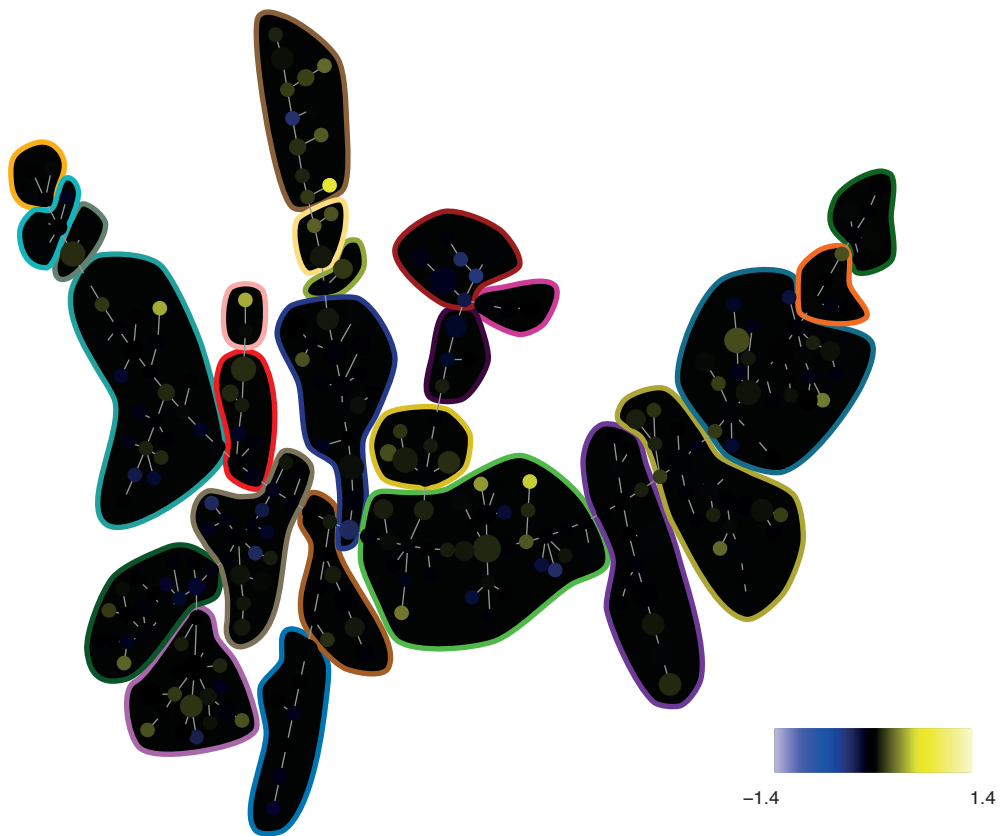

Figure S9D

152-Ki67 ---- U0126+PMAiono vs Ref Ratio

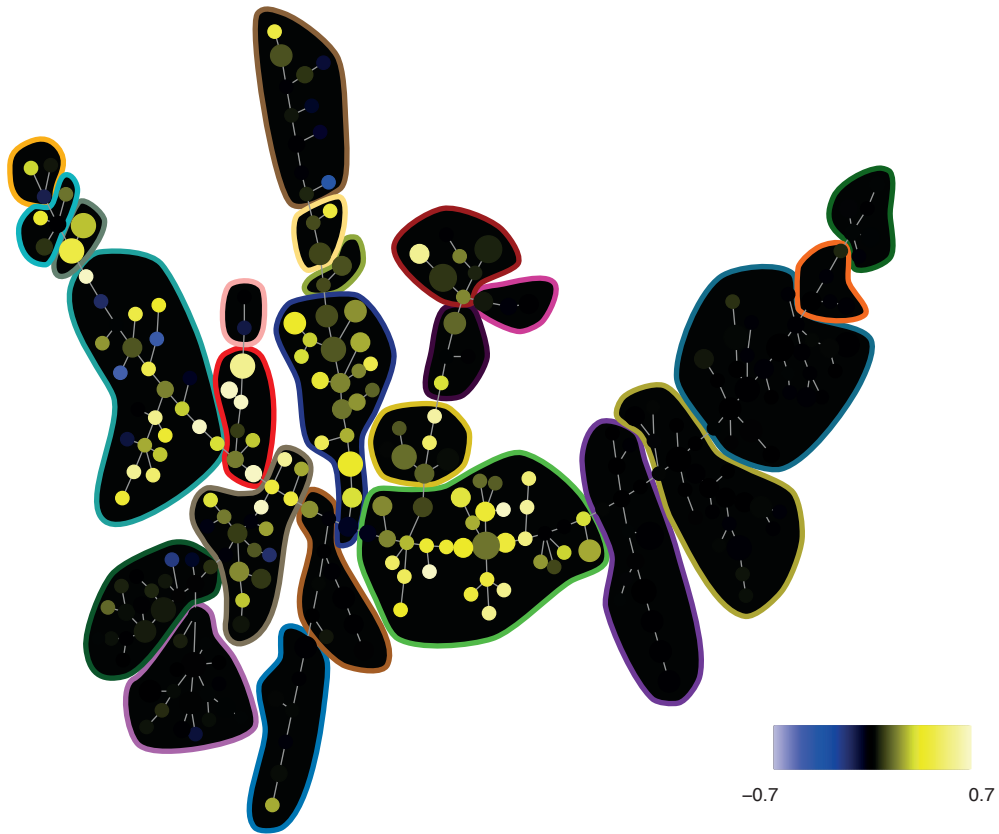

Figure S9D

152-Ki67 ---- U0126+Unstim vs Ref Ratio

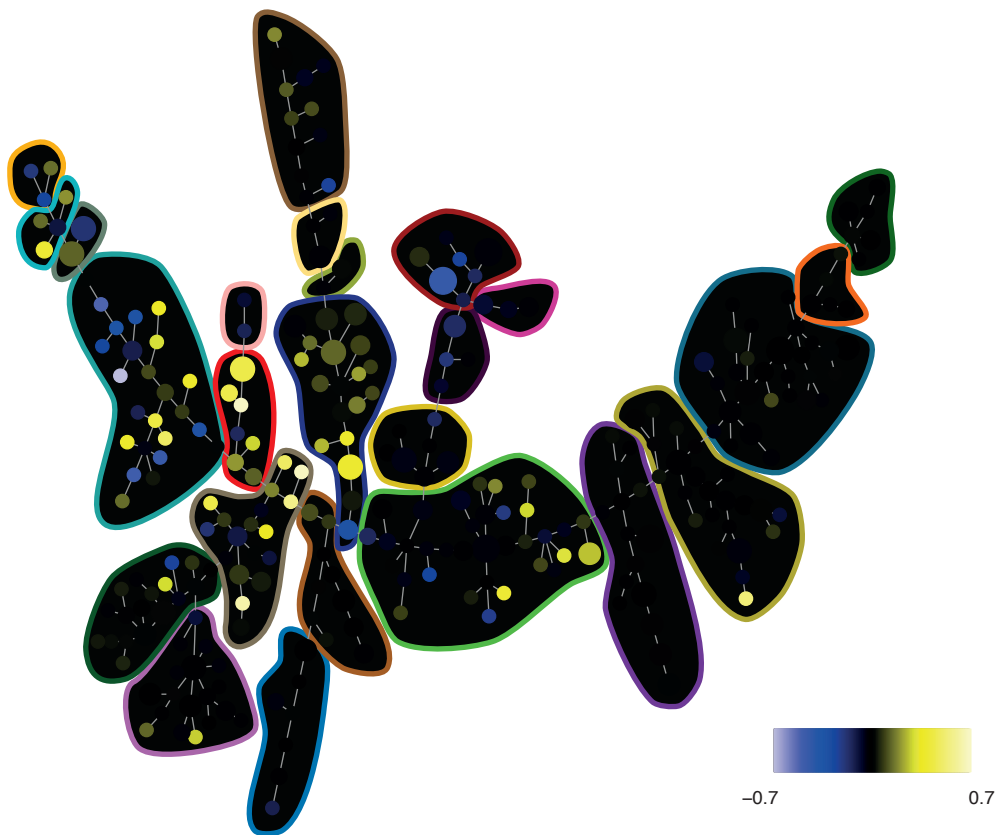



Figure S9D

153-pMAPKAPK2 ---- U0126+PMAiono vs Ref Ratio

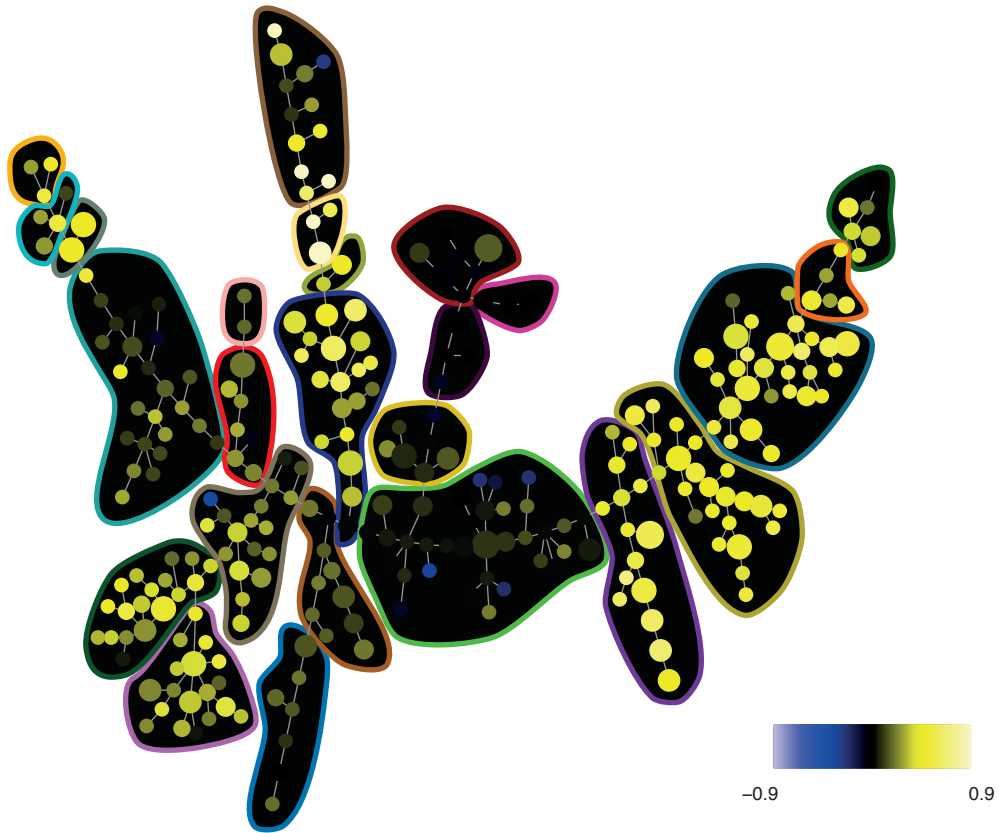

Figure S9D

153-pMAPKAPK2 ---- U0126+Unstim vs Ref Ratio

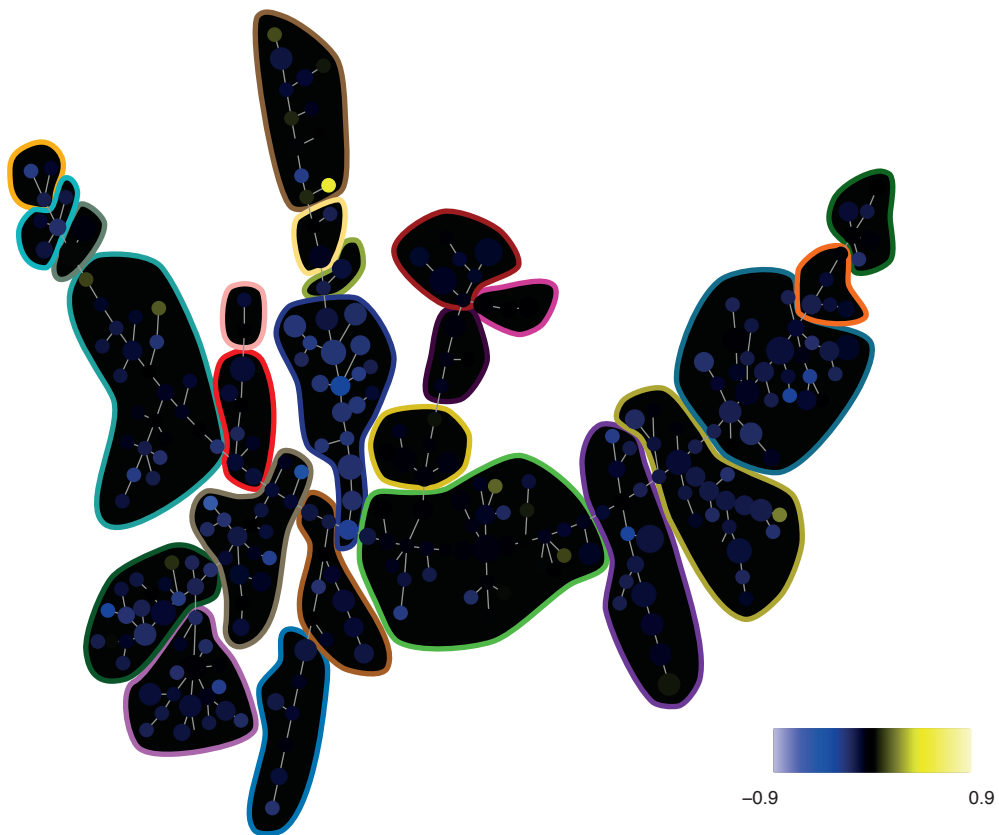

Figure S9D

154-pSHP2 --- U0126+PMAiono vs Ref Ratio

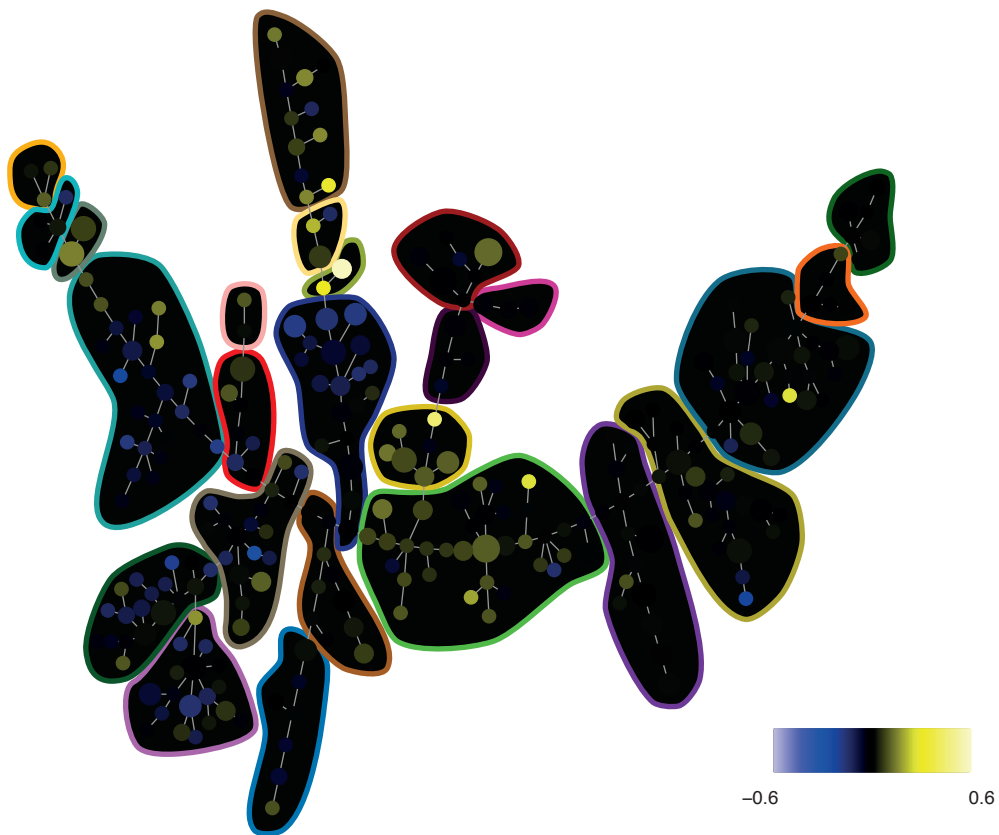

Figure S9D

154-pSHP2 ---- U0126+Unstim vs Ref Ratio

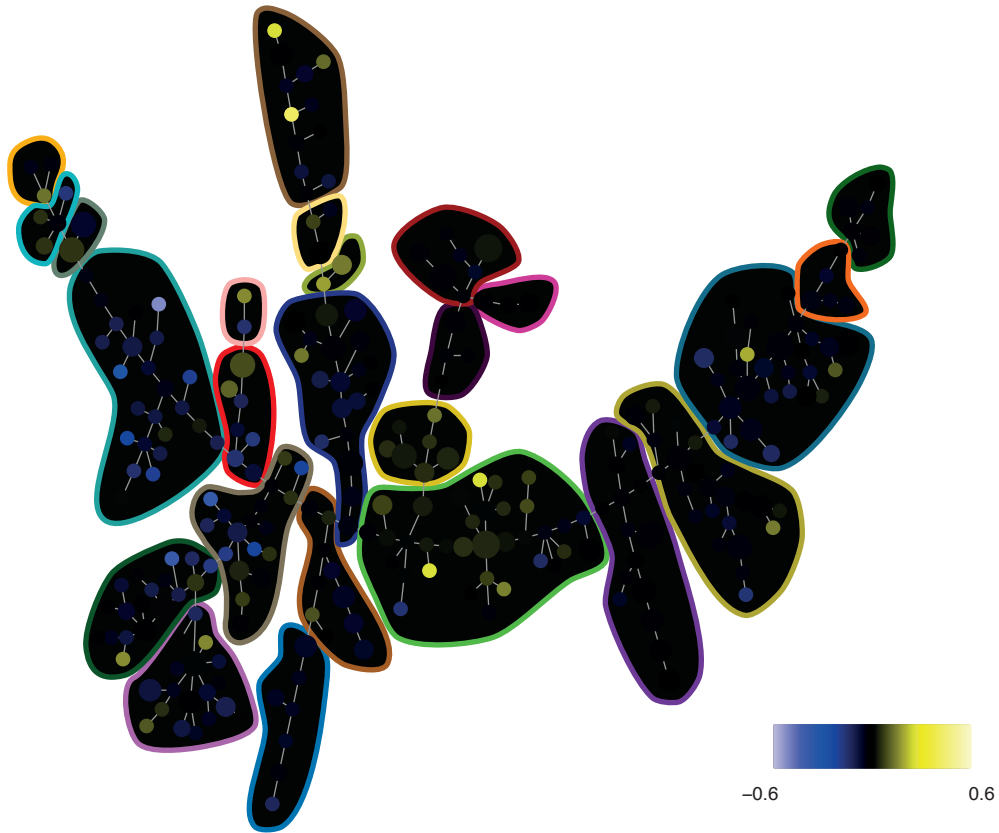

Figure S9D

156-pZAP70/Syk ---- U0126+PMAiono vs Ref Ratio

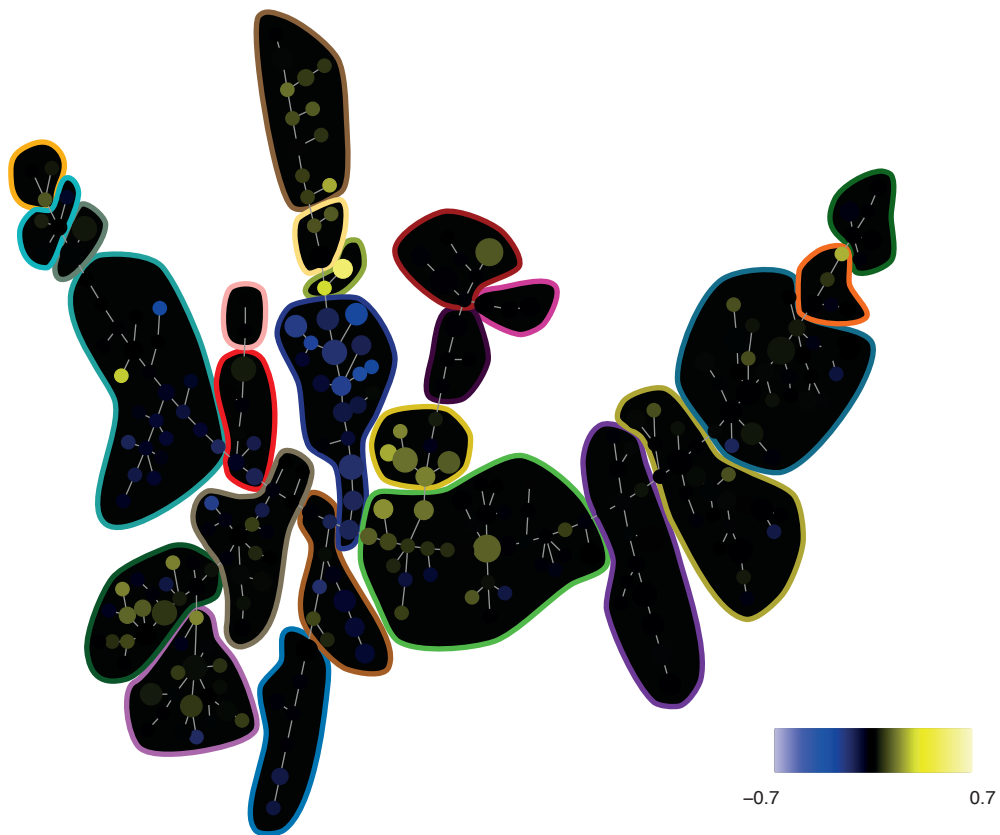

Figure S9D

156-pZAP70/Syk ---- U0126+Unstim vs Ref Ratio

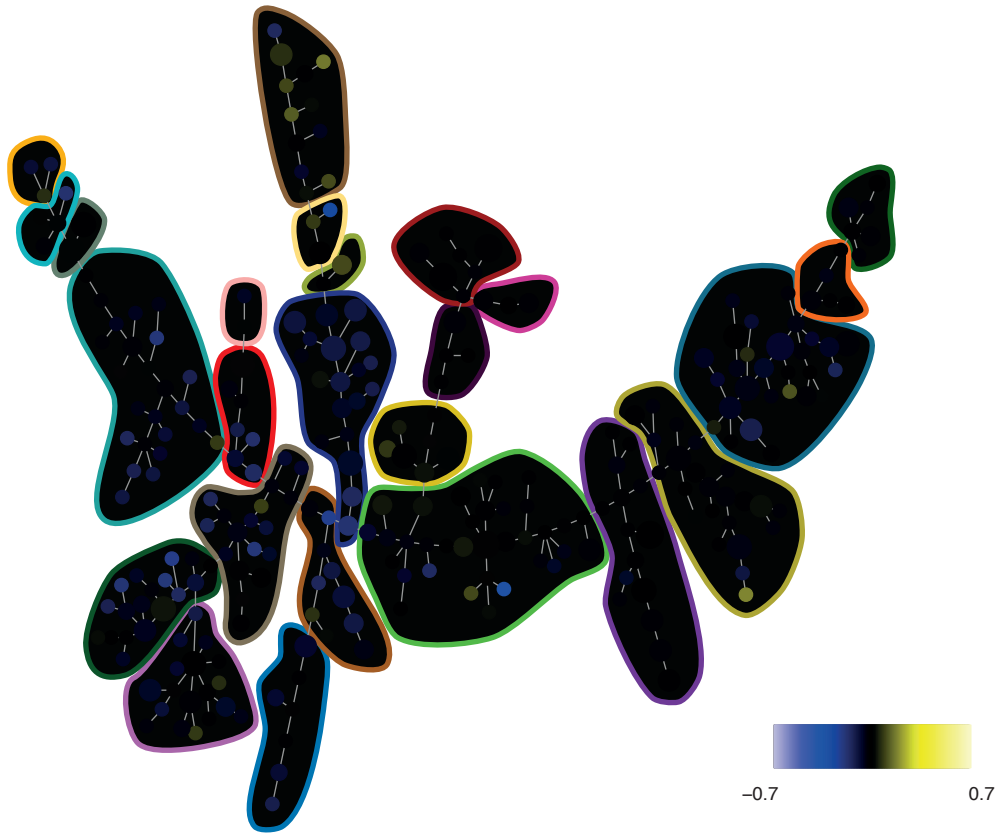

Figure S9D

159-pSTAT3 --- U0126+PMAiono vs Ref Ratio

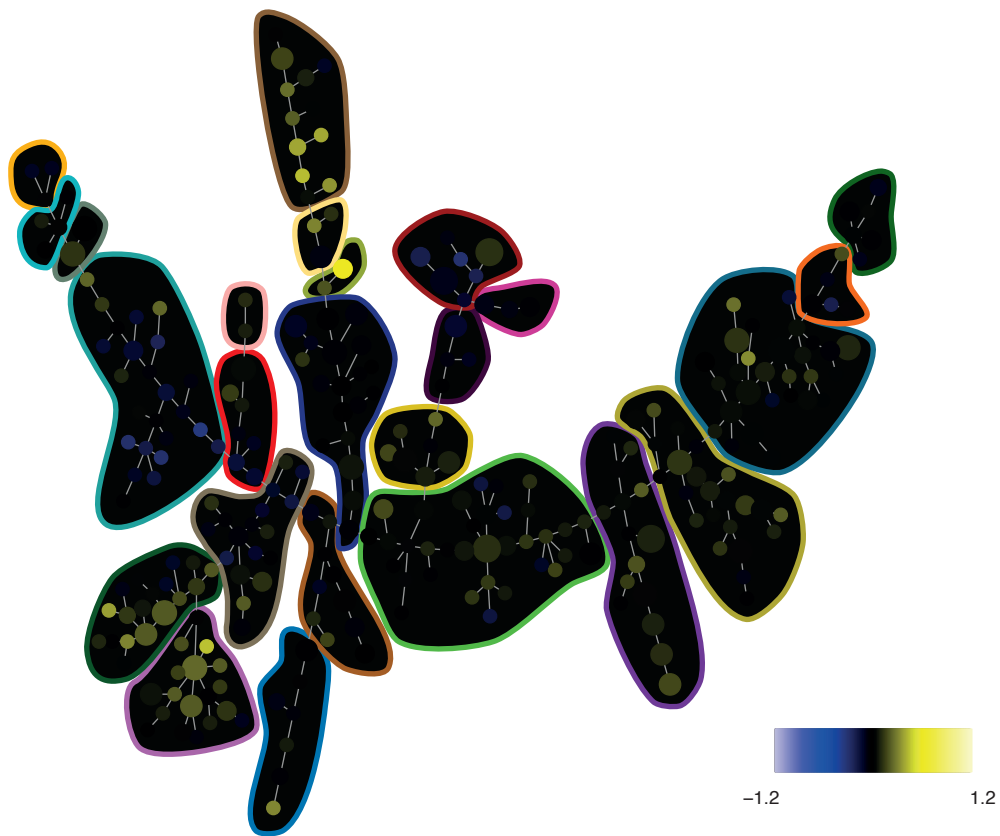

Figure S9D

159-pSTAT3 ---- U0126+Unstim vs Ref Ratio

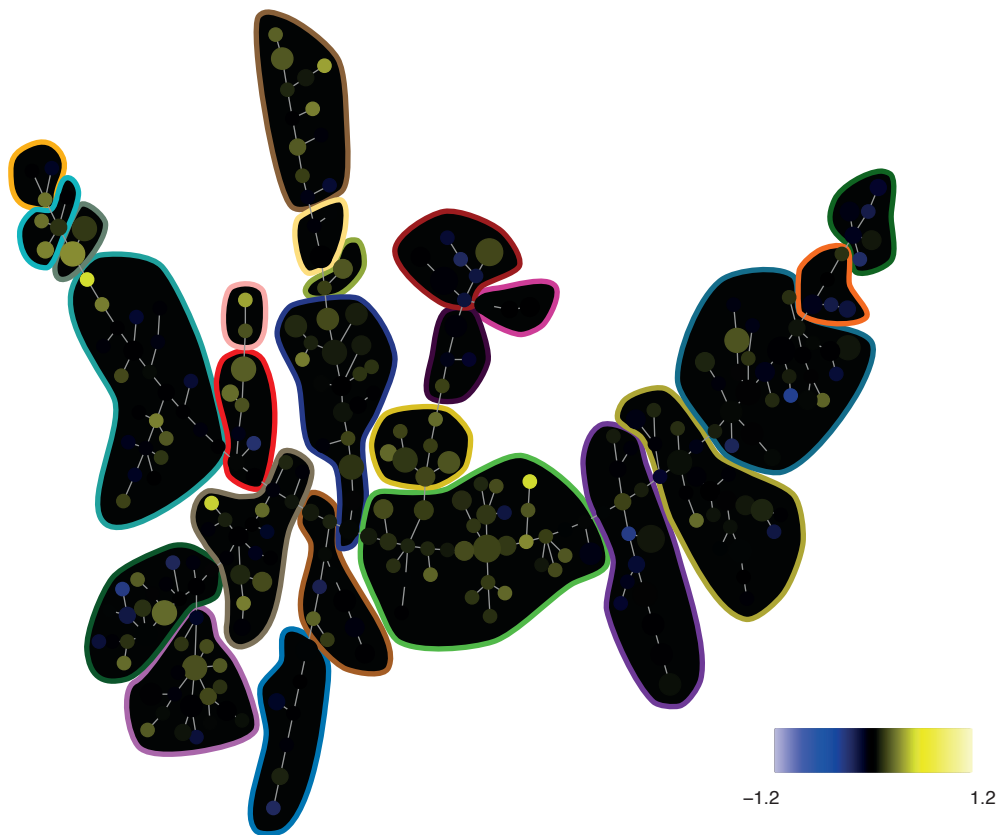



Figure S9D

164-pSLP-76 ---- U0126+PMAiono vs Ref Ratio

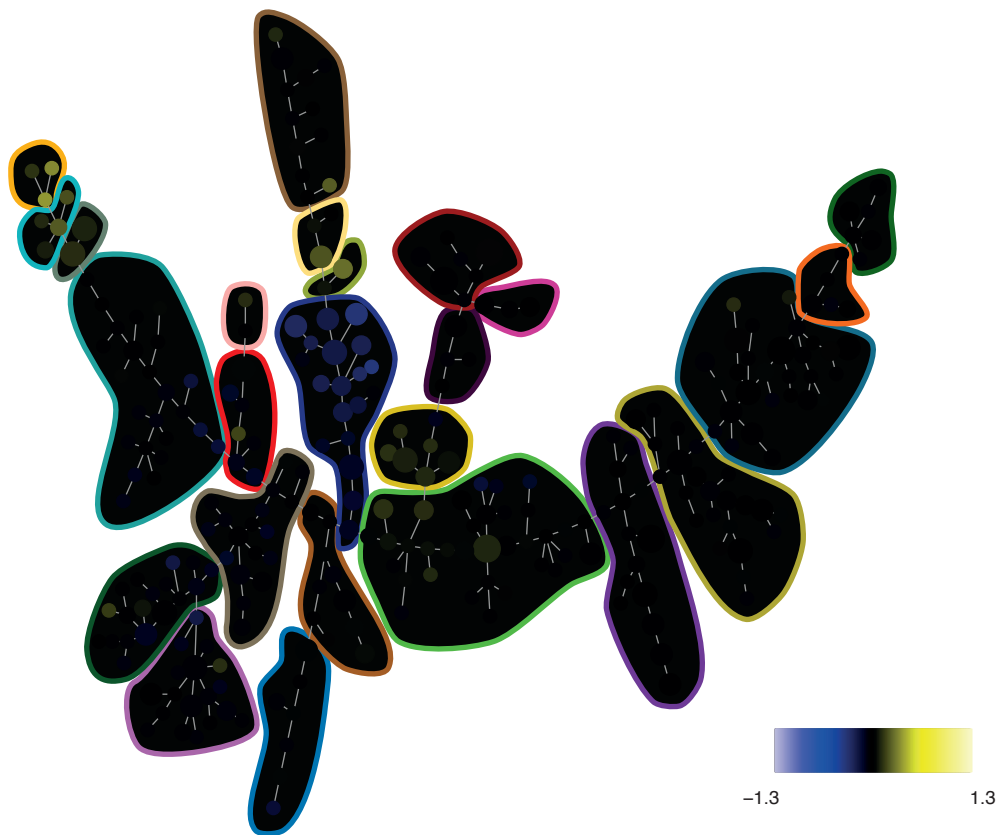

Figure S9D

164-pSLP-76 --- U0126+Unstim vs Ref Ratio

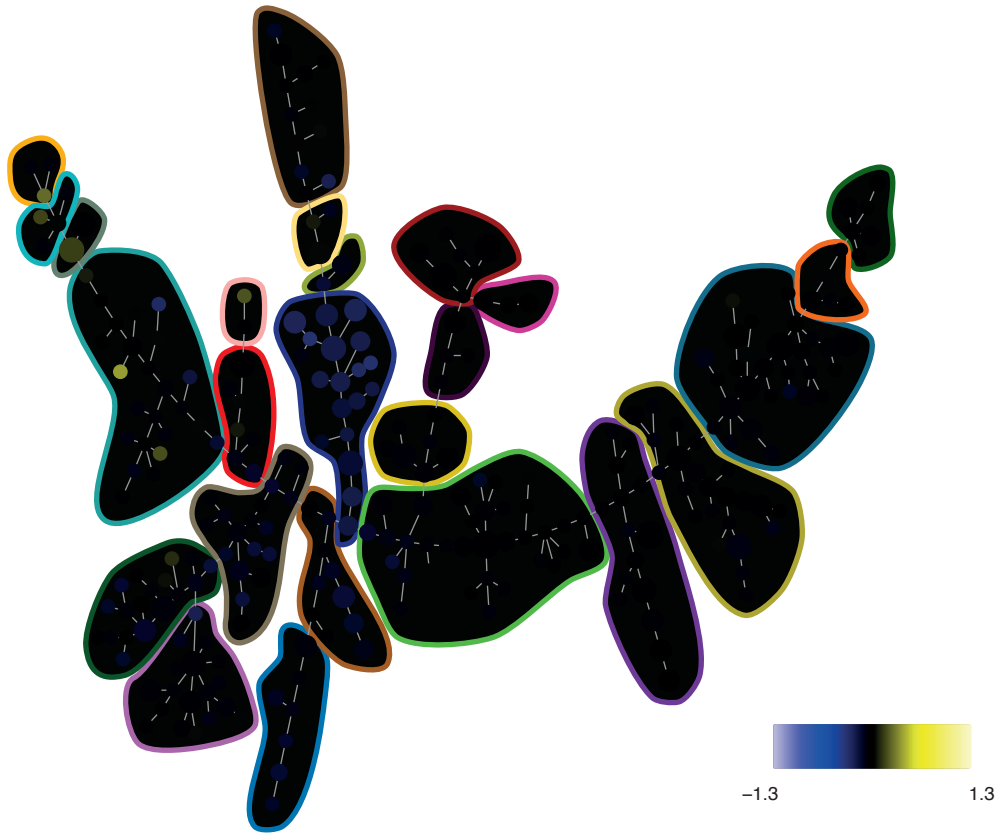

Figure S9D

165-pNFkB ---- U0126+PMAiono vs Ref Ratio

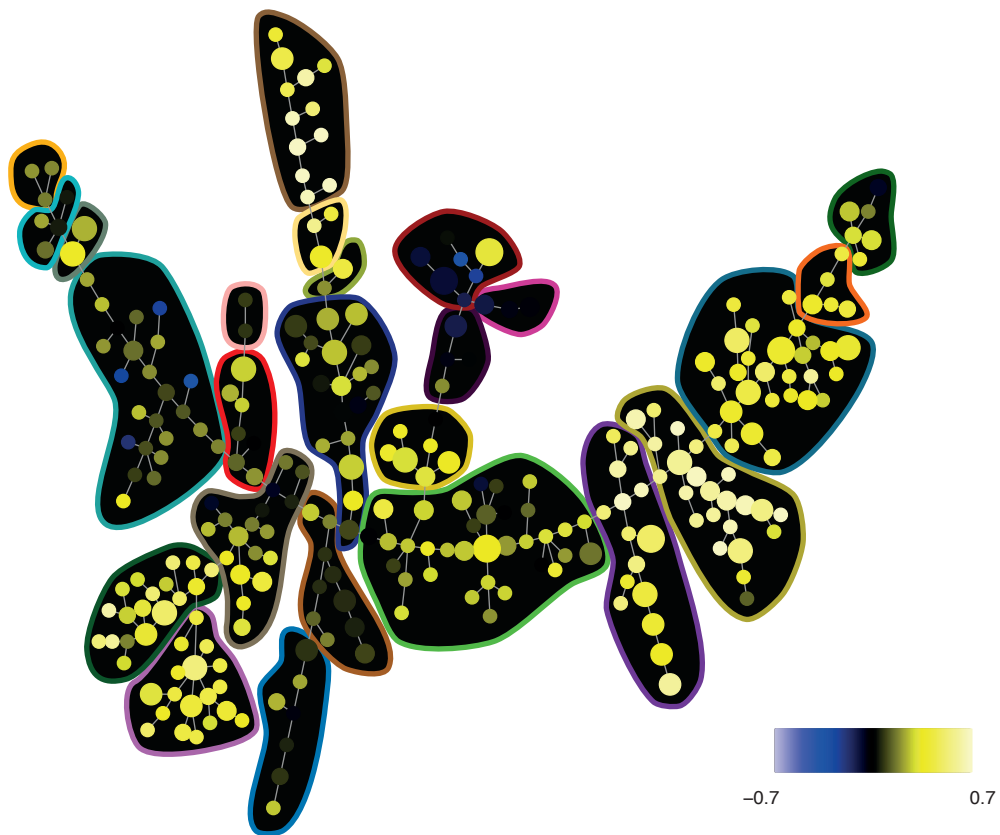

Figure S9D

165-pNFkB ---- U0126+Unstim vs Ref Ratio

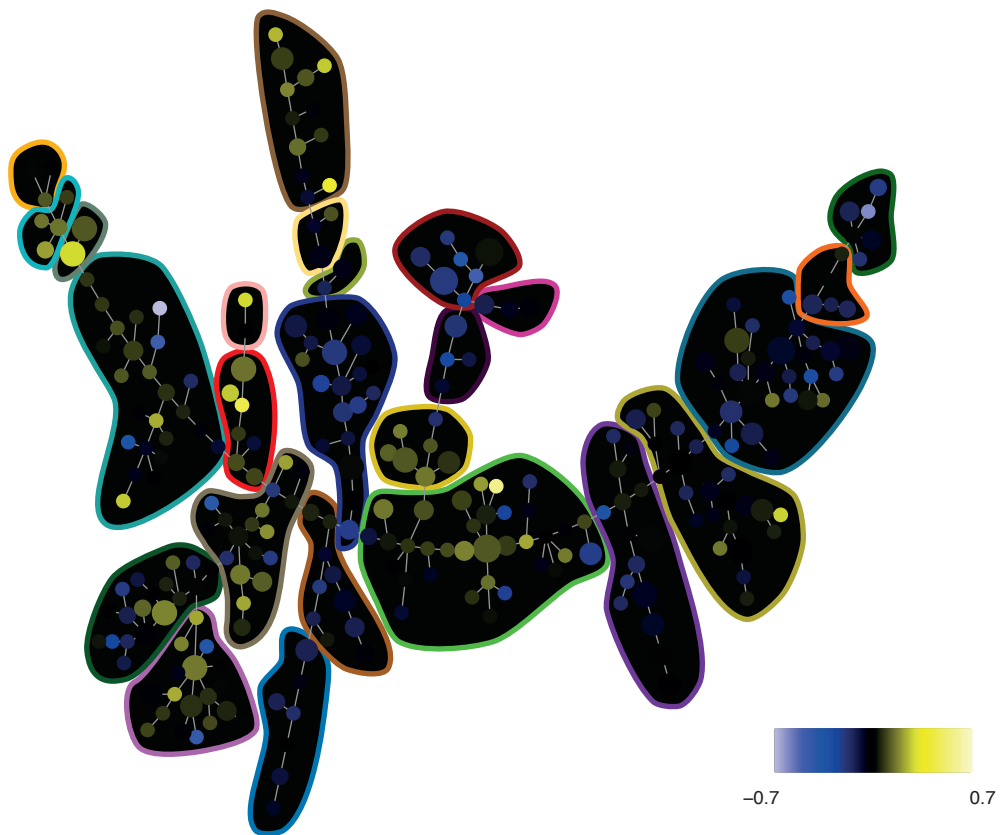

Figure S9D

166-IkBaIpha --- U0126+PMAiono vs Ref Ratio

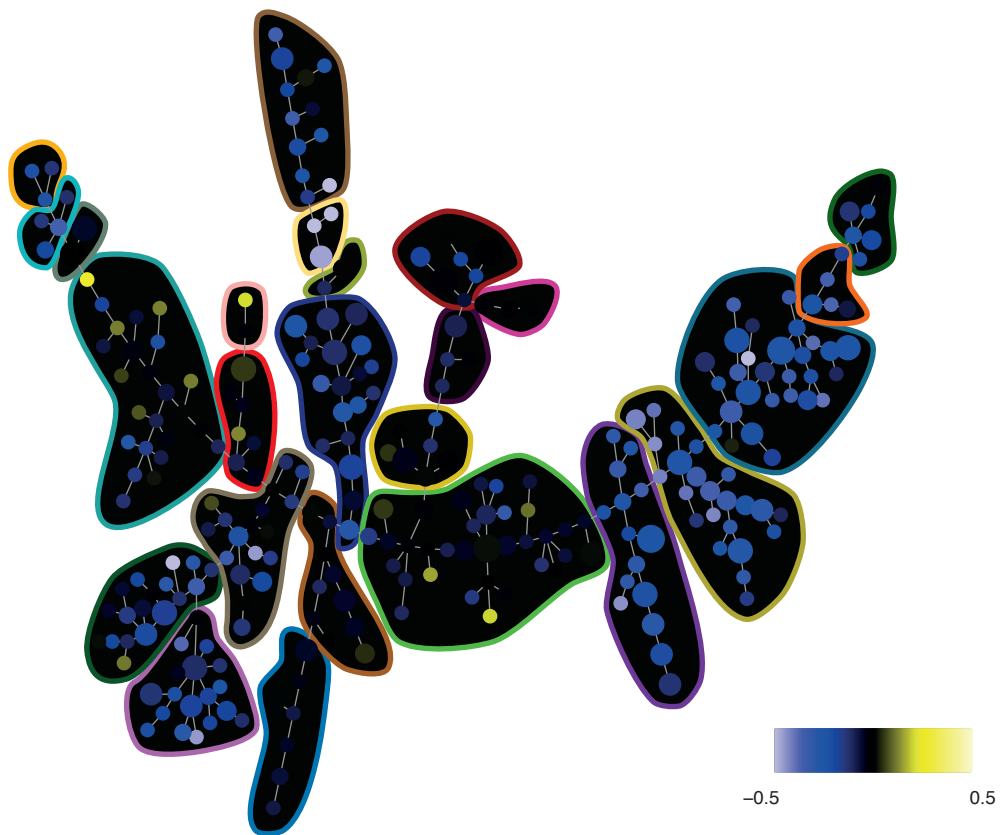

Figure S9D

166-IkBalpha ---- U0126+Unstim vs Ref Ratio

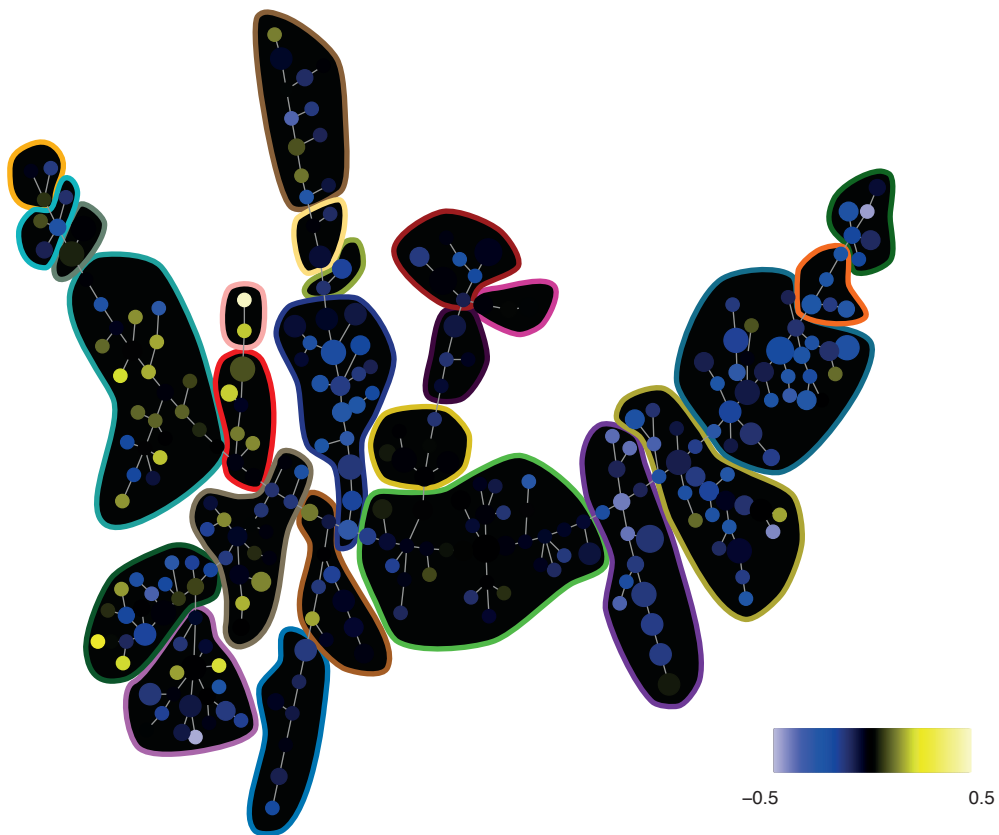

Figure S9D

168-pH3 ---- U0126+PMAiono vs Ref Ratio

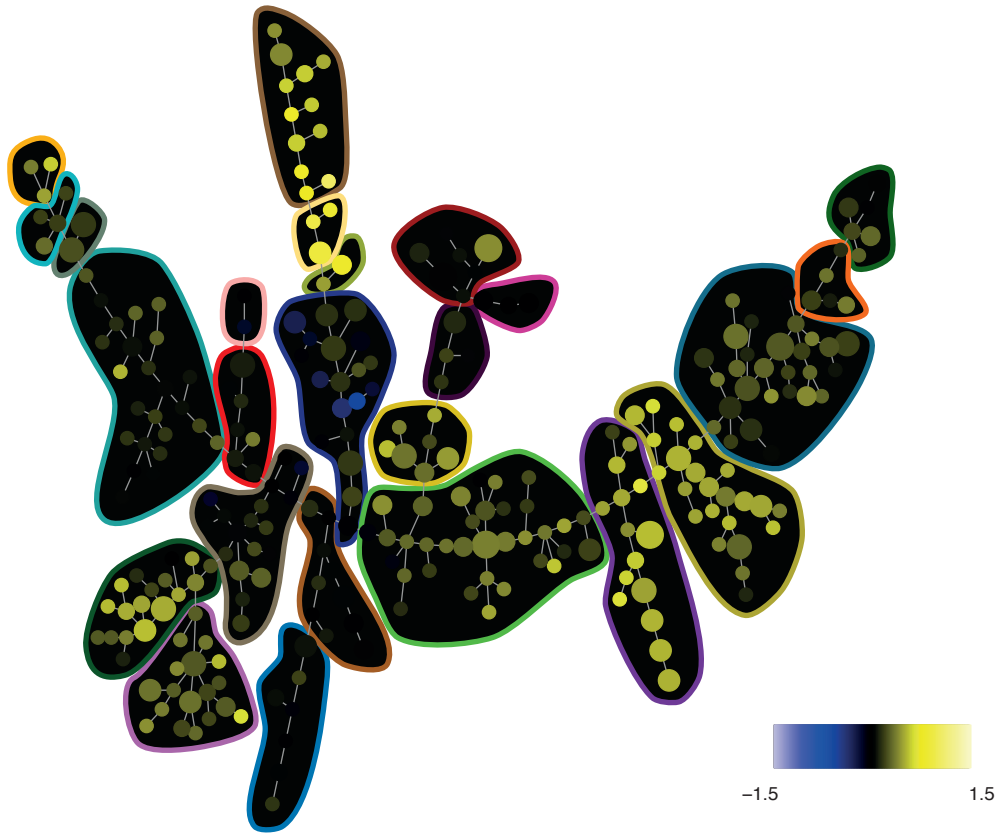

Figure S9D

168-pH3 --- U0126+Unstim vs Ref Ratio

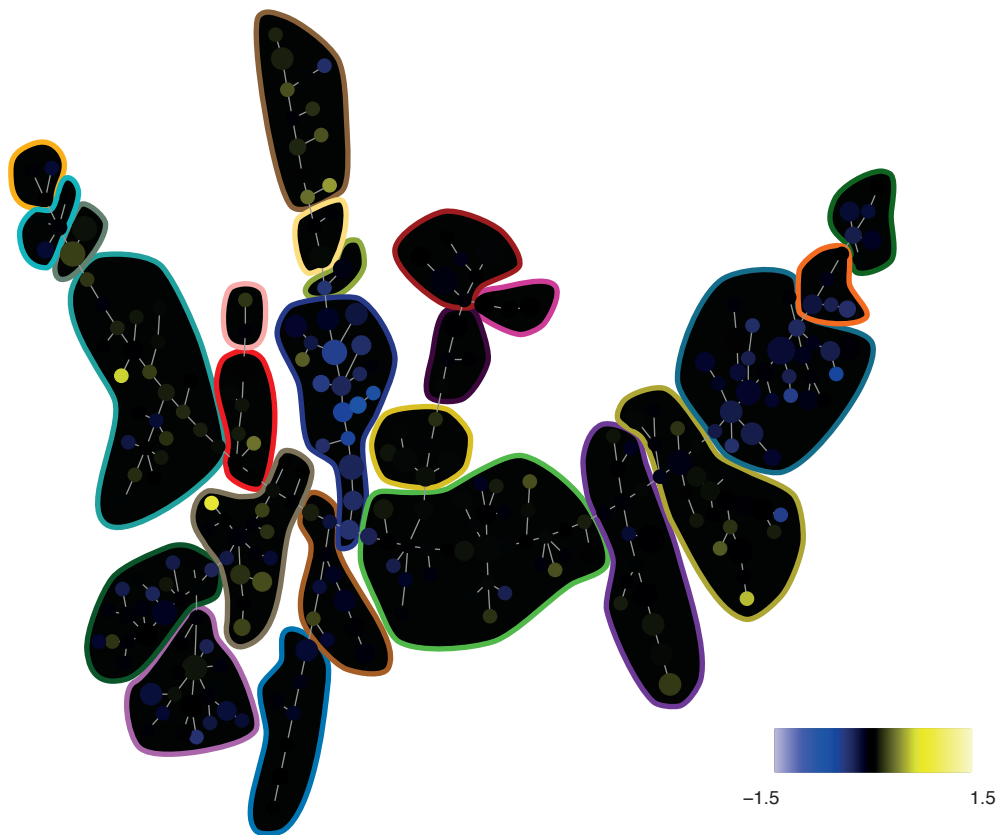



Figure S9D

169-pP38 — U0126+PMAiono vs Ref Ratio

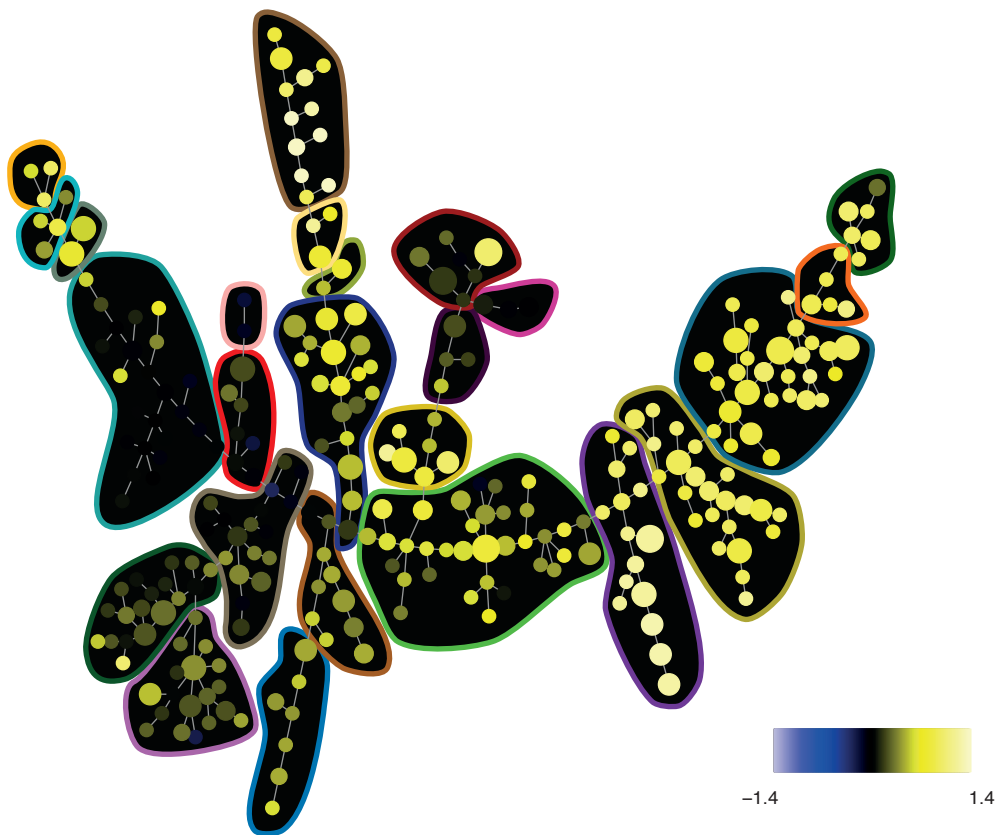

Figure S9D

169-pP38 ---- U0126+Unstim vs Ref Ratio

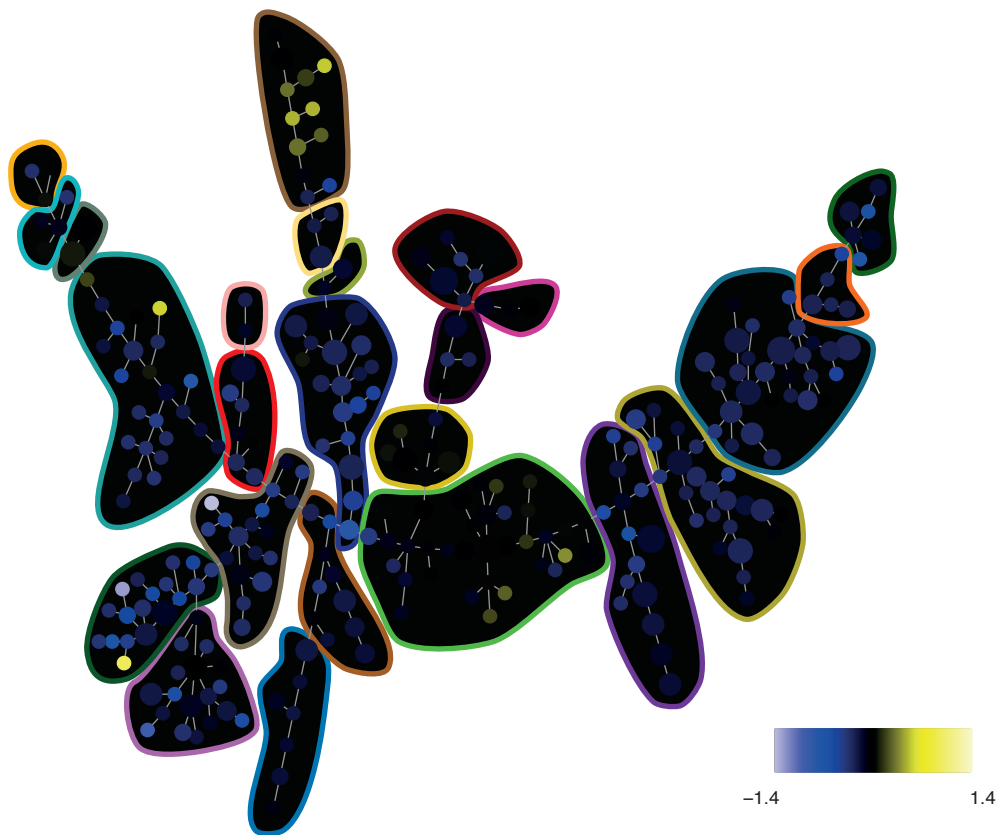

Figure S9D

171-pBtk/Itk ---- U0126+PMAiono vs Ref Ratio

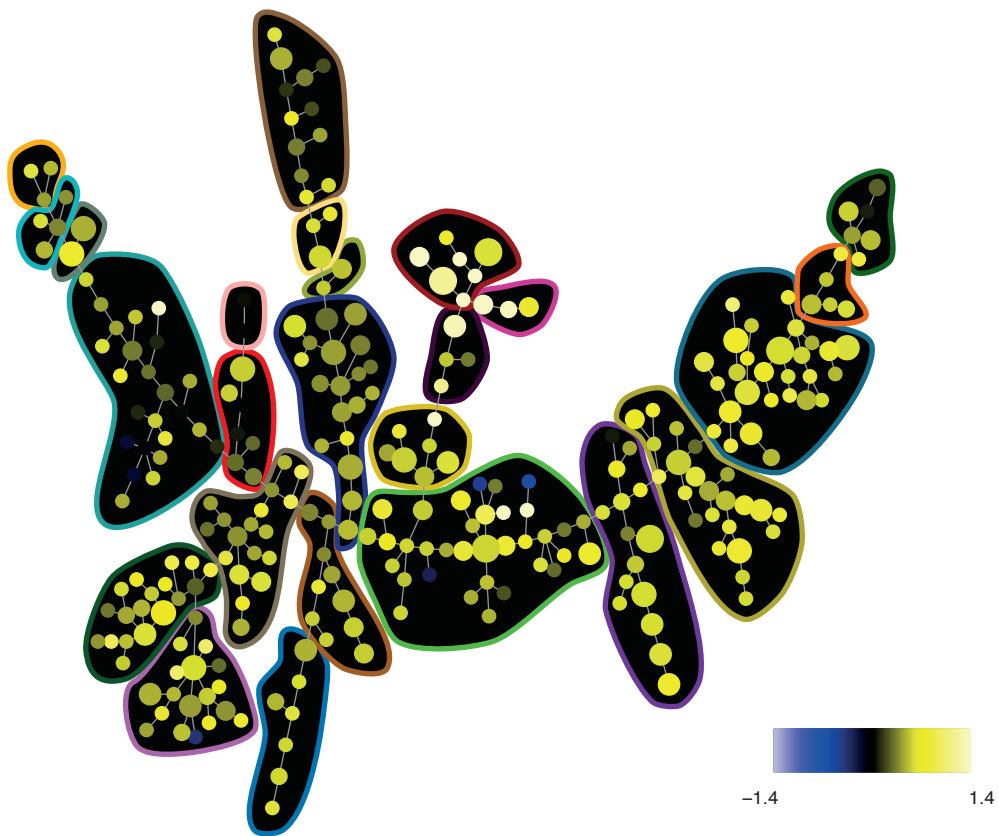

Figure S9D

171-pBtk/Itk ---- U0126+Unstim vs Ref Ratio

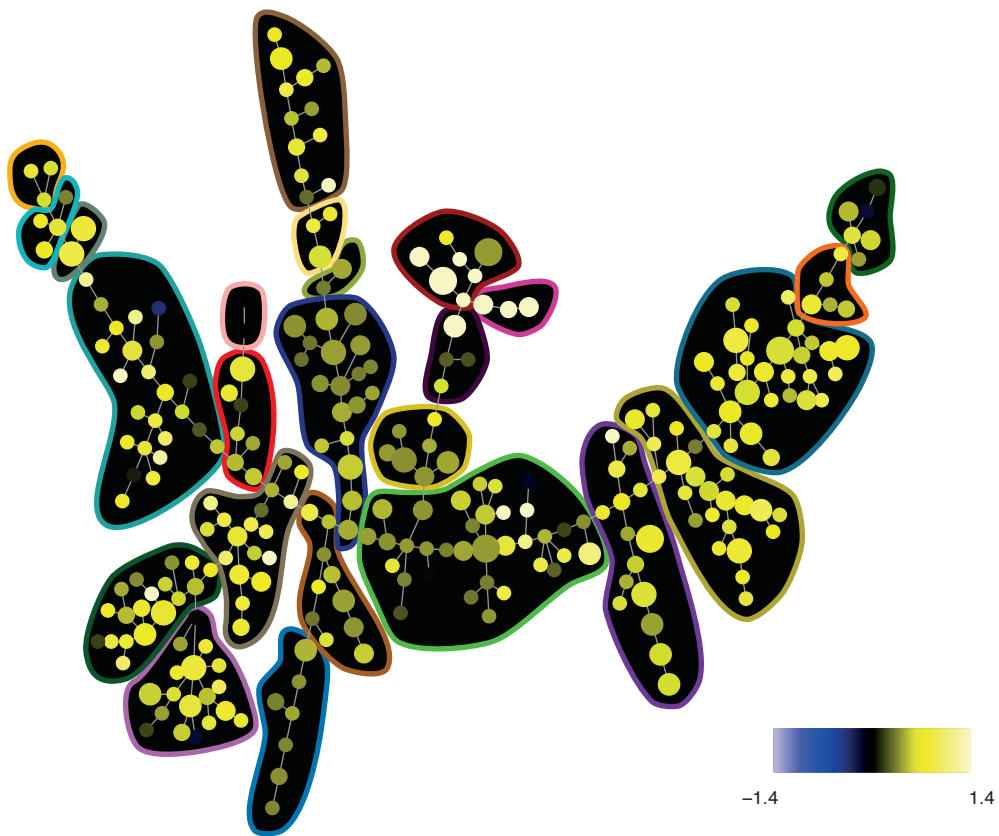

Figure S9D

172-pS6 ---- U0126+PMAiono vs Ref Ratio

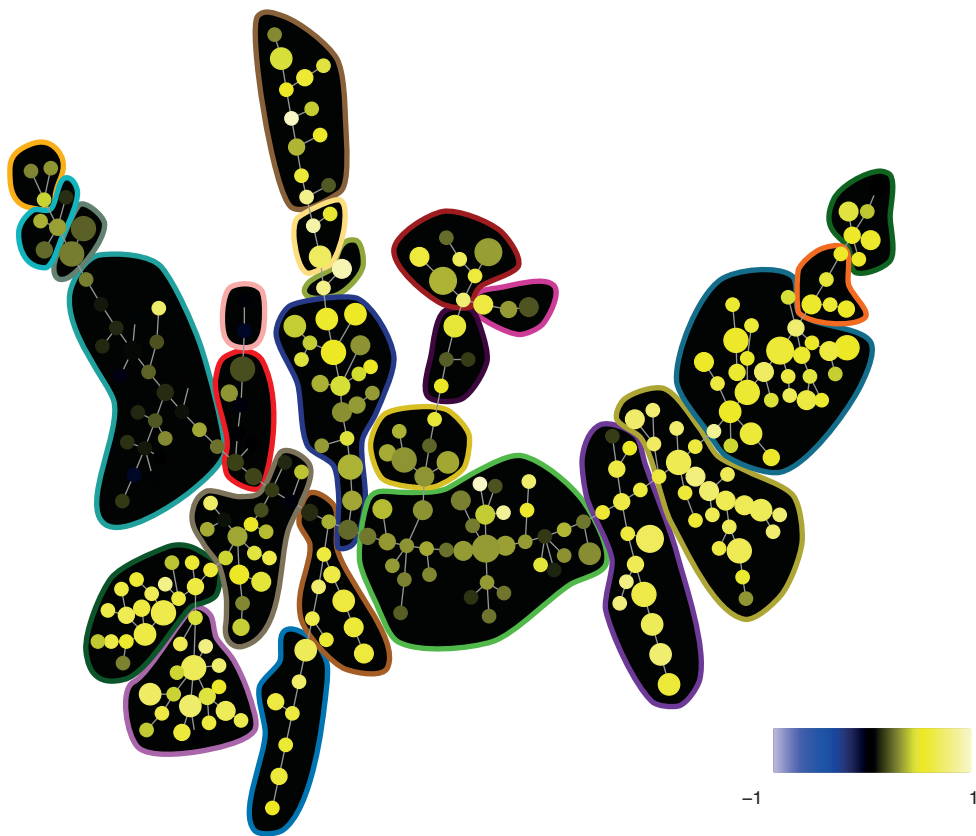

Figure S9D

172-pS6 --- U0126+Unstim vs Ref Ratio

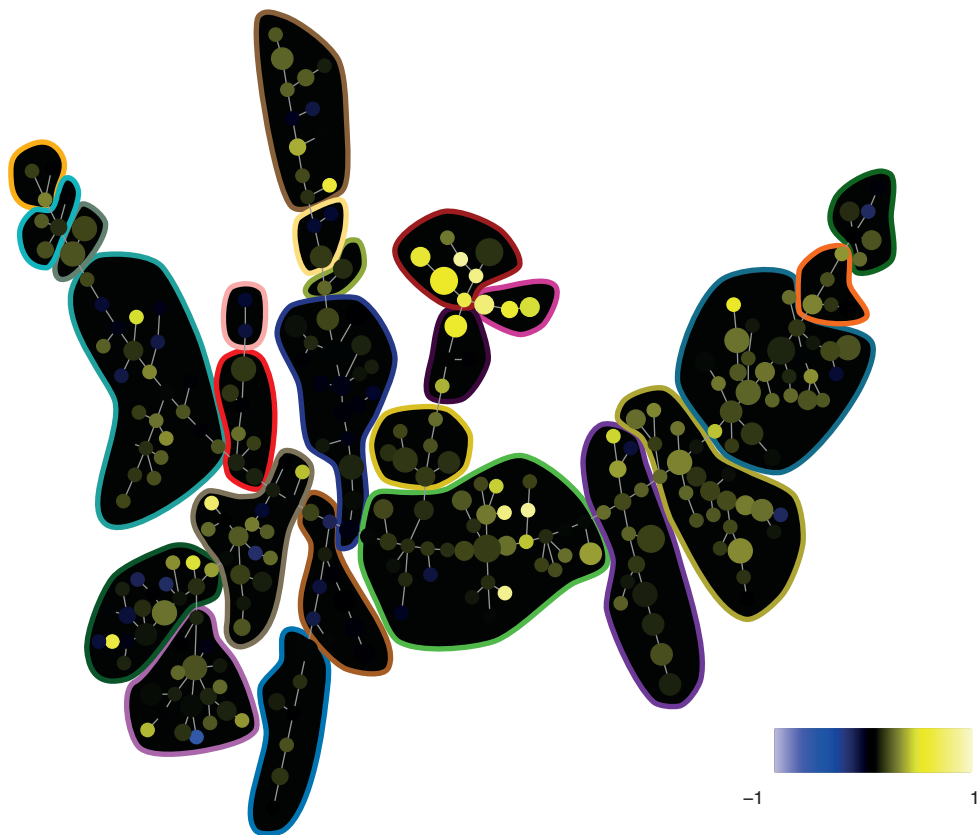

Figure S9D

174-pSrcFK ---- U0126+PMAiono vs Ref Ratio

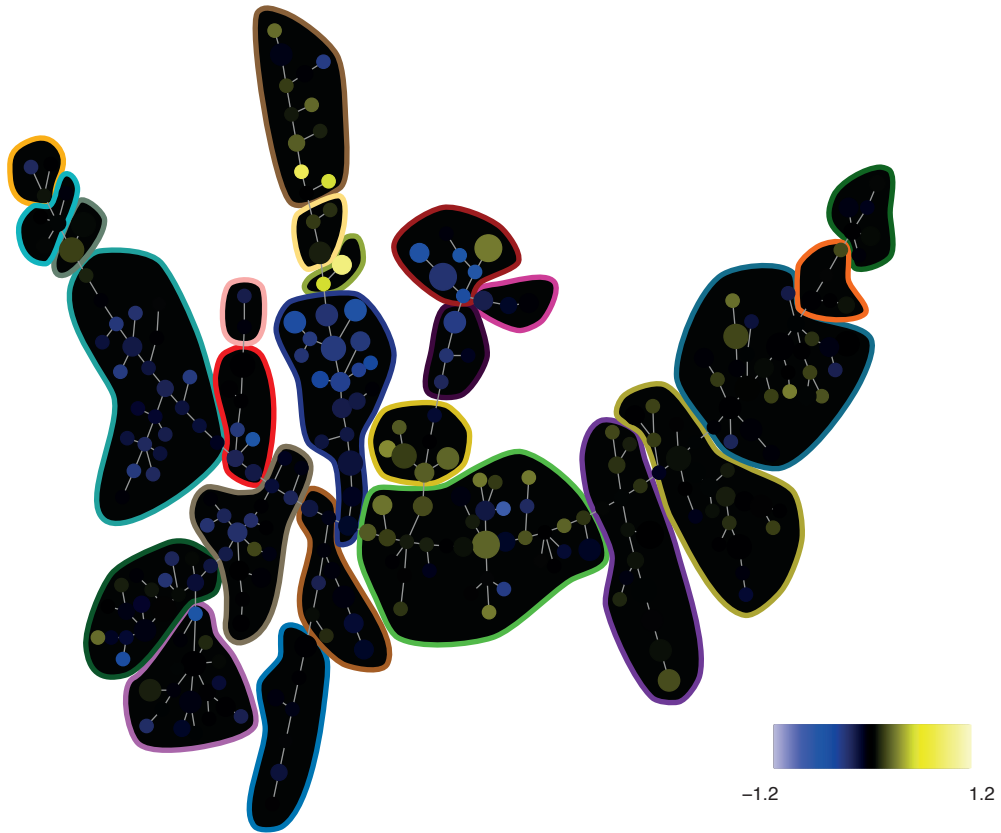

Figure S9D

174-pSrcFK ---- U0126+Unstim vs Ref Ratio

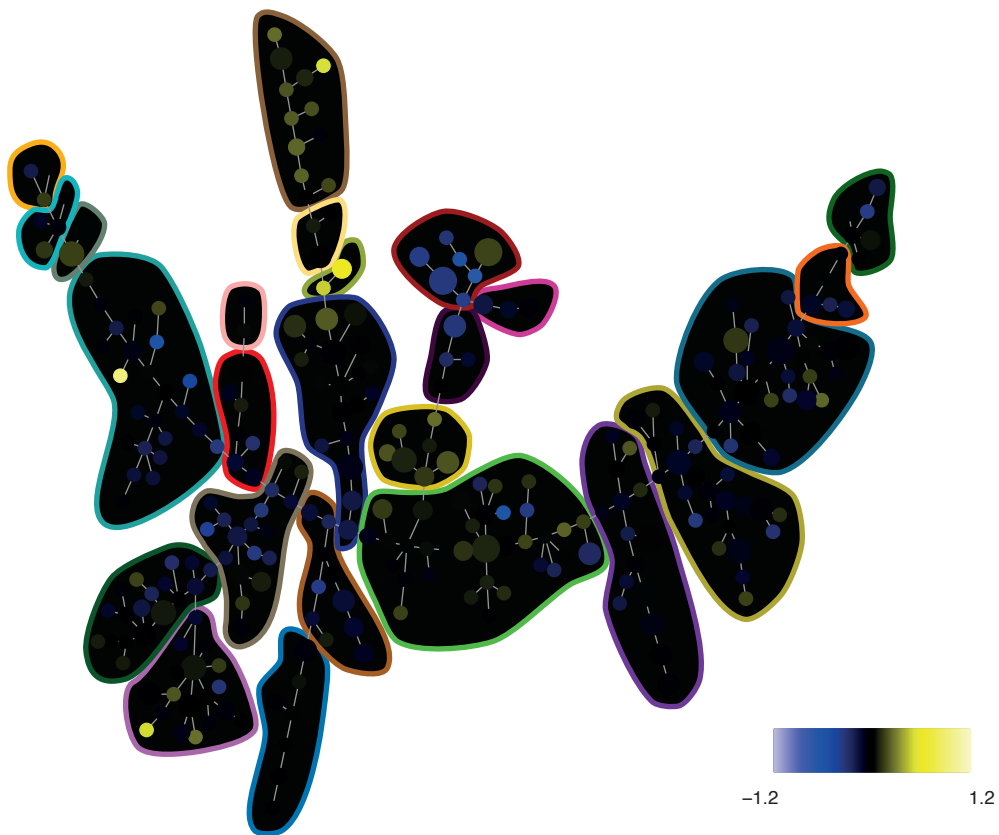



Figure S9D

175-pCrkL --- U0126+PMAiono vs Ref Ratio

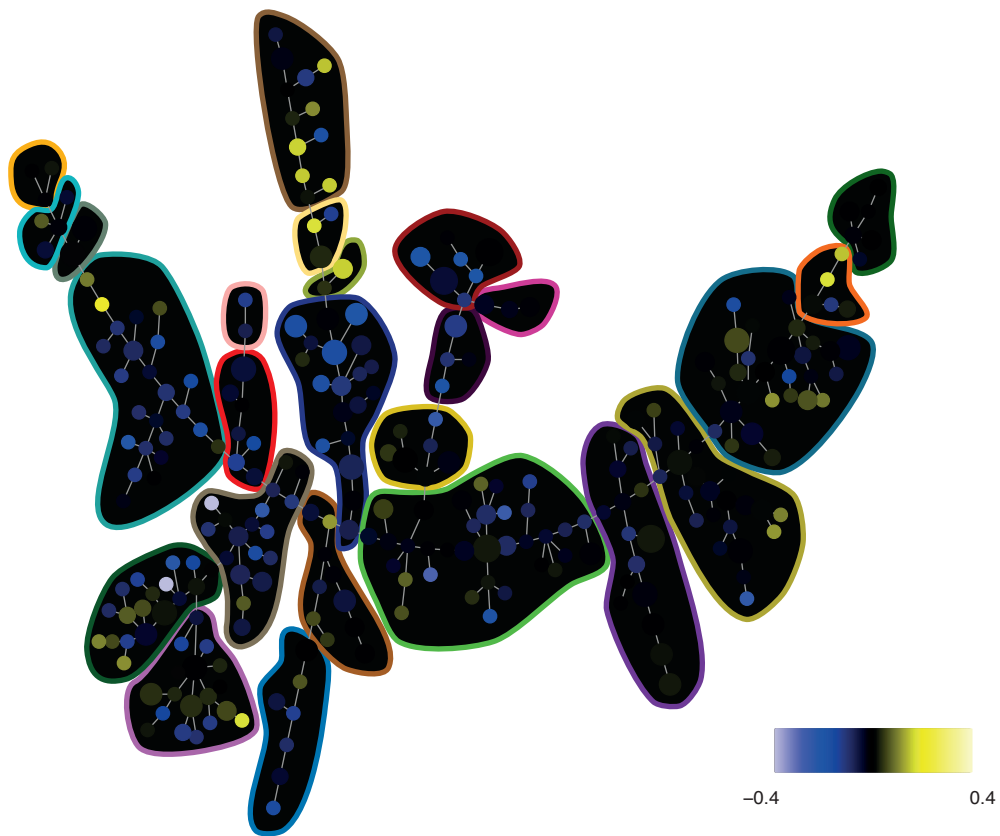

Figure S9D

175-pCrkL ---- U0126+Unstim vs Ref Ratio

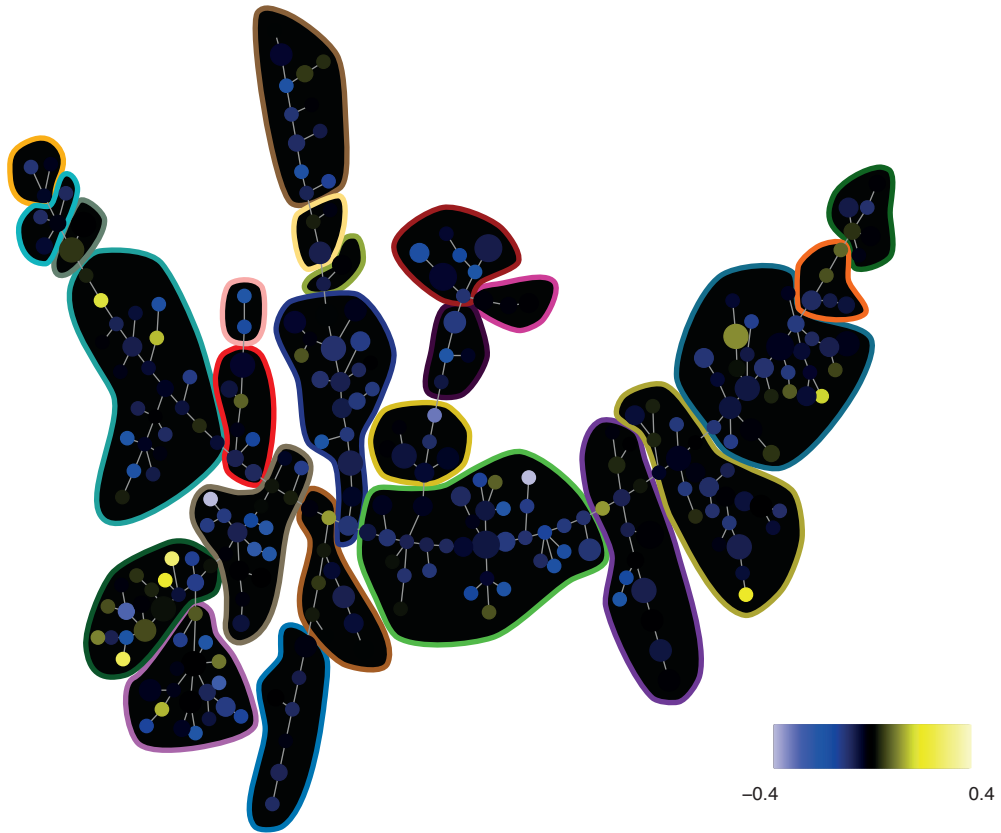

Figure S9D

176-pCREB ---- U0126+PMAiono vs Ref Ratio

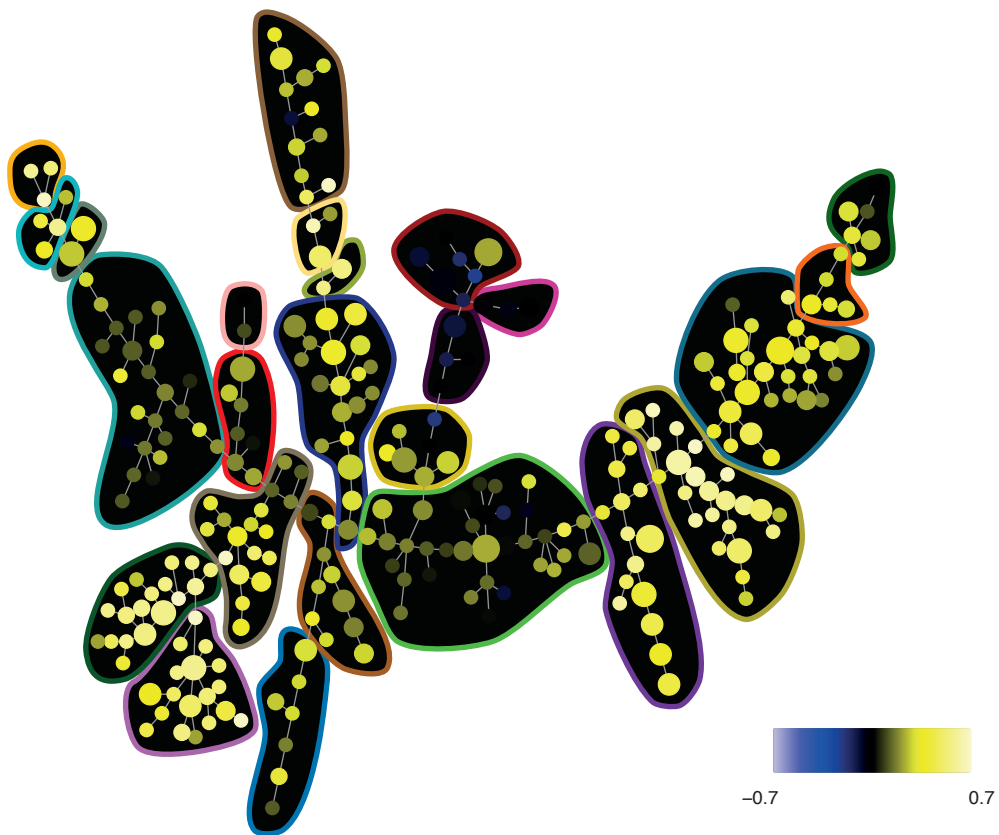

Figure S9D

176-pCREB ---- U0126+Unstim vs Ref Ratio

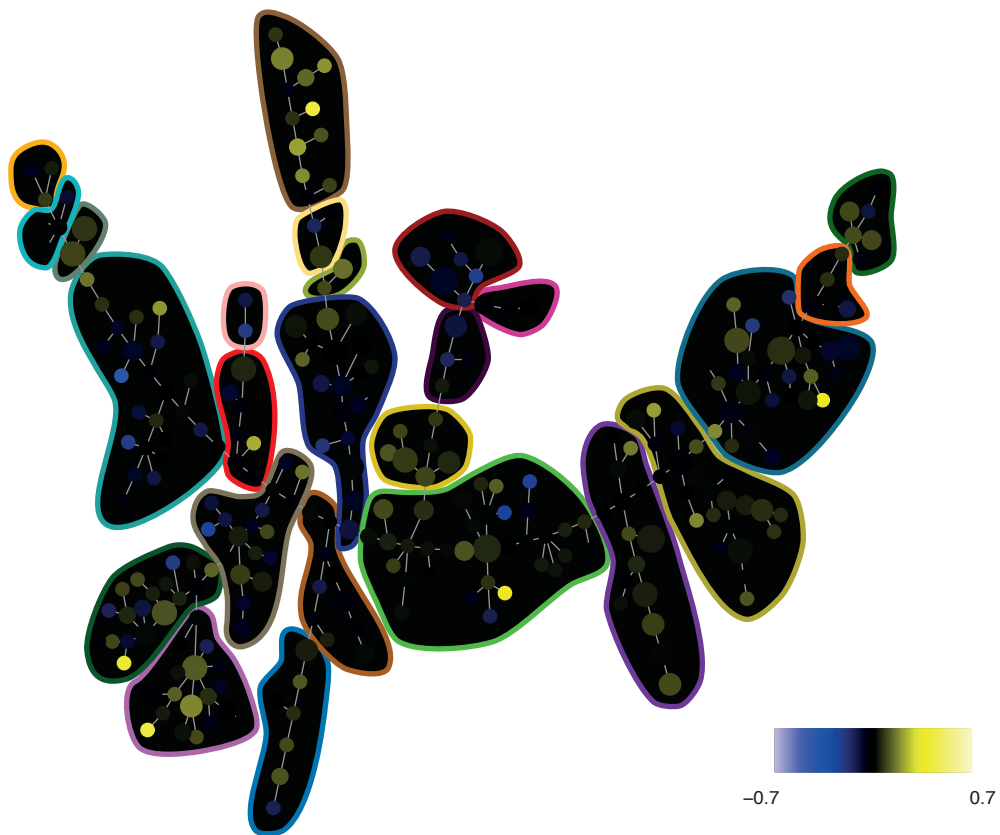

Figure S9E

110 114-CD3

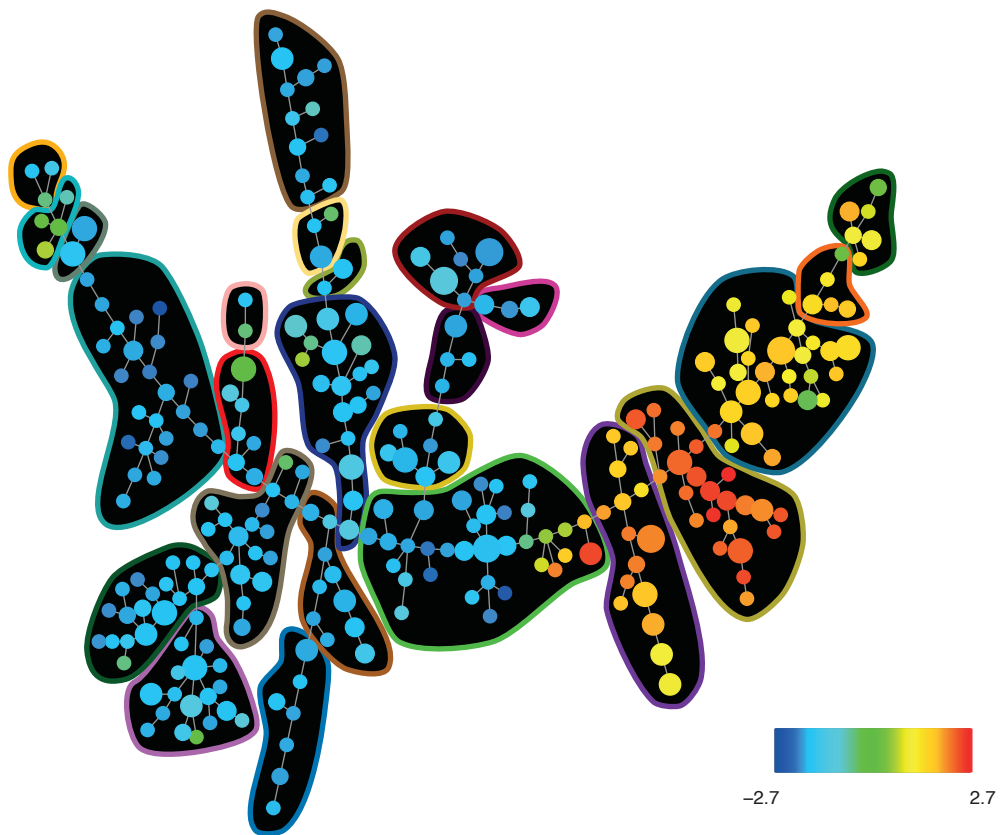

Figure S9E

115-CD45

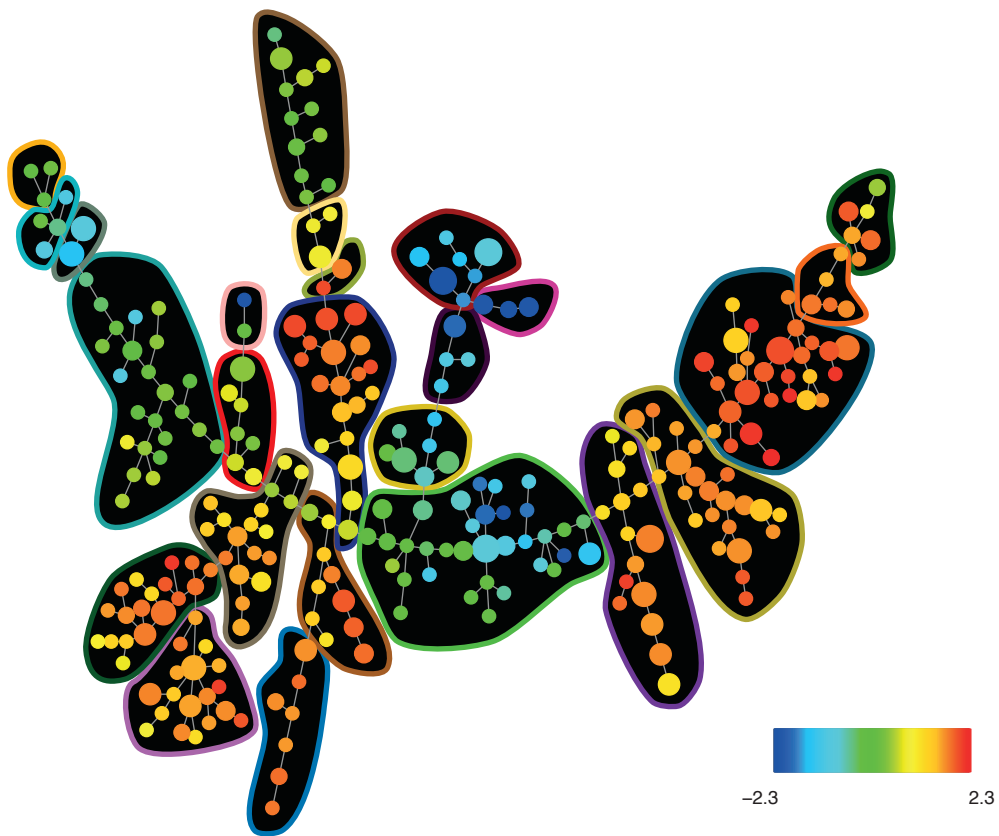

Figure S9E

139-CD45RA

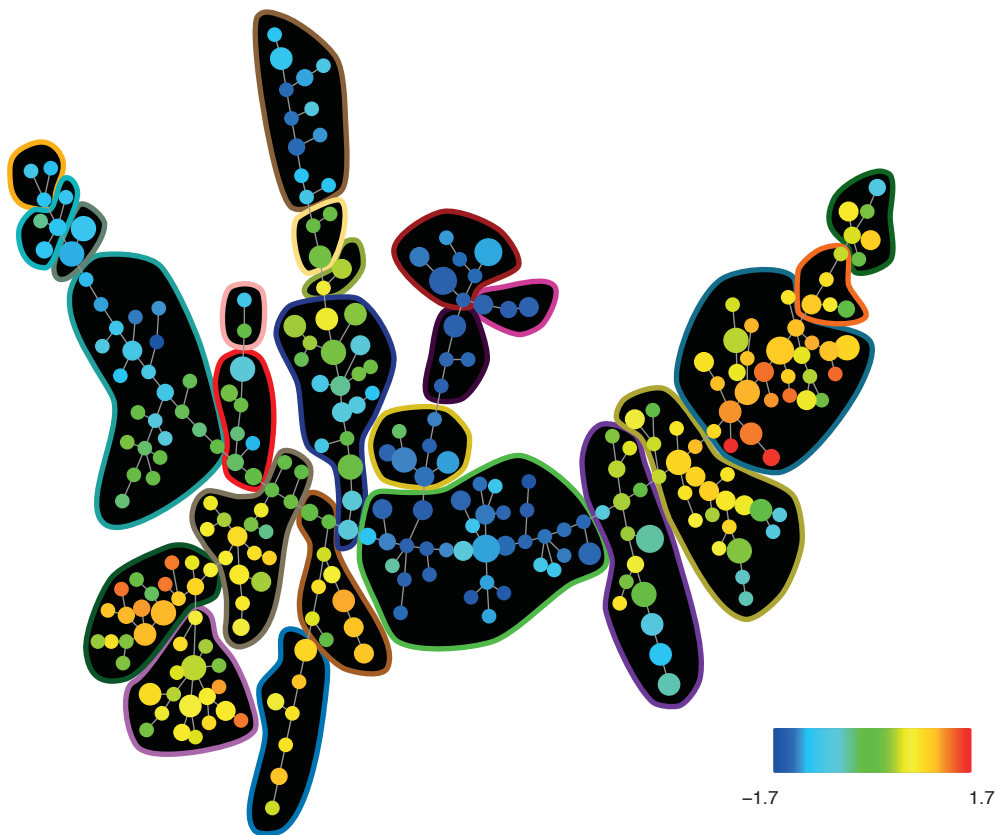

Figure S9E

142-CD19

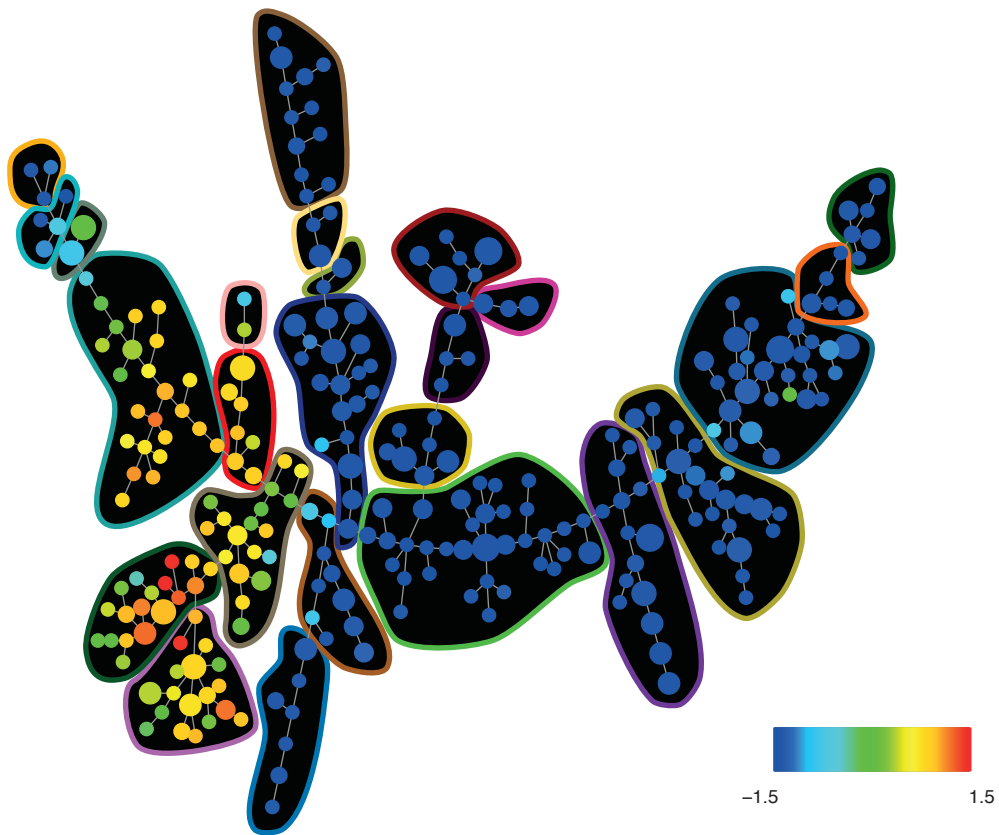



Figure S9E

144-CD11b

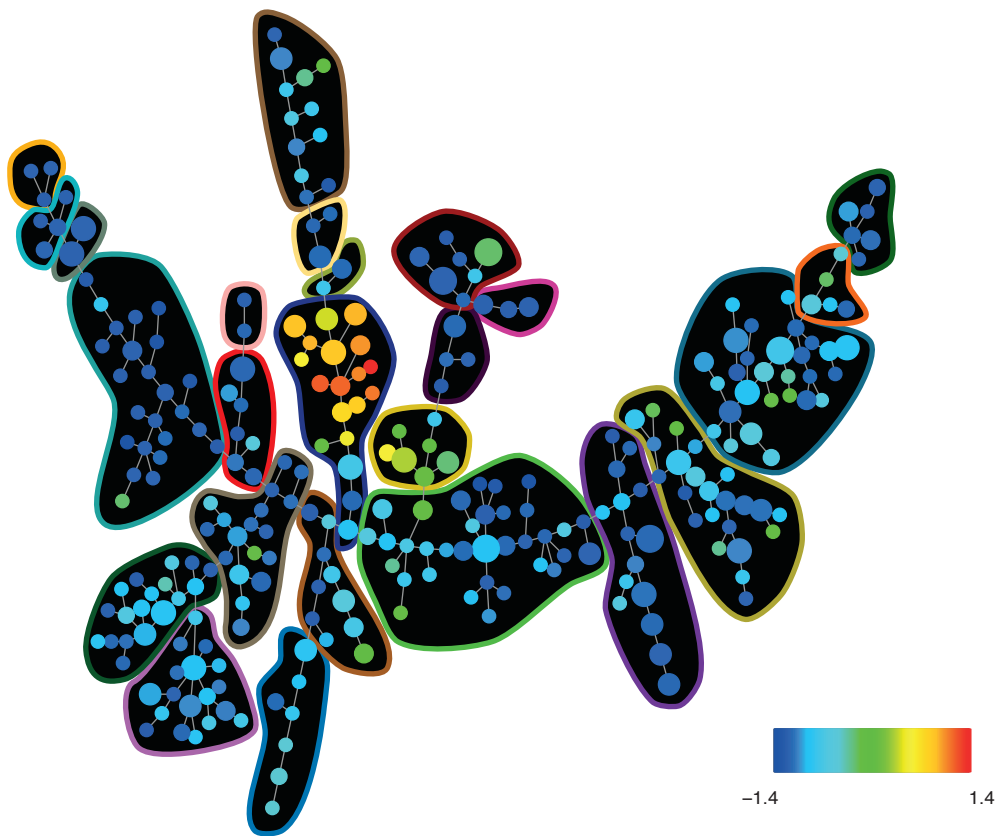

Figure S9E

145-CD4

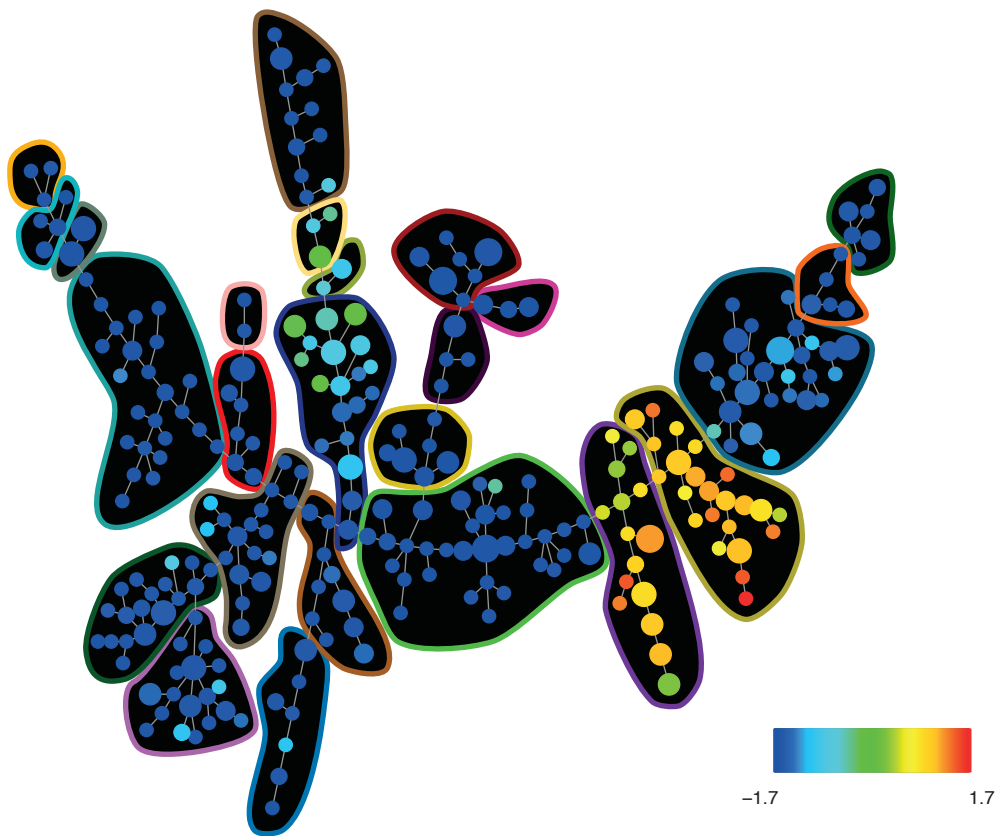

Figure S9E

146-CD8

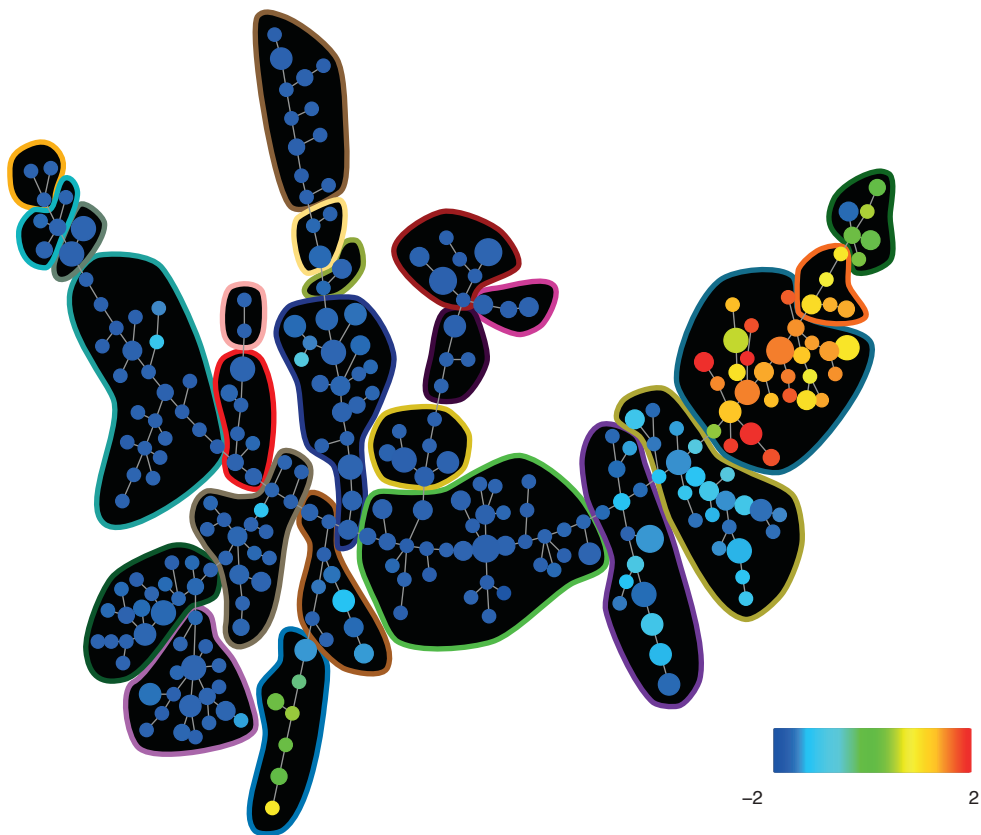

Figure S9E

147-CD20

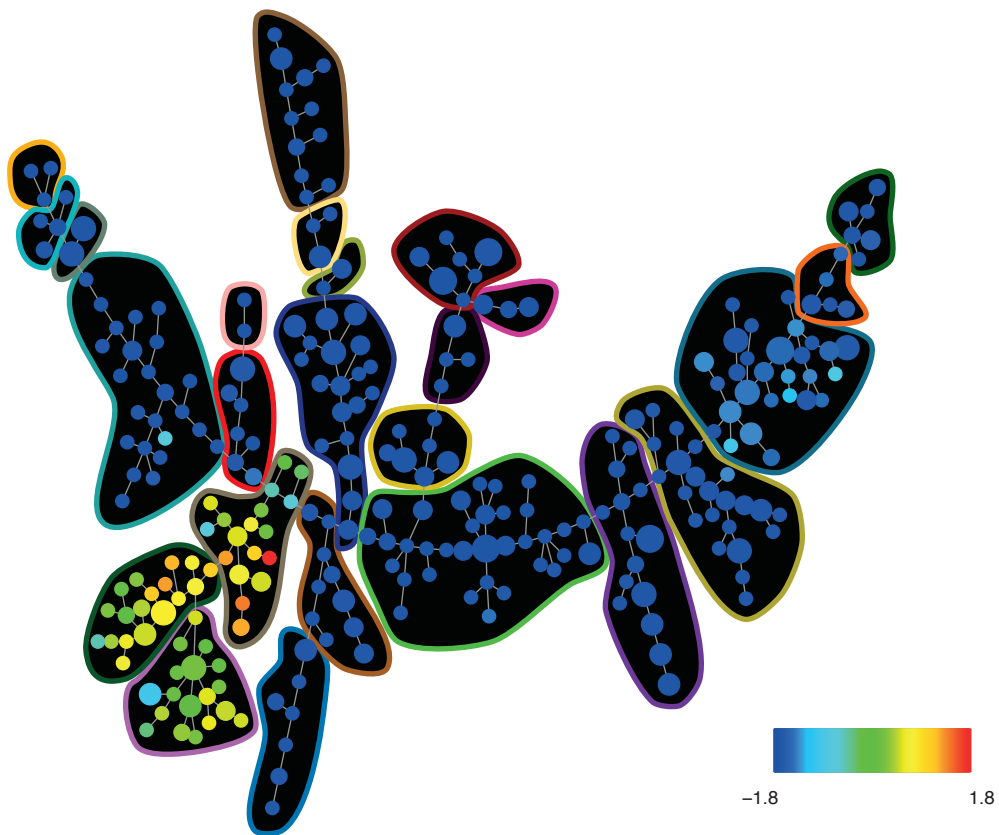

Figure S9E

148-CD34

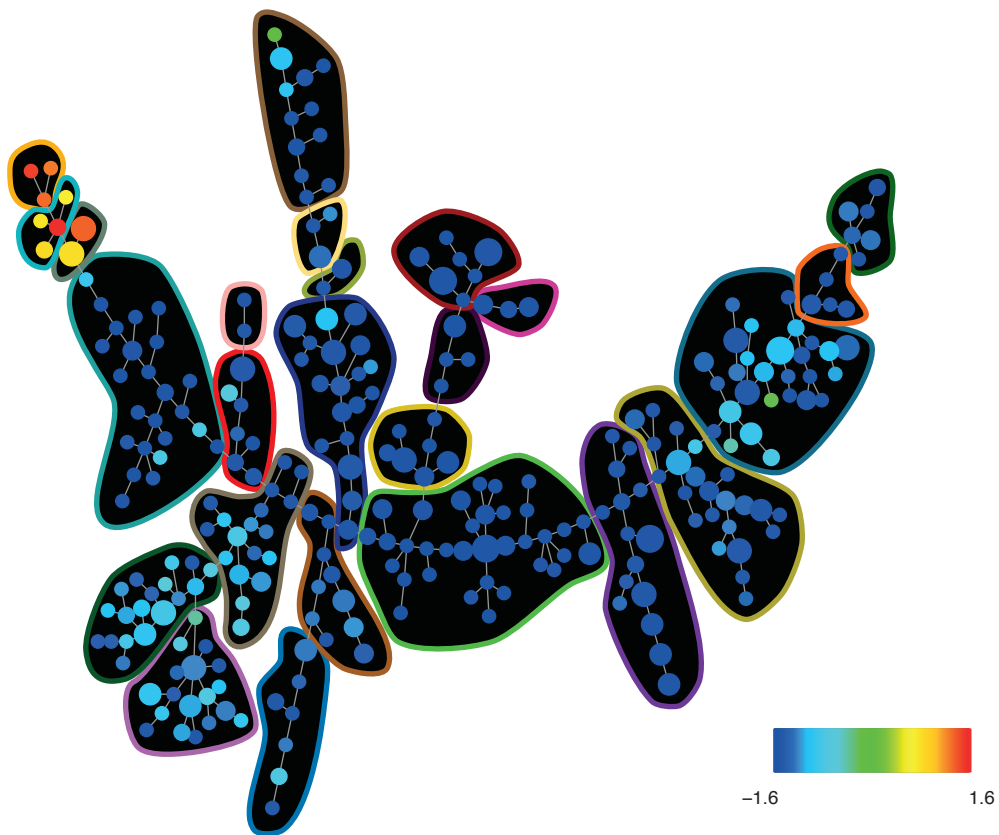

Figure S9E

158-CD33

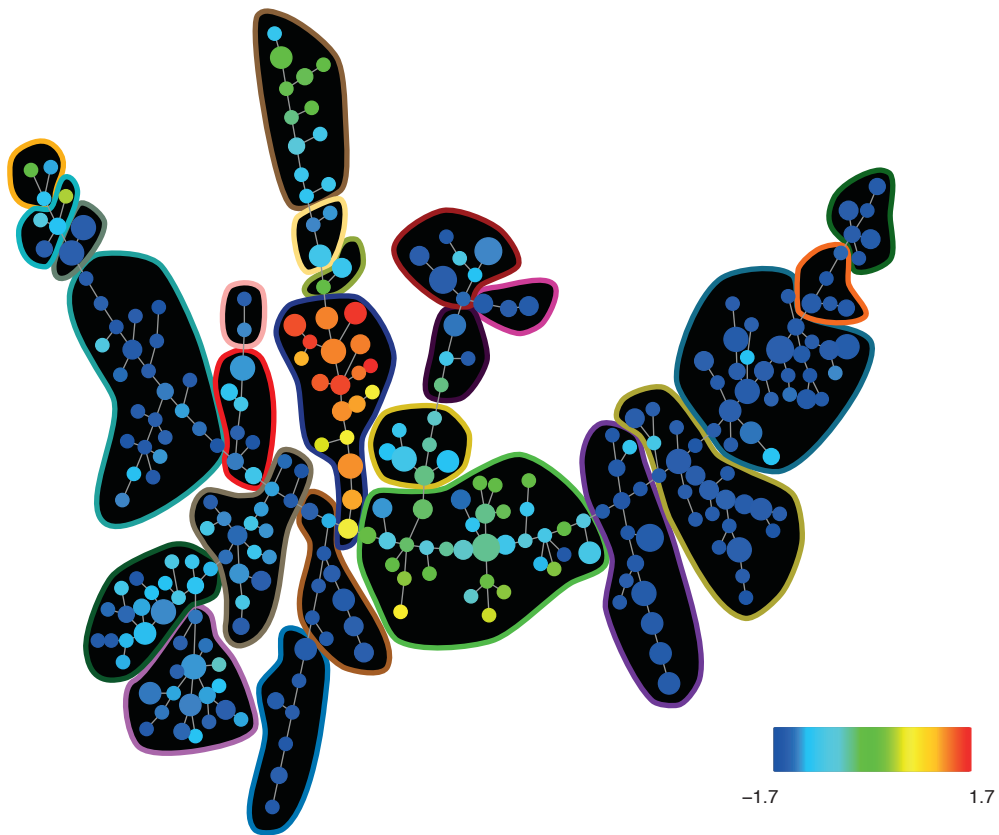

Figure S9E

160-CD123

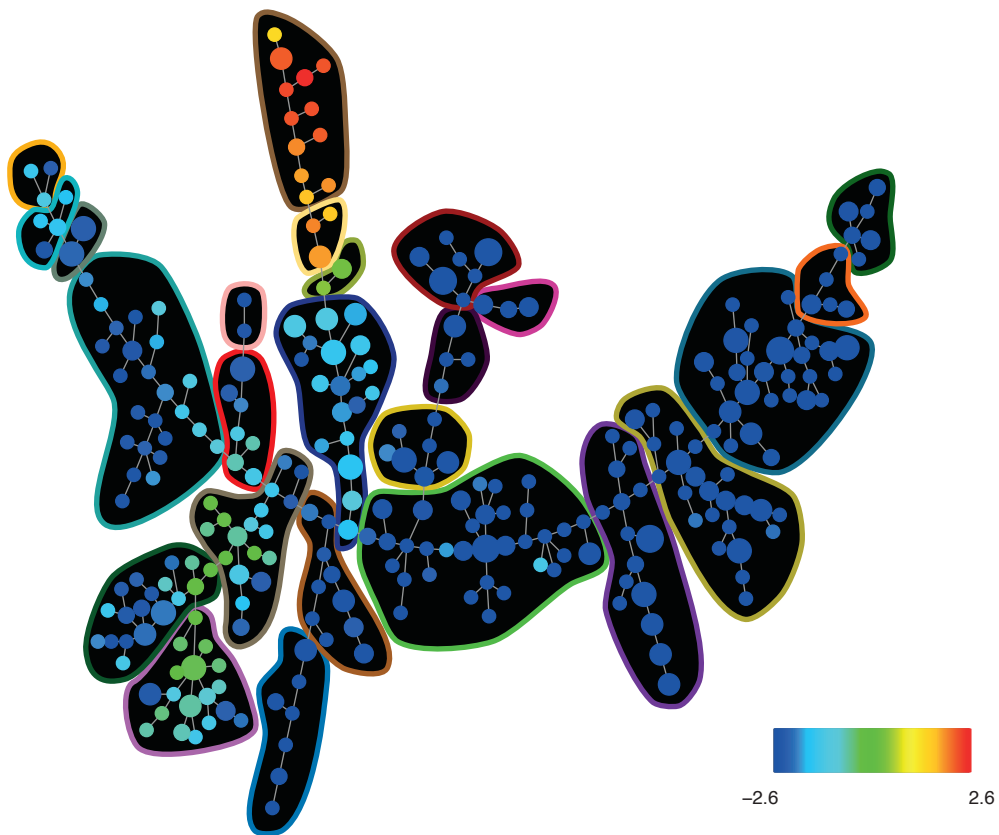

Figure S9E

167-CD38

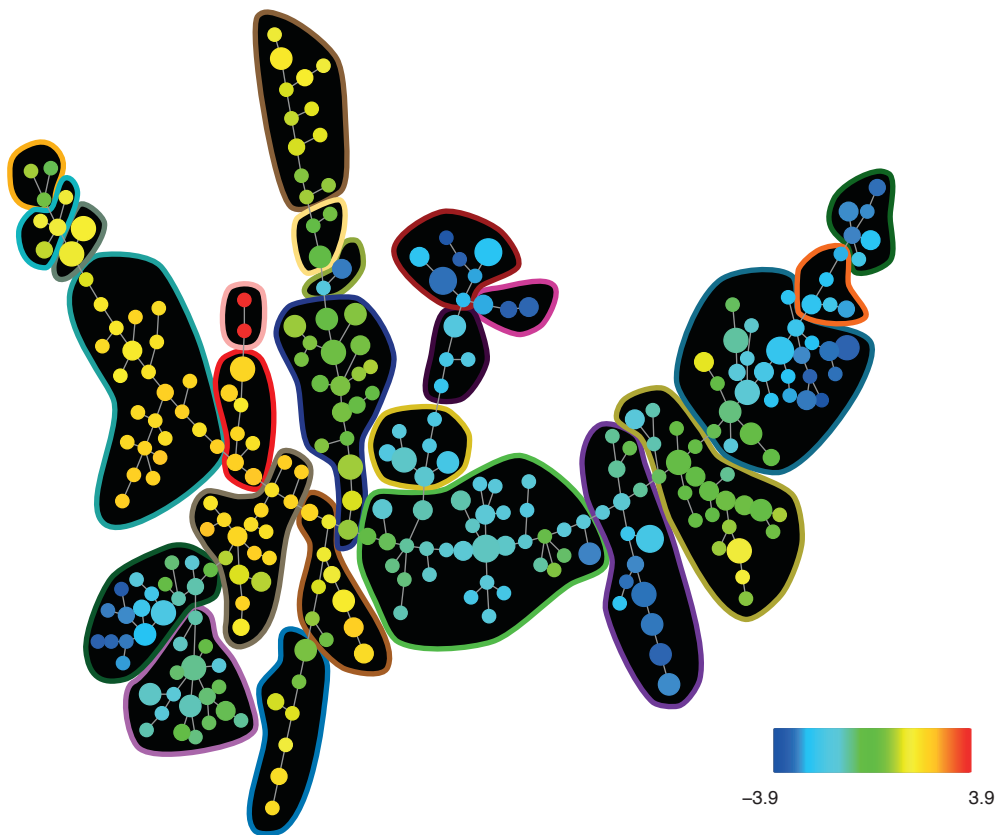



Figure S9E

170-CD90

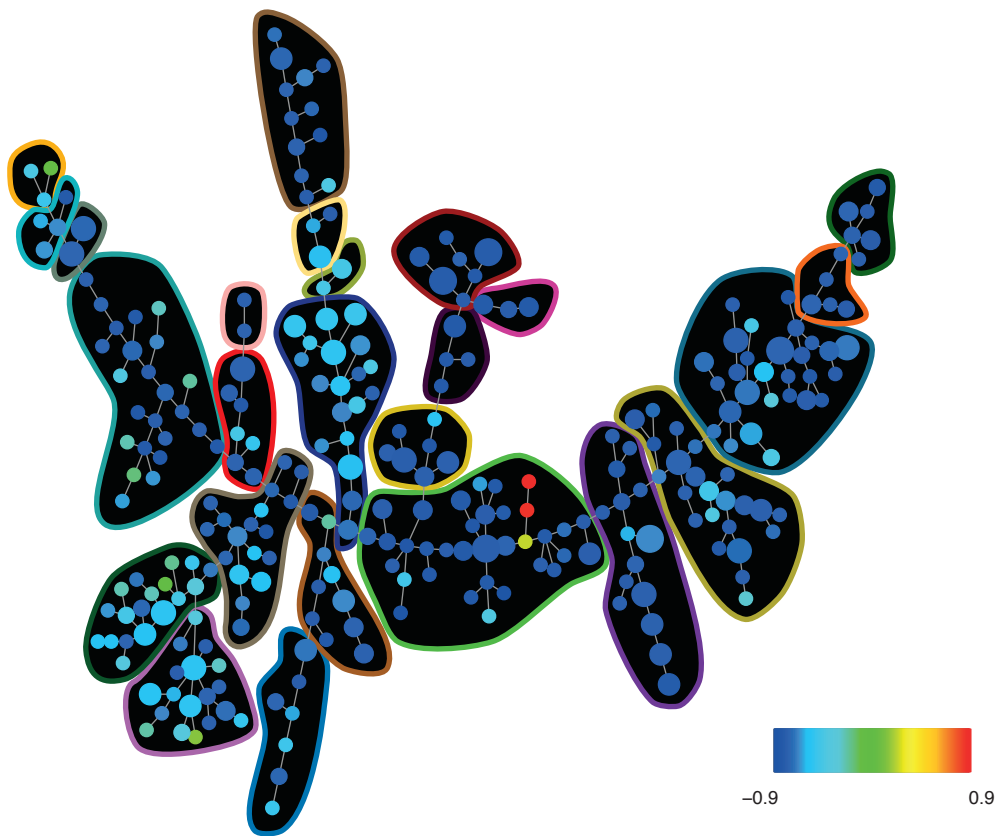

Figure S9E

191-DNA

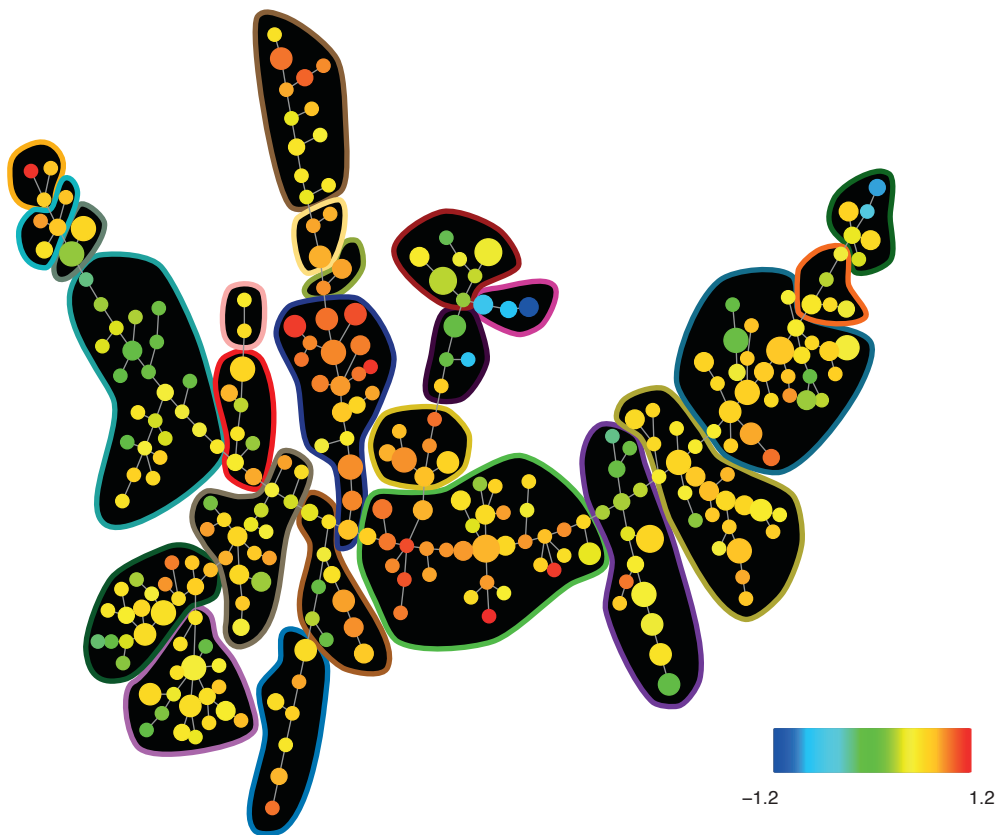

# Figure S10

## A

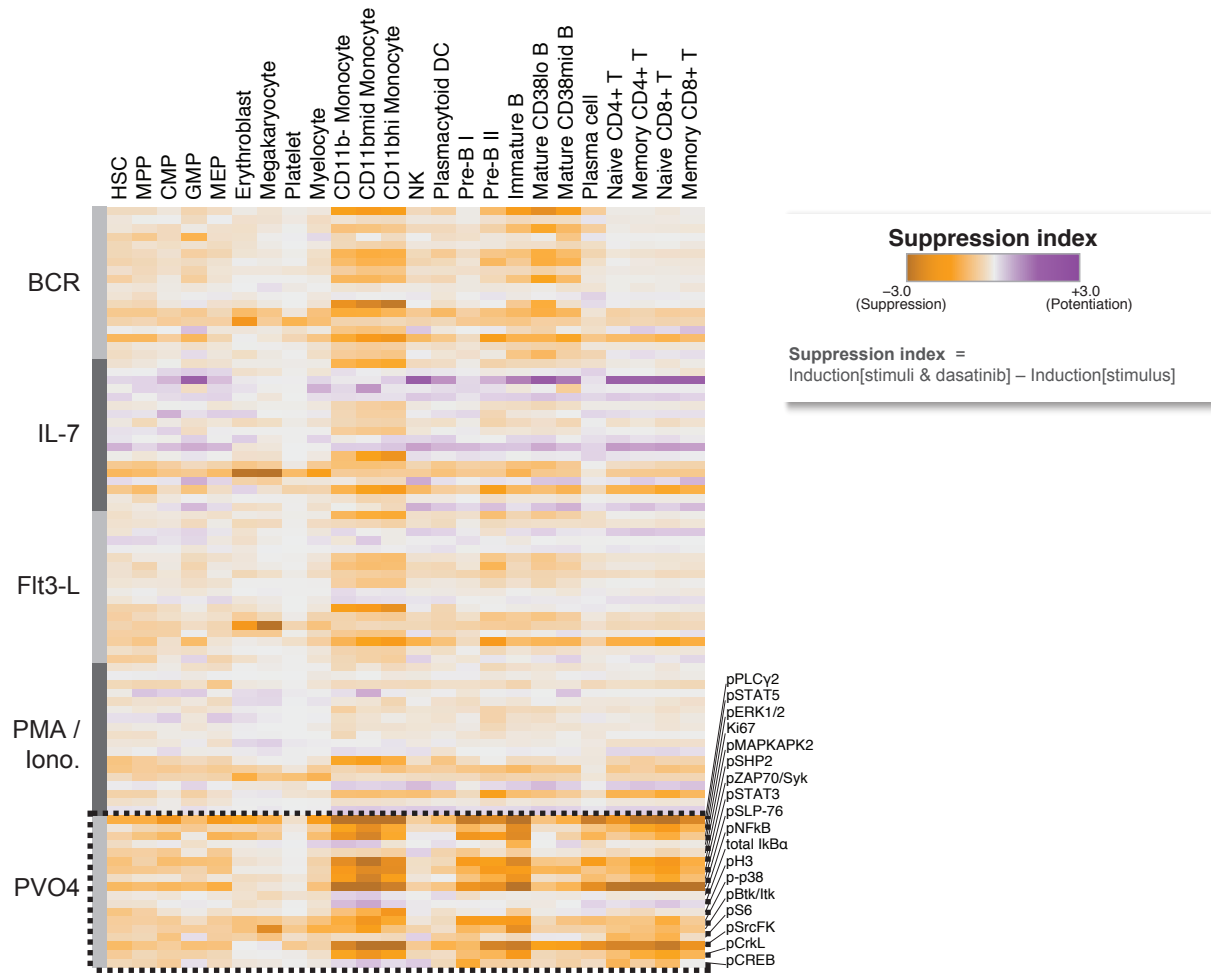

## B

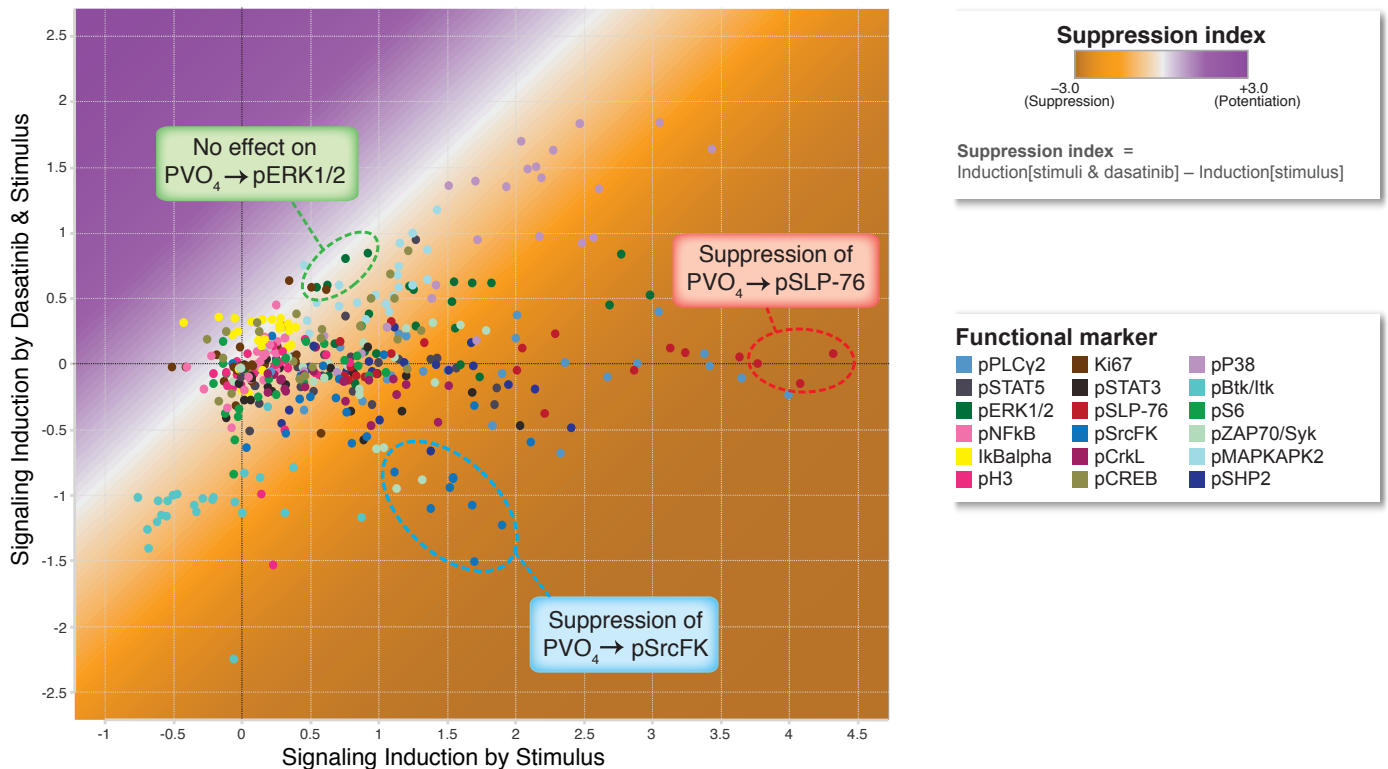

# Figure S11

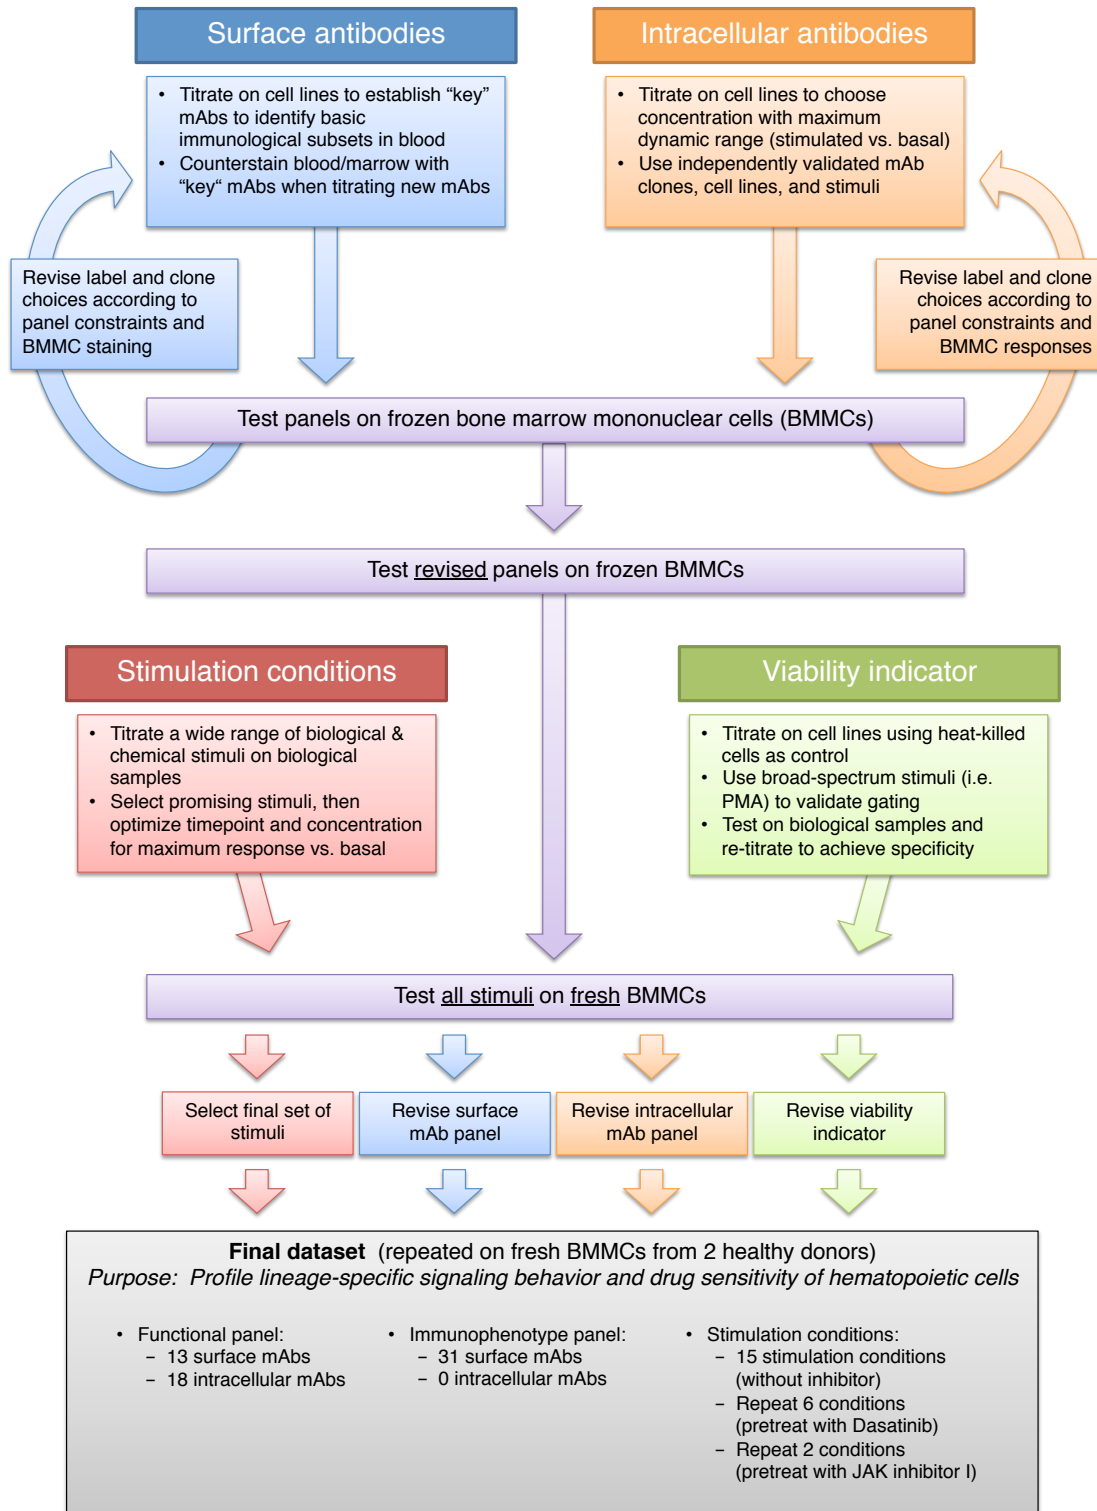

**Table S1:** Frequency of cell populations gated for comparison of fluorescence and mass cytometry signaling analysis of healthy PBMC samples (n=2)

|                        |                        | Gate #         | Frequency of Single Cell Gate |                |
|------------------------|------------------------|----------------|-------------------------------|----------------|
|                        |                        |                | Fluorescence                  | Mass Cytometry |
| PBMC A<br>(Fig. S2)    | CD33 Monocytes         | 1              | 13.5                          | 11.4           |
|                        | CD33- Lymphocytes      |                | 80.3                          | 79.9           |
|                        | CD20+ B Cells          | 2              | 18.8                          | 18.3           |
|                        | CD33-CD20- Lymphocytes |                | 80.5                          | 76.2           |
|                        | NKT Cells              | 7              | 0.8                           | 4.2            |
|                        | CD56mid NK Cells       | 8              | 1.7                           | 5.6            |
|                        | CD56hi NK cells        | 9              | 0.1                           | 0.6            |
|                        | CD3+ T Cells           |                | 81.0                          | 77.5           |
|                        | CD8+CD45RA+ Tcells     | 5              | 14.4                          | 17.3           |
|                        | CD8+CD45RA- T Cells    | 6              | 11.4                          | 15.4           |
|                        | CD4+CD45RA+ Tcells     | 3              | 22.4                          | 28.6           |
|                        | CD4+CD45RA- T Cells    | 4              | 28.4                          | 36.4           |
|                        | PBMC B<br>(Fig. 1)     | CD33 Monocytes | 1                             | 38.8           |
| CD33- Lymphocytes      |                        |                | 49.7                          | 57.1           |
| CD20+ B Cells          |                        | 2              | 18.5                          | 18.4           |
| CD33-CD20- Lymphocytes |                        |                | 80.4                          | 79.2           |
| NKT Cells              |                        | 7              | 0.6                           | 2.7            |
| CD56mid NK Cells       |                        | 8              | 14.0                          | 19.9           |
| CD56hi NK cells        |                        | 9              | 1.3                           | 2.0            |
| CD3+ T Cells           |                        |                | 61.1                          | 59.3           |
| CD8+CD45RA+ Tcells     |                        | 5              | 14.3                          | 12.5           |
| CD8+CD45RA- T Cells    |                        | 6              | 21.9                          | 26.1           |
| CD4+CD45RA+ Tcells     |                        | 3              | 18.4                          | 17.7           |
| CD4+CD45RA- T Cells    |                        | 4              | 37.4                          | 39.8           |

**Table S2:** Evidence for manual annotations of node groups on SPADE tree.

| Group name      | Reference | Evidence for                                                                                                                                                        | Evidence against                                        |
|-----------------|-----------|---------------------------------------------------------------------------------------------------------------------------------------------------------------------|---------------------------------------------------------|
| HSC             | 1         | <ul style="list-style-type: none"> <li>Lin- CD45lo CD34+ CD38+ CD45RA- CD90- Ki67+</li> </ul>                                                                       |                                                         |
| MPP             | 1         | <ul style="list-style-type: none"> <li>Lin- CD45lo CD34+ CD38+ CD45RA- CD90- Ki67+</li> </ul>                                                                       | Some CD19+ contamination                                |
| Pro-B           | 2         | <ul style="list-style-type: none"> <li>CD34+, CD38++</li> <li>Clusters near Pre-B I cells</li> </ul>                                                                |                                                         |
| Pre-B I         | 2         | <ul style="list-style-type: none"> <li>CD45lo CD34+ CD38+ CD19+ CD20-</li> </ul>                                                                                    | Upsampled tree shows CD10-                              |
| Pre-B II        | 2         | <ul style="list-style-type: none"> <li>CD45mid CD34het CD38+ CD19+ CD123- CD10+</li> </ul>                                                                          | Some CD34+ contamination                                |
| Immature B      | 2         | <ul style="list-style-type: none"> <li>CD45hi CD34- CD38+ CD19+ CD20+ CD123mid CD10+ IgM+</li> </ul>                                                                |                                                         |
| Mature B        | 2         | <ul style="list-style-type: none"> <li>CD45hi CD34- CD38- CD19+ CD20+ CD123- CD10- IgMhet</li> </ul>                                                                |                                                         |
| IL3Ra+ mature B | 2         | <ul style="list-style-type: none"> <li>CD45hi CD34- CD38- CD19+ CD20+ CD123+ CD10- IgMhet</li> </ul>                                                                |                                                         |
| Plasma cell     | 3         | <ul style="list-style-type: none"> <li>CD45lo CD19+ CD20- CD38+++</li> </ul>                                                                                        |                                                         |
| NK              | 4         | <ul style="list-style-type: none"> <li>Directly observed as CD45hi CD45RA+ CD38+ CD3- CD19-</li> <li>Upsampled tree shows CD56+ CD7+ CD161+ CD16+.</li> </ul>       |                                                         |
| NKT             | 4         | <ul style="list-style-type: none"> <li>CD3+ CD4- CD8-</li> <li>Upsampled tree shows CD161+.</li> </ul>                                                              |                                                         |
| Memory CD4 T    | 9         | <ul style="list-style-type: none"> <li>CD45hi CD3+ CD19- CD33- CD4+ CD8- CD45RA-</li> </ul>                                                                         |                                                         |
| Naive CD4 T     | 9         | <ul style="list-style-type: none"> <li>CD45hi CD3+ CD19- CD33- CD4+ CD8- CD45RA+</li> </ul>                                                                         |                                                         |
| Memory CD8 T    | 9         | <ul style="list-style-type: none"> <li>CD45hi CD3+ CD19- CD33- CD8+ CD4- CD45RA-</li> </ul>                                                                         |                                                         |
| Naive CD8 T     | 9         | <ul style="list-style-type: none"> <li>CD45hi CD3+ CD19- CD33- CD8+ CD4- CD45RA+</li> </ul>                                                                         |                                                         |
| CMP             | 1         | <ul style="list-style-type: none"> <li>Lin- CD34+ CD38+ CD45RA- CD123-</li> </ul>                                                                                   |                                                         |
| Monoblast       | 5         | <ul style="list-style-type: none"> <li>CD45mid CD4lo CD11b- CD34- CD38+ CD33+ CD123lo CD14mid CD15mid CD16- CD13lo/mid CD117lo/- HLADR++</li> </ul>                 | Lacks CD34                                              |
| Monocyte        | 2         | <ul style="list-style-type: none"> <li>CD33+ CD14+ CD11b+ HLADR+</li> </ul>                                                                                         |                                                         |
| Pro-monocyte    | 5         | <ul style="list-style-type: none"> <li>CD45mid/+ CD4mid CD11b- CD34- CD38mid CD33+ CD123lo CD14lo CD15lo/- CD16lo/- CD3mid CD117het HLADR++</li> </ul>              |                                                         |
| Pre-DC          | 6         | <ul style="list-style-type: none"> <li>CD45mid/+ CD45RA+ CD4+ CD11b- CD34- CD38mid CD33lo CD123lo CD14- CD15mid CD16- CD13- CD117mid HLADR-</li> </ul>              |                                                         |
| GMP             | 1         | <ul style="list-style-type: none"> <li>CD45mid CD11b- CD34+ CD38+ CD45RA+ CD33mid CD123+ CD14- CD15- CD16- CD13+ CD117++ HLADR- Flt3L and TPO responsive</li> </ul> |                                                         |
| Plasmacytoid DC | 7         | <ul style="list-style-type: none"> <li>CD38mid CD33mid CD11blo CD123++</li> </ul>                                                                                   | Upsampled tree shows HLADR-                             |
| Myelocyte       | 2         | <ul style="list-style-type: none"> <li>CD15++ CD13- CD14lo CD16lo CD123lo CD33mid CD11bmid HLADR-</li> </ul>                                                        |                                                         |
| Promyelocyte    | 2         | <ul style="list-style-type: none"> <li>CD38mid, CD45mid, CD11b-, CD33mid</li> <li>Upsampled tree shows CD117mid, CD15mid, CD16-, CD13lo.</li> </ul>                 | Pro-myelocytes should be CD13+ according to Reference 2 |

|                         |      |                                                                                                                                                                                                                                                                                                                |                                         |
|-------------------------|------|----------------------------------------------------------------------------------------------------------------------------------------------------------------------------------------------------------------------------------------------------------------------------------------------------------------|-----------------------------------------|
| CD38mid CD3-platelet    | 8    | <ul style="list-style-type: none"> <li>• CD38mid CD3- DNAl<sub>o</sub> CD45lo</li> <li>• Upsampled tree shows some nodes are CD61+</li> <li>• Nearly all nodes are basally pBtk high and all respond to TPO on Ki67, pBtk, and pS6</li> </ul>                                                                  |                                         |
| CD38- CD3-platelet      | 8    | <ul style="list-style-type: none"> <li>• CD38- CD3- DNAl<sub>o</sub> CD45lo</li> <li>• A few nodes are basally pBtk high, but all respond to TPO on Ki67, pSrc, and pS6</li> </ul>                                                                                                                             | Upsampled tree shows no nodes are CD61+ |
| CD38mid CD3mid platelet | 8    | <ul style="list-style-type: none"> <li>• CD38mid CD3mid DNAl<sub>o</sub> CD45lo</li> <li>• Upsampled tree shows some nodes are CD61+</li> <li>• All nodes respond to TPO by upregulating Ki67 and downregulating pBtk</li> </ul>                                                                               | Upsampled tree shows no nodes are CD61+ |
| Erythroblast            | 2, 5 | <ul style="list-style-type: none"> <li>• DNAmid CD45lo CD38mid</li> <li>• Upsampled tree shows CD235het, CD117mid</li> <li>• Pro-erythroblasts should be CD117+ CD235- according to Reference 2</li> <li>• These nodes generally respond to SCF on pSyk/Zap70 more than any other CD45lo cell type.</li> </ul> |                                         |
| Erythrocyte             | 2    | <ul style="list-style-type: none"> <li>• DNAl<sub>o</sub> CD45- CD38-</li> <li>• Upsampled tree shows CD235++, CD117lo</li> <li>• Erythrocytes should be CD117- CD235+ according to Reference 2</li> <li>• These nodes don't respond much to SCF</li> </ul>                                                    |                                         |

### References for Supplemental Table 2:

1. Majeti et al. Identification of a hierarchy of multipotent hematopoietic progenitors in human cord blood. *Cell Stem Cell* (2007) vol. 1 (6) pp. 635-45
2. Dongen. Immunophenotypic differentiation patterns of normal hematopoiesis in human bone marrow: Reference patterns for age-related changes and disease-induced shifts. *Cytometry Part B: Clinical Cytometry* (2004) vol. 60B (1) pp. 1-13
3. Rawstron. Immunophenotyping of plasma cells. *Curr Protoc Cytom* (2006) Chapter 6. Unit 6.23.
4. Godfrey et al. Raising the NKT cell family. *Nature Immunology* (2010) vol. 11 (3) pp. 197
5. Swerdlow et al. WHO Classification of Tumours of Haematopoietic and Lymphoid Tissue. (2008) 4th Ed. Geneva: WHO Press.
6. Blom et al. Generation of interferon alpha-producing predendritic cell (Pre-DC)2 from human CD34(+) hematopoietic stem cells. *J Exp Med* (2000) vol. 192 (12) pp. 1785-96
7. Macdonald et al. Characterization of human blood dendritic cell subsets. *Blood* (2002) vol. 100 (13) pp. 4512
8. Crosby and Poole. Interaction of Bruton's tyrosine kinase and protein kinase Ctheta in platelets. Cross-talk between tyrosine and serine/threonine kinases. *J Biol Chem* (2002) vol. 277 (12) pp. 9958-65
9. Seder and Ahmed. Similarities and differences in CD4+ and CD8+ effector and memory T cell generation. *Nat Immunol* (2003) vol. 4 (9) pp. 835-42

**Table S3:** Significant perturbation-induced signaling responses in healthy bone marrow (one-sample *t*-test, *P* < 0.05 after Bonferroni correction)

| Inhibitor | Stimulus | Antibody       | Population         | Marrow 1 unadjusted t-test P value | Marrow 1 Bonferroni-corrected t-test P value | Marrow 2 unadjusted t-test P value | Marrow 2 Bonferroni-corrected t-test P value | Direction of Shift | Dataset(s) with significant shift (Bonferroni <i>P</i> < 0.05) |
|-----------|----------|----------------|--------------------|------------------------------------|----------------------------------------------|------------------------------------|----------------------------------------------|--------------------|----------------------------------------------------------------|
| --        | BCR      | 168-pH3        | CD11b- Monocytes   | 1.692E-06                          | 7.310E-04                                    | n.s.                               | n.s.                                         | Up                 | Marrow 1 Only                                                  |
| --        | BCR      | 169-pP38       | CD11bmid Monocytes | 5.699E-06                          | 2.462E-03                                    | n.s.                               | n.s.                                         | Up                 | Marrow 1 Only                                                  |
| --        | BCR      | 151-pERK1/2    | Plasma cell        | 6.336E-06                          | 2.737E-03                                    | n.s.                               | n.s.                                         | Up                 | Marrow 1 Only                                                  |
| --        | BCR      | 168-pH3        | CD11bmid Monocytes | 1.075E-05                          | 4.645E-03                                    | n.s.                               | n.s.                                         | Up                 | Marrow 1 Only                                                  |
| --        | BCR      | 141-pPLCgamma2 | Immature B         | 1.132E-05                          | 4.892E-03                                    | n.s.                               | n.s.                                         | Up                 | Marrow 1 Only                                                  |
| --        | BCR      | 176-pCREB      | Mature CD38lo B    | 1.344E-05                          | 5.805E-03                                    | 9.884E-06                          | 4.270E-03                                    | Up                 | Both                                                           |
| --        | BCR      | 168-pH3        | CD11bhi Monocytes  | 1.849E-05                          | 7.986E-03                                    | n.s.                               | n.s.                                         | Up                 | Marrow 1 Only                                                  |
| --        | BCR      | 168-pH3        | Mature CD38lo B    | 2.900E-05                          | 1.253E-02                                    | 4.368E-05                          | 1.887E-02                                    | Up                 | Both                                                           |
| --        | BCR      | 141-pPLCgamma2 | Mature CD38mid B   | 3.136E-05                          | 1.355E-02                                    | 1.072E-04                          | 4.630E-02                                    | Up                 | Both                                                           |
| --        | BCR      | 141-pPLCgamma2 | Mature CD38lo B    | 6.738E-05                          | 2.911E-02                                    | 1.815E-06                          | 7.841E-04                                    | Up                 | Both                                                           |
| --        | BCR      | 176-pCREB      | Mature CD38mid B   | 6.822E-05                          | 2.947E-02                                    | 2.053E-05                          | 8.868E-03                                    | Up                 | Both                                                           |
| --        | BCR      | 164-pSLP-76    | Mature CD38lo B    | 7.248E-05                          | 3.131E-02                                    | 5.071E-06                          | 2.191E-03                                    | Up                 | Both                                                           |
| --        | BCR      | 164-pSLP-76    | Immature B         | 7.616E-05                          | 3.290E-02                                    | n.s.                               | n.s.                                         | Up                 | Marrow 1 Only                                                  |
| --        | BCR      | 159-pSTAT3     | Immature B         | 1.078E-04                          | 4.656E-02                                    | n.s.                               | n.s.                                         | Up                 | Marrow 1 Only                                                  |
| --        | BCR      | 156-pZAP70/Syk | Immature B         | n.s.                               | n.s.                                         | 1.210E-05                          | 5.228E-03                                    | Up                 | Marrow 2 Only                                                  |
| --        | BCR      | 156-pZAP70/Syk | Mature CD38lo B    | n.s.                               | n.s.                                         | 3.440E-05                          | 1.486E-02                                    | Up                 | Marrow 2 Only                                                  |
| --        | BCR      | 156-pZAP70/Syk | Pre-B I            | n.s.                               | n.s.                                         | 5.413E-05                          | 2.338E-02                                    | Up                 | Marrow 2 Only                                                  |
| --        | BCR      | 151-pERK1/2    | HSC                | n.s.                               | n.s.                                         | 6.131E-05                          | 2.649E-02                                    | Down               | Marrow 2 Only                                                  |
| --        | BCR      | 151-pERK1/2    | Mature CD38lo B    | n.s.                               | n.s.                                         | 7.461E-05                          | 3.223E-02                                    | Up                 | Marrow 2 Only                                                  |
| --        | FIt3L    | 168-pH3        | CD11b- Monocytes   | 6.431E-06                          | 2.778E-03                                    | n.s.                               | n.s.                                         | Up                 | Marrow 1 Only                                                  |
| --        | FIt3L    | 176-pCREB      | Plasmacytoid DC    | 3.973E-05                          | 1.717E-02                                    | n.s.                               | n.s.                                         | Up                 | Marrow 1 Only                                                  |
| --        | FIt3L    | 152-Ki67       | Plasma cell        | n.s.                               | n.s.                                         | 2.290E-06                          | 9.892E-04                                    | Up                 | Marrow 2 Only                                                  |
| --        | FIt3L    | 176-pCREB      | MPP                | n.s.                               | n.s.                                         | 6.636E-06                          | 2.867E-03                                    | Up                 | Marrow 2 Only                                                  |
| --        | FIt3L    | 176-pCREB      | HSC                | n.s.                               | n.s.                                         | 1.763E-05                          | 7.618E-03                                    | Up                 | Marrow 2 Only                                                  |
| --        | FIt3L    | 151-pERK1/2    | HSC                | n.s.                               | n.s.                                         | 1.841E-05                          | 7.955E-03                                    | Up                 | Marrow 2 Only                                                  |
| --        | FIt3L    | 176-pCREB      | CMP                | n.s.                               | n.s.                                         | 4.204E-05                          | 1.816E-02                                    | Up                 | Marrow 2 Only                                                  |
| --        | GCSF     | 159-pSTAT3     | HSC                | 2.145E-08                          | 9.265E-06                                    | 2.796E-05                          | 1.208E-02                                    | Up                 | Both                                                           |
| --        | GCSF     | 169-pP38       | CD11bmid Monocytes | 1.192E-06                          | 5.147E-04                                    | n.s.                               | n.s.                                         | Up                 | Marrow 1 Only                                                  |
| --        | GCSF     | 159-pSTAT3     | CD11bhi Monocytes  | 3.222E-06                          | 1.392E-03                                    | 3.479E-07                          | 1.503E-04                                    | Up                 | Both                                                           |
| --        | GCSF     | 159-pSTAT3     | CD11bmid Monocytes | 4.077E-06                          | 1.761E-03                                    | 1.700E-05                          | 7.342E-03                                    | Up                 | Both                                                           |
| --        | GCSF     | 159-pSTAT3     | Immature B         | 5.152E-06                          | 2.226E-03                                    | 2.962E-06                          | 1.280E-03                                    | Up                 | Both                                                           |
| --        | GCSF     | 159-pSTAT3     | CD11b- Monocytes   | 9.124E-06                          | 3.942E-03                                    | 3.785E-05                          | 1.635E-02                                    | Up                 | Both                                                           |
| --        | GCSF     | 169-pP38       | CD11bhi Monocytes  | 1.274E-05                          | 5.502E-03                                    | n.s.                               | n.s.                                         | Up                 | Marrow 1 Only                                                  |
| --        | GCSF     | 159-pSTAT3     | MPP                | 2.169E-05                          | 9.368E-03                                    | 5.384E-06                          | 2.326E-03                                    | Up                 | Both                                                           |
| --        | GCSF     | 141-pPLCgamma2 | Platelet           | 2.741E-05                          | 1.184E-02                                    | n.s.                               | n.s.                                         | Up                 | Marrow 1 Only                                                  |
| --        | GCSF     | 168-pH3        | CD11b- Monocytes   | 3.388E-05                          | 1.463E-02                                    | n.s.                               | n.s.                                         | Up                 | Marrow 1 Only                                                  |
| --        | GCSF     | 169-pP38       | CD11b- Monocytes   | 4.201E-05                          | 1.815E-02                                    | n.s.                               | n.s.                                         | Up                 | Marrow 1 Only                                                  |
| --        | GCSF     | 176-pCREB      | HSC                | 4.383E-05                          | 1.893E-02                                    | n.s.                               | n.s.                                         | Up                 | Marrow 1 Only                                                  |
| --        | GCSF     | 174-pSrcFK     | CD11bhi Monocytes  | 8.398E-05                          | 3.628E-02                                    | n.s.                               | n.s.                                         | Up                 | Marrow 1 Only                                                  |
| --        | GCSF     | 175-pCrkL      | Platelet           | 9.149E-05                          | 3.953E-02                                    | n.s.                               | n.s.                                         | Up                 | Marrow 1 Only                                                  |
| --        | GCSF     | 174-pSrcFK     | CD11bmid Monocytes | 9.229E-05                          | 3.987E-02                                    | n.s.                               | n.s.                                         | Up                 | Marrow 1 Only                                                  |
| --        | GCSF     | 150-pSTAT5     | MPP                | 9.839E-05                          | 4.250E-02                                    | n.s.                               | n.s.                                         | Up                 | Marrow 1 Only                                                  |
| --        | GCSF     | 159-pSTAT3     | Myelocyte          | n.s.                               | n.s.                                         | 8.998E-07                          | 3.887E-04                                    | Up                 | Marrow 2 Only                                                  |
| --        | GCSF     | 159-pSTAT3     | Megakaryocyte      | n.s.                               | n.s.                                         | 3.067E-06                          | 1.325E-03                                    | Up                 | Marrow 2 Only                                                  |
| --        | GCSF     | 150-pSTAT5     | HSC                | n.s.                               | n.s.                                         | 3.941E-05                          | 1.703E-02                                    | Up                 | Marrow 2 Only                                                  |
| --        | GCSF     | 168-pH3        | Immature B         | n.s.                               | n.s.                                         | 7.642E-05                          | 3.301E-02                                    | Up                 | Marrow 2 Only                                                  |
| --        | GMCSF    | 150-pSTAT5     | CD11bmid Monocytes | 3.400E-06                          | 1.469E-03                                    | 1.437E-05                          | 6.210E-03                                    | Up                 | Both                                                           |
| --        | GMCSF    | 150-pSTAT5     | CD11bhi Monocytes  | 5.564E-06                          | 2.404E-03                                    | 2.182E-05                          | 9.426E-03                                    | Up                 | Both                                                           |
| --        | GMCSF    | 150-pSTAT5     | CD11b- Monocytes   | 6.452E-06                          | 2.787E-03                                    | 2.764E-05                          | 1.194E-02                                    | Up                 | Both                                                           |
| --        | GMCSF    | 150-pSTAT5     | Plasmacytoid DC    | 8.801E-06                          | 3.802E-03                                    | 5.661E-05                          | 2.445E-02                                    | Up                 | Both                                                           |
| --        | GMCSF    | 150-pSTAT5     | MEP                | 1.038E-05                          | 4.485E-03                                    | n.s.                               | n.s.                                         | Up                 | Marrow 1 Only                                                  |
| --        | GMCSF    | 176-pCREB      | Plasmacytoid DC    | 1.226E-05                          | 5.295E-03                                    | n.s.                               | n.s.                                         | Up                 | Marrow 1 Only                                                  |
| --        | GMCSF    | 168-pH3        | CD11b- Monocytes   | 1.358E-05                          | 5.867E-03                                    | n.s.                               | n.s.                                         | Up                 | Marrow 1 Only                                                  |
| --        | GMCSF    | 150-pSTAT5     | HSC                | 1.360E-05                          | 5.875E-03                                    | 6.819E-05                          | 2.946E-02                                    | Up                 | Both                                                           |
| --        | GMCSF    | 150-pSTAT5     | MPP                | 2.341E-05                          | 1.011E-02                                    | n.s.                               | n.s.                                         | Up                 | Marrow 1 Only                                                  |
| --        | GMCSF    | 168-pH3        | Plasmacytoid DC    | 2.724E-05                          | 1.177E-02                                    | 2.073E-05                          | 8.957E-03                                    | Up                 | Both                                                           |
| --        | GMCSF    | 169-pP38       | CD11bmid Monocytes | 5.265E-05                          | 2.274E-02                                    | n.s.                               | n.s.                                         | Up                 | Marrow 1 Only                                                  |
| --        | GMCSF    | 169-pP38       | CD11bhi Monocytes  | 5.365E-05                          | 2.318E-02                                    | n.s.                               | n.s.                                         | Up                 | Marrow 1 Only                                                  |
| --        | GMCSF    | 171-pBtk/Itk   | Mature CD38lo B    | 6.431E-05                          | 2.778E-02                                    | n.s.                               | n.s.                                         | Up                 | Marrow 1 Only                                                  |
| --        | GMCSF    | 168-pH3        | CD11bhi Monocytes  | 6.527E-05                          | 2.820E-02                                    | n.s.                               | n.s.                                         | Up                 | Marrow 1 Only                                                  |



| Inhibitor | Stimulus | Antibody     | Population         | Marrow 1 unadjusted t-test P value | Marrow 1 Bonferroni-corrected t-test P value | Marrow 2 unadjusted t-test P value | Marrow 2 Bonferroni-corrected t-test P value | Direction of Shift | Dataset(s) with significant shift (Bonferroni P < 0.05) |
|-----------|----------|--------------|--------------------|------------------------------------|----------------------------------------------|------------------------------------|----------------------------------------------|--------------------|---------------------------------------------------------|
| --        | GMCSF    | 159-pSTAT3   | HSC                | 6.673E-05                          | 2.883E-02                                    | n.s.                               | n.s.                                         | Up                 | Marrow 1 Only                                           |
| --        | GMCSF    | 171-pBtk/Itk | HSC                | 9.202E-05                          | 3.975E-02                                    | n.s.                               | n.s.                                         | Up                 | Marrow 1 Only                                           |
| --        | GMCSF    | 168-pH3      | Immature B         | n.s.                               | n.s.                                         | 8.760E-06                          | 3.784E-03                                    | Up                 | Marrow 2 Only                                           |
| --        | GMCSF    | 168-pH3      | Myelocyte          | n.s.                               | n.s.                                         | 2.526E-05                          | 1.091E-02                                    | Up                 | Marrow 2 Only                                           |
| --        | GMCSF    | 152-Ki67     | Plasma cell        | n.s.                               | n.s.                                         | 4.128E-05                          | 1.783E-02                                    | Down               | Marrow 2 Only                                           |
| --        | GMCSF    | 169-pP38     | Megakaryocyte      | n.s.                               | n.s.                                         | 5.396E-05                          | 2.331E-02                                    | Up                 | Marrow 2 Only                                           |
| --        | GMCSF    | 168-pH3      | Megakaryocyte      | n.s.                               | n.s.                                         | 8.316E-05                          | 3.592E-02                                    | Up                 | Marrow 2 Only                                           |
| --        | IFNad    | 159-pSTAT3   | HSC                | 6.771E-08                          | 2.925E-05                                    | n.s.                               | n.s.                                         | Up                 | Marrow 1 Only                                           |
| --        | IFNad    | 159-pSTAT3   | Immature B         | 1.048E-07                          | 4.527E-05                                    | 5.171E-06                          | 2.234E-03                                    | Up                 | Both                                                    |
| --        | IFNad    | 159-pSTAT3   | Plasma cell        | 2.060E-06                          | 8.897E-04                                    | n.s.                               | n.s.                                         | Up                 | Marrow 1 Only                                           |
| --        | IFNad    | 150-pSTAT5   | Naïve CD4+ T       | 3.833E-06                          | 1.656E-03                                    | n.s.                               | n.s.                                         | Up                 | Marrow 1 Only                                           |
| --        | IFNad    | 150-pSTAT5   | MEP                | 5.990E-06                          | 2.588E-03                                    | n.s.                               | n.s.                                         | Up                 | Marrow 1 Only                                           |
| --        | IFNad    | 150-pSTAT5   | Naïve CD8+ T       | 7.130E-06                          | 3.080E-03                                    | n.s.                               | n.s.                                         | Up                 | Marrow 1 Only                                           |
| --        | IFNad    | 159-pSTAT3   | CD11bhi Monocytes  | 7.224E-06                          | 3.121E-03                                    | 2.705E-06                          | 1.169E-03                                    | Up                 | Both                                                    |
| --        | IFNad    | 159-pSTAT3   | Mature CD4+ T      | 8.840E-06                          | 3.819E-03                                    | n.s.                               | n.s.                                         | Up                 | Marrow 1 Only                                           |
| --        | IFNad    | 150-pSTAT5   | Pre-B I            | 1.151E-05                          | 4.971E-03                                    | n.s.                               | n.s.                                         | Up                 | Marrow 1 Only                                           |
| --        | IFNad    | 159-pSTAT3   | CD11bmid Monocytes | 1.235E-05                          | 5.334E-03                                    | n.s.                               | n.s.                                         | Up                 | Marrow 1 Only                                           |
| --        | IFNad    | 159-pSTAT3   | Mature CD8+ T      | 1.585E-05                          | 6.847E-03                                    | n.s.                               | n.s.                                         | Up                 | Marrow 1 Only                                           |
| --        | IFNad    | 159-pSTAT3   | CD11b- Monocytes   | 1.710E-05                          | 7.389E-03                                    | n.s.                               | n.s.                                         | Up                 | Marrow 1 Only                                           |
| --        | IFNad    | 159-pSTAT3   | NK                 | 1.784E-05                          | 7.706E-03                                    | n.s.                               | n.s.                                         | Up                 | Marrow 1 Only                                           |
| --        | IFNad    | 159-pSTAT3   | Naïve CD8+ T       | 1.884E-05                          | 8.138E-03                                    | n.s.                               | n.s.                                         | Up                 | Marrow 1 Only                                           |
| --        | IFNad    | 150-pSTAT5   | MPP                | 2.047E-05                          | 8.843E-03                                    | n.s.                               | n.s.                                         | Up                 | Marrow 1 Only                                           |
| --        | IFNad    | 150-pSTAT5   | Mature CD4+ T      | 2.134E-05                          | 9.217E-03                                    | n.s.                               | n.s.                                         | Up                 | Marrow 1 Only                                           |
| --        | IFNad    | 159-pSTAT3   | Naïve CD4+ T       | 2.139E-05                          | 9.239E-03                                    | 7.314E-05                          | 3.160E-02                                    | Up                 | Both                                                    |
| --        | IFNad    | 159-pSTAT3   | Plasmacytoid DC    | 2.511E-05                          | 1.085E-02                                    | n.s.                               | n.s.                                         | Up                 | Marrow 1 Only                                           |
| --        | IFNad    | 150-pSTAT5   | Mature CD8+ T      | 3.568E-05                          | 1.542E-02                                    | n.s.                               | n.s.                                         | Up                 | Marrow 1 Only                                           |
| --        | IFNad    | 150-pSTAT5   | Mature CD38mid B   | 3.757E-05                          | 1.623E-02                                    | n.s.                               | n.s.                                         | Up                 | Marrow 1 Only                                           |
| --        | IFNad    | 174-pSrcFK   | CD11bmid Monocytes | 3.888E-05                          | 1.680E-02                                    | n.s.                               | n.s.                                         | Up                 | Marrow 1 Only                                           |
| --        | IFNad    | 174-pSrcFK   | CD11bhi Monocytes  | 4.042E-05                          | 1.746E-02                                    | n.s.                               | n.s.                                         | Up                 | Marrow 1 Only                                           |
| --        | IFNad    | 169-pP38     | CD11bmid Monocytes | 4.084E-05                          | 1.764E-02                                    | n.s.                               | n.s.                                         | Up                 | Marrow 1 Only                                           |
| --        | IFNad    | 159-pSTAT3   | Pre-B II           | 4.147E-05                          | 1.791E-02                                    | n.s.                               | n.s.                                         | Up                 | Marrow 1 Only                                           |
| --        | IFNad    | 174-pSrcFK   | CD11b- Monocytes   | 4.191E-05                          | 1.810E-02                                    | n.s.                               | n.s.                                         | Up                 | Marrow 1 Only                                           |
| --        | IFNad    | 150-pSTAT5   | HSC                | 4.262E-05                          | 1.841E-02                                    | 9.153E-05                          | 3.954E-02                                    | Up                 | Both                                                    |
| --        | IFNad    | 159-pSTAT3   | MPP                | 4.635E-05                          | 2.002E-02                                    | 3.724E-05                          | 1.609E-02                                    | Up                 | Both                                                    |
| --        | IFNad    | 159-pSTAT3   | CMP                | 5.230E-05                          | 2.259E-02                                    | n.s.                               | n.s.                                         | Up                 | Marrow 1 Only                                           |
| --        | IFNad    | 159-pSTAT3   | Mature CD38lo B    | 5.586E-05                          | 2.413E-02                                    | n.s.                               | n.s.                                         | Up                 | Marrow 1 Only                                           |
| --        | IFNad    | 150-pSTAT5   | Mature CD38lo B    | 5.806E-05                          | 2.508E-02                                    | n.s.                               | n.s.                                         | Up                 | Marrow 1 Only                                           |
| --        | IFNad    | 150-pSTAT5   | CMP                | 5.980E-05                          | 2.583E-02                                    | n.s.                               | n.s.                                         | Up                 | Marrow 1 Only                                           |
| --        | IFNad    | 159-pSTAT3   | MEP                | 6.270E-05                          | 2.709E-02                                    | n.s.                               | n.s.                                         | Up                 | Marrow 1 Only                                           |
| --        | IFNad    | 174-pSrcFK   | Pre-B II           | 7.249E-05                          | 3.132E-02                                    | n.s.                               | n.s.                                         | Up                 | Marrow 1 Only                                           |
| --        | IFNad    | 166-IkBalp   | MEP                | 9.622E-05                          | 4.157E-02                                    | n.s.                               | n.s.                                         | Up                 | Marrow 1 Only                                           |
| --        | IFNad    | 159-pSTAT3   | Myelocyte          | n.s.                               | n.s.                                         | 5.755E-06                          | 2.486E-03                                    | Up                 | Marrow 2 Only                                           |
| --        | IFNad    | 159-pSTAT3   | Megakaryocyte      | n.s.                               | n.s.                                         | 9.913E-06                          | 4.282E-03                                    | Up                 | Marrow 2 Only                                           |
| --        | IFNad    | 152-Ki67     | Plasma cell        | n.s.                               | n.s.                                         | 8.560E-05                          | 3.698E-02                                    | Down               | Marrow 2 Only                                           |
| --        | IL3      | 150-pSTAT5   | Plasmacytoid DC    | 5.519E-06                          | 2.384E-03                                    | 5.155E-05                          | 2.227E-02                                    | Up                 | Both                                                    |
| --        | IL3      | 176-pCREB    | Plasmacytoid DC    | 9.437E-06                          | 4.077E-03                                    | n.s.                               | n.s.                                         | Up                 | Marrow 1 Only                                           |
| --        | IL3      | 150-pSTAT5   | MEP                | 1.203E-05                          | 5.196E-03                                    | n.s.                               | n.s.                                         | Up                 | Marrow 1 Only                                           |
| --        | IL3      | 169-pP38     | CD11bmid Monocytes | 1.409E-05                          | 6.085E-03                                    | n.s.                               | n.s.                                         | Up                 | Marrow 1 Only                                           |
| --        | IL3      | 174-pSrcFK   | CD11bmid Monocytes | 1.826E-05                          | 7.886E-03                                    | n.s.                               | n.s.                                         | Up                 | Marrow 1 Only                                           |
| --        | IL3      | 159-pSTAT3   | Immature B         | 2.392E-05                          | 1.033E-02                                    | n.s.                               | n.s.                                         | Up                 | Marrow 1 Only                                           |
| --        | IL3      | 174-pSrcFK   | CD11b- Monocytes   | 3.071E-05                          | 1.327E-02                                    | n.s.                               | n.s.                                         | Up                 | Marrow 1 Only                                           |
| --        | IL3      | 159-pSTAT3   | HSC                | 3.281E-05                          | 1.417E-02                                    | n.s.                               | n.s.                                         | Up                 | Marrow 1 Only                                           |
| --        | IL3      | 168-pH3      | Plasmacytoid DC    | 3.955E-05                          | 1.709E-02                                    | 6.516E-06                          | 2.815E-03                                    | Up                 | Both                                                    |
| --        | IL3      | 174-pSrcFK   | CD11bhi Monocytes  | 4.314E-05                          | 1.864E-02                                    | n.s.                               | n.s.                                         | Up                 | Marrow 1 Only                                           |
| --        | IL3      | 172-pS6      | Plasmacytoid DC    | 6.594E-05                          | 2.848E-02                                    | n.s.                               | n.s.                                         | Up                 | Marrow 1 Only                                           |
| --        | IL3      | 174-pSrcFK   | Plasmacytoid DC    | 7.904E-05                          | 3.415E-02                                    | n.s.                               | n.s.                                         | Up                 | Marrow 1 Only                                           |
| --        | IL3      | 159-pSTAT3   | Plasmacytoid DC    | 8.049E-05                          | 3.477E-02                                    | n.s.                               | n.s.                                         | Up                 | Marrow 1 Only                                           |
| --        | IL3      | 150-pSTAT5   | CD11bmid Monocytes | n.s.                               | n.s.                                         | 2.847E-05                          | 1.230E-02                                    | Up                 | Marrow 2 Only                                           |
| --        | IL3      | 150-pSTAT5   | CD11b- Monocytes   | n.s.                               | n.s.                                         | 2.998E-05                          | 1.295E-02                                    | Up                 | Marrow 2 Only                                           |
| --        | IL3      | 150-pSTAT5   | HSC                | n.s.                               | n.s.                                         | 8.769E-05                          | 3.788E-02                                    | Up                 | Marrow 2 Only                                           |
| --        | IL7      | 150-pSTAT5   | Naïve CD4+ T       | 2.308E-06                          | 9.970E-04                                    | 2.796E-05                          | 1.208E-02                                    | Up                 | Both                                                    |
| --        | IL7      | 150-pSTAT5   | Naïve CD8+ T       | 3.347E-06                          | 1.446E-03                                    | 3.046E-05                          | 1.316E-02                                    | Up                 | Both                                                    |
| --        | IL7      | 150-pSTAT5   | Mature CD4+ T      | 7.826E-06                          | 3.381E-03                                    | 1.458E-05                          | 6.297E-03                                    | Up                 | Both                                                    |
| --        | IL7      | 150-pSTAT5   | Mature CD8+ T      | 9.972E-06                          | 4.308E-03                                    | 3.868E-05                          | 1.671E-02                                    | Up                 | Both                                                    |
| --        | LPS      | 169-pP38     | CD11bmid Monocytes | 1.454E-07                          | 6.281E-05                                    | n.s.                               | n.s.                                         | Up                 | Marrow 1 Only                                           |
| --        | LPS      | 166-IkBalp   | CD11bhi Monocytes  | 3.171E-07                          | 1.370E-04                                    | n.s.                               | n.s.                                         | Down               | Marrow 1 Only                                           |
| --        | LPS      | 169-pP38     | CD11bhi Monocytes  | 1.318E-06                          | 5.693E-04                                    | n.s.                               | n.s.                                         | Up                 | Marrow 1 Only                                           |
| --        | LPS      | 166-IkBalp   | CD11bmid Monocytes | 1.323E-06                          | 5.715E-04                                    | n.s.                               | n.s.                                         | Down               | Marrow 1 Only                                           |

| Inhibitor | Stimulus | Antibody      | Population         | Marrow 1 unadjusted t-test P value | Marrow 1 Bonferroni-corrected t-test P value | Marrow 2 unadjusted t-test P value | Marrow 2 Bonferroni-corrected t-test P value | Direction of Shift | Dataset(s) with significant shift (Bonferroni P < 0.05) |
|-----------|----------|---------------|--------------------|------------------------------------|----------------------------------------------|------------------------------------|----------------------------------------------|--------------------|---------------------------------------------------------|
| --        | LPS      | 169-pP38      | CD11b- Monocytes   | 7.408E-06                          | 3.200E-03                                    | n.s.                               | n.s.                                         | Up                 | Marrow 1 Only                                           |
| --        | LPS      | 166-IkBalp    | CD11b- Monocytes   | 1.254E-05                          | 5.418E-03                                    | n.s.                               | n.s.                                         | Down               | Marrow 1 Only                                           |
| --        | LPS      | 168-pH3       | CD11b- Monocytes   | 1.652E-05                          | 7.139E-03                                    | n.s.                               | n.s.                                         | Up                 | Marrow 1 Only                                           |
| --        | LPS      | 166-IkBalp    | MEP                | 5.279E-05                          | 2.281E-02                                    | n.s.                               | n.s.                                         | Down               | Marrow 1 Only                                           |
| --        | LPS      | 168-pH3       | CD11bmid Monocytes | 9.318E-05                          | 4.026E-02                                    | n.s.                               | n.s.                                         | Up                 | Marrow 1 Only                                           |
| --        | LPS      | 153-pMAPKAPK2 | CD11bmid Monocytes | n.s.                               | n.s.                                         | 2.561E-05                          | 1.106E-02                                    | Up                 | Marrow 2 Only                                           |
| --        | LPS      | 153-pMAPKAPK2 | CD11bhi Monocytes  | n.s.                               | n.s.                                         | 4.456E-05                          | 1.925E-02                                    | Up                 | Marrow 2 Only                                           |
| --        | LPS      | 153-pMAPKAPK2 | CD11b- Monocytes   | n.s.                               | n.s.                                         | 1.003E-04                          | 4.331E-02                                    | Up                 | Marrow 2 Only                                           |
| --        | PMAiono  | 176-pCREB     | Naïve CD4+ T       | 1.146E-07                          | 4.952E-05                                    | 1.873E-06                          | 8.092E-04                                    | Up                 | Both                                                    |
| --        | PMAiono  | 151-pERK1/2   | Plasma cell        | 1.497E-07                          | 6.468E-05                                    | n.s.                               | n.s.                                         | Up                 | Marrow 1 Only                                           |
| --        | PMAiono  | 172-pS6       | Mature CD4+ T      | 5.610E-07                          | 2.423E-04                                    | 5.481E-05                          | 2.368E-02                                    | Up                 | Both                                                    |
| --        | PMAiono  | 168-pH3       | CD11b- Monocytes   | 6.731E-07                          | 2.908E-04                                    | n.s.                               | n.s.                                         | Up                 | Marrow 1 Only                                           |
| --        | PMAiono  | 172-pS6       | Naïve CD8+ T       | 7.120E-07                          | 3.076E-04                                    | n.s.                               | n.s.                                         | Up                 | Marrow 1 Only                                           |
| --        | PMAiono  | 168-pH3       | Naïve CD4+ T       | 1.399E-06                          | 6.046E-04                                    | 1.132E-06                          | 4.890E-04                                    | Up                 | Both                                                    |
| --        | PMAiono  | 174-pSrcFK    | CD11bhi Monocytes  | 1.935E-06                          | 8.359E-04                                    | 2.727E-05                          | 1.178E-02                                    | Down               | Both                                                    |
| --        | PMAiono  | 172-pS6       | Naïve CD4+ T       | 1.953E-06                          | 8.439E-04                                    | n.s.                               | n.s.                                         | Up                 | Marrow 1 Only                                           |
| --        | PMAiono  | 168-pH3       | Plasmacytoid DC    | 1.968E-06                          | 8.502E-04                                    | 3.073E-07                          | 1.328E-04                                    | Up                 | Both                                                    |
| --        | PMAiono  | 165-pNFkB     | Naïve CD8+ T       | 4.226E-06                          | 1.826E-03                                    | n.s.                               | n.s.                                         | Up                 | Marrow 1 Only                                           |
| --        | PMAiono  | 168-pH3       | CD11bmid Monocytes | 4.299E-06                          | 1.857E-03                                    | n.s.                               | n.s.                                         | Up                 | Marrow 1 Only                                           |
| --        | PMAiono  | 169-pP38      | CD11bmid Monocytes | 4.400E-06                          | 1.901E-03                                    | n.s.                               | n.s.                                         | Up                 | Marrow 1 Only                                           |
| --        | PMAiono  | 172-pS6       | Pre-B I            | 4.818E-06                          | 2.081E-03                                    | n.s.                               | n.s.                                         | Up                 | Marrow 1 Only                                           |
| --        | PMAiono  | 165-pNFkB     | Naïve CD4+ T       | 5.104E-06                          | 2.205E-03                                    | 4.986E-05                          | 2.154E-02                                    | Up                 | Both                                                    |
| --        | PMAiono  | 168-pH3       | Mature CD4+ T      | 7.999E-06                          | 3.456E-03                                    | 2.127E-07                          | 9.189E-05                                    | Up                 | Both                                                    |
| --        | PMAiono  | 168-pH3       | Mature CD38lo B    | 8.514E-06                          | 3.678E-03                                    | 1.752E-06                          | 7.569E-04                                    | Up                 | Both                                                    |
| --        | PMAiono  | 172-pS6       | Plasmacytoid DC    | 9.519E-06                          | 4.112E-03                                    | 6.476E-05                          | 2.798E-02                                    | Up                 | Both                                                    |
| --        | PMAiono  | 172-pS6       | Pre-B II           | 1.047E-05                          | 4.523E-03                                    | n.s.                               | n.s.                                         | Up                 | Marrow 1 Only                                           |
| --        | PMAiono  | 168-pH3       | CD11bhi Monocytes  | 1.103E-05                          | 4.764E-03                                    | n.s.                               | n.s.                                         | Up                 | Marrow 1 Only                                           |
| --        | PMAiono  | 169-pP38      | CD11bhi Monocytes  | 1.263E-05                          | 5.458E-03                                    | n.s.                               | n.s.                                         | Up                 | Marrow 1 Only                                           |
| --        | PMAiono  | 176-pCREB     | Plasmacytoid DC    | 1.268E-05                          | 5.477E-03                                    | 6.021E-05                          | 2.601E-02                                    | Up                 | Both                                                    |
| --        | PMAiono  | 168-pH3       | Immature B         | 1.320E-05                          | 5.701E-03                                    | 1.334E-07                          | 5.761E-05                                    | Up                 | Both                                                    |
| --        | PMAiono  | 174-pSrcFK    | CD11bmid Monocytes | 1.444E-05                          | 6.240E-03                                    | n.s.                               | n.s.                                         | Down               | Marrow 1 Only                                           |
| --        | PMAiono  | 176-pCREB     | Pre-B I            | 1.527E-05                          | 6.596E-03                                    | 1.117E-06                          | 4.828E-04                                    | Up                 | Both                                                    |
| --        | PMAiono  | 168-pH3       | Naïve CD8+ T       | 1.744E-05                          | 7.535E-03                                    | 1.065E-05                          | 4.599E-03                                    | Up                 | Both                                                    |
| --        | PMAiono  | 159-pSTAT3    | Immature B         | 1.754E-05                          | 7.575E-03                                    | n.s.                               | n.s.                                         | Up                 | Marrow 1 Only                                           |
| --        | PMAiono  | 151-pERK1/2   | CD11b- Monocytes   | 1.800E-05                          | 7.778E-03                                    | n.s.                               | n.s.                                         | Up                 | Marrow 1 Only                                           |
| --        | PMAiono  | 169-pP38      | Mature CD8+ T      | 2.028E-05                          | 8.760E-03                                    | n.s.                               | n.s.                                         | Up                 | Marrow 1 Only                                           |
| --        | PMAiono  | 176-pCREB     | Mature CD38lo B    | 2.131E-05                          | 9.207E-03                                    | 4.630E-06                          | 2.000E-03                                    | Up                 | Both                                                    |
| --        | PMAiono  | 172-pS6       | CD11b- Monocytes   | 2.385E-05                          | 1.030E-02                                    | n.s.                               | n.s.                                         | Up                 | Marrow 1 Only                                           |
| --        | PMAiono  | 176-pCREB     | Naïve CD8+ T       | 2.534E-05                          | 1.095E-02                                    | 1.998E-05                          | 8.632E-03                                    | Up                 | Both                                                    |
| --        | PMAiono  | 151-pERK1/2   | HSC                | 2.761E-05                          | 1.193E-02                                    | 4.767E-08                          | 2.060E-05                                    | Up                 | Both                                                    |
| --        | PMAiono  | 169-pP38      | Mature CD4+ T      | 2.874E-05                          | 1.242E-02                                    | n.s.                               | n.s.                                         | Up                 | Marrow 1 Only                                           |
| --        | PMAiono  | 172-pS6       | Immature B         | 3.057E-05                          | 1.320E-02                                    | n.s.                               | n.s.                                         | Up                 | Marrow 1 Only                                           |
| --        | PMAiono  | 168-pH3       | HSC                | 3.146E-05                          | 1.359E-02                                    | 6.630E-06                          | 2.864E-03                                    | Up                 | Both                                                    |
| --        | PMAiono  | 172-pS6       | GMP                | 3.195E-05                          | 1.380E-02                                    | n.s.                               | n.s.                                         | Up                 | Marrow 1 Only                                           |
| --        | PMAiono  | 151-pERK1/2   | CD11bmid Monocytes | 3.472E-05                          | 1.500E-02                                    | n.s.                               | n.s.                                         | Up                 | Marrow 1 Only                                           |
| --        | PMAiono  | 172-pS6       | CD11bmid Monocytes | 3.494E-05                          | 1.509E-02                                    | n.s.                               | n.s.                                         | Up                 | Marrow 1 Only                                           |
| --        | PMAiono  | 151-pERK1/2   | Immature B         | 3.629E-05                          | 1.568E-02                                    | 6.763E-05                          | 2.922E-02                                    | Up                 | Both                                                    |
| --        | PMAiono  | 168-pH3       | MPP                | 3.892E-05                          | 1.681E-02                                    | 1.161E-05                          | 5.017E-03                                    | Up                 | Both                                                    |
| --        | PMAiono  | 169-pP38      | HSC                | 4.274E-05                          | 1.846E-02                                    | n.s.                               | n.s.                                         | Up                 | Marrow 1 Only                                           |
| --        | PMAiono  | 172-pS6       | Mature CD8+ T      | 4.475E-05                          | 1.933E-02                                    | n.s.                               | n.s.                                         | Up                 | Marrow 1 Only                                           |
| --        | PMAiono  | 172-pS6       | HSC                | 4.974E-05                          | 2.149E-02                                    | n.s.                               | n.s.                                         | Up                 | Marrow 1 Only                                           |
| --        | PMAiono  | 151-pERK1/2   | CD11bhi Monocytes  | 5.029E-05                          | 2.172E-02                                    | n.s.                               | n.s.                                         | Up                 | Marrow 1 Only                                           |
| --        | PMAiono  | 176-pCREB     | Mature CD38mid B   | 5.254E-05                          | 2.270E-02                                    | 4.807E-06                          | 2.077E-03                                    | Up                 | Both                                                    |
| --        | PMAiono  | 172-pS6       | Mature CD38lo B    | 5.596E-05                          | 2.418E-02                                    | n.s.                               | n.s.                                         | Up                 | Marrow 1 Only                                           |
| --        | PMAiono  | 151-pERK1/2   | MEP                | 8.178E-05                          | 3.533E-02                                    | 2.752E-07                          | 1.189E-04                                    | Up                 | Both                                                    |
| --        | PMAiono  | 153-pMAPKAPK2 | Naïve CD4+ T       | 8.230E-05                          | 3.555E-02                                    | 2.142E-05                          | 9.253E-03                                    | Up                 | Both                                                    |
| --        | PMAiono  | 172-pS6       | MEP                | 8.475E-05                          | 3.661E-02                                    | n.s.                               | n.s.                                         | Up                 | Marrow 1 Only                                           |
| --        | PMAiono  | 176-pCREB     | HSC                | 8.490E-05                          | 3.668E-02                                    | 1.257E-05                          | 5.429E-03                                    | Up                 | Both                                                    |
| --        | PMAiono  | 151-pERK1/2   | Naïve CD4+ T       | 8.743E-05                          | 3.777E-02                                    | 4.076E-08                          | 1.761E-05                                    | Up                 | Both                                                    |
| --        | PMAiono  | 176-pCREB     | Pre-B II           | 9.205E-05                          | 3.977E-02                                    | 6.702E-06                          | 2.895E-03                                    | Up                 | Both                                                    |
| --        | PMAiono  | 169-pP38      | Naïve CD8+ T       | 9.776E-05                          | 4.223E-02                                    | n.s.                               | n.s.                                         | Up                 | Marrow 1 Only                                           |
| --        | PMAiono  | 153-pMAPKAPK2 | Naïve CD8+ T       | 1.005E-04                          | 4.340E-02                                    | 1.696E-05                          | 7.328E-03                                    | Up                 | Both                                                    |
| --        | PMAiono  | 166-IkBalp    | CD11bhi Monocytes  | 1.119E-04                          | 4.836E-02                                    | n.s.                               | n.s.                                         | Up                 | Marrow 1 Only                                           |
| --        | PMAiono  | 151-pERK1/2   | Mature CD4+ T      | n.s.                               | n.s.                                         | 1.035E-08                          | 4.470E-06                                    | Up                 | Marrow 2 Only                                           |
| --        | PMAiono  | 151-pERK1/2   | Mature CD38lo B    | n.s.                               | n.s.                                         | 8.653E-08                          | 3.738E-05                                    | Up                 | Marrow 2 Only                                           |
| --        | PMAiono  | 151-pERK1/2   | Naïve CD8+ T       | n.s.                               | n.s.                                         | 3.374E-07                          | 1.457E-04                                    | Up                 | Marrow 2 Only                                           |
| --        | PMAiono  | 151-pERK1/2   | Mature CD8+ T      | n.s.                               | n.s.                                         | 8.333E-07                          | 3.600E-04                                    | Up                 | Marrow 2 Only                                           |
| --        | PMAiono  | 176-pCREB     | CMP                | n.s.                               | n.s.                                         | 1.213E-06                          | 5.241E-04                                    | Up                 | Marrow 2 Only                                           |

| Inhibitor | Stimulus | Antibody       | Population         | Marrow 1 unadjusted t-test P value | Marrow 1 Bonferroni-corrected t-test P value | Marrow 2 unadjusted t-test P value | Marrow 2 Bonferroni-corrected t-test P value | Direction of Shift | Dataset(s) with significant shift (Bonferroni P < 0.05) |
|-----------|----------|----------------|--------------------|------------------------------------|----------------------------------------------|------------------------------------|----------------------------------------------|--------------------|---------------------------------------------------------|
| --        | PMAi0    | 151-pERK1/2    | MPP                | n.s.                               | n.s.                                         | 2.087E-06                          | 9.015E-04                                    | Up                 | Marrow 2 Only                                           |
| --        | PMAi0    | 176-pCREB      | MPP                | n.s.                               | n.s.                                         | 2.639E-06                          | 1.140E-03                                    | Up                 | Marrow 2 Only                                           |
| --        | PMAi0    | 151-pERK1/2    | CMP                | n.s.                               | n.s.                                         | 2.969E-06                          | 1.283E-03                                    | Up                 | Marrow 2 Only                                           |
| --        | PMAi0    | 151-pERK1/2    | NK                 | n.s.                               | n.s.                                         | 2.996E-06                          | 1.294E-03                                    | Up                 | Marrow 2 Only                                           |
| --        | PMAi0    | 151-pERK1/2    | Mature CD38mid B   | n.s.                               | n.s.                                         | 3.107E-06                          | 1.342E-03                                    | Up                 | Marrow 2 Only                                           |
| --        | PMAi0    | 153-pMAPKAPK2  | GMP                | n.s.                               | n.s.                                         | 3.757E-06                          | 1.623E-03                                    | Up                 | Marrow 2 Only                                           |
| --        | PMAi0    | 151-pERK1/2    | Pre-B II           | n.s.                               | n.s.                                         | 4.605E-06                          | 1.989E-03                                    | Up                 | Marrow 2 Only                                           |
| --        | PMAi0    | 151-pERK1/2    | GMP                | n.s.                               | n.s.                                         | 4.846E-06                          | 2.094E-03                                    | Up                 | Marrow 2 Only                                           |
| --        | PMAi0    | 153-pMAPKAPK2  | Mature CD4+ T      | n.s.                               | n.s.                                         | 5.543E-06                          | 2.394E-03                                    | Up                 | Marrow 2 Only                                           |
| --        | PMAi0    | 153-pMAPKAPK2  | Mature CD8+ T      | n.s.                               | n.s.                                         | 6.162E-06                          | 2.662E-03                                    | Up                 | Marrow 2 Only                                           |
| --        | PMAi0    | 176-pCREB      | Mature CD4+ T      | n.s.                               | n.s.                                         | 6.494E-06                          | 2.806E-03                                    | Up                 | Marrow 2 Only                                           |
| --        | PMAi0    | 153-pMAPKAPK2  | Immature B         | n.s.                               | n.s.                                         | 7.814E-06                          | 3.376E-03                                    | Up                 | Marrow 2 Only                                           |
| --        | PMAi0    | 156-pZAP70/Syk | Immature B         | n.s.                               | n.s.                                         | 8.498E-06                          | 3.671E-03                                    | Up                 | Marrow 2 Only                                           |
| --        | PMAi0    | 176-pCREB      | NK                 | n.s.                               | n.s.                                         | 8.620E-06                          | 3.724E-03                                    | Up                 | Marrow 2 Only                                           |
| --        | PMAi0    | 168-pH3        | Myelocyte          | n.s.                               | n.s.                                         | 9.188E-06                          | 3.969E-03                                    | Up                 | Marrow 2 Only                                           |
| --        | PMAi0    | 156-pZAP70/Syk | Pre-B I            | n.s.                               | n.s.                                         | 1.064E-05                          | 4.597E-03                                    | Up                 | Marrow 2 Only                                           |
| --        | PMAi0    | 172-pS6        | Plasma cell        | n.s.                               | n.s.                                         | 1.180E-05                          | 5.098E-03                                    | Up                 | Marrow 2 Only                                           |
| --        | PMAi0    | 153-pMAPKAPK2  | Mature CD38lo B    | n.s.                               | n.s.                                         | 1.253E-05                          | 5.412E-03                                    | Up                 | Marrow 2 Only                                           |
| --        | PMAi0    | 153-pMAPKAPK2  | Pre-B II           | n.s.                               | n.s.                                         | 1.373E-05                          | 5.932E-03                                    | Up                 | Marrow 2 Only                                           |
| --        | PMAi0    | 141-pPLCgamma2 | MPP                | n.s.                               | n.s.                                         | 1.373E-05                          | 5.932E-03                                    | Up                 | Marrow 2 Only                                           |
| --        | PMAi0    | 168-pH3        | Mature CD8+ T      | n.s.                               | n.s.                                         | 1.471E-05                          | 6.355E-03                                    | Up                 | Marrow 2 Only                                           |
| --        | PMAi0    | 141-pPLCgamma2 | MEP                | n.s.                               | n.s.                                         | 1.561E-05                          | 6.743E-03                                    | Up                 | Marrow 2 Only                                           |
| --        | PMAi0    | 156-pZAP70/Syk | Naïve CD4+ T       | n.s.                               | n.s.                                         | 1.815E-05                          | 7.839E-03                                    | Up                 | Marrow 2 Only                                           |
| --        | PMAi0    | 153-pMAPKAPK2  | Pre-B I            | n.s.                               | n.s.                                         | 1.836E-05                          | 7.930E-03                                    | Up                 | Marrow 2 Only                                           |
| --        | PMAi0    | 176-pCREB      | GMP                | n.s.                               | n.s.                                         | 1.994E-05                          | 8.612E-03                                    | Up                 | Marrow 2 Only                                           |
| --        | PMAi0    | 165-pNFkB      | Mature CD4+ T      | n.s.                               | n.s.                                         | 2.244E-05                          | 9.696E-03                                    | Up                 | Marrow 2 Only                                           |
| --        | PMAi0    | 153-pMAPKAPK2  | MEP                | n.s.                               | n.s.                                         | 2.309E-05                          | 9.974E-03                                    | Up                 | Marrow 2 Only                                           |
| --        | PMAi0    | 176-pCREB      | MEP                | n.s.                               | n.s.                                         | 2.944E-05                          | 1.272E-02                                    | Up                 | Marrow 2 Only                                           |
| --        | PMAi0    | 151-pERK1/2    | Pre-B I            | n.s.                               | n.s.                                         | 3.005E-05                          | 1.298E-02                                    | Up                 | Marrow 2 Only                                           |
| --        | PMAi0    | 165-pNFkB      | Plasmacytoid DC    | n.s.                               | n.s.                                         | 3.139E-05                          | 1.356E-02                                    | Up                 | Marrow 2 Only                                           |
| --        | PMAi0    | 153-pMAPKAPK2  | Plasmacytoid DC    | n.s.                               | n.s.                                         | 3.376E-05                          | 1.459E-02                                    | Up                 | Marrow 2 Only                                           |
| --        | PMAi0    | 168-pH3        | MEP                | n.s.                               | n.s.                                         | 3.730E-05                          | 1.612E-02                                    | Up                 | Marrow 2 Only                                           |
| --        | PMAi0    | 153-pMAPKAPK2  | NK                 | n.s.                               | n.s.                                         | 3.809E-05                          | 1.646E-02                                    | Up                 | Marrow 2 Only                                           |
| --        | PMAi0    | 141-pPLCgamma2 | Pre-B I            | n.s.                               | n.s.                                         | 4.106E-05                          | 1.774E-02                                    | Up                 | Marrow 2 Only                                           |
| --        | PMAi0    | 153-pMAPKAPK2  | HSC                | n.s.                               | n.s.                                         | 4.125E-05                          | 1.782E-02                                    | Up                 | Marrow 2 Only                                           |
| --        | PMAi0    | 141-pPLCgamma2 | Plasmacytoid DC    | n.s.                               | n.s.                                         | 4.217E-05                          | 1.822E-02                                    | Up                 | Marrow 2 Only                                           |
| --        | PMAi0    | 153-pMAPKAPK2  | Mature CD38mid B   | n.s.                               | n.s.                                         | 4.244E-05                          | 1.833E-02                                    | Up                 | Marrow 2 Only                                           |
| --        | PMAi0    | 176-pCREB      | Mature CD8+ T      | n.s.                               | n.s.                                         | 4.245E-05                          | 1.834E-02                                    | Up                 | Marrow 2 Only                                           |
| --        | PMAi0    | 152-Ki67       | Plasma cell        | n.s.                               | n.s.                                         | 4.810E-05                          | 2.078E-02                                    | Up                 | Marrow 2 Only                                           |
| --        | PMAi0    | 168-pH3        | CMP                | n.s.                               | n.s.                                         | 5.591E-05                          | 2.415E-02                                    | Up                 | Marrow 2 Only                                           |
| --        | PMAi0    | 168-pH3        | NK                 | n.s.                               | n.s.                                         | 7.292E-05                          | 3.150E-02                                    | Up                 | Marrow 2 Only                                           |
| --        | PMAi0    | 156-pZAP70/Syk | Mature CD4+ T      | n.s.                               | n.s.                                         | 8.141E-05                          | 3.517E-02                                    | Up                 | Marrow 2 Only                                           |
| --        | PMAi0    | 172-pS6        | MPP                | n.s.                               | n.s.                                         | 9.625E-05                          | 4.158E-02                                    | Up                 | Marrow 2 Only                                           |
| --        | PMAi0    | 153-pMAPKAPK2  | CD11bmid Monocytes | n.s.                               | n.s.                                         | 1.027E-04                          | 4.436E-02                                    | Up                 | Marrow 2 Only                                           |
| --        | PMAi0    | 152-Ki67       | CD11bhi Monocytes  | n.s.                               | n.s.                                         | 1.027E-04                          | 4.438E-02                                    | Up                 | Marrow 2 Only                                           |
| --        | PMAi0    | 176-pCREB      | Immature B         | n.s.                               | n.s.                                         | 1.101E-04                          | 4.758E-02                                    | Up                 | Marrow 2 Only                                           |
| --        | PMAi0    | 168-pH3        | GMP                | n.s.                               | n.s.                                         | 1.110E-04                          | 4.797E-02                                    | Up                 | Marrow 2 Only                                           |
| --        | PMAi0    | 156-pZAP70/Syk | MPP                | n.s.                               | n.s.                                         | 1.141E-04                          | 4.928E-02                                    | Up                 | Marrow 2 Only                                           |
| --        | PVO4     | 169-pP38       | CD11bmid Monocytes | 3.162E-09                          | 1.366E-06                                    | 5.029E-05                          | 2.172E-02                                    | Up                 | Both                                                    |
| --        | PVO4     | 159-pSTAT3     | Immature B         | 2.703E-08                          | 1.168E-05                                    | 2.431E-08                          | 1.050E-05                                    | Up                 | Both                                                    |
| --        | PVO4     | 164-pSLP-76    | Immature B         | 4.046E-08                          | 1.748E-05                                    | 8.025E-13                          | 3.467E-10                                    | Up                 | Both                                                    |
| --        | PVO4     | 174-pSrcFK     | CD11bmid Monocytes | 5.887E-08                          | 2.543E-05                                    | 9.801E-07                          | 4.234E-04                                    | Up                 | Both                                                    |
| --        | PVO4     | 151-pERK1/2    | Plasma cell        | 6.167E-08                          | 2.664E-05                                    | n.s.                               | n.s.                                         | Up                 | Marrow 1 Only                                           |
| --        | PVO4     | 169-pP38       | CD11bhi Monocytes  | 9.895E-08                          | 4.275E-05                                    | 7.292E-05                          | 3.150E-02                                    | Up                 | Both                                                    |
| --        | PVO4     | 141-pPLCgamma2 | Immature B         | 1.134E-07                          | 4.900E-05                                    | 2.709E-09                          | 1.170E-06                                    | Up                 | Both                                                    |
| --        | PVO4     | 176-pCREB      | Naïve CD4+ T       | 1.214E-07                          | 5.243E-05                                    | 3.147E-06                          | 1.360E-03                                    | Up                 | Both                                                    |
| --        | PVO4     | 174-pSrcFK     | CD11b- Monocytes   | 1.438E-07                          | 6.213E-05                                    | 6.895E-06                          | 2.979E-03                                    | Up                 | Both                                                    |
| --        | PVO4     | 174-pSrcFK     | CD11bhi Monocytes  | 1.542E-07                          | 6.661E-05                                    | 2.563E-07                          | 1.107E-04                                    | Up                 | Both                                                    |
| --        | PVO4     | 169-pP38       | CD11b- Monocytes   | 1.543E-07                          | 6.664E-05                                    | 9.719E-05                          | 4.199E-02                                    | Up                 | Both                                                    |
| --        | PVO4     | 141-pPLCgamma2 | Mature CD4+ T      | 1.784E-07                          | 7.707E-05                                    | 2.818E-10                          | 1.217E-07                                    | Up                 | Both                                                    |
| --        | PVO4     | 164-pSLP-76    | Naïve CD4+ T       | 2.178E-07                          | 9.408E-05                                    | 4.722E-10                          | 2.040E-07                                    | Up                 | Both                                                    |
| --        | PVO4     | 164-pSLP-76    | Naïve CD8+ T       | 2.428E-07                          | 1.049E-04                                    | 1.812E-10                          | 7.827E-08                                    | Up                 | Both                                                    |
| --        | PVO4     | 141-pPLCgamma2 | Mature CD8+ T      | 2.441E-07                          | 1.055E-04                                    | 1.071E-09                          | 4.626E-07                                    | Up                 | Both                                                    |
| --        | PVO4     | 164-pSLP-76    | Mature CD4+ T      | 3.434E-07                          | 1.483E-04                                    | 4.516E-11                          | 1.951E-08                                    | Up                 | Both                                                    |
| --        | PVO4     | 141-pPLCgamma2 | Naïve CD8+ T       | 3.762E-07                          | 1.625E-04                                    | 1.791E-07                          | 7.738E-05                                    | Up                 | Both                                                    |
| --        | PVO4     | 164-pSLP-76    | Plasma cell        | 4.887E-07                          | 2.111E-04                                    | 8.924E-05                          | 3.855E-02                                    | Up                 | Both                                                    |
| --        | PVO4     | 164-pSLP-76    | CD11bmid Monocytes | 5.981E-07                          | 2.584E-04                                    | 2.260E-08                          | 9.762E-06                                    | Up                 | Both                                                    |
| --        | PVO4     | 164-pSLP-76    | Mature CD8+ T      | 6.696E-07                          | 2.893E-04                                    | 2.110E-10                          | 9.115E-08                                    | Up                 | Both                                                    |

| Inhibitor | Stimulus | Antibody       | Population         | Marrow 1 unadjusted t-test P value | Marrow 1 Bonferroni-corrected t-test P value | Marrow 2 unadjusted t-test P value | Marrow 2 Bonferroni-corrected t-test P value | Direction of Shift | Dataset(s) with significant shift (Bonferroni P < 0.05) |
|-----------|----------|----------------|--------------------|------------------------------------|----------------------------------------------|------------------------------------|----------------------------------------------|--------------------|---------------------------------------------------------|
| --        | PVO4     | 164-pSLP-76    | CD11b- Monocytes   | 6.742E-07                          | 2.912E-04                                    | 3.772E-08                          | 1.629E-05                                    | Up                 | Both                                                    |
| --        | PVO4     | 159-pSTAT3     | CD11bmid Monocytes | 6.884E-07                          | 2.974E-04                                    | 1.467E-06                          | 6.335E-04                                    | Up                 | Both                                                    |
| --        | PVO4     | 174-pSrcFK     | Pre-B II           | 7.402E-07                          | 3.197E-04                                    | 5.139E-06                          | 2.220E-03                                    | Up                 | Both                                                    |
| --        | PVO4     | 154-pSHP2      | Immature B         | 8.661E-07                          | 3.741E-04                                    | 9.168E-09                          | 3.961E-06                                    | Up                 | Both                                                    |
| --        | PVO4     | 164-pSLP-76    | Pre-B I            | 9.722E-07                          | 4.200E-04                                    | 3.711E-05                          | 1.603E-02                                    | Up                 | Both                                                    |
| --        | PVO4     | 141-pPLCgamma2 | CD11b- Monocytes   | 1.157E-06                          | 4.998E-04                                    | 1.953E-08                          | 8.436E-06                                    | Up                 | Both                                                    |
| --        | PVO4     | 141-pPLCgamma2 | Plasma cell        | 1.167E-06                          | 5.043E-04                                    | 2.685E-07                          | 1.160E-04                                    | Up                 | Both                                                    |
| --        | PVO4     | 175-pCrkL      | Immature B         | 1.305E-06                          | 5.638E-04                                    | 6.213E-08                          | 2.684E-05                                    | Up                 | Both                                                    |
| --        | PVO4     | 169-pP38       | Mature CD8+ T      | 1.466E-06                          | 6.335E-04                                    | 7.564E-05                          | 3.268E-02                                    | Up                 | Both                                                    |
| --        | PVO4     | 141-pPLCgamma2 | Platelet           | 1.518E-06                          | 6.559E-04                                    | 4.331E-06                          | 1.871E-03                                    | Up                 | Both                                                    |
| --        | PVO4     | 141-pPLCgamma2 | Pre-B I            | 1.593E-06                          | 6.882E-04                                    | 1.707E-09                          | 7.373E-07                                    | Up                 | Both                                                    |
| --        | PVO4     | 141-pPLCgamma2 | CD11bmid Monocytes | 2.126E-06                          | 9.184E-04                                    | 3.644E-08                          | 1.574E-05                                    | Up                 | Both                                                    |
| --        | PVO4     | 150-pSTAT5     | CD11bmid Monocytes | 2.224E-06                          | 9.608E-04                                    | 5.946E-06                          | 2.569E-03                                    | Up                 | Both                                                    |
| --        | PVO4     | 141-pPLCgamma2 | Naïve CD4+ T       | 2.626E-06                          | 1.135E-03                                    | 1.490E-07                          | 6.438E-05                                    | Up                 | Both                                                    |
| --        | PVO4     | 164-pSLP-76    | Myelocyte          | 2.648E-06                          | 1.144E-03                                    | 3.499E-11                          | 1.512E-08                                    | Up                 | Both                                                    |
| --        | PVO4     | 169-pP38       | Mature CD4+ T      | 2.784E-06                          | 1.203E-03                                    | 3.612E-05                          | 1.561E-02                                    | Up                 | Both                                                    |
| --        | PVO4     | 175-pCrkL      | CD11bmid Monocytes | 3.069E-06                          | 1.326E-03                                    | 3.864E-06                          | 1.669E-03                                    | Up                 | Both                                                    |
| --        | PVO4     | 174-pSrcFK     | Naïve CD8+ T       | 3.079E-06                          | 1.330E-03                                    | 2.323E-05                          | 1.004E-02                                    | Up                 | Both                                                    |
| --        | PVO4     | 169-pP38       | Pre-B I            | 3.506E-06                          | 1.514E-03                                    | 2.962E-05                          | 1.280E-02                                    | Up                 | Both                                                    |
| --        | PVO4     | 154-pSHP2      | CD11bmid Monocytes | 3.724E-06                          | 1.609E-03                                    | 8.827E-07                          | 3.813E-04                                    | Up                 | Both                                                    |
| --        | PVO4     | 169-pP38       | MEP                | 3.781E-06                          | 1.634E-03                                    | 2.851E-05                          | 1.232E-02                                    | Up                 | Both                                                    |
| --        | PVO4     | 172-pS6        | Naïve CD8+ T       | 3.845E-06                          | 1.661E-03                                    | n.s.                               | n.s.                                         | Up                 | Marrow 1 Only                                           |
| --        | PVO4     | 151-pERK1/2    | CD11b- Monocytes   | 3.854E-06                          | 1.665E-03                                    | 6.794E-05                          | 2.935E-02                                    | Up                 | Both                                                    |
| --        | PVO4     | 169-pP38       | Naïve CD8+ T       | 3.965E-06                          | 1.713E-03                                    | n.s.                               | n.s.                                         | Up                 | Marrow 1 Only                                           |
| --        | PVO4     | 164-pSLP-76    | Pre-B II           | 4.576E-06                          | 1.977E-03                                    | 5.183E-07                          | 2.239E-04                                    | Up                 | Both                                                    |
| --        | PVO4     | 141-pPLCgamma2 | CMP                | 4.956E-06                          | 2.141E-03                                    | 3.623E-09                          | 1.565E-06                                    | Up                 | Both                                                    |
| --        | PVO4     | 174-pSrcFK     | Mature CD4+ T      | 5.492E-06                          | 2.373E-03                                    | 9.698E-06                          | 4.190E-03                                    | Up                 | Both                                                    |
| --        | PVO4     | 151-pERK1/2    | Immature B         | 5.593E-06                          | 2.416E-03                                    | 5.000E-07                          | 2.160E-04                                    | Up                 | Both                                                    |
| --        | PVO4     | 151-pERK1/2    | CD11bmid Monocytes | 5.701E-06                          | 2.463E-03                                    | 4.519E-05                          | 1.952E-02                                    | Up                 | Both                                                    |
| --        | PVO4     | 154-pSHP2      | Pre-B I            | 5.785E-06                          | 2.499E-03                                    | 1.965E-06                          | 8.487E-04                                    | Up                 | Both                                                    |
| --        | PVO4     | 141-pPLCgamma2 | Myelocyte          | 5.867E-06                          | 2.535E-03                                    | 3.794E-11                          | 1.639E-08                                    | Up                 | Both                                                    |
| --        | PVO4     | 150-pSTAT5     | Naïve CD8+ T       | 5.997E-06                          | 2.591E-03                                    | 6.373E-05                          | 2.753E-02                                    | Up                 | Both                                                    |
| --        | PVO4     | 154-pSHP2      | CD11b- Monocytes   | 6.063E-06                          | 2.619E-03                                    | 6.402E-07                          | 2.766E-04                                    | Up                 | Both                                                    |
| --        | PVO4     | 174-pSrcFK     | Immature B         | 6.079E-06                          | 2.626E-03                                    | 1.471E-06                          | 6.354E-04                                    | Up                 | Both                                                    |
| --        | PVO4     | 164-pSLP-76    | CD11bhi Monocytes  | 6.501E-06                          | 2.809E-03                                    | 4.259E-06                          | 1.840E-03                                    | Up                 | Both                                                    |
| --        | PVO4     | 169-pP38       | HSC                | 6.638E-06                          | 2.868E-03                                    | n.s.                               | n.s.                                         | Up                 | Marrow 1 Only                                           |
| --        | PVO4     | 172-pS6        | Mature CD4+ T      | 6.923E-06                          | 2.991E-03                                    | n.s.                               | n.s.                                         | Up                 | Marrow 1 Only                                           |
| --        | PVO4     | 175-pCrkL      | Pre-B I            | 7.929E-06                          | 3.425E-03                                    | n.s.                               | n.s.                                         | Up                 | Marrow 1 Only                                           |
| --        | PVO4     | 159-pSTAT3     | CD11b- Monocytes   | 7.989E-06                          | 3.451E-03                                    | 5.035E-06                          | 2.175E-03                                    | Up                 | Both                                                    |
| --        | PVO4     | 169-pP38       | CMP                | 8.134E-06                          | 3.514E-03                                    | 1.469E-05                          | 6.345E-03                                    | Up                 | Both                                                    |
| --        | PVO4     | 176-pCREB      | Pre-B I            | 8.312E-06                          | 3.591E-03                                    | 7.987E-06                          | 3.450E-03                                    | Up                 | Both                                                    |
| --        | PVO4     | 174-pSrcFK     | Naïve CD4+ T       | 8.596E-06                          | 3.714E-03                                    | 9.634E-06                          | 4.162E-03                                    | Up                 | Both                                                    |
| --        | PVO4     | 156-pZAP70/Syk | Naïve CD8+ T       | 8.794E-06                          | 3.799E-03                                    | 4.722E-06                          | 2.040E-03                                    | Up                 | Both                                                    |
| --        | PVO4     | 175-pCrkL      | Naïve CD8+ T       | 9.261E-06                          | 4.001E-03                                    | 1.443E-05                          | 6.232E-03                                    | Up                 | Both                                                    |
| --        | PVO4     | 150-pSTAT5     | CD11b- Monocytes   | 1.108E-05                          | 4.785E-03                                    | 9.093E-06                          | 3.928E-03                                    | Up                 | Both                                                    |
| --        | PVO4     | 175-pCrkL      | Pre-B II           | 1.267E-05                          | 5.473E-03                                    | n.s.                               | n.s.                                         | Up                 | Marrow 1 Only                                           |
| --        | PVO4     | 176-pCREB      | HSC                | 1.457E-05                          | 6.296E-03                                    | 1.252E-05                          | 5.410E-03                                    | Up                 | Both                                                    |
| --        | PVO4     | 175-pCrkL      | CD11b- Monocytes   | 1.562E-05                          | 6.749E-03                                    | 1.084E-05                          | 4.685E-03                                    | Up                 | Both                                                    |
| --        | PVO4     | 141-pPLCgamma2 | MPP                | 1.757E-05                          | 7.590E-03                                    | 3.354E-08                          | 1.449E-05                                    | Up                 | Both                                                    |
| --        | PVO4     | 169-pP38       | MPP                | 1.773E-05                          | 7.660E-03                                    | 5.082E-05                          | 2.195E-02                                    | Up                 | Both                                                    |
| --        | PVO4     | 141-pPLCgamma2 | MEP                | 1.868E-05                          | 8.068E-03                                    | 3.541E-09                          | 1.530E-06                                    | Up                 | Both                                                    |
| --        | PVO4     | 154-pSHP2      | Naïve CD8+ T       | 1.934E-05                          | 8.355E-03                                    | 4.097E-06                          | 1.770E-03                                    | Up                 | Both                                                    |
| --        | PVO4     | 176-pCREB      | Naïve CD8+ T       | 1.996E-05                          | 8.621E-03                                    | 3.574E-05                          | 1.544E-02                                    | Up                 | Both                                                    |
| --        | PVO4     | 169-pP38       | Naïve CD4+ T       | 2.016E-05                          | 8.708E-03                                    | n.s.                               | n.s.                                         | Up                 | Marrow 1 Only                                           |
| --        | PVO4     | 159-pSTAT3     | CD11bhi Monocytes  | 2.021E-05                          | 8.730E-03                                    | 1.112E-06                          | 4.805E-04                                    | Up                 | Both                                                    |
| --        | PVO4     | 176-pCREB      | Plasmacytoid DC    | 2.024E-05                          | 8.742E-03                                    | n.s.                               | n.s.                                         | Up                 | Marrow 1 Only                                           |
| --        | PVO4     | 171-pBtk/Itk   | Mature CD38lo B    | 2.064E-05                          | 8.918E-03                                    | n.s.                               | n.s.                                         | Down               | Marrow 1 Only                                           |
| --        | PVO4     | 169-pP38       | Pre-B II           | 2.081E-05                          | 8.988E-03                                    | n.s.                               | n.s.                                         | Up                 | Marrow 1 Only                                           |
| --        | PVO4     | 169-pP38       | NK                 | 2.109E-05                          | 9.113E-03                                    | n.s.                               | n.s.                                         | Up                 | Marrow 1 Only                                           |
| --        | PVO4     | 174-pSrcFK     | Mature CD8+ T      | 2.116E-05                          | 9.139E-03                                    | 3.883E-05                          | 1.677E-02                                    | Up                 | Both                                                    |
| --        | PVO4     | 141-pPLCgamma2 | Erythroblast       | 2.192E-05                          | 9.471E-03                                    | 6.549E-08                          | 2.829E-05                                    | Up                 | Both                                                    |
| --        | PVO4     | 175-pCrkL      | Mature CD4+ T      | 2.211E-05                          | 9.551E-03                                    | 8.297E-05                          | 3.584E-02                                    | Up                 | Both                                                    |
| --        | PVO4     | 164-pSLP-76    | Plasmacytoid DC    | 2.231E-05                          | 9.639E-03                                    | 1.796E-05                          | 7.758E-03                                    | Up                 | Both                                                    |
| --        | PVO4     | 175-pCrkL      | CD11bhi Monocytes  | 2.342E-05                          | 1.012E-02                                    | 2.612E-05                          | 1.128E-02                                    | Up                 | Both                                                    |
| --        | PVO4     | 154-pSHP2      | Plasma cell        | 2.370E-05                          | 1.024E-02                                    | n.s.                               | n.s.                                         | Up                 | Marrow 1 Only                                           |
| --        | PVO4     | 156-pZAP70/Syk | Mature CD4+ T      | 2.406E-05                          | 1.039E-02                                    | 1.852E-08                          | 7.999E-06                                    | Up                 | Both                                                    |
| --        | PVO4     | 175-pCrkL      | Mature CD8+ T      | 2.499E-05                          | 1.080E-02                                    | n.s.                               | n.s.                                         | Up                 | Marrow 1 Only                                           |
| --        | PVO4     | 159-pSTAT3     | Plasma cell        | 2.513E-05                          | 1.085E-02                                    | n.s.                               | n.s.                                         | Up                 | Marrow 1 Only                                           |



| Inhibitor | Stimulus | Antibody       | Population         | Marrow 1 unadjusted t-test P value | Marrow 1 Bonferroni-corrected t-test P value | Marrow 2 unadjusted t-test P value | Marrow 2 Bonferroni-corrected t-test P value | Direction of Shift | Dataset(s) with significant shift (Bonferroni P < 0.05) |
|-----------|----------|----------------|--------------------|------------------------------------|----------------------------------------------|------------------------------------|----------------------------------------------|--------------------|---------------------------------------------------------|
| --        | PVO4     | 172-pS6        | Pre-B I            | 2.653E-05                          | 1.146E-02                                    | n.s.                               | n.s.                                         | Up                 | Marrow 1 Only                                           |
| --        | PVO4     | 141-pPLCGamma2 | CD11bhi Monocytes  | 2.674E-05                          | 1.155E-02                                    | 4.535E-06                          | 1.959E-03                                    | Up                 | Both                                                    |
| --        | PVO4     | 156-pZAP70/Syk | Mature CD8+ T      | 2.768E-05                          | 1.196E-02                                    | 2.241E-07                          | 9.681E-05                                    | Up                 | Both                                                    |
| --        | PVO4     | 159-pSTAT3     | Pre-B II           | 2.779E-05                          | 1.200E-02                                    | n.s.                               | n.s.                                         | Up                 | Marrow 1 Only                                           |
| --        | PVO4     | 150-pSTAT5     | Mature CD8+ T      | 2.813E-05                          | 1.215E-02                                    | n.s.                               | n.s.                                         | Up                 | Marrow 1 Only                                           |
| --        | PVO4     | 156-pZAP70/Syk | Immature B         | 2.901E-05                          | 1.253E-02                                    | 4.693E-09                          | 2.027E-06                                    | Up                 | Both                                                    |
| --        | PVO4     | 171-pBtk/Itk   | HSC                | 2.945E-05                          | 1.272E-02                                    | n.s.                               | n.s.                                         | Down               | Marrow 1 Only                                           |
| --        | PVO4     | 156-pZAP70/Syk | Naïve CD4+ T       | 3.021E-05                          | 1.305E-02                                    | 4.420E-08                          | 1.910E-05                                    | Up                 | Both                                                    |
| --        | PVO4     | 150-pSTAT5     | Naïve CD4+ T       | 3.102E-05                          | 1.340E-02                                    | n.s.                               | n.s.                                         | Up                 | Marrow 1 Only                                           |
| --        | PVO4     | 175-pCrkL      | Naïve CD4+ T       | 3.124E-05                          | 1.350E-02                                    | 1.132E-04                          | 4.888E-02                                    | Up                 | Both                                                    |
| --        | PVO4     | 172-pS6        | Naïve CD4+ T       | 3.247E-05                          | 1.403E-02                                    | n.s.                               | n.s.                                         | Up                 | Marrow 1 Only                                           |
| --        | PVO4     | 164-pSLP-76    | HSC                | 3.349E-05                          | 1.447E-02                                    | n.s.                               | n.s.                                         | Up                 | Marrow 1 Only                                           |
| --        | PVO4     | 174-pSrcFK     | Mature CD38lo B    | 3.412E-05                          | 1.474E-02                                    | n.s.                               | n.s.                                         | Up                 | Marrow 1 Only                                           |
| --        | PVO4     | 153-pMAPKAPK2  | Plasma cell        | 3.441E-05                          | 1.487E-02                                    | n.s.                               | n.s.                                         | Up                 | Marrow 1 Only                                           |
| --        | PVO4     | 169-pP38       | Plasma cell        | 3.453E-05                          | 1.492E-02                                    | 9.889E-05                          | 4.272E-02                                    | Up                 | Both                                                    |
| --        | PVO4     | 141-pPLCGamma2 | Pre-B II           | 3.560E-05                          | 1.538E-02                                    | 4.256E-06                          | 1.839E-03                                    | Up                 | Both                                                    |
| --        | PVO4     | 150-pSTAT5     | Plasmacytoid DC    | 3.620E-05                          | 1.564E-02                                    | n.s.                               | n.s.                                         | Up                 | Marrow 1 Only                                           |
| --        | PVO4     | 174-pSrcFK     | Plasmacytoid DC    | 3.679E-05                          | 1.589E-02                                    | n.s.                               | n.s.                                         | Up                 | Marrow 1 Only                                           |
| --        | PVO4     | 141-pPLCGamma2 | GMP                | 3.927E-05                          | 1.696E-02                                    | 3.727E-05                          | 1.610E-02                                    | Up                 | Both                                                    |
| --        | PVO4     | 154-pSHP2      | Mature CD4+ T      | 4.046E-05                          | 1.748E-02                                    | 5.866E-08                          | 2.534E-05                                    | Up                 | Both                                                    |
| --        | PVO4     | 150-pSTAT5     | Mature CD4+ T      | 4.223E-05                          | 1.825E-02                                    | 5.675E-05                          | 2.452E-02                                    | Up                 | Both                                                    |
| --        | PVO4     | 154-pSHP2      | CD11bhi Monocytes  | 4.244E-05                          | 1.833E-02                                    | 1.681E-05                          | 7.264E-03                                    | Up                 | Both                                                    |
| --        | PVO4     | 156-pZAP70/Syk | CD11bmid Monocytes | 4.343E-05                          | 1.876E-02                                    | 2.121E-06                          | 9.162E-04                                    | Up                 | Both                                                    |
| --        | PVO4     | 164-pSLP-76    | Mature CD38mid B   | 4.507E-05                          | 1.947E-02                                    | 8.637E-05                          | 3.731E-02                                    | Up                 | Both                                                    |
| --        | PVO4     | 154-pSHP2      | Mature CD8+ T      | 4.776E-05                          | 2.063E-02                                    | 1.561E-07                          | 6.746E-05                                    | Up                 | Both                                                    |
| --        | PVO4     | 153-pMAPKAPK2  | Mature CD8+ T      | 4.877E-05                          | 2.107E-02                                    | 5.477E-06                          | 2.366E-03                                    | Up                 | Both                                                    |
| --        | PVO4     | 169-pP38       | Plasmacytoid DC    | 4.928E-05                          | 2.129E-02                                    | n.s.                               | n.s.                                         | Up                 | Marrow 1 Only                                           |
| --        | PVO4     | 151-pERK1/2    | MEP                | 5.179E-05                          | 2.237E-02                                    | 2.203E-06                          | 9.518E-04                                    | Up                 | Both                                                    |
| --        | PVO4     | 166-IkBalpa    | MEP                | 5.197E-05                          | 2.245E-02                                    | n.s.                               | n.s.                                         | Up                 | Marrow 1 Only                                           |
| --        | PVO4     | 164-pSLP-76    | MPP                | 5.364E-05                          | 2.317E-02                                    | n.s.                               | n.s.                                         | Up                 | Marrow 1 Only                                           |
| --        | PVO4     | 150-pSTAT5     | Pre-B I            | 5.516E-05                          | 2.383E-02                                    | 1.031E-04                          | 4.453E-02                                    | Up                 | Both                                                    |
| --        | PVO4     | 174-pSrcFK     | Plasma cell        | 5.613E-05                          | 2.425E-02                                    | 9.429E-06                          | 4.073E-03                                    | Up                 | Both                                                    |
| --        | PVO4     | 176-pCREB      | MEP                | 6.198E-05                          | 2.678E-02                                    | 2.175E-05                          | 9.398E-03                                    | Up                 | Both                                                    |
| --        | PVO4     | 154-pSHP2      | Naïve CD4+ T       | 6.228E-05                          | 2.690E-02                                    | 2.723E-06                          | 1.176E-03                                    | Up                 | Both                                                    |
| --        | PVO4     | 166-IkBalpa    | CD11bmid Monocytes | 6.554E-05                          | 2.832E-02                                    | n.s.                               | n.s.                                         | Down               | Marrow 1 Only                                           |
| --        | PVO4     | 174-pSrcFK     | Pre-B I            | 6.555E-05                          | 2.832E-02                                    | n.s.                               | n.s.                                         | Up                 | Marrow 1 Only                                           |
| --        | PVO4     | 141-pPLCGamma2 | HSC                | 6.600E-05                          | 2.851E-02                                    | 2.550E-07                          | 1.102E-04                                    | Up                 | Both                                                    |
| --        | PVO4     | 159-pSTAT3     | Mature CD4+ T      | 6.885E-05                          | 2.974E-02                                    | n.s.                               | n.s.                                         | Up                 | Marrow 1 Only                                           |
| --        | PVO4     | 172-pS6        | MEP                | 7.401E-05                          | 3.197E-02                                    | n.s.                               | n.s.                                         | Up                 | Marrow 1 Only                                           |
| --        | PVO4     | 159-pSTAT3     | HSC                | 7.720E-05                          | 3.335E-02                                    | n.s.                               | n.s.                                         | Up                 | Marrow 1 Only                                           |
| --        | PVO4     | 151-pERK1/2    | Pre-B I            | 7.891E-05                          | 3.409E-02                                    | 1.067E-04                          | 4.608E-02                                    | Up                 | Both                                                    |
| --        | PVO4     | 153-pMAPKAPK2  | Naïve CD8+ T       | 8.111E-05                          | 3.504E-02                                    | 2.373E-05                          | 1.025E-02                                    | Up                 | Both                                                    |
| --        | PVO4     | 150-pSTAT5     | Immature B         | 8.145E-05                          | 3.518E-02                                    | 2.738E-06                          | 1.183E-03                                    | Up                 | Both                                                    |
| --        | PVO4     | 159-pSTAT3     | Naïve CD8+ T       | 8.153E-05                          | 3.522E-02                                    | n.s.                               | n.s.                                         | Up                 | Marrow 1 Only                                           |
| --        | PVO4     | 153-pMAPKAPK2  | Mature CD4+ T      | 8.308E-05                          | 3.589E-02                                    | 5.376E-06                          | 2.322E-03                                    | Up                 | Both                                                    |
| --        | PVO4     | 151-pERK1/2    | Myelocyte          | 8.862E-05                          | 3.828E-02                                    | 2.720E-06                          | 1.175E-03                                    | Up                 | Both                                                    |
| --        | PVO4     | 141-pPLCGamma2 | Mature CD38mid B   | 9.589E-05                          | 4.143E-02                                    | 9.466E-05                          | 4.089E-02                                    | Up                 | Both                                                    |
| --        | PVO4     | 150-pSTAT5     | CD11bhi Monocytes  | 9.815E-05                          | 4.240E-02                                    | n.s.                               | n.s.                                         | Up                 | Marrow 1 Only                                           |
| --        | PVO4     | 141-pPLCGamma2 | Megakaryocyte      | 9.998E-05                          | 4.319E-02                                    | 2.289E-07                          | 9.889E-05                                    | Up                 | Both                                                    |
| --        | PVO4     | 172-pS6        | HSC                | 1.039E-04                          | 4.488E-02                                    | n.s.                               | n.s.                                         | Up                 | Marrow 1 Only                                           |
| --        | PVO4     | 154-pSHP2      | MEP                | 1.054E-04                          | 4.554E-02                                    | n.s.                               | n.s.                                         | Up                 | Marrow 1 Only                                           |
| --        | PVO4     | 153-pMAPKAPK2  | Immature B         | 1.065E-04                          | 4.601E-02                                    | 3.284E-07                          | 1.419E-04                                    | Up                 | Both                                                    |
| --        | PVO4     | 176-pCREB      | MPP                | 1.079E-04                          | 4.660E-02                                    | 2.947E-06                          | 1.273E-03                                    | Up                 | Both                                                    |
| --        | PVO4     | 176-pCREB      | Plasma cell        | 1.080E-04                          | 4.667E-02                                    | n.s.                               | n.s.                                         | Up                 | Marrow 1 Only                                           |
| --        | PVO4     | 165-pNFkB      | Pre-B I            | 1.086E-04                          | 4.691E-02                                    | n.s.                               | n.s.                                         | Up                 | Marrow 1 Only                                           |
| --        | PVO4     | 169-pP38       | GMP                | 1.141E-04                          | 4.928E-02                                    | n.s.                               | n.s.                                         | Up                 | Marrow 1 Only                                           |
| --        | PVO4     | 156-pZAP70/Syk | Myelocyte          | n.s.                               | n.s.                                         | 9.371E-09                          | 4.048E-06                                    | Up                 | Marrow 2 Only                                           |
| --        | PVO4     | 151-pERK1/2    | Mature CD4+ T      | n.s.                               | n.s.                                         | 1.292E-07                          | 5.582E-05                                    | Up                 | Marrow 2 Only                                           |
| --        | PVO4     | 169-pP38       | Myelocyte          | n.s.                               | n.s.                                         | 1.349E-07                          | 5.828E-05                                    | Up                 | Marrow 2 Only                                           |
| --        | PVO4     | 156-pZAP70/Syk | CD11b- Monocytes   | n.s.                               | n.s.                                         | 1.823E-07                          | 7.876E-05                                    | Up                 | Marrow 2 Only                                           |
| --        | PVO4     | 156-pZAP70/Syk | Pre-B I            | n.s.                               | n.s.                                         | 1.912E-07                          | 8.260E-05                                    | Up                 | Marrow 2 Only                                           |
| --        | PVO4     | 141-pPLCGamma2 | Plasmacytoid DC    | n.s.                               | n.s.                                         | 2.106E-07                          | 9.098E-05                                    | Up                 | Marrow 2 Only                                           |
| --        | PVO4     | 169-pP38       | Erythroblast       | n.s.                               | n.s.                                         | 3.660E-07                          | 1.581E-04                                    | Up                 | Marrow 2 Only                                           |
| --        | PVO4     | 141-pPLCGamma2 | NK                 | n.s.                               | n.s.                                         | 4.657E-07                          | 2.012E-04                                    | Up                 | Marrow 2 Only                                           |
| --        | PVO4     | 168-pH3        | Immature B         | n.s.                               | n.s.                                         | 5.145E-07                          | 2.223E-04                                    | Up                 | Marrow 2 Only                                           |
| --        | PVO4     | 154-pSHP2      | Myelocyte          | n.s.                               | n.s.                                         | 7.221E-07                          | 3.119E-04                                    | Up                 | Marrow 2 Only                                           |
| --        | PVO4     | 151-pERK1/2    | Naïve CD4+ T       | n.s.                               | n.s.                                         | 1.243E-06                          | 5.371E-04                                    | Up                 | Marrow 2 Only                                           |
| --        | PVO4     | 164-pSLP-76    | Erythroblast       | n.s.                               | n.s.                                         | 1.333E-06                          | 5.761E-04                                    | Up                 | Marrow 2 Only                                           |

| Inhibitor | Stimulus | Antibody       | Population         | Marrow 1 unadjusted t-test P value | Marrow 1 Bonferroni-corrected t-test P value | Marrow 2 unadjusted t-test P value | Marrow 2 Bonferroni-corrected t-test P value | Direction of Shift | Dataset(s) with significant shift (Bonferroni P < 0.05) |
|-----------|----------|----------------|--------------------|------------------------------------|----------------------------------------------|------------------------------------|----------------------------------------------|--------------------|---------------------------------------------------------|
| --        | PVO4     | 174-pSrcFK     | Myelocyte          | n.s.                               | n.s.                                         | 1.638E-06                          | 7.075E-04                                    | Up                 | Marrow 2 Only                                           |
| --        | PVO4     | 176-pCREB      | CMP                | n.s.                               | n.s.                                         | 2.078E-06                          | 8.975E-04                                    | Up                 | Marrow 2 Only                                           |
| --        | PVO4     | 159-pSTAT3     | Myelocyte          | n.s.                               | n.s.                                         | 2.139E-06                          | 9.243E-04                                    | Up                 | Marrow 2 Only                                           |
| --        | PVO4     | 151-pERK1/2    | Naïve CD8+ T       | n.s.                               | n.s.                                         | 2.996E-06                          | 1.294E-03                                    | Up                 | Marrow 2 Only                                           |
| --        | PVO4     | 152-Ki67       | Plasma cell        | n.s.                               | n.s.                                         | 3.190E-06                          | 1.378E-03                                    | Up                 | Marrow 2 Only                                           |
| --        | PVO4     | 154-pSHP2      | Erythroblast       | n.s.                               | n.s.                                         | 3.243E-06                          | 1.401E-03                                    | Up                 | Marrow 2 Only                                           |
| --        | PVO4     | 164-pSLP-76    | NK                 | n.s.                               | n.s.                                         | 3.592E-06                          | 1.552E-03                                    | Up                 | Marrow 2 Only                                           |
| --        | PVO4     | 151-pERK1/2    | CMP                | n.s.                               | n.s.                                         | 6.707E-06                          | 2.897E-03                                    | Up                 | Marrow 2 Only                                           |
| --        | PVO4     | 153-pMAPKAPK2  | MEP                | n.s.                               | n.s.                                         | 6.890E-06                          | 2.976E-03                                    | Up                 | Marrow 2 Only                                           |
| --        | PVO4     | 164-pSLP-76    | Mature CD38lo B    | n.s.                               | n.s.                                         | 7.085E-06                          | 3.061E-03                                    | Up                 | Marrow 2 Only                                           |
| --        | PVO4     | 152-Ki67       | Immature B         | n.s.                               | n.s.                                         | 7.122E-06                          | 3.077E-03                                    | Up                 | Marrow 2 Only                                           |
| --        | PVO4     | 175-pCrkL      | Myelocyte          | n.s.                               | n.s.                                         | 7.455E-06                          | 3.220E-03                                    | Up                 | Marrow 2 Only                                           |
| --        | PVO4     | 153-pMAPKAPK2  | GMP                | n.s.                               | n.s.                                         | 7.990E-06                          | 3.452E-03                                    | Up                 | Marrow 2 Only                                           |
| --        | PVO4     | 153-pMAPKAPK2  | CD11bmid Monocytes | n.s.                               | n.s.                                         | 8.616E-06                          | 3.722E-03                                    | Up                 | Marrow 2 Only                                           |
| --        | PVO4     | 168-pH3        | Myelocyte          | n.s.                               | n.s.                                         | 9.856E-06                          | 4.258E-03                                    | Up                 | Marrow 2 Only                                           |
| --        | PVO4     | 154-pSHP2      | CMP                | n.s.                               | n.s.                                         | 9.963E-06                          | 4.304E-03                                    | Up                 | Marrow 2 Only                                           |
| --        | PVO4     | 153-pMAPKAPK2  | Pre-B I            | n.s.                               | n.s.                                         | 1.076E-05                          | 4.648E-03                                    | Up                 | Marrow 2 Only                                           |
| --        | PVO4     | 164-pSLP-76    | Megakaryocyte      | n.s.                               | n.s.                                         | 1.212E-05                          | 5.234E-03                                    | Up                 | Marrow 2 Only                                           |
| --        | PVO4     | 176-pCREB      | Mature CD4+ T      | n.s.                               | n.s.                                         | 1.358E-05                          | 5.868E-03                                    | Up                 | Marrow 2 Only                                           |
| --        | PVO4     | 156-pZAP70/Syk | MPP                | n.s.                               | n.s.                                         | 1.512E-05                          | 6.531E-03                                    | Up                 | Marrow 2 Only                                           |
| --        | PVO4     | 176-pCREB      | Immature B         | n.s.                               | n.s.                                         | 1.615E-05                          | 6.975E-03                                    | Up                 | Marrow 2 Only                                           |
| --        | PVO4     | 153-pMAPKAPK2  | Plasmacytoid DC    | n.s.                               | n.s.                                         | 1.617E-05                          | 6.987E-03                                    | Up                 | Marrow 2 Only                                           |
| --        | PVO4     | 153-pMAPKAPK2  | CD11b- Monocytes   | n.s.                               | n.s.                                         | 1.774E-05                          | 7.663E-03                                    | Up                 | Marrow 2 Only                                           |
| --        | PVO4     | 156-pZAP70/Syk | CD11bhi Monocytes  | n.s.                               | n.s.                                         | 1.850E-05                          | 7.991E-03                                    | Up                 | Marrow 2 Only                                           |
| --        | PVO4     | 169-pP38       | Immature B         | n.s.                               | n.s.                                         | 1.995E-05                          | 8.619E-03                                    | Up                 | Marrow 2 Only                                           |
| --        | PVO4     | 156-pZAP70/Syk | Pre-B II           | n.s.                               | n.s.                                         | 2.167E-05                          | 9.360E-03                                    | Up                 | Marrow 2 Only                                           |
| --        | PVO4     | 151-pERK1/2    | Pre-B II           | n.s.                               | n.s.                                         | 2.442E-05                          | 1.055E-02                                    | Up                 | Marrow 2 Only                                           |
| --        | PVO4     | 153-pMAPKAPK2  | CD11bhi Monocytes  | n.s.                               | n.s.                                         | 2.471E-05                          | 1.068E-02                                    | Up                 | Marrow 2 Only                                           |
| --        | PVO4     | 156-pZAP70/Syk | Mature CD38lo B    | n.s.                               | n.s.                                         | 2.546E-05                          | 1.100E-02                                    | Up                 | Marrow 2 Only                                           |
| --        | PVO4     | 164-pSLP-76    | Platelet           | n.s.                               | n.s.                                         | 2.567E-05                          | 1.109E-02                                    | Up                 | Marrow 2 Only                                           |
| --        | PVO4     | 151-pERK1/2    | Mature CD8+ T      | n.s.                               | n.s.                                         | 3.121E-05                          | 1.348E-02                                    | Up                 | Marrow 2 Only                                           |
| --        | PVO4     | 153-pMAPKAPK2  | Myelocyte          | n.s.                               | n.s.                                         | 3.176E-05                          | 1.372E-02                                    | Up                 | Marrow 2 Only                                           |
| --        | PVO4     | 151-pERK1/2    | Mature CD38lo B    | n.s.                               | n.s.                                         | 3.225E-05                          | 1.393E-02                                    | Up                 | Marrow 2 Only                                           |
| --        | PVO4     | 150-pSTAT5     | Myelocyte          | n.s.                               | n.s.                                         | 3.723E-05                          | 1.608E-02                                    | Up                 | Marrow 2 Only                                           |
| --        | PVO4     | 156-pZAP70/Syk | MEP                | n.s.                               | n.s.                                         | 3.940E-05                          | 1.702E-02                                    | Up                 | Marrow 2 Only                                           |
| --        | PVO4     | 168-pH3        | HSC                | n.s.                               | n.s.                                         | 4.137E-05                          | 1.787E-02                                    | Up                 | Marrow 2 Only                                           |
| --        | PVO4     | 156-pZAP70/Syk | Plasma cell        | n.s.                               | n.s.                                         | 4.201E-05                          | 1.815E-02                                    | Up                 | Marrow 2 Only                                           |
| --        | PVO4     | 168-pH3        | MPP                | n.s.                               | n.s.                                         | 4.804E-05                          | 2.076E-02                                    | Up                 | Marrow 2 Only                                           |
| --        | PVO4     | 141-pPLCgamma2 | Mature CD38lo B    | n.s.                               | n.s.                                         | 6.473E-05                          | 2.796E-02                                    | Up                 | Marrow 2 Only                                           |
| --        | PVO4     | 153-pMAPKAPK2  | Naïve CD4+ T       | n.s.                               | n.s.                                         | 6.518E-05                          | 2.816E-02                                    | Up                 | Marrow 2 Only                                           |
| --        | PVO4     | 164-pSLP-76    | CMP                | n.s.                               | n.s.                                         | 7.209E-05                          | 3.114E-02                                    | Up                 | Marrow 2 Only                                           |
| --        | PVO4     | 168-pH3        | Plasmacytoid DC    | n.s.                               | n.s.                                         | 7.243E-05                          | 3.129E-02                                    | Up                 | Marrow 2 Only                                           |
| --        | PVO4     | 169-pP38       | Platelet           | n.s.                               | n.s.                                         | 7.901E-05                          | 3.413E-02                                    | Up                 | Marrow 2 Only                                           |
| --        | PVO4     | 154-pSHP2      | Pre-B II           | n.s.                               | n.s.                                         | 8.312E-05                          | 3.591E-02                                    | Up                 | Marrow 2 Only                                           |
| --        | PVO4     | 176-pCREB      | Mature CD8+ T      | n.s.                               | n.s.                                         | 8.805E-05                          | 3.804E-02                                    | Up                 | Marrow 2 Only                                           |
| --        | PVO4     | 166-IkBalph    | Immature B         | n.s.                               | n.s.                                         | 8.950E-05                          | 3.866E-02                                    | Up                 | Marrow 2 Only                                           |
| --        | PVO4     | 153-pMAPKAPK2  | Pre-B II           | n.s.                               | n.s.                                         | 9.050E-05                          | 3.910E-02                                    | Up                 | Marrow 2 Only                                           |
| --        | PVO4     | 156-pZAP70/Syk | CMP                | n.s.                               | n.s.                                         | 9.233E-05                          | 3.989E-02                                    | Up                 | Marrow 2 Only                                           |
| --        | PVO4     | 153-pMAPKAPK2  | MPP                | n.s.                               | n.s.                                         | 9.519E-05                          | 4.112E-02                                    | Up                 | Marrow 2 Only                                           |
| --        | PVO4     | 156-pZAP70/Syk | Mature CD38mid B   | n.s.                               | n.s.                                         | 9.588E-05                          | 4.142E-02                                    | Up                 | Marrow 2 Only                                           |
| --        | PVO4     | 172-pS6        | Plasma cell        | n.s.                               | n.s.                                         | 1.065E-04                          | 4.602E-02                                    | Up                 | Marrow 2 Only                                           |
| --        | PVO4     | 164-pSLP-76    | GMP                | n.s.                               | n.s.                                         | 1.111E-04                          | 4.798E-02                                    | Up                 | Marrow 2 Only                                           |
| --        | SCF      | 159-pSTAT3     | CD11bmid Monocytes | 3.809E-06                          | 1.646E-03                                    | 7.218E-06                          | 3.118E-03                                    | Up                 | Both                                                    |
| --        | SCF      | 159-pSTAT3     | HSC                | 4.904E-06                          | 2.119E-03                                    | n.s.                               | n.s.                                         | Up                 | Marrow 1 Only                                           |
| --        | SCF      | 159-pSTAT3     | CD11bhi Monocytes  | 5.638E-06                          | 2.435E-03                                    | 1.816E-07                          | 7.846E-05                                    | Up                 | Both                                                    |
| --        | SCF      | 159-pSTAT3     | CD11b- Monocytes   | 5.831E-06                          | 2.519E-03                                    | 1.222E-05                          | 5.279E-03                                    | Up                 | Both                                                    |
| --        | SCF      | 159-pSTAT3     | Plasma cell        | 8.590E-06                          | 3.711E-03                                    | n.s.                               | n.s.                                         | Up                 | Marrow 1 Only                                           |
| --        | SCF      | 159-pSTAT3     | Mature CD4+ T      | 8.635E-06                          | 3.730E-03                                    | n.s.                               | n.s.                                         | Up                 | Marrow 1 Only                                           |
| --        | SCF      | 159-pSTAT3     | NK                 | 1.148E-05                          | 4.960E-03                                    | n.s.                               | n.s.                                         | Up                 | Marrow 1 Only                                           |
| --        | SCF      | 172-pS6        | MEP                | 1.230E-05                          | 5.314E-03                                    | n.s.                               | n.s.                                         | Up                 | Marrow 1 Only                                           |
| --        | SCF      | 159-pSTAT3     | Naïve CD4+ T       | 1.791E-05                          | 7.739E-03                                    | 2.592E-05                          | 1.120E-02                                    | Up                 | Both                                                    |
| --        | SCF      | 159-pSTAT3     | Naïve CD8+ T       | 2.172E-05                          | 9.382E-03                                    | n.s.                               | n.s.                                         | Up                 | Marrow 1 Only                                           |
| --        | SCF      | 174-pSrcFK     | Pre-B II           | 2.211E-05                          | 9.551E-03                                    | n.s.                               | n.s.                                         | Up                 | Marrow 1 Only                                           |
| --        | SCF      | 172-pS6        | HSC                | 2.761E-05                          | 1.193E-02                                    | n.s.                               | n.s.                                         | Up                 | Marrow 1 Only                                           |
| --        | SCF      | 159-pSTAT3     | Mature CD8+ T      | 2.927E-05                          | 1.264E-02                                    | n.s.                               | n.s.                                         | Up                 | Marrow 1 Only                                           |
| --        | SCF      | 171-pBtk/Itk   | HSC                | 3.401E-05                          | 1.469E-02                                    | n.s.                               | n.s.                                         | Up                 | Marrow 1 Only                                           |
| --        | SCF      | 174-pSrcFK     | CD11bhi Monocytes  | 3.703E-05                          | 1.599E-02                                    | n.s.                               | n.s.                                         | Up                 | Marrow 1 Only                                           |
| --        | SCF      | 176-pCREB      | MEP                | 4.010E-05                          | 1.732E-02                                    | n.s.                               | n.s.                                         | Up                 | Marrow 1 Only                                           |

| Inhibitor | Stimulus | Antibody     | Population         | Marrow 1 unadjusted t-test P value | Marrow 1 Bonferroni-corrected t-test P value | Marrow 2 unadjusted t-test P value | Marrow 2 Bonferroni-corrected t-test P value | Direction of Shift | Dataset(s) with significant shift (Bonferroni P < 0.05) |
|-----------|----------|--------------|--------------------|------------------------------------|----------------------------------------------|------------------------------------|----------------------------------------------|--------------------|---------------------------------------------------------|
| --        | SCF      | 159-pSTAT3   | Immature B         | 4.362E-05                          | 1.884E-02                                    | n.s.                               | n.s.                                         | Up                 | Marrow 1 Only                                           |
| --        | SCF      | 169-pP38     | CD11bmid Monocytes | 4.581E-05                          | 1.979E-02                                    | n.s.                               | n.s.                                         | Down               | Marrow 1 Only                                           |
| --        | SCF      | 174-pSrcFK   | CD11b- Monocytes   | 5.155E-05                          | 2.227E-02                                    | n.s.                               | n.s.                                         | Up                 | Marrow 1 Only                                           |
| --        | SCF      | 171-pBtk/Itk | Mature CD38lo B    | 5.362E-05                          | 2.316E-02                                    | n.s.                               | n.s.                                         | Up                 | Marrow 1 Only                                           |
| --        | SCF      | 174-pSrcFK   | CD11bmid Monocytes | 7.256E-05                          | 3.135E-02                                    | n.s.                               | n.s.                                         | Up                 | Marrow 1 Only                                           |
| --        | SCF      | 172-pS6      | Immature B         | 1.102E-04                          | 4.759E-02                                    | n.s.                               | n.s.                                         | Up                 | Marrow 1 Only                                           |
| --        | SCF      | 168-pH3      | HSC                | n.s.                               | n.s.                                         | 1.799E-05                          | 7.771E-03                                    | Up                 | Marrow 2 Only                                           |
| --        | SCF      | 176-pCREB    | MPP                | n.s.                               | n.s.                                         | 3.726E-05                          | 1.610E-02                                    | Up                 | Marrow 2 Only                                           |
| --        | SCF      | 159-pSTAT3   | MPP                | n.s.                               | n.s.                                         | 5.407E-05                          | 2.336E-02                                    | Up                 | Marrow 2 Only                                           |
| --        | SCF      | 176-pCREB    | HSC                | n.s.                               | n.s.                                         | 5.587E-05                          | 2.413E-02                                    | Up                 | Marrow 2 Only                                           |
| --        | TNFa     | 166-IkBalp   | MEP                | 1.780E-07                          | 7.688E-05                                    | n.s.                               | n.s.                                         | Down               | Marrow 1 Only                                           |
| --        | TNFa     | 166-IkBalp   | CD11bhi Monocytes  | 2.835E-07                          | 1.225E-04                                    | n.s.                               | n.s.                                         | Down               | Marrow 1 Only                                           |
| --        | TNFa     | 168-pH3      | CD11b- Monocytes   | 7.874E-07                          | 3.402E-04                                    | 3.278E-05                          | 1.416E-02                                    | Up                 | Both                                                    |
| --        | TNFa     | 166-IkBalp   | CD11bmid Monocytes | 9.950E-07                          | 4.298E-04                                    | 7.287E-05                          | 3.148E-02                                    | Down               | Both                                                    |
| --        | TNFa     | 166-IkBalp   | Plasmacytoid DC    | 3.929E-06                          | 1.697E-03                                    | n.s.                               | n.s.                                         | Down               | Marrow 1 Only                                           |
| --        | TNFa     | 166-IkBalp   | CD11b- Monocytes   | 5.285E-06                          | 2.283E-03                                    | 3.239E-05                          | 1.399E-02                                    | Down               | Both                                                    |
| --        | TNFa     | 166-IkBalp   | GMP                | 5.668E-06                          | 2.449E-03                                    | n.s.                               | n.s.                                         | Down               | Marrow 1 Only                                           |
| --        | TNFa     | 166-IkBalp   | CMP                | 6.233E-06                          | 2.693E-03                                    | n.s.                               | n.s.                                         | Down               | Marrow 1 Only                                           |
| --        | TNFa     | 169-pP38     | CD11bmid Monocytes | 1.064E-05                          | 4.597E-03                                    | n.s.                               | n.s.                                         | Up                 | Marrow 1 Only                                           |
| --        | TNFa     | 176-pCREB    | Plasmacytoid DC    | 1.242E-05                          | 5.367E-03                                    | n.s.                               | n.s.                                         | Up                 | Marrow 1 Only                                           |
| --        | TNFa     | 168-pH3      | Plasmacytoid DC    | 1.846E-05                          | 7.974E-03                                    | 9.493E-06                          | 4.101E-03                                    | Up                 | Both                                                    |
| --        | TNFa     | 176-pCREB    | Naïve CD4+ T       | 1.996E-05                          | 8.622E-03                                    | n.s.                               | n.s.                                         | Up                 | Marrow 1 Only                                           |
| --        | TNFa     | 171-pBtk/Itk | Mature CD38lo B    | 2.033E-05                          | 8.784E-03                                    | n.s.                               | n.s.                                         | Up                 | Marrow 1 Only                                           |
| --        | TNFa     | 172-pS6      | MEP                | 2.385E-05                          | 1.030E-02                                    | n.s.                               | n.s.                                         | Up                 | Marrow 1 Only                                           |
| --        | TNFa     | 172-pS6      | CD11b- Monocytes   | 2.835E-05                          | 1.225E-02                                    | n.s.                               | n.s.                                         | Up                 | Marrow 1 Only                                           |
| --        | TNFa     | 168-pH3      | CD11bmid Monocytes | 3.091E-05                          | 1.335E-02                                    | 7.530E-05                          | 3.253E-02                                    | Up                 | Both                                                    |
| --        | TNFa     | 168-pH3      | CD11bhi Monocytes  | 5.167E-05                          | 2.232E-02                                    | n.s.                               | n.s.                                         | Up                 | Marrow 1 Only                                           |
| --        | TNFa     | 171-pBtk/Itk | HSC                | 5.297E-05                          | 2.288E-02                                    | n.s.                               | n.s.                                         | Up                 | Marrow 1 Only                                           |
| --        | TNFa     | 176-pCREB    | MEP                | 5.567E-05                          | 2.405E-02                                    | n.s.                               | n.s.                                         | Up                 | Marrow 1 Only                                           |
| --        | TNFa     | 166-IkBalp   | NK                 | 5.635E-05                          | 2.434E-02                                    | n.s.                               | n.s.                                         | Down               | Marrow 1 Only                                           |
| --        | TNFa     | 176-pCREB    | Pre-B I            | 5.987E-05                          | 2.587E-02                                    | n.s.                               | n.s.                                         | Up                 | Marrow 1 Only                                           |
| --        | TNFa     | 169-pP38     | CD11bhi Monocytes  | 6.439E-05                          | 2.781E-02                                    | n.s.                               | n.s.                                         | Up                 | Marrow 1 Only                                           |
| --        | TNFa     | 174-pSrcFK   | CD11b- Monocytes   | 6.825E-05                          | 2.948E-02                                    | n.s.                               | n.s.                                         | Up                 | Marrow 1 Only                                           |
| --        | TNFa     | 172-pS6      | HSC                | 6.940E-05                          | 2.998E-02                                    | n.s.                               | n.s.                                         | Up                 | Marrow 1 Only                                           |
| --        | TNFa     | 172-pS6      | CD11bmid Monocytes | 7.044E-05                          | 3.043E-02                                    | n.s.                               | n.s.                                         | Up                 | Marrow 1 Only                                           |
| --        | TNFa     | 166-IkBalp   | Pre-B I            | 7.572E-05                          | 3.271E-02                                    | n.s.                               | n.s.                                         | Down               | Marrow 1 Only                                           |
| --        | TNFa     | 168-pH3      | MEP                | 7.592E-05                          | 3.280E-02                                    | n.s.                               | n.s.                                         | Up                 | Marrow 1 Only                                           |
| --        | TNFa     | 176-pCREB    | HSC                | 8.601E-05                          | 3.716E-02                                    | 4.973E-05                          | 2.148E-02                                    | Up                 | Both                                                    |
| --        | TNFa     | 169-pP38     | CD11b- Monocytes   | 9.802E-05                          | 4.234E-02                                    | n.s.                               | n.s.                                         | Up                 | Marrow 1 Only                                           |
| --        | TNFa     | 171-pBtk/Itk | Mature CD8+ T      | 1.077E-04                          | 4.653E-02                                    | n.s.                               | n.s.                                         | Up                 | Marrow 1 Only                                           |
| --        | TNFa     | 174-pSrcFK   | CD11bhi Monocytes  | 1.127E-04                          | 4.869E-02                                    | n.s.                               | n.s.                                         | Up                 | Marrow 1 Only                                           |
| --        | TNFa     | 169-pP38     | Megakaryocyte      | n.s.                               | n.s.                                         | 5.881E-06                          | 2.541E-03                                    | Up                 | Marrow 2 Only                                           |
| --        | TNFa     | 169-pP38     | Erythroblast       | n.s.                               | n.s.                                         | 6.402E-06                          | 2.766E-03                                    | Up                 | Marrow 2 Only                                           |
| --        | TNFa     | 169-pP38     | Myelocyte          | n.s.                               | n.s.                                         | 9.237E-06                          | 3.990E-03                                    | Up                 | Marrow 2 Only                                           |
| --        | TNFa     | 168-pH3      | HSC                | n.s.                               | n.s.                                         | 1.050E-05                          | 4.537E-03                                    | Up                 | Marrow 2 Only                                           |
| --        | TNFa     | 168-pH3      | Immature B         | n.s.                               | n.s.                                         | 1.987E-05                          | 8.585E-03                                    | Up                 | Marrow 2 Only                                           |
| --        | TNFa     | 176-pCREB    | MPP                | n.s.                               | n.s.                                         | 2.347E-05                          | 1.014E-02                                    | Up                 | Marrow 2 Only                                           |
| --        | TNFa     | 168-pH3      | Myelocyte          | n.s.                               | n.s.                                         | 3.245E-05                          | 1.402E-02                                    | Up                 | Marrow 2 Only                                           |
| --        | TNFa     | 168-pH3      | MPP                | n.s.                               | n.s.                                         | 4.006E-05                          | 1.730E-02                                    | Up                 | Marrow 2 Only                                           |
| --        | TPO      | 150-pSTAT5   | MEP                | 2.251E-05                          | 9.725E-03                                    | n.s.                               | n.s.                                         | Up                 | Marrow 1 Only                                           |
| --        | TPO      | 169-pP38     | CD11bmid Monocytes | 4.194E-05                          | 1.812E-02                                    | n.s.                               | n.s.                                         | Down               | Marrow 1 Only                                           |
| --        | TPO      | 171-pBtk/Itk | HSC                | 6.863E-05                          | 2.965E-02                                    | n.s.                               | n.s.                                         | Up                 | Marrow 1 Only                                           |
| --        | TPO      | 171-pBtk/Itk | Mature CD38lo B    | 8.917E-05                          | 3.852E-02                                    | n.s.                               | n.s.                                         | Up                 | Marrow 1 Only                                           |
| --        | TPO      | 172-pS6      | MEP                | 1.119E-04                          | 4.835E-02                                    | n.s.                               | n.s.                                         | Up                 | Marrow 1 Only                                           |
| --        | TPO      | 152-Ki67     | Plasma cell        | n.s.                               | n.s.                                         | 4.546E-06                          | 1.964E-03                                    | Up                 | Marrow 2 Only                                           |
| --        | TPO      | 150-pSTAT5   | HSC                | n.s.                               | n.s.                                         | 7.666E-06                          | 3.312E-03                                    | Up                 | Marrow 2 Only                                           |
| --        | TPO      | 151-pERK1/2  | HSC                | n.s.                               | n.s.                                         | 4.149E-05                          | 1.793E-02                                    | Up                 | Marrow 2 Only                                           |
| --        | TPO      | 169-pP38     | Erythroblast       | n.s.                               | n.s.                                         | 6.241E-05                          | 2.696E-02                                    | Down               | Marrow 2 Only                                           |
| DMSO      | Unstim   | 166-IkBalp   | Myelocyte          | n.s.                               | n.s.                                         | 3.950E-05                          | 1.707E-02                                    | Up                 | Marrow 2 Only                                           |
| DMSO      | Unstim   | 168-pH3      | Immature B         | n.s.                               | n.s.                                         | 5.184E-05                          | 2.240E-02                                    | Up                 | Marrow 2 Only                                           |
| DMSO      | Unstim   | 164-pSLP-76  | Myelocyte          | n.s.                               | n.s.                                         | 7.644E-05                          | 3.302E-02                                    | Up                 | Marrow 2 Only                                           |
| DMSO      | Unstim   | 152-Ki67     | Plasma cell        | n.s.                               | n.s.                                         | 7.811E-05                          | 3.374E-02                                    | Up                 | Marrow 2 Only                                           |
| Dasatinib | Unstim   | 174-pSrcFK   | CD11bhi Monocytes  | 1.194E-07                          | 5.159E-05                                    | 3.084E-07                          | 1.332E-04                                    | Down               | Both                                                    |
| Dasatinib | Unstim   | 174-pSrcFK   | CD11bmid Monocytes | 1.348E-07                          | 5.821E-05                                    | 1.895E-06                          | 8.185E-04                                    | Down               | Both                                                    |
| Dasatinib | Unstim   | 174-pSrcFK   | CD11b- Monocytes   | 3.320E-07                          | 1.434E-04                                    | 1.752E-05                          | 7.570E-03                                    | Down               | Both                                                    |
| Dasatinib | Unstim   | 174-pSrcFK   | Pre-B II           | 3.968E-07                          | 1.714E-04                                    | 4.139E-05                          | 1.788E-02                                    | Down               | Both                                                    |
| Dasatinib | Unstim   | 168-pH3      | CD11bhi Monocytes  | 7.723E-07                          | 3.336E-04                                    | 8.731E-05                          | 3.772E-02                                    | Down               | Both                                                    |
| Dasatinib | Unstim   | 168-pH3      | CD11bmid Monocytes | 2.508E-06                          | 1.083E-03                                    | 6.421E-05                          | 2.774E-02                                    | Down               | Both                                                    |

| Inhibitor | Stimulus | Antibody       | Population         | Marrow 1 unadjusted t-test P value | Marrow 1 Bonferroni-corrected t-test P value | Marrow 2 unadjusted t-test P value | Marrow 2 Bonferroni-corrected t-test P value | Direction of Shift | Dataset(s) with significant shift (Bonferroni P < 0.05) |
|-----------|----------|----------------|--------------------|------------------------------------|----------------------------------------------|------------------------------------|----------------------------------------------|--------------------|---------------------------------------------------------|
| Dasatinib | Unstim   | 169-pP38       | CD11bmid Monocytes | 2.631E-06                          | 1.136E-03                                    | n.s.                               | n.s.                                         | Down               | Marrow 1 Only                                           |
| Dasatinib | Unstim   | 168-pH3        | CD11b- Monocytes   | 4.101E-06                          | 1.772E-03                                    | n.s.                               | n.s.                                         | Down               | Marrow 1 Only                                           |
| Dasatinib | Unstim   | 159-pSTAT3     | Immature B         | 9.164E-06                          | 3.959E-03                                    | n.s.                               | n.s.                                         | Down               | Marrow 1 Only                                           |
| Dasatinib | Unstim   | 171-pBtk/Itk   | Mature CD38lo B    | 9.800E-06                          | 4.233E-03                                    | n.s.                               | n.s.                                         | Down               | Marrow 1 Only                                           |
| Dasatinib | Unstim   | 174-pSrcFK     | Naïve CD8+ T       | 1.077E-05                          | 4.654E-03                                    | 5.849E-05                          | 2.527E-02                                    | Down               | Both                                                    |
| Dasatinib | Unstim   | 171-pBtk/Itk   | HSC                | 1.438E-05                          | 6.214E-03                                    | n.s.                               | n.s.                                         | Down               | Marrow 1 Only                                           |
| Dasatinib | Unstim   | 169-pP38       | CD11bhi Monocytes  | 1.740E-05                          | 7.519E-03                                    | n.s.                               | n.s.                                         | Down               | Marrow 1 Only                                           |
| Dasatinib | Unstim   | 174-pSrcFK     | Mature CD38lo B    | 1.854E-05                          | 8.008E-03                                    | n.s.                               | n.s.                                         | Down               | Marrow 1 Only                                           |
| Dasatinib | Unstim   | 174-pSrcFK     | Mature CD4+ T      | 2.659E-05                          | 1.149E-02                                    | 1.054E-04                          | 4.552E-02                                    | Down               | Both                                                    |
| Dasatinib | Unstim   | 174-pSrcFK     | Mature CD8+ T      | 2.669E-05                          | 1.153E-02                                    | 1.677E-05                          | 7.245E-03                                    | Down               | Both                                                    |
| Dasatinib | Unstim   | 159-pSTAT3     | HSC                | 2.773E-05                          | 1.198E-02                                    | n.s.                               | n.s.                                         | Down               | Marrow 1 Only                                           |
| Dasatinib | Unstim   | 174-pSrcFK     | Naïve CD4+ T       | 3.631E-05                          | 1.569E-02                                    | n.s.                               | n.s.                                         | Down               | Marrow 1 Only                                           |
| Dasatinib | Unstim   | 174-pSrcFK     | Plasmacytoid DC    | 3.782E-05                          | 1.634E-02                                    | n.s.                               | n.s.                                         | Down               | Marrow 1 Only                                           |
| Dasatinib | Unstim   | 159-pSTAT3     | CD11bhi Monocytes  | 5.538E-05                          | 2.392E-02                                    | 2.816E-05                          | 1.216E-02                                    | Down               | Both                                                    |
| Dasatinib | Unstim   | 174-pSrcFK     | NK                 | 5.718E-05                          | 2.470E-02                                    | 7.593E-06                          | 3.280E-03                                    | Down               | Both                                                    |
| Dasatinib | Unstim   | 171-pBtk/Itk   | Mature CD8+ T      | 6.339E-05                          | 2.738E-02                                    | n.s.                               | n.s.                                         | Down               | Marrow 1 Only                                           |
| Dasatinib | Unstim   | 172-pS6        | CD11bmid Monocytes | 7.153E-05                          | 3.090E-02                                    | n.s.                               | n.s.                                         | Down               | Marrow 1 Only                                           |
| Dasatinib | Unstim   | 159-pSTAT3     | CD11bmid Monocytes | 8.838E-05                          | 3.818E-02                                    | n.s.                               | n.s.                                         | Down               | Marrow 1 Only                                           |
| Dasatinib | Unstim   | 174-pSrcFK     | Immature B         | 9.382E-05                          | 4.053E-02                                    | n.s.                               | n.s.                                         | Down               | Marrow 1 Only                                           |
| Dasatinib | Unstim   | 174-pSrcFK     | Mature CD38mid B   | 9.551E-05                          | 4.126E-02                                    | n.s.                               | n.s.                                         | Down               | Marrow 1 Only                                           |
| Dasatinib | Unstim   | 141-pPLCgamma2 | CD11b- Monocytes   | 9.771E-05                          | 4.221E-02                                    | 1.097E-04                          | 4.737E-02                                    | Down               | Both                                                    |
| Dasatinib | Unstim   | 172-pS6        | Megakaryocyte      | 1.062E-04                          | 4.588E-02                                    | n.s.                               | n.s.                                         | Down               | Marrow 1 Only                                           |
| Dasatinib | Unstim   | 169-pP38       | Erythroblast       | n.s.                               | n.s.                                         | 2.581E-06                          | 1.115E-03                                    | Down               | Marrow 2 Only                                           |
| Dasatinib | Unstim   | 156-pZAP70/Syk | CD11b- Monocytes   | n.s.                               | n.s.                                         | 4.038E-06                          | 1.744E-03                                    | Down               | Marrow 2 Only                                           |
| Dasatinib | Unstim   | 174-pSrcFK     | Myelocyte          | n.s.                               | n.s.                                         | 1.954E-05                          | 8.443E-03                                    | Down               | Marrow 2 Only                                           |
| Dasatinib | Unstim   | 152-Ki67       | Plasma cell        | n.s.                               | n.s.                                         | 3.859E-05                          | 1.667E-02                                    | Up                 | Marrow 2 Only                                           |
| Dasatinib | Unstim   | 156-pZAP70/Syk | CD11bmid Monocytes | n.s.                               | n.s.                                         | 5.042E-05                          | 2.178E-02                                    | Down               | Marrow 2 Only                                           |
| Dasatinib | Unstim   | 164-pSLP-76    | Immature B         | n.s.                               | n.s.                                         | 6.411E-05                          | 2.770E-02                                    | Down               | Marrow 2 Only                                           |
| Dasatinib | Unstim   | 174-pSrcFK     | Erythroblast       | n.s.                               | n.s.                                         | 7.914E-05                          | 3.419E-02                                    | Down               | Marrow 2 Only                                           |
| Dasatinib | Unstim   | 151-pERK1/2    | HSC                | n.s.                               | n.s.                                         | 8.365E-05                          | 3.614E-02                                    | Down               | Marrow 2 Only                                           |
| Dasatinib | Unstim   | 164-pSLP-76    | CD11bmid Monocytes | n.s.                               | n.s.                                         | 9.206E-05                          | 3.977E-02                                    | Down               | Marrow 2 Only                                           |
| Dasatinib | BCR      | 174-pSrcFK     | CD11bhi Monocytes  | 1.478E-07                          | 6.386E-05                                    | 1.122E-06                          | 4.845E-04                                    | Down               | Both                                                    |
| Dasatinib | BCR      | 174-pSrcFK     | CD11bmid Monocytes | 1.630E-07                          | 7.041E-05                                    | 9.053E-06                          | 3.911E-03                                    | Down               | Both                                                    |
| Dasatinib | BCR      | 174-pSrcFK     | CD11b- Monocytes   | 3.388E-07                          | 1.464E-04                                    | 1.073E-04                          | 4.636E-02                                    | Down               | Both                                                    |
| Dasatinib | BCR      | 168-pH3        | CD11bhi Monocytes  | 7.394E-07                          | 3.194E-04                                    | 5.006E-05                          | 2.163E-02                                    | Down               | Both                                                    |
| Dasatinib | BCR      | 174-pSrcFK     | Pre-B II           | 8.452E-07                          | 3.651E-04                                    | n.s.                               | n.s.                                         | Down               | Marrow 1 Only                                           |
| Dasatinib | BCR      | 169-pP38       | CD11bmid Monocytes | 1.950E-06                          | 8.422E-04                                    | n.s.                               | n.s.                                         | Down               | Marrow 1 Only                                           |
| Dasatinib | BCR      | 168-pH3        | CD11bmid Monocytes | 2.367E-06                          | 1.023E-03                                    | 4.780E-05                          | 2.065E-02                                    | Down               | Both                                                    |
| Dasatinib | BCR      | 168-pH3        | CD11b- Monocytes   | 3.165E-06                          | 1.367E-03                                    | 1.086E-04                          | 4.691E-02                                    | Down               | Both                                                    |
| Dasatinib | BCR      | 174-pSrcFK     | Naïve CD8+ T       | 2.288E-05                          | 9.882E-03                                    | n.s.                               | n.s.                                         | Down               | Marrow 1 Only                                           |
| Dasatinib | BCR      | 171-pBtk/Itk   | Mature CD38lo B    | 2.616E-05                          | 1.130E-02                                    | n.s.                               | n.s.                                         | Down               | Marrow 1 Only                                           |
| Dasatinib | BCR      | 169-pP38       | CD11bhi Monocytes  | 3.378E-05                          | 1.459E-02                                    | n.s.                               | n.s.                                         | Down               | Marrow 1 Only                                           |
| Dasatinib | BCR      | 159-pSTAT3     | CD11bhi Monocytes  | 5.339E-05                          | 2.306E-02                                    | n.s.                               | n.s.                                         | Down               | Marrow 1 Only                                           |
| Dasatinib | BCR      | 174-pSrcFK     | Mature CD4+ T      | 6.657E-05                          | 2.876E-02                                    | n.s.                               | n.s.                                         | Down               | Marrow 1 Only                                           |
| Dasatinib | BCR      | 169-pP38       | CD11b- Monocytes   | 6.952E-05                          | 3.003E-02                                    | n.s.                               | n.s.                                         | Down               | Marrow 1 Only                                           |
| Dasatinib | BCR      | 171-pBtk/Itk   | HSC                | 7.294E-05                          | 3.151E-02                                    | n.s.                               | n.s.                                         | Down               | Marrow 1 Only                                           |
| Dasatinib | BCR      | 174-pSrcFK     | Mature CD8+ T      | 8.073E-05                          | 3.488E-02                                    | n.s.                               | n.s.                                         | Down               | Marrow 1 Only                                           |
| Dasatinib | BCR      | 174-pSrcFK     | Mature CD38lo B    | 8.667E-05                          | 3.744E-02                                    | n.s.                               | n.s.                                         | Down               | Marrow 1 Only                                           |
| Dasatinib | BCR      | 159-pSTAT3     | CD11bmid Monocytes | 8.739E-05                          | 3.775E-02                                    | n.s.                               | n.s.                                         | Down               | Marrow 1 Only                                           |
| Dasatinib | BCR      | 174-pSrcFK     | Naïve CD4+ T       | 9.184E-05                          | 3.967E-02                                    | n.s.                               | n.s.                                         | Down               | Marrow 1 Only                                           |
| Dasatinib | BCR      | 171-pBtk/Itk   | Mature CD8+ T      | 1.014E-04                          | 4.379E-02                                    | n.s.                               | n.s.                                         | Down               | Marrow 1 Only                                           |
| Dasatinib | BCR      | 141-pPLCgamma2 | CD11b- Monocytes   | 1.097E-04                          | 4.738E-02                                    | n.s.                               | n.s.                                         | Down               | Marrow 1 Only                                           |
| Dasatinib | BCR      | 174-pSrcFK     | NK                 | 1.111E-04                          | 4.801E-02                                    | n.s.                               | n.s.                                         | Down               | Marrow 1 Only                                           |
| Dasatinib | BCR      | 156-pZAP70/Syk | CD11b- Monocytes   | n.s.                               | n.s.                                         | 4.028E-05                          | 1.740E-02                                    | Down               | Marrow 2 Only                                           |
| Dasatinib | BCR      | 169-pP38       | Erythroblast       | n.s.                               | n.s.                                         | 5.609E-05                          | 2.423E-02                                    | Down               | Marrow 2 Only                                           |
| Dasatinib | BCR      | 151-pERK1/2    | Mature CD4+ T      | n.s.                               | n.s.                                         | 9.935E-05                          | 4.292E-02                                    | Up                 | Marrow 2 Only                                           |
| Dasatinib | Flt3L    | 174-pSrcFK     | CD11bhi Monocytes  | 1.745E-07                          | 7.539E-05                                    | 2.787E-07                          | 1.204E-04                                    | Down               | Both                                                    |
| Dasatinib | Flt3L    | 174-pSrcFK     | CD11bmid Monocytes | 1.980E-07                          | 8.551E-05                                    | 1.852E-06                          | 8.000E-04                                    | Down               | Both                                                    |
| Dasatinib | Flt3L    | 174-pSrcFK     | CD11b- Monocytes   | 5.056E-07                          | 2.184E-04                                    | 1.549E-05                          | 6.691E-03                                    | Down               | Both                                                    |
| Dasatinib | Flt3L    | 174-pSrcFK     | Pre-B II           | 5.267E-07                          | 2.275E-04                                    | 3.179E-05                          | 1.373E-02                                    | Down               | Both                                                    |
| Dasatinib | Flt3L    | 168-pH3        | CD11bhi Monocytes  | 8.431E-07                          | 3.642E-04                                    | 3.186E-05                          | 1.377E-02                                    | Down               | Both                                                    |
| Dasatinib | Flt3L    | 169-pP38       | CD11bmid Monocytes | 2.770E-06                          | 1.197E-03                                    | n.s.                               | n.s.                                         | Down               | Marrow 1 Only                                           |
| Dasatinib | Flt3L    | 168-pH3        | CD11bmid Monocytes | 3.577E-06                          | 1.545E-03                                    | 3.356E-05                          | 1.450E-02                                    | Down               | Both                                                    |
| Dasatinib | Flt3L    | 174-pSrcFK     | Naïve CD8+ T       | 8.633E-06                          | 3.729E-03                                    | 3.477E-05                          | 1.502E-02                                    | Down               | Both                                                    |
| Dasatinib | Flt3L    | 168-pH3        | CD11b- Monocytes   | 8.853E-06                          | 3.824E-03                                    | 1.074E-04                          | 4.641E-02                                    | Down               | Both                                                    |
| Dasatinib | Flt3L    | 171-pBtk/Itk   | Mature CD38lo B    | 8.930E-06                          | 3.858E-03                                    | n.s.                               | n.s.                                         | Down               | Marrow 1 Only                                           |
| Dasatinib | Flt3L    | 169-pP38       | CD11bhi Monocytes  | 1.589E-05                          | 6.864E-03                                    | n.s.                               | n.s.                                         | Down               | Marrow 1 Only                                           |
| Dasatinib | Flt3L    | 174-pSrcFK     | Mature CD38lo B    | 1.843E-05                          | 7.963E-03                                    | n.s.                               | n.s.                                         | Down               | Marrow 1 Only                                           |



| Inhibitor | Stimulus | Antibody       | Population         | Marrow 1 unadjusted t-test P value | Marrow 1 Bonferroni-corrected t-test P value | Marrow 2 unadjusted t-test P value | Marrow 2 Bonferroni-corrected t-test P value | Direction of Shift | Dataset(s) with significant shift (Bonferroni P < 0.05) |
|-----------|----------|----------------|--------------------|------------------------------------|----------------------------------------------|------------------------------------|----------------------------------------------|--------------------|---------------------------------------------------------|
| Dasatinib | Flt3L    | 171-pBtk/Itk   | HSC                | 1.912E-05                          | 8.261E-03                                    | n.s.                               | n.s.                                         | Down               | Marrow 1 Only                                           |
| Dasatinib | Flt3L    | 159-pSTAT3     | Immature B         | 1.928E-05                          | 8.330E-03                                    | n.s.                               | n.s.                                         | Down               | Marrow 1 Only                                           |
| Dasatinib | Flt3L    | 174-pSrcFK     | Mature CD4+ T      | 2.120E-05                          | 9.158E-03                                    | 6.503E-05                          | 2.809E-02                                    | Down               | Both                                                    |
| Dasatinib | Flt3L    | 174-pSrcFK     | Mature CD8+ T      | 2.162E-05                          | 9.341E-03                                    | 1.160E-05                          | 5.013E-03                                    | Down               | Both                                                    |
| Dasatinib | Flt3L    | 174-pSrcFK     | Naïve CD4+ T       | 2.723E-05                          | 1.176E-02                                    | 9.114E-05                          | 3.937E-02                                    | Down               | Both                                                    |
| Dasatinib | Flt3L    | 171-pBtk/Itk   | Mature CD8+ T      | 4.459E-05                          | 1.926E-02                                    | n.s.                               | n.s.                                         | Down               | Marrow 1 Only                                           |
| Dasatinib | Flt3L    | 174-pSrcFK     | Plasmacytoid DC    | 4.848E-05                          | 2.094E-02                                    | n.s.                               | n.s.                                         | Down               | Marrow 1 Only                                           |
| Dasatinib | Flt3L    | 151-pERK1/2    | Plasma cell        | 4.918E-05                          | 2.125E-02                                    | n.s.                               | n.s.                                         | Up                 | Marrow 1 Only                                           |
| Dasatinib | Flt3L    | 159-pSTAT3     | CD11bhi Monocytes  | 4.947E-05                          | 2.137E-02                                    | 2.977E-06                          | 1.286E-03                                    | Down               | Both                                                    |
| Dasatinib | Flt3L    | 174-pSrcFK     | NK                 | 5.489E-05                          | 2.371E-02                                    | 6.076E-06                          | 2.625E-03                                    | Down               | Both                                                    |
| Dasatinib | Flt3L    | 166-IkBalpa    | MEP                | 7.770E-05                          | 3.356E-02                                    | n.s.                               | n.s.                                         | Up                 | Marrow 1 Only                                           |
| Dasatinib | Flt3L    | 159-pSTAT3     | CD11bmid Monocytes | 8.325E-05                          | 3.596E-02                                    | n.s.                               | n.s.                                         | Down               | Marrow 1 Only                                           |
| Dasatinib | Flt3L    | 172-pS6        | CD11bmid Monocytes | 8.544E-05                          | 3.691E-02                                    | n.s.                               | n.s.                                         | Down               | Marrow 1 Only                                           |
| Dasatinib | Flt3L    | 176-pCREB      | Plasmacytoid DC    | 9.450E-05                          | 4.082E-02                                    | n.s.                               | n.s.                                         | Up                 | Marrow 1 Only                                           |
| Dasatinib | Flt3L    | 174-pSrcFK     | Mature CD38mid B   | 9.551E-05                          | 4.126E-02                                    | n.s.                               | n.s.                                         | Down               | Marrow 1 Only                                           |
| Dasatinib | Flt3L    | 159-pSTAT3     | HSC                | 1.115E-04                          | 4.817E-02                                    | n.s.                               | n.s.                                         | Down               | Marrow 1 Only                                           |
| Dasatinib | Flt3L    | 169-pP38       | Erythroblast       | n.s.                               | n.s.                                         | 2.516E-06                          | 1.087E-03                                    | Down               | Marrow 2 Only                                           |
| Dasatinib | Flt3L    | 156-pZAP70/Syk | CD11b- Monocytes   | n.s.                               | n.s.                                         | 7.938E-06                          | 3.429E-03                                    | Down               | Marrow 2 Only                                           |
| Dasatinib | Flt3L    | 151-pERK1/2    | HSC                | n.s.                               | n.s.                                         | 1.354E-05                          | 5.849E-03                                    | Up                 | Marrow 2 Only                                           |
| Dasatinib | Flt3L    | 174-pSrcFK     | Myelocyte          | n.s.                               | n.s.                                         | 2.535E-05                          | 1.095E-02                                    | Down               | Marrow 2 Only                                           |
| Dasatinib | Flt3L    | 151-pERK1/2    | MEP                | n.s.                               | n.s.                                         | 5.428E-05                          | 2.345E-02                                    | Up                 | Marrow 2 Only                                           |
| Dasatinib | Flt3L    | 156-pZAP70/Syk | CD11bmid Monocytes | n.s.                               | n.s.                                         | 6.920E-05                          | 2.989E-02                                    | Down               | Marrow 2 Only                                           |
| Dasatinib | Flt3L    | 176-pCREB      | CD11bmid Monocytes | n.s.                               | n.s.                                         | 7.142E-05                          | 3.085E-02                                    | Down               | Marrow 2 Only                                           |
| Dasatinib | Flt3L    | 174-pSrcFK     | GMP                | n.s.                               | n.s.                                         | 8.707E-05                          | 3.761E-02                                    | Down               | Marrow 2 Only                                           |
| Dasatinib | Flt3L    | 164-pSLP-76    | CD11bmid Monocytes | n.s.                               | n.s.                                         | 8.886E-05                          | 3.839E-02                                    | Down               | Marrow 2 Only                                           |
| Dasatinib | Flt3L    | 141-pPLCgamma2 | CD11b- Monocytes   | n.s.                               | n.s.                                         | 1.031E-04                          | 4.452E-02                                    | Down               | Marrow 2 Only                                           |
| Dasatinib | IL7      | 174-pSrcFK     | CD11bmid Monocytes | 1.639E-07                          | 7.079E-05                                    | 3.218E-06                          | 1.390E-03                                    | Down               | Both                                                    |
| Dasatinib | IL7      | 174-pSrcFK     | CD11bhi Monocytes  | 1.664E-07                          | 7.189E-05                                    | 4.758E-07                          | 2.055E-04                                    | Down               | Both                                                    |
| Dasatinib | IL7      | 174-pSrcFK     | Pre-B II           | 3.725E-07                          | 1.609E-04                                    | 4.139E-05                          | 1.788E-02                                    | Down               | Both                                                    |
| Dasatinib | IL7      | 174-pSrcFK     | CD11b- Monocytes   | 3.867E-07                          | 1.670E-04                                    | 2.547E-05                          | 1.100E-02                                    | Down               | Both                                                    |
| Dasatinib | IL7      | 169-pP38       | CD11bmid Monocytes | 5.724E-07                          | 2.473E-04                                    | n.s.                               | n.s.                                         | Down               | Marrow 1 Only                                           |
| Dasatinib | IL7      | 168-pH3        | CD11bhi Monocytes  | 8.532E-07                          | 3.686E-04                                    | 2.752E-05                          | 1.189E-02                                    | Down               | Both                                                    |
| Dasatinib | IL7      | 150-pSTAT5     | Naïve CD4+ T       | 2.221E-06                          | 9.594E-04                                    | n.s.                               | n.s.                                         | Up                 | Marrow 1 Only                                           |
| Dasatinib | IL7      | 168-pH3        | CD11bmid Monocytes | 3.450E-06                          | 1.491E-03                                    | 3.021E-05                          | 1.305E-02                                    | Down               | Both                                                    |
| Dasatinib | IL7      | 166-IkBalpa    | MEP                | 3.540E-06                          | 1.529E-03                                    | n.s.                               | n.s.                                         | Up                 | Marrow 1 Only                                           |
| Dasatinib | IL7      | 171-pBtk/Itk   | Mature CD38lo B    | 3.668E-06                          | 1.585E-03                                    | n.s.                               | n.s.                                         | Down               | Marrow 1 Only                                           |
| Dasatinib | IL7      | 159-pSTAT3     | Immature B         | 3.726E-06                          | 1.610E-03                                    | n.s.                               | n.s.                                         | Down               | Marrow 1 Only                                           |
| Dasatinib | IL7      | 150-pSTAT5     | Naïve CD8+ T       | 4.010E-06                          | 1.732E-03                                    | n.s.                               | n.s.                                         | Up                 | Marrow 1 Only                                           |
| Dasatinib | IL7      | 171-pBtk/Itk   | HSC                | 5.205E-06                          | 2.249E-03                                    | n.s.                               | n.s.                                         | Down               | Marrow 1 Only                                           |
| Dasatinib | IL7      | 168-pH3        | CD11b- Monocytes   | 5.647E-06                          | 2.440E-03                                    | 8.078E-05                          | 3.490E-02                                    | Down               | Both                                                    |
| Dasatinib | IL7      | 169-pP38       | CD11bhi Monocytes  | 6.200E-06                          | 2.678E-03                                    | n.s.                               | n.s.                                         | Down               | Marrow 1 Only                                           |
| Dasatinib | IL7      | 174-pSrcFK     | Naïve CD8+ T       | 7.315E-06                          | 3.160E-03                                    | 5.188E-05                          | 2.241E-02                                    | Down               | Both                                                    |
| Dasatinib | IL7      | 150-pSTAT5     | Mature CD4+ T      | 7.801E-06                          | 3.370E-03                                    | 7.691E-05                          | 3.322E-02                                    | Up                 | Both                                                    |
| Dasatinib | IL7      | 171-pBtk/Itk   | Mature CD8+ T      | 1.528E-05                          | 6.600E-03                                    | n.s.                               | n.s.                                         | Down               | Marrow 1 Only                                           |
| Dasatinib | IL7      | 174-pSrcFK     | Mature CD38lo B    | 1.546E-05                          | 6.679E-03                                    | n.s.                               | n.s.                                         | Down               | Marrow 1 Only                                           |
| Dasatinib | IL7      | 166-IkBalpa    | CD11bhi Monocytes  | 1.715E-05                          | 7.409E-03                                    | n.s.                               | n.s.                                         | Up                 | Marrow 1 Only                                           |
| Dasatinib | IL7      | 174-pSrcFK     | Mature CD4+ T      | 1.773E-05                          | 7.660E-03                                    | 9.963E-05                          | 4.304E-02                                    | Down               | Both                                                    |
| Dasatinib | IL7      | 150-pSTAT5     | Mature CD8+ T      | 1.901E-05                          | 8.213E-03                                    | n.s.                               | n.s.                                         | Up                 | Marrow 1 Only                                           |
| Dasatinib | IL7      | 174-pSrcFK     | Mature CD8+ T      | 2.026E-05                          | 8.752E-03                                    | 2.313E-05                          | 9.992E-03                                    | Down               | Both                                                    |
| Dasatinib | IL7      | 169-pP38       | CD11b- Monocytes   | 2.287E-05                          | 9.881E-03                                    | n.s.                               | n.s.                                         | Down               | Marrow 1 Only                                           |
| Dasatinib | IL7      | 174-pSrcFK     | Naïve CD4+ T       | 2.423E-05                          | 1.047E-02                                    | n.s.                               | n.s.                                         | Down               | Marrow 1 Only                                           |
| Dasatinib | IL7      | 174-pSrcFK     | Plasmacytoid DC    | 3.340E-05                          | 1.443E-02                                    | n.s.                               | n.s.                                         | Down               | Marrow 1 Only                                           |
| Dasatinib | IL7      | 171-pBtk/Itk   | Mature CD4+ T      | 3.889E-05                          | 1.680E-02                                    | n.s.                               | n.s.                                         | Down               | Marrow 1 Only                                           |
| Dasatinib | IL7      | 159-pSTAT3     | CD11bhi Monocytes  | 4.407E-05                          | 1.904E-02                                    | 6.739E-06                          | 2.911E-03                                    | Down               | Both                                                    |
| Dasatinib | IL7      | 176-pCREB      | Naïve CD4+ T       | 4.473E-05                          | 1.932E-02                                    | n.s.                               | n.s.                                         | Up                 | Marrow 1 Only                                           |
| Dasatinib | IL7      | 174-pSrcFK     | NK                 | 5.077E-05                          | 2.193E-02                                    | 1.043E-05                          | 4.508E-03                                    | Down               | Both                                                    |
| Dasatinib | IL7      | 174-pSrcFK     | Mature CD38mid B   | 5.098E-05                          | 2.202E-02                                    | n.s.                               | n.s.                                         | Down               | Marrow 1 Only                                           |
| Dasatinib | IL7      | 176-pCREB      | Plasmacytoid DC    | 5.126E-05                          | 2.214E-02                                    | n.s.                               | n.s.                                         | Up                 | Marrow 1 Only                                           |
| Dasatinib | IL7      | 159-pSTAT3     | HSC                | 5.253E-05                          | 2.269E-02                                    | n.s.                               | n.s.                                         | Down               | Marrow 1 Only                                           |
| Dasatinib | IL7      | 166-IkBalpa    | Plasmacytoid DC    | 6.003E-05                          | 2.593E-02                                    | n.s.                               | n.s.                                         | Up                 | Marrow 1 Only                                           |
| Dasatinib | IL7      | 159-pSTAT3     | CD11bmid Monocytes | 6.114E-05                          | 2.641E-02                                    | n.s.                               | n.s.                                         | Down               | Marrow 1 Only                                           |
| Dasatinib | IL7      | 159-pSTAT3     | Pre-B II           | 6.569E-05                          | 2.838E-02                                    | n.s.                               | n.s.                                         | Down               | Marrow 1 Only                                           |
| Dasatinib | IL7      | 171-pBtk/Itk   | Naïve CD8+ T       | 7.491E-05                          | 3.236E-02                                    | n.s.                               | n.s.                                         | Down               | Marrow 1 Only                                           |
| Dasatinib | IL7      | 166-IkBalpa    | GMP                | 7.772E-05                          | 3.357E-02                                    | n.s.                               | n.s.                                         | Up                 | Marrow 1 Only                                           |
| Dasatinib | IL7      | 171-pBtk/Itk   | MEP                | 9.523E-05                          | 4.114E-02                                    | n.s.                               | n.s.                                         | Down               | Marrow 1 Only                                           |
| Dasatinib | IL7      | 172-pS6        | CD11bmid Monocytes | 9.880E-05                          | 4.268E-02                                    | n.s.                               | n.s.                                         | Down               | Marrow 1 Only                                           |
| Dasatinib | IL7      | 166-IkBalpa    | CD11bmid Monocytes | 9.889E-05                          | 4.272E-02                                    | n.s.                               | n.s.                                         | Up                 | Marrow 1 Only                                           |
| Dasatinib | IL7      | 172-pS6        | Megakaryocyte      | 1.001E-04                          | 4.323E-02                                    | n.s.                               | n.s.                                         | Down               | Marrow 1 Only                                           |

| Inhibitor | Stimulus | Antibody       | Population         | Marrow 1 unadjusted t-test P value | Marrow 1 Bonferroni-corrected t-test P value | Marrow 2 unadjusted t-test P value | Marrow 2 Bonferroni-corrected t-test P value | Direction of Shift | Dataset(s) with significant shift (Bonferroni P < 0.05) |
|-----------|----------|----------------|--------------------|------------------------------------|----------------------------------------------|------------------------------------|----------------------------------------------|--------------------|---------------------------------------------------------|
| Dasatinib | IL7      | 166-IkBalp     | Pre-B I            | 1.030E-04                          | 4.447E-02                                    | n.s.                               | n.s.                                         | Up                 | Marrow 1 Only                                           |
| Dasatinib | IL7      | 172-pS6        | Erythroblast       | 1.049E-04                          | 4.533E-02                                    | n.s.                               | n.s.                                         | Down               | Marrow 1 Only                                           |
| Dasatinib | IL7      | 141-pLcGama2   | CD11b- Monocytes   | 1.130E-04                          | 4.880E-02                                    | 1.031E-04                          | 4.452E-02                                    | Down               | Both                                                    |
| Dasatinib | IL7      | 174-pSrcFK     | Immature B         | 1.153E-04                          | 4.979E-02                                    | n.s.                               | n.s.                                         | Down               | Marrow 1 Only                                           |
| Dasatinib | IL7      | 171-pBtk/Itk   | CD11b- Monocytes   | 1.157E-04                          | 4.999E-02                                    | n.s.                               | n.s.                                         | Down               | Marrow 1 Only                                           |
| Dasatinib | IL7      | 169-pP38       | Erythroblast       | n.s.                               | n.s.                                         | 2.116E-06                          | 9.142E-04                                    | Down               | Marrow 2 Only                                           |
| Dasatinib | IL7      | 156-pZAP70/Syk | CD11b- Monocytes   | n.s.                               | n.s.                                         | 4.754E-06                          | 2.054E-03                                    | Down               | Marrow 2 Only                                           |
| Dasatinib | IL7      | 174-pSrcFK     | GMP                | n.s.                               | n.s.                                         | 3.740E-05                          | 1.616E-02                                    | Down               | Marrow 2 Only                                           |
| Dasatinib | IL7      | 156-pZAP70/Syk | CD11bmid Monocytes | n.s.                               | n.s.                                         | 5.467E-05                          | 2.362E-02                                    | Down               | Marrow 2 Only                                           |
| Dasatinib | IL7      | 174-pSrcFK     | Myelocyte          | n.s.                               | n.s.                                         | 6.282E-05                          | 2.714E-02                                    | Down               | Marrow 2 Only                                           |
| Dasatinib | IL7      | 152-Ki67       | Plasma cell        | n.s.                               | n.s.                                         | 6.520E-05                          | 2.817E-02                                    | Up                 | Marrow 2 Only                                           |
| Dasatinib | IL7      | 164-pSLP-76    | CD11bmid Monocytes | n.s.                               | n.s.                                         | 7.737E-05                          | 3.342E-02                                    | Down               | Marrow 2 Only                                           |
| Dasatinib | IL7      | 176-pCREB      | CD11bmid Monocytes | n.s.                               | n.s.                                         | 9.240E-05                          | 3.992E-02                                    | Down               | Marrow 2 Only                                           |
| Dasatinib | IL7      | 176-pCREB      | CD11b- Monocytes   | n.s.                               | n.s.                                         | 9.676E-05                          | 4.180E-02                                    | Down               | Marrow 2 Only                                           |
| Dasatinib | IL7      | 175-pCrkL      | GMP                | n.s.                               | n.s.                                         | 1.064E-04                          | 4.598E-02                                    | Down               | Marrow 2 Only                                           |
| Dasatinib | PMAiono  | 176-pCREB      | Naïve CD4+ T       | 5.097E-08                          | 2.202E-05                                    | 2.578E-06                          | 1.114E-03                                    | Up                 | Both                                                    |
| Dasatinib | PMAiono  | 174-pSrcFK     | CD11bhi Monocytes  | 1.408E-07                          | 6.082E-05                                    | 6.552E-07                          | 2.830E-04                                    | Down               | Both                                                    |
| Dasatinib | PMAiono  | 172-pS6        | Mature CD4+ T      | 2.145E-07                          | 9.267E-05                                    | n.s.                               | n.s.                                         | Up                 | Marrow 1 Only                                           |
| Dasatinib | PMAiono  | 174-pSrcFK     | CD11bmid Monocytes | 2.226E-07                          | 9.618E-05                                    | 6.421E-06                          | 2.774E-03                                    | Down               | Both                                                    |
| Dasatinib | PMAiono  | 172-pS6        | Naïve CD8+ T       | 3.149E-07                          | 1.360E-04                                    | n.s.                               | n.s.                                         | Up                 | Marrow 1 Only                                           |
| Dasatinib | PMAiono  | 151-pERK1/2    | Plasma cell        | 6.242E-07                          | 2.696E-04                                    | n.s.                               | n.s.                                         | Up                 | Marrow 1 Only                                           |
| Dasatinib | PMAiono  | 174-pSrcFK     | CD11b- Monocytes   | 6.922E-07                          | 2.990E-04                                    | 1.052E-04                          | 4.545E-02                                    | Down               | Both                                                    |
| Dasatinib | PMAiono  | 172-pS6        | Naïve CD4+ T       | 9.902E-07                          | 4.278E-04                                    | n.s.                               | n.s.                                         | Up                 | Marrow 1 Only                                           |
| Dasatinib | PMAiono  | 174-pSrcFK     | Pre-B II           | 1.210E-06                          | 5.227E-04                                    | n.s.                               | n.s.                                         | Down               | Marrow 1 Only                                           |
| Dasatinib | PMAiono  | 176-pCREB      | Plasmacytoid DC    | 2.348E-06                          | 1.014E-03                                    | n.s.                               | n.s.                                         | Up                 | Marrow 1 Only                                           |
| Dasatinib | PMAiono  | 168-pH3        | Naïve CD4+ T       | 4.107E-06                          | 1.774E-03                                    | 6.208E-06                          | 2.682E-03                                    | Up                 | Both                                                    |
| Dasatinib | PMAiono  | 172-pS6        | Plasmacytoid DC    | 4.137E-06                          | 1.787E-03                                    | n.s.                               | n.s.                                         | Up                 | Marrow 1 Only                                           |
| Dasatinib | PMAiono  | 172-pS6        | Pre-B II           | 5.154E-06                          | 2.226E-03                                    | n.s.                               | n.s.                                         | Up                 | Marrow 1 Only                                           |
| Dasatinib | PMAiono  | 172-pS6        | Pre-B I            | 5.618E-06                          | 2.427E-03                                    | n.s.                               | n.s.                                         | Up                 | Marrow 1 Only                                           |
| Dasatinib | PMAiono  | 172-pS6        | CD11b- Monocytes   | 6.024E-06                          | 2.602E-03                                    | n.s.                               | n.s.                                         | Up                 | Marrow 1 Only                                           |
| Dasatinib | PMAiono  | 176-pCREB      | Mature CD38lo B    | 6.742E-06                          | 2.912E-03                                    | 7.371E-06                          | 3.184E-03                                    | Up                 | Both                                                    |
| Dasatinib | PMAiono  | 176-pCREB      | Pre-B I            | 8.716E-06                          | 3.765E-03                                    | 7.219E-06                          | 3.119E-03                                    | Up                 | Both                                                    |
| Dasatinib | PMAiono  | 172-pS6        | Immature B         | 8.989E-06                          | 3.883E-03                                    | n.s.                               | n.s.                                         | Up                 | Marrow 1 Only                                           |
| Dasatinib | PMAiono  | 172-pS6        | Mature CD8+ T      | 8.997E-06                          | 3.886E-03                                    | n.s.                               | n.s.                                         | Up                 | Marrow 1 Only                                           |
| Dasatinib | PMAiono  | 176-pCREB      | Naïve CD8+ T       | 9.497E-06                          | 4.103E-03                                    | 2.480E-05                          | 1.071E-02                                    | Up                 | Both                                                    |
| Dasatinib | PMAiono  | 172-pS6        | CD11bmid Monocytes | 9.945E-06                          | 4.296E-03                                    | n.s.                               | n.s.                                         | Up                 | Marrow 1 Only                                           |
| Dasatinib | PMAiono  | 172-pS6        | GMP                | 1.068E-05                          | 4.613E-03                                    | n.s.                               | n.s.                                         | Up                 | Marrow 1 Only                                           |
| Dasatinib | PMAiono  | 172-pS6        | Mature CD38lo B    | 1.176E-05                          | 5.079E-03                                    | n.s.                               | n.s.                                         | Up                 | Marrow 1 Only                                           |
| Dasatinib | PMAiono  | 176-pCREB      | Mature CD38mid B   | 1.471E-05                          | 6.354E-03                                    | 1.621E-05                          | 7.003E-03                                    | Up                 | Both                                                    |
| Dasatinib | PMAiono  | 165-pNFkB      | Naïve CD8+ T       | 1.702E-05                          | 7.352E-03                                    | 6.841E-05                          | 2.955E-02                                    | Up                 | Both                                                    |
| Dasatinib | PMAiono  | 165-pNFkB      | Naïve CD4+ T       | 1.832E-05                          | 7.916E-03                                    | 5.206E-05                          | 2.249E-02                                    | Up                 | Both                                                    |
| Dasatinib | PMAiono  | 172-pS6        | NK                 | 2.033E-05                          | 8.782E-03                                    | n.s.                               | n.s.                                         | Up                 | Marrow 1 Only                                           |
| Dasatinib | PMAiono  | 168-pH3        | Mature CD38lo B    | 2.162E-05                          | 9.340E-03                                    | 7.785E-06                          | 3.363E-03                                    | Up                 | Both                                                    |
| Dasatinib | PMAiono  | 168-pH3        | Mature CD4+ T      | 2.981E-05                          | 1.288E-02                                    | 2.204E-06                          | 9.522E-04                                    | Up                 | Both                                                    |
| Dasatinib | PMAiono  | 166-IkBalp     | Plasmacytoid DC    | 3.162E-05                          | 1.366E-02                                    | n.s.                               | n.s.                                         | Down               | Marrow 1 Only                                           |
| Dasatinib | PMAiono  | 166-IkBalp     | CD11bhi Monocytes  | 3.536E-05                          | 1.528E-02                                    | n.s.                               | n.s.                                         | Up                 | Marrow 1 Only                                           |
| Dasatinib | PMAiono  | 176-pCREB      | Pre-B II           | 3.539E-05                          | 1.529E-02                                    | 3.217E-05                          | 1.390E-02                                    | Up                 | Both                                                    |
| Dasatinib | PMAiono  | 171-pBtk/Itk   | Mature CD38lo B    | 3.849E-05                          | 1.663E-02                                    | n.s.                               | n.s.                                         | Down               | Marrow 1 Only                                           |
| Dasatinib | PMAiono  | 168-pH3        | Immature B         | 4.007E-05                          | 1.731E-02                                    | 9.751E-07                          | 4.212E-04                                    | Up                 | Both                                                    |
| Dasatinib | PMAiono  | 151-pERK1/2    | CD11b- Monocytes   | 4.029E-05                          | 1.741E-02                                    | 7.527E-05                          | 3.251E-02                                    | Up                 | Both                                                    |
| Dasatinib | PMAiono  | 172-pS6        | HSC                | 4.034E-05                          | 1.743E-02                                    | n.s.                               | n.s.                                         | Up                 | Marrow 1 Only                                           |
| Dasatinib | PMAiono  | 176-pCREB      | Mature CD4+ T      | 4.330E-05                          | 1.871E-02                                    | 1.048E-05                          | 4.526E-03                                    | Up                 | Both                                                    |
| Dasatinib | PMAiono  | 176-pCREB      | HSC                | 4.525E-05                          | 1.955E-02                                    | 8.728E-05                          | 3.770E-02                                    | Up                 | Both                                                    |
| Dasatinib | PMAiono  | 174-pSrcFK     | Naïve CD8+ T       | 4.829E-05                          | 2.086E-02                                    | n.s.                               | n.s.                                         | Down               | Marrow 1 Only                                           |
| Dasatinib | PMAiono  | 168-pH3        | Plasmacytoid DC    | 5.402E-05                          | 2.334E-02                                    | n.s.                               | n.s.                                         | Up                 | Marrow 1 Only                                           |
| Dasatinib | PMAiono  | 171-pBtk/Itk   | HSC                | 6.279E-05                          | 2.713E-02                                    | n.s.                               | n.s.                                         | Down               | Marrow 1 Only                                           |
| Dasatinib | PMAiono  | 168-pH3        | Naïve CD8+ T       | 6.611E-05                          | 2.856E-02                                    | 5.733E-05                          | 2.477E-02                                    | Up                 | Both                                                    |
| Dasatinib | PMAiono  | 172-pS6        | CD11bhi Monocytes  | 7.270E-05                          | 3.141E-02                                    | n.s.                               | n.s.                                         | Up                 | Marrow 1 Only                                           |
| Dasatinib | PMAiono  | 151-pERK1/2    | CD11bmid Monocytes | 7.405E-05                          | 3.199E-02                                    | 7.369E-05                          | 3.183E-02                                    | Up                 | Both                                                    |
| Dasatinib | PMAiono  | 172-pS6        | MEP                | 7.792E-05                          | 3.366E-02                                    | n.s.                               | n.s.                                         | Up                 | Marrow 1 Only                                           |
| Dasatinib | PMAiono  | 151-pERK1/2    | HSC                | 1.059E-04                          | 4.576E-02                                    | 7.401E-08                          | 3.197E-05                                    | Up                 | Both                                                    |
| Dasatinib | PMAiono  | 151-pERK1/2    | CD11bhi Monocytes  | 1.119E-04                          | 4.833E-02                                    | 1.052E-04                          | 4.545E-02                                    | Up                 | Both                                                    |
| Dasatinib | PMAiono  | 174-pSrcFK     | Mature CD8+ T      | 1.139E-04                          | 4.923E-02                                    | n.s.                               | n.s.                                         | Down               | Marrow 1 Only                                           |
| Dasatinib | PMAiono  | 151-pERK1/2    | Mature CD4+ T      | n.s.                               | n.s.                                         | 2.160E-08                          | 9.331E-06                                    | Up                 | Marrow 2 Only                                           |
| Dasatinib | PMAiono  | 151-pERK1/2    | Naïve CD4+ T       | n.s.                               | n.s.                                         | 4.273E-08                          | 1.846E-05                                    | Up                 | Marrow 2 Only                                           |
| Dasatinib | PMAiono  | 151-pERK1/2    | Mature CD38lo B    | n.s.                               | n.s.                                         | 7.245E-08                          | 3.130E-05                                    | Up                 | Marrow 2 Only                                           |
| Dasatinib | PMAiono  | 151-pERK1/2    | MEP                | n.s.                               | n.s.                                         | 2.608E-07                          | 1.127E-04                                    | Up                 | Marrow 2 Only                                           |
| Dasatinib | PMAiono  | 151-pERK1/2    | Naïve CD8+ T       | n.s.                               | n.s.                                         | 3.971E-07                          | 1.715E-04                                    | Up                 | Marrow 2 Only                                           |

| Inhibitor | Stimulus | Antibody      | Population         | Marrow 1 unadjusted t-test P value | Marrow 1 Bonferroni-corrected t-test P value | Marrow 2 unadjusted t-test P value | Marrow 2 Bonferroni-corrected t-test P value | Direction of Shift | Dataset(s) with significant shift (Bonferroni P < 0.05) |
|-----------|----------|---------------|--------------------|------------------------------------|----------------------------------------------|------------------------------------|----------------------------------------------|--------------------|---------------------------------------------------------|
| Dasatinib | PMAiono  | 151-pERK1/2   | CMP                | n.s.                               | n.s.                                         | 1.363E-06                          | 5.887E-04                                    | Up                 | Marrow 2 Only                                           |
| Dasatinib | PMAiono  | 151-pERK1/2   | Mature CD8+ T      | n.s.                               | n.s.                                         | 1.364E-06                          | 5.891E-04                                    | Up                 | Marrow 2 Only                                           |
| Dasatinib | PMAiono  | 151-pERK1/2   | Mature CD38mid B   | n.s.                               | n.s.                                         | 1.695E-06                          | 7.320E-04                                    | Up                 | Marrow 2 Only                                           |
| Dasatinib | PMAiono  | 151-pERK1/2   | Pre-B II           | n.s.                               | n.s.                                         | 3.714E-06                          | 1.604E-03                                    | Up                 | Marrow 2 Only                                           |
| Dasatinib | PMAiono  | 151-pERK1/2   | NK                 | n.s.                               | n.s.                                         | 3.845E-06                          | 1.661E-03                                    | Up                 | Marrow 2 Only                                           |
| Dasatinib | PMAiono  | 151-pERK1/2   | MPP                | n.s.                               | n.s.                                         | 4.279E-06                          | 1.848E-03                                    | Up                 | Marrow 2 Only                                           |
| Dasatinib | PMAiono  | 151-pERK1/2   | GMP                | n.s.                               | n.s.                                         | 7.979E-06                          | 3.447E-03                                    | Up                 | Marrow 2 Only                                           |
| Dasatinib | PMAiono  | 176-pCREB     | CMP                | n.s.                               | n.s.                                         | 1.010E-05                          | 4.365E-03                                    | Up                 | Marrow 2 Only                                           |
| Dasatinib | PMAiono  | 151-pERK1/2   | Pre-B I            | n.s.                               | n.s.                                         | 1.289E-05                          | 5.569E-03                                    | Up                 | Marrow 2 Only                                           |
| Dasatinib | PMAiono  | 176-pCREB     | NK                 | n.s.                               | n.s.                                         | 1.357E-05                          | 5.863E-03                                    | Up                 | Marrow 2 Only                                           |
| Dasatinib | PMAiono  | 165-pNFkB     | Plasmacytoid DC    | n.s.                               | n.s.                                         | 1.590E-05                          | 6.870E-03                                    | Up                 | Marrow 2 Only                                           |
| Dasatinib | PMAiono  | 176-pCREB     | MPP                | n.s.                               | n.s.                                         | 1.718E-05                          | 7.424E-03                                    | Up                 | Marrow 2 Only                                           |
| Dasatinib | PMAiono  | 165-pNFkB     | Mature CD4+ T      | n.s.                               | n.s.                                         | 2.677E-05                          | 1.157E-02                                    | Up                 | Marrow 2 Only                                           |
| Dasatinib | PMAiono  | 153-pMAPKAPK2 | GMP                | n.s.                               | n.s.                                         | 4.044E-05                          | 1.747E-02                                    | Up                 | Marrow 2 Only                                           |
| Dasatinib | PMAiono  | 174-pSrcFK    | NK                 | n.s.                               | n.s.                                         | 4.381E-05                          | 1.893E-02                                    | Down               | Marrow 2 Only                                           |
| Dasatinib | PMAiono  | 165-pNFkB     | Immature B         | n.s.                               | n.s.                                         | 4.744E-05                          | 2.049E-02                                    | Up                 | Marrow 2 Only                                           |
| Dasatinib | PMAiono  | 176-pCREB     | GMP                | n.s.                               | n.s.                                         | 5.258E-05                          | 2.272E-02                                    | Up                 | Marrow 2 Only                                           |
| Dasatinib | PMAiono  | 176-pCREB     | CD11bmid Monocytes | n.s.                               | n.s.                                         | 5.654E-05                          | 2.443E-02                                    | Up                 | Marrow 2 Only                                           |
| Dasatinib | PMAiono  | 174-pSrcFK    | Myelocyte          | n.s.                               | n.s.                                         | 5.841E-05                          | 2.523E-02                                    | Down               | Marrow 2 Only                                           |
| Dasatinib | PMAiono  | 176-pCREB     | Mature CD8+ T      | n.s.                               | n.s.                                         | 6.223E-05                          | 2.688E-02                                    | Up                 | Marrow 2 Only                                           |
| Dasatinib | PMAiono  | 152-Ki67      | CD11bhi Monocytes  | n.s.                               | n.s.                                         | 6.269E-05                          | 2.708E-02                                    | Up                 | Marrow 2 Only                                           |
| Dasatinib | PMAiono  | 153-pMAPKAPK2 | Mature CD4+ T      | n.s.                               | n.s.                                         | 6.306E-05                          | 2.724E-02                                    | Up                 | Marrow 2 Only                                           |
| Dasatinib | PMAiono  | 169-pP38      | Myelocyte          | n.s.                               | n.s.                                         | 6.586E-05                          | 2.845E-02                                    | Up                 | Marrow 2 Only                                           |
| Dasatinib | PMAiono  | 153-pMAPKAPK2 | Immature B         | n.s.                               | n.s.                                         | 6.796E-05                          | 2.936E-02                                    | Up                 | Marrow 2 Only                                           |
| Dasatinib | PMAiono  | 176-pCREB     | CD11b- Monocytes   | n.s.                               | n.s.                                         | 6.850E-05                          | 2.959E-02                                    | Up                 | Marrow 2 Only                                           |
| Dasatinib | PMAiono  | 151-pERK1/2   | Immature B         | n.s.                               | n.s.                                         | 6.868E-05                          | 2.967E-02                                    | Up                 | Marrow 2 Only                                           |
| Dasatinib | PMAiono  | 176-pCREB     | Immature B         | n.s.                               | n.s.                                         | 7.644E-05                          | 3.302E-02                                    | Up                 | Marrow 2 Only                                           |
| Dasatinib | PMAiono  | 153-pMAPKAPK2 | Mature CD8+ T      | n.s.                               | n.s.                                         | 9.709E-05                          | 4.194E-02                                    | Up                 | Marrow 2 Only                                           |
| Dasatinib | PMAiono  | 153-pMAPKAPK2 | Mature CD38lo B    | n.s.                               | n.s.                                         | 1.049E-04                          | 4.532E-02                                    | Up                 | Marrow 2 Only                                           |
| Dasatinib | PMAiono  | 169-pP38      | Mature CD4+ T      | n.s.                               | n.s.                                         | 1.081E-04                          | 4.668E-02                                    | Up                 | Marrow 2 Only                                           |
| Dasatinib | PMAiono  | 152-Ki67      | MEP                | n.s.                               | n.s.                                         | 1.094E-04                          | 4.728E-02                                    | Up                 | Marrow 2 Only                                           |
| Dasatinib | PMAiono  | 165-pNFkB     | Pre-B I            | n.s.                               | n.s.                                         | 1.106E-04                          | 4.778E-02                                    | Up                 | Marrow 2 Only                                           |
| Dasatinib | PVO4     | 169-pP38      | CD11bmid Monocytes | 6.099E-08                          | 2.635E-05                                    | n.s.                               | n.s.                                         | Up                 | Marrow 1 Only                                           |
| Dasatinib | PVO4     | 174-pSrcFK    | CD11bhi Monocytes  | 2.512E-07                          | 1.085E-04                                    | 4.902E-07                          | 2.118E-04                                    | Down               | Both                                                    |
| Dasatinib | PVO4     | 174-pSrcFK    | CD11bmid Monocytes | 3.404E-07                          | 1.471E-04                                    | 3.181E-06                          | 1.374E-03                                    | Down               | Both                                                    |
| Dasatinib | PVO4     | 169-pP38      | CD11b- Monocytes   | 1.150E-06                          | 4.970E-04                                    | n.s.                               | n.s.                                         | Up                 | Marrow 1 Only                                           |
| Dasatinib | PVO4     | 169-pP38      | CD11bhi Monocytes  | 1.428E-06                          | 6.169E-04                                    | n.s.                               | n.s.                                         | Up                 | Marrow 1 Only                                           |
| Dasatinib | PVO4     | 174-pSrcFK    | CD11b- Monocytes   | 1.432E-06                          | 6.188E-04                                    | 4.360E-05                          | 1.883E-02                                    | Down               | Both                                                    |
| Dasatinib | PVO4     | 171-pBtk/Itk  | Mature CD38lo B    | 1.625E-06                          | 7.020E-04                                    | n.s.                               | n.s.                                         | Down               | Marrow 1 Only                                           |
| Dasatinib | PVO4     | 174-pSrcFK    | Pre-B II           | 1.820E-06                          | 7.864E-04                                    | 4.625E-05                          | 1.998E-02                                    | Down               | Both                                                    |
| Dasatinib | PVO4     | 168-pH3       | CD11bhi Monocytes  | 1.879E-06                          | 8.117E-04                                    | 3.597E-05                          | 1.554E-02                                    | Down               | Both                                                    |
| Dasatinib | PVO4     | 171-pBtk/Itk  | HSC                | 2.237E-06                          | 9.663E-04                                    | n.s.                               | n.s.                                         | Down               | Marrow 1 Only                                           |
| Dasatinib | PVO4     | 169-pP38      | Mature CD8+ T      | 6.024E-06                          | 2.603E-03                                    | n.s.                               | n.s.                                         | Up                 | Marrow 1 Only                                           |
| Dasatinib | PVO4     | 171-pBtk/Itk  | Mature CD8+ T      | 6.303E-06                          | 2.723E-03                                    | n.s.                               | n.s.                                         | Down               | Marrow 1 Only                                           |
| Dasatinib | PVO4     | 151-pERK1/2   | Plasma cell        | 6.533E-06                          | 2.822E-03                                    | n.s.                               | n.s.                                         | Up                 | Marrow 1 Only                                           |
| Dasatinib | PVO4     | 168-pH3       | CD11bmid Monocytes | 9.831E-06                          | 4.247E-03                                    | 4.562E-05                          | 1.971E-02                                    | Down               | Both                                                    |
| Dasatinib | PVO4     | 169-pP38      | MEP                | 1.218E-05                          | 5.261E-03                                    | 2.130E-05                          | 9.201E-03                                    | Up                 | Both                                                    |
| Dasatinib | PVO4     | 169-pP38      | Mature CD4+ T      | 1.524E-05                          | 6.585E-03                                    | n.s.                               | n.s.                                         | Up                 | Marrow 1 Only                                           |
| Dasatinib | PVO4     | 174-pSrcFK    | Naïve CD8+ T       | 1.826E-05                          | 7.889E-03                                    | 5.485E-05                          | 2.370E-02                                    | Down               | Both                                                    |
| Dasatinib | PVO4     | 171-pBtk/Itk  | Mature CD4+ T      | 1.960E-05                          | 8.467E-03                                    | n.s.                               | n.s.                                         | Down               | Marrow 1 Only                                           |
| Dasatinib | PVO4     | 169-pP38      | HSC                | 2.534E-05                          | 1.095E-02                                    | n.s.                               | n.s.                                         | Up                 | Marrow 1 Only                                           |
| Dasatinib | PVO4     | 169-pP38      | CMP                | 3.041E-05                          | 1.314E-02                                    | 2.909E-05                          | 1.257E-02                                    | Up                 | Both                                                    |
| Dasatinib | PVO4     | 171-pBtk/Itk  | CD11b- Monocytes   | 3.075E-05                          | 1.328E-02                                    | n.s.                               | n.s.                                         | Down               | Marrow 1 Only                                           |
| Dasatinib | PVO4     | 169-pP38      | NK                 | 3.206E-05                          | 1.385E-02                                    | n.s.                               | n.s.                                         | Up                 | Marrow 1 Only                                           |
| Dasatinib | PVO4     | 168-pH3       | CD11b- Monocytes   | 3.288E-05                          | 1.420E-02                                    | n.s.                               | n.s.                                         | Down               | Marrow 1 Only                                           |
| Dasatinib | PVO4     | 171-pBtk/Itk  | CD11bmid Monocytes | 3.545E-05                          | 1.531E-02                                    | n.s.                               | n.s.                                         | Down               | Marrow 1 Only                                           |
| Dasatinib | PVO4     | 171-pBtk/Itk  | Naïve CD8+ T       | 3.667E-05                          | 1.584E-02                                    | n.s.                               | n.s.                                         | Down               | Marrow 1 Only                                           |
| Dasatinib | PVO4     | 166-IkBalph   | MEP                | 3.762E-05                          | 1.625E-02                                    | n.s.                               | n.s.                                         | Up                 | Marrow 1 Only                                           |
| Dasatinib | PVO4     | 171-pBtk/Itk  | CD11bhi Monocytes  | 4.299E-05                          | 1.857E-02                                    | n.s.                               | n.s.                                         | Down               | Marrow 1 Only                                           |
| Dasatinib | PVO4     | 171-pBtk/Itk  | CMP                | 5.015E-05                          | 2.167E-02                                    | n.s.                               | n.s.                                         | Down               | Marrow 1 Only                                           |
| Dasatinib | PVO4     | 174-pSrcFK    | Mature CD4+ T      | 5.187E-05                          | 2.241E-02                                    | 1.042E-04                          | 4.501E-02                                    | Down               | Both                                                    |
| Dasatinib | PVO4     | 174-pSrcFK    | Naïve CD4+ T       | 5.846E-05                          | 2.525E-02                                    | n.s.                               | n.s.                                         | Down               | Marrow 1 Only                                           |
| Dasatinib | PVO4     | 174-pSrcFK    | Mature CD8+ T      | 7.058E-05                          | 3.049E-02                                    | 2.174E-05                          | 9.390E-03                                    | Down               | Both                                                    |
| Dasatinib | PVO4     | 169-pP38      | MPP                | 7.153E-05                          | 3.090E-02                                    | 8.196E-05                          | 3.541E-02                                    | Up                 | Both                                                    |
| Dasatinib | PVO4     | 153-pMAPKAPK2 | Plasma cell        | 7.393E-05                          | 3.194E-02                                    | n.s.                               | n.s.                                         | Up                 | Marrow 1 Only                                           |
| Dasatinib | PVO4     | 171-pBtk/Itk  | MEP                | 7.458E-05                          | 3.222E-02                                    | n.s.                               | n.s.                                         | Down               | Marrow 1 Only                                           |
| Dasatinib | PVO4     | 176-pCREB     | Naïve CD4+ T       | 7.568E-05                          | 3.270E-02                                    | n.s.                               | n.s.                                         | Up                 | Marrow 1 Only                                           |
| Dasatinib | PVO4     | 171-pBtk/Itk  | Naïve CD4+ T       | 8.314E-05                          | 3.592E-02                                    | n.s.                               | n.s.                                         | Down               | Marrow 1 Only                                           |

| Inhibitor | Stimulus | Antibody       | Population         | Marrow 1 unadjusted t-test P value | Marrow 1 Bonferroni-corrected t-test P value | Marrow 2 unadjusted t-test P value | Marrow 2 Bonferroni-corrected t-test P value | Direction of Shift | Dataset(s) with significant shift (Bonferroni P < 0.05) |
|-----------|----------|----------------|--------------------|------------------------------------|----------------------------------------------|------------------------------------|----------------------------------------------|--------------------|---------------------------------------------------------|
| Dasatinib | PVO4     | 172-pS6        | Megakaryocyte      | 8.577E-05                          | 3.705E-02                                    | n.s.                               | n.s.                                         | Down               | Marrow 1 Only                                           |
| Dasatinib | PVO4     | 176-pCREB      | HSC                | 8.601E-05                          | 3.716E-02                                    | n.s.                               | n.s.                                         | Up                 | Marrow 1 Only                                           |
| Dasatinib | PVO4     | 159-pSTAT3     | Immature B         | 9.389E-05                          | 4.056E-02                                    | n.s.                               | n.s.                                         | Down               | Marrow 1 Only                                           |
| Dasatinib | PVO4     | 169-pP38       | Naïve CD8+ T       | 9.711E-05                          | 4.195E-02                                    | n.s.                               | n.s.                                         | Up                 | Marrow 1 Only                                           |
| Dasatinib | PVO4     | 169-pP38       | Plasmacytoid DC    | 1.013E-04                          | 4.375E-02                                    | n.s.                               | n.s.                                         | Up                 | Marrow 1 Only                                           |
| Dasatinib | PVO4     | 174-pSrcFK     | Mature CD38lo B    | 1.030E-04                          | 4.450E-02                                    | n.s.                               | n.s.                                         | Down               | Marrow 1 Only                                           |
| Dasatinib | PVO4     | 159-pSTAT3     | CD11bhi Monocytes  | 1.100E-04                          | 4.753E-02                                    | 1.373E-05                          | 5.932E-03                                    | Down               | Both                                                    |
| Dasatinib | PVO4     | 171-pBtk/Itk   | Plasmacytoid DC    | 1.115E-04                          | 4.818E-02                                    | n.s.                               | n.s.                                         | Down               | Marrow 1 Only                                           |
| Dasatinib | PVO4     | 150-pSTAT5     | Plasmacytoid DC    | 1.130E-04                          | 4.882E-02                                    | n.s.                               | n.s.                                         | Up                 | Marrow 1 Only                                           |
| Dasatinib | PVO4     | 141-pPLCgamma2 | MEP                | n.s.                               | n.s.                                         | 8.643E-07                          | 3.734E-04                                    | Up                 | Marrow 2 Only                                           |
| Dasatinib | PVO4     | 169-pP38       | Myelocyte          | n.s.                               | n.s.                                         | 1.048E-06                          | 4.528E-04                                    | Up                 | Marrow 2 Only                                           |
| Dasatinib | PVO4     | 151-pERK1/2    | MEP                | n.s.                               | n.s.                                         | 2.382E-06                          | 1.029E-03                                    | Up                 | Marrow 2 Only                                           |
| Dasatinib | PVO4     | 164-pSLP-76    | Myelocyte          | n.s.                               | n.s.                                         | 2.510E-06                          | 1.084E-03                                    | Up                 | Marrow 2 Only                                           |
| Dasatinib | PVO4     | 152-Ki67       | Plasma cell        | n.s.                               | n.s.                                         | 3.819E-06                          | 1.650E-03                                    | Up                 | Marrow 2 Only                                           |
| Dasatinib | PVO4     | 153-pMAPKAPK2  | GMP                | n.s.                               | n.s.                                         | 5.369E-06                          | 2.319E-03                                    | Up                 | Marrow 2 Only                                           |
| Dasatinib | PVO4     | 141-pPLCgamma2 | Myelocyte          | n.s.                               | n.s.                                         | 6.451E-06                          | 2.787E-03                                    | Up                 | Marrow 2 Only                                           |
| Dasatinib | PVO4     | 169-pP38       | Erythroblast       | n.s.                               | n.s.                                         | 9.096E-06                          | 3.930E-03                                    | Up                 | Marrow 2 Only                                           |
| Dasatinib | PVO4     | 164-pSLP-76    | Immature B         | n.s.                               | n.s.                                         | 1.166E-05                          | 5.036E-03                                    | Up                 | Marrow 2 Only                                           |
| Dasatinib | PVO4     | 153-pMAPKAPK2  | CD11bmid Monocytes | n.s.                               | n.s.                                         | 1.348E-05                          | 5.823E-03                                    | Up                 | Marrow 2 Only                                           |
| Dasatinib | PVO4     | 141-pPLCgamma2 | Plasmacytoid DC    | n.s.                               | n.s.                                         | 1.476E-05                          | 6.377E-03                                    | Up                 | Marrow 2 Only                                           |
| Dasatinib | PVO4     | 153-pMAPKAPK2  | Mature CD8+ T      | n.s.                               | n.s.                                         | 1.775E-05                          | 7.667E-03                                    | Up                 | Marrow 2 Only                                           |
| Dasatinib | PVO4     | 151-pERK1/2    | Mature CD4+ T      | n.s.                               | n.s.                                         | 2.207E-05                          | 9.533E-03                                    | Up                 | Marrow 2 Only                                           |
| Dasatinib | PVO4     | 153-pMAPKAPK2  | CD11b- Monocytes   | n.s.                               | n.s.                                         | 2.386E-05                          | 1.031E-02                                    | Up                 | Marrow 2 Only                                           |
| Dasatinib | PVO4     | 141-pPLCgamma2 | CMP                | n.s.                               | n.s.                                         | 2.412E-05                          | 1.042E-02                                    | Up                 | Marrow 2 Only                                           |
| Dasatinib | PVO4     | 176-pCREB      | MPP                | n.s.                               | n.s.                                         | 3.013E-05                          | 1.302E-02                                    | Up                 | Marrow 2 Only                                           |
| Dasatinib | PVO4     | 174-pSrcFK     | NK                 | n.s.                               | n.s.                                         | 3.187E-05                          | 1.377E-02                                    | Down               | Marrow 2 Only                                           |
| Dasatinib | PVO4     | 153-pMAPKAPK2  | MEP                | n.s.                               | n.s.                                         | 3.445E-05                          | 1.488E-02                                    | Up                 | Marrow 2 Only                                           |
| Dasatinib | PVO4     | 172-pS6        | Plasma cell        | n.s.                               | n.s.                                         | 4.995E-05                          | 2.158E-02                                    | Down               | Marrow 2 Only                                           |
| Dasatinib | PVO4     | 169-pP38       | Megakaryocyte      | n.s.                               | n.s.                                         | 5.314E-05                          | 2.296E-02                                    | Up                 | Marrow 2 Only                                           |
| Dasatinib | PVO4     | 156-pZAP70/Syk | CD11b- Monocytes   | n.s.                               | n.s.                                         | 5.943E-05                          | 2.568E-02                                    | Down               | Marrow 2 Only                                           |
| Dasatinib | PVO4     | 153-pMAPKAPK2  | CD11bhi Monocytes  | n.s.                               | n.s.                                         | 6.167E-05                          | 2.664E-02                                    | Up                 | Marrow 2 Only                                           |
| Dasatinib | PVO4     | 153-pMAPKAPK2  | Pre-B I            | n.s.                               | n.s.                                         | 6.388E-05                          | 2.759E-02                                    | Up                 | Marrow 2 Only                                           |
| Dasatinib | PVO4     | 153-pMAPKAPK2  | Mature CD4+ T      | n.s.                               | n.s.                                         | 8.364E-05                          | 3.613E-02                                    | Up                 | Marrow 2 Only                                           |
| Dasatinib | PVO4     | 153-pMAPKAPK2  | Plasmacytoid DC    | n.s.                               | n.s.                                         | 1.048E-04                          | 4.528E-02                                    | Up                 | Marrow 2 Only                                           |
| Dasatinib | PVO4     | 174-pSrcFK     | GMP                | n.s.                               | n.s.                                         | 1.085E-04                          | 4.687E-02                                    | Down               | Marrow 2 Only                                           |
| Dasatinib | PVO4     | 151-pERK1/2    | CMP                | n.s.                               | n.s.                                         | 1.148E-04                          | 4.959E-02                                    | Up                 | Marrow 2 Only                                           |
| JAKi      | Unstim   | 168-pH3        | CD11bhi Monocytes  | 5.032E-06                          | 2.174E-03                                    | n.s.                               | n.s.                                         | Down               | Marrow 1 Only                                           |
| JAKi      | Unstim   | 168-pH3        | CD11bmid Monocytes | 1.069E-05                          | 4.618E-03                                    | n.s.                               | n.s.                                         | Down               | Marrow 1 Only                                           |
| JAKi      | Unstim   | 168-pH3        | CD11b- Monocytes   | 1.464E-05                          | 6.325E-03                                    | n.s.                               | n.s.                                         | Down               | Marrow 1 Only                                           |
| JAKi      | Unstim   | 174-pSrcFK     | CD11bhi Monocytes  | n.s.                               | n.s.                                         | 2.195E-05                          | 9.485E-03                                    | Down               | Marrow 2 Only                                           |
| JAKi      | Unstim   | 151-pERK1/2    | Mature CD4+ T      | n.s.                               | n.s.                                         | 4.792E-05                          | 2.070E-02                                    | Up                 | Marrow 2 Only                                           |
| JAKi      | Unstim   | 174-pSrcFK     | CD11bmid Monocytes | n.s.                               | n.s.                                         | 8.519E-05                          | 3.680E-02                                    | Down               | Marrow 2 Only                                           |
| JAKi      | GCSF     | 168-pH3        | CD11bhi Monocytes  | 6.901E-06                          | 2.981E-03                                    | n.s.                               | n.s.                                         | Down               | Marrow 1 Only                                           |
| JAKi      | GCSF     | 168-pH3        | CD11bmid Monocytes | 1.628E-05                          | 7.034E-03                                    | n.s.                               | n.s.                                         | Down               | Marrow 1 Only                                           |
| JAKi      | GCSF     | 168-pH3        | CD11b- Monocytes   | 3.209E-05                          | 1.386E-02                                    | n.s.                               | n.s.                                         | Down               | Marrow 1 Only                                           |
| JAKi      | GCSF     | 159-pSTAT3     | HSC                | 5.612E-05                          | 2.424E-02                                    | n.s.                               | n.s.                                         | Down               | Marrow 1 Only                                           |
| JAKi      | GCSF     | 175-pCrkL      | Megakaryocyte      | 9.351E-05                          | 4.040E-02                                    | n.s.                               | n.s.                                         | Up                 | Marrow 1 Only                                           |
| JAKi      | GCSF     | 169-pP38       | CD11bmid Monocytes | 9.849E-05                          | 4.255E-02                                    | n.s.                               | n.s.                                         | Up                 | Marrow 1 Only                                           |
| JAKi      | GCSF     | 152-Ki67       | Plasma cell        | n.s.                               | n.s.                                         | 6.182E-06                          | 2.670E-03                                    | Up                 | Marrow 2 Only                                           |
| JAKi      | GCSF     | 151-pERK1/2    | Mature CD4+ T      | n.s.                               | n.s.                                         | 2.512E-05                          | 1.085E-02                                    | Up                 | Marrow 2 Only                                           |
| JAKi      | GCSF     | 151-pERK1/2    | Naïve CD4+ T       | n.s.                               | n.s.                                         | 5.705E-05                          | 2.464E-02                                    | Up                 | Marrow 2 Only                                           |
| JAKi      | GCSF     | 165-pNFkB      | Erythroblast       | n.s.                               | n.s.                                         | 7.350E-05                          | 3.175E-02                                    | Down               | Marrow 2 Only                                           |
